# Supplementary material for: Multi-Platform Whole-Genome Microarray Analyses Refine the Epigenetic Signature of Breast Cancer Metastasis with Gene Expression and Copy Number
Source: PubMed Central journal article supplement (PMC2801616; doi:10.1371/journal.pone.0008665), 2010-01-13

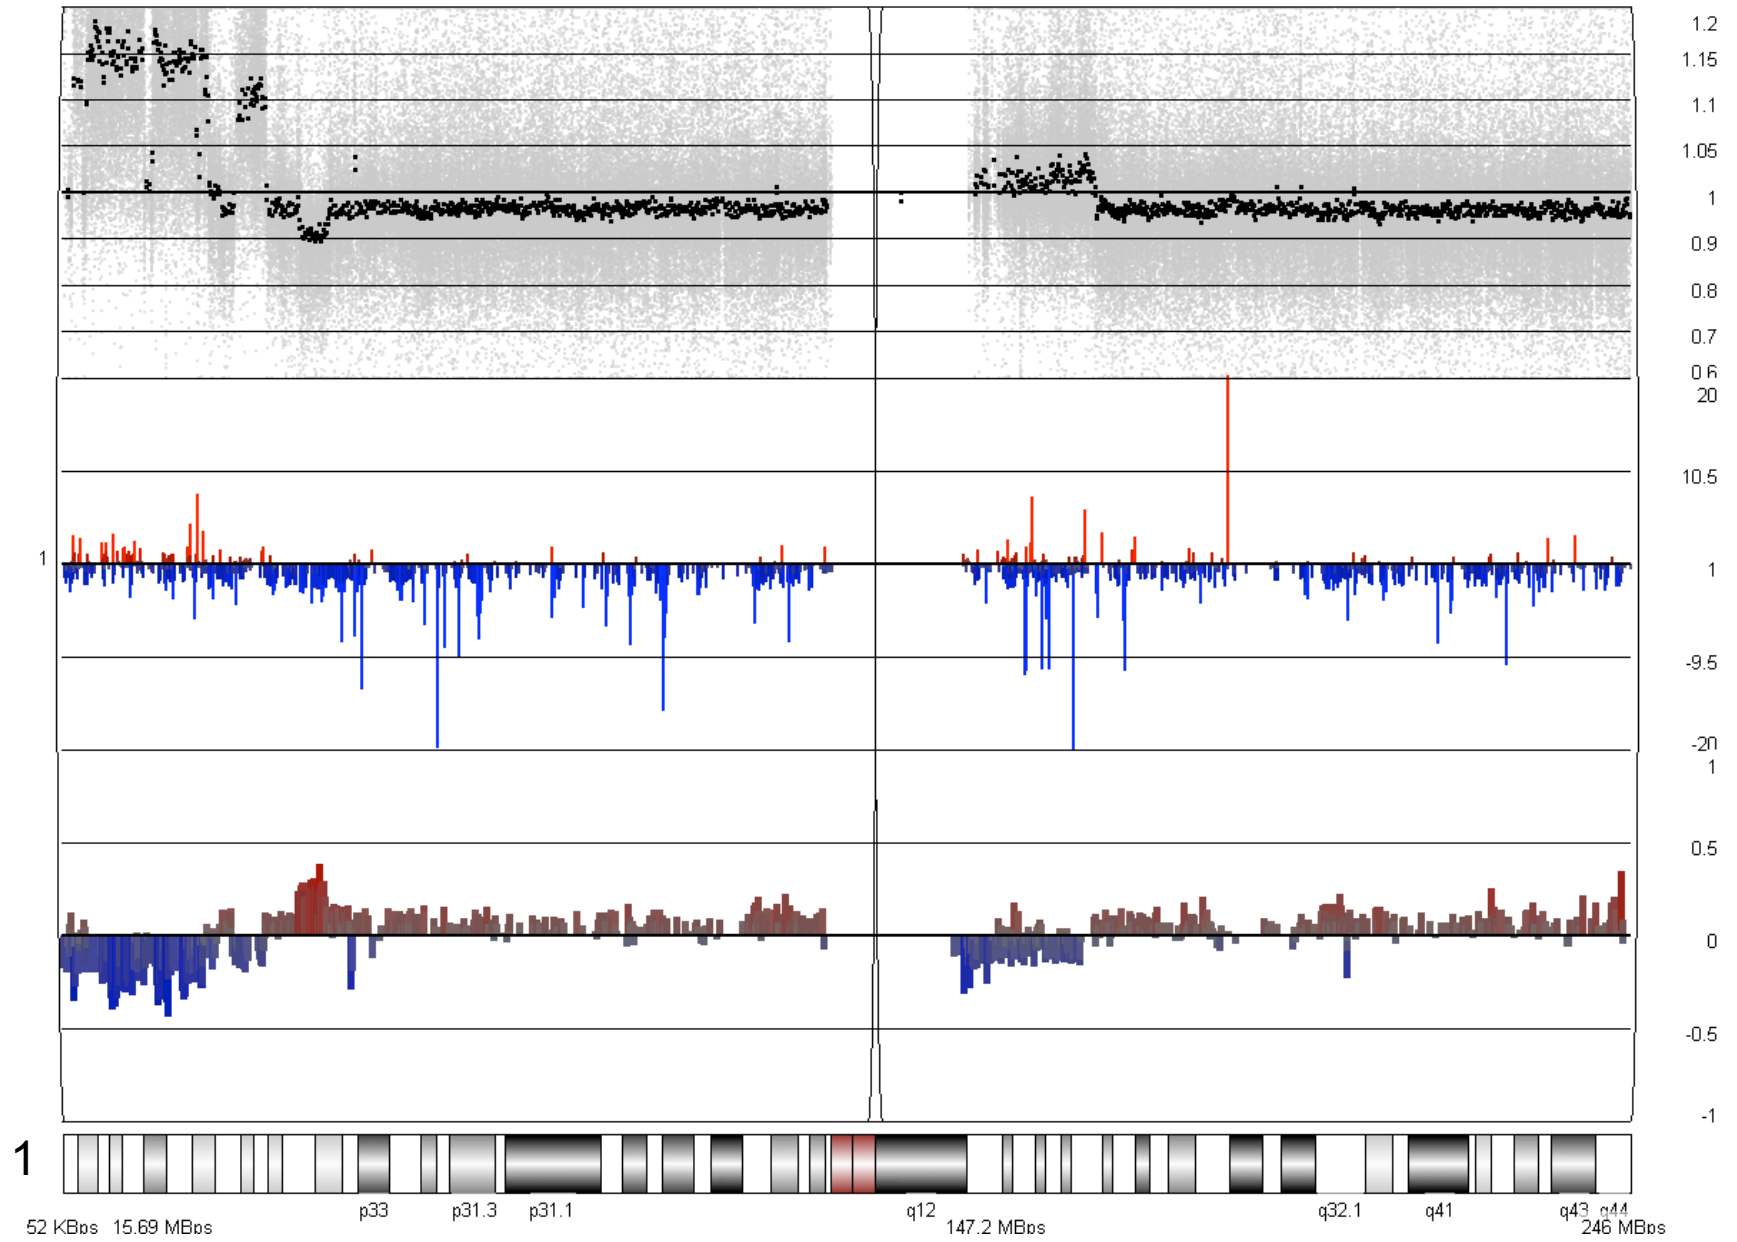

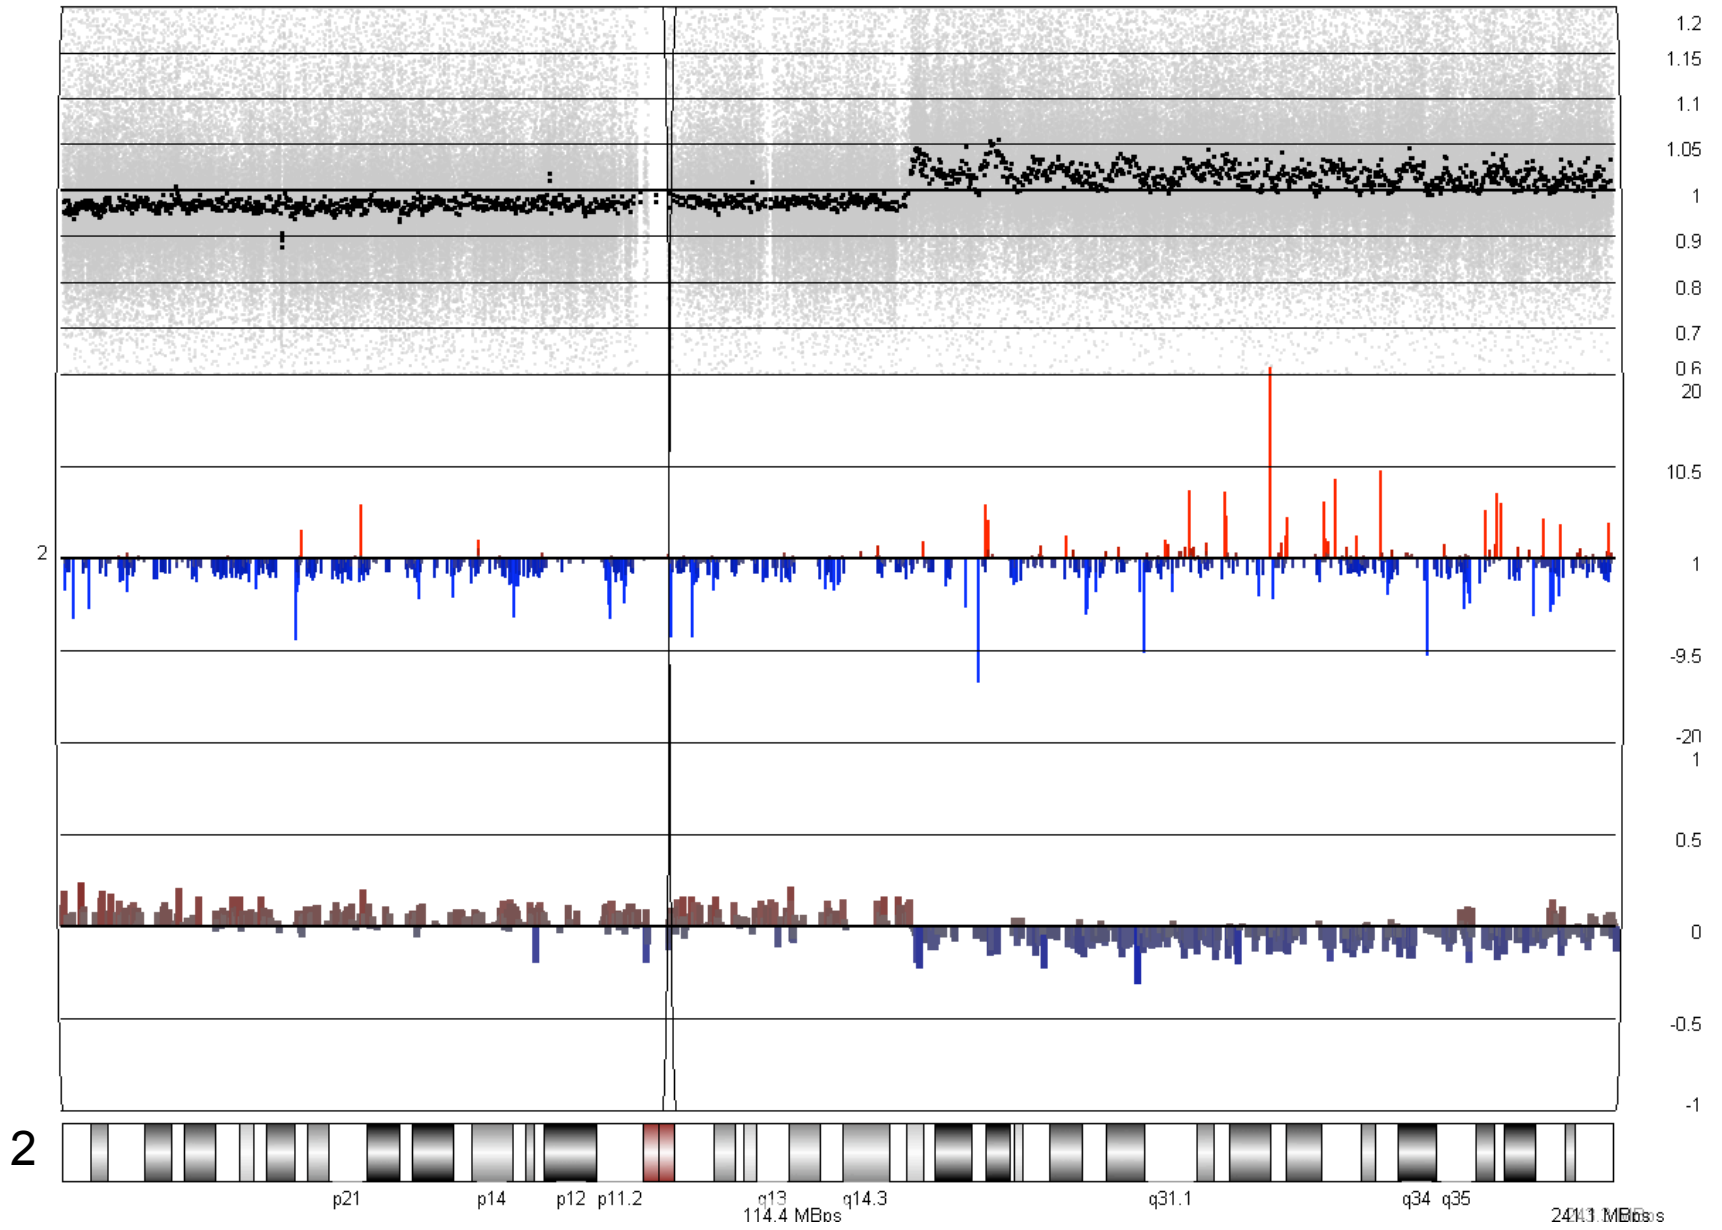

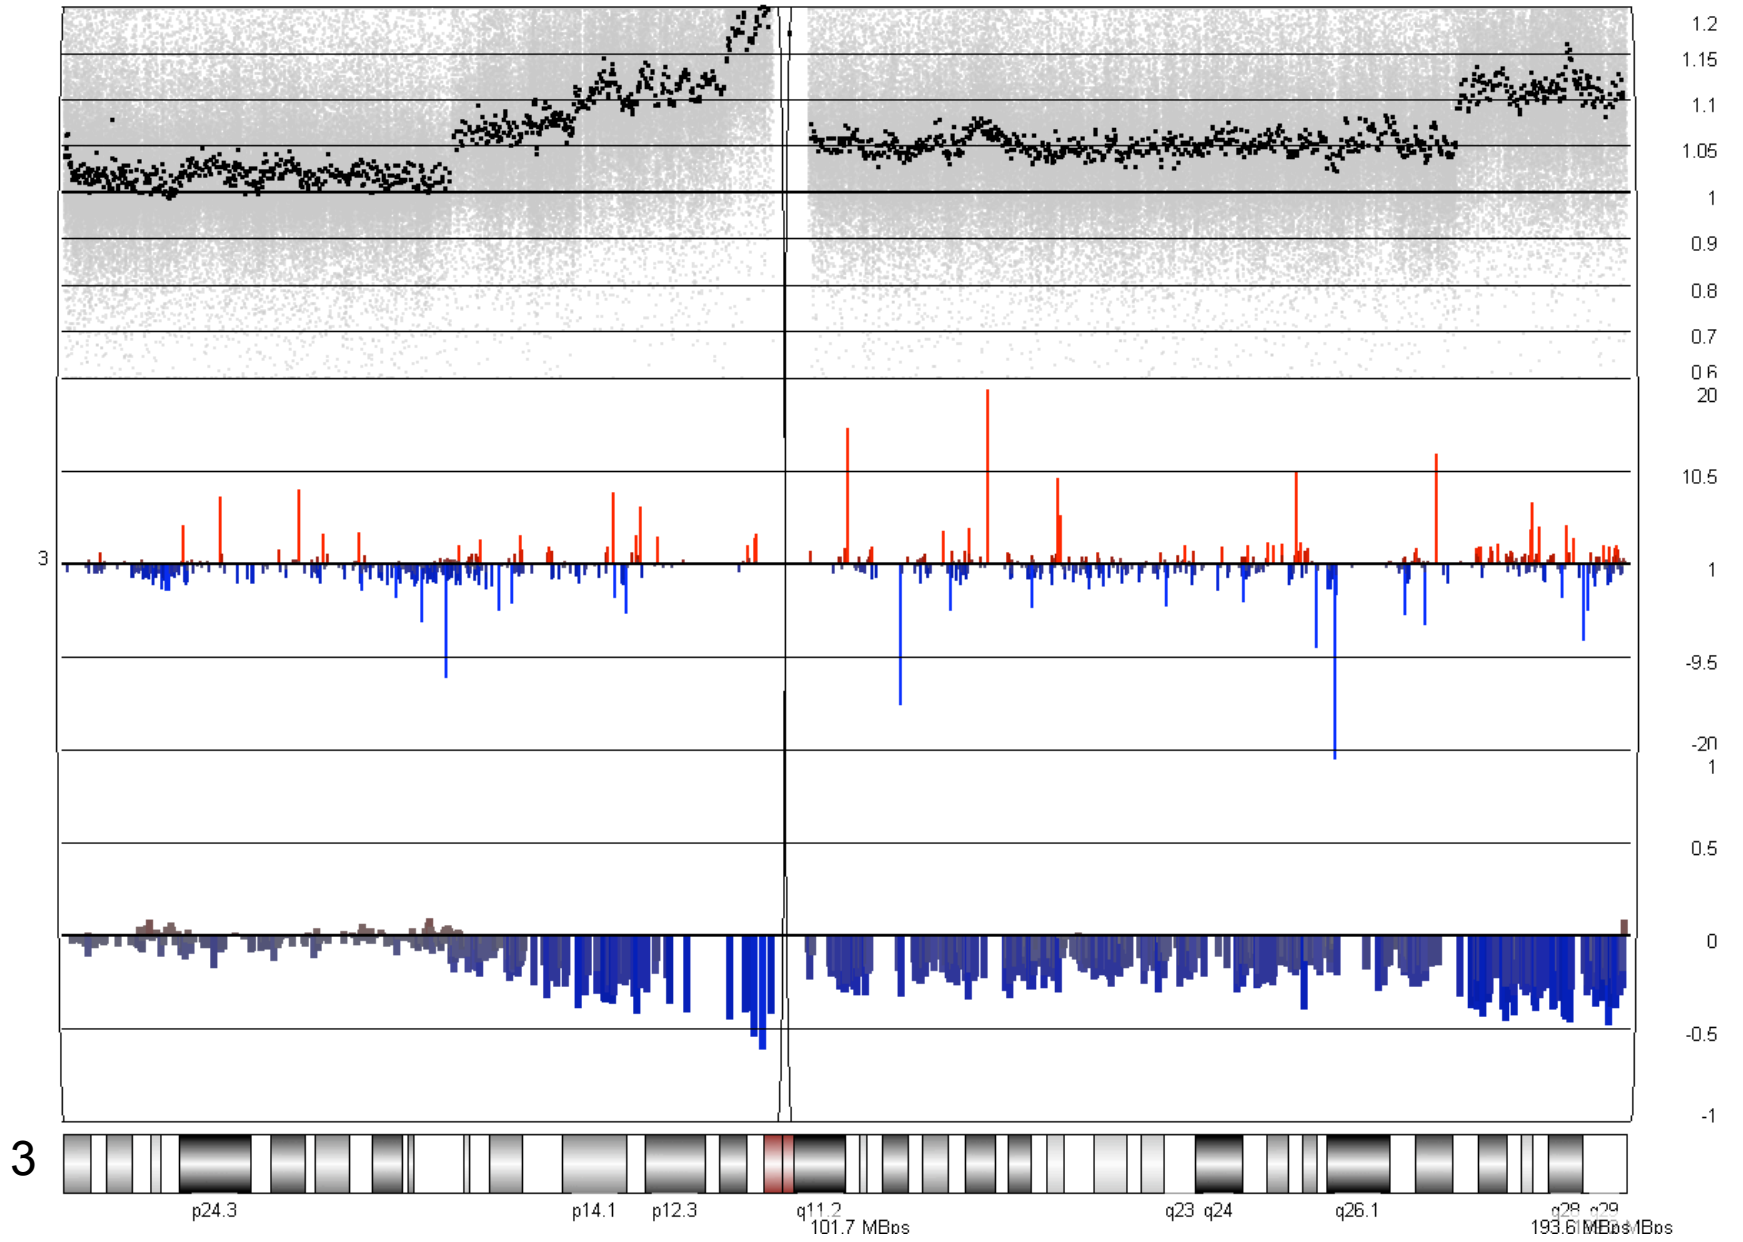

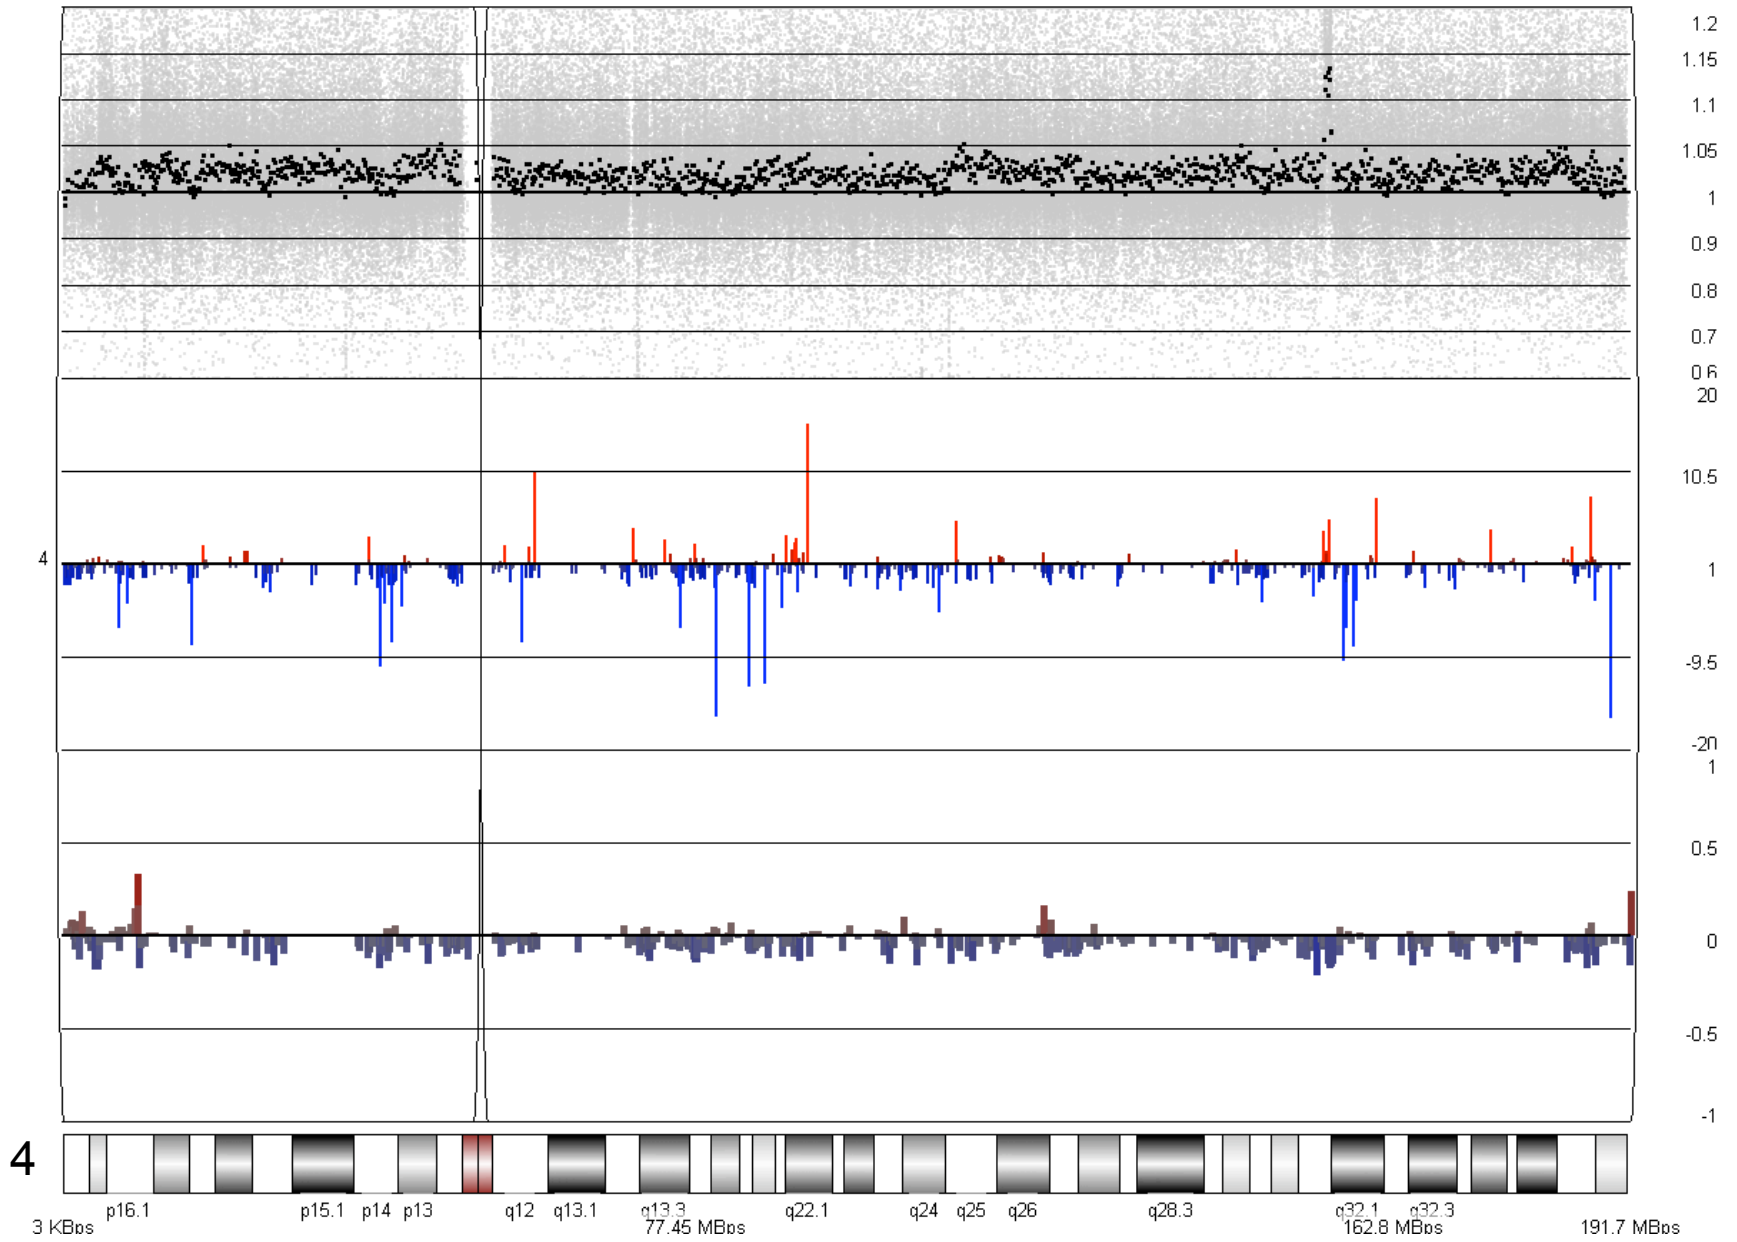

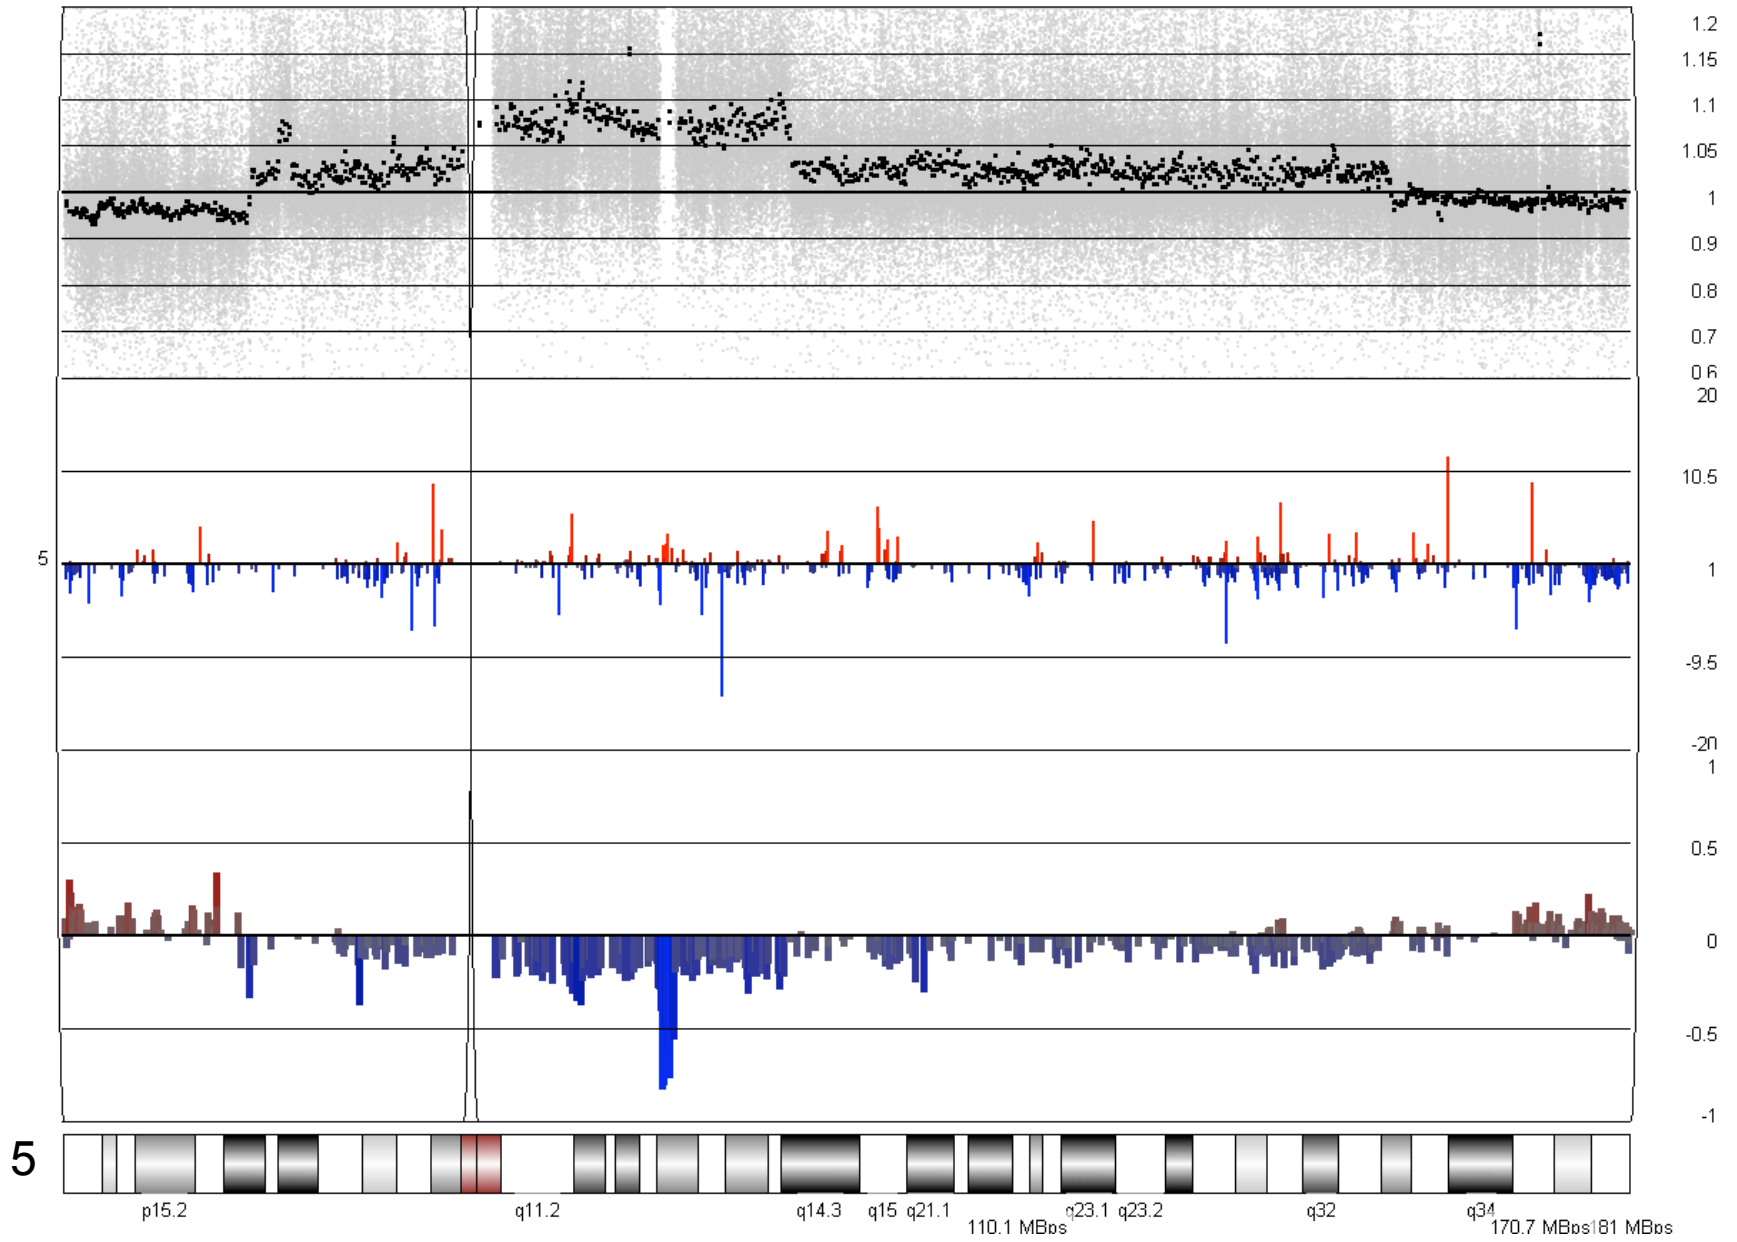

5

p15.2

q11.2

q14.3

q15

q21.1

110.1 MBos

q23.1

q23.2

q32

q34

170.7 MBos 181 MBos

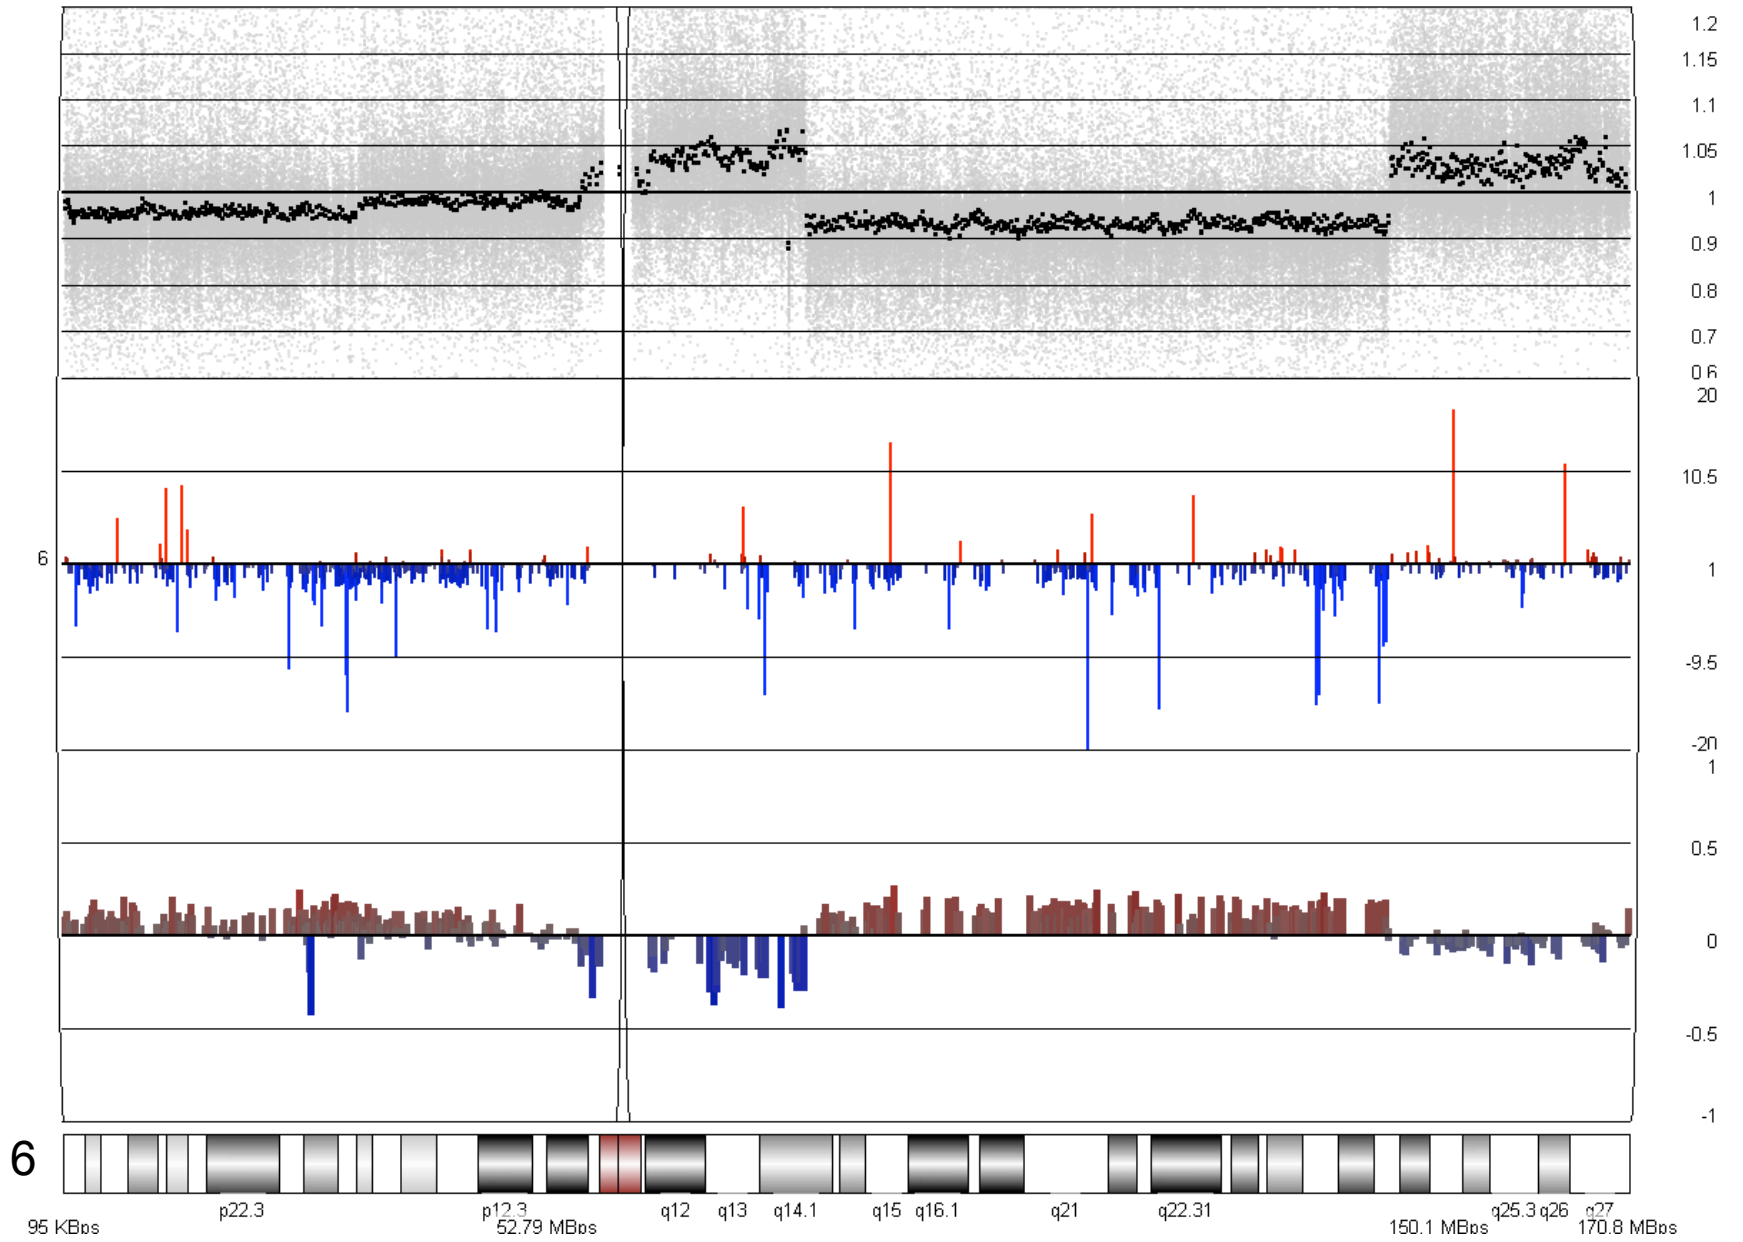

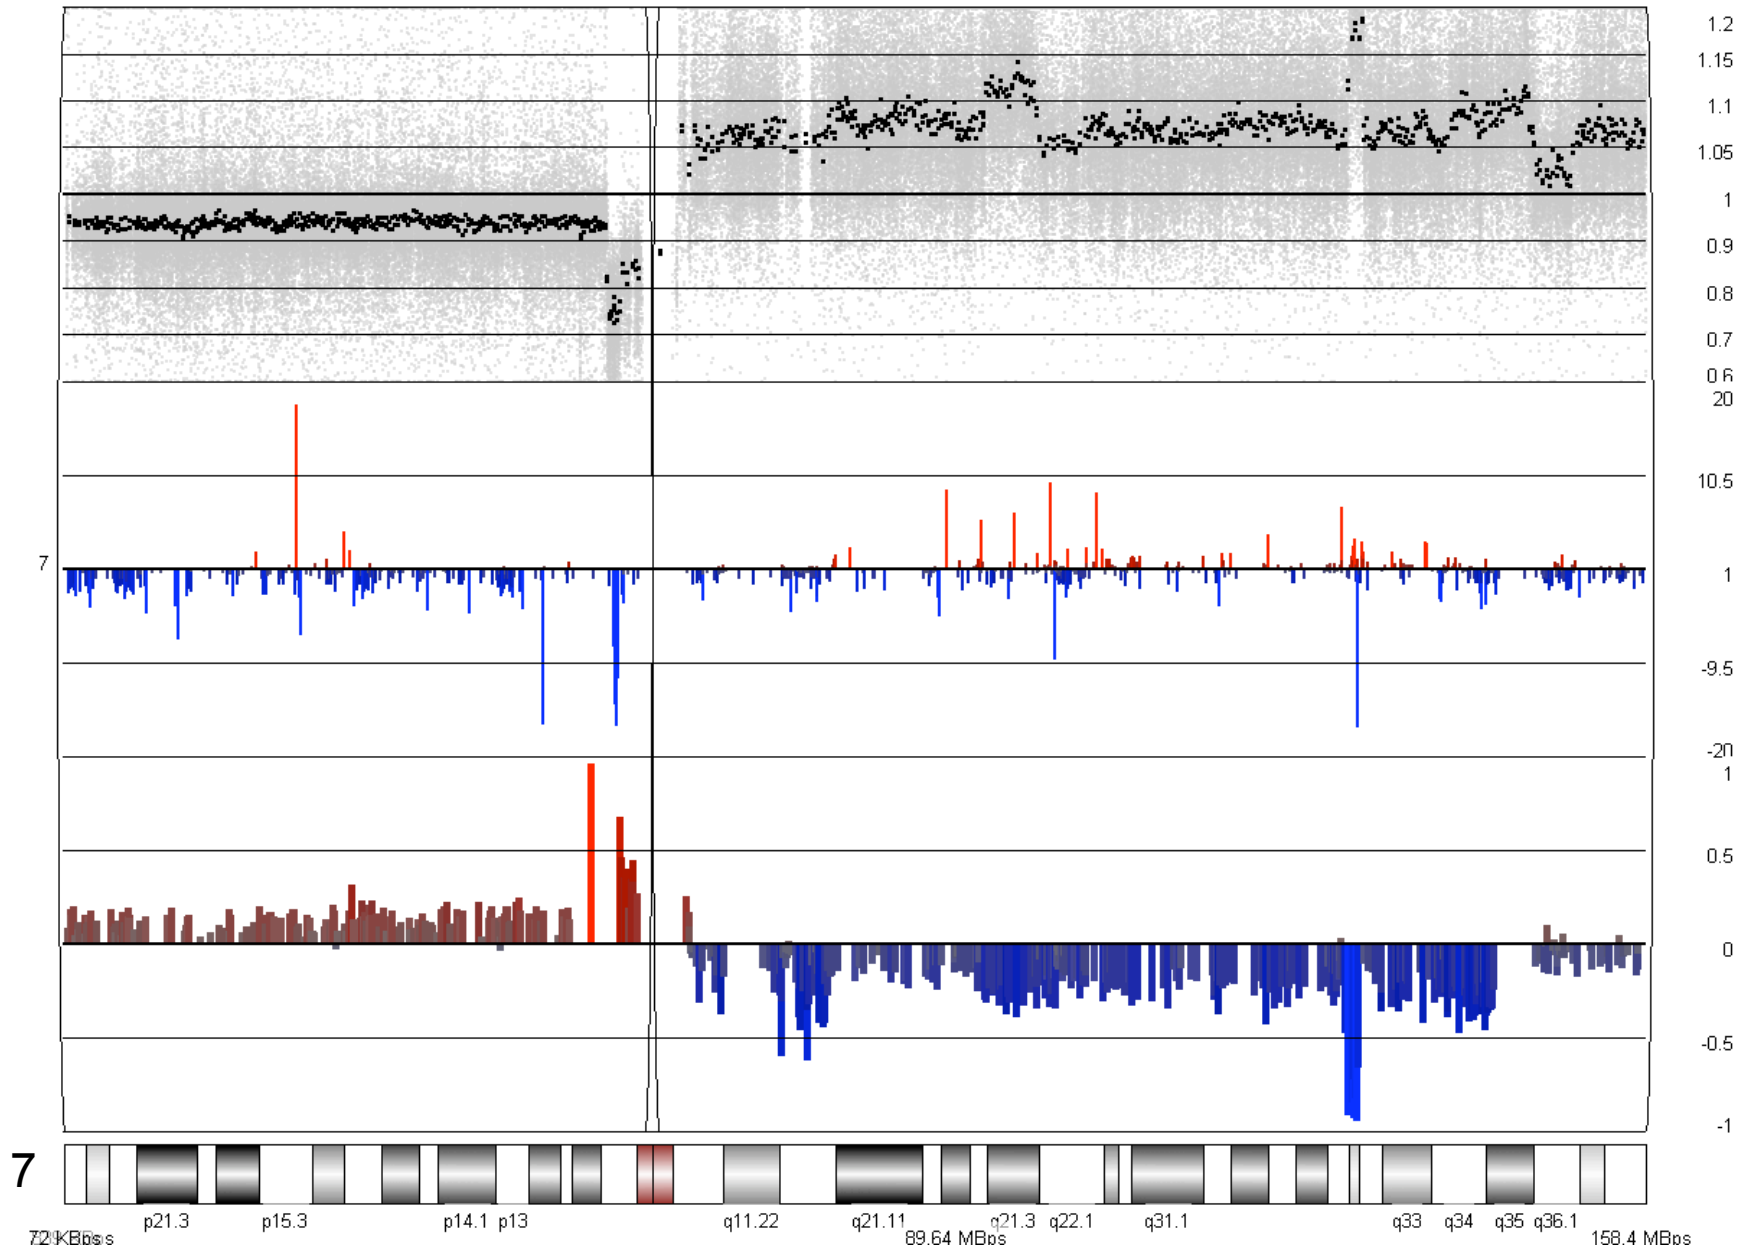

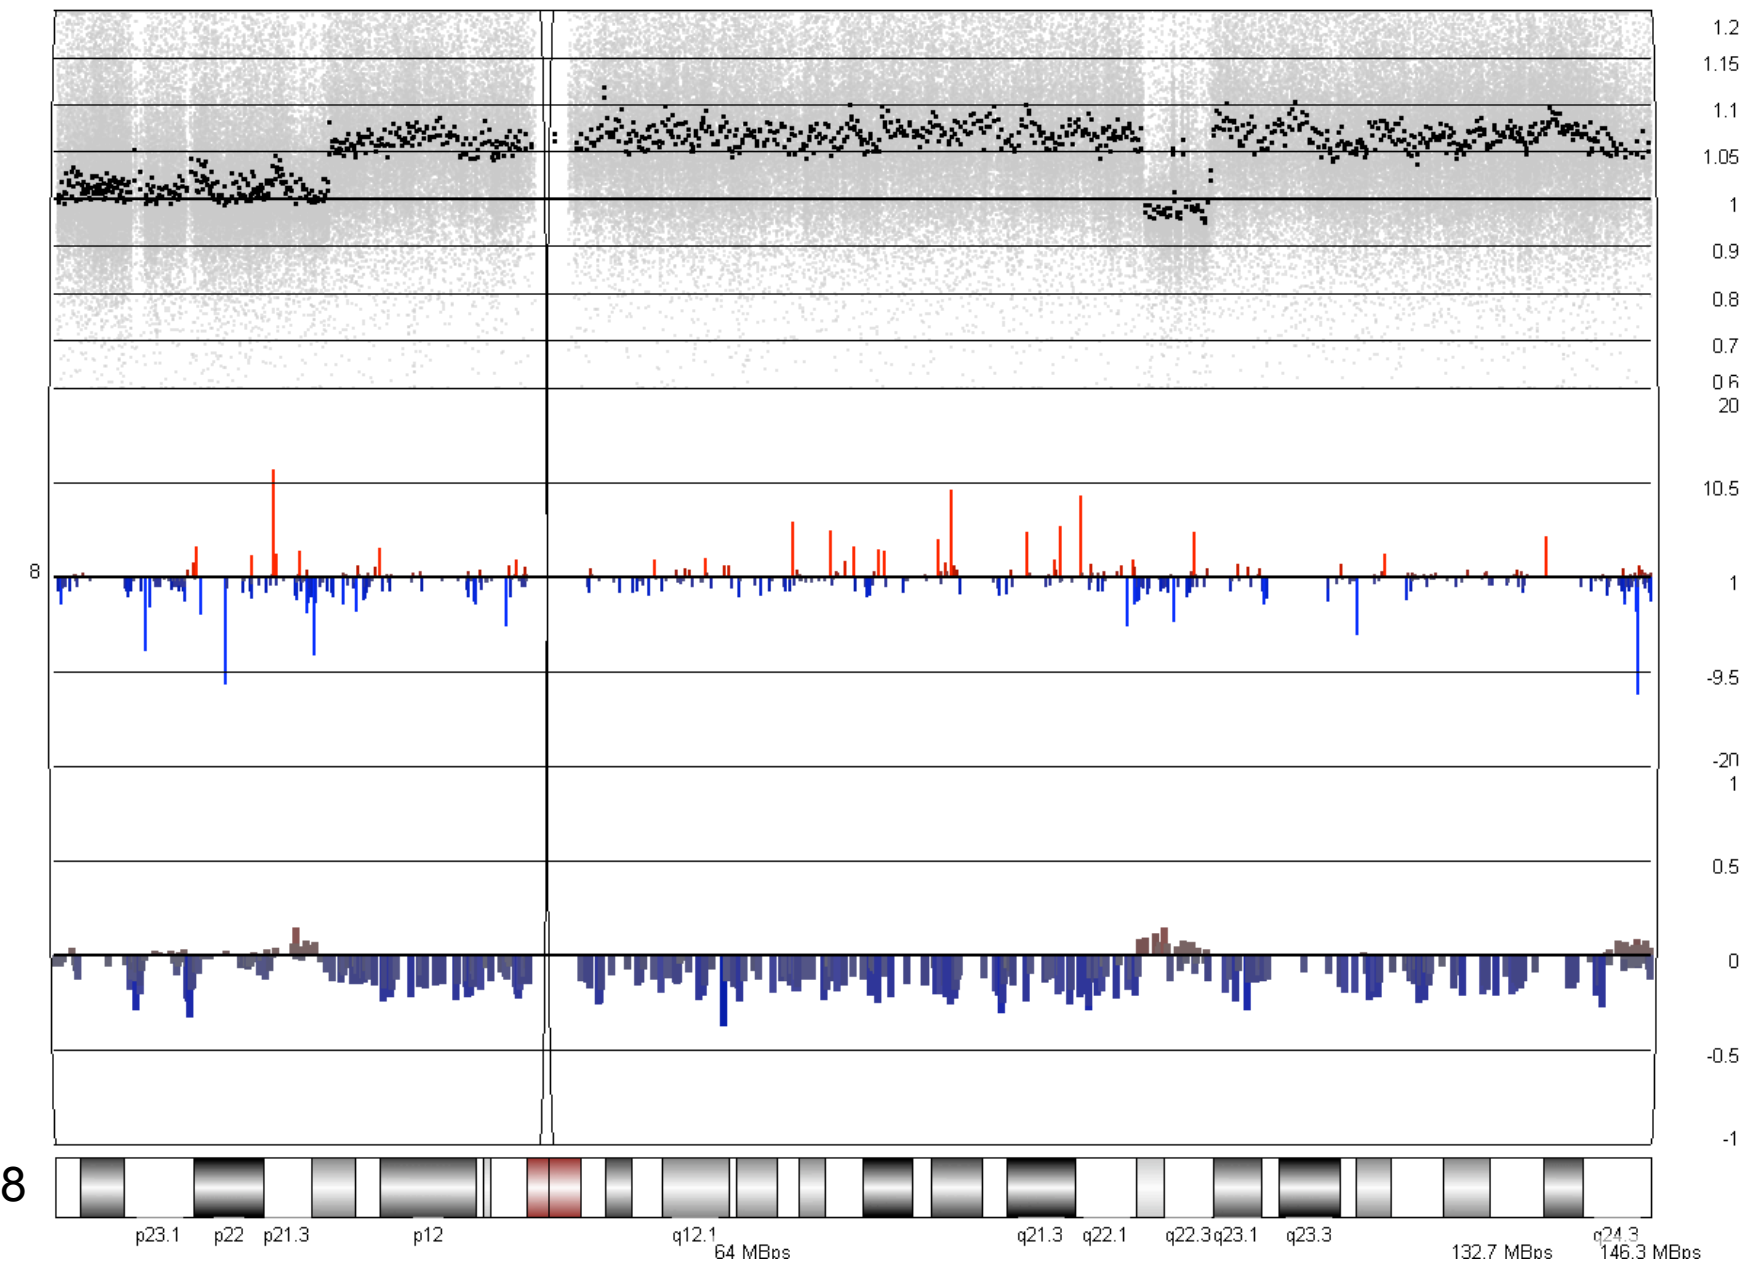



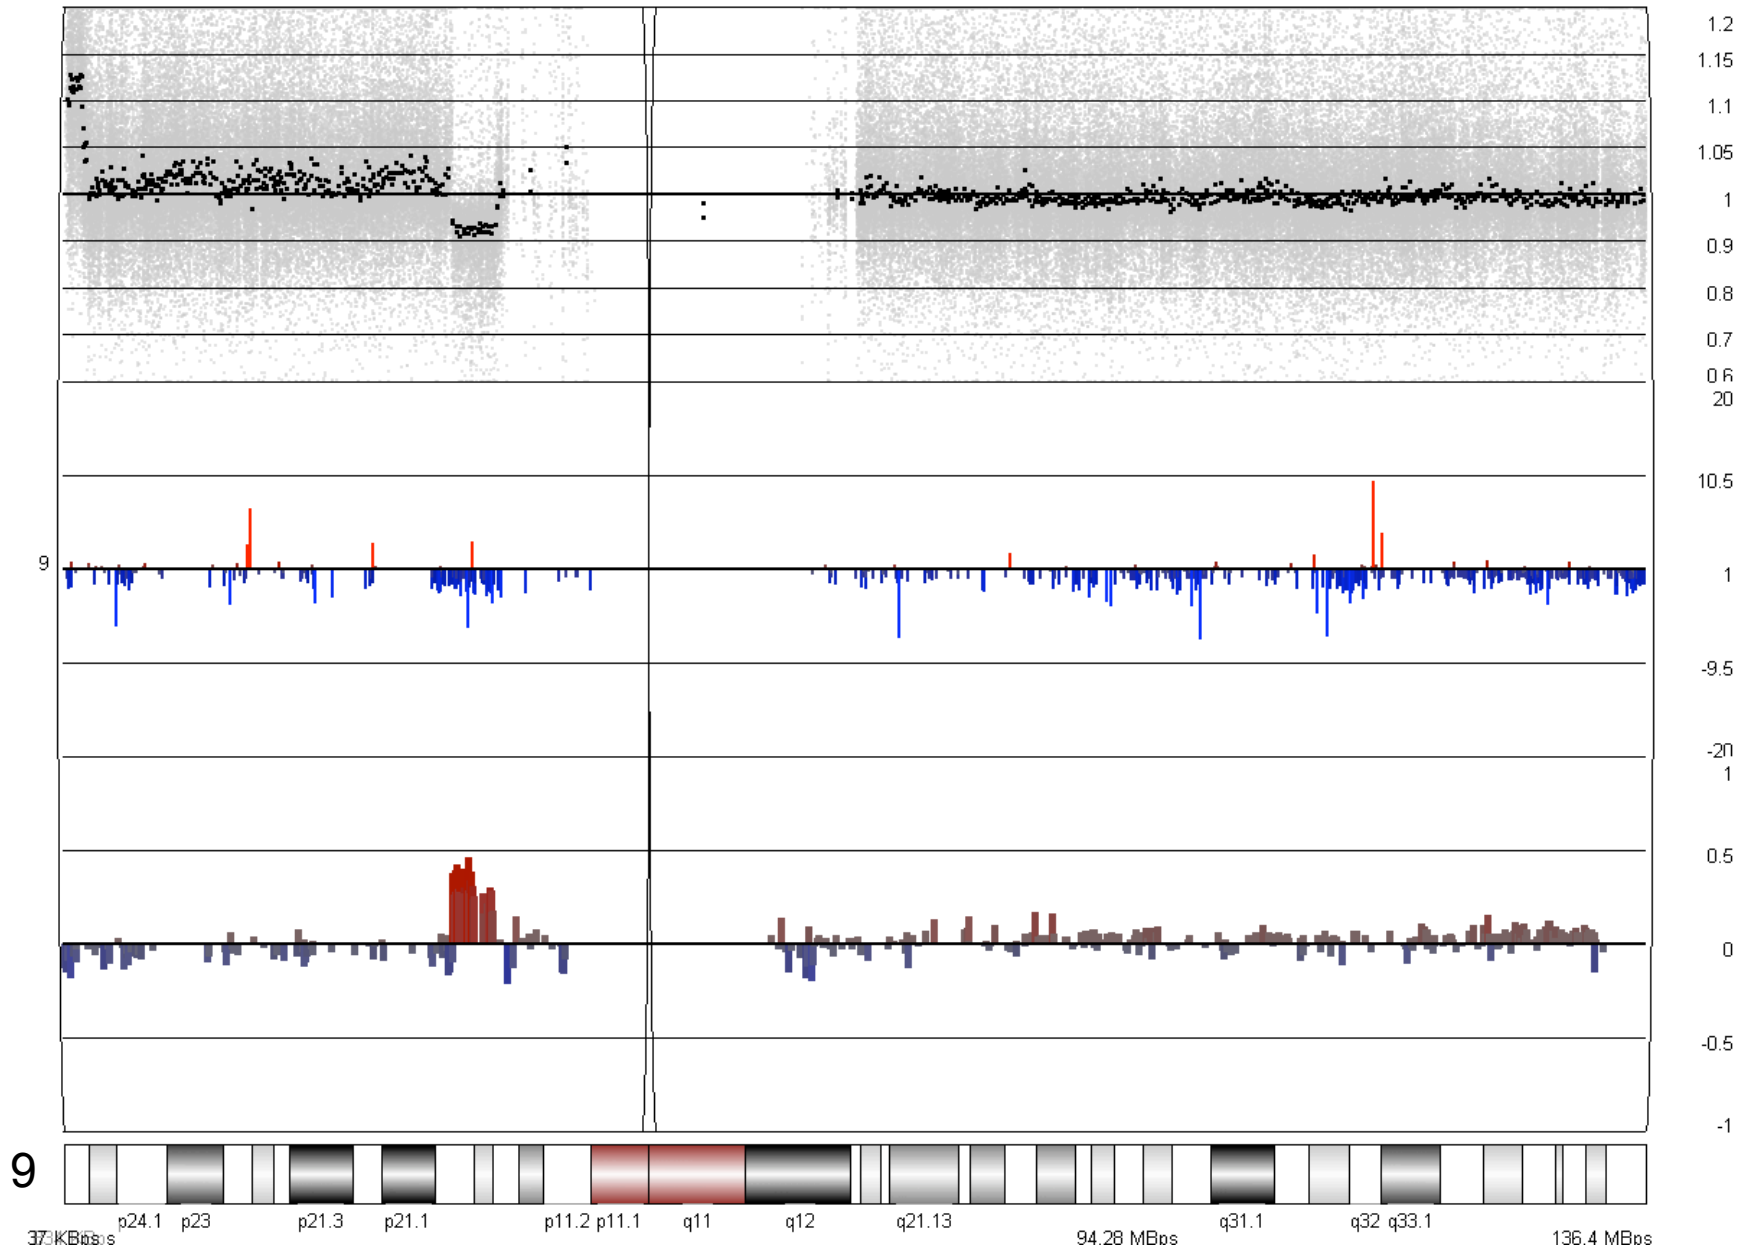

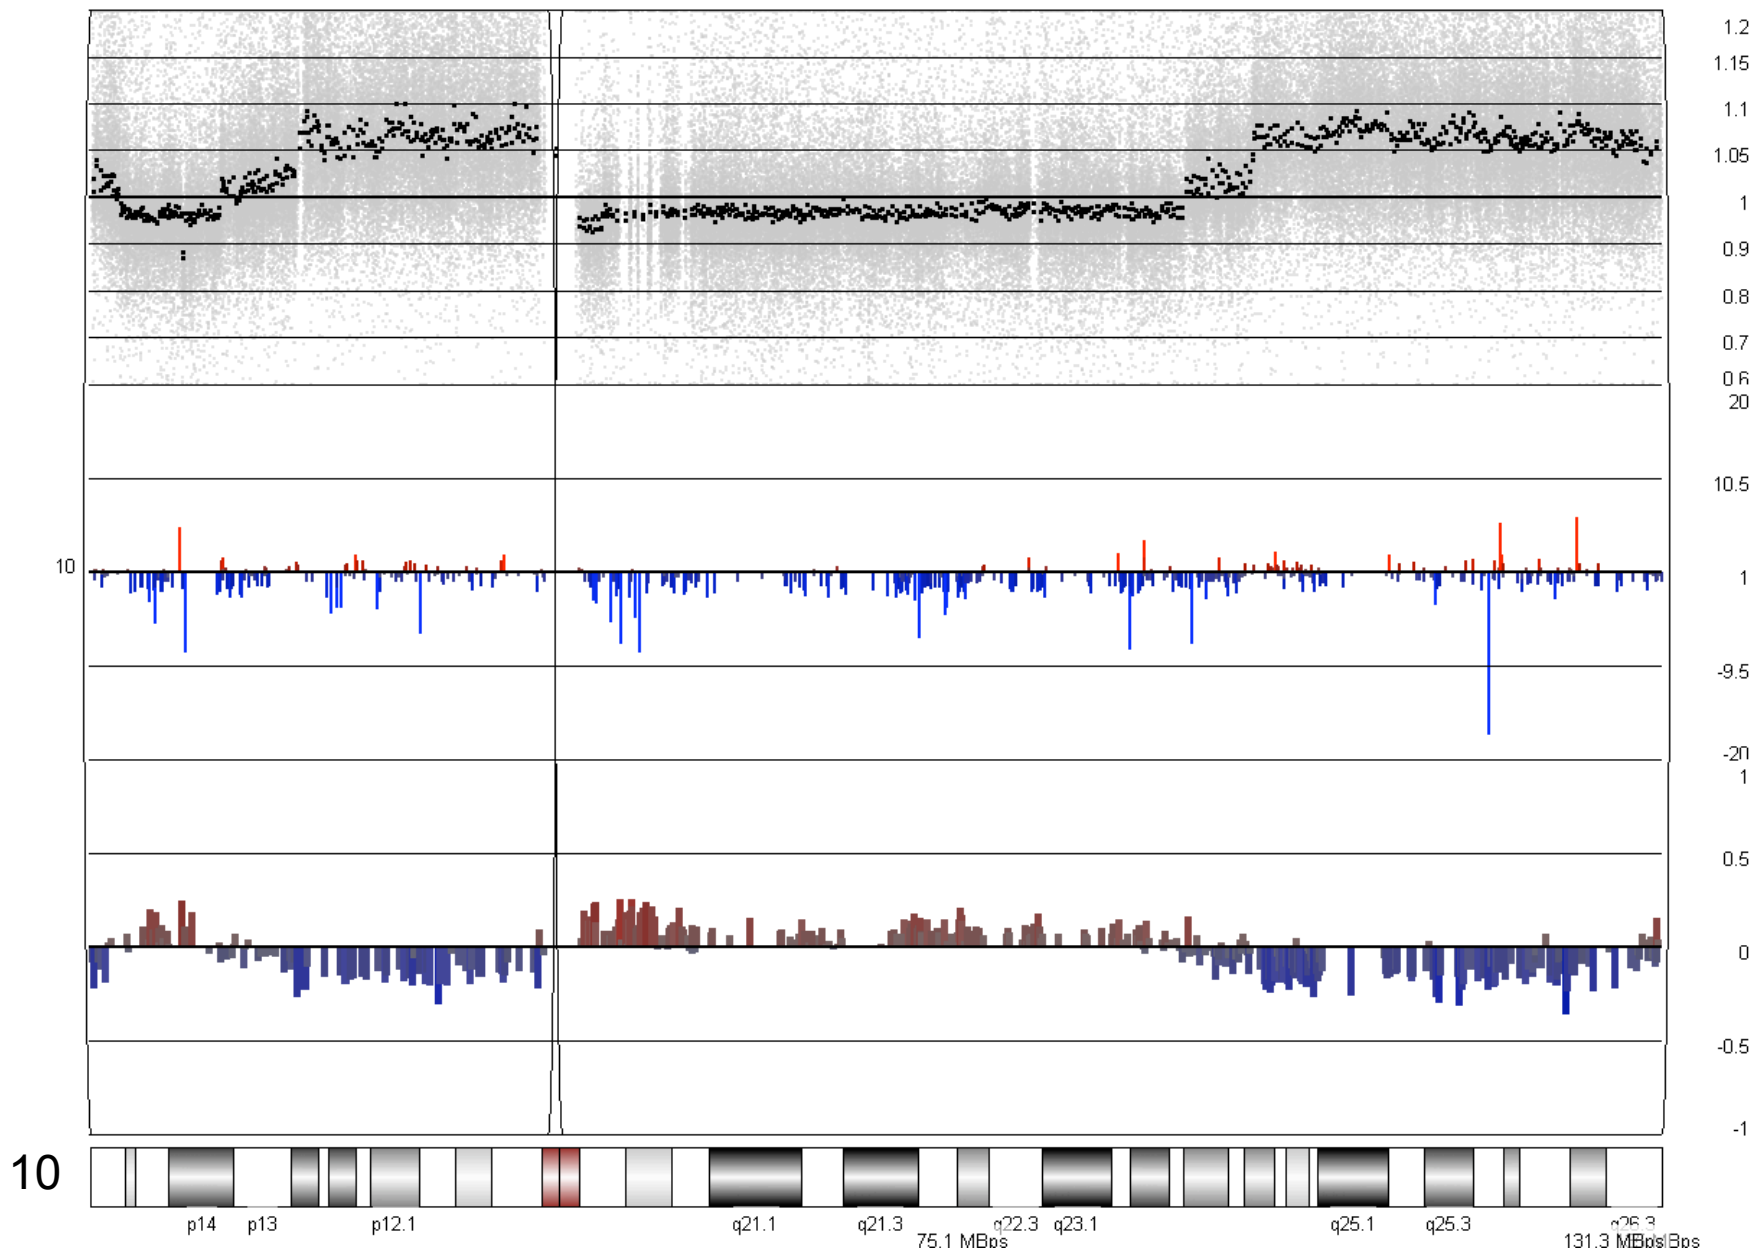

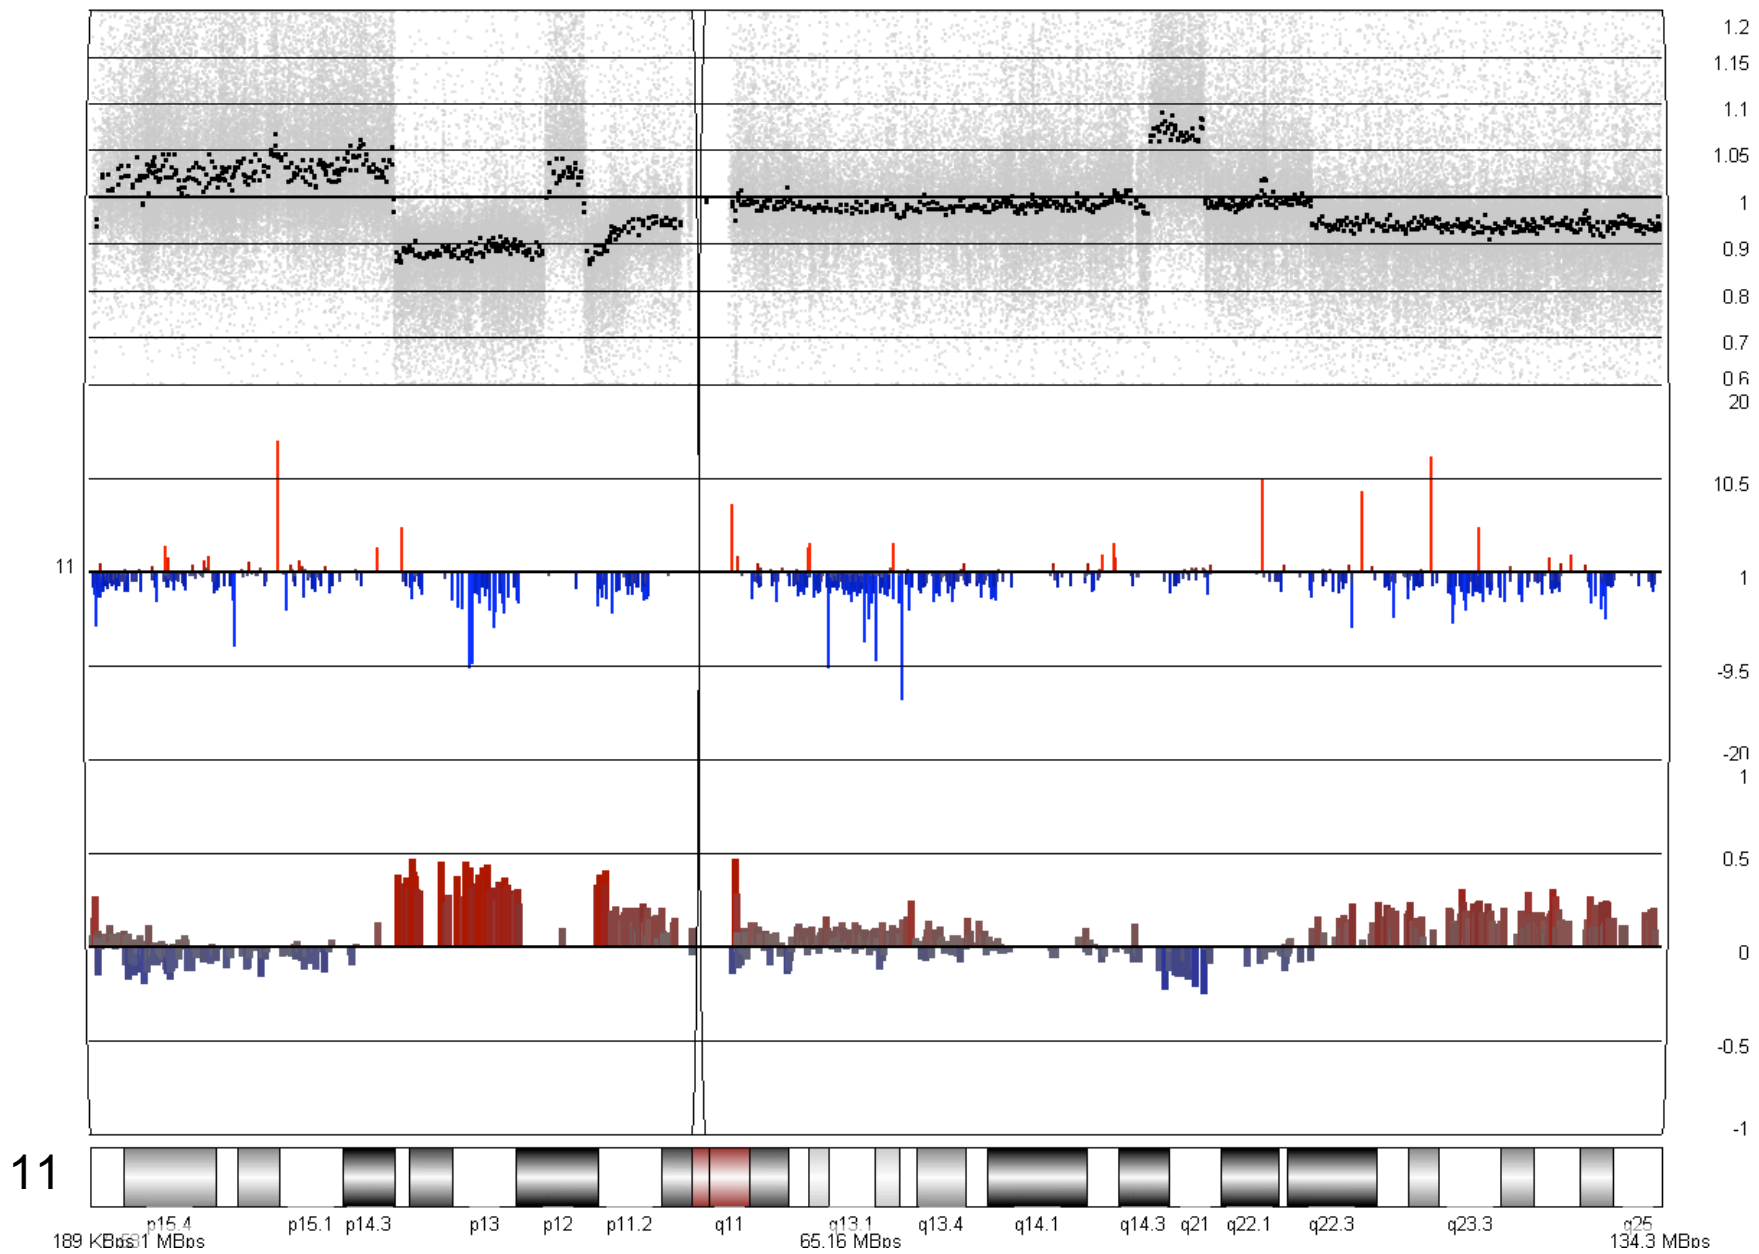

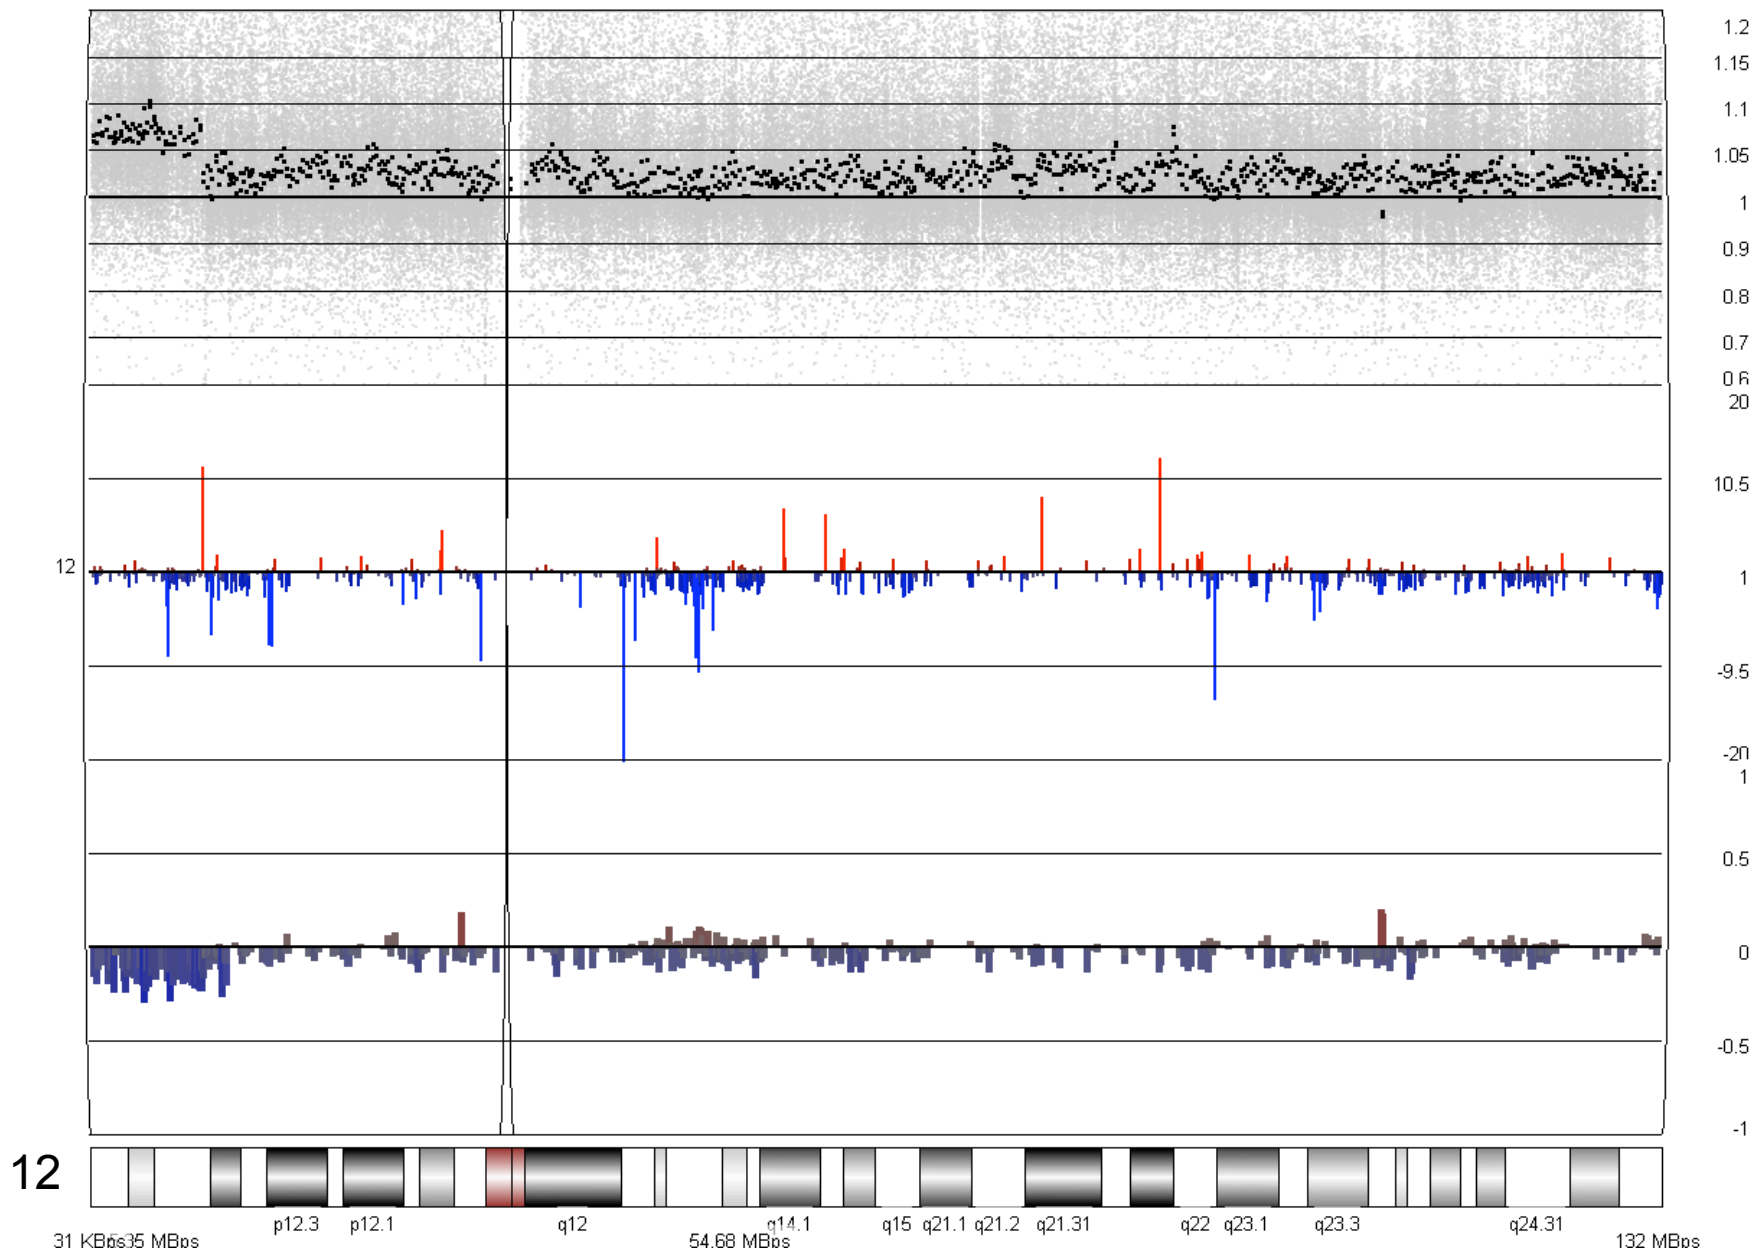

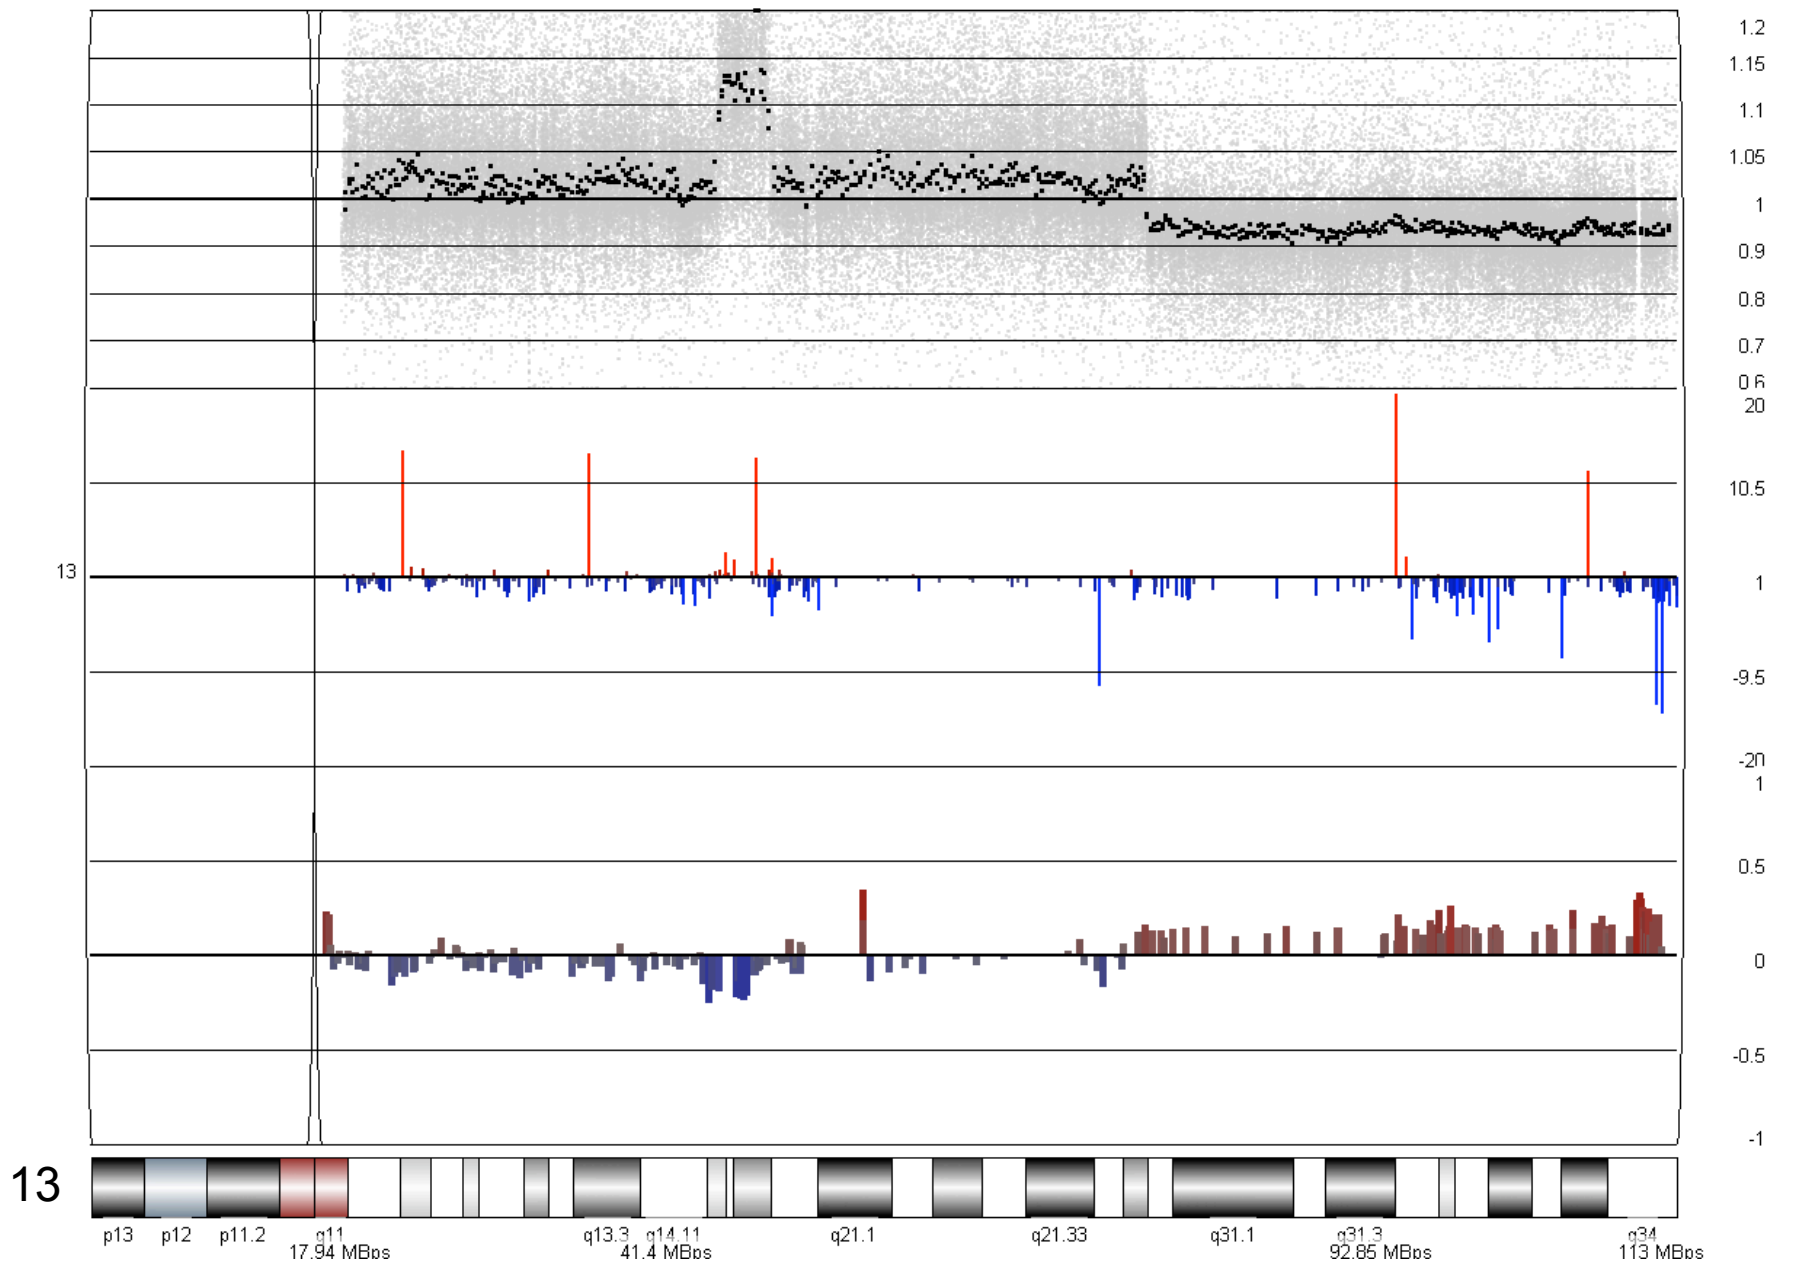

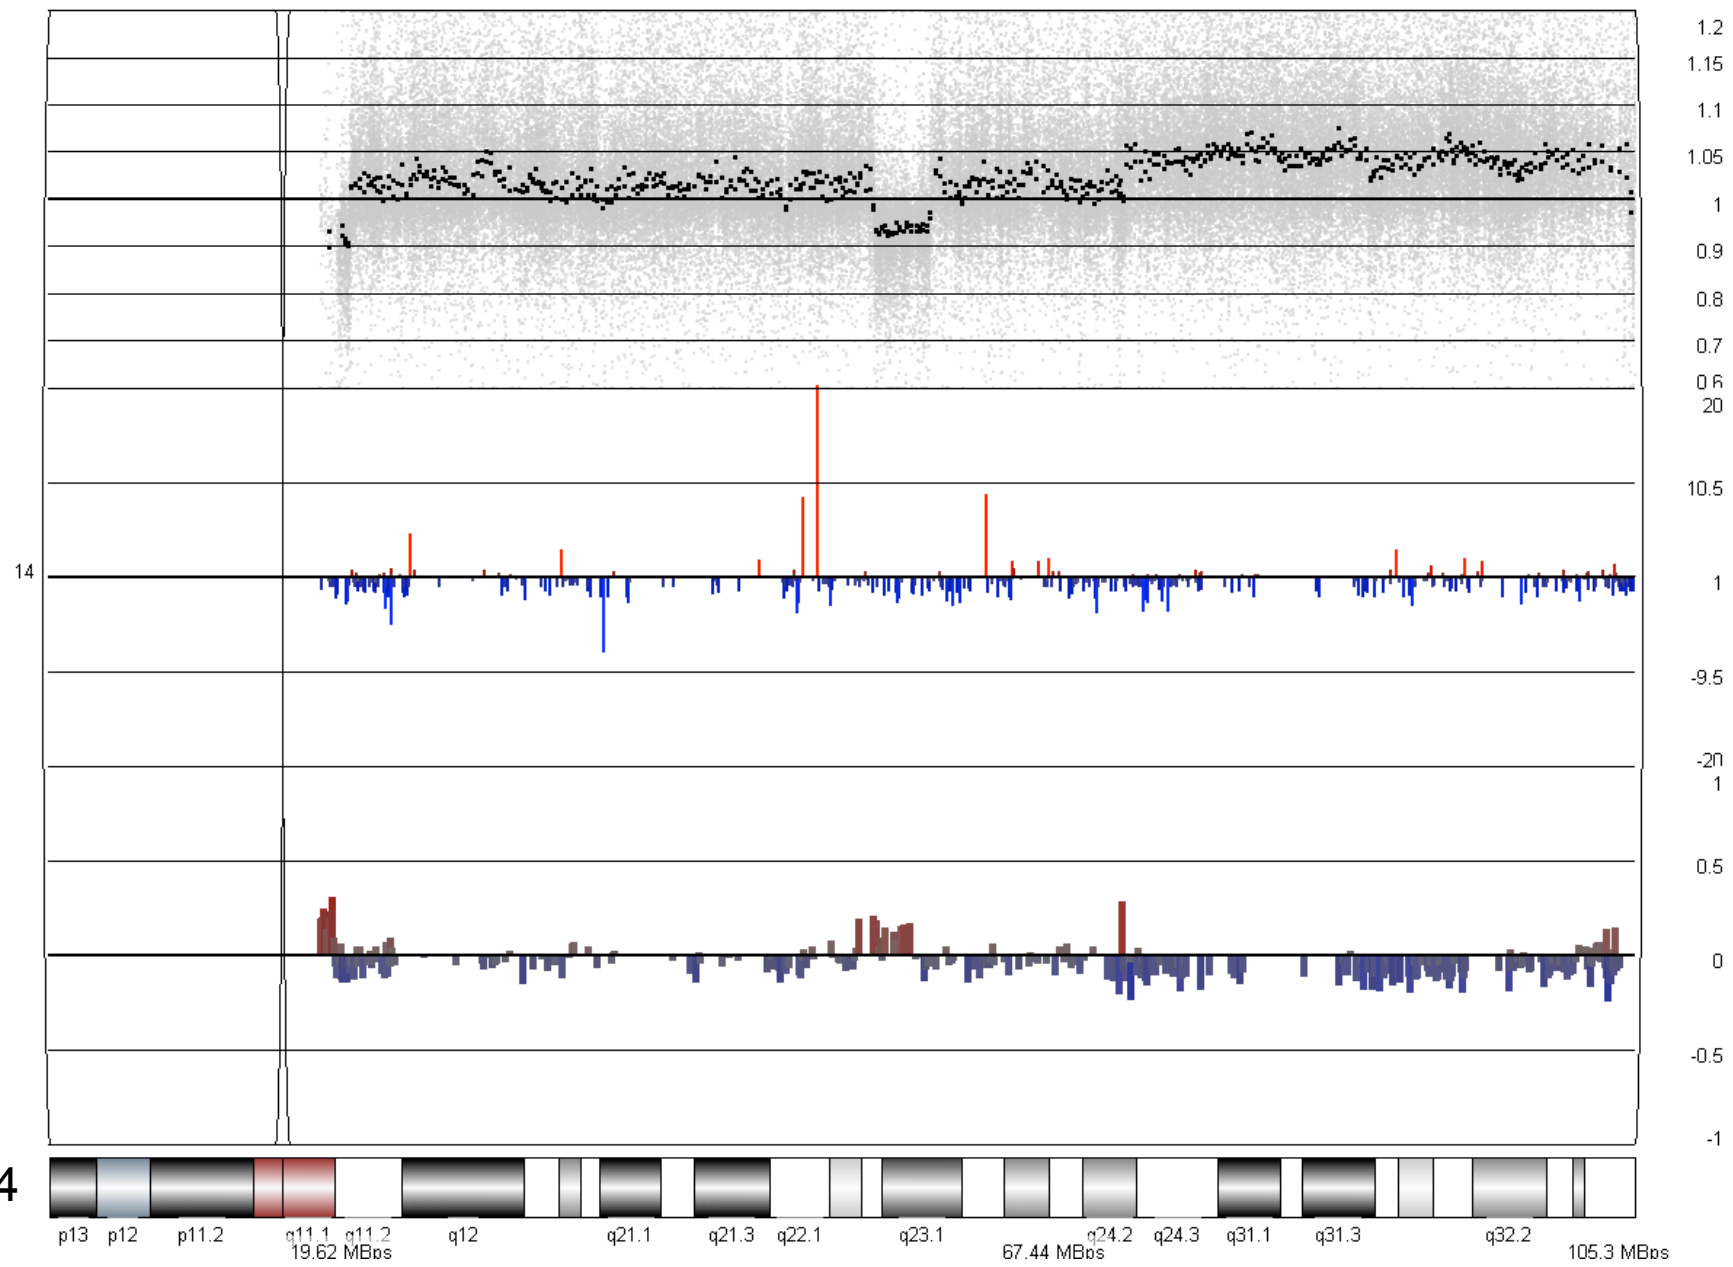

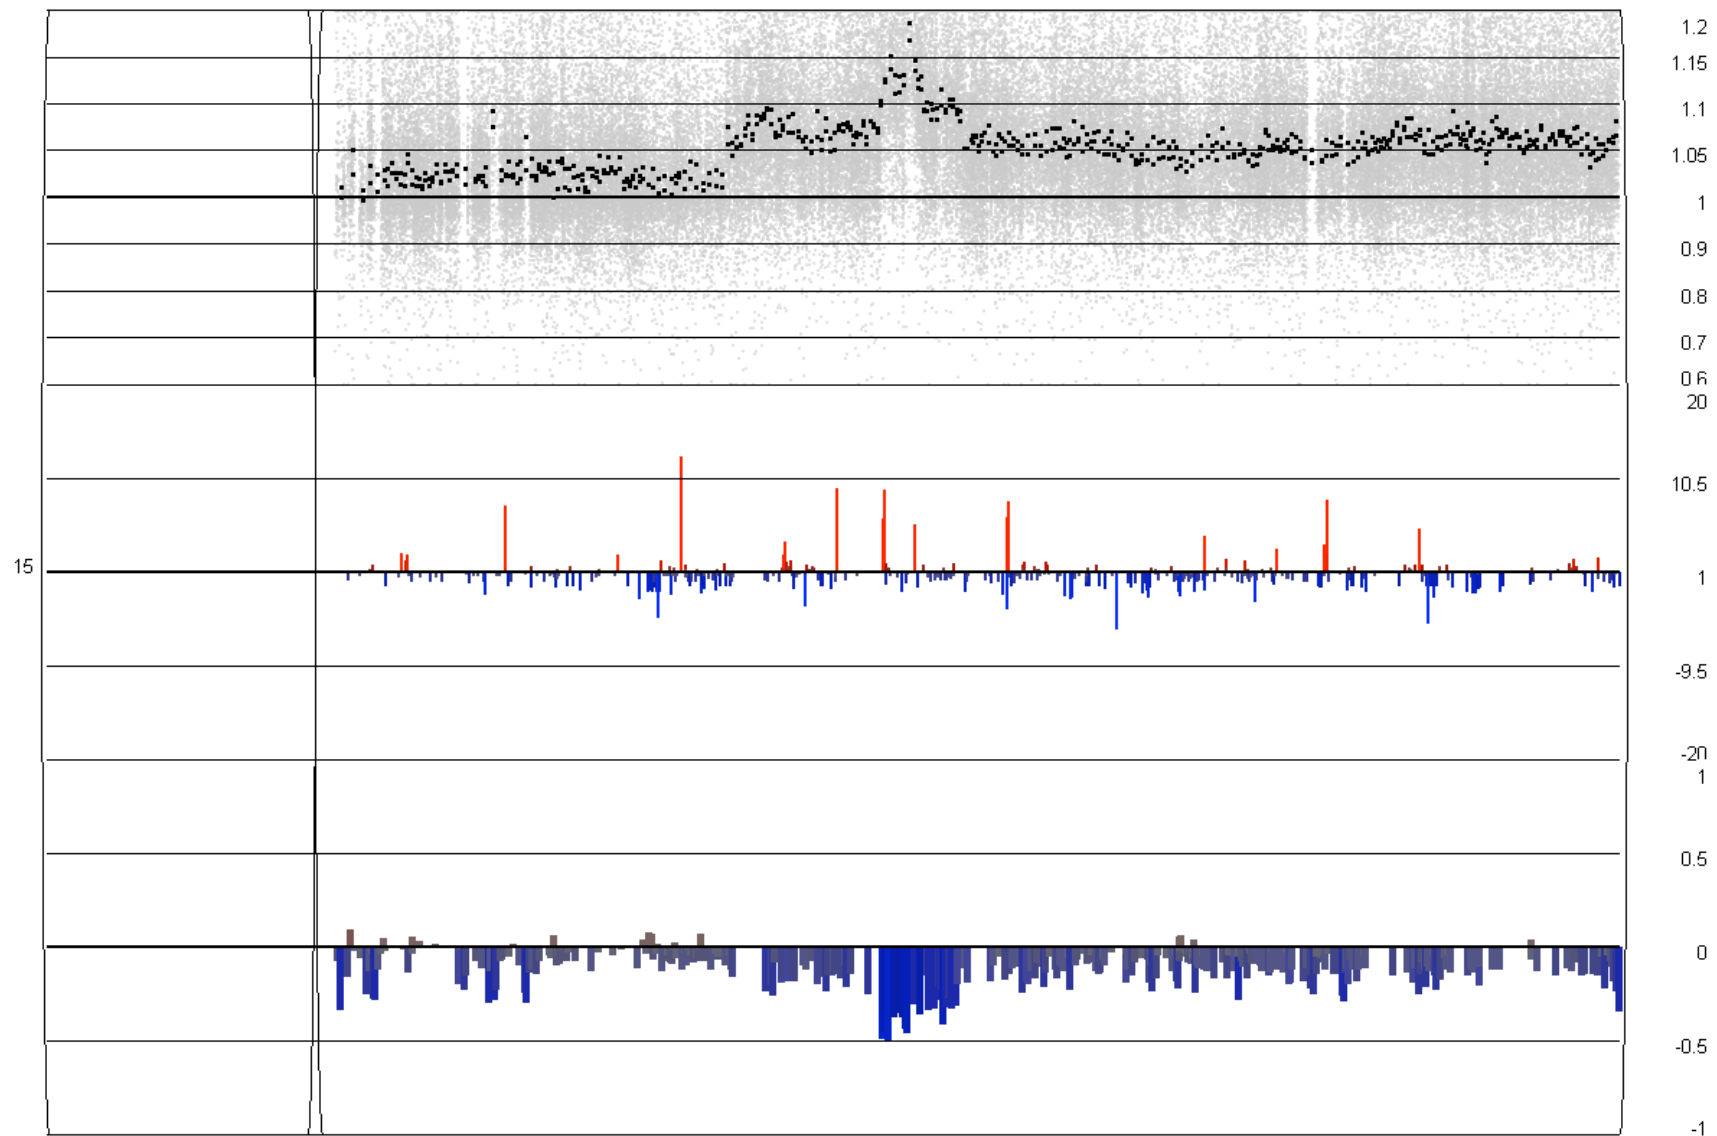

15

p13 p12 p11.2 18.28 MBos q11.2 q12 26.21 MBos q14 q21.1 q21.2 q21.3 q22.2 64.51 MBos q23 q25.1 q25.2 q25.3 q26.1 q26.2 q26.3 100.2 MBos

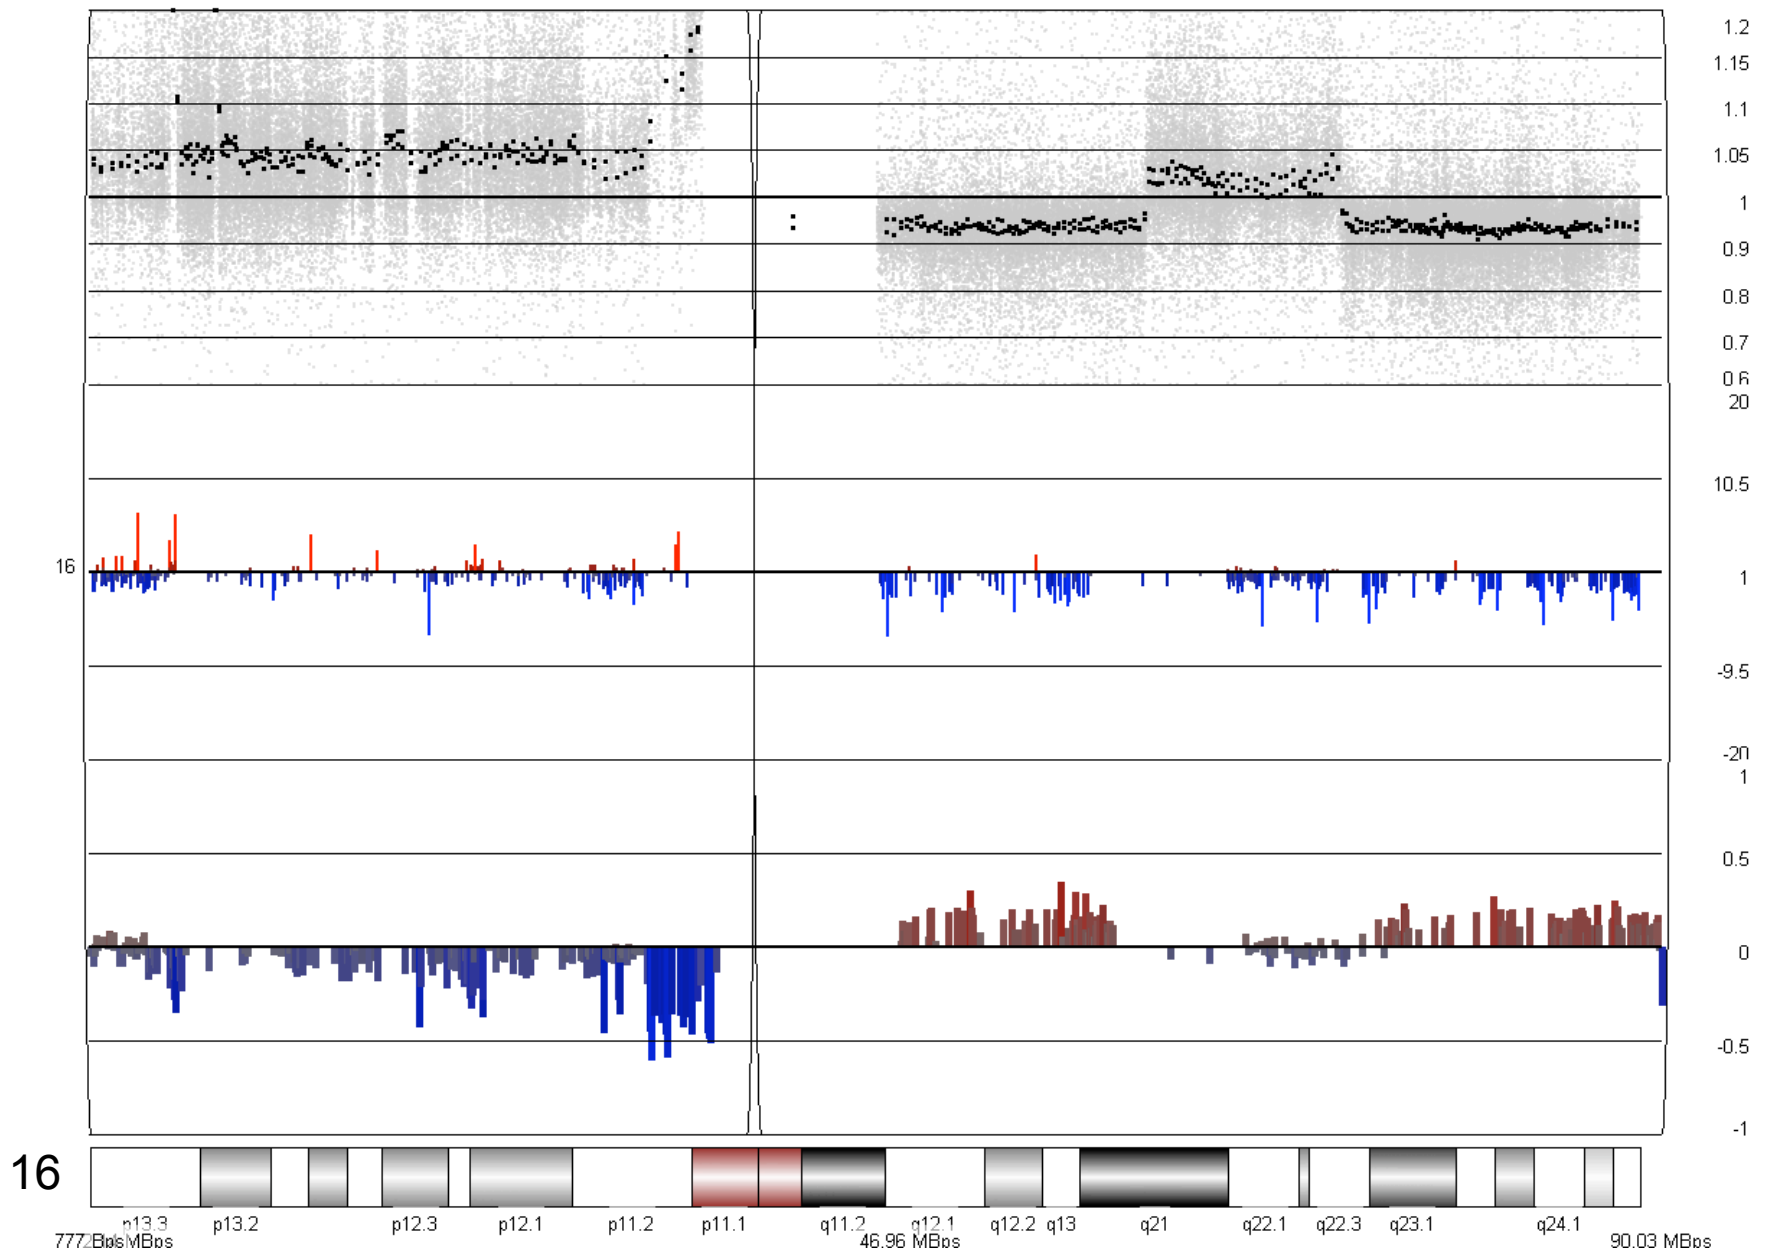



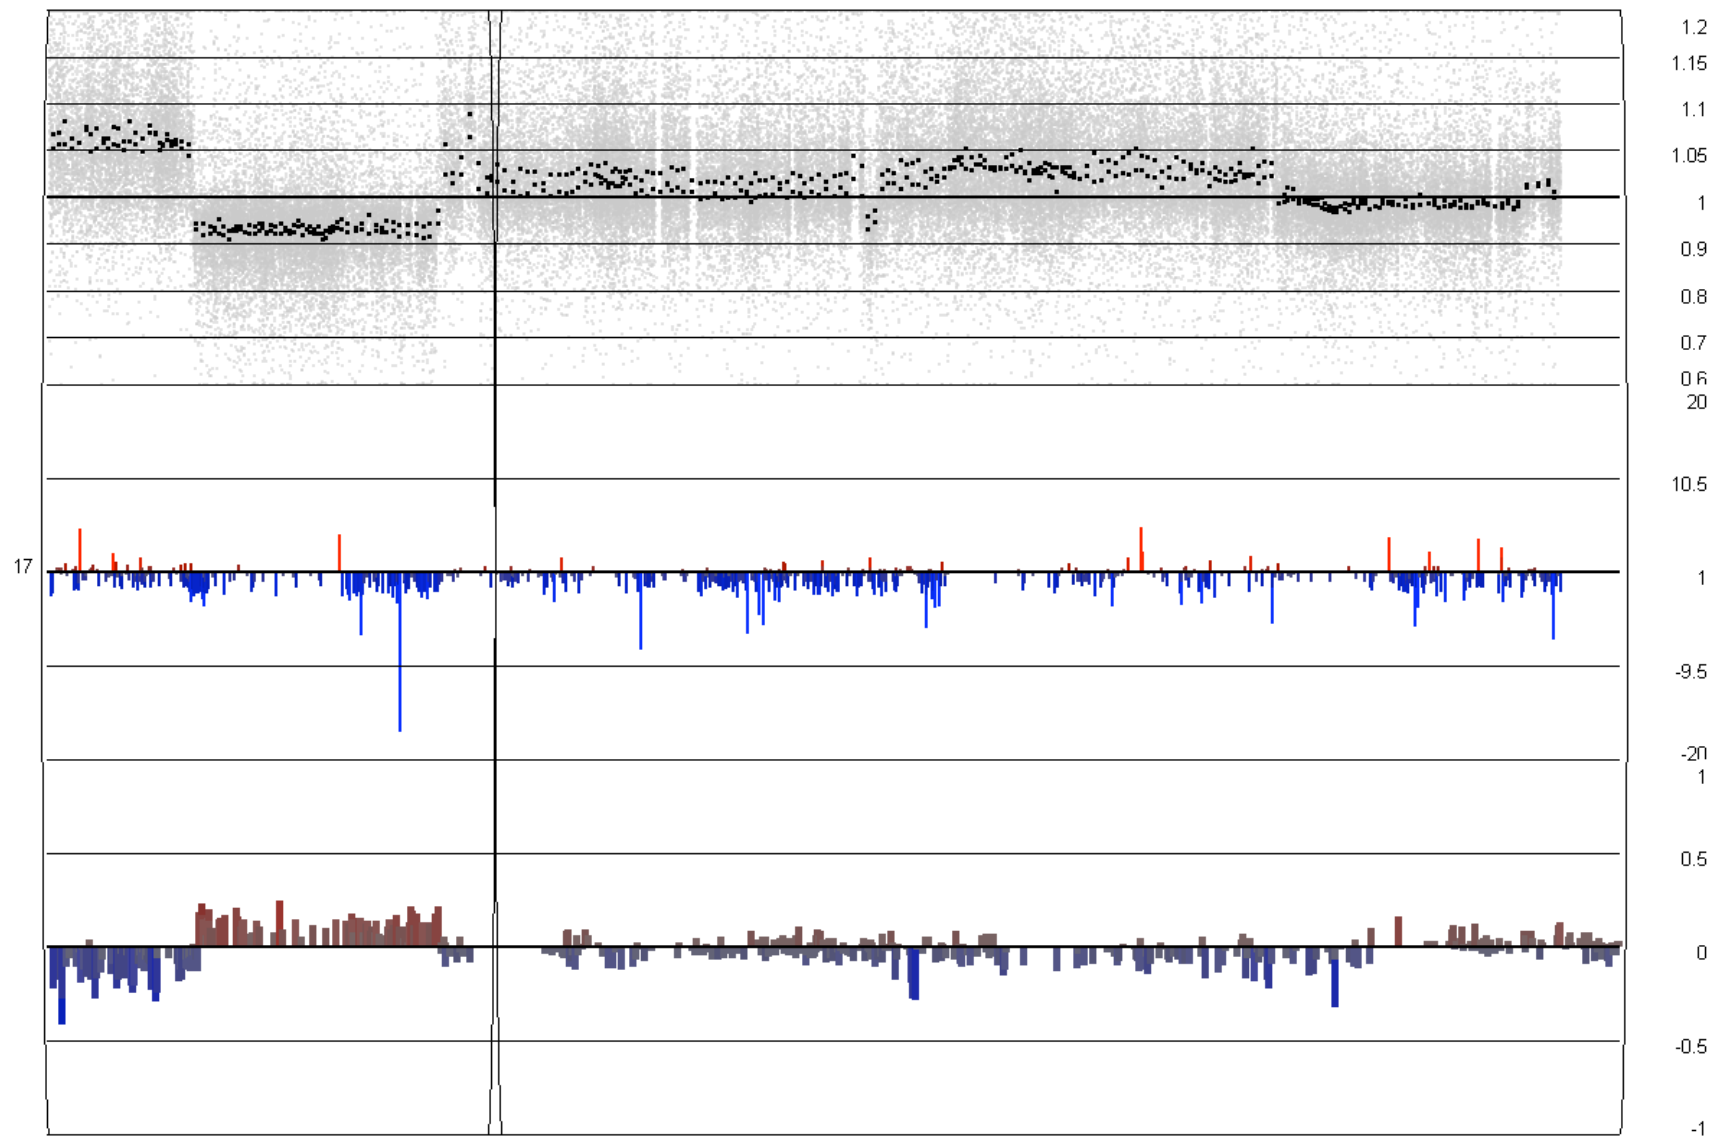

17

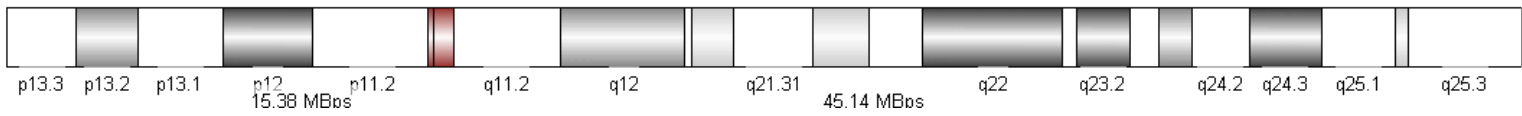

15.38 MBos

45.14 MBos

81.72 MBos

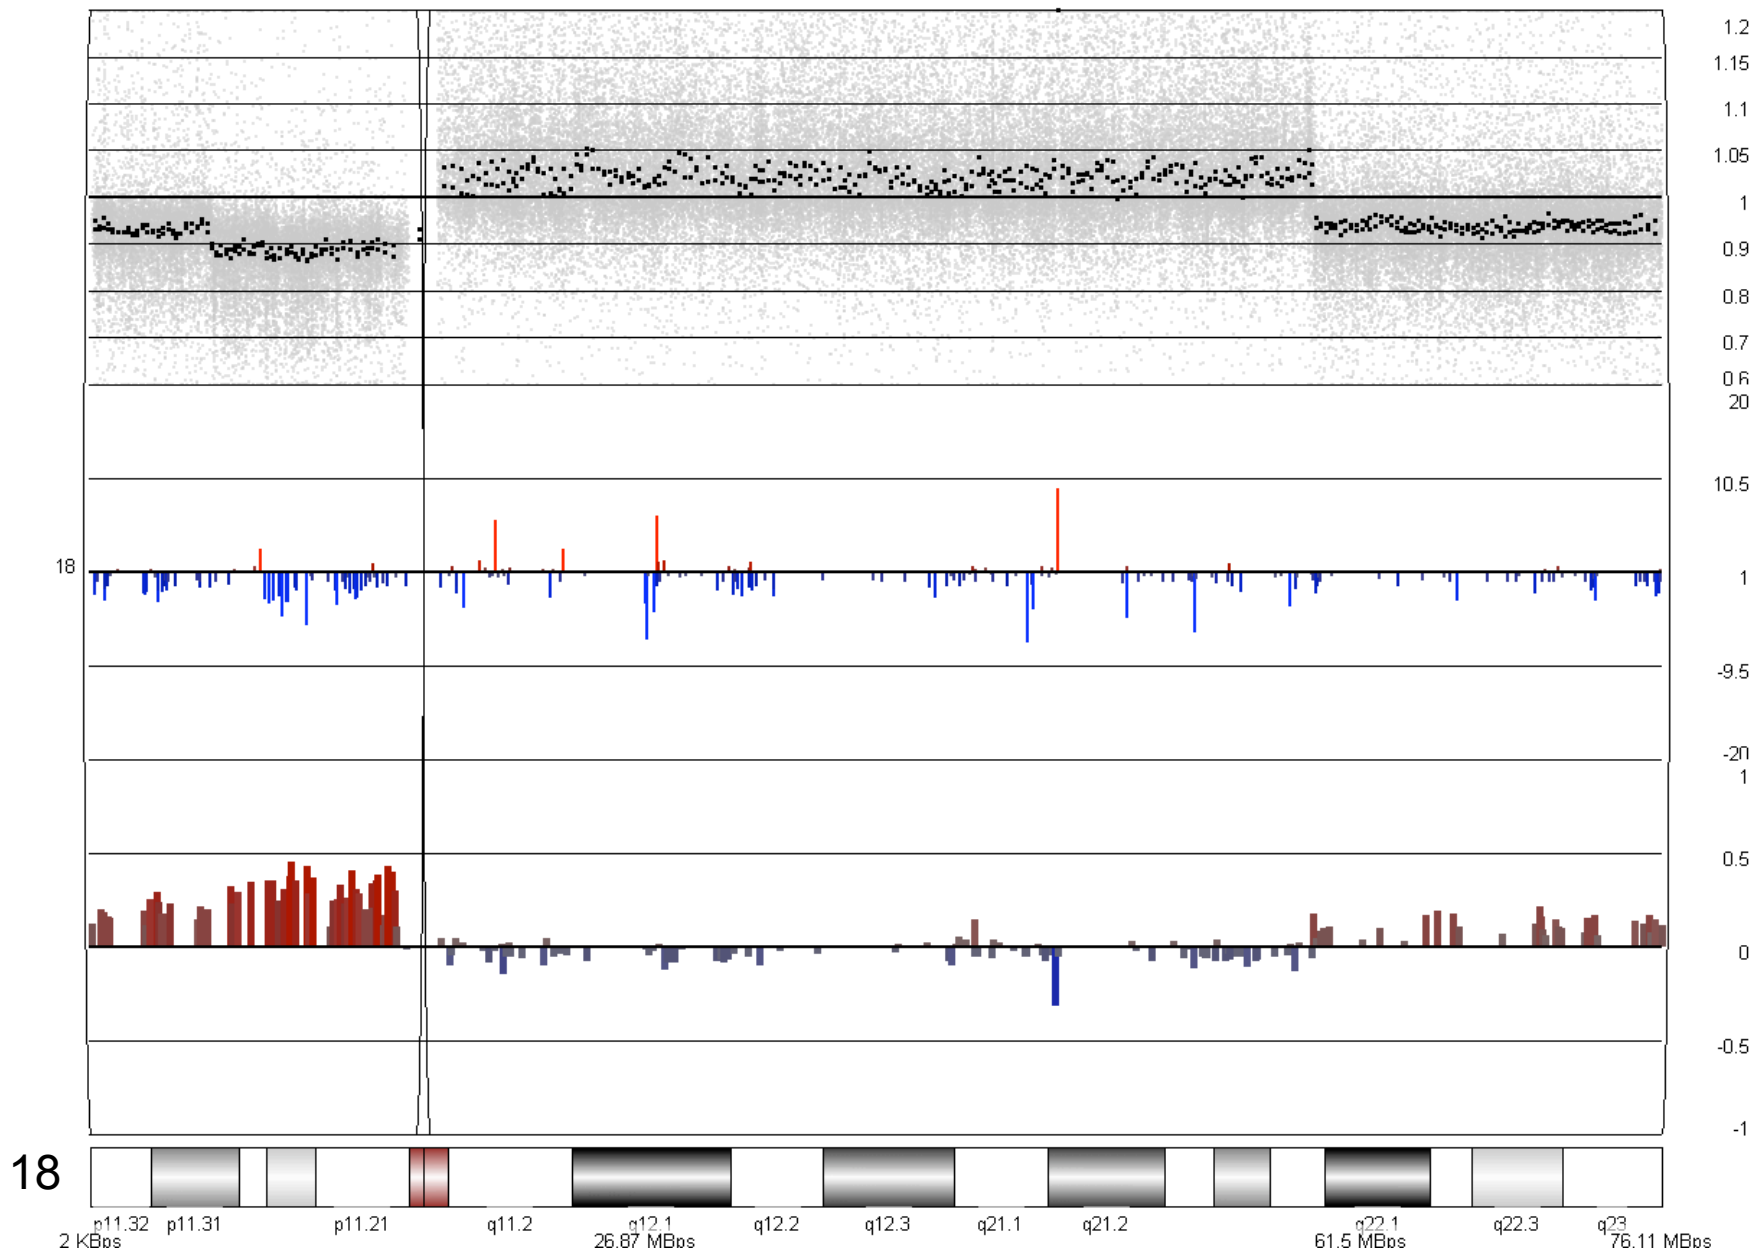

18

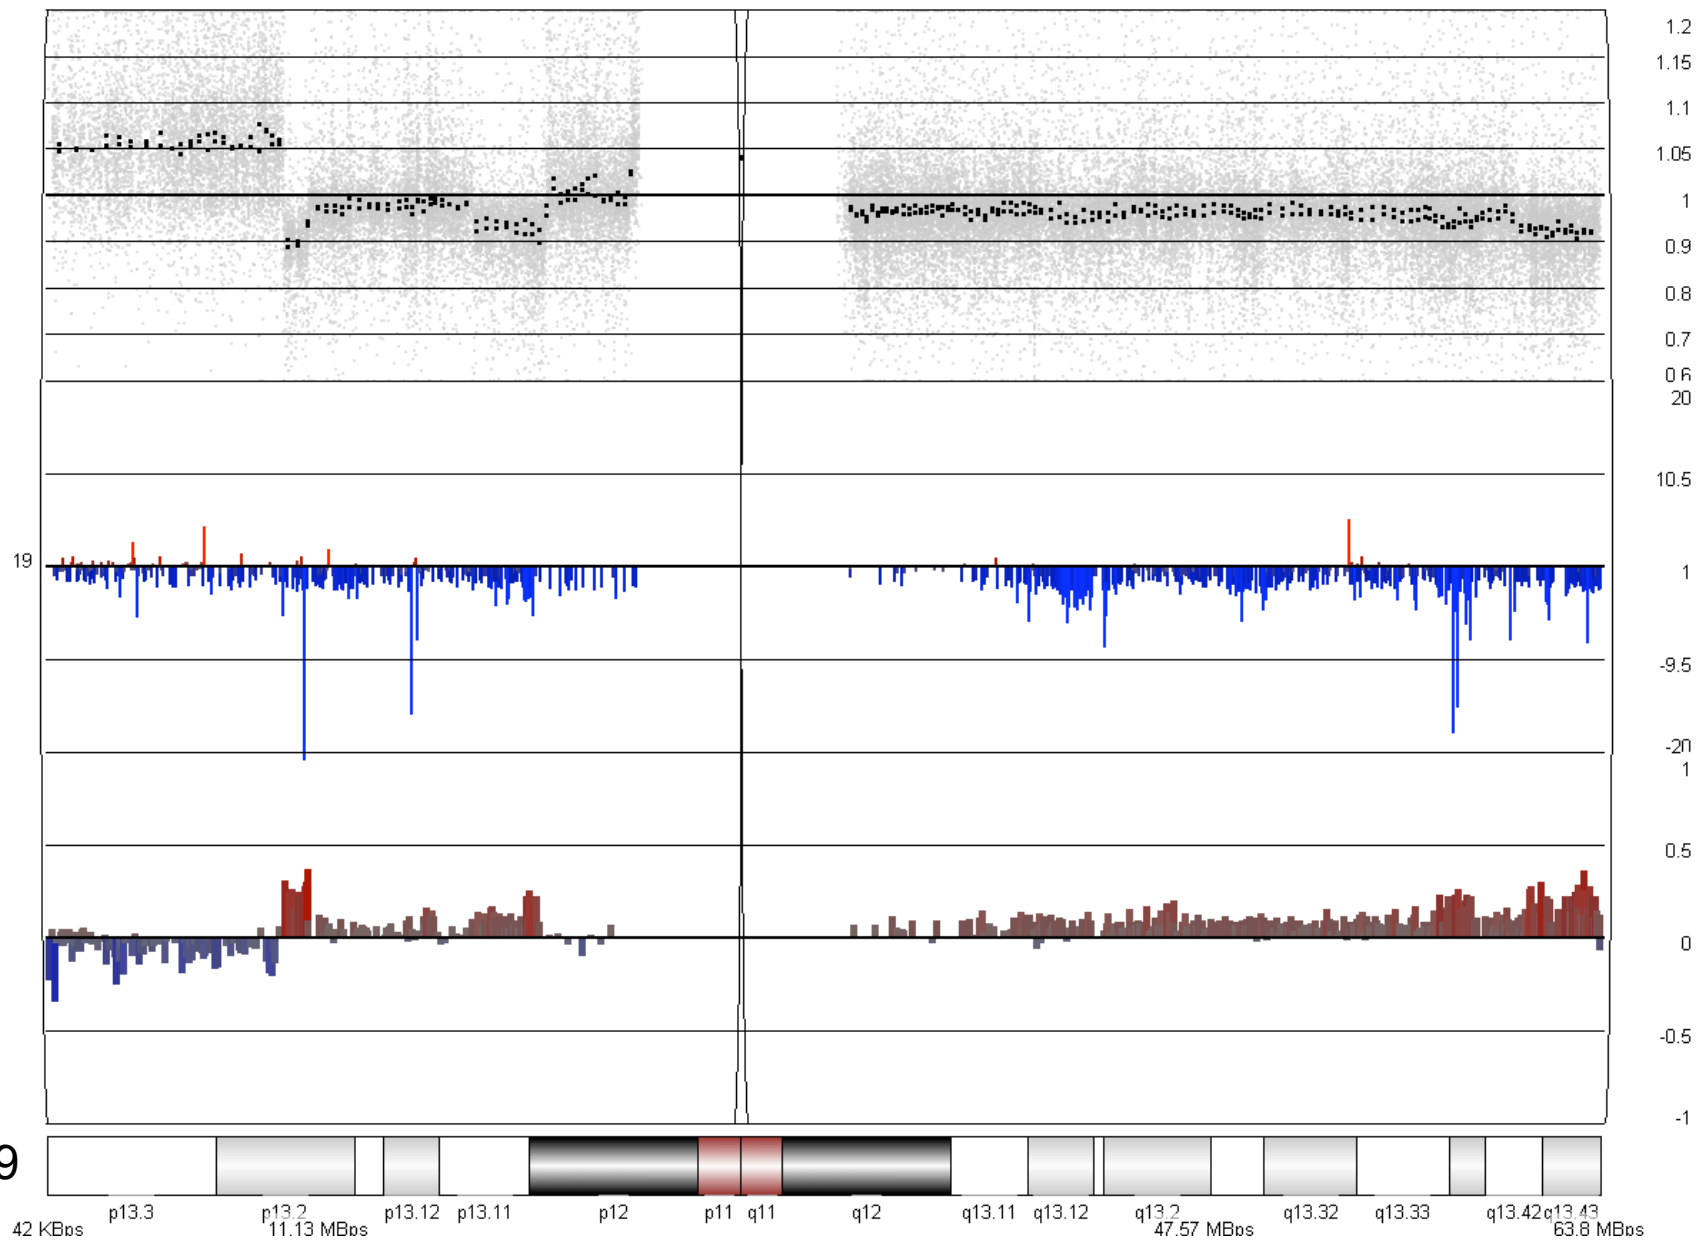

19

42 KBs p13.3 p13.2 11.13 MBs p13.12 p13.11 p12 p11 q11 q12 q13.11 q13.12 q13.2 47.57 MBs q13.32 q13.33 q13.42 q13.43 63.8 MBs

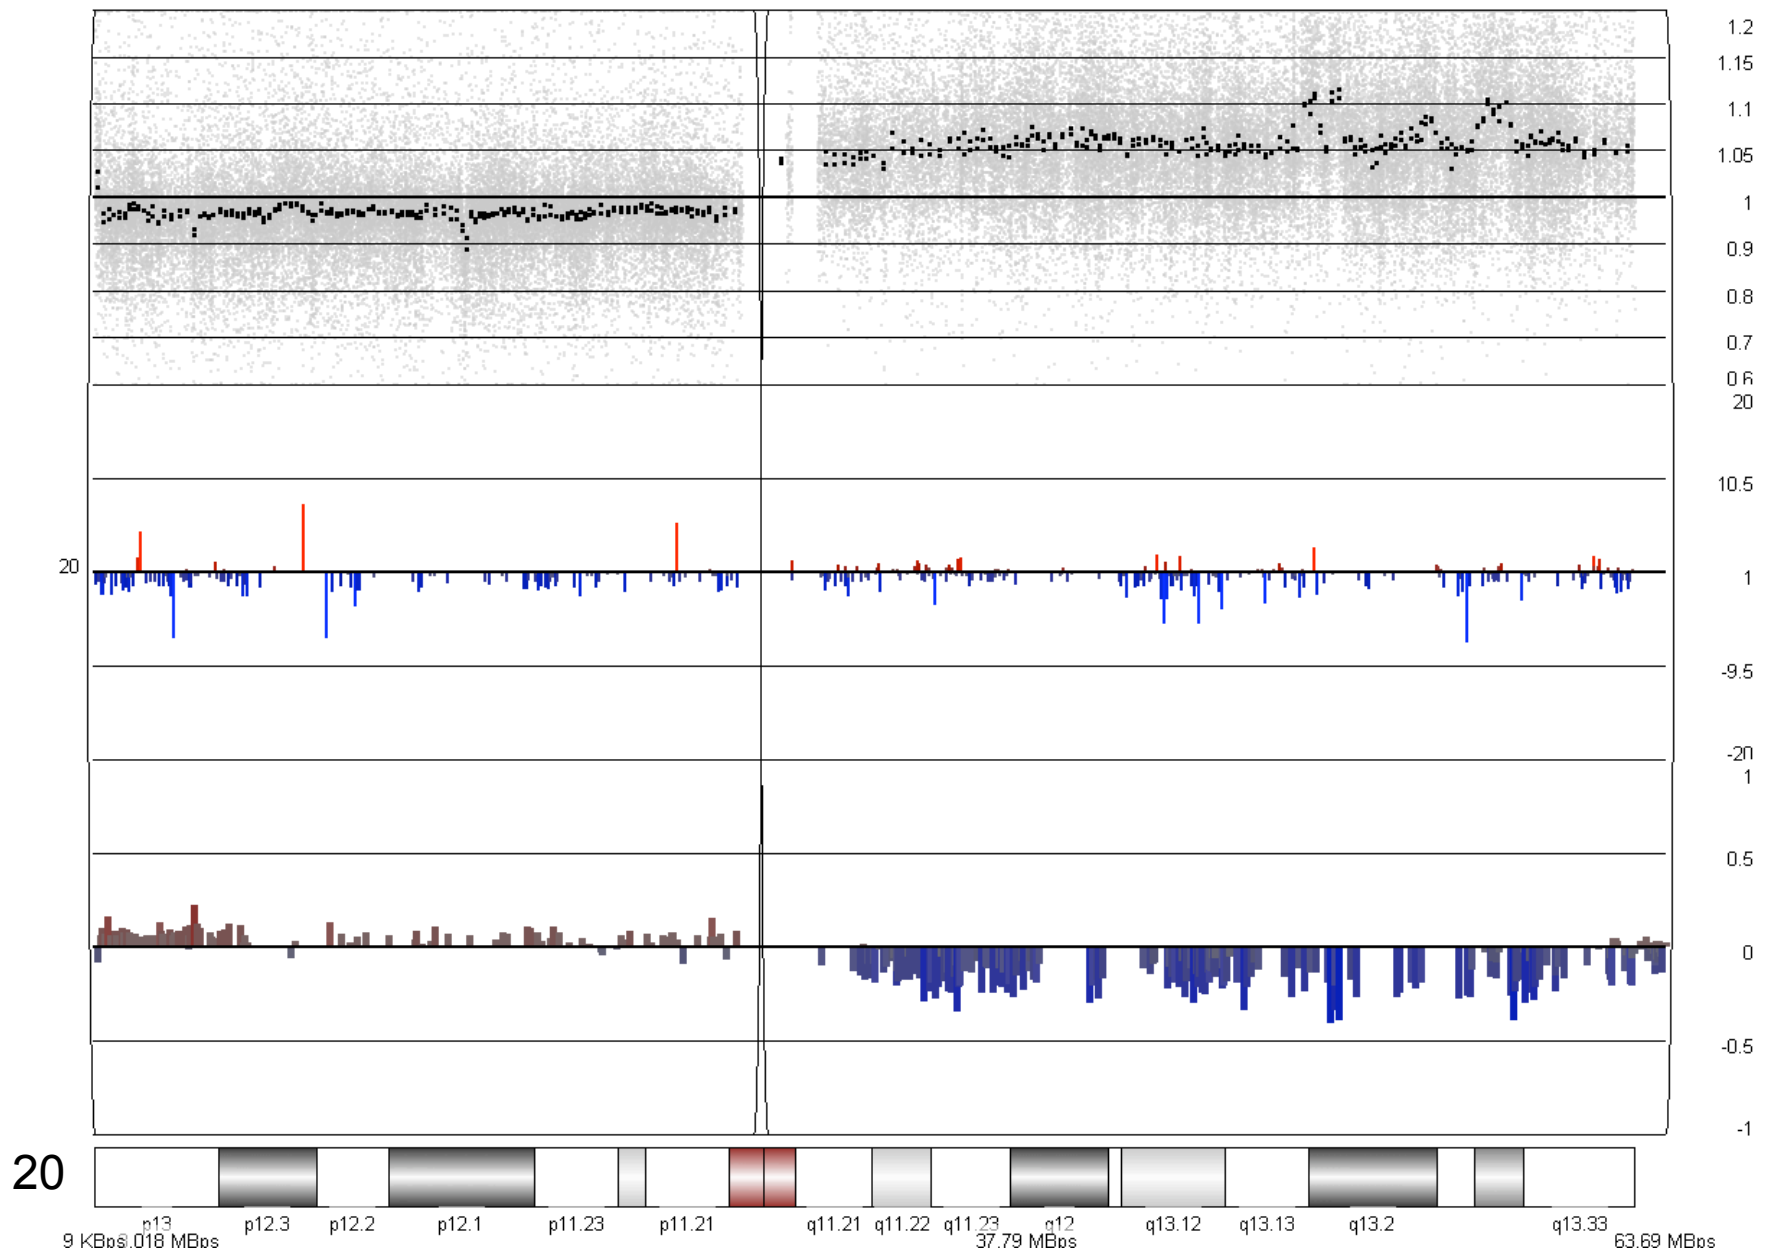

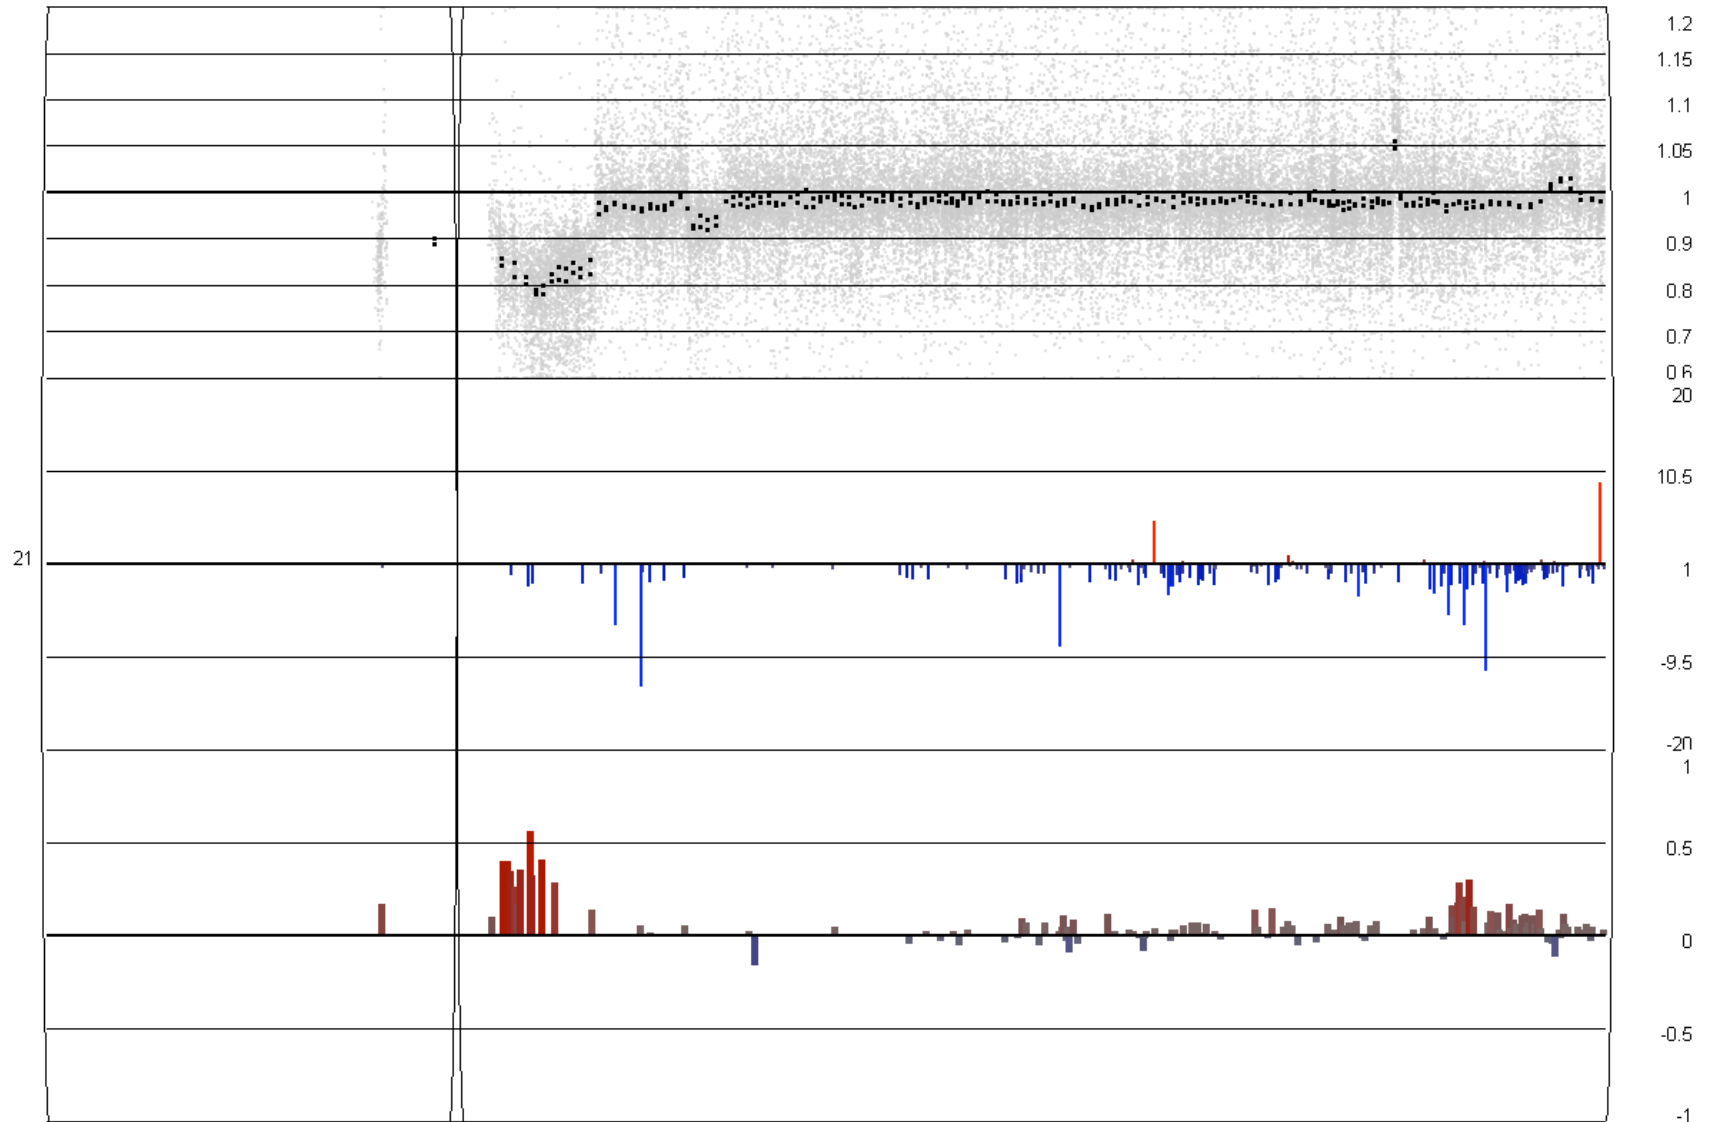

21

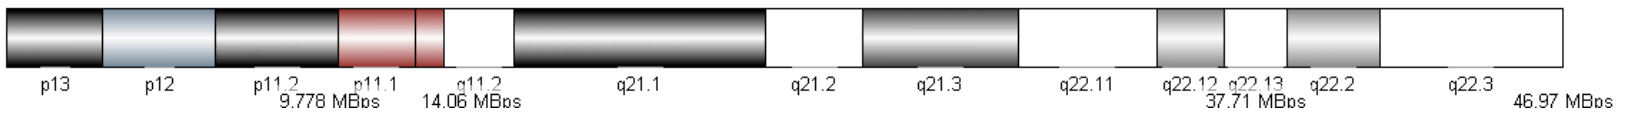

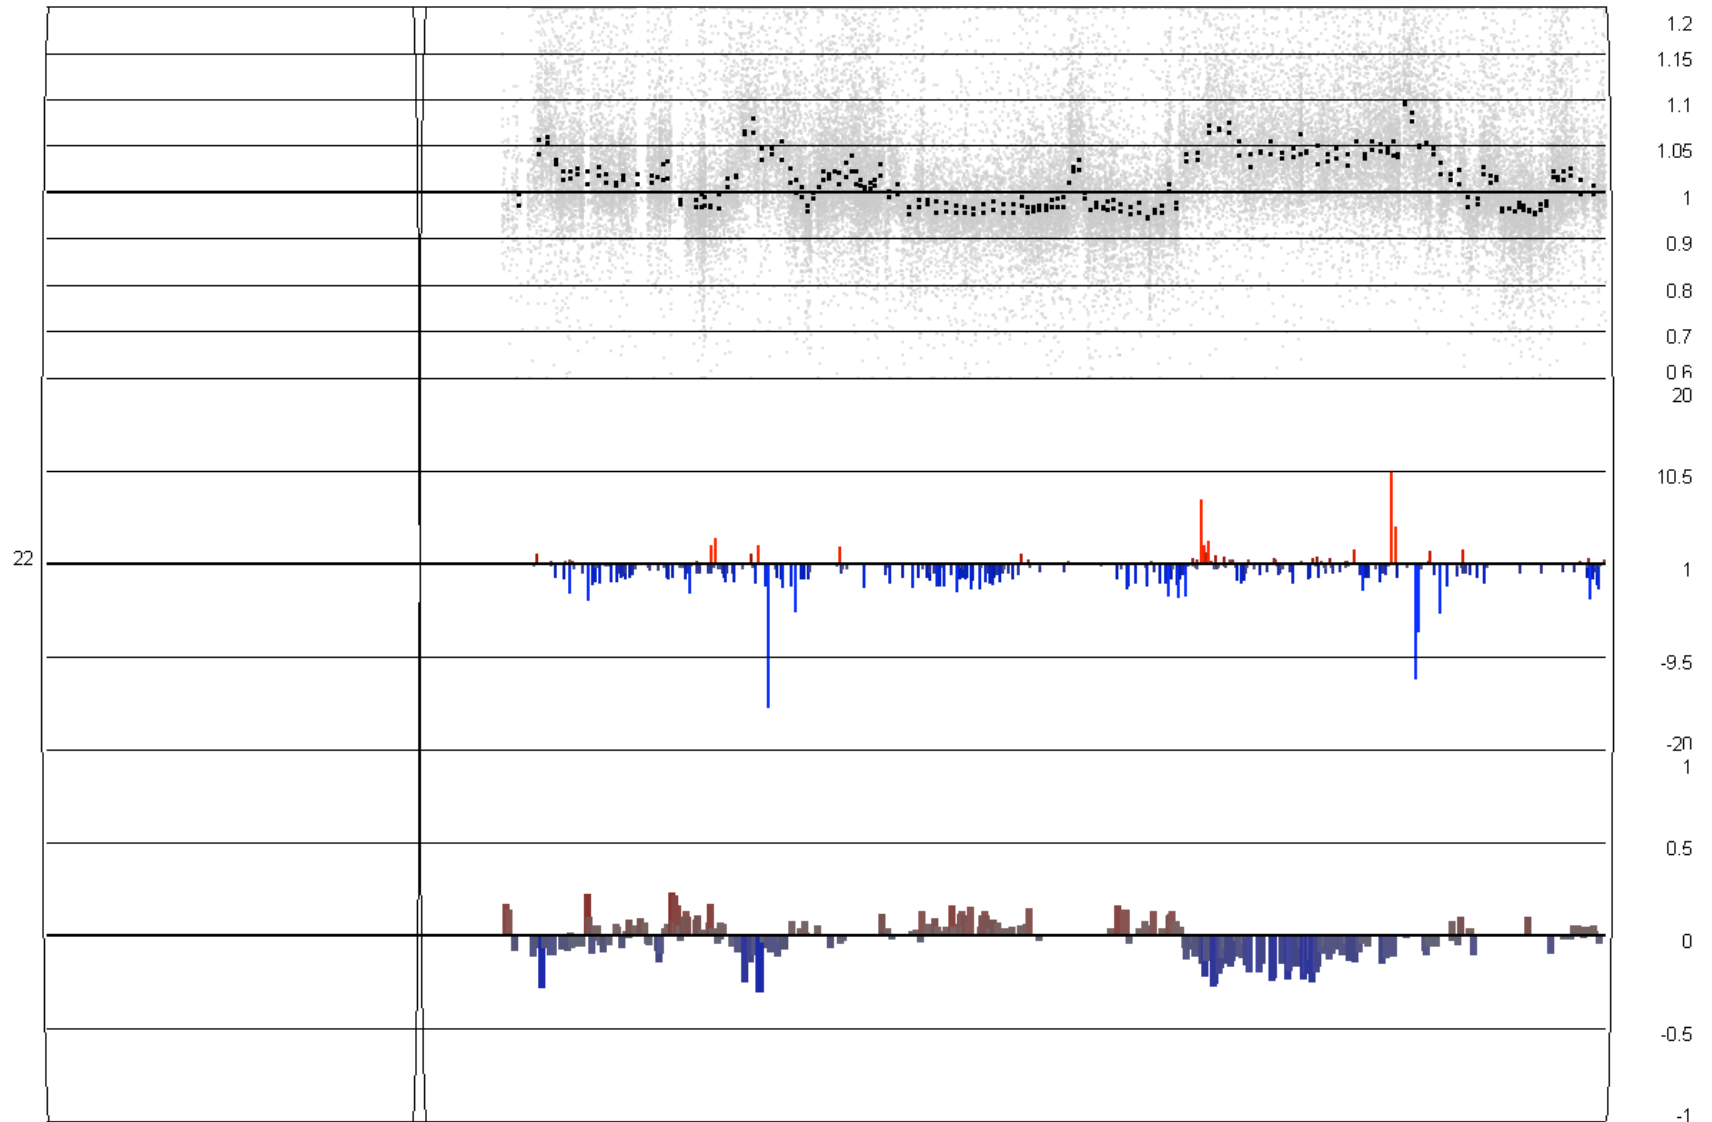

22

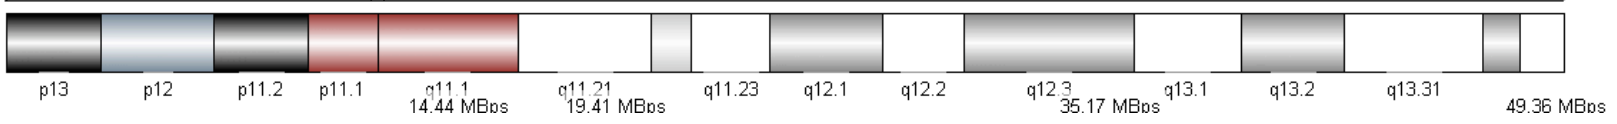

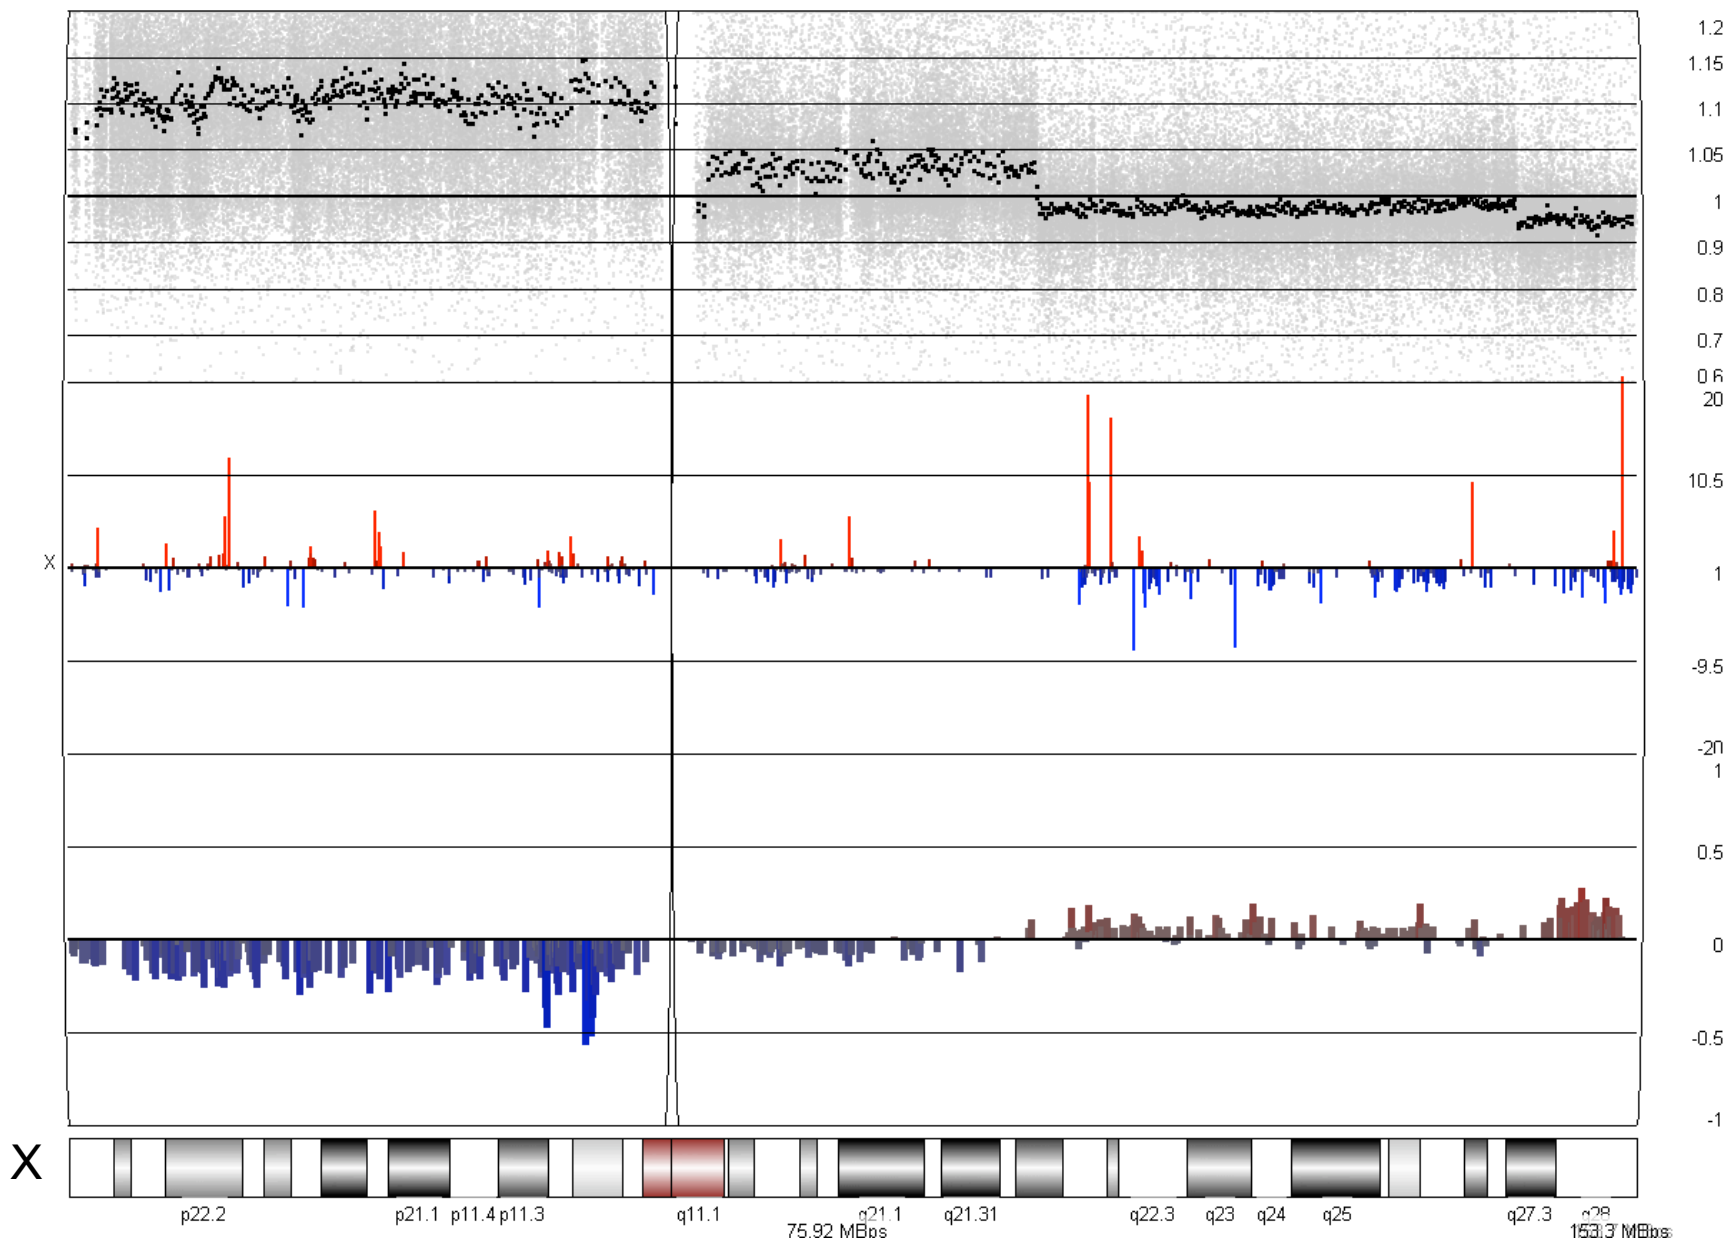

Supplement: pone.0008665.s001.pdf [file pone.0008665.s001.pdf]
