# Supplementary material for: Multi-Platform Whole-Genome Microarray Analyses Refine the Epigenetic Signature of Breast Cancer Metastasis with Gene Expression and Copy Number
Source: PubMed Central journal article supplement (PMC2801616; doi:10.1371/journal.pone.0008665), 2010-01-13
Supplement: pone.0008665.s002.pdf [file pone.0008665.s002.pdf]

**Supplemental Table 1: Primer sets and conditions for PCR.**

| Primer set <sup>1</sup>   | Forward (5'-3')                         | Reverse (5'-3')                   | Annealing Temp (degC) | Expected band size (bp) |
|---------------------------|-----------------------------------------|-----------------------------------|-----------------------|-------------------------|
| <b>HOXD13-BGS</b>         | AGTGGGTGGGTTTAGTTAGGTTG                 | CTCTAACCCCTCTCCCTCTATAA           | 55                    | 245                     |
| <b>HOXD13-QRT</b>         | CGTGGATGCCTTCATTTCTTGAGC                | AGATGACCACAATCCCAGACCCAT          | 60                    | 134                     |
| <b>HOXD13-CNV</b>         | CCTCAGCTAGGTGCTCCG                      | TTGCCACCATTGGCAGG                 | 62                    | 424                     |
| <b>DLC1-BGS</b>           | GTTTTTAGTTAGGATATG                      | ACTTCTTTCTACACTCAAAC              | 55                    | 292                     |
| <b>DLC1-QRT</b>           | AGTGTATGCGTACCTGTGTGCGTT                | TGTGCCAGACTGAATCCACCTT            | 60                    | 193                     |
| <b>DLC1-CNV</b>           | CGTCACCACACTGCAAATAG                    | GACGTGTTTGTTAAGGCATTC             | 62                    | 369                     |
| <b>WNT5A-BGS</b>          | CCA CAT TTG GGG TTG GAA AGC CCT AAT TAC | AAAAA CTC AAT TAA CTT CCA ACA AAA | 55                    | 474                     |
| <b>WNT5A-QRT</b>          | GATCGTTAGCAGCATCAGTCCACA                | CTGTGCCTTCGTGCCTATTTGCAT          | 60                    | 114                     |
| <b>WNT5A-CNV</b>          | GCAATAAACATCTGCTCCTTTC                  | GCATTAATATTGCCGCATC               | 60                    | 269                     |
| <b>TMEM16A-BGS</b>        | TTT TTC TTC CTG TGT TTA AAT TTC TA      | CAAATA TTA ATAATA TAAAC           | 55                    | 468                     |
| <b>TMEM16A-QRT</b>        | TTAAGCAGGAAACAGCACCCCTTG                | TCTGTGAAATGCTTCCGAGGTCA           | 60                    | 170                     |
| <b>TMEM16A-CNV</b>        | ATGTGAGCGCCTCCAAAG                      | AGAACGCCTCCAGGCTC                 | 62                    | 158                     |
| <b>SFN-BGS</b>            | TTGGGTTTGGTTATTTAGTTAAAAGG              | ACATCTCCTTCTACTAATATCCAT          | 55                    | 578                     |
| <b>SFN-QRT</b>            | TGC TGC CTC TGA TCG TAG GAA TTG         | TTC CCT CAA TCT CGG TCT TGC ACT   | 60                    | 103                     |
| <b>SFN-CNV</b>            | GCC TAT AAG AAC GTG GTG GG              | AAT GAT GCG CTT CTT GTC G         | 62                    | 294                     |
| <b>EGFR-BGS</b>           | GATCGGGTTTAGAGGGGTAGTGTGGAAA            | ATCAACTAAACRAAATCAAAAAACC         | 55                    | 511                     |
| <b>EGFR-QRT</b>           | GTGACCGTTTGGGAGTTGATGA                  | GGCTGAGGGAGGCGTTCTC               | 60                    | 103                     |
| <b>EGFR-CNV</b>           | CCTGGACCTTGAGGGATTG                     | CTTCAAGTGAATTCTGCC                | 62                    | 313                     |
| <b>HBB (B-GLOBIN)-CNV</b> | GAGGGTTTGAAGTCCAACCTCTAA                | CAGGGTGAGGTCTAAGTGATGACA          | 62                    | 57                      |
| <b>GAPDH-QRT</b>          | CATGTTTCGTATGGGTGTAACCA                 | ATGGCATGGACTGTGGTCATGAGT          | 60                    | 155                     |

**BGS:** primers for Bisulfite genomic sequencing

**QRT:** primers used for quantitative real time PCR for mRNA abundance

**CNV:** primers used for quantitative real time PCR for copy number analysis
