# Supplementary material for: Multi-Platform Whole-Genome Microarray Analyses Refine the Epigenetic Signature of Breast Cancer Metastasis with Gene Expression and Copy Number
Source: PubMed Central journal article supplement (PMC2801616; doi:10.1371/journal.pone.0008665), 2010-01-13
Supplement: pone.0008665.s003.pdf [file pone.0008665.s003.pdf]

**Supplemental Table 2: Regions showing an increase in copy number, (468GFP-LN relative to 468GFP)**

| #chromosome | region              | length  | average Copy number | # probesets |
|-------------|---------------------|---------|---------------------|-------------|
| 7           | 75704207-75709416   | 5209    | 47.5                | 3           |
| 15          | 54988480-55048156   | 59676   | 39.1                | 28          |
| 7           | 154024104-154030546 | 6442    | 33.6                | 4           |
| 17          | 36769083-36776021   | 6938    | 22.2                | 28          |
| 18          | 46765619-46813542   | 47923   | 21.9                | 32          |
| 16          | 4500302-4933725     | 433423  | 20.0                | 231         |
| 7           | 11674017-11687918   | 13901   | 18.3                | 10          |
| 16          | 7020605-7289951     | 269346  | 16.9                | 395         |
| 22          | 22680529-22726814   | 46285   | 16.8                | 19          |
| 14          | 23515474-23549549   | 34075   | 16.6                | 22          |
| 18          | 46823292-46858328   | 35036   | 14.6                | 104         |
| 16          | 32964249-33149454   | 185205  | 14.6                | 4           |
| 8           | 63380105-63386639   | 6534    | 14.3                | 7           |
| 1           | 22191588-22209830   | 18242   | 14.3                | 10          |
| 13          | 47796160-47854097   | 57937   | 14.1                | 102         |
| 8           | 102689782-102694888 | 5106    | 13.8                | 10          |
| 11          | 661522-682908       | 21386   | 13.4                | 16          |
| 8           | 2067801-2068760     | 959     | 13.2                | 6           |
| 5           | 138164484-138172714 | 8230    | 12.9                | 6           |
| 13          | 47882816-47957722   | 74906   | 12.2                | 79          |
| 7           | 130012614-130450545 | 437931  | 10.8                | 285         |
| 2           | 180128688-180130114 | 1426    | 10.7                | 14          |
| 13          | 47784709-47796149   | 11440   | 10.5                | 10          |
| 7           | 128899812-130010707 | 1110895 | 9.9                 | 526         |
| X           | 71941665-72116832   | 175167  | 9.9                 | 11          |
| X           | 104790819-104791232 | 413     | 9.9                 | 5           |
| 7           | 27663117-27663474   | 357     | 8.4                 | 4           |
| 18          | 46820307-46823139   | 2832    | 8.1                 | 8           |
| 18          | 46815780-46819630   | 3850    | 7.9                 | 13          |
| 3           | 86572955-90419180   | 3846225 | 7.8                 | 2102        |
| 5           | 6665243-6665674     | 431     | 7.8                 | 4           |
| 4           | 20977791-20985949   | 8158    | 7.7                 | 16          |
| 15          | 55054108-55054490   | 382     | 7.3                 | 2           |
| 3           | 84788974-86564578   | 1775604 | 7.2                 | 1042        |
| 5           | 170225838-170512757 | 286919  | 6.6                 | 123         |
| 16          | 32472250-32756399   | 284149  | 6.6                 | 58          |
| 10          | 126434380-126591915 | 157535  | 6.5                 | 69          |
| 5           | 65217734-65506940   | 289206  | 6.4                 | 158         |
| 7           | 38450645-38455163   | 4518    | 6.3                 | 6           |
| 15          | 28173703-28608929   | 435226  | 6.1                 | 112         |
| 1           | 21409134-22097877   | 688743  | 6.0                 | 401         |
| 1           | 3436673-12615712    | 9179039 | 6.0                 | 5642        |
| 1           | 1286515-1867650     | 581135  | 5.9                 | 148         |
| 1           | 13994326-16021930   | 2027604 | 5.9                 | 1587        |
| 1           | 1878053-2930477     | 1052424 | 5.8                 | 303         |
| 1           | 16038248-20970055   | 4931807 | 5.8                 | 3227        |
| 3           | 191536487-193112515 | 1576028 | 5.8                 | 1089        |
| 1           | 22210712-22743899   | 533187  | 5.7                 | 363         |
| 15          | 55057549-55764951   | 707402  | 5.7                 | 536         |
| 18          | 68669215-68670320   | 1105    | 5.6                 | 7           |
| 15          | 53138984-54576939   | 1437955 | 5.5                 | 819         |
| 15          | 54588915-54979351   | 390436  | 5.5                 | 181         |
| 3           | 78799828-79607716   | 807888  | 5.4                 | 409         |
| 3           | 187190536-187932763 | 742227  | 5.3                 | 685         |
| 7           | 95137390-96450494   | 1313104 | 5.3                 | 867         |
| 3           | 73452374-74570462   | 1118088 | 5.3                 | 904         |
| 20          | 48853165-49615192   | 762027  | 5.3                 | 578         |
| 3           | 68831448-70546020   | 1714572 | 5.3                 | 1395        |
| 20          | 50017099-50466370   | 449271  | 5.2                 | 299         |
| 3           | 182373513-184155953 | 1782440 | 5.2                 | 986         |
| 16          | 7018114-7018149     | 35      | 5.0                 | 2           |
| 3           | 74570835-75326887   | 756052  | 4.9                 | 442         |
| 3           | 187933930-190453782 | 2519852 | 4.9                 | 1902        |
| 20          | 48847293-48849109   | 1816    | 4.9                 | 3           |
| 3           | 68171699-68807382   | 635683  | 4.9                 | 469         |
| 3           | 193112683-196192769 | 3080086 | 4.9                 | 2169        |
| 17          | 41750187-42107479   | 357292  | 4.9                 | 52          |
| 3           | 179873655-182373376 | 2499721 | 4.8                 | 1521        |
| 3           | 78733335-78798447   | 65112   | 4.8                 | 48          |
| 3           | 197261608-199380515 | 2118907 | 4.8                 | 1062        |
| 3           | 79610213-79835196   | 224983  | 4.7                 | 145         |
| 3           | 191183987-191536470 | 352483  | 4.7                 | 284         |

|    |                     |          |     |      |
|----|---------------------|----------|-----|------|
| 3  | 184156049-187189164 | 3033115  | 4.7 | 1631 |
| 7  | 96452073-96856682   | 404609   | 4.7 | 228  |
| 3  | 59885745-60087335   | 201590   | 4.7 | 302  |
| 4  | 154192260-155062535 | 870275   | 4.7 | 636  |
| 20 | 56057473-57423860   | 1366387  | 4.7 | 1026 |
| 3  | 79845163-84184912   | 4339749  | 4.6 | 2354 |
| 3  | 190465502-191181438 | 715936   | 4.6 | 565  |
| 3  | 75328509-78733250   | 3404741  | 4.6 | 1978 |
| 3  | 196196720-197260987 | 1064267  | 4.6 | 430  |
| 7  | 92092148-95107736   | 3015588  | 4.5 | 1960 |
| 22 | 43032379-43424682   | 392303   | 4.5 | 270  |
| 13 | 45042209-47784283   | 2742074  | 4.5 | 1924 |
| 13 | 47962809-48760145   | 797336   | 4.5 | 502  |
| 3  | 70680537-73222167   | 2541630  | 4.5 | 1841 |
| 7  | 138994319-141693868 | 2699549  | 4.5 | 1829 |
| 3  | 65043015-68171639   | 3128624  | 4.5 | 2182 |
| 7  | 96857573-97773607   | 916034   | 4.5 | 536  |
| 7  | 143682164-147108692 | 3426528  | 4.4 | 2265 |
| 3  | 177695202-179873152 | 2177950  | 4.4 | 1335 |
| X  | 26727046-27957653   | 1230607  | 4.3 | 813  |
| X  | 46178486-55533764   | 9355278  | 4.3 | 3983 |
| 9  | 30910-1520000       | 1489090  | 4.2 | 1659 |
| X  | 24202309-26709573   | 2507264  | 4.2 | 1545 |
| 15 | 55769853-58299409   | 2529556  | 4.2 | 1892 |
| 7  | 141699450-142154515 | 455065   | 4.2 | 412  |
| 1  | 45726572-45976083   | 249511   | 4.2 | 97   |
| X  | 9290675-17095515    | 7804840  | 4.2 | 5522 |
| X  | 17097014-22481252   | 5384238  | 4.2 | 3018 |
| 7  | 142176272-143542557 | 1366285  | 4.2 | 868  |
| 15 | 30226573-30691968   | 465395   | 4.2 | 79   |
| 20 | 53805479-54321002   | 515523   | 4.2 | 427  |
| 13 | 47854202-47882733   | 28531    | 4.1 | 20   |
| X  | 27959744-42078035   | 14118291 | 4.1 | 8994 |
| 5  | 56694759-57036303   | 341544   | 4.1 | 253  |
| X  | 1917029-7543877     | 5626848  | 4.1 | 3911 |
| 1  | 26920933-31915725   | 4994792  | 4.1 | 2710 |
| 14 | 36306662-36352544   | 45882    | 4.1 | 56   |
| 5  | 58060726-61532033   | 3471307  | 4.1 | 2300 |
| X  | 42089168-45408106   | 3318938  | 4.0 | 1805 |
| 8  | 132832538-133319203 | 486665   | 4.0 | 374  |
| 12 | 4911842-5395474     | 483632   | 4.0 | 491  |
| 5  | 82508048-83236914   | 728866   | 4.0 | 425  |
| 8  | 136613731-137615008 | 1001277  | 4.0 | 777  |
| 10 | 127884570-129160888 | 1276318  | 3.9 | 1023 |
| X  | 23194174-24200150   | 1005976  | 3.9 | 678  |
| 22 | 21976553-22426783   | 450230   | 3.9 | 279  |
| 7  | 121318047-124783194 | 3465147  | 3.9 | 2057 |
| 10 | 127810968-127880313 | 69345    | 3.8 | 97   |
| 7  | 116190822-117809597 | 1618775  | 3.8 | 954  |
| X  | 55534964-58319626   | 2784662  | 3.8 | 1369 |
| 7  | 106425024-108163417 | 1738393  | 3.8 | 1080 |
| 5  | 83237952-83304907   | 66955    | 3.8 | 54   |
| 10 | 108466837-109505540 | 1038703  | 3.8 | 843  |
| 7  | 83802374-85198094   | 1395720  | 3.8 | 818  |
| 8  | 136049738-136609910 | 560172   | 3.8 | 388  |
| 7  | 135872372-137076595 | 1204223  | 3.8 | 811  |
| 7  | 102139083-105364036 | 3224953  | 3.8 | 2069 |
| 12 | 91019006-91185828   | 166822   | 3.7 | 117  |
| X  | 7544067-9290510     | 1746443  | 3.7 | 1358 |
| 7  | 91764443-92091908   | 327465   | 3.7 | 176  |
| 10 | 117702957-119000175 | 1297218  | 3.7 | 936  |
| 7  | 120013114-121317792 | 1304678  | 3.7 | 851  |
| 7  | 138974507-138993906 | 19399    | 3.7 | 15   |
| X  | 108477-1894383      | 1785906  | 3.7 | 265  |
| X  | 22492554-23193660   | 701106   | 3.7 | 618  |
| 12 | 5395521-5646508     | 250987   | 3.7 | 243  |
| 8  | 133321381-134650462 | 1329081  | 3.6 | 1183 |
| 10 | 129161079-129366465 | 205386   | 3.6 | 167  |
| 22 | 22426890-22660218   | 233328   | 3.6 | 154  |
| 7  | 147111995-147131735 | 19740    | 3.6 | 9    |
| 10 | 134570505-135356694 | 786189   | 3.6 | 336  |
| 5  | 61535707-63757272   | 2221565  | 3.6 | 1239 |
| 7  | 117810095-120012951 | 2202856  | 3.6 | 1214 |
| 7  | 108164312-109214872 | 1050560  | 3.6 | 680  |
| 7  | 124801133-128899323 | 4098190  | 3.6 | 2597 |
| 7  | 147132559-147649475 | 516916   | 3.6 | 434  |
| 7  | 97774291-97781659   | 7368     | 3.6 | 6    |

|    |                     |          |     |       |
|----|---------------------|----------|-----|-------|
| 10 | 105742493-108466097 | 2723604  | 3.5 | 2069  |
| 12 | 20703-4902901       | 4882198  | 3.5 | 3489  |
| 5  | 77834914-82497833   | 4662919  | 3.5 | 2907  |
| 3  | 60087399-65041681   | 4954282  | 3.5 | 4406  |
| 7  | 130457966-135870490 | 5412524  | 3.5 | 3838  |
| 20 | 57492868-62384265   | 4891397  | 3.5 | 3128  |
| 7  | 75711830-83800312   | 8088482  | 3.5 | 5511  |
| 5  | 55467361-56694137   | 1226776  | 3.5 | 916   |
| 10 | 126599637-127808232 | 1208595  | 3.5 | 853   |
| 7  | 109241465-116190739 | 6949274  | 3.5 | 4318  |
| 8  | 138231733-146268959 | 8037226  | 3.5 | 4870  |
| 10 | 132136144-132877123 | 740979   | 3.5 | 703   |
| 5  | 54518564-55462146   | 943582   | 3.5 | 482   |
| 10 | 109507892-117700285 | 8192393  | 3.5 | 5746  |
| 8  | 134655412-136049429 | 1394017  | 3.5 | 1214  |
| 8  | 127956222-132625360 | 4669138  | 3.5 | 3405  |
| 7  | 154031950-158810207 | 4778257  | 3.5 | 3269  |
| 5  | 58005107-58060653   | 55546    | 3.5 | 37    |
| 3  | 49418085-59884355   | 10466270 | 3.5 | 6379  |
| 5  | 63760791-65215536   | 1454745  | 3.5 | 865   |
| 7  | 85199012-91764216   | 6565204  | 3.5 | 4086  |
| 7  | 105365127-106422804 | 1057677  | 3.5 | 773   |
| 5  | 49596050-54514773   | 4918723  | 3.4 | 3200  |
| 10 | 119003578-126426756 | 7423178  | 3.4 | 5768  |
| 10 | 100019596-105738745 | 5719149  | 3.4 | 3146  |
| 20 | 49616647-50015682   | 399035   | 3.4 | 295   |
| 10 | 129366515-132130439 | 2763924  | 3.4 | 2240  |
| 5  | 65508746-77834188   | 12325442 | 3.4 | 7107  |
| 20 | 28103258-48842911   | 20739653 | 3.4 | 12661 |
| 17 | 21506946-22142010   | 635064   | 3.4 | 228   |
| 15 | 51735154-53138983   | 1403829  | 3.4 | 1106  |
| 5  | 83305251-83971611   | 666360   | 3.4 | 342   |
| 20 | 54338133-55996422   | 1658289  | 3.4 | 1366  |
| 15 | 43147386-51731473   | 8584087  | 3.4 | 5561  |
| 11 | 90620872-95331300   | 4710428  | 3.4 | 3427  |
| 8  | 42979170-53812620   | 10833450 | 3.4 | 3987  |
| 7  | 97782124-102136421  | 4354297  | 3.4 | 1825  |
| 8  | 53815958-63375932   | 9559974  | 3.4 | 6463  |
| 7  | 151429049-154020828 | 2591779  | 3.4 | 1674  |
| 17 | 526-7515695         | 7515169  | 3.4 | 4323  |
| 20 | 50466864-51242945   | 776081   | 3.4 | 634   |
| 15 | 88850762-90257901   | 1407139  | 3.3 | 995   |
| 20 | 51245861-53689470   | 2443609  | 3.3 | 2034  |
| 7  | 137079626-138971429 | 1891803  | 3.3 | 1100  |
| 10 | 36350756-39114827   | 2764071  | 3.3 | 1566  |
| 12 | 5646821-9423684     | 3776863  | 3.3 | 2048  |
| 8  | 63391700-99756416   | 36364716 | 3.3 | 22034 |
| 10 | 17678316-36346833   | 18668517 | 3.3 | 13036 |
| 7  | 64930393-75701960   | 10771567 | 3.3 | 5060  |
| 8  | 106057243-115930962 | 9873719  | 3.3 | 5880  |
| 6  | 168078127-168338768 | 260641   | 3.3 | 180   |
| 3  | 154233326-159195650 | 4962324  | 3.3 | 2992  |
| 8  | 115937583-127953830 | 12016247 | 3.3 | 8334  |
| 3  | 164111308-171934281 | 7822973  | 3.3 | 4568  |
| 21 | 40543968-40745546   | 201578   | 3.3 | 171   |
| 8  | 32811648-40301274   | 7489626  | 3.3 | 4263  |
| 15 | 90261698-100286563  | 10024865 | 3.2 | 7927  |
| 3  | 147081068-154232327 | 7151259  | 3.2 | 4599  |
| 8  | 27315068-32798198   | 5483130  | 3.2 | 3751  |
| 3  | 95002168-102619163  | 7616995  | 3.2 | 4219  |
| 5  | 57036474-58001786   | 965312   | 3.2 | 765   |
| 22 | 15546276-16090860   | 544584   | 3.2 | 376   |
| 19 | 41910-9681332       | 9639422  | 3.2 | 3787  |
| 3  | 171940031-177688920 | 5748889  | 3.2 | 3899  |
| 15 | 78938864-79874464   | 935600   | 3.2 | 612   |
| 22 | 43436490-44281401   | 844911   | 3.2 | 643   |
| 10 | 132882533-134560418 | 1677885  | 3.2 | 1015  |
| 8  | 103199421-103470330 | 270909   | 3.2 | 127   |
| 8  | 40312067-42977456   | 2665389  | 3.2 | 1715  |
| 3  | 102624138-131243312 | 28619174 | 3.2 | 17648 |
| 6  | 80007463-80946088   | 938625   | 3.2 | 644   |
| 6  | 77044929-79019608   | 1974679  | 3.2 | 1331  |
| 15 | 79883549-88847503   | 8963954  | 3.1 | 5637  |
| 8  | 25047152-27313704   | 2266552  | 3.1 | 1769  |
| 8  | 103709666-103886282 | 176616   | 3.1 | 112   |
| 15 | 58310954-78935266   | 20624312 | 3.1 | 13045 |
| 22 | 35991234-43031174   | 7039940  | 3.1 | 4175  |

|    |                     |          |     |      |
|----|---------------------|----------|-----|------|
| 6  | 79095953-80001776   | 905823   | 3.1 | 535  |
| 7  | 62892165-64885600   | 1993435  | 3.1 | 946  |
| 3  | 131293903-147075133 | 15781230 | 3.1 | 9944 |
| 9  | 34041128-34355357   | 314229   | 3.1 | 144  |
| 22 | 22731529-23487311   | 755782   | 3.1 | 426  |
| 14 | 79187069-81567551   | 2380482  | 3.1 | 1554 |
| 14 | 72183786-73020004   | 836218   | 3.1 | 483  |
| 3  | 159201141-163353922 | 4152781  | 3.0 | 2527 |
| 3  | 393585-584719       | 191134   | 3.0 | 173  |
| 10 | 342358-549266       | 206908   | 3.0 | 138  |
| 8  | 102298539-102577101 | 278562   | 3.0 | 248  |
| 14 | 73703618-79182423   | 5478805  | 3.0 | 3752 |
| 14 | 81573462-95785760   | 14212298 | 3.0 | 9788 |
| 16 | 15061218-29134899   | 14073681 | 3.0 | 8039 |
| 6  | 68284933-72923128   | 4638195  | 2.9 | 3038 |
| 11 | 15364316-15980260   | 615944   | 2.9 | 487  |
| 3  | 35345-391943        | 356598   | 2.9 | 350  |
| 16 | 7290455-14897340    | 7606885  | 2.9 | 6445 |
| 14 | 95787550-105399314  | 9611764  | 2.9 | 5595 |
| 16 | 4934417-6727409     | 1792992  | 2.9 | 2004 |
| 6  | 72932043-76210170   | 3278127  | 2.9 | 2111 |
| 6  | 63941094-65224771   | 1283677  | 2.9 | 649  |
| 4  | 109933430-110445238 | 511808   | 2.9 | 324  |
| 6  | 164733175-166140017 | 1406842  | 2.8 | 1059 |
| 16 | 777-476632          | 475855   | 2.8 | 222  |
| 16 | 30786351-32014468   | 1228117  | 2.8 | 492  |
| 16 | 476687-4500058      | 4023371  | 2.8 | 1683 |
| 2  | 144865617-146580899 | 1715282  | 2.8 | 1017 |
| 17 | 46790798-47714172   | 923374   | 2.8 | 761  |
| 4  | 4361778-4795240     | 433462   | 2.8 | 333  |
| 2  | 133251996-135006923 | 1754927  | 2.7 | 1387 |
| 6  | 80946400-80950048   | 3648     | 2.4 | 2    |
| 7  | 130011376-130012574 | 1198     | 1.8 | 3    |
| 1  | 31915904-31916940   | 1036     | 1.6 | 2    |
| 10 | 246705249-246804070 | 98821    | 1.6 | 28   |
| 1  | 48167566-49146476   | 978910   | 1.5 | 209  |
| 1  | 170034692-170335752 | 301060   | 1.5 | 204  |
| 1  | 179718880-180579380 | 860500   | 1.5 | 649  |
| 1  | 51267389-53775502   | 2508113  | 1.5 | 1285 |
| 1  | 241731166-242192377 | 461211   | 1.5 | 343  |
| 19 | 53508644-54098319   | 589675   | 1.5 | 203  |
| 19 | 52005247-52736055   | 730808   | 1.5 | 286  |
| 22 | 28672191-29615570   | 943379   | 1.5 | 583  |
| 1  | 100144830-100626343 | 481513   | 1.5 | 260  |
| 2  | 44574966-45151080   | 576114   | 1.5 | 422  |
| 2  | 71683290-72963372   | 1280082  | 1.5 | 643  |
| 1  | 117437428-118814926 | 1377498  | 1.5 | 811  |
| 1  | 230529647-230689742 | 160095   | 1.5 | 176  |
| 1  | 244887695-245574531 | 686836   | 1.5 | 439  |
| 2  | 15948138-17075031   | 1126893  | 1.5 | 800  |
| 1  | 34380928-36661125   | 2280197  | 1.5 | 1211 |
| X  | 103855195-104776367 | 921172   | 1.5 | 506  |
| 10 | 69123920-70080227   | 956307   | 1.5 | 485  |
| 2  | 41944415-42694094   | 749679   | 1.5 | 500  |
| 2  | 61543230-62329796   | 786566   | 1.5 | 366  |
| 1  | 165909616-166325398 | 415782   | 1.5 | 262  |
| 1  | 61551255-62551299   | 1000044  | 1.5 | 815  |
| 1  | 85121772-86552686   | 1430914  | 1.5 | 1019 |
| 1  | 239312051-240474093 | 1162042  | 1.5 | 932  |
| 19 | 48879346-49557541   | 678195   | 1.5 | 476  |
| 2  | 53301281-54244480   | 943199   | 1.5 | 665  |
| 10 | 89421040-89622383   | 201343   | 1.5 | 174  |
| X  | 96495212-96823336   | 328124   | 1.5 | 155  |
| 2  | 130385289-131309515 | 924226   | 1.5 | 240  |
| 1  | 59350347-59955799   | 605452   | 1.5 | 418  |
| 8  | 102698572-103115567 | 416995   | 1.5 | 315  |
| 10 | 4836866-6131965     | 1295099  | 1.5 | 981  |
| 22 | 14432528-14805217   | 372689   | 1.5 | 71   |
| 1  | 89245350-89629944   | 384594   | 1.5 | 241  |
| 2  | 14611378-14921304   | 309926   | 1.5 | 237  |
| 2  | 30119449-31038526   | 919077   | 1.5 | 606  |
| 1  | 112782935-116515302 | 3732367  | 1.5 | 2366 |
| 5  | 15776346-15981658   | 205312   | 1.5 | 122  |
| 10 | 51119375-51716809   | 597434   | 1.5 | 157  |
| 1  | 225535628-226958854 | 1423226  | 1.5 | 710  |
| 1  | 94312915-95522944   | 1210029  | 1.4 | 949  |
| 2  | 27545538-28224796   | 679258   | 1.4 | 330  |

|    |                     |          |     |      |
|----|---------------------|----------|-----|------|
| 1  | 221467647-221696077 | 228430   | 1.4 | 158  |
| 10 | 6553345-6689941     | 136596   | 1.4 | 103  |
| 10 | 45926794-47118840   | 1192046  | 1.4 | 307  |
| 5  | 16719407-17206001   | 486594   | 1.4 | 287  |
| 1  | 64556203-65018484   | 462281   | 1.4 | 343  |
| 1  | 46922381-47399833   | 477452   | 1.4 | 242  |
| 1  | 93170859-93900356   | 729497   | 1.4 | 365  |
| 1  | 206721575-208032210 | 1310635  | 1.4 | 1082 |
| 1  | 31917610-33277595   | 1359985  | 1.4 | 547  |
| 1  | 179076604-179501358 | 424754   | 1.4 | 308  |
| 1  | 54603144-55255325   | 652181   | 1.4 | 452  |
| 1  | 197632736-198736692 | 1103956  | 1.4 | 787  |
| 1  | 24805320-26918842   | 2113522  | 1.4 | 1100 |
| 1  | 111120414-112114074 | 993660   | 1.4 | 817  |
| 1  | 110036555-110572117 | 535562   | 1.4 | 358  |
| 1  | 216629371-217228400 | 599029   | 1.4 | 423  |
| 2  | 84688184-85304325   | 616141   | 1.4 | 340  |
| 1  | 65199673-65648439   | 448766   | 1.4 | 294  |
| 18 | 46819769-46820024   | 255      | 1.4 | 4    |
| 1  | 167132622-167464968 | 332346   | 1.4 | 310  |
| 1  | 44925703-45718061   | 792358   | 1.4 | 384  |
| 19 | 41291642-44541942   | 3250300  | 1.4 | 1662 |
| 1  | 45979296-46459374   | 480078   | 1.4 | 243  |
| 1  | 242889399-243161992 | 272593   | 1.4 | 130  |
| 1  | 55906056-57822727   | 1916671  | 1.4 | 1573 |
| 2  | 5405970-6072427     | 666457   | 1.4 | 590  |
| 19 | 55285805-55939311   | 653506   | 1.4 | 253  |
| 10 | 44987988-45576787   | 588799   | 1.4 | 284  |
| 1  | 108884941-110035094 | 1150153  | 1.4 | 625  |
| 8  | 105066086-105417726 | 351640   | 1.4 | 213  |
| 19 | 56275428-59685525   | 3410097  | 1.4 | 2322 |
| 2  | 37949776-39045486   | 1095710  | 1.4 | 754  |
| 9  | 44994996-65336138   | 20341142 | 1.4 | 86   |
| 1  | 218694464-219016303 | 321839   | 1.4 | 186  |
| 10 | 61358959-61484423   | 125464   | 1.4 | 119  |
| 1  | 96267086-97044600   | 777514   | 1.4 | 471  |
| 2  | 51052476-51493426   | 440950   | 1.4 | 313  |
| 5  | 5917529-6664757     | 747228   | 1.4 | 651  |
| 1  | 42461553-44505044   | 2043491  | 1.4 | 1189 |
| 8  | 102587767-102687413 | 99646    | 1.4 | 90   |
| 1  | 177439579-177544139 | 104560   | 1.4 | 105  |
| 1  | 162796246-163095552 | 299306   | 1.4 | 246  |
| 22 | 34249392-34458396   | 209004   | 1.4 | 155  |
| 1  | 102144629-102362899 | 218270   | 1.4 | 172  |
| 5  | 6665906-7685035     | 1019129  | 1.4 | 839  |
| 1  | 230836901-231057128 | 220227   | 1.4 | 152  |
| 5  | 14372158-15384304   | 1012146  | 1.4 | 703  |
| 1  | 200114411-200476356 | 361945   | 1.4 | 216  |
| 2  | 2784-291380         | 288596   | 1.4 | 192  |
| 10 | 70547234-70669751   | 122517   | 1.4 | 76   |
| 10 | 47151388-48097459   | 946071   | 1.4 | 185  |
| 1  | 222307562-222689901 | 382339   | 1.4 | 238  |
| 5  | 10295162-11188399   | 893237   | 1.4 | 743  |
| 1  | 80226934-82673852   | 2446918  | 1.4 | 1711 |
| 6  | 14971309-26426882   | 11455573 | 1.4 | 8430 |
| 6  | 13136318-14822174   | 1685856  | 1.4 | 1302 |
| 6  | 26609876-29944615   | 3334739  | 1.4 | 1596 |
| 2  | 1006951-2335000     | 1328049  | 1.4 | 841  |
| X  | 104799407-104880542 | 81135    | 1.4 | 47   |
| 1  | 171028464-171427555 | 399091   | 1.4 | 252  |
| 10 | 63944183-64054521   | 110338   | 1.4 | 72   |
| 1  | 172524588-172927174 | 402586   | 1.4 | 194  |
| 18 | 59272620-63443012   | 4170392  | 1.4 | 2954 |
| 1  | 97967505-98302175   | 334670   | 1.4 | 156  |
| 10 | 62057206-62214515   | 157309   | 1.4 | 113  |
| 5  | 647083-4609854      | 3962771  | 1.4 | 3186 |
| 6  | 30003952-31872878   | 1868926  | 1.4 | 950  |
| 10 | 81006701-81562784   | 556083   | 1.4 | 51   |
| 5  | 11237831-14122216   | 2884385  | 1.4 | 1882 |
| 10 | 59972521-60059007   | 86486    | 1.4 | 66   |
| 1  | 77144995-77335876   | 190881   | 1.4 | 108  |
| 6  | 733169-8551092      | 7817923  | 1.3 | 6550 |
| 8  | 99766247-100157433  | 391186   | 1.3 | 134  |
| 8  | 103895213-103981590 | 86377    | 1.3 | 47   |
| 18 | 68673407-76116029   | 7442622  | 1.3 | 5539 |
| X  | 143031241-148451627 | 5420386  | 1.3 | 3835 |
| 10 | 7777857-9206351     | 1428494  | 1.3 | 1218 |

|    |                     |          |     |       |
|----|---------------------|----------|-----|-------|
| 6  | 9571901-13134175    | 3562274  | 1.3 | 2777  |
| 18 | 63469463-68669065   | 5199602  | 1.3 | 3940  |
| 2  | 86621903-86943194   | 321291   | 1.3 | 130   |
| 13 | 75927360-77609997   | 1682637  | 1.3 | 1093  |
| 20 | 240235-401461       | 161226   | 1.3 | 101   |
| 11 | 188510-481334       | 292824   | 1.3 | 122   |
| 7  | 32994438-38445926   | 5451488  | 1.3 | 3938  |
| 5  | 17703686-21374946   | 3671260  | 1.3 | 2293  |
| 17 | 42395116-43073112   | 677996   | 1.3 | 292   |
| 17 | 7518132-19454355    | 11936223 | 1.3 | 7767  |
| 1  | 165509527-165621816 | 112289   | 1.3 | 48    |
| X  | 148850985-154632871 | 5781886  | 1.3 | 3247  |
| 7  | 13782371-27662790   | 13880419 | 1.3 | 10933 |
| 16 | 71670952-73803543   | 2132591  | 1.3 | 1485  |
| 7  | 8420719-11673553    | 3252834  | 1.3 | 2681  |
| 20 | 14639122-15153396   | 514274   | 1.2 | 470   |
| 7  | 38455202-51761516   | 13306314 | 1.2 | 9068  |
| 16 | 73809807-77620657   | 3810850  | 1.2 | 3738  |
| 11 | 118996915-134449982 | 15453067 | 1.2 | 11840 |
| 7  | 27667007-32984213   | 5317206  | 1.2 | 3924  |
| 7  | 3167816-4471001     | 1303185  | 1.2 | 1152  |
| 11 | 104463376-118990424 | 14527048 | 1.2 | 9867  |
| 7  | 4478405-8420420     | 3942015  | 1.2 | 2409  |
| 7  | 51811236-54477377   | 2666141  | 1.2 | 2020  |
| 7  | 1738239-3163095     | 1424856  | 1.2 | 756   |
| 13 | 90498691-109098163  | 18599472 | 1.2 | 14084 |
| X  | 148493841-148617321 | 123480   | 1.2 | 78    |
| 14 | 55285230-59076441   | 3791211  | 1.2 | 2755  |
| 17 | 19458875-20166355   | 707480   | 1.2 | 403   |
| 16 | 45021283-60442177   | 15420894 | 1.2 | 10420 |
| 10 | 39116227-44115532   | 4999305  | 1.2 | 1433  |
| 16 | 86673631-88815036   | 2141405  | 1.2 | 871   |
| 16 | 77722352-86667923   | 8945571  | 1.2 | 8874  |
| 1  | 101099302-101158767 | 59465    | 1.2 | 29    |
| 6  | 87475556-95340182   | 7864626  | 1.2 | 5268  |
| 22 | 35002522-35221804   | 219282   | 1.2 | 137   |
| 13 | 109101863-114126499 | 5024636  | 1.2 | 2976  |
| 13 | 77614025-84772150   | 7158125  | 1.2 | 4679  |
| 7  | 292305-1734526      | 1442221  | 1.2 | 388   |
| 6  | 80951883-87452286   | 6500403  | 1.2 | 4087  |
| 7  | 11691713-13734022   | 2042309  | 1.2 | 1645  |
| 6  | 95351785-126717047  | 31365262 | 1.1 | 19503 |
| 6  | 126721144-144586181 | 17865037 | 1.1 | 11716 |
| 13 | 84839694-90492717   | 5653023  | 1.1 | 3332  |
| 19 | 60094170-63789666   | 3695496  | 1.1 | 2315  |
| 19 | 17445908-20476510   | 3030602  | 1.1 | 1454  |
| 22 | 26644387-26712390   | 68003    | 1.1 | 37    |
| 14 | 18072124-20124317   | 2052193  | 1.1 | 694   |
| 9  | 98117119-98207740   | 90621    | 1.1 | 46    |
| 4  | 2281-56719          | 54438    | 1.1 | 63    |
| 9  | 35535830-38430946   | 2895116  | 1.0 | 1876  |
| 11 | 42208344-50359444   | 8151100  | 1.0 | 4681  |
