# Supplementary material for: Multi-Platform Whole-Genome Microarray Analyses Refine the Epigenetic Signature of Breast Cancer Metastasis with Gene Expression and Copy Number
Source: PubMed Central journal article supplement (PMC2801616; doi:10.1371/journal.pone.0008665), 2010-01-13
Supplement: pone.0008665.s004.pdf [file pone.0008665.s004.pdf]

**Supplemental Table 3: Regions showing an Decrease in copy number, (468GFP-LN relative to 468GFF**

| #chromosome | region              | length  | average Copy number | # probesets |
|-------------|---------------------|---------|---------------------|-------------|
| 1           | 31915904-31916940   | 1036    | 1.63                | 2           |
| 1           | 246705249-246804070 | 98821   | 1.55                | 28          |
| 10          | 48167566-49146476   | 978910  | 1.52                | 209         |
| 1           | 170034692-170335752 | 301060  | 1.50                | 204         |
| 1           | 179718880-180579380 | 860500  | 1.50                | 649         |
| 1           | 51267389-53775502   | 2508113 | 1.49                | 1285        |
| 1           | 241731166-242192377 | 461211  | 1.49                | 343         |
| 19          | 53508644-54098319   | 589675  | 1.49                | 203         |
| 19          | 52005247-52736055   | 730808  | 1.49                | 286         |
| 22          | 28672191-29615570   | 943379  | 1.49                | 583         |
| 1           | 100144830-100626343 | 481513  | 1.48                | 260         |
| 2           | 44574966-45151080   | 576114  | 1.48                | 422         |
| 2           | 71683290-72963372   | 1280082 | 1.48                | 643         |
| 1           | 117437428-118814926 | 1377498 | 1.48                | 811         |
| 1           | 230529647-230689742 | 160095  | 1.48                | 176         |
| 1           | 244887695-245574531 | 686836  | 1.48                | 439         |
| 2           | 15948138-17075031   | 1126893 | 1.47                | 800         |
| 1           | 34380928-36661125   | 2280197 | 1.47                | 1211        |
| X           | 103855195-104776367 | 921172  | 1.47                | 506         |
| 10          | 69123920-70080227   | 956307  | 1.47                | 485         |
| 2           | 41944415-42694094   | 749679  | 1.47                | 500         |
| 2           | 61543230-62329796   | 786566  | 1.47                | 366         |
| 1           | 165909616-166325398 | 415782  | 1.47                | 262         |
| 1           | 61551255-62551299   | 1000044 | 1.47                | 815         |
| 1           | 85121772-86552686   | 1430914 | 1.47                | 1019        |
| 1           | 239312051-240474093 | 1162042 | 1.47                | 932         |
| 19          | 48879346-49557541   | 678195  | 1.47                | 476         |
| 2           | 53301281-54244480   | 943199  | 1.47                | 665         |
| 10          | 89421040-89622383   | 201343  | 1.46                | 174         |
| X           | 96495212-96823336   | 328124  | 1.46                | 155         |
| 2           | 130385289-131309515 | 924226  | 1.46                | 240         |
| 1           | 59350347-59955799   | 605452  | 1.46                | 418         |
| 8           | 102698572-103115567 | 416995  | 1.46                | 315         |
| 10          | 4836866-6131965     | 1295099 | 1.46                | 981         |
| 22          | 14432528-14805217   | 372689  | 1.46                | 71          |
| 1           | 89245350-89629944   | 384594  | 1.46                | 241         |
| 2           | 14611378-14921304   | 309926  | 1.46                | 237         |
| 2           | 30119449-31038526   | 919077  | 1.45                | 606         |
| 1           | 112782935-116515302 | 3732367 | 1.45                | 2366        |
| 5           | 15776346-15981658   | 205312  | 1.45                | 122         |
| 10          | 51119375-51716809   | 597434  | 1.45                | 157         |
| 1           | 225535628-226958854 | 1423226 | 1.45                | 710         |
| 1           | 94312915-95522944   | 1210029 | 1.45                | 949         |
| 2           | 27545538-28224796   | 679258  | 1.45                | 330         |
| 1           | 221467647-221696077 | 228430  | 1.44                | 158         |
| 10          | 6553345-6689941     | 136596  | 1.44                | 103         |
| 10          | 45926794-47118840   | 1192046 | 1.44                | 307         |
| 5           | 16719407-17206001   | 486594  | 1.44                | 287         |
| 1           | 64556203-65018484   | 462281  | 1.44                | 343         |
| 1           | 46922381-47399833   | 477452  | 1.44                | 242         |
| 1           | 93170859-93900356   | 729497  | 1.44                | 365         |
| 1           | 206721575-208032210 | 1310635 | 1.44                | 1082        |
| 1           | 31917610-33277595   | 1359985 | 1.44                | 547         |
| 1           | 179076604-179501358 | 424754  | 1.44                | 308         |
| 1           | 54603144-55255325   | 652181  | 1.44                | 452         |
| 1           | 197632736-198736692 | 1103956 | 1.44                | 787         |
| 1           | 24805320-26918842   | 2113522 | 1.44                | 1100        |
| 1           | 111120414-112114074 | 993660  | 1.44                | 817         |
| 1           | 110036555-110572117 | 535562  | 1.43                | 358         |
| 1           | 216629371-217228400 | 599029  | 1.43                | 423         |
| 2           | 84688184-85304325   | 616141  | 1.43                | 340         |
| 1           | 65199673-65648439   | 448766  | 1.43                | 294         |
| 18          | 46819769-46820024   | 255     | 1.43                | 4           |
| 1           | 167132622-167464968 | 332346  | 1.43                | 310         |
| 1           | 44925703-45718061   | 792358  | 1.43                | 384         |
| 19          | 41291642-44541942   | 3250300 | 1.43                | 1662        |
| 1           | 45979296-46459374   | 480078  | 1.43                | 243         |
| 1           | 242889399-243161992 | 272593  | 1.43                | 130         |

|    |                     |          |      |       |
|----|---------------------|----------|------|-------|
| 1  | 55906056-57822727   | 1916671  | 1.42 | 1573  |
| 2  | 5405970-6072427     | 666457   | 1.42 | 590   |
| 19 | 55285805-55939311   | 653506   | 1.42 | 253   |
| 10 | 44987988-45576787   | 588799   | 1.42 | 284   |
| 1  | 108884941-110035094 | 1150153  | 1.42 | 625   |
| 8  | 105066086-105417726 | 351640   | 1.42 | 213   |
| 19 | 56275428-59685525   | 3410097  | 1.42 | 2322  |
| 2  | 37949776-39045486   | 1095710  | 1.42 | 754   |
| 9  | 44994996-65336138   | 20341142 | 1.42 | 86    |
| 1  | 218694464-219016303 | 321839   | 1.42 | 186   |
| 10 | 61358959-61484423   | 125464   | 1.41 | 119   |
| 1  | 96267086-97044600   | 777514   | 1.41 | 471   |
| 2  | 51052476-51493426   | 440950   | 1.41 | 313   |
| 5  | 5917529-6664757     | 747228   | 1.41 | 651   |
| 1  | 42461553-44505044   | 2043491  | 1.41 | 1189  |
| 8  | 102587767-102687413 | 99646    | 1.41 | 90    |
| 1  | 177439579-177544139 | 104560   | 1.41 | 105   |
| 1  | 162796246-163095552 | 299306   | 1.41 | 246   |
| 22 | 34249392-34458396   | 209004   | 1.41 | 155   |
| 1  | 102144629-102362899 | 218270   | 1.40 | 172   |
| 5  | 6665906-7685035     | 1019129  | 1.40 | 839   |
| 1  | 230836901-231057128 | 220227   | 1.40 | 152   |
| 5  | 14372158-15384304   | 1012146  | 1.40 | 703   |
| 1  | 200114411-200476356 | 361945   | 1.40 | 216   |
| 2  | 2784-291380         | 288596   | 1.40 | 192   |
| 10 | 70547234-70669751   | 122517   | 1.39 | 76    |
| 10 | 47151388-48097459   | 946071   | 1.39 | 185   |
| 1  | 222307562-222689901 | 382339   | 1.39 | 238   |
| 5  | 10295162-11188399   | 893237   | 1.39 | 743   |
| 1  | 80226934-82673852   | 2446918  | 1.38 | 1711  |
| 6  | 14971309-26426882   | 11455573 | 1.38 | 8430  |
| 6  | 13136318-14822174   | 1685856  | 1.38 | 1302  |
| 6  | 26609876-29944615   | 3334739  | 1.38 | 1596  |
| 2  | 1006951-2335000     | 1328049  | 1.38 | 841   |
| X  | 104799407-104880542 | 81135    | 1.37 | 47    |
| 1  | 171028464-171427555 | 399091   | 1.37 | 252   |
| 10 | 63944183-64054521   | 110338   | 1.37 | 72    |
| 1  | 172524588-172927174 | 402586   | 1.37 | 194   |
| 18 | 59272620-63443012   | 4170392  | 1.37 | 2954  |
| 1  | 97967505-98302175   | 334670   | 1.37 | 156   |
| 10 | 62057206-62214515   | 157309   | 1.37 | 113   |
| 5  | 647083-4609854      | 3962771  | 1.37 | 3186  |
| 6  | 30003952-31872878   | 1868926  | 1.37 | 950   |
| 10 | 81006701-81562784   | 556083   | 1.37 | 51    |
| 5  | 11237831-14122216   | 2884385  | 1.35 | 1882  |
| 10 | 59972521-60059007   | 86486    | 1.35 | 66    |
| 1  | 77144995-77335876   | 190881   | 1.35 | 108   |
| 6  | 733169-8551092      | 7817923  | 1.35 | 6550  |
| 8  | 99766247-100157433  | 391186   | 1.34 | 134   |
| 8  | 103895213-103981590 | 86377    | 1.33 | 47    |
| 18 | 68673407-76116029   | 7442622  | 1.33 | 5539  |
| X  | 143031241-148451627 | 5420386  | 1.33 | 3835  |
| 10 | 7777857-9206351     | 1428494  | 1.33 | 1218  |
| 6  | 9571901-13134175    | 3562274  | 1.33 | 2777  |
| 18 | 63469463-68669065   | 5199602  | 1.32 | 3940  |
| 2  | 86621903-86943194   | 321291   | 1.32 | 130   |
| 13 | 75927360-77609997   | 1682637  | 1.31 | 1093  |
| 20 | 240235-401461       | 161226   | 1.30 | 101   |
| 11 | 188510-481334       | 292824   | 1.30 | 122   |
| 7  | 32994438-38445926   | 5451488  | 1.30 | 3938  |
| 5  | 17703686-21374946   | 3671260  | 1.29 | 2293  |
| 17 | 42395116-43073112   | 677996   | 1.28 | 292   |
| 17 | 7518132-19454355    | 11936223 | 1.28 | 7767  |
| 1  | 165509527-165621816 | 112289   | 1.27 | 48    |
| X  | 148850985-154632871 | 5781886  | 1.27 | 3247  |
| 7  | 13782371-27662790   | 13880419 | 1.26 | 10933 |
| 16 | 71670952-73803543   | 2132591  | 1.26 | 1485  |
| 7  | 8420719-11673553    | 3252834  | 1.26 | 2681  |
| 20 | 14639122-15153396   | 514274   | 1.23 | 470   |
| 7  | 38455202-51761516   | 13306314 | 1.23 | 9068  |
| 16 | 73809807-77620657   | 3810850  | 1.23 | 3738  |
| 11 | 118996915-134449982 | 15453067 | 1.23 | 11840 |

|    |                     |          |      |       |
|----|---------------------|----------|------|-------|
| 7  | 27667007-32984213   | 5317206  | 1.23 | 3924  |
| 7  | 3167816-4471001     | 1303185  | 1.23 | 1152  |
| 11 | 104463376-118990424 | 14527048 | 1.22 | 9867  |
| 7  | 4478405-8420420     | 3942015  | 1.22 | 2409  |
| 7  | 51811236-54477377   | 2666141  | 1.21 | 2020  |
| 7  | 1738239-3163095     | 1424856  | 1.21 | 756   |
| 13 | 90498691-109098163  | 18599472 | 1.21 | 14084 |
| X  | 148493841-148617321 | 123480   | 1.20 | 78    |
| 14 | 55285230-59076441   | 3791211  | 1.20 | 2755  |
| 17 | 19458875-20166355   | 707480   | 1.20 | 403   |
| 16 | 45021283-60442177   | 15420894 | 1.20 | 10420 |
| 10 | 39116227-44115532   | 4999305  | 1.20 | 1433  |
| 16 | 86673631-88815036   | 2141405  | 1.19 | 871   |
| 16 | 77722352-86667923   | 8945571  | 1.19 | 8874  |
| 1  | 101099302-101158767 | 59465    | 1.18 | 29    |
| 6  | 87475556-95340182   | 7864626  | 1.18 | 5268  |
| 22 | 35002522-35221804   | 219282   | 1.17 | 137   |
| 13 | 109101863-114126499 | 5024636  | 1.17 | 2976  |
| 13 | 77614025-84772150   | 7158125  | 1.17 | 4679  |
| 7  | 292305-1734526      | 1442221  | 1.17 | 388   |
| 6  | 80951883-87452286   | 6500403  | 1.17 | 4087  |
| 7  | 11691713-13734022   | 2042309  | 1.15 | 1645  |
| 6  | 95351785-126717047  | 31365262 | 1.14 | 19503 |
| 6  | 126721144-144586181 | 17865037 | 1.14 | 11716 |
| 13 | 84839694-90492717   | 5653023  | 1.14 | 3332  |
| 19 | 60094170-63789666   | 3695496  | 1.13 | 2315  |
| 19 | 17445908-20476510   | 3030602  | 1.12 | 1454  |
| 22 | 26644387-26712390   | 68003    | 1.10 | 37    |
| 14 | 18072124-20124317   | 2052193  | 1.08 | 694   |
| 9  | 98117119-98207740   | 90621    | 1.07 | 46    |
| 4  | 2281-56719          | 54438    | 1.06 | 63    |
| 9  | 35535830-38430946   | 2895116  | 1.04 | 1876  |
| 11 | 42208344-50359444   | 8151100  | 1.03 | 4681  |
| 20 | 3926209-4062913     | 136704   | 0.96 | 113   |
| 11 | 55119916-55132856   | 12940    | 0.96 | 9     |
| 1  | 37192428-41960253   | 4767825  | 0.95 | 2763  |
| 9  | 34358097-35534057   | 1175960  | 0.92 | 622   |
| 12 | 108693615-108884864 | 191249   | 0.89 | 99    |
| 18 | 1543-15392408       | 15390865 | 0.88 | 10622 |
| 19 | 9681700-10738387    | 1056687  | 0.74 | 454   |
| 11 | 30136885-38817927   | 8681042  | 0.74 | 6290  |
| 4  | 70162241-70183466   | 21225    | 0.70 | 14    |
| 3  | 197261134-197261261 | 127      | 0.70 | 3     |
| 21 | 9758742-14346239    | 4587497  | 0.70 | 569   |
| 11 | 28816432-30128490   | 1312058  | 0.68 | 818   |
| 11 | 25919584-28807470   | 2887886  | 0.67 | 1916  |
| 7  | 56703960-57242577   | 538617   | 0.62 | 127   |
| 21 | 14995007-16486581   | 1491574  | 0.57 | 1063  |
| 4  | 70189134-70209004   | 19870    | 0.50 | 9     |
| 21 | 14457461-14687786   | 230325   | 0.50 | 162   |
| 7  | 55943236-56255432   | 312196   | 0.50 | 137   |
| 21 | 14380475-14413121   | 32646    | 0.46 | 20    |
| 21 | 14751128-14881879   | 130751   | 0.44 | 115   |
| 1  | 150838805-150852862 | 14057    | 0.42 | 16    |
| 21 | 14413165-14457314   | 44149    | 0.38 | 28    |
| 7  | 55800568-55942420   | 141852   | 0.35 | 66    |
| Y  | 24578356-24697220   | 118864   | 0.34 | 30    |
| Y  | 22191306-22529167   | 337861   | 0.33 | 96    |
| Y  | 4920268-5117638     | 197370   | 0.33 | 45    |
| Y  | 15417161-15642352   | 225191   | 0.32 | 120   |
| Y  | 9916486-10061768    | 145282   | 0.32 | 56    |
| Y  | 169542-2875303      | 2705761  | 0.32 | 94    |
| Y  | 3503397-3606615     | 103218   | 0.32 | 19    |
| Y  | 20276103-20575181   | 299078   | 0.31 | 137   |
| Y  | 15192157-15351018   | 158861   | 0.31 | 98    |
| Y  | 5555743-5886923     | 331180   | 0.31 | 77    |
| Y  | 21233259-21424276   | 191017   | 0.30 | 113   |
| Y  | 26136561-26502815   | 366254   | 0.30 | 154   |
| Y  | 22752065-23922949   | 1170884  | 0.30 | 191   |
| Y  | 18600026-18918077   | 318051   | 0.30 | 136   |
| Y  | 18472916-18574836   | 101920   | 0.30 | 43    |
| Y  | 12881420-13984995   | 1103575  | 0.30 | 557   |

|    |                     |         |      |      |
|----|---------------------|---------|------|------|
| Y  | 19261735-19779256   | 517521  | 0.30 | 263  |
| Y  | 14091850-14851426   | 759576  | 0.30 | 372  |
| Y  | 7162192-7503949     | 341757  | 0.29 | 173  |
| Y  | 22057829-22189203   | 131374  | 0.29 | 57   |
| Y  | 25367413-26133162   | 765749  | 0.29 | 137  |
| Y  | 25078106-25358503   | 280397  | 0.28 | 41   |
| Y  | 18247793-18472221   | 224428  | 0.28 | 104  |
| Y  | 20182342-20275835   | 93493   | 0.28 | 40   |
| Y  | 6791267-7155456     | 364189  | 0.28 | 190  |
| Y  | 5898465-6232905     | 334440  | 0.28 | 127  |
| Y  | 19112261-19261722   | 149461  | 0.27 | 84   |
| Y  | 5119423-5551644     | 432221  | 0.27 | 86   |
| Y  | 21119798-21232123   | 112325  | 0.27 | 39   |
| Y  | 13985947-14089104   | 103157  | 0.26 | 55   |
| Y  | 15094990-15190450   | 95460   | 0.26 | 40   |
| Y  | 22587206-22751738   | 164532  | 0.25 | 45   |
| Y  | 2878038-2931352     | 53314   | 0.25 | 20   |
| Y  | 15353654-15414397   | 60743   | 0.24 | 34   |
| 1  | 246815817-246861087 | 45270   | 0.23 | 30   |
| 1  | 110035754-110036151 | 397     | 0.21 | 4    |
| 11 | 55159390-55187640   | 28250   | 0.21 | 19   |
| 10 | 72269865-72272401   | 2536    | 0.19 | 3    |
| 19 | 40541333-40548543   | 7210    | 0.18 | 11   |
| 7  | 32985593-32991713   | 6120    | 0.17 | 3    |
| 10 | 45613625-45905767   | 292142  | 0.13 | 3    |
| 7  | 54481855-55791075   | 1309220 | 0.11 | 1089 |
| 14 | 73076460-73090732   | 14272   | 0.11 | 8    |
| 14 | 71806722-71806932   | 210     | 0.11 | 5    |
| 4  | 70184239-70189096   | 4857    | 0.10 | 4    |
| 5  | 15773075-15773597   | 522     | 0.07 | 9    |
