# Supplementary material for: Multi-Platform Whole-Genome Microarray Analyses Refine the Epigenetic Signature of Breast Cancer Metastasis with Gene Expression and Copy Number
Source: PubMed Central journal article supplement (PMC2801616; doi:10.1371/journal.pone.0008665), 2010-01-13
Supplement: pone.0008665.s005.pdf [file pone.0008665.s005.pdf]

Supplemental Table 4: Genes significantly increased in expression, LN vs GFP

| Cell line (*) | 468GFP      |        |         |       | 468GFP-LN |              |        |         | Common    | Map          |
|---------------|-------------|--------|---------|-------|-----------|--------------|--------|---------|-----------|--------------|
|               | Ratio to GF | t-test | P-value | Flags | Raw       | Ratio to GFP | t-test | P-value |           |              |
| Systematic    | 1.00        | 0.95   | A       | 0.93  | 2491.46   | 0.00         | P      | 2287.83 | CTAG1     | xq28         |
| 210546_x_at   | 0.98        | 0.91   | A       | 1.80  | 1495.97   | 0.00         | P      | 2651.93 | CTAG1     | xq28         |
| 214674_x_at   | 0.99        | 0.92   | A       | 1.47  | 1188.55   | 0.00         | P      | 1724.33 | CAPN3     | 5q15.1-q21.1 |
| 214475_x_at   | 0.99        | 0.94   | A       | 2.33  | 1138.19   | 0.00         | P      | 3053.33 | CTAG2     | xq28         |
| 213733_x_at   | 0.92        | 0.80   | A       | 1.13  | 1074.00   | 0.00         | P      | 1186.33 | MGC62094  | xp11.22      |
| 1555504_at    | 0.97        | 0.87   | A       | 0.57  | 1039.49   | 0.00         | P      | 577.93  | TYR       | 11q14-q21    |
| 224964_s_at   | 0.82        | 0.69   | A       | 1.73  | 617.13    | 0.00         | P      | 1063.23 | GNCG2     | 14q21        |
| 203803_s_at   | 0.83        | 0.71   | A       | 1.23  | 615.83    | 0.00         | P      | 752.87  | ZFX1B     | 2q22         |
| 209170_s_at   | 1.00        | 0.97   | A       | 2.33  | 595.83    | 0.00         | P      | 1367.93 | GPM6B     | xq22.2       |
| 200665_s_at   | 0.64        | 0.57   | A       | 4.20  | 554.03    | 0.00         | P      | 2317.60 | SPARC     | 5q31.3-q32   |
| 205433_at     | 0.69        | 0.66   | A       | 4.87  | 498.35    | 0.00         | P      | 2372.63 | BCHC      | 3q26.1-q26.2 |
| 211890_x_at   | 0.90        | 0.80   | A       | 2.90  | 492.96    | 0.00         | P      | 1428.30 | CAPN3     | 5q15.1-q21.1 |
| 209686_at     | 0.96        | 0.86   | A       | 3.93  | 488.91    | 0.00         | P      | 1876.80 | S100B     | 21q22.3      |
| 206332_s_at   | 0.99        | 0.94   | A       | 4.17  | 486.59    | 0.00         | P      | 1999.83 | IFI16     | 1q22         |
| 206070_s_at   | 0.92        | 0.81   | A       | 2.50  | 471.97    | 0.00         | P      | 1154.53 | EPHA3     | 3p11.2       |
| 206645_s_at   | 0.92        | 0.80   | A       | 1.83  | 468.42    | 0.00         | P      | 849.53  | NROB1     | 6p21.3-p21.2 |
| 228375_at     | 0.91        | 0.80   | A       | 3.03  | 465.21    | 0.00         | P      | 1403.20 | IGSF11    | 3q13.33      |
| 205029_s_at   | 0.78        | 0.70   | A       | 4.49  | 451.89    | 0.00         | P      | 2005.57 | FABP7     | 6q22-q23     |
| 235944_at     | 0.84        | 0.72   | A       | 1.80  | 457.63    | 0.00         | P      | 825.13  | FIBL6     | 1q25.3       |
| 201744_s_at   | 0.59        | 0.54   | A       | 1.00  | 457.00    | 0.00         | P      | 438.03  | LUM       | 12q21.3-q22  |
| 47550_at      | 0.95        | 0.84   | A       | 1.80  | 418.23    | 0.00         | P      | 745.50  | LZTS1     | 8p22         |
| 205862_at     | 0.66        | 0.57   | A       | 2.37  | 386.67    | 0.00         | P      | 877.73  | GREB1     | 2p25.1       |
| 217339_at     | 1.00        | 0.97   | A       | 5.23  | 377.92    | 0.00         | P      | 4398.73 | CTAG1     | xq28         |
| 1555505_s_at  | 0.73        | 0.62   | A       | 7.67  | 377.78    | 0.00         | P      | 2884.43 | TYR       | 11q14-q21    |
| 203132_at     | 0.56        | 0.55   | A       | 1.50  | 375.88    | 0.00         | P      | 542.33  | RB1       | 13q14.2      |
| 1559827_at    | 0.99        | 0.92   | A       | 0.83  | 353.78    | 0.00         | P      | 290.37  |           | 3p14.1       |
| 219279_at     | 0.99        | 0.94   | A       | 1.40  | 353.37    | 0.00         | P      | 487.43  | DOCK10    | 2q36.3       |
| 205694_at     | 0.99        | 0.94   | PA      | 13.87 | 318.64    | 0.00         | P      | 4398.73 | TYRPH1    | 9p23         |
| 219296_at     | 0.91        | 0.79   | A       | 2.73  | 317.14    | 0.00         | P      | 862.00  | SFGS20    | 13q13.2      |
| 207397_s_at   | 0.97        | 0.87   | A       | 1.40  | 309.97    | 0.00         | P      | 423.47  | HOXD13    | 2q31.1       |
| 232504_at     | 0.97        | 0.87   | A       | 2.50  | 298.52    | 0.00         | P      | 739.00  | LOC285628 | 5q34         |
| 219911_s_at   | 0.98        | 0.90   | A       | 6.30  | 296.53    | 0.00         | P      | 1829.13 | SLCO4A1   | 20q13.33     |
| 159100_s_at   | 0.96        | 0.94   | A       | 0.43  | 294.59    | 0.00         | P      | 126.03  |           |              |
| 208965_s_at   | 0.83        | 0.73   | A       | 3.00  | 285.51    | 0.00         | P      | 836.53  | IFI16     | 1q22         |
| 204237_at     | 0.93        | 0.82   | A       | 5.00  | 275.46    | 0.00         | P      | 1346.33 | GULP1     | 2q32.3-q33   |
| 209167_at     | 0.73        | 0.62   | A       | 6.77  | 270.99    | 0.00         | P      | 1824.07 | GPM6B     | Xp22.2       |
| 231899_at     | 0.83        | 0.72   | A       | 1.87  | 270.45    | 0.00         | P      | 493.90  | KIAA1726  | 11q23.1      |
| 208996_at     | 0.97        | 0.87   | A       | 7.77  | 198.00    | 0.00         | P      | 1988.20 | TOF12     | 15q21        |
| 205427_s_at   | 0.85        | 0.75   | A       | 20.07 | 255.21    | 0.00         | P      | 5109.23 | MLANA     | 9p24.1       |
| 205893_at     | 0.74        | 0.68   | A       | 1.43  | 226.75    | 0.00         | P      | 319.37  | NLGN1     | 3q26.32      |
| 209031_at     | 0.99        | 0.94   | A       | 3.97  | 224.11    | 0.00         | P      | 873.43  | IGSF4     | 11q23.2      |
| 207337_at     | 0.88        | 0.75   | A       | 6.17  | 222.51    | 0.00         | P      | 1367.47 | CTAG2     | xq28         |
| 226333_at     | 0.98        | 0.89   | A       | 2.47  | 216.06    | 0.00         | P      | 529.63  | ILBR      | 1q21         |
| 205337_at     | 1.00        | 0.99   | A       | 19.90 | 211.08    | 0.00         | P      | 4130.43 | DCCT      | 13q32        |
| 213139_at     | 0.91        | 0.80   | A       | 8.97  | 207.57    | 0.00         | P      | 1825.87 | SNAI2     | 8q11         |
| 214321_at     | 0.79        | 0.71   | M.A     | 12.33 | 198.56    | 0.00         | P      | 2443.90 | NOV       | 8q24.1       |
| 238041_at     | 0.68        | 0.60   | A       | 1.47  | 196.93    | 0.00         | P      | 286.60  |           |              |
| 206956_at     | 0.96        | 0.86   | A       | 7.73  | 196.40    | 0.00         | P      | 1396.40 | GPR143    | xq22.3       |
| 218474_s_at   | 0.96        | 0.86   | A       | 6.20  | 181.35    | 0.00         | P      | 927.87  | KCTD5     | 16p13.3      |
| 203440_at     | 0.85        | 0.74   | A       | 3.30  | 171.36    | 0.00         | P      | 549.63  | CDH2      | 18q11.2      |
| 215913_s_at   | 0.99        | 0.93   | A       | 1.70  | 168.40    | 0.00         | P      | 287.50  | GULP1     | 2q32.3-q33   |
| 209524_at     | 0.97        | 0.89   | A       | 1.57  | 165.45    | 0.00         | P      | 256.40  | HDGFRP3   | 15q11.2      |
| 217963_s_at   | 0.89        | 0.76   | A       | 20.07 | 151.31    | 0.00         | P      | 3202.83 | NGFRAP1   | xq22         |
| 204266_at     | 0.77        | 0.70   | PA      | 13.83 | 159.15    | 0.00         | P      | 2137.87 | MLANA     | 9p24.1       |
| 204591_at     | 0.78        | 0.66   | A       | 4.67  | 158.91    | 0.00         | P      | 739.27  | CHL1      | 3p26.1       |
| 220004_at     | 0.84        | 0.72   | A       | 2.33  | 157.08    | 0.00         | P      | 366.20  | DDX43     | 6q12-q13     |
| 210198_s_at   | 0.75        | 0.64   | A       | 19.93 | 153.76    | 0.00         | P      | 2950.23 | PLP1      | xq22         |
| 201822_at     | 1.00        | 0.96   | A       | 6.80  | 153.43    | 0.00         | P      | 727.67  | IGFBP7    | 4q12         |
| 219042_at     | 0.96        | 0.85   | A       | 2.50  | 151.23    | 0.00         | P      | 375.30  | LZTS1     | 8p22         |
| 226785_at     | 0.72        | 0.62   | A       | 3.73  | 149.69    | 0.00         | P      | 554.43  | ATP11C    | xq27.1       |
| 227529_s_at   | 1.00        | 0.97   | A       | 1.43  | 148.82    | 0.00         | P      | 211.10  | AKAP12    | 6q24-q25     |
| 209392_at     | 0.98        | 0.90   | A       | 11.67 | 148.48    | 0.00         | P      | 1707.80 | ENPP2     | 8q24.1       |
| 221558_s_at   | 0.96        | 0.86   | A       | 12.63 | 144.90    | 0.00         | P      | 134.40  |           |              |
| 221974_at     | 0.96        | 0.85   | A       | 23.57 | 142.47    | 0.00         | P      | 3327.97 | DCCT      | 13q32        |
| 218512_s_at   | 0.91        | 0.79   | A       | 13.63 | 138.51    | 0.00         | P      | 1835.63 | IFI16     | 1q22         |
| 208966_x_at   | 0.97        | 0.88   | A       | 1.70  | 132.78    | 0.00         | P      | 220.77  | PAG       | 8q21.12      |
| 225626_at     | 0.99        | 0.93   | A       | 39.50 | 127.68    | 0.00         | P      | 4961.20 | FABP7     | 6q22-q23     |
| 205030_at     | 0.90        | 0.77   | A       | 5.47  | 123.96    | 0.00         | P      | 857.13  | LEF1      | 4q23-q25     |
| 221558_s_at   | 0.83        | 0.73   | A       | 3.57  | 122.88    | 0.00         | P      | 430.88  | FSTL5     | 4q32.3       |
| 232010_at     | 0.96        | 0.86   | A       | 10.13 | 121.95    | 0.00         | P      | 1222.80 | AKAP12    | 6q24-q25     |
| 210517_s_at   | 0.98        | 0.91   | P,M,A   | 16.87 | 119.85    | 0.00         | P      | 1988.23 | LOC51186  | xq22.2       |
| 217975_at     | 0.99        | 0.95   | A       | 2.00  | 117.06    | 0.00         | P      | 230.83  | ASPA      | 17pter-p13   |
| 206030_at     | 0.93        | 0.83   | A       | 1.03  | 112.29    | 0.00         | P      | 115.67  | AASS      | 7q31.3       |
| 214829_at     | 0.88        | 0.75   | A       | 3.13  | 110.96    | 0.00         | P      | 341.50  | B3GNT7    | 2q37.1       |
| 1555963_x_at  | 0.78        | 0.70   | A       | 2.27  | 104.05    | 0.00         | P      | 231.97  |           |              |
| 201426_s_at   | 0.99        | 0.93   | A       | 56.47 | 103.67    | 0.00         | P      | 5798.10 | VIM       | 10p13        |
| 232204_at     | 0.98        | 0.90   | A       | 2.57  | 100.98    | 0.00         | P      | 254.63  | EBF       | 5q34         |
| 213838_at     | 0.96        | 0.86   | A       | 13.40 | 99.06     | 0.00         | P      | 1308.23 | PHACTR1   | 9p23         |
| 223741_s_at   | 0.90        | 0.76   | A       | 8.40  | 93.25     | 0.00         | P      | 833.23  | TTYH2     | 17q24        |
| 232136_s_at   | 0.90        | 0.77   | A       | 0.73  | 98.52     | 0.00         | P      | 71.33   | CORTBP2   | 7q31         |
| 223629_at     | 0.85        | 0.73   | A       | 3.80  | 96.95     | 0.00         | P      | 368.33  | PCDH85    | 5q31         |
| 224397_s_at   | 0.98        | 0.90   | A       | 2.50  | 92.54     | 0.00         | P      | 229.03  | ARG99     | 12p11.23     |
| 236611_at     | 0.99        | 0.95   | A       | 8.00  | 92.35     | 0.00         | P      | 724.53  | HOXD13    | 2q31.1       |
| 217858_s_at   | 0.99        | 0.95   | A       | 10.53 | 90.11     | 0.00         | P      | 933.30  | ARMCC8    | xq1.33-q22.2 |
| 223975_at     | 0.85        | 0.74   | A       | 5.73  | 90.08     | 0.00         | P      | 500.90  | TRIM51    | 11q12.1      |
| 225566_at     | 0.97        | 0.88   | A       | 6.33  | 89.80     | 0.00         | P      | 555.93  | NRP2      | 2q33.3       |
| 213624_at     | 0.92        | 0.80   | A       | 6.20  | 89.66     | 0.00         | P      | 551.27  | SMPDL3A   | 6q22.32      |
| 230272_at     | 0.98        | 0.91   | A       | 1.07  | 86.64     | 0.00         | P      | 90.47   |           |              |
| 209751_s_at   | 0.97        | 0.87   | A       | 5.77  | 84.17     | 0.00         | P      | 478.43  | KHDRBS3   | 8q24.2       |
| 204955_at     | 0.98        | 0.90   | P       | 25.40 | 84.02     | 0.00         | P      | 2094.73 | SRPX      | xp21.1       |
| 213417_at     | 0.99        | 0.93   | A       | 4.53  | 82.02     | 0.00         | P      | 366.70  | TBX2      | 17q23        |
| 213943_at     | 0.88        | 0.77   | A       | 1.63  | 81.50     | 0.00         | P      | 132.87  | TWIST1    | 7p21.2       |
| 40560_at      | 1.00        | 0.96   | A       | 7.93  | 81.37     | 0.00         | P      | 633.47  | TBX2      | 17q23        |
| 209843_s_at   | 0.99        | 0.95   | A       | 11.43 | 81.25     | 0.00         | P      | 919.83  | SOX10     | 22q13.1      |
| 227522_at     | 0.71        | 0.60   | A       | 4.87  | 80.34     | 0.00         | P      | 392.80  | LOC134147 | 5p15.31      |
| 224210_s_at   | 1.00        | 0.96   | A       | 2.00  | 78.25     | 0.00         | P      | 153.73  | PXMP4     | 20q11.22     |
| 206071_s_at   | 0.84        | 0.71   | A       | 3.20  | 77.99     | 0.00         | P      | 247.53  | EPHA3     | 3p11.2       |
| 202253_at     | 0.97        | 0.87   | A       | 14.53 | 77.97     | 0.00         | P      | 1106.50 | SERPINF1  | 17p13.1      |
| 208630_at     | 0.98        | 0.90   | A       | 60.70 | 77.97     | 0.00         | P      | 4639.67 | TYR       | 11q14-q21    |
| 237070_at     | 0.95        | 0.85   | A       | 2.97  | 76.62     | 0.00         | P      | 222.90  | TRPM1     | 15q13-q14    |
| 206617_s_at   | 0.99        | 0.93   | A       | 7.80  | 76.47     | 0.00         | P      | 587.73  | REBP      | xq28         |
| 225945_at     | 0.86        | 0.74   | A       | 6.43  | 76.33     | 0.00         | P      | 488.70  | VIK       | 7q22.1       |
| 205945_at     | 0.77        | 0.67   | A       | 5.80  | 75.38     | 0.00         | P      | 437.57  | ILBR      | 1q21         |
| 213252_at     | 0.97        | 0.88   | PA      | 8.23  | 75.26     | 0.00         | P      | 612.67  | SACS      | 13q12        |
| 225599_s_at   | 0.88        | 0.77   | A       | 6.80  | 72.16     | 0.00         | P      | 478.87  | LOC286144 | 8q22.1       |
| 214434_at     | 0.95        | 0.84   | A       | 5.37  | 71.88     | 0.00         | P      | 375.90  | HSPA12A   | 10q26.12     |
| 202219_at     | 0.95        | 0.85   | A       | 27.83 | 69.88     | 0.00         | P      | 1910.77 | SLC6A8    | xq28         |
| 219872_at     | 0.88        | 0.75   | A       | 5.80  | 69.25     | 0.00         | P      | 391.83  | KFZp434L1 | 4q32.1       |
| 211844_s_at   | 0.95        | 0.85   | A       | 2.57  | 67.51     | 0.00         | P      | 169.57  | NRP2      | 2q33.3       |
| 220534_at     | 1.00        | 0.96   | A       | 20.60 | 67.09     | 0.00         | P      | 1359.07 | TRIM48    | 11q12.1      |
| 227297_at     | 0.85        | 0.72   | A       | 2.77  | 66.96     | 0.00         | P      | 185.17  | ITGA9     | 3p21.3       |
| 237991_at     | 0.91        | 0.79   | A       | 2.37  | 65.21     | 0.00         | P      | 150.17  |           |              |
| 208642_at     | 0.87        | 0.74   | A       | 35.77 | 64.70     | 0.00         | P      | 2245.87 | SOX10     | 22q13.1      |
| 230047_at     | 0.78        | 0.66   | A       | 4.73  | 63.46     | 0.00         | P      | 299.33  | FLJ32810  | 1q22.1-q22.2 |
| 207253_s_at   | 0.97        | 0.88   | A       | 3.77  | 62.87     | 0.00         | P      | 232.40  | UBN1      | 16p13.3      |
| 223204_at     | 1.00        | 0.99   | P       | 38.47 | 61.87     | 0.00         | P      | 2342.10 | KFZp434L1 | 4q32.1       |
| 212915_at     | 0           |        |         |       |           |              |        |         |           |              |

|              |      |      |     |        |       |      |      |         |                        |
|--------------|------|------|-----|--------|-------|------|------|---------|------------------------|
| 236038_at    | 0.97 | 0.87 | A   | 0.63   | 57.26 | 0.00 | P    | 35.50   |                        |
| 227655_at    | 0.86 | 0.74 | A   | 3.07   | 57.04 | 0.00 | P    | 169.60  |                        |
| 229430_at    | 0.77 | 0.66 | A   | 3.93   | 56.93 | 0.00 | P    | 224.57  | MGC33510 8q12.3        |
| 204465_s_at  | 0.96 | 0.84 | A   | 37.50  | 56.94 | 0.00 | P    | 2105.37 | SNCA 4q21              |
| 206233_at    | 0.78 | 0.66 | A   | 6.10   | 56.83 | 0.00 | P    | 345.00  | B4GALT6 18q11          |
| 209859_at    | 0.96 | 0.87 | A   | 10.83  | 56.10 | 0.00 | P    | 604.30  | TRIM9 14q22.1          |
| 205269_at    | 0.95 | 0.84 | PA  | 7.43   | 55.65 | 0.00 | P    | 403.20  | LCP2 5q33.1-qter       |
| 241789_at    | 0.77 | 0.65 | A   | 1.13   | 55.57 | 0.00 | PA   | 63.50   | RBM53 3p24-p23         |
| 225711_at    | 0.79 | 0.66 | A   | 5.37   | 55.43 | 0.00 | P    | 341.80  | ATP9B2 1q22            |
| 204627_s_at  | 0.90 | 0.78 | A   | 2.70   | 55.12 | 0.00 | P    | 142.93  | ITGB3 17q21.32         |
| 226707_at    | 0.98 | 0.90 | A   | 6.53   | 52.98 | 0.00 | P    | 342.23  | PP3856 8q24.3          |
| 204736_s_at  | 0.81 | 0.72 | A   | 2.13   | 52.78 | 0.00 | P    | 114.43  | CSPG4 15q23            |
| 229222_at    | 0.97 | 0.88 | A   | 7.50   | 52.42 | 0.00 | P    | 387.40  | FLJ21963 12q21.31      |
| 235127_at    | 0.95 | 0.84 | A   | 2.20   | 52.12 | 0.00 | P    | 114.20  | PMP2 3q21.3-q22.1      |
| 211682_x_at  | 0.98 | 0.91 | A   | 4.13   | 51.18 | 0.00 | P,MA | 212.67  | UGT2B28 4q13.3         |
| 231666_at    | 0.85 | 0.74 | A   | 11.33  | 51.10 | 0.00 | P    | 569.50  | PAX3 2q35              |
| 228214_at    | 0.94 | 0.83 | A   | 7.53   | 50.45 | 0.00 | P    | 379.13  |                        |
| 1561789_at   | 0.79 | 0.71 | A   | 1.90   | 50.31 | 0.00 | P    | 95.37   |                        |
| 1554726_at   | 0.88 | 0.75 | A   | 1.53   | 50.22 | 0.00 | P    | 74.80   | VIK 7q22.1             |
| 229225_at    | 0.81 | 0.68 | A   | 11.40  | 48.65 | 0.00 | P    | 536.13  | NRP2 2q33.3            |
| 210944_s_at  | 1.00 | 0.98 | P   | 46.60  | 48.47 | 0.00 | P    | 2222.37 | CAPN3 5a15.1-q21.1     |
| 226322_at    | 0.97 | 0.87 | A   | 9.10   | 48.46 | 0.00 | P    | 434.50  | ARG99 12p11.23         |
| 215043_s_at  | 0.94 | 0.82 | A   | 1.17   | 48.23 | 0.00 | P    | 55.73   | LOC153611 5q13.2       |
| 223595_at    | 0.93 | 0.83 | A   | 8.40   | 48.18 | 0.00 | P    | 402.33  | AD031 11q22.2          |
| 205338_s_at  | 1.00 | 0.97 | PA  | 90.73  | 48.15 | 0.00 | P    | 4303.33 | DC1 13q32              |
| 156331_a_at  | 0.79 | 0.71 | A   | 1.87   | 46.12 | 0.00 | PM   | 85.13   |                        |
| 242690_at    | 0.91 | 0.78 | A   | 1.53   | 45.96 | 0.00 | PA   | 69.50   | ATP11C xq27.1          |
| 243481_at    | 0.84 | 0.72 | A   | 2.63   | 45.93 | 0.00 | P    | 120.50  | RHOJ 14q23.2           |
| 209199_s_at  | 0.81 | 0.68 | A   | 45.87  | 45.86 | 0.00 | P    | 318.00  | MEF2C 5q14             |
| 231337_at    | 0.76 | 0.64 | A   | 7.53   | 45.67 | 0.00 | P    | 344.43  |                        |
| 205498_at    | 0.95 | 0.85 | A   | 10.90  | 45.22 | 0.00 | P    | 488.60  | GHR 5p13-p12           |
| 1564198_a_at | 0.80 | 0.70 | A   | 6.60   | 45.11 | 0.00 | P    | 293.50  | C10orf90 10q26.2       |
| 203402_at    | 0.72 | 0.61 | A   | 15.00  | 44.59 | 0.00 | P    | 644.13  | KCNAB2 1p36.3          |
| 227812_at    | 0.96 | 0.92 | A   | 15.83  | 44.58 | 0.00 | P    | 545.23  | TNFRSF19 3q12.11-q12.3 |
| 221524_s_at  | 0.89 | 0.78 | A   | 34.50  | 43.61 | 0.00 | P    | 1472.93 | RRAGD 6q15-q16         |
| 222444_at    | 0.96 | 0.86 | A   | 9.33   | 43.54 | 0.00 | P    | 401.47  | ARMCX3 a21.33-q22.2    |
| 203729_at    | 0.99 | 0.91 | M,A | 33.90  | 43.36 | 0.00 | P    | 1440.00 | EMP3 19q13.3           |
| 235593_at    | 0.79 | 0.67 | A   | 5.77   | 43.35 | 0.00 | P    | 248.67  | ZFX1B 2q22             |
| 233308_at    | 0.82 | 0.70 | A   | 5.10   | 43.30 | 0.00 | P    | 214.11  | ZNF288 3q12.2          |
| 228245_s_at  | 0.99 | 0.94 | PM  | 85.33  | 43.01 | 0.00 | P    | 3611.30 | OVS02 12p11.22         |
| 1554018_at   | 1.00 | 0.97 | P   | 32.83  | 43.00 | 0.00 | P    | 1391.00 | GNPMB 7p15             |
| 207808_s_at  | 0.98 | 0.90 | A   | 21.27  | 42.96 | 0.00 | P    | 894.47  | PROS1 3q11.2           |
| 244612_at    | 0.92 | 0.81 | A   | 0.57   | 42.45 | 0.00 | P    | 23.93   |                        |
| 243918_at    | 0.94 | 0.82 | A   | 2.33   | 42.43 | 0.00 | P    | 113.03  |                        |
| 228564_at    | 0.94 | 0.82 | A   | 8.07   | 41.08 | 0.00 | P    | 325.93  | LOC375295 2q31.2       |
| 212624_s_at  | 0.98 | 0.89 | A   | 7.00   | 41.01 | 0.00 | PA   | 284.77  | CHN1 2q31-q32.1        |
| 201621_at    | 0.96 | 0.86 | A   | 36.47  | 40.85 | 0.00 | P    | 1491.83 | NBL1 p36.13-p36.11     |
| 209200_at    | 0.90 | 0.78 | A   | 2.10   | 40.75 | 0.00 | PA   | 86.30   | MEF2C 5q14             |
| 237631_at    | 0.95 | 0.85 | A   | 11.83  | 40.62 | 0.00 | P    | 477.63  |                        |
| 236972_at    | 0.84 | 0.71 | A   | 3.87   | 40.57 | 0.00 | P    | 152.20  | RNF28 1p34-p33         |
| 218506_x_at  | 1.00 | 0.96 | A   | 19.07  | 40.53 | 0.00 | P    | 762.70  | N-PAC 16p13.3          |
| 219594_at    | 0.96 | 0.86 | A   | 2.67   | 40.21 | 0.00 | PA   | 106.63  | NINJ2 12p13.1          |
| 202527_s_at  | 0.91 | 0.81 | A   | 9.33   | 40.09 | 0.00 | P    | 365.57  | SMAD4 18q21.1          |
| 1561157_a_at | 0.91 | 0.78 | A   | 3.70   | 39.85 | 0.00 | P    | 723.43  | LOC283352 12q24.3      |
| 213712_at    | 0.98 | 0.89 | M,A | 30.20  | 39.28 | 0.00 | P    | 1172.07 | ELOVL2 6p24.1          |
| 202947_s_at  | 0.97 | 0.88 | A   | 32.83  | 38.67 | 0.00 | P    | 1246.27 | GYPC 2q14-q21          |
| 231597_x_at  | 0.86 | 0.75 | PA  | 32.20  | 38.62 | 0.00 | P    | 1215.10 |                        |
| 216813_at    | 0.97 | 0.87 | A   | 1.93   | 38.38 | 0.00 | P    | 76.17   |                        |
| 215241_at    | 0.89 | 0.77 | A   | 38.60  | 38.33 | 0.00 | P    | 219.83  | TMEM16C 11p14.3        |
| 230560_at    | 0.90 | 0.79 | A   | 5.43   | 37.96 | 0.00 | P    | 201.23  | STXBP6 14q11.2         |
| 223723_at    | 0.97 | 0.87 | A   | 3.80   | 37.47 | 0.00 | P    | 140.63  | MF12 3q28-q29          |
| 213435_at    | 0.93 | 0.81 | PA  | 18.07  | 37.43 | 0.00 | P    | 658.20  | SATB2 2q33             |
| 238447_at    | 0.92 | 0.81 | A   | 8.23   | 37.37 | 0.00 | P    | 307.67  | RBM53 3p24-p23         |
| 204759_at    | 0.71 | 0.62 | A   | 10.10  | 37.29 | 0.00 | P    | 150.73  | CHC11 13q14.3          |
| 228695_at    | 0.80 | 0.67 | A   | 5.97   | 37.19 | 0.00 | P    | 221.57  | MGC33510 8q12.3        |
| 221523_s_at  | 1.00 | 0.97 | PA  | 18.23  | 37.02 | 0.00 | P    | 663.73  | RRAGD 6q15-q16         |
| 213222_at    | 0.95 | 0.85 | A   | 18.77  | 36.79 | 0.00 | P    | 678.57  | PLCB1 20p12            |
| 235334_at    | 0.96 | 0.85 | A   | 7.70   | 36.06 | 0.00 | P    | 270.63  | SIAT7C 1p31.1          |
| 236465_at    | 0.89 | 0.78 | A   | 20.90  | 35.80 | 0.00 | P    | 700.87  | LOC285533 8            |
| 1558937_s_at | 0.99 | 0.94 | A   | 1.23   | 35.49 | 0.00 | P    | 43.43   |                        |
| 220425_x_at  | 0.97 | 0.87 | A   | 22.77  | 35.48 | 0.00 | P    | 789.30  | ROPN1 3q21.2           |
| 234583_at    | 0.98 | 0.89 | A   | 2.30   | 35.44 | 0.00 | P    | 79.77   |                        |
| 224965_at    | 0.99 | 0.95 | A   | 13.80  | 35.36 | 0.00 | P    | 482.20  | GN2 14q21              |
| 224233_s_at  | 0.96 | 0.86 | A   | 3.77   | 35.33 | 0.00 | P    | 131.00  | PRDM7 16q24.3          |
| 206232_s_at  | 0.97 | 0.88 | A   | 4.10   | 34.73 | 0.00 | PA   | 141.93  | B4GALT6 18q11          |
| 244387_at    | 0.95 | 0.84 | A   | 8.33   | 34.64 | 0.00 | P    | 286.57  |                        |
| 206560_s_at  | 0.89 | 0.78 | A   | 10.17  | 34.62 | 0.00 | P    | 345.57  | MIA q13.32-q13.33      |
| 237069_s_at  | 0.85 | 0.73 | A   | 2.77   | 34.55 | 0.00 | P    | 95.07   | TRPM1 15q13-q14        |
| 1555233_at   | 0.94 | 0.84 | A   | 5.80   | 34.58 | 0.00 | P    | 195.73  |                        |
| 226695_at    | 0.85 | 0.72 | A   | 10.10  | 34.35 | 0.00 | P    | 336.13  | PRRX1 1q24             |
| 230264_s_at  | 0.99 | 0.93 | P   | 96.07  | 34.34 | 0.00 | P    | 3255.73 | AP1S2 xp22.31          |
| 229001_at    | 0.96 | 0.86 | A   | 4.00   | 34.34 | 0.00 | P    | 137.03  | PPP1R3E 14q11.2        |
| 218120_s_at  | 0.92 | 0.80 | M,A | 22.80  | 33.98 | 0.00 | P    | 761.57  | HMOX2 16p13.3          |
| 205954_at    | 0.99 | 0.92 | A   | 27.10  | 33.66 | 0.00 | P    | 900.13  | RXRG 1q22-q23          |
| 213158_at    | 0.95 | 0.84 | M,A | 5.23   | 33.66 | 0.00 | P    | 174.73  |                        |
| 201141_at    | 1.00 | 0.96 | P   | 117.23 | 33.45 | 0.00 | P    | 3864.70 | GNPMB 7p15             |
| 205884_at    | 0.89 | 0.76 | A   | 6.20   | 33.40 | 0.00 | P    | 205.27  | ITGA4 2q31-q32         |
| 210078_s_at  | 0.98 | 0.91 | PA  | 18.13  | 33.28 | 0.00 | P    | 597.50  | KCNAB1 3q26.1          |
| 230831_at    | 0.98 | 0.90 | A   | 5.10   | 32.63 | 0.00 | P    | 188.11  |                        |
| 226636_at    | 0.95 | 0.83 | A   | 4.93   | 32.98 | 0.01 | P,MA | 168.20  | PLD1 3q26              |
| 201360_at    | 0.99 | 0.92 | A   | 18.27  | 32.93 | 0.00 | P    | 594.03  | CST3 20p11.21          |
| 227354_at    | 0.78 | 0.66 | A   | 5.93   | 32.81 | 0.00 | P    | 193.73  | PAG 8q21.12            |
| 228876_at    | 0.95 | 0.85 | A   | 13.80  | 32.69 | 0.00 | P    | 441.23  | FLJ22582 22q13.1       |
| 240671_at    | 0.97 | 0.88 | A   | 1.37   | 32.65 | 0.00 | P    | 44.43   |                        |
| 204086_at    | 0.99 | 0.94 | A   | 20.40  | 32.45 | 0.00 | P    | 649.83  | PRAME 22q11.22         |
| 206785_s_at  | 0.92 | 0.81 | A   | 1.27   | 32.29 | 0.00 | PA   | 41.03   | KLRC1 12p13            |
| 223501_at    | 0.96 | 0.86 | PA  | 29.03  | 32.24 | 0.00 | P    | 914.27  | TNFSF13B 13q32-34      |
| 1555962_at   | 0.74 | 0.64 | A   | 10.13  | 32.09 | 0.00 | P    | 336.60  | ESGNT7 2q37.1          |
| 202986_at    | 0.93 | 0.82 | A   | 10.87  | 31.87 | 0.00 | P    | 340.63  | ARNT2 15q24            |
| 207307_at    | 1.00 | 0.98 | A   | 2.60   | 31.81 | 0.00 | P    | 81.50   | HTR2C xq24             |
| 225603_s_at  | 0.97 | 0.87 | A   | 13.10  | 31.77 | 0.00 | P    | 409.40  | LOC286144 8q22.1       |
| 219686_at    | 0.96 | 0.85 | A   | 10.53  | 31.75 | 0.00 | PA   | 326.40  | STK32B 4p16.2          |
| 220122_at    | 0.91 | 0.78 | A   | 17.33  | 31.74 | 0.00 | P    | 535.77  | FLJ22344 5q15          |
| 210202_s_at  | 0.90 | 0.77 | A   | 4.47   | 31.67 | 0.00 | P    | 140.57  | BIN1 2q14              |
| 213069_at    | 0.99 | 0.95 | A   | 12.50  | 31.42 | 0.00 | P    | 387.77  | HEG 3q21.2             |
| 241698_at    | 0.98 | 0.90 | A   | 3.97   | 31.28 | 0.00 | P    | 122.63  | C2orf11 2q33.1         |
| 225382_at    | 1.00 | 0.97 | A   | 8.37   | 31.26 | 0.00 | PA   | 257.30  | ZNF275 xq28            |
| 228170_at    | 0.99 | 0.95 | PA  | 16.00  | 31.05 | 0.00 | P    | 488.60  | OLIG1 21q22.11         |
| 211708_s_at  | 0.92 | 0.81 | A   | 13.90  | 30.76 | 0.00 | P    | 408.37  | SCD 10q23-q24          |
| 232881_s_at  | 0.82 | 0.72 | A   | 5.07   | 30.60 | 0.00 | P    | 152.93  | SANG 20q13.32          |
| 231067_s_at  | 0.78 | 0.66 | A   | 3.37   | 30.59 | 0.00 | P    | 99.60   | AKAP12 6q24-q25        |
| 219263_at    | 0.85 | 0.74 | A   | 7.23   | 30.47 | 0.00 | P    | 216.70  | RNF128 xq22.3          |
| 244163_at    | 0.90 | 0.79 | A   | 0.90   | 30.29 | 0.00 | P    | 27.57   | SEMAS3 7p12.1          |
| 210839_s_at  | 0.98 | 0.89 | PA  | 24.07  | 29.81 | 0.00 | P    | 716.17  | ENPP2 6q24.1           |
| 205542_at    | 1.00 | 0.98 | A   | 32.80  | 29.90 | 0.00 | P    | 965.73  | STEAP 7q21             |
| 1560813_at   | 0.96 | 0.86 | A   | 2.90   | 29.84 | 0.00 | P    | 85.40   |                        |
| 235740_at    | 0.96 | 0.86 | A   | 12.03  | 29.84 | 0.00 | P    | 355.13  | FLJ22344 5q15          |
| 238852_at    | 0.87 | 0.77 | A   | 3.87   | 29.73 | 0.00 | P    | 113.87  |                        |
| 239182_at    | 0.90 | 0.80 | A   | 1.63   | 29.63 | 0.00 | PM   | 47.47   | LOC401022 2q31.2       |
| 207398_at    | 0.97 | 0.88 | A   | 5.23   | 29.49 | 0.00 | P    | 152.57  | HOXD13 2q31.1          |
| 203815_at    | 1.00 | 0.99 | A   | 6.20   | 29.18 | 0.00 | P    | 179.53  | GSTT1 22q11.23         |
| 222877_at    | 0.98 | 0.91 | A   | 17.07  | 28.80 | 0.00 | P    | 486.47  | NRP2 2q33.3            |
| 203300_x_at  | 0.98 | 0.89 | P   | 94.07  | 28.79 | 0.00 | P    | 2687.10 | AP1S2 xp22.31          |
| 219892_s_at  | 0.99 | 0.93 | A   | 2.60   | 28.73 | 0.00 | PA   | 74.27   | TBX3 12q24.1           |
| 220666_at    | 0.98 | 0.90 | A   | 1.67   | 28.63 | 0.00 | P    | 47.     |                        |

|              |      |      |     |        |       |      |     |         |           |               |
|--------------|------|------|-----|--------|-------|------|-----|---------|-----------|---------------|
| 220029_at    | 0.97 | 0.87 | A   | 28.13  | 27.74 | 0.00 | P   | 780.60  | ELOVL2    | 6p24.1        |
| 227646_at    | 0.84 | 0.72 | A   | 5.93   | 27.74 | 0.00 | P   | 164.63  | EBF       | 5q34          |
| 206155_at    | 0.93 | 0.80 | A   | 11.33  | 27.40 | 0.00 | P   | 307.70  | ABCC2     | 10q24         |
| 205270_s_at  | 0.91 | 0.80 | A   | 15.43  | 27.39 | 0.00 | P   | 415.43  | LCP2      | 5q33.1-pter   |
| 207144_s_at  | 0.96 | 0.86 | A   | 7.53   | 27.34 | 0.00 | P   | 205.23  | CITED1    | xq13.1        |
| 227498_at    | 0.99 | 0.94 | A   | 28.53  | 27.24 | 0.00 | P   | 764.47  |           |               |
| 228333_at    | 0.97 | 0.87 | A   | 15.40  | 27.24 | 0.00 | P   | 415.60  |           |               |
| 223502_s_at  | 0.99 | 0.93 | A   | 31.50  | 27.11 | 0.00 | P   | 842.00  | TNFSF13B  | 13q32-34      |
| 203404_at    | 0.97 | 0.89 | A   | 6.27   | 26.95 | 0.00 | P   | 167.17  | ARMIC2    | q21.33-q22.2  |
| 213843_x_at  | 0.98 | 0.90 | PA  | 60.00  | 26.84 | 0.00 | P   | 1601.47 | SLC6A8    | xq28          |
| 205334_at    | 0.99 | 0.93 | A   | 51.17  | 26.82 | 0.00 | P   | 1349.57 | S100A1    | 1q21          |
| 227826_s_at  | 0.99 | 0.94 | A   | 13.00  | 26.71 | 0.00 | P   | 343.87  |           |               |
| 229822_at    | 0.83 | 0.70 | A   | 8.03   | 26.68 | 0.00 | P   | 207.27  | PARVG     | 22q13.2-q13   |
| 206642_x_at  | 0.99 | 0.92 | A   | 12.90  | 26.55 | 0.00 | P   | 337.00  | SNRPN     | 15q12         |
| 1555527_at   | 0.96 | 0.87 | A   | 2.47   | 26.55 | 0.00 | P   | 64.10   | COL9A1    | 6q12-q14      |
| 212190_at    | 1.00 | 0.97 | P   | 184.77 | 26.41 | 0.00 | P   | 4798.63 | SERPINE2  | 2q33-q35      |
| 204491_at    | 0.93 | 0.82 | A   | 10.40  | 26.35 | 0.00 | P   | 272.70  | PDE4D     | 5q12          |
| 204467_s_at  | 0.92 | 0.79 | A   | 23.57  | 26.30 | 0.00 | P   | 614.50  | SNCA      | 4q21          |
| 209030_s_at  | 0.91 | 0.79 | A   | 23.07  | 26.29 | 0.00 | P   | 602.13  | IGSF4     | 11q23.2       |
| 1561521_at   | 0.94 | 0.84 | A   | 0.33   | 26.26 | 0.00 | PA  | 8.90    | S100B     | 21q22.3       |
| 205226_at    | 0.95 | 0.84 | A   | 2.60   | 26.17 | 0.00 | P   | 66.60   | PDGFRL    | 8p22-p21.3    |
| 227827_at    | 0.86 | 0.73 | A   | 11.23  | 25.84 | 0.00 | P   | 281.47  |           |               |
| 216253_s_at  | 0.98 | 0.89 | MA  | 26.20  | 25.70 | 0.00 | P   | 665.67  | PARVB     | 2q13.2-q13.33 |
| 218625_at    | 1.00 | 0.96 | A   | 45.20  | 25.66 | 0.00 | P   | 1139.90 | NRN1      | 6p25.1        |
| 205348_s_at  | 1.00 | 0.98 | A   | 59.07  | 25.66 | 0.00 | P   | 1490.67 | DNCH1     | 7q21.3-q22.1  |
| 208885_at    | 0.87 | 0.76 | A   | 63.87  | 25.58 | 0.00 | P   | 1634.83 | LCP1      | 13q14.3       |
| 210619_s_at  | 0.85 | 0.72 | A   | 15.77  | 25.54 | 0.00 | P   | 389.53  | HYAL1     | 3p21.3-p21.2  |
| 220974_x_at  | 0.90 | 0.77 | A   | 37.07  | 25.38 | 0.00 | P   | 932.17  | BA108L7.2 | 10q24.32      |
| 1556763_at   | 0.93 | 0.80 | PA  | 8.27   | 25.33 | 0.00 | PA  | 17.03   |           |               |
| 238906_s_at  | 0.94 | 0.82 | PA  | 8.43   | 25.33 | 0.00 | P   | 208.07  | RHOJ      | 14q23.2       |
| 214632_at    | 1.00 | 0.97 | PA  | 19.43  | 24.91 | 0.00 | P   | 476.77  | NRP2      | 2q33.3        |
| 204860_s_at  | 0.99 | 0.94 | A   | 2.77   | 24.90 | 0.00 | PA  | 68.73   | BIRC1     | 5q13.1        |
| 231131_at    | 0.89 | 0.77 | A   | 3.27   | 24.82 | 0.00 | P   | 81.13   | FLJ37659  | xq21.33       |
| 217236_s_at  | 0.99 | 0.92 | PM  | 52.97  | 24.82 | 0.00 | P   | 1824.97 | PRRX1     | 1q24          |
| 226676_at    | 0.98 | 0.89 | A   | 1.50   | 24.46 | 0.00 | PMA | 35.87   | ZNF521    | 18q11.2       |
| 224191_x_at  | 0.87 | 0.76 | A   | 23.37  | 24.41 | 0.00 | P   | 559.13  | ROPN1     | 3q21.2        |
| 238935_at    | 0.98 | 0.91 | PA  | 20.07  | 24.33 | 0.00 | P   | 482.20  | RPS27L    | 15q22.1       |
| 220298_s_at  | 0.98 | 0.90 | A   | 2.83   | 24.06 | 0.00 | P   | 66.63   | SPATA6    | 1p33          |
| 1554443_s_at | 0.86 | 0.74 | A   | 6.50   | 23.90 | 0.00 | P   | 370.47  | VMD2      | 7q13          |
| 201137_s_at  | 0.95 | 0.84 | A   | 6.50   | 23.90 | 0.00 | P   | 153.80  | HLA-DPB1  | 6p21.3        |
| 228601_at    | 0.99 | 0.94 | A   | 11.23  | 23.86 | 0.00 | P   | 265.27  | LOC401022 | 2q31.2        |
| 208454_s_at  | 0.91 | 0.78 | A   | 7.07   | 23.58 | 0.00 | P   | 165.83  | PGCP      | 8q22.2        |
| 202316_x_at  | 0.97 | 0.89 | A   | 5.87   | 23.57 | 0.00 | P   | 136.17  | UBE4B     | 1p36.3        |
| 156007_at    | 0.94 | 0.82 | A   | 23.63  | 23.53 | 0.00 | P   | 147.53  |           |               |
| 219046_s_at  | 1.00 | 0.95 | A   | 17.13  | 23.53 | 0.00 | P   | 395.77  | PKNOX2    | 11q24         |
| 218775_s_at  | 0.90 | 0.78 | A   | 5.03   | 23.44 | 0.00 | P   | 117.70  | BOMB      | 4q35.1        |
| 229138_at    | 0.87 | 0.75 | A   | 7.90   | 23.26 | 0.00 | P   | 188.50  | C12orf6   | 12p13.3       |
| 210807_s_at  | 0.86 | 0.73 | A   | 7.43   | 22.89 | 0.00 | P   | 168.53  | SLC16A7   | 12q13         |
| 230413_s_at  | 0.99 | 0.96 | A   | 33.63  | 22.87 | 0.00 | P   | 735.47  | AP1S2     | Xp21.31       |
| 224477_s_at  | 0.99 | 0.92 | A   | 4.23   | 22.53 | 0.00 | P   | 95.03   | SDOS      | 16p13.3       |
| 231361_at    | 0.97 | 0.87 | A   | 12.97  | 22.43 | 0.00 | P   | 284.03  | NLGN1     | 3q26.32       |
| 212576_at    | 0.92 | 0.80 | A   | 14.40  | 22.39 | 0.00 | P   | 319.43  | MGRN1     | 16p13.3       |
| 242137_at    | 0.97 | 0.88 | A   | 1.57   | 22.19 | 0.00 | PMA | 34.40   |           |               |
| 202897_at    | 0.92 | 0.80 | A   | 22.07  | 22.19 | 0.00 | P   | 433.37  |           |               |
| 241386_at    | 0.94 | 0.83 | A   | 7.53   | 21.98 | 0.00 | P   | 163.00  | PTPNS1    | 20p13         |
| 241612_at    | 0.84 | 0.71 | A   | 5.83   | 21.77 | 0.00 | P   | 125.77  | FOXD3     | 1p32-p31      |
| 210869_s_at  | 1.00 | 0.96 | P   | 44.07  | 21.75 | 0.00 | P   | 943.73  | MCAM      | 11q23.3       |
| 203068_at    | 0.88 | 0.77 | A   | 46.17  | 21.50 | 0.00 | P   | 972.53  | KIAA0469  | 1p36.23       |
| 211546_x_at  | 0.99 | 0.94 | A   | 31.20  | 21.17 | 0.00 | P   | 651.17  | SNCA      | 4q21          |
| 235359_at    | 0.86 | 0.73 | A   | 19.53  | 20.99 | 0.00 | P   | 397.90  | UNQ3030   | 3q29          |
| 1553938_a_at | 0.94 | 0.83 | A   | 9.03   | 20.80 | 0.00 | P   | 183.30  | STK32A    | 5q32          |
| 213355_at    | 1.00 | 0.98 | PMA | 65.13  | 20.75 | 0.00 | P   | 1332.20 | SIAT10    | 3q12.2        |
| 209168_at    | 0.98 | 0.91 | MA  | 26.20  | 20.65 | 0.00 | P   | 531.57  | GPM6B     | xp22.2        |
| 219102_at    | 0.93 | 0.81 | A   | 8.10   | 20.38 | 0.00 | P   | 176.63  | RONS      | 19p13.33      |
| 244463_at    | 0.90 | 0.78 | A   | 2.17   | 20.36 | 0.00 | P   | 44.00   | ADAM23    | 2q33          |
| 205168_at    | 0.89 | 0.76 | A   | 20.57  | 20.05 | 0.00 | P   | 410.47  | DDR2      | 1q12-q23      |
| 37965_at     | 0.96 | 0.87 | P   | 78.67  | 19.90 | 0.00 | P   | 1551.57 | PARVB     | 2q13.2-q13.33 |
| 235147_at    | 0.85 | 0.72 | A   | 7.00   | 19.90 | 0.00 | P   | 136.03  |           |               |
| 227617_at    | 0.94 | 0.83 | A   | 53.60  | 19.80 | 0.00 | PM  | 1040.23 |           |               |
| 225681_at    | 1.00 | 0.97 | P   | 34.80  | 19.87 | 0.00 | P   | 681.17  | CTHRC1    | 8q22.3        |
| 1553747_at   | 0.97 | 0.88 | A   | 2.00   | 19.37 | 0.00 | P   | 38.77   | MGC16025  | 2q37.3        |
| 204780_s_at  | 0.92 | 0.81 | PA  | 17.70  | 19.29 | 0.00 | P   | 334.93  | TNFRSF6   | 10q24.1       |
| 210942_s_at  | 0.98 | 0.89 | PM  | 69.10  | 19.26 | 0.00 | P   | 1316.80 | SIAT10    | 3q12.2        |
| 228931_at    | 0.99 | 0.95 | A   | 15.97  | 19.19 | 0.00 | P   | 301.47  | ARGSB9    | 12p11.23      |
| 203348_s_at  | 1.00 | 0.96 | PM  | 72.90  | 19.19 | 0.00 | P   | 1378.33 | ETV5      | 3q28          |
| 204629_at    | 1.00 | 0.95 | A   | 67.03  | 19.15 | 0.00 | P   | 1263.83 | PARVB     | 2q13.2-q13.33 |
| 219855_at    | 1.00 | 0.95 | A   | 8.37   | 19.02 | 0.00 | P   | 156.93  | NUDT11    | xp11.23       |
| 1552658_a_at | 0.88 | 0.77 | A   | 6.17   | 18.83 | 0.00 | P   | 114.07  | NAV3      | 12q14.3       |
| 204214_s_at  | 0.94 | 0.82 | A   | 6.90   | 18.83 | 0.00 | P   | 1106.20 | RAB32     | 6q24.2        |
| 227497_at    | 0.98 | 0.89 | A   | 31.80  | 18.82 | 0.00 | P   | 591.97  |           |               |
| 1557218_s_at | 0.98 | 0.91 | A   | 4.10   | 18.78 | 0.00 | P   | 75.93   | FLJ34064  | xp22.31       |
| 207827_x_at  | 1.00 | 0.96 | P   | 42.53  | 18.69 | 0.00 | P   | 786.23  | SNCA      | 4q21          |
| 213809_at    | 0.98 | 0.91 | A   | 2.27   | 18.48 | 0.00 | PMA | 41.20   |           |               |
| 212667_at    | 0.97 | 0.88 | A   | 12.80  | 18.43 | 0.00 | P   | 232.40  | SPARC     | 5q31.3-q32    |
| 207469_s_at  | 1.00 | 0.98 | P   | 163.37 | 18.43 | 0.00 | P   | 2959.47 | PIR       | xp22.31       |
| 227544_at    | 0.84 | 0.70 | A   | 13.97  | 18.37 | 0.00 | P   | 252.33  | C14orf83  | 14q23.3       |
| 213010_at    | 0.99 | 0.93 | A   | 29.53  | 18.36 | 0.00 | P   | 534.97  | PRKCDBP   | 11p15.4       |
| 203845_at    | 0.98 | 0.89 | P   | 63.13  | 18.28 | 0.00 | P   | 1138.60 | PCAF      | 3p24          |
| 227530_at    | 0.94 | 0.83 | A   | 24.63  | 18.25 | 0.00 | P   | 448.23  | AKAP12    | 6q25-q25      |
| 213325_at    | 0.87 | 0.74 | A   | 9.87   | 18.21 | 0.00 | P   | 178.53  | PVRL3     | 3q13          |
| 204425_at    | 0.99 | 0.95 | A   | 4.93   | 18.19 | 0.00 | P   | 88.73   | ARHGAP4   | xq28          |
| 211162_x_at  | 0.96 | 0.86 | A   | 20.90  | 18.09 | 0.00 | PM  | 373.80  | SCD       | 10q23-q24     |
| 205407_at    | 1.00 | 0.96 | PMA | 15.67  | 18.06 | 0.00 | P   | 278.13  | RECK      | 9p13-p12      |
| 242770_at    | 0.97 | 0.87 | A   | 5.47   | 18.02 | 0.00 | P   | 96.20   |           |               |
| 225544_at    | 0.99 | 0.94 | A   | 3.13   | 18.02 | 0.00 | PA  | 55.67   | TBX3      | 12q24.1       |
| 1555471_a_at | 0.98 | 0.89 | PA  | 9.27   | 17.90 | 0.00 | P   | 162.17  | FMN2      | 1q43          |
| 232268_at    | 0.97 | 0.87 | A   | 3.03   | 17.82 | 0.00 | P   | 54.30   |           |               |
| 215209_at    | 0.97 | 0.86 | A   | 1.17   | 17.81 | 0.01 | PA  | 22.60   | SEC24D    | 4q27          |
| 215591_at    | 0.89 | 0.78 | A   | 4.67   | 17.79 | 0.00 | P   | 82.43   | SATB2     | 2q33          |
| 223079_s_at  | 0.91 | 0.80 | P   | 55.97  | 17.77 | 0.00 | P   | 989.60  | GLS       | 2q32-q34      |
| 225728_at    | 0.95 | 0.84 | A   | 21.70  | 17.76 | 0.00 | P   | 382.40  |           |               |
| 232122_s_at  | 0.99 | 0.92 | A   | 28.40  | 17.70 | 0.00 | P   | 493.80  | FLJ12604  | 3q24-q25      |
| 205475_at    | 1.00 | 0.95 | PA  | 34.63  | 17.66 | 0.00 | P   | 601.93  | SCRG1     | 4q31-q32      |
| 209583_s_at  | 0.98 | 0.91 | A   | 8.23   | 17.52 | 0.00 | P   | 142.83  | MOX2      | 3q12-q13      |
| 227952_at    | 0.97 | 0.88 | A   | 14.33  | 17.38 | 0.00 | P   | 244.07  | ZNF595    | 4p16.3        |
| 215143_at    | 0.99 | 0.94 | A   | 20.87  | 17.38 | 0.00 | P   | 357.70  | FLJ36166  | 7q22.1        |
| 203299_s_at  | 0.94 | 0.83 | A   | 33.77  | 17.36 | 0.00 | P   | 578.43  | AP1S2     | xp22.31       |
| 207671_s_at  | 0.90 | 0.77 | A   | 21.10  | 17.36 | 0.00 | P   | 356.50  | VMD2      | 11q13         |
| 215719_x_at  | 0.92 | 0.80 | PA  | 11.33  | 17.27 | 0.00 | P   | 195.33  | TNFRSF6   | 10q24.1       |
| 207057_at    | 0.99 | 0.93 | A   | 25.10  | 17.26 | 0.00 | P   | 426.60  | SLC16A7   | 12q13         |
| 225800_at    | 0.87 | 0.74 | A   | 6.47   | 17.18 | 0.00 | PMA | 110.80  | JAZF1     | 7p15.2-p15.1  |
| 1564954_at   | 0.96 | 0.86 | A   | 5.37   | 17.06 | 0.00 | PMA | 91.03   | C21orf90  | 21q22.3       |
| 210330_at    | 0.96 | 0.86 | A   | 14.70  | 17.02 | 0.00 | P   | 247.57  | SGCD      | 5q33-q34      |
| 1565703_at   | 0.97 | 0.87 | A   | 1.83   | 17.02 | 0.01 | PA  | 31.97   | MADH4     | 18q21.1       |
| 1560240_at   | 0.92 | 0.80 | A   | 2.87   | 16.86 | 0.00 | P   | 48.40   |           |               |
| 231688_at    | 0.85 | 0.73 | A   | 2.00   | 16.74 | 0.01 | P   | 35.10   |           |               |
| 201654_s_at  | 0.91 | 0.79 | A   | 2.00   | 16.71 | 0.01 | PA  | 34.27   | HSPG2     | 1p36.1-p35    |
| 204638_at    | 1.00 | 0.96 | PA  | 76.77  | 16.69 | 0.00 | P   | 1263.67 | ACPF5     | 9p13.3-p13.2  |
| 222846_at    | 1.00 | 0.81 | P   | 24.27  | 16.62 | 0.00 | P   | 400.36  | RAB8B     | 15q21         |
| 228683_s_at  | 1.00 | 0.98 |     |        |       |      |     |         |           |               |

|              |      |      |       |        |       |      |       |         |           |               |
|--------------|------|------|-------|--------|-------|------|-------|---------|-----------|---------------|
| 230251_at    | 0.94 | 0.83 | M.A   | 7.60   | 15.26 | 0.00 | P     | 113.87  | C6orf176  | 6q27          |
| 216254_at    | 0.89 | 0.76 | A     | 2.07   | 15.22 | 0.00 | P     | 31.30   |           |               |
| 203650_at    | 1.00 | 0.95 | P     | 25.20  | 15.01 | 0.00 | P     | 373.47  | PROCR     | 20q11.2       |
| 240772_at    | 0.90 | 0.79 | A     | 2.07   | 14.97 | 0.01 | PA    | 31.37   |           |               |
| 238067_at    | 0.87 | 0.73 | A     | 5.20   | 14.94 | 0.00 | P     | 77.60   | FLJ20298  | xq22.3        |
| 210762_s_at  | 0.98 | 0.91 | A     | 29.20  | 14.80 | 0.00 | P     | 424.23  | DLC1      | 8p22          |
| 215960_at    | 1.00 | 0.96 | A     | 25.27  | 14.79 | 0.00 | P     | 368.73  | SLC5A4    | 2q12.2-q12.3  |
| 219742_at    | 0.98 | 0.91 | P.A   | 37.63  | 14.73 | 0.00 | P     | 546.90  | MGC10772  | 5q35.3        |
| 223170_at    | 0.95 | 0.84 | A     | 62.60  | 14.71 | 0.00 | P     | 895.47  | FZP564K15 | 17q12         |
| 231299_at    | 0.92 | 0.81 | A     | 17.37  | 14.60 | 0.00 | P     | 252.80  | CENTG3    | 7q36.1        |
| 226066_at    | 0.99 | 0.95 | P     | 251.90 | 14.52 | 0.00 | P     | 3590.00 | MITF      | 3p14.2-p14.1  |
| 223657_at    | 0.99 | 0.91 | A     | 42.53  | 14.50 | 0.00 | P     | 604.47  | MGC10820  | 1p34.3        |
| 206806_at    | 0.96 | 0.85 | A     | 14.20  | 14.49 | 0.00 | P     | 200.67  | DKI1      | 7q32.3-q33    |
| 223891_at    | 0.99 | 0.92 | A     | 4.10   | 14.47 | 0.00 | P     | 58.47   | KCNOX5    | 6q14          |
| 201645_at    | 1.00 | 0.96 | P     | 114.37 | 14.29 | 0.00 | P.M.A | 1608.83 | TNC       | 9q33          |
| 220488_s_at  | 1.00 | 0.95 | P.A   | 48.90  | 14.28 | 0.00 | P     | 689.60  | BCAS3     | 17q23         |
| 210471_s_at  | 0.98 | 0.90 | A     | 20.80  | 14.26 | 0.00 | P     | 293.50  | KCNAB1    | 3q26.1        |
| 212349_at    | 0.98 | 0.90 | P     | 41.70  | 14.14 | 0.00 | P     | 577.10  | FBXL7     | 5p15.1        |
| 226057_at    | 0.98 | 0.90 | A     | 7.93   | 14.11 | 0.00 | P     | 110.33  | CDGAP     | 3p13.33       |
| 204527_at    | 1.00 | 0.98 | P     | 104.40 | 14.09 | 0.00 | P     | 1448.50 | MYO5A     | 15q21         |
| 223618_at    | 0.96 | 0.85 | A     | 20.40  | 14.09 | 0.00 | P     | 280.67  | FMN2      | 1q43          |
| 1554701_a_at | 1.00 | 0.98 | P     | 152.73 | 14.04 | 0.00 | P     | 2114.43 | TBC1D16   | 17q25.3       |
| 212664_at    | 1.00 | 0.97 | A     | 72.90  | 14.01 | 0.00 | P     | 1006.23 | TUBB5     | 19p13.3       |
| 220494_at    | 0.91 | 0.80 | A     | 51.73  | 13.97 | 0.00 | P     | 706.80  | MICLN3    | 1p22.3        |
| 208978_at    | 0.98 | 0.90 | A     | 50.50  | 13.93 | 0.00 | P     | 698.13  | CRIP2     | 14q32.3       |
| 220234_at    | 0.99 | 0.95 | A     | 29.77  | 13.91 | 0.00 | P     | 407.83  | CA8       | 8q11-q12      |
| 227561_at    | 1.00 | 0.98 | P.A   | 43.30  | 13.88 | 0.00 | P     | 592.07  | DDR2      | 1q12-q23      |
| 225442_at    | 0.97 | 0.87 | A     | 33.77  | 13.80 | 0.00 | P     | 460.40  | DDR2      | 1q12-q23      |
| 235333_at    | 1.00 | 0.95 | P     | 45.00  | 13.70 | 0.00 | P     | 506.90  | BAGALTB   | 18q11         |
| 204774_at    | 1.00 | 0.98 | P     | 16.53  | 13.65 | 0.00 | P     | 221.90  | EV12A     | 17q11.2       |
| 215617_at    | 0.96 | 0.85 | P.A   | 9.43   | 13.64 | 0.00 | P     | 126.57  |           |               |
| 214449_s_at  | 0.92 | 0.81 | P     | 48.17  | 13.64 | 0.00 | P     | 652.70  | RHOQ      | 2p21          |
| 205321_at    | 0.97 | 0.87 | A     | 70.30  | 13.63 | 0.00 | P     | 951.67  | EIF2S3    | q22.2-q22.1   |
| 210854_x_at  | 1.00 | 0.96 | P.M.A | 192.43 | 13.60 | 0.00 | P     | 1600.70 | SLC6A8    |               |
| 216033_s_at  | 0.97 | 0.88 | A     | 34.57  | 13.62 | 0.00 | P     | 464.60  | FYN       | 6q21          |
| 1555579_s_at | 0.99 | 0.92 | M.A   | 20.73  | 13.55 | 0.00 | P     | 276.90  | PTPRM     | 18p11.2       |
| 214297_at    | 1.00 | 0.95 | A     | 17.73  | 13.45 | 0.00 | P     | 236.97  | CSPG4     | 15q23         |
| 223614_at    | 1.00 | 0.98 | P.A   | 39.23  | 13.39 | 0.00 | P     | 517.53  | KFZp761D1 | 8q21.3        |
| 210135_s_at  | 0.95 | 0.85 | A     | 17.97  | 13.38 | 0.00 | P     | 236.14  | SHOX2     | 3q25-q26.1    |
| 229942_at    | 0.96 | 0.87 | A     | 22.23  | 13.32 | 0.00 | P     | 295.80  |           |               |
| 210139_s_at  | 0.99 | 0.92 | P     | 117.33 | 13.31 | 0.00 | P     | 1538.77 | PMP22     | 17p12-p11.2   |
| 44783_s_at   | 1.00 | 0.96 | P     | 66.23  | 13.30 | 0.00 | P     | 865.30  | HEY1      | 8q21          |
| 221667_s_at  | 0.88 | 0.76 | A     | 8.50   | 13.30 | 0.00 | P     | 117.70  | HSPB8     | 12q24.23      |
| 244623_at    | 0.98 | 0.91 | A     | 47.53  | 13.30 | 0.00 | P     | 621.63  |           |               |
| 227761_at    | 0.98 | 0.89 | P     | 179.03 | 13.06 | 0.00 | P     | 2311.47 | MYO5A     | 15q21         |
| 1554758_a_at | 0.99 | 0.94 | A     | 4.00   | 13.05 | 0.00 | P.M   | 51.87   | CD99L2    | xq28          |
| 205968_at    | 0.97 | 0.87 | A     | 20.53  | 12.99 | 0.00 | P     | 261.60  | KCNK3     | 2p24          |
| 214040_x_at  | 0.93 | 0.82 | A     | 23.43  | 12.76 | 0.00 | P     | 295.30  | GSN       | 9q33          |
| 202185_at    | 0.99 | 0.95 | P     | 342.40 | 12.68 | 0.00 | P     | 4257.60 | PLD3      | 7q32          |
| 1554522_at   | 0.98 | 0.90 | P.A   | 7.27   | 12.62 | 0.00 | P     | 90.60   | CNNM2     | 10q24.33      |
| 220167_s_at  | 1.00 | 0.99 | P     | 79.23  | 12.46 | 0.00 | P     | 970.83  | TP53TG3   | 16p13         |
| 200632_s_at  | 0.99 | 0.92 | P     | 72.57  | 12.44 | 0.00 | P     | 893.30  | NDRG1     | 8q24.3        |
| 200756_x_at  | 0.99 | 0.93 | M.A   | 142.30 | 12.41 | 0.00 | P     | 1741.63 | CALU      | 7q32          |
| 233931_at    | 1.00 | 0.98 | A     | 52.90  | 12.33 | 0.00 | P     | 635.60  |           |               |
| 208893_s_at  | 0.95 | 0.85 | A     | 27.43  | 12.31 | 0.00 | P     | 340.27  | DUSP6     | 12q22-q23     |
| 205439_at    | 0.90 | 0.77 | A     | 24.13  | 12.23 | 0.00 | P     | 292.33  | GSTT2     | 22q11.23      |
| 220451_s_at  | 0.97 | 0.88 | A     | 33.40  | 12.20 | 0.00 | P     | 401.63  | BIRC7     | 20q13.3       |
| 211925_s_at  | 0.98 | 0.90 | A     | 4.80   | 12.19 | 0.00 | P     | 57.80   | PLCB1     | 20p12         |
| 239565_at    | 0.90 | 0.79 | P.A   | 14.50  | 12.16 | 0.00 | P     | 117.73  | PCAF      | 3p24          |
| 228345_at    | 1.00 | 0.99 | A     | 52.50  | 12.07 | 0.00 | P     | 623.33  | IRF4      | 6p25-p23      |
| 208167_s_at  | 0.97 | 0.87 | A     | 9.77   | 12.02 | 0.00 | P     | 116.70  | MMP16     | 8q21          |
| 238622_at    | 0.97 | 0.88 | P.A   | 18.57  | 11.87 | 0.00 | P     | 218.43  | RAP2B     | 9q25.2        |
| 233062_at    | 0.97 | 0.86 | A     | 34.70  | 11.87 | 0.00 | P     | 410.30  | INP5F     | 10q26.13      |
| 232173_at    | 0.97 | 0.88 | A     | 29.57  | 11.83 | 0.00 | P     | 343.33  | LOC154796 | 7q34          |
| 209365_s_at  | 1.00 | 0.97 | P.M   | 145.27 | 11.79 | 0.00 | P     | 1691.90 | ECM1      | 1q21          |
| 201718_s_at  | 0.95 | 0.85 | A     | 14.87  | 11.78 | 0.00 | P     | 174.57  | EPB41L2   | 6q23          |
| 155717_a_at  | 0.99 | 0.94 | M.A   | 7.60   | 11.73 | 0.00 | P     | 88.27   | FLJ34064  | xq22.31       |
| 203320_at    | 0.90 | 0.80 | P     | 92.70  | 11.63 | 0.00 | P     | 1060.77 | LNK       | 12q24         |
| 209875_s_at  | 0.93 | 0.82 | P.A   | 14.50  | 11.58 | 0.00 | P     | 165.00  | SPP1      | 4q21-q25      |
| 204781_s_at  | 0.90 | 0.78 | A     | 16.33  | 11.55 | 0.00 | P     | 186.43  | TNFRSF6   | 10q24.1       |
| 202990_at    | 0.97 | 0.89 | P     | 56.97  | 11.51 | 0.00 | P     | 648.70  | PYGL      | 14q21-q22     |
| 227657_at    | 0.98 | 0.89 | A     | 5.33   | 11.49 | 0.00 | P     | 60.17   | RNF150    | 4q31.1        |
| 204469_at    | 0.91 | 0.80 | P.A   | 9.63   | 11.49 | 0.00 | P     | 108.20  | PTPRZ1    | 7q31.3        |
| 211340_s_at  | 0.99 | 0.93 | P     | 89.03  | 11.31 | 0.00 | P     | 999.27  | MCAM      | 11q23.3       |
| 225600_at    | 1.00 | 0.95 | A     | 41.07  | 11.30 | 0.00 | P     | 459.63  | LOC286144 | 8q22.1        |
| 206653_at    | 0.99 | 0.93 | P     | 73.30  | 11.26 | 0.00 | P     | 816.90  | POLR3G    | 5q14.3        |
| 214608_s_at  | 0.98 | 0.91 | A     | 16.10  | 11.24 | 0.00 | P     | 180.00  | EVA1      | 8q13.3        |
| 239418_at    | 0.99 | 0.93 | P     | 14.24  | 11.24 | 0.00 | P     | 371.61  | SLC5B84   | 7q33          |
| 209515_s_at  | 0.99 | 0.94 | P     | 210.80 | 11.23 | 0.00 | P     | 2335.17 | RAB27A    | 15q15-q21.1   |
| 230249_at    | 0.90 | 0.77 | A     | 3.87   | 11.23 | 0.00 | P     | 42.57   | KHDRBS3   | 8q24.2        |
| 209514_s_at  | 1.00 | 0.98 | P     | 252.33 | 11.21 | 0.00 | P     | 2781.03 | RAB27A    | 15q15-q21.1   |
| 236991_at    | 1.00 | 0.97 | A     | 8.37   | 11.20 | 0.00 | P     | 93.70   |           |               |
| 211177_x_at  | 0.94 | 0.83 | A     | 24.33  | 11.19 | 0.00 | P     | 265.93  | PTN       | 7q33-q34      |
| 203167_at    | 0.97 | 0.87 | A     | 102.70 | 11.18 | 0.00 | P     | 1137.80 | TIMP2     | 17q25         |
| 207233_s_at  | 1.00 | 0.96 | P     | 215.00 | 11.18 | 0.00 | P     | 2369.33 | MITF      | 3p14.2-p14.1  |
| 226641_at    | 0.99 | 0.93 | P     | 40.83  | 11.17 | 0.00 | P     | 448.30  | LOC91526  | 2q33.1        |
| 226225_at    | 0.99 | 0.95 | P     | 52.40  | 11.12 | 0.00 | P     | 575.17  | MCC       | 5q21-q22      |
| 206529_s_at  | 0.95 | 0.84 | P.M   | 15.87  | 11.06 | 0.00 | P     | 173.70  | SLC26A4   | 7q31          |
| 243348_at    | 0.95 | 0.84 | A     | 2.50   | 11.04 | 0.00 | P.A   | 27.63   |           |               |
| 205541_s_at  | 0.90 | 0.78 | A     | 8.53   | 11.04 | 0.00 | P     | 92.33   | GSPT2     | p11.23-p11.21 |
| 236636_at    | 0.90 | 0.77 | A     | 9.17   | 10.99 | 0.00 | P     | 100.20  |           |               |
| 219118_at    | 0.99 | 0.93 | P     | 58.87  | 10.98 | 0.00 | P     | 638.93  | FKBP11    | 12q13.12      |
| 37866_at     | 0.99 | 0.91 | A     | 72.57  | 10.98 | 0.00 | P     | 776.80  | PARVB     | 2q15.2-q13.33 |
| 214845_s_at  | 0.97 | 0.88 | P     | 179.73 | 10.94 | 0.00 | P     | 1943.43 | CALU      | 7q32          |
| 1566989_at   | 0.92 | 0.79 | A     | 20.50  | 10.90 | 0.00 | P.A   | 228.47  | ARID1B    | 6q25.1        |
| 220615_s_at  | 0.99 | 0.92 | P.A   | 37.07  | 10.89 | 0.00 | P     | 395.63  | MLSTD1    | 12p11.23      |
| 201010_s_at  | 0.90 | 0.77 | A     | 20.87  | 10.89 | 0.00 | P     | 225.43  | TXNIP     | 1q21          |
| 210233_at    | 0.98 | 0.89 | P.A   | 41.23  | 10.88 | 0.00 | P     | 444.60  | IL1RAP    | 3q28          |
| 219563_at    | 1.00 | 0.98 | P     | 77.53  | 10.87 | 0.00 | P     | 831.10  | C14orf139 | 14q32.2       |
| 230363_s_at  | 1.00 | 0.96 | P     | 60.37  | 10.84 | 0.00 | P     | 644.77  | INPP5F    | 10q26.13      |
| 155938_x_at  | 0.95 | 0.84 | M.A   | 7.93   | 10.81 | 0.00 | P     | 83.87   | VIM       | 10p13         |
| 224178_s_at  | 0.98 | 0.90 | A     | 4.17   | 10.80 | 0.01 | P     | 45.93   | SOX6      | 11p15.3       |
| 236154_at    | 0.97 | 0.88 | A     | 4.37   | 10.73 | 0.00 | P     | 45.97   | OKI       | 6p26.27       |
| 240770_at    | 1.00 | 0.97 | P     | 28.63  | 10.72 | 0.00 | P     | 301.50  | LOC134285 | 5q13.3        |
| 224822_at    | 0.99 | 0.92 | A     | 22.83  | 10.68 | 0.00 | P     | 240.80  | DLC1      | 8p22          |
| 210951_x_at  | 0.97 | 0.88 | P     | 293.23 | 10.68 | 0.00 | P     | 3059.97 | RAB27A    | 15q15-q21.1   |
| 220532_s_at  | 0.99 | 0.93 | A     | 7.00   | 10.59 | 0.00 | P.M   | 72.97   | LR8       | 7q36.1        |
| 228338_at    | 1.00 | 0.96 | A     | 38.00  | 10.58 | 0.00 | P     | 385.47  | KFZp76200 | 8q21.3        |
| 63305_at     | 0.99 | 0.92 | P     | 33.00  | 10.58 | 0.00 | P     | 345.07  | PKNOX2    | 11q24         |
| 202342_s_at  | 1.00 | 0.97 | P     | 179.10 | 10.55 | 0.00 | P     | 1863.10 | TRIM2     | 4q31.3        |
| 225798_at    | 0.98 | 0.91 | P.A   | 17.73  | 10.55 | 0.00 | P     | 184.00  | JAZF1     | 7p15.2-p15.1  |
| 235766_x_at  | 1.00 | 0.95 | P     | 122.73 | 10.43 | 0.00 | P     | 1265.40 | RAB27A    | 15q15-q21.1   |
| 203349_s_at  | 1.00 | 0.99 | P     | 50.17  | 10.32 | 0.00 | P     | 1359.30 | ETV5      | 3q28          |
| 37005_at     | 1.00 | 0.96 | P     | 245.60 | 10.38 | 0.00 | P     | 2511.33 | NBL1      | 3p6.13-p36.11 |
| 239296_at    | 0.96 | 0.86 | A     | 14.33  | 10.36 | 0.01 | P     | 148.37  |           |               |
| 228266_s_at  | 1.00 | 0.96 | A     | 12.03  | 10.24 | 0.00 | P     | 121.33  | HDGFRP3   | 15q11.2       |
| 1562730_a_at | 0.98 | 0.90 | A     | 15.37  | 10.23 | 0.00 | P     | 154.77  | SCGA      | 17q31         |
| 44790_s_at   | 0.97 | 0.88 | A     | 60.73  | 10.23 | 0.00 | P     | 107.70  | C13orf18  | 13q14.11      |
| 220272_at    |      |      |       |        |       |      |       |         |           |               |

|              |      |      |       |        |      |      |       |         |           |              |
|--------------|------|------|-------|--------|------|------|-------|---------|-----------|--------------|
| 231789_at    | 0.94 | 0.83 | A     | 6.97   | 9.86 | 0.00 | P     | 67.17   | PCDHB15   | 5q31         |
| 205383_s_at  | 1.00 | 0.98 | A     | 28.33  | 9.85 | 0.00 | P     | 275.03  | ZNF288    | 3q13.2       |
| 240492_at    | 1.00 | 0.97 | A     | 13.77  | 9.84 | 0.00 | P     | 133.83  |           |              |
| 231130_at    | 0.94 | 0.83 | A     | 13.80  | 9.82 | 0.00 | P     | 132.73  | FKBP7     | 2q31.3       |
| 201655_s_at  | 0.98 | 0.90 | M.A   | 15.73  | 9.79 | 0.00 | P     | 152.53  | HSPG2     | 1p36.1-p35   |
| 1555503_a_at | 0.92 | 0.79 | A     | 4.67   | 9.78 | 0.00 | P     | 45.27   | HUCEP11   | 1q32.1       |
| 228442_at    | 0.97 | 0.89 | A     | 49.37  | 9.78 | 0.00 | P     | 477.70  | NFATC2    | 0q13.2-q13.3 |
| 203821_at    | 0.96 | 0.87 | A     | 50.37  | 9.74 | 0.00 | P     | 483.43  | DTR       | 5q23         |
| 235777_at    | 0.90 | 0.79 | A     | 14.70  | 9.73 | 0.00 | P     | 146.93  | LOC91526  | 2q33.1       |
| 241456_at    | 0.96 | 0.87 | A     | 6.47   | 9.72 | 0.00 | PM    | 62.57   |           |              |
| 238452_at    | 1.00 | 0.96 | A     | 8.97   | 9.69 | 0.00 | P     | 85.67   | FLJ31052  | 1q23.1       |
| 229347_at    | 0.92 | 0.80 | A     | 23.83  | 9.67 | 0.00 | P     | 225.10  |           |              |
| 203607_at    | 1.00 | 0.96 | P     | 159.93 | 9.63 | 0.00 | P     | 157.87  | INP5F     | 10q26.13     |
| 212730_at    | 1.00 | 0.97 | P     | 168.50 | 9.62 | 0.00 | P     | 1592.23 | DMN       | 15q26.3      |
| 225571_at    | 1.00 | 0.97 | P     | 17.47  | 9.61 | 0.01 | P     | 167.90  | LIFR      | 5p13-p12     |
| 231490_at    | 0.97 | 0.89 | A     | 5.93   | 9.54 | 0.00 | P     | 56.20   |           |              |
| 205673_s_at  | 0.94 | 0.84 | P     | 31.93  | 9.50 | 0.00 | P     | 301.10  | ASB9      | xp21.3       |
| 225622_at    | 1.00 | 0.96 | P.A   | 28.47  | 9.48 | 0.00 | P     | 265.00  | PAG       | 8q21.12      |
| 221643_s_at  | 0.90 | 0.77 | P.A   | 29.90  | 9.48 | 0.00 | P     | 282.17  | RERE      | 10q1.1-q36.2 |
| 212003_at    | 0.96 | 0.85 | A     | 35.07  | 9.44 | 0.00 | P     | 336.43  | FZp566C04 | 1p36.13      |
| 235104_at    | 0.94 | 0.84 | A     | 15.30  | 9.43 | 0.00 | P     | 143.90  | LRAP      | 16           |
| 1558748_at   | 1.00 | 0.96 | A     | 17.50  | 9.41 | 0.00 | P     | 162.40  |           |              |
| 240395_at    | 0.98 | 0.90 | P.A   | 9.37   | 9.38 | 0.00 | P     | 87.13   |           |              |
| 219367_s_at  | 1.00 | 0.95 | A     | 49.03  | 9.37 | 0.00 | P     | 453.33  |           |              |
| 232958_at    | 0.99 | 0.93 | A     | 6.50   | 9.36 | 0.00 | P     | 60.90   | NRP2      | 2q33.3       |
| 232682_at    | 0.95 | 0.84 | P     | 88.53  | 9.35 | 0.00 | P     | 821.20  | PYGL      | 14q21-q22    |
| 226587_at    | 0.99 | 0.92 | A     | 10.77  | 9.35 | 0.00 | P     | 98.77   | FLJ10116  | 2q35         |
| 232773_at    | 0.99 | 0.93 | P.A   | 21.73  | 9.35 | 0.00 | P     | 201.27  |           |              |
| 235371_at    | 0.99 | 0.93 | P.A   | 73.57  | 9.34 | 0.00 | P     | 677.41  |           |              |
| 213436_at    | 0.98 | 0.90 | P.A   | 8.37   | 9.33 | 0.00 | P     | 77.23   | CNR1      | 3p14.2       |
| 1557290_at   | 1.00 | 0.97 | A     | 6.57   | 9.33 | 0.00 | P.M.A | 60.30   |           | 6q14-q15     |
| 209235_at    | 0.92 | 0.80 | A     | 60.97  | 9.31 | 0.00 | P     | 570.20  | CLCN7     | 16p13        |
| 217999_at    | 1.00 | 0.96 | P     | 95.53  | 9.25 | 0.00 | P     | 868.67  | DHRS8     | 4q22.1       |
| 218878_at    | 0.99 | 0.92 | A     | 13.60  | 9.24 | 0.00 | P     | 867.80  | NES       | 1q23.1       |
| 1555434_a_at | 0.86 | 0.73 | A     | 29.70  | 9.21 | 0.01 | P     | 274.23  | SLC39A14  | 8p21.2       |
| 219257_s_at  | 1.00 | 0.95 | P     | 146.67 | 9.21 | 0.00 | P     | 1324.13 | SPHK1     | 17q25.2      |
| 203928_x_at  | 1.00 | 0.96 | A     | 18.57  | 9.17 | 0.00 | P.A   | 167.27  | MAPT      | 17q21.1      |
| 222851_at    | 0.98 | 0.90 | P.A   | 50.70  | 9.15 | 0.00 | P     | 459.20  | FLJ10997  | 3p12.1       |
| 239135_at    | 0.93 | 0.80 | A     | 40.80  | 9.10 | 0.00 | P     | 126.00  | FLJ11151  | 16p13.13     |
| 231972_at    | 0.99 | 0.91 | A     | 40.80  | 9.07 | 0.00 | P     | 364.30  |           |              |
| 228714_at    | 0.92 | 0.81 | A     | 15.57  | 9.06 | 0.00 | P     | 140.77  |           |              |
| 205110_s_at  | 0.98 | 0.91 | A     | 24.70  | 9.02 | 0.00 | P     | 218.40  | FGF13     | xq26.3       |
| 213371_at    | 0.99 | 0.94 | A     | 26.57  | 9.02 | 0.00 | P     | 237.10  | LD33      | 0q22.3-q23.2 |
| 1559969_a_at | 0.92 | 0.79 | P     | 13.60  | 9.02 | 0.00 | P.A   | 17.27   | UNC13C    | 15q21.1      |
| 203543_s_at  | 0.99 | 0.93 | A     | 13.00  | 9.00 | 0.00 | P     | 115.40  | BTEB1     | 9q13         |
| 41113_at     | 0.95 | 0.84 | A     | 7.97   | 8.99 | 0.00 | P     | 71.00   | ZNF500    | 16p13.3      |
| 225646_at    | 1.00 | 0.97 | P     | 137.13 | 8.99 | 0.00 | P     | 1213.67 | CTSC      | 1q14.1-q14.3 |
| 206453_s_at  | 0.99 | 0.92 | A     | 27.77  | 8.98 | 0.00 | P.A   | 245.37  | NDRG2     | 14q11.2      |
| 208670_s_at  | 0.98 | 0.91 | M.A   | 86.50  | 8.97 | 0.00 | P     | 768.20  | CRH1      | 5q21.1-q21.2 |
| 229146_at    | 0.94 | 0.84 | A     | 9.43   | 8.95 | 0.00 | P     | 83.80   | C7orf31   | 7p15.2       |
| 1556764_s_at | 0.98 | 0.91 | A     | 8.93   | 8.93 | 0.00 | P.A   | 78.33   |           |              |
| 216286_at    | 0.97 | 0.89 | A     | 10.30  | 8.92 | 0.00 | P     | 92.07   | SNRPN     | 15q12        |
| 201522_x_at  | 1.00 | 0.95 | P     | 70.87  | 8.91 | 0.00 | P     | 622.73  | LOC20086  | 3q11.2       |
| 235875_at    | 0.97 | 0.88 | P     | 10.50  | 8.91 | 0.00 | P     | 95.31   | KLF15     | 3q13-q21     |
| 231015_at    | 0.95 | 0.84 | A     | 41.37  | 8.91 | 0.00 | P     | 362.90  | RAB38     | 11q14        |
| 219412_at    | 0.99 | 0.93 | P     | 238.13 | 8.89 | 0.00 | P     | 2074.23 | PTN       | 7q33-q34     |
| 209465_x_at  | 0.94 | 0.83 | M.A   | 13.67  | 8.83 | 0.00 | P     | 118.17  | CLCN5     | 11.23-p11.22 |
| 206704_at    | 0.99 | 0.93 | P     | 58.90  | 8.82 | 0.00 | P     | 512.73  | TOSC      | 4q21.2       |
| 221601_s_at  | 1.00 | 0.96 | A     | 65.80  | 8.80 | 0.00 | P     | 482.40  | FKBP11    | 12q13.12     |
| 219117_s_at  | 0.99 | 0.93 | P     | 161.17 | 8.80 | 0.00 | P     | 1394.50 | SGCD      | 5q33-q34     |
| 213543_at    | 0.98 | 0.89 | A     | 12.80  | 8.72 | 0.00 | P     | 109.73  | AARSL     | 6p21.1       |
| 230024_at    | 0.87 | 0.74 | A     | 26.37  | 8.72 | 0.01 | P     | 233.03  | FBXO13    | 5q21.3       |
| 244360_at    | 0.96 | 0.86 | A     | 12.30  | 8.70 | 0.00 | P     | 104.93  | BN22      | 9q22.2       |
| 238478_at    | 0.98 | 0.89 | A     | 30.10  | 8.70 | 0.00 | P     | 300.37  | PTPRG     | 3p21-p14     |
| 204944_at    | 0.99 | 0.92 | M.A   | 34.97  | 8.70 | 0.00 | P     | 255.60  | SGCD      | 5q33-q34     |
| 214492_at    | 0.99 | 0.92 | A     | 29.83  | 8.68 | 0.00 | P     | 77.57   | LOC339263 | 17p11.2      |
| 228146_at    | 0.95 | 0.85 | A     | 9.13   | 8.67 | 0.00 | P.A   | 77.57   |           |              |
| 227176_at    | 0.97 | 0.88 | A     | 29.27  | 8.62 | 0.00 | P     | 249.73  | RaLp      | 5q21.1-q21.2 |
| 230338_at    | 0.96 | 0.87 | P.A   | 16.83  | 8.60 | 0.00 | P     | 142.87  | MPP1      | xq28         |
| 202974_at    | 0.99 | 0.95 | A     | 62.63  | 8.58 | 0.00 | P     | 530.73  | ANGPT1    | 8q22.3-q23   |
| 205609_at    | 0.96 | 0.85 | A     | 16.83  | 8.57 | 0.00 | P     | 143.03  |           |              |
| 239353_at    | 0.95 | 0.85 | A     | 12.73  | 8.55 | 0.00 | P     | 106.33  | HUCEP11   | 1q32.1       |
| 213096_at    | 0.99 | 0.93 | A     | 38.40  | 8.54 | 0.00 | P     | 324.53  | IMP3      | 7p11         |
| 216493_s_at  | 0.88 | 0.74 | A     | 6.70   | 8.53 | 0.00 | P.A   | 55.97   | EMILIN2   | 18p11.3      |
| 224374_s_at  | 1.00 | 0.97 | A     | 62.00  | 8.53 | 0.00 | P     | 519.80  | CDH19     | 18q22-q23    |
| 1555403_a_at | 0.92 | 0.80 | A     | 2.40   | 8.52 | 0.03 | P.A   | 22.70   | MITF      | 3p14.2-p14.1 |
| 1554874_at   | 0.99 | 0.94 | A     | 8.57   | 8.51 | 0.00 | P     | 72.23   | MAPT      | 17q21.1      |
| 206401_s_at  | 0.99 | 0.92 | A     | 14.87  | 8.50 | 0.00 | P.A   | 124.33  |           |              |
| 237803_s_at  | 0.99 | 0.95 | A     | 3.37   | 8.49 | 0.00 | P     | 28.20   |           |              |
| 205880_at    | 0.95 | 0.84 | A     | 16.83  | 8.49 | 0.00 | P     | 141.67  | PRKCM     | 14q11        |
| 212122_at    | 0.99 | 0.94 | P     | 31.93  | 8.48 | 0.00 | P     | 268.27  | RHOQ      | 2p21         |
| 219743_at    | 0.94 | 0.82 | A     | 9.73   | 8.48 | 0.00 | P     | 81.73   | HEY2      | q22.2-q22.33 |
| 232530_at    | 0.98 | 0.89 | A     | 27.23  | 8.45 | 0.00 | P     | 227.87  | PLD1      | 3q26         |
| 1552641_s_at | 1.00 | 0.96 | P.A   | 63.83  | 8.44 | 0.00 | P     | 536.63  | ATAD3B    | 16p13.3      |
| 244829_at    | 0.99 | 0.94 | P.A   | 62.47  | 8.44 | 0.00 | P     | 520.83  | MGC40222  | 6p24.1       |
| 206826_at    | 1.00 | 0.95 | P     | 16.90  | 8.43 | 0.00 | P     | 140.93  | PMP2      | 3q21.3-q22.1 |
| 222686_s_at  | 1.00 | 0.99 | A     | 84.43  | 8.39 | 0.00 | P     | 705.70  | FLJ11151  | 16p13.13     |
| 207084_at    | 0.87 | 0.76 | A     | 8.50   | 8.25 | 0.01 | P     | 69.70   | POU3F2    | 6q16         |
| 203920_at    | 0.96 | 0.85 | P.A   | 13.53  | 8.25 | 0.00 | P     | 110.10  | ANK2      | 4q22-q27     |
| 235287_at    | 0.98 | 0.89 | P.A   | 18.10  | 8.21 | 0.00 | P     | 147.93  | CDK6      | 7q21-q22     |
| 239034_at    | 0.98 | 0.91 | P.M   | 24.37  | 8.20 | 0.00 | P     | 197.60  | LOC203414 | xp11.3       |
| 214755_at    | 0.99 | 0.95 | A     | 51.80  | 8.18 | 0.00 | P     | 417.10  | UAP1L1    | 9q34.3       |
| 237630_s_at  | 0.91 | 0.79 | A     | 7.07   | 8.16 | 0.00 | P.A   | 57.67   |           |              |
| 217553_at    | 1.00 | 0.95 | A     | 36.30  | 8.14 | 0.00 | P     | 290.10  | MGC87042  | 7p15.3       |
| 235931_at    | 0.98 | 0.89 | P     | 52.80  | 8.13 | 0.00 | P     | 423.60  |           |              |
| 215977_x_at  | 0.92 | 0.82 | A     | 19.20  | 8.09 | 0.00 | P     | 154.43  | GK        | xp21.3       |
| 236610_at    | 0.94 | 0.83 | A     | 6.43   | 8.06 | 0.01 | P.A   | 53.00   | GDAP1     | 8q13.3       |
| 226269_at    | 0.99 | 0.92 | P     | 23.53  | 8.06 | 0.00 | P     | 187.67  | NUTD4     |              |
| 227683_s_at  | 0.87 | 0.73 | A     | 2.40   | 8.04 | 0.02 | P.A   | 20.40   | SFRS11    | 1p31         |
| 236948_x_at  | 0.94 | 0.83 | P.A   | 4.00   | 8.04 | 0.00 | P     | 32.67   | RAB27A    | 15q15-q21.1  |
| 222294_s_at  | 1.00 | 0.98 | P     | 122.43 | 8.04 | 0.00 | P     | 971.30  | TIMP2     | 17q25        |
| 224560_at    | 0.93 | 0.81 | P     | 303.17 | 7.98 | 0.00 | P     | 2399.10 |           |              |
| 216874_at    | 1.00 | 0.96 | A     | 15.13  | 7.98 | 0.00 | P     | 119.23  |           |              |
| 230645_at    | 0.94 | 0.83 | A     | 13.87  | 7.97 | 0.00 | P     | 109.20  | FRMD3     | 9q21.33      |
| 212631_at    | 0.99 | 0.95 | P     | 160.87 | 7.96 | 0.00 | P     | 1262.77 |           |              |
| 1569399_at   | 1.00 | 0.95 | A     | 31.83  | 7.95 | 0.00 | P     | 250.70  |           |              |
| 216192_at    | 0.97 | 0.87 | A     | 4.47   | 7.95 | 0.00 | P.A   | 35.27   | FABP7     | 6q22-q23     |
| 212545_s_at  | 0.94 | 0.82 | A     | 3.67   | 7.94 | 0.02 | P.A   | 31.37   | ZHX3      | 20q12        |
| 204105_s_at  | 0.94 | 0.83 | A     | 9.23   | 7.94 | 0.00 | P     | 71.73   | NRCAM     | 7q31.1-q31.2 |
| 205193_at    | 1.00 | 0.95 | P     | 214.87 | 7.94 | 0.00 | P     | 1682.40 | MAFF      | 22q13.1      |
| 226516_at    | 1.00 | 0.96 | A     | 176.37 | 7.85 | 0.00 | P     | 1363.00 | C19orf28  | 19p13.3      |
| 242116_x_at  | 0.94 | 0.83 | M.A   | 13.73  | 7.85 | 0.00 | P     | 107.27  |           |              |
| 215812_s_at  | 1.00 | 0.97 | A     | 86.30  | 7.85 | 0.00 | P     | 666.57  | SLC6A8    | xq21.2       |
| 203827_s_at  | 0.97 | 0.89 | A     | 11.17  | 7.82 | 0.00 | P.M.A | 90.17   | MMP14     | 14q22        |
| 211804_s_at  | 0.92 | 0.79 | P.A   | 47.60  | 7.81 | 0.00 | P     | 371.70  | CDK2      | 12q13        |
| 201810_s_at  | 0.99 | 0.93 | P     | 141.93 | 7.78 | 0.00 | P     | 1092.60 | SH3BP5    | 3p24.3       |
| 209032_s_at  | 0.90 | 0.79 | P.M.A | 35.60  | 7.78 | 0.00 | P     | 270.37  | IGSF4     | 11q23.2      |
| 235199_at    | 0.99 | 0.95 | A     | 21.43  | 7.77 | 0.00 | P.M   | 164.13  |           |              |
| 1561691_at   | 0.95 | 0.85 | P     | 31.13  | 7.75 | 0.00 | P     | 236.93  | LOC285735 | 6q23.1       |
| 235202_x_at  | 0.99 | 0.92 | A     | 17.20  | 7.73 | 0.00 | P     | 131.80  | IKIP      | 12q23.1      |
| 243041_s_at  | 0.93 | 0.81 | A     | 9.70   | 7.69 | 0.00 | P     | 74.43   | RBMS3     | 3p24-p23     |

|              |      |      |     |        |      |      |      |         |           |               |
|--------------|------|------|-----|--------|------|------|------|---------|-----------|---------------|
| 1554464_a_at | 0.97 | 0.88 | P   | 149.13 | 7.47 | 0.00 | P    | 1103.13 | CRTAP     | 3p22          |
| 210138_at    | 1.00 | 0.98 | PA  | 27.90  | 7.46 | 0.00 | P    | 204.83  | RGS20     | 8q12.1        |
| 1555542_at   | 0.99 | 0.92 | A   | 12.20  | 7.42 | 0.00 | P    | 89.30   | FLJ36748  | 5q33.1        |
| 204701_s_at  | 0.99 | 0.93 | A   | 17.53  | 7.41 | 0.01 | PA   | 130.47  | STOML1    | 15q24-q25     |
| 216252_x_at  | 0.96 | 0.85 | PA  | 22.67  | 7.39 | 0.00 | P    | 166.00  | TNFRSF6   | 10q24.1       |
| 213241_at    | 0.99 | 0.92 | A   | 26.20  | 7.38 | 0.00 | P    | 190.10  | PLXNC1    | 12q23.3       |
| 202468_s_at  | 1.00 | 0.98 | P   | 112.77 | 7.37 | 0.00 | P    | 816.93  | CTNNAL1   | 9q31.2        |
| 243366_s_at  | 0.90 | 0.79 | A   | 25.97  | 7.33 | 0.00 | P    | 188.67  | RP28      | 2q32.1        |
| 220175_at    | 1.00 | 1.00 | PA  | 152.90 | 7.29 | 0.00 | P    | 152.90  | G15orf28  | 19p13.3       |
| 45288_at     | 1.00 | 0.96 | P   | 57.93  | 7.29 | 0.00 | P    | 416.23  | ABHD6     | 3p21.2        |
| 227850_x_at  | 0.90 | 0.77 | A   | 3.83   | 7.28 | 0.00 | PM   | 28.30   | CDC42EP5  | 19q13.42      |
| 226252_at    | 0.99 | 0.93 | PA  | 21.33  | 7.26 | 0.00 | P    | 153.57  |           |               |
| 1554020_at   | 0.98 | 0.90 | A   | 79.87  | 7.25 | 0.00 | P    | 572.87  | BICD1     | 2p11.2-p11.1  |
| 210964_s_at  | 1.00 | 1.00 | A   | 126.43 | 7.24 | 0.00 | P    | 900.47  | GVG2      | 9q22.3        |
| 228728_at    | 0.95 | 0.83 | A   | 13.23  | 7.23 | 0.00 | PM   | 93.40   | FLJ21986  | 7q31.32       |
| 225925_s_at  | 0.99 | 0.92 | P   | 109.33 | 7.21 | 0.00 | P    | 774.20  | USP48     | 1p36.12       |
| 232023_at    | 0.99 | 0.94 | P   | 19.60  | 7.20 | 0.00 | P    | 139.43  | MGC26979  | 8q22.1        |
| 219260_s_at  | 0.96 | 0.86 | P   | 135.73 | 7.19 | 0.00 | P    | 966.67  | DERP6     | 17p13.2       |
| 226152_at    | 0.97 | 0.88 | P   | 55.63  | 7.18 | 0.00 | P    | 397.43  | TT07L1    | 14q32.12      |
| 206896_s_at  | 0.95 | 0.84 | PA  | 43.30  | 7.15 | 0.00 | P    | 303.03  | GNP7      | 19p13.3       |
| 219616_at    | 0.98 | 0.91 | A   | 58.37  | 7.14 | 0.00 | P    | 409.47  | FLJ21963  | 12q21.31      |
| 230372_at    | 0.95 | 0.84 | A   | 27.60  | 7.14 | 0.00 | P    | 192.10  | HAS2      | 8q24.12       |
| 226075_at    | 1.00 | 0.98 | P   | 69.10  | 7.14 | 0.00 | P    | 485.40  | SSB1      | 1p36.22       |
| 227231_at    | 0.99 | 0.92 | P   | 10.27  | 7.12 | 0.00 | P    | 72.10   | KIAA1211  | 4q12          |
| 212486_s_at  | 0.97 | 0.87 | M.A | 17.67  | 7.12 | 0.00 | P    | 123.50  | FYN       | 6q21          |
| 201811_x_at  | 1.00 | 0.98 | P   | 238.13 | 7.12 | 0.00 | P    | 1665.90 | SH3BP5    | 3p24.3        |
| 225540_at    | 1.00 | 0.98 | P   | 114.27 | 7.12 | 0.00 | P    | 799.40  | MAP2      | 2q34-q35      |
| 203501_at    | 0.93 | 0.82 | A   | 20.37  | 7.11 | 0.00 | P    | 143.57  | PGCP      | 8q22.2        |
| 1552475_at   | 0.97 | 0.88 | P   | 10.77  | 7.11 | 0.00 | P    | 82.77   |           | 2q23.1        |
| 238751_at    | 0.98 | 0.90 | A   | 21.57  | 7.10 | 0.00 | P    | 152.17  |           |               |
| 230741_at    | 1.00 | 0.96 | A   | 26.53  | 7.10 | 0.00 | P    | 184.90  |           |               |
| 223510_at    | 0.99 | 0.93 | A   | 33.70  | 7.10 | 0.00 | P    | 237.37  | NRP2      | 2q33.3        |
| 207323_s_at  | 0.96 | 0.86 | M.A | 18.67  | 7.07 | 0.00 | P    | 131.07  | MBP       | 18q23         |
| 155139_s_at  | 0.92 | 0.81 | A   | 5.90   | 7.07 | 0.00 | PA   | 40.60   | ZAD01     | 8p11.3        |
| 217620_s_at  | 0.99 | 0.95 | P   | 35.43  | 7.07 | 0.00 | P    | 247.20  | PIK3CB    | 3q22.3        |
| 202896_s_at  | 0.99 | 0.92 | A   | 61.10  | 7.06 | 0.00 | P    | 423.70  | PTPNS1    | 20p13         |
| 1554332_a_at | 0.99 | 0.95 | P   | 92.80  | 7.06 | 0.00 | P    | 645.97  |           |               |
| 225881_at    | 1.00 | 0.95 | PA  | 171.40 | 7.06 | 0.00 | P    | 1192.23 | SLC35B4   | 7q33          |
| 242465_at    | 0.95 | 0.85 | A   | 10.77  | 7.04 | 0.00 | P    | 136.80  |           |               |
| 202375_at    | 0.97 | 0.88 | P   | 50.77  | 7.04 | 0.00 | P    | 352.70  | SEC24D    | 4q27          |
| 238459_x_at  | 0.95 | 0.84 | A   | 8.37   | 7.03 | 0.00 | P    | 57.37   | SPATA6    | 1p33          |
| 226273_at    | 0.99 | 0.94 | P   | 69.60  | 7.01 | 0.01 | P    | 486.33  | LOC158563 | xp11.23       |
| 204633_s_at  | 1.00 | 0.99 | PA  | 121.80 | 7.01 | 0.00 | P    | 838.43  | RPS6KA5   | 14q31-q32.1   |
| 227230_s_at  | 1.00 | 0.81 | A   | 20.43  | 7.01 | 0.00 | P    | 143.00  | KIAA1211  | 4q12          |
| 225727_at    | 1.00 | 0.96 | P   | 49.80  | 6.99 | 0.00 | P    | 344.00  | PLEKH11   | 14q24.1       |
| 203329_at    | 0.99 | 0.93 | PA  | 42.57  | 6.95 | 0.00 | P    | 292.77  | PTPRM     | 18p11.2       |
| 1567224_at   | 0.99 | 0.93 | PA  | 21.57  | 6.92 | 0.00 | P    | 147.30  |           |               |
| 203555_at    | 1.00 | 0.95 | P   | 29.00  | 6.92 | 0.00 | P    | 198.27  | ACADSB    | 10q25-q26     |
| 203705_s_at  | 0.98 | 0.91 | P   | 75.97  | 6.90 | 0.00 | P    | 518.93  | FZD7      | 2q33          |
| 1559634_at   | 0.94 | 0.84 | A   | 2.50   | 6.87 | 0.02 | PA   | 17.70   | CHRM3     | 1q41-q44      |
| 209123_at    | 1.00 | 0.98 | P   | 289.10 | 6.86 | 0.00 | P    | 1953.73 | QDPR      | 4p15.31       |
| 225045_at    | 0.96 | 0.86 | A   | 45.50  | 6.82 | 0.00 | P    | 308.90  | KIAA1212  | 2p16.3        |
| 1554717_a_at | 0.98 | 0.89 | A   | 12.00  | 6.82 | 0.00 | P    | 80.93   | PDE4D     | 5q12          |
| 205565_at    | 0.99 | 0.94 | P   | 62.30  | 6.81 | 0.00 | P    | 549.80  | ABHD2     | 15q26.1       |
| 239640_at    | 1.00 | 0.97 | A   | 2.80   | 6.77 | 0.01 | PA   | 19.40   |           | 7             |
| 209087_x_at  | 1.00 | 0.97 | P   | 89.97  | 6.77 | 0.00 | P    | 599.50  | MCAM      | 11q23.3       |
| 222755_s_at  | 0.99 | 0.92 | A   | 11.57  | 6.76 | 0.00 | PA   | 77.67   | KIAA1416  | 8q12.1        |
| 239081_at    | 0.95 | 0.84 | PA  | 27.90  | 6.74 | 0.00 | P    | 185.40  | BIRC2     | 11q22         |
| 235570_at    | 0.99 | 0.92 | P   | 23.77  | 6.72 | 0.00 | P    | 157.43  |           |               |
| 225793_at    | 1.00 | 0.97 | P   | 132.13 | 6.72 | 0.00 | P    | 874.70  | MGC46719  | 1q21.2        |
| 1556216_s_at | 0.99 | 0.94 | M.A | 8.03   | 6.72 | 0.01 | P    | 53.93   |           |               |
| 1553244_at   | 0.96 | 0.85 | A   | 17.23  | 6.71 | 0.01 | P    | 114.33  | FLJ34064  | xp22.31       |
| 202899_at    | 0.99 | 0.93 | A   | 63.03  | 6.71 | 0.00 | P    | 420.03  | SDC3      | 1pter-q22.3   |
| 1552275_s_at | 0.98 | 0.89 | A   | 29.83  | 6.69 | 0.00 | P    | 157.23  | PKK       | 3q21.2        |
| 207012_at    | 0.98 | 0.89 | A   | 29.83  | 6.68 | 0.00 | P    | 195.47  | MMP16     | 8q21          |
| 215728_s_at  | 0.95 | 0.85 | PA  | 66.47  | 6.67 | 0.00 | P    | 446.23  | BACH      | o36.31-p36.11 |
| 227965_at    | 0.98 | 0.91 | A   | 17.63  | 6.67 | 0.01 | P    | 116.67  | APC2      | 19p13.3       |
| 222963_at    | 1.00 | 0.99 | M.A | 32.83  | 6.64 | 0.00 | P    | 214.30  |           |               |
| 233405_at    | 0.97 | 0.87 | A   | 2.73   | 6.62 | 0.00 | PA   | 17.97   | KIAA0256  | 15q15.3       |
| 223837_at    | 1.00 | 0.95 | A   | 37.37  | 6.62 | 0.00 | P    | 243.77  | GULP1     | 2q32.3-q33    |
| 224494_x_at  | 0.99 | 0.94 | A   | 21.30  | 6.61 | 0.00 | P    | 139.47  | DHRS10    | 19q13.33      |
| 1558404_at   | 0.99 | 0.92 | P   | 29.63  | 6.59 | 0.00 | P    | 191.63  |           |               |
| 233276_at    | 0.98 | 0.91 | A   | 23.97  | 6.59 | 0.00 | P    | 156.27  |           |               |
| 219853_at    | 1.00 | 0.96 | P   | 42.93  | 6.59 | 0.00 | P    | 270.63  | CEB1      | 4q22.1-q23    |
| 203518_at    | 0.99 | 0.94 | P   | 105.63 | 6.59 | 0.00 | P    | 688.03  | CHS1      | 1q42.1-q42.2  |
| 229568_at    | 1.00 | 0.97 | A   | 44.13  | 6.58 | 0.00 | P    | 285.93  | MOBK2B    | 9p21.1        |
| 214336_s_at  | 0.93 | 0.80 | P   | 41.83  | 6.58 | 0.01 | P    | 283.10  | COPA      | 1q23-q25      |
| 205991_s_at  | 1.00 | 0.98 | P   | 31.47  | 6.57 | 0.00 | P    | 204.87  | PRRX1     | 1q24          |
| 233009_at    | 0.94 | 0.83 | A   | 60.07  | 6.54 | 0.00 | P    | 385.73  |           |               |
| 216048_s_at  | 0.96 | 0.85 | P   | 96.57  | 6.54 | 0.00 | P    | 625.83  | RHOBTB3   | 5q15          |
| 210105_s_at  | 0.99 | 0.92 | P   | 159.10 | 6.54 | 0.00 | P    | 1023.13 | FYN       | 6q21          |
| 228158_at    | 0.99 | 0.92 | A   | 55.40  | 6.53 | 0.00 | P    | 356.20  |           |               |
| 207425_s_at  | 0.98 | 0.89 | PA  | 33.90  | 6.53 | 0.00 | P    | 219.37  | MSF       | 17q25         |
| 203711_s_at  | 0.99 | 0.94 | P   | 248.27 | 6.51 | 0.00 | P    | 1599.53 | HIBCH     | 2p32.3        |
| 205234_at    | 0.99 | 0.92 | PA  | 19.53  | 6.51 | 0.00 | P    | 126.80  | SLC16A4   | 1p13.2        |
| 230395_at    | 0.99 | 0.93 | A   | 16.40  | 6.51 | 0.00 | PA   | 105.13  |           |               |
| 226084_at    | 0.93 | 0.81 | PA  | 14.30  | 6.50 | 0.00 | P    | 90.53   | MAP1B     | 5q13          |
| 215945_s_at  | 0.98 | 0.89 | P   | 46.37  | 6.49 | 0.00 | P    | 296.43  | TRIM2     | 4q31.3        |
| 225974_at    | 0.97 | 0.88 | P   | 101.73 | 6.49 | 0.00 | P    | 653.70  | FZD7      | 2q21.1        |
| 219372_at    | 1.00 | 0.96 | P   | 161.90 | 6.49 | 0.00 | P    | 1035.47 | CDV-1     | 12q24.13      |
| 242836_at    | 1.00 | 0.98 | P   | 22.53  | 6.49 | 0.00 | P    | 143.90  |           |               |
| 212098_at    | 0.99 | 0.94 | P   | 261.23 | 6.44 | 0.00 | P    | 1651.37 | LOC151162 | 2q21.3        |
| 219451_at    | 0.95 | 0.85 | A   | 47.63  | 6.44 | 0.00 | P    | 302.33  | MSRB      | 10p12         |
| 240120_at    | 0.98 | 0.90 | A   | 11.73  | 6.41 | 0.00 | P    | 76.00   |           |               |
| 227221_at    | 0.96 | 0.85 | PA  | 41.73  | 6.39 | 0.00 | P    | 263.97  |           |               |
| 217781_s_at  | 0.98 | 0.90 | P   | 434.60 | 6.38 | 0.00 | P    | 2739.20 | ZFP106    | 15q14         |
| 219759_at    | 0.99 | 0.95 | A   | 25.73  | 6.37 | 0.00 | P    | 161.60  | LRAP      | 16            |
| 207060_at    | 1.00 | 0.97 | A   | 17.20  | 6.37 | 0.00 | PM.A | 107.97  | ENZ       | 7q36          |
| 205097_at    | 0.97 | 0.88 | P   | 194.67 | 6.34 | 0.00 | P    | 1220.20 | SLC26A2   | 5q31-q34      |
| 224668_at    | 0.95 | 0.83 | A   | 23.07  | 6.31 | 0.00 | PA   | 142.30  | C20orf35  | 20q13.12      |
| 237817_at    | 0.98 | 0.90 | P   | 24.80  | 6.30 | 0.00 | P    | 154.70  | SSR3      | 3q25.31       |
| 232127_at    | 0.98 | 0.91 | P   | 44.70  | 6.27 | 0.01 | P    | 280.50  | CLCN5     | p11.23-p11.22 |
| 211603_s_at  | 0.98 | 0.91 | PA  | 83.90  | 6.27 | 0.00 | P    | 516.37  | ETV4      | 7q21          |
| 210948_s_at  | 0.99 | 0.94 | A   | 21.07  | 6.26 | 0.00 | P    | 129.70  | LEF1      | 4q23-q25      |
| 1554272_at   | 0.93 | 0.83 | A   | 2.83   | 6.26 | 0.00 | PA   | 17.83   | LRAP      | 16            |
| 238621_at    | 0.95 | 0.85 | A   | 32.93  | 6.24 | 0.00 | P    | 202.43  | FMN       | 15q13.2       |
| 229253_at    | 0.97 | 0.87 | P   | 146.77 | 6.23 | 0.00 | P    | 895.27  | CTMP      | 1q21          |
| 226059_at    | 0.97 | 0.87 | A   | 33.87  | 6.23 | 0.00 | P    | 208.63  | FLJ12770  | 1q23.1        |
| 221953_s_at  | 0.92 | 0.82 | P   | 11.63  | 6.22 | 0.00 | P    | 511.50  | MMP24     | 2q21.2        |
| 206661_at    | 0.92 | 0.79 | A   | 11.63  | 6.22 | 0.00 | P    | 72.20   | DRF1      | 17q21.31      |
| 240264_at    | 0.96 | 0.87 | A   | 9.40   | 6.21 | 0.00 | P    | 57.13   |           |               |
| 226281_at    | 0.98 | 0.91 | P   | 56.27  | 6.21 | 0.00 | P    | 341.80  | DNER      | 2q37.1        |
| 241972_at    | 1.00 | 0.96 | A   | 21.67  | 6.18 | 0.00 | P    | 131.73  | LOC401588 | xp11.3        |
| 226022_at    | 0.98 | 0.96 | P   | 659.60 | 6.18 | 0.00 | P    | 1581.53 | SASH1     | 6p21.3        |
| 208875_s_at  | 0.98 | 0.91 | PA  | 105.90 | 6.18 | 0.00 | P    | 646.63  | PAK2      | 3q29          |
| 220079_s_at  | 0.99 | 0.93 | P   | 190.13 | 6.18 | 0.00 | P    | 1154.93 | USP48     | 1p36.12       |
| 200755_s_at  | 0.98 | 0.90 | P   | 468.70 | 6.17 | 0.00 | P    | 2855.27 | CALU      | 7q32          |
| 200744_s_at  | 0.98 | 0.91 | P   | 294.07 | 6.16 | 0.00 | P    | 1611.53 | GNB1      | 1p36.33       |
| 225575_at    | 0.99 | 0.93 | A   | 21.50  | 6.15 | 0.00 | P    | 313.00  | LIFR      | 5p13-p12      |
| 1564479_a_at | 1.00 | 0.99 | A   | 59.87  | 6.15 | 0.00 | P    | 363.67  |           |               |
| 208892_s_at  | 0.98 |      |     |        |      |      |      |         |           |               |

|              |      |      |       |        |      |      |       |         |           |              |
|--------------|------|------|-------|--------|------|------|-------|---------|-----------|--------------|
| 226633_at    | 0.99 | 0.92 | P     | 171.90 | 5.99 | 0.00 | P     | 1008.67 | RAB8B     | 15q22.1      |
| 218514_at    | 1.00 | 0.99 | P     | 88.63  | 5.99 | 0.00 | P     | 522.27  | FLJ10587  | 17q23.2      |
| 236798_at    | 0.99 | 0.92 | P     | 65.90  | 5.87 | 0.00 | P     | 385.97  |           |              |
| 235046_at    | 0.99 | 0.93 | P     | 105.80 | 5.96 | 0.00 | P     | 623.80  |           |              |
| 214830_at    | 0.99 | 0.95 | P     | 69.70  | 5.95 | 0.00 | P     | 409.33  | SLC38A6   | 14q23.1      |
| 212120_at    | 1.00 | 0.98 | P     | 254.90 | 5.94 | 0.00 | P     | 1490.63 | PIGF      | 2p21-p16     |
| 223703_at    | 0.98 | 0.89 | PA    | 36.00  | 5.93 | 0.00 | P     | 208.47  | C10orf11  | 10q22.3      |
| 226038_at    | 1.00 | 0.98 | P     | 75.23  | 5.91 | 0.00 | P     | 439.80  | FLJ23749  | 8p23.1       |
| 1564911_at   | 0.94 | 0.83 | PA    | 40.80  | 5.90 | 0.00 | P     | 241.30  | MATR3     | 5q31.3       |
| 1560011_at   | 0.94 | 0.81 | A     | 16.03  | 5.90 | 0.00 | P     | 93.67   | PSCA      | 8q24.2       |
| 220205_at    | 0.99 | 0.93 | PA    | 11.03  | 5.89 | 0.00 | P     | 64.33   | TPTE      | 21p11        |
| 222407_s_at  | 0.98 | 0.91 | P     | 345.23 | 5.87 | 0.00 | P     | 2005.10 | ZFP106    | 15q14        |
| 228490_at    | 0.99 | 0.94 | P     | 75.27  | 5.84 | 0.00 | P     | 433.07  | ABHD2     | 15q26.1      |
| 209862_s_at  | 0.99 | 0.94 | P     | 60.97  | 5.84 | 0.00 | P     | 351.93  | FADS1     | 1q12.2-q13.1 |
| 1562657_a_at | 1.00 | 0.96 | P.M.A | 59.37  | 5.83 | 0.00 | P     | 341.03  | C10orf90  | 10q26.2      |
| 224045_x_at  | 0.96 | 0.87 | A     | 7.13   | 5.83 | 0.00 | PA    | 40.77   | C18orf2   | 18p11        |
| 204920_at    | 0.97 | 0.89 | A     | 24.47  | 5.80 | 0.00 | P     | 140.20  | CPS1      | 2q35         |
| 1773_at      | 0.97 | 0.88 | A     | 55.30  | 5.79 | 0.00 | P     | 318.67  | FN1B      | 14q23-q24    |
| 225717_at    | 0.99 | 0.94 | P     | 77.17  | 5.79 | 0.00 | P     | 440.93  | KIAA1715  | 2q31         |
| 213005_s_at  | 1.00 | 0.98 | P     | 252.33 | 5.79 | 0.00 | P     | 1437.73 | ANKRD15   | 9p24.3       |
| 229487_at    | 0.95 | 0.84 | A     | 19.17  | 5.78 | 0.00 | P     | 110.13  | EBF       | 5q34         |
| 235733_at    | 0.98 | 0.92 | M     | 82.70  | 5.77 | 0.00 | P     | 472.17  |           |              |
| 218610_s_at  | 0.98 | 0.89 | P     | 23.80  | 5.75 | 0.00 | P     | 135.87  | FLJ11151  | 16p13.13     |
| 224775_at    | 0.99 | 0.94 | P     | 255.03 | 5.75 | 0.00 | P     | 1440.57 | FZP588M11 | 8p11.21      |
| 201860_s_at  | 1.00 | 0.99 | P     | 72.17  | 5.73 | 0.00 | P     | 406.63  | PLAT      | 8p12         |
| 233092_s_at  | 0.96 | 0.86 | A     | 10.43  | 5.73 | 0.00 | P     | 59.43   | KFPZ434B0 | 13           |
| 223266_at    | 0.99 | 0.95 | PA    | 184.83 | 5.72 | 0.00 | P     | 1044.83 | ALS2CR2   | 2q33-q34     |
| 209936_at    | 0.97 | 0.89 | A     | 12.30  | 5.72 | 0.00 | PA    | 66.90   | RBMS      | 3p21.3       |
| 1558410_s_at | 0.98 | 0.87 | P     | 130.97 | 5.72 | 0.00 | P     | 73.87   | KRTAP19-1 | 21q22.2      |
| 209610_s_at  | 1.00 | 0.96 | P     | 374.27 | 5.72 | 0.00 | P     | 2110.57 | SLC1A4    | 2p15-p13     |
| 212909_at    | 0.98 | 0.91 | A     | 35.50  | 5.69 | 0.00 | P     | 199.63  | MGC29643  | 2q21.2       |
| 232004_at    | 1.00 | 0.99 | P     | 125.97 | 5.68 | 0.00 | P     | 704.07  | HNRPR     | 1p36.11      |
| 212110_at    | 0.99 | 0.93 | P     | 390.87 | 5.67 | 0.00 | P     | 2173.97 | SLC39A14  | 8p21.2       |
| 242842_at    | 0.97 | 0.87 | A     | 23.87  | 5.67 | 0.00 | P     | 132.65  | PARVG     | 22q13.2-q13  |
| 229024_at    | 0.99 | 0.91 | A     | 19.70  | 5.64 | 0.00 | P     | 109.63  |           |              |
| 230466_s_at  | 0.98 | 0.91 | P     | 192.23 | 5.64 | 0.00 | P     | 1072.67 |           |              |
| 225532_at    | 1.00 | 0.97 | P     | 180.73 | 5.63 | 0.00 | P     | 999.03  | CABLES1   | 18q11.2      |
| 224851_at    | 0.98 | 0.90 | P     | 183.33 | 5.61 | 0.00 | P     | 1019.87 | CDK6      | 7q21-q22     |
| 221552_at    | 0.97 | 0.87 | A     | 79.80  | 5.59 | 0.00 | P     | 438.53  | ABHD6     | 3p21.2       |
| 235696_at    | 0.95 | 0.85 | PA    | 10.50  | 5.59 | 0.00 | P     | 57.53   |           |              |
| 212423_at    | 1.00 | 0.96 | P.M.A | 70.23  | 5.59 | 0.00 | P     | 386.73  | C10orf56  | 10q23.1      |
| 205501_at    | 0.98 | 0.91 | M.A   | 6.00   | 5.58 | 0.00 | P     | 32.87   |           |              |
| 215415_s_at  | 0.99 | 0.94 | A     | 18.90  | 5.58 | 0.00 | P     | 105.57  | CHS1      | 1q42.1-q42.2 |
| 235051_at    | 0.96 | 0.86 | P     | 130.97 | 5.57 | 0.00 | P     | 314.87  | C3orf6    | 3q28         |
| 222378_at    | 0.98 | 0.89 | A     | 12.83  | 5.55 | 0.01 | PM    | 71.17   |           |              |
| 232269_x_at  | 1.00 | 0.98 | P     | 147.80 | 5.55 | 0.00 | P     | 808.50  | C16orf23  | 16p13.3      |
| 238530_at    | 0.97 | 0.88 | P     | 82.00  | 5.54 | 0.00 | P     | 450.57  | NNT       | 5p13.1-Scen  |
| 207325_s_at  | 0.99 | 0.95 | P     | 315.67 | 5.54 | 0.00 | P     | 1723.50 | MAGEA1    | xq28         |
| 1556283_s_at | 0.99 | 0.94 | A     | 23.27  | 5.54 | 0.00 | P     | 126.87  | FGFR10P2  | 12p12.1      |
| 236220_at    | 0.99 | 0.93 | A     | 10.73  | 5.53 | 0.00 | P     | 58.23   |           |              |
| 228602_at    | 0.99 | 0.92 | PA    | 41.47  | 5.53 | 0.00 | P     | 227.03  | SGCD      | 5q33-q34     |
| 243808_at    | 0.98 | 0.90 | A     | 16.70  | 5.52 | 0.01 | P     | 92.37   |           |              |
| 202912_at    | 1.00 | 0.97 | P.M.A | 132.67 | 5.51 | 0.00 | P     | 718.13  | ADM       | 11p15.4      |
| 223451_at    | 0.97 | 0.87 | P     | 34.77  | 5.49 | 0.00 | P     | 188.30  | UC1       |              |
| 216887_s_at  | 0.96 | 0.86 | A     | 28.80  | 5.49 | 0.00 | P     | 156.90  | LDB3      | 0q22.3-q23.2 |
| 224487_x_at  | 0.96 | 0.86 | PA    | 19.87  | 5.48 | 0.00 | P     | 108.33  | DHRS10    | 19q13.33     |
| 235719_at    | 0.92 | 0.81 | A     | 12.90  | 5.48 | 0.00 | P     | 70.77   | CYP4V2    | 4q35.1       |
| 242932_at    | 1.00 | 0.97 | P     | 54.70  | 5.48 | 0.01 | P     | 297.97  |           |              |
| 203457_at    | 0.99 | 0.94 | PA    | 65.63  | 5.48 | 0.00 | P     | 355.60  | STX7      | 6q23.1       |
| 228671_at    | 0.99 | 0.93 | PA    | 47.73  | 5.47 | 0.00 | P     | 258.17  |           | 1p36.22      |
| 243048_at    | 1.00 | 0.98 | A     | 71.53  | 5.47 | 0.00 | P     | 384.30  | CECR7     | 22q11.2      |
| 239598_s_at  | 1.00 | 0.95 | P     | 129.07 | 5.47 | 0.00 | P     | 696.27  | FLJ20481  | 16q13        |
| 216316_x_at  | 0.97 | 0.89 | A     | 24.53  | 5.47 | 0.00 | PA    | 133.57  | CK        | xp21.3       |
| 223451_at    | 0.97 | 0.89 | P     | 216.83 | 5.46 | 0.00 | P     | 2773.30 | TBC1D7    | 9p23         |
| 233350_s_at  | 1.00 | 0.97 | M.A   | 79.03  | 5.46 | 0.00 | P     | 425.13  | ZS1G11    | 3p21.31      |
| 219113_x_at  | 0.99 | 0.92 | A     | 31.87  | 5.45 | 0.00 | P     | 172.43  | DHRS10    | 19q13.33     |
| 241813_at    | 1.00 | 0.97 | PA    | 26.97  | 5.45 | 0.00 | P     | 144.77  | MBD1      | 18q21        |
| 222703_at    | 0.99 | 0.92 | P     | 55.77  | 5.45 | 0.00 | P     | 296.97  | C10orf10  | 10p15.3      |
| 219464_at    | 0.99 | 0.95 | A     | 123.47 | 5.45 | 0.00 | P     | 650.23  | CA14      | 5q21         |
| 236600_at    | 0.98 | 0.91 | PA    | 19.43  | 5.44 | 0.00 | P     | 104.07  | SPG20     | 13q13.2      |
| 205197_s_at  | 0.98 | 0.91 | PM    | 113.20 | 5.43 | 0.00 | P     | 607.93  | ATP7A     | α11.2-q13.3  |
| 215330_at    | 0.99 | 0.92 | A     | 14.63  | 5.43 | 0.02 | PM    | 80.73   |           |              |
| 242857_at    | 0.97 | 0.87 | P     | 153.33 | 5.39 | 0.00 | P     | 818.03  |           |              |
| 219815_at    | 0.99 | 0.93 | A     | 70.80  | 5.38 | 0.00 | P     | 376.70  | GAL3ST4   | 7q22         |
| 221962_s_at  | 0.97 | 0.88 | A     | 170.50 | 5.38 | 0.00 | P     | 918.23  | UBE2H     | 7q32         |
| 52837_at     | 0.98 | 0.91 | A     | 32.20  | 5.38 | 0.00 | P     | 169.50  | KIAA1644  | 22q13        |
| 235911_at    | 1.00 | 0.95 | PM    | 92.00  | 5.37 | 0.01 | P     | 490.00  |           |              |
| 205919_at    | 0.97 | 0.88 | PA    | 61.67  | 5.35 | 0.00 | P     | 326.50  | HBE1      | 11p15.5      |
| 232523_at    | 0.98 | 0.90 | P     | 94.23  | 5.34 | 0.00 | P     | 493.13  | MEGF10    | 9q33         |
| 230747_s_at  | 1.00 | 0.96 | P     | 30.10  | 5.34 | 0.00 | P     | 159.17  | FLJ33761  | 18q11.2      |
| 218799_at    | 1.00 | 0.95 | P     | 73.13  | 5.33 | 0.00 | P     | 382.33  | FLJ10349  | 1p35.3       |
| 203710_at    | 0.98 | 0.89 | A     | 15.67  | 5.33 | 0.00 | P     | 82.77   | ITPR1     | 3p26-p25     |
| 201801_s_at  | 0.99 | 0.94 | P     | 160.67 | 5.30 | 0.00 | P     | 843.00  | SLC29A1   | 3p21.1-p21.2 |
| 203000_s_at  | 0.99 | 0.94 | P     | 96.30  | 5.30 | 0.00 | P     | 504.37  | 8-Sep     | 5q21         |
| 235429_at    | 0.99 | 0.94 | P     | 47.63  | 5.30 | 0.00 | P     | 247.53  | E1F3S6    | 8q22-q23     |
| 1553192_at   | 0.99 | 0.92 | A     | 12.83  | 5.29 | 0.00 | PM    | 67.40   | ZNF441    | 19p13.2      |
| 242854_x_at  | 0.97 | 0.87 | PA    | 6.77   | 5.29 | 0.01 | P     | 35.73   | DLEU2     | 13q14.3      |
| 242554_at    | 0.99 | 0.94 | P     | 37.07  | 5.29 | 0.01 | P     | 176.93  |           |              |
| 241803_s_at  | 1.00 | 0.96 | P     | 34.57  | 5.28 | 0.00 | P     | 195.80  |           |              |
| 202664_at    | 0.97 | 0.87 | A     | 10.00  | 5.27 | 0.01 | P     | 53.03   | WASPIP    | 20q11.21     |
| 242976_at    | 0.99 | 0.92 | A     | 16.30  | 5.26 | 0.00 | P     | 84.30   |           |              |
| 211547_s_at  | 0.95 | 0.84 | P     | 74.40  | 5.26 | 0.00 | P     | 389.93  | PAFAH1B1  | 17p13.3      |
| 208213_s_at  | 1.00 | 0.95 | A     | 30.77  | 5.25 | 0.00 | P     | 158.97  | KCNAB1    | 3q26.1       |
| 204992_s_at  | 1.00 | 0.99 | P     | 405.60 | 5.25 | 0.00 | P     | 2097.70 | PNF2      | 3q25.1-q25.2 |
| 214787_at    | 0.99 | 0.92 | PA    | 18.37  | 5.24 | 0.00 | P     | 95.07   | JRBL      | 15q22.2      |
| 210647_x_at  | 1.00 | 0.96 | P     | 118.20 | 5.23 | 0.00 | P     | 612.00  | PLA2G6    | 22q13.1      |
| 241252_at    | 0.98 | 0.89 | M.A   | 15.53  | 5.23 | 0.00 | P     | 80.00   | LOC157570 | 8p21.1       |
| 217161_x_at  | 0.98 | 0.89 | A     | 34.97  | 5.22 | 0.00 | PA    | 178.37  | AGC1      | 15q26.1      |
| 212394_at    | 0.95 | 0.85 | A     | 26.23  | 5.22 | 0.00 | P     | 135.73  | KIAA0090  | 1p36.13      |
| 214692_s_at  | 0.89 | 0.76 | A     | 25.97  | 5.20 | 0.03 | P.M.A | 140.13  | JRK       | 8q24.3       |
| 201848_s_at  | 0.99 | 0.92 | PA    | 110.67 | 5.20 | 0.00 | P     | 569.70  | BNIP3     | 10q26.3      |
| 227628_at    | 0.99 | 0.95 | P     | 285.63 | 5.20 | 0.00 | P     | 1462.73 |           |              |
| 228011_at    | 0.98 | 0.91 | PA    | 65.20  | 5.20 | 0.01 | P     | 338.07  | LOC137392 | 8q22.1       |
| 221510_s_at  | 1.00 | 0.95 | P     | 394.63 | 5.18 | 0.00 | P     | 1965.77 | GLS       | 2q32-q34     |
| 233546_at    | 0.99 | 0.91 | A     | 15.87  | 5.18 | 0.00 | P     | 81.20   |           |              |
| 227771_at    | 1.00 | 0.99 | A     | 26.27  | 5.18 | 0.00 | P     | 134.50  | LIFR      | 5p13-p12     |
| 223339_at    | 0.99 | 0.95 | P     | 116.63 | 5.16 | 0.00 | P     | 593.03  | ATPIF1    | 1p35.3       |
| 242617_at    | 0.98 | 0.91 | P     | 137.40 | 5.16 | 0.00 | P     | 701.17  | LOC283578 | 14q24.3      |
| 225295_at    | 0.99 | 0.92 | PA    | 92.90  | 5.16 | 0.00 | P     | 475.93  | SLC39A10  | 2q33.1       |
| 235194_at    | 1.00 | 0.96 | A     | 98.77  | 5.15 | 0.00 | P     | 501.67  |           |              |
| 219082_at    | 0.99 | 0.92 | M.A   | 50.30  | 5.15 | 0.00 | P     | 256.00  | CGI-14    | 16p13.3      |
| 218598_at    | 1.00 | 0.96 | P     | 207.17 | 5.14 | 0.00 | P     | 1051.17 | RINT-1    | 7q22.2       |
| 228471_at    | 0.99 | 0.94 | A     | 25.97  | 5.14 | 0.01 | P     | 132.93  | LOC1526   | 2q31.1       |
| 202341_s_at  | 0.98 | 0.89 | A     | 54.90  | 5.12 | 0.00 | P     | 270.63  | TRIM2     | 4q31.3       |
| 236831_at    | 0.96 | 0.86 | P     | 110.57 | 5.12 | 0.00 | P     | 560.97  | C3orf6    | 3q28         |
| 229251_s_at  | 0.99 | 0.93 | P     | 102.03 | 5.12 | 0.00 | P     | 513.63  | TPCN2     | 1q13.1-q13.2 |
| 210007_s_at  | 0.97 | 0.89 | P     | 73.83  | 5.12 | 0.00 | P     | 376.13  | GPD2      | 2q24.1       |
| 203632_s_at  | 1.00 | 0.96 | P.M.A | 194.70 | 5.11 | 0.00 | P     | 978.43  | GPRCSB    | 16p12        |
| 238652_at    | 0.97 | 0.87 | A     | 24.73  | 5.11 | 0.00 | P     | 124.93  |           | 8q2.3        |
| 200827_at    | 0.95 | 0.85 | P     | 170.13 | 5.10 | 0.00 | P     |         |           |              |

|              |      |      |      |        |      |      |      |         |           |               |
|--------------|------|------|------|--------|------|------|------|---------|-----------|---------------|
| 224848_at    | 0.99 | 0.95 | P    | 131.90 | 4.99 | 0.00 | P    | 648.77  | CDK6      | 7q21-q22      |
| 230730_at    | 0.95 | 0.85 | A    | 26.10  | 4.99 | 0.00 | P    | 127.53  | SGCD      | 5q33-q34      |
| 205198_s_at  | 0.96 | 0.86 | P    | 89.57  | 4.98 | 0.00 | P    | 436.77  | ATP7A     | q11.2-q13.3   |
| 238728_at    | 0.95 | 0.84 | A    | 17.03  | 4.98 | 0.01 | P    | 84.40   | FLJ39485  | 5q15          |
| 1554274_a_at | 0.97 | 0.88 | A    | 16.37  | 4.98 | 0.00 | P    | 80.73   | SSH1      | 12q24.12      |
| 208002_s_at  | 1.00 | 0.96 | P    | 438.67 | 4.97 | 0.00 | P    | 2151.23 | BACH      | p36.31-p36.11 |
| 206352_s_at  | 0.99 | 0.92 | A    | 43.40  | 4.96 | 0.00 | P    | 210.97  | PEX10     | 1p36.32       |
| 240721_at    | 0.96 | 0.87 | PA   | 17.40  | 4.96 | 0.00 | P    | 85.70   | DBC-3     | 8p22          |
| 231847_at    | 1.00 | 0.96 | P    | 330.00 | 4.95 | 0.00 | P    | 1569.57 | LOC129138 | 22q13.1       |
| 49679_s_at   | 0.99 | 0.95 | P    | 110.47 | 4.95 | 0.00 | P    | 538.63  | MMP24     | 20q11.2       |
| 216272_x_at  | 1.00 | 0.97 | P,MA | 72.47  | 4.94 | 0.00 | P    | 353.00  | 7h3       | 19p13.13      |
| 224963_at    | 0.99 | 0.93 | P    | 194.77 | 4.94 | 0.00 | P    | 952.03  | SLC26A2   | 5q31-q34      |
| 242794_at    | 0.98 | 0.89 | P    | 15.60  | 4.94 | 0.00 | P    | 76.37   | MAML3     | 4q28          |
| 211651_s_at  | 0.96 | 0.87 | P    | 124.07 | 4.94 | 0.00 | P    | 507.20  | LAMB1     | 7q22          |
| 230697_at    | 0.99 | 0.93 | A    | 24.27  | 4.94 | 0.00 | P    | 117.77  | BSS5      | 2q31.1        |
| 215811_at    | 0.99 | 0.94 | A    | 48.93  | 4.93 | 0.00 | P    | 236.80  |           |               |
| 203759_at    | 1.00 | 0.96 | P    | 110.00 | 4.93 | 0.00 | P    | 534.57  | SIAT4C    | 11q23-q24     |
| 221561_at    | 0.99 | 0.92 | P    | 159.43 | 4.93 | 0.00 | P    | 775.97  | SOAT1     | 1q25          |
| 222420_s_at  | 0.99 | 0.92 | P    | 331.53 | 4.93 | 0.00 | P    | 1602.20 | UBE2H     | 7q32          |
| 226433_at    | 0.97 | 0.89 | A    | 17.30  | 4.92 | 0.00 | P    | 83.50   | RNF157    | 17q25.3       |
| 216299_s_at  | 0.98 | 0.90 | A    | 31.23  | 4.92 | 0.00 | P    | 151.67  | XRCC3     | 14q32.3       |
| 236517_at    | 0.99 | 0.92 | P    | 37.53  | 4.91 | 0.00 | P    | 182.30  | MEGF10    | 5q33          |
| 242931_at    | 0.99 | 0.95 | P    | 102.73 | 4.90 | 0.00 | P    | 496.50  |           |               |
| 238624_at    | 0.98 | 0.91 | PA   | 60.53  | 4.89 | 0.00 | P    | 283.77  |           |               |
| 228205_at    | 1.00 | 0.96 | P    | 161.10 | 4.89 | 0.00 | P    | 774.03  | TKT       | 3p14.3        |
| 207091_at    | 0.99 | 0.95 | A    | 17.47  | 4.88 | 0.00 | P    | 84.30   | P2RX7     | 12q24         |
| 237365_at    | 1.00 | 0.96 | A    | 21.83  | 4.87 | 0.00 | P    | 104.70  |           |               |
| 236745_at    | 0.98 | 0.91 | A    | 16.77  | 4.86 | 0.00 | P    | 80.77   | FLJ34512  | 16p13.3       |
| 225833_at    | 0.99 | 0.96 | MA   | 19.62  | 4.85 | 0.00 | P    | 412.23  | ZNF275    | xq28          |
| 205453_at    | 0.99 | 0.91 | A    | 35.83  | 4.85 | 0.00 | P    | 170.50  | HOBX2     | 17q21-q22     |
| 218404_at    | 0.99 | 0.94 | P    | 346.57 | 4.85 | 0.00 | P    | 1658.87 | SNX10     | 7p15.2        |
| 227126_at    | 0.99 | 0.93 | P    | 72.30  | 4.85 | 0.00 | P    | 346.10  |           |               |
| 242338_at    | 0.98 | 0.91 | A    | 24.27  | 4.85 | 0.01 | P    | 118.50  | ФЗp762C1  | 8q21.3        |
| 238660_at    | 0.95 | 0.84 | A    | 17.20  | 4.85 | 0.00 | P    | 82.70   |           |               |
| 222470_s_at  | 0.97 | 0.87 | A    | 30.20  | 4.85 | 0.00 | P    | 144.90  | C20orf44  | 20q11.23      |
| 1563182_at   | 0.98 | 0.90 | P    | 21.30  | 4.84 | 0.01 | P    | 102.80  |           |               |
| 1562472_a_at | 0.99 | 0.92 | P    | 78.43  | 4.84 | 0.00 | P    | 373.83  | CENTB2    | 3q29          |
| 226056_at    | 1.00 | 0.97 | P    | 88.27  | 4.82 | 0.00 | P    | 419.37  | CDGAP     | 3q13.33       |
| 202609_at    | 0.99 | 0.93 | PA   | 219.70 | 4.81 | 0.00 | P    | 1151.67 | EPHS      | 12q22-q24     |
| 233903_s_at  | 0.99 | 0.94 | P    | 35.10  | 4.81 | 0.00 | P    | 167.20  | SGEF      | 3q25.2        |
| 203706_s_at  | 0.99 | 0.94 | P    | 108.47 | 4.80 | 0.00 | P    | 514.10  | FZD7      | 2q33          |
| 228415_at    | 1.00 | 0.96 | P    | 361.00 | 4.80 | 0.00 | P    | 1706.33 | AP1S2     | Xp22.31       |
| 209598_s_at  | 1.00 | 0.97 | P    | 114.57 | 4.80 | 0.00 | P    | 5272.57 | SDCBP     | 8q12          |
| 208891_at    | 1.00 | 0.97 | P    | 259.27 | 4.80 | 0.00 | P    | 1221.57 | DUSP6     | 12q22-q23     |
| 215720_s_at  | 0.99 | 0.94 | A    | 16.00  | 4.80 | 0.01 | P,MA | 76.63   | NFYA      | 6p21.3        |
| 228539_at    | 0.96 | 0.87 | A    | 16.33  | 4.79 | 0.01 | P    | 78.97   |           |               |
| 229250_at    | 0.98 | 0.91 | P    | 233.30 | 4.79 | 0.00 | P    | 1093.60 | TPCN2     | 1q13.1-q13.2  |
| 205376_at    | 0.99 | 0.93 | P    | 168.27 | 4.79 | 0.00 | P    | 789.87  | INPP4B    | 4q31.1        |
| 209611_s_at  | 1.00 | 0.98 | A    | 87.97  | 4.78 | 0.00 | P    | 418.78  | SLC11A4   | 2p15-p13      |
| 233539_at    | 0.99 | 0.95 | PA   | 37.37  | 4.78 | 0.00 | P    | 177.00  | NAPE-PLD  | 7q22.1        |
| 1554084_a_at | 1.00 | 0.99 | A    | 111.80 | 4.78 | 0.00 | P    | 526.47  | FLJ23323  | 1p36.23       |
| 223095_at    | 0.99 | 0.95 | PM   | 148.23 | 4.77 | 0.00 | P    | 701.17  | MRVLDC1   | 10q24.2       |
| 225630_at    | 0.96 | 0.86 | A    | 12.17  | 4.77 | 0.01 | PA   | 58.17   | KIAA1706  | 7p14          |
| 212745_s_at  | 0.99 | 0.93 | PA   | 129.70 | 4.77 | 0.00 | P    | 607.57  | KAB       | 1q24          |
| 244190_at    | 0.99 | 0.94 | PA   | 15.97  | 4.75 | 0.00 | P    | 74.73   | THAP5     | 7q22.3        |
| 1552927_at   | 0.99 | 0.92 | P    | 12.83  | 4.75 | 0.00 | P    | 59.80   | TAB3      | xp21.3        |
| 217540_at    | 0.96 | 0.86 | P    | 22.67  | 4.75 | 0.00 | P    | 106.73  |           |               |
| 212005_at    | 1.00 | 0.95 | A    | 78.03  | 4.74 | 0.00 | P    | 369.93  | ФЗp566C04 | 1p36.13       |
| 233064_at    | 0.98 | 0.91 | A    | 35.33  | 4.74 | 0.00 | P    | 164.30  | CHPT1     | 12q           |
| 239901_at    | 0.98 | 0.91 | A    | 48.07  | 4.74 | 0.00 | P    | 225.27  |           |               |
| 235339_at    | 0.98 | 0.90 | A    | 48.80  | 4.74 | 0.00 | P    | 229.20  | SETDB2    | 13q14         |
| 230220_at    | 0.93 | 0.82 | A    | 13.67  | 4.74 | 0.01 | P    | 64.13   |           |               |
| 224388_s_at  | 0.95 | 0.84 | A    | 89.70  | 4.73 | 0.00 | P    | 422.87  | GNB4      | 3q27.1        |
| 230722_at    | 0.99 | 0.94 | MA   | 63.90  | 4.73 | 0.00 | P    | 246.90  | BNC2      | 2p22.2        |
| 1552485_at   | 0.98 | 0.91 | PM   | 89.00  | 4.72 | 0.00 | P    | 416.67  | LACTB     | 15q22.1       |
| 219471_at    | 0.99 | 0.92 | A    | 37.93  | 4.72 | 0.00 | P    | 176.97  | C13orf18  | 13q14.11      |
| 227626_at    | 0.98 | 0.91 | P    | 43.77  | 4.72 | 0.00 | P    | 203.27  | C6orf33   | 6p12.1        |
| 216788_s_at  | 0.98 | 0.90 | A    | 50.70  | 4.72 | 0.00 | PM   | 236.90  | SMYD3     | 1q44          |
| 225860_at    | 1.00 | 0.97 | P,MA | 129.27 | 4.72 | 0.00 | P    | 923.15  | MMP24     | 20q11.2       |
| 226250_at    | 0.95 | 0.84 | A    | 14.67  | 4.72 | 0.01 | PA   | 68.77   |           |               |
| 200757_s_at  | 1.00 | 0.97 | P    | 790.00 | 4.71 | 0.00 | P    | 3658.30 | CALU      | 7q32          |
| 209283_at    | 1.00 | 0.98 | PA   | 315.03 | 4.71 | 0.00 | P    | 1466.40 | CRYAB     | 1q22.3-q23.1  |
| 238624_at    | 0.98 | 0.90 | P    | 19.93  | 4.70 | 0.00 | P    | 91.87   | NLK       | 17q11.2       |
| 203158_s_at  | 0.99 | 0.92 | A    | 36.07  | 4.70 | 0.00 | P    | 167.13  | GLS       | 2q32-q34      |
| 1555014_x_at | 0.98 | 0.90 | PA   | 13.27  | 4.70 | 0.00 | P    | 61.13   |           |               |
| 211479_s_at  | 0.97 | 0.89 | PA   | 9.90   | 4.70 | 0.01 | P    | 46.73   | HTR2C     | xq24          |
| 225796_at    | 1.00 | 0.98 | P    | 58.43  | 4.69 | 0.00 | P    | 270.00  | PXK       | 3p21.2        |
| 1556186_s_at | 1.00 | 0.97 | P    | 65.87  | 4.69 | 0.00 | P    | 306.17  | KIAA0090  | 1p36.13       |
| 202545_at    | 0.96 | 0.86 | P    | 110.53 | 4.69 | 0.00 | P    | 517.20  | PRKCG     | 3p21.31       |
| 206752_s_at  | 0.98 | 0.91 | PA   | 28.60  | 4.69 | 0.01 | P    | 134.30  | DFB       | 1p36.3        |
| 202459_s_at  | 0.99 | 0.92 | P    | 51.57  | 4.68 | 0.00 | P    | 238.73  | LPIN2     | 18p11.31      |
| 217247_at    | 0.97 | 0.87 | A    | 13.40  | 4.68 | 0.02 | P,MA | 64.43   | RBM3      | xp11.2        |
| 202430_s_at  | 0.98 | 0.91 | P    | 325.27 | 4.67 | 0.00 | P    | 1502.00 | FLSCR1    | 3q23          |
| 1559403_at   | 0.97 | 0.88 | PA   | 19.83  | 4.67 | 0.00 | P    | 91.00   |           |               |
| 227080_at    | 1.00 | 0.96 | P    | 117.07 | 4.66 | 0.00 | P    | 534.97  | MGC45731  | 1p11.2        |
| 234987_at    | 1.00 | 0.98 | P    | 88.43  | 4.65 | 0.00 | P    | 405.70  |           | 20q11.23      |
| 232195_at    | 0.99 | 0.94 | A    | 64.37  | 4.65 | 0.00 | P    | 296.20  | GPR158    | 10p12.31      |
| 238229_at    | 0.94 | 0.83 | A    | 11.90  | 4.65 | 0.00 | P    | 55.30   | MGC26979  | 8q22.1        |
| 207968_s_at  | 0.98 | 0.89 | A    | 21.67  | 4.65 | 0.00 | PM   | 100.00  | MEF2C     | 5q14          |
| 235391_at    | 1.00 | 0.96 | P    | 123.07 | 4.65 | 0.00 | P    | 563.27  | LOC137392 | 8q22.1        |
| 223158_s_at  | 0.99 | 0.93 | P    | 113.30 | 4.64 | 0.00 | P    | 520.17  | NEK6      | 1q33.3-q34.11 |
| 227462_at    | 0.99 | 0.92 | P    | 72.97  | 4.63 | 0.00 | P    | 334.00  | LRAP      | 16            |
| 224759_s_at  | 1.00 | 0.99 | P    | 192.77 | 4.62 | 0.00 | P    | 877.77  | MGC17943  | 12q24.11      |
| 201636_s_at  | 1.00 | 0.96 | P    | 178.20 | 4.62 | 0.00 | P    | 811.03  | FXR1      | 3q28          |
| 202364_at    | 1.00 | 0.98 | P    | 405.33 | 4.62 | 0.00 | P    | 1842.87 | MX1       | 10q24-q25     |
| 227746_at    | 0.96 | 0.87 | PA   | 33.77  | 4.62 | 0.00 | P    | 154.87  | ELAVL1    | 19p13.2       |
| 232099_at    | 0.99 | 0.93 | P    | 77.53  | 4.62 | 0.00 | P    | 355.47  | PCDH16    | 5q31          |
| 226575_at    | 0.96 | 0.87 | MA   | 59.50  | 4.62 | 0.01 | P    | 270.87  | ZNF462    | 9q32          |
| 221675_s_at  | 0.99 | 0.92 | P    | 340.40 | 4.61 | 0.00 | P    | 1551.33 | CORO1C    | 12q24.1       |
| 232701_at    | 0.96 | 0.87 | A    | 31.57  | 4.60 | 0.00 | P    | 142.23  |           |               |
| 231579_s_at  | 1.00 | 0.97 | P    | 507.47 | 4.60 | 0.00 | P    | 2300.07 | TIMP2     | 17q25         |
| 201849_at    | 1.00 | 0.97 | P    | 250.97 | 4.60 | 0.00 | P    | 1136.73 | BNIP3     | 10q26.3       |
| 1552946_at   | 0.97 | 0.88 | A    | 22.20  | 4.59 | 0.01 | P    | 101.73  | MGC17986  | 19q13.33      |
| 213022_s_at  | 1.00 | 0.96 | PA   | 44.10  | 4.59 | 0.00 | P    | 200.73  | UTRN      | 6q24          |
| 222699_s_at  | 0.99 | 0.93 | P    | 149.03 | 4.58 | 0.00 | P    | 678.07  | PLEKHF2   | 8q22.1        |
| 1569323_at   | 0.93 | 0.83 | A    | 15.13  | 4.58 | 0.01 | P    | 69.57   | PTPRG     | 3p21-p14      |
| 226738_at    | 0.98 | 0.90 | A    | 63.50  | 4.58 | 0.00 | P    | 288.00  | FLJ33817  | 17p13.3       |
| 1557915_s_at | 1.00 | 0.96 | P    | 811.77 | 4.57 | 0.00 | P    | 3659.83 | GSTO1     | 10q25.1       |
| 225767_s_at  | 1.00 | 0.99 | P    | 81.10  | 4.57 | 0.00 | P    | 365.50  | ФЗP566J2C | 16p13.3       |
| 210963_s_at  | 1.00 | 0.96 | PA   | 158.83 | 4.57 | 0.00 | P    | 716.70  | GYG2      | xp22.3        |
| 1555781_at   | 1.00 | 0.97 | A    | 57.93  | 4.56 | 0.00 | P    | 260.03  | PQLC2     | 1p36.13       |
| 54037_at     | 1.00 | 0.98 | P    | 82.63  | 4.56 | 0.01 | P    | 374.83  | HPS4      | 22cen-q12.3   |
| 213361_at    | 1.00 | 0.99 | P    | 179.40 | 4.56 | 0.00 | P    | 804.57  | TDRO7     | 9q22.33       |
| 1558693_s_at | 0.99 | 0.97 | P    | 894.93 | 4.55 | 0.00 | P    | 624.30  | MGC31963  | 3q21.1        |
| 226274_at    | 0.99 | 0.94 | PA   | 132.87 | 4.54 | 0.00 | P    | 594.43  | LOC158563 | xp11.23       |
| 237305_at    | 0.98 | 0.91 | A    | 10.70  | 4.54 | 0.00 | P    | 47.90   |           |               |
| 235443_at    | 1.00 | 0.97 | P    | 34.20  | 4.53 | 0.00 | P    | 153.03  |           |               |
| 204735_at    | 1.00 | 0.98 | P    | 51.37  | 4.53 | 0.00 | P    | 228.50  | PDE4A     | 19p13.2       |
| 205066_s_at  | 0.96 | 0.86 | A    | 23.57  | 4.52 | 0.00 | P    | 105.77  | ENPP1     | 6q22-q23      |
| 1552705_at   | 0.95 | 0.85 | P    | 12.00  | 4.52 | 0.01 |      |         |           |               |



|              |      |      |     |        |      |      |      |         |           |               |
|--------------|------|------|-----|--------|------|------|------|---------|-----------|---------------|
| 203641_s_at  | 0.98 | 0.90 | A   | 48.40  | 4.46 | 0.00 | P    | 212.80  | COBLL1    | 2q24.3        |
| 225401_at    | 1.00 | 0.99 | P   | 215.37 | 4.46 | 0.00 | P    | 944.70  | MGC31963  | 1q23.1        |
| 201998_at    | 1.00 | 0.97 | P   | 360.60 | 4.45 | 0.00 | P    | 1578.60 | SIAT1     | 3q27-q28      |
| 232850_at    | 1.00 | 0.95 | A   | 20.70  | 4.45 | 0.01 | P,MA | 92.70   |           |               |
| 209088_s_at  | 0.98 | 0.90 | P   | 92.50  | 4.44 | 0.00 | P    | 402.80  | UBN1      | 16p13.3       |
| 231576_at    | 0.95 | 0.85 | PA  | 40.87  | 4.44 | 0.00 | P    | 181.57  |           |               |
| 239511_s_at  | 0.97 | 0.88 | PA  | 14.20  | 4.44 | 0.00 | P    | 62.60   |           |               |
| 202976_s_at  | 1.00 | 0.95 | P   | 209.17 | 4.44 | 0.00 | P    | 914.97  | RHOBTB3   | 5q15          |
| 218697_at    | 0.97 | 0.88 | P   | 45.00  | 4.43 | 0.00 | P    | 185.13  | AT77BP    | 12p13.2       |
| 209361_s_at  | 1.00 | 0.96 | P,M | 167.73 | 4.43 | 0.00 | P    | 731.67  | PCBP4     | 3p21          |
| 238905_at    | 0.97 | 0.89 | A   | 37.27  | 4.43 | 0.00 | PA   | 161.93  | RHOJ      | 14q23.2       |
| 213236_at    | 0.99 | 0.92 | A   | 140.27 | 4.43 | 0.00 | P    | 607.77  | SASH1     | 6q24.3        |
| 224461_s_at  | 0.96 | 0.86 | P,M | 129.17 | 4.42 | 0.00 | P    | 559.57  | AMID      | 10q22.2       |
| 217437_s_at  | 0.99 | 0.95 | A   | 119.53 | 4.42 | 0.00 | P    | 400.23  | TACC1     | 9p11          |
| 224959_at    | 1.00 | 0.96 | P   | 559.80 | 4.41 | 0.00 | P    | 2435.93 | SLC26A2   | 5q31-q34      |
| 205771_s_at  | 0.99 | 0.94 | A   | 30.47  | 4.41 | 0.00 | P    | 132.20  | AKAP7     | 6q23          |
| 213112_s_at  | 0.97 | 0.88 | A   | 18.80  | 4.41 | 0.00 | P    | 81.67   | SQSTM1    | 5q35          |
| 225652_at    | 1.00 | 0.99 | PA  | 278.03 | 4.41 | 0.00 | P    | 1206.27 |           |               |
| 204995_at    | 0.99 | 0.94 | P   | 49.77  | 4.40 | 0.00 | P    | 216.47  |           |               |
| 239870_at    | 0.98 | 0.91 | A   | 29.40  | 4.40 | 0.00 | P    | 126.90  | CDK5R1    | 17q12         |
| 222385_x_at  | 0.95 | 0.84 | PA  | 363.87 | 4.40 | 0.00 | P    | 1608.40 | SPAT51    | 6p21.1        |
| 242888_at    | 1.00 | 0.95 | P   | 101.93 | 4.40 | 0.00 | P    | 440.20  | SEC81A1   | 3q21.3        |
| 243502_at    | 0.94 | 0.83 | A   | 17.87  | 4.40 | 0.02 | PA   | 80.33   |           |               |
| 244356_at    | 0.94 | 0.82 | PA  | 8.70   | 4.39 | 0.02 | P    | 39.57   |           |               |
| 230201_at    | 0.99 | 0.94 | PA  | 21.53  | 4.39 | 0.01 | P    | 93.97   | FXR1      | 3q28          |
| 202139_at    | 0.99 | 0.94 | P   | 186.87 | 4.39 | 0.00 | P    | 809.30  | AKR7A2    | p35.1-p36.23  |
| 224599_at    | 1.00 | 0.98 | P   | 500.37 | 4.39 | 0.00 | P    | 2155.33 | CGGBP1    | 3p12-p11.1    |
| 203819_s_at  | 0.97 | 0.89 | P   | 159.40 | 4.38 | 0.00 | P    | 694.60  | IMP3      | 7p11          |
| 231855_at    | 0.99 | 0.92 | P   | 162.97 | 4.38 | 0.00 | P    | 515.66  | KIAA1524  | 3q13.13       |
| 239697_x_at  | 0.99 | 0.92 | P,M | 21.90  | 4.38 | 0.01 | P    | 95.43   | FLJ42117  | 3p21.2        |
| 226400_at    | 0.98 | 0.89 | P   | 287.83 | 4.37 | 0.00 | P    | 1246.10 | CDC42     | 1p36.1        |
| 244007_at    | 1.00 | 0.96 | P   | 40.13  | 4.37 | 0.01 | P    | 175.53  |           |               |
| 209967_s_at  | 0.99 | 0.95 | PA  | 71.47  | 4.37 | 0.00 | P    | 308.87  | CREM      | 10p11.21      |
| 224847_at    | 1.00 | 0.95 | P   | 20.20  | 4.37 | 0.00 | P    | 87.13   | CDK6      | 7q21-q22      |
| 225161_at    | 0.99 | 0.93 | P   | 252.33 | 4.35 | 0.00 | P    | 1082.73 | EFG1      | 3q25.1-q26.2  |
| 213639_s_at  | 0.99 | 0.93 | A   | 23.17  | 4.34 | 0.00 | PA   | 98.70   | ZNF500    | 16p13.3       |
| 221773_at    | 0.99 | 0.95 | P   | 137.73 | 4.33 | 0.00 | P    | 588.87  | ELK3      | 12q23         |
| 223163_s_at  | 1.00 | 0.97 | P   | 372.83 | 4.33 | 0.00 | P    | 1586.40 | NIPA      | 7q32.3        |
| 223107_s_at  | 0.98 | 0.89 | P   | 158.77 | 4.33 | 0.00 | P    | 671.73  | PS1D      | 1p35.1        |
| 1569788_at   | 1.00 | 0.95 | P   | 16.50  | 4.32 | 0.01 | P    | 70.93   |           |               |
| 226487_at    | 1.00 | 0.99 | PA  | 47.07  | 4.31 | 0.00 | P    | 199.63  | FLJ14721  | 12q24.12      |
| 226229_s_at  | 0.99 | 0.93 | A   | 42.50  | 4.31 | 0.01 | P    | 180.77  | HSPC182   | 1p36.33       |
| 209698_at    | 0.99 | 0.95 | P   | 57.70  | 4.30 | 0.00 | P    | 244.40  | TRIP15    | 15q21.2       |
| 222917_s_at  | 0.98 | 0.91 | P   | 118.90 | 4.29 | 0.00 | P    | 521.97  | DuskyPK   | 1q21          |
| 243492_at    | 0.98 | 0.90 | PA  | 65.83  | 4.30 | 0.00 | P    | 278.83  | CTMP      | 1q21          |
| 241164_at    | 0.98 | 0.91 | PA  | 21.07  | 4.30 | 0.00 | P    | 89.70   |           |               |
| 1553679_s_at | 0.97 | 0.88 | PA  | 26.30  | 4.29 | 0.00 | P    | 112.17  | VKORC1L1  | 7q11.21       |
| 203047_at    | 1.00 | 0.98 | A   | 120.67 | 4.29 | 0.00 | P    | 508.03  | STK10     | 5q35.1        |
| 204691_x_at  | 1.00 | 0.96 | P   | 118.90 | 4.29 | 0.00 | P    | 504.63  | PLAZG6    | 22q13.1       |
| 203723_at    | 0.99 | 0.93 | A   | 67.93  | 4.28 | 0.00 | P    | 285.57  | ITPKB     | 14q42.13      |
| 223772_s_at  | 0.99 | 0.95 | P   | 39.70  | 4.28 | 0.01 | P    | 168.20  | FZP564G2I | 15q14         |
| 202536_at    | 1.00 | 0.99 | P   | 272.70 | 4.27 | 0.00 | P    | 1148.10 | FZP564O1  | 3p12.1        |
| 1554168_a_at | 0.99 | 0.93 | PA  | 248.50 | 4.26 | 0.00 | P    | 1046.67 | SH3KBP1   | o22.1-o21.3   |
| 242665_at    | 1.00 | 0.97 | P   | 194.27 | 4.26 | 0.01 | P    | 787.13  | FMNL2     | 2q24.1        |
| 1558458_at   | 1.00 | 0.96 | A   | 9.23   | 4.25 | 0.00 | PA   | 38.63   |           |               |
| 213490_s_at  | 1.00 | 0.97 | PA  | 147.70 | 4.24 | 0.00 | P    | 618.90  | MAP2K2    | 19p13.3       |
| 218789_s_at  | 0.99 | 0.93 | M,A | 41.37  | 4.23 | 0.00 | P    | 173.17  | FLJ20010  | 1q14.2-q14.3  |
| 215533_s_at  | 1.00 | 0.98 | PA  | 53.57  | 4.22 | 0.00 | P    | 222.83  | UBE4B     | 1p36.3        |
| 200661_at    | 0.99 | 0.93 | P   | 179.93 | 4.22 | 0.00 | P    | 1986.73 | PRKG      | 22q13.1       |
| 229236_s_at  | 0.99 | 0.93 | P   | 161.87 | 4.22 | 0.00 | P    | 672.97  | SFXN4     | 10q26.13      |
| 1552274_at   | 1.00 | 0.97 | A   | 60.87  | 4.21 | 0.00 | P    | 252.50  | PKK       | 3p21.2        |
| 1554251_at   | 1.00 | 0.97 | A   | 70.70  | 4.21 | 0.00 | P    | 293.23  | HP1-BP74  | 1p36.12       |
| 218196_at    | 1.00 | 1.00 | P   | 406.20 | 4.21 | 0.00 | P    | 1680.50 | OSTM1     | 8q21          |
| 227351_at    | 0.97 | 0.87 | P   | 34.80  | 4.21 | 0.00 | P    | 142.30  | LOC148174 | 11q12.3       |
| 232263_at    | 1.00 | 0.96 | A   | 15.20  | 4.20 | 0.00 | P    | 63.33   | SLC6A15   | 12q21.3       |
| 217960_s_at  | 0.97 | 0.89 | P   | 336.80 | 4.20 | 0.00 | P    | 1398.93 | TOMM22    | 22q12-q13     |
| 212959_s_at  | 1.00 | 0.97 | P   | 399.37 | 4.20 | 0.00 | P    | 1647.57 | MGC4170   | 12q23.3       |
| 213256_at    | 1.00 | 0.97 | A   | 31.80  | 4.20 | 0.00 | P    | 131.53  | MGC48332  | 5q23.3        |
| 242017_at    | 0.99 | 0.93 | A   | 20.97  | 4.20 | 0.00 | P    | 86.33   |           |               |
| 203441_s_at  | 0.99 | 0.93 | A   | 40.50  | 4.19 | 0.00 | P    | 167.70  | CDH2      | 18q11.2       |
| 214070_s_at  | 0.99 | 0.92 | A   | 65.73  | 4.19 | 0.00 | P    | 273.83  | ATP10B    | 5q34          |
| 222412_s_at  | 0.99 | 0.94 | P   | 347.97 | 4.19 | 0.00 | P    | 1439.67 | SSR3      | 3q25.31       |
| 1552519_at   | 0.97 | 0.88 | P   | 36.10  | 4.19 | 0.00 | P    | 148.67  | ACVR1C    | 2q24.2        |
| 212090_at    | 0.98 | 0.91 | P   | 279.20 | 4.19 | 0.00 | P    | 1151.20 | GRINA     | 8q24.3        |
| 205219_s_at  | 0.98 | 0.89 | P   | 77.80  | 4.19 | 0.00 | P    | 322.17  | GALK2     | 15q15.3       |
| 207088_s_at  | 0.98 | 0.91 | P   | 278.83 | 4.19 | 0.00 | P    | 1156.43 | SLC25A11  | 17p13.3       |
| 1555705_a_at | 1.00 | 0.98 | A   | 69.77  | 4.18 | 0.00 | P    | 287.43  | CKLF3F3   | 16q22.1       |
| 1552789_at   | 0.98 | 0.90 | PA  | 10.60  | 4.18 | 0.03 | P    | 46.63   | FLJ32803  | 3q26.31       |
| 219677_at    | 0.98 | 0.91 | A   | 52.67  | 4.18 | 0.00 | P    | 217.80  | SSB1      | 15q26.2       |
| 210757_x_at  | 0.98 | 0.91 | A   | 122.33 | 4.18 | 0.00 | P    | 505.93  | DAB2      | 5p13          |
| 219703_at    | 0.99 | 0.94 | P   | 85.87  | 4.18 | 0.00 | P    | 355.63  | MNS1      | 15q21.2       |
| 1569025_s_at | 0.95 | 0.85 | A   | 13.07  | 4.18 | 0.02 | P    | 56.33   |           | 4q22.1        |
| 225157_at    | 1.00 | 0.97 | P   | 166.73 | 4.18 | 0.00 | P    | 684.80  |           |               |
| 1570255_s_at | 1.00 | 0.96 | PA  | 13.17  | 4.17 | 0.02 | P    | 58.43   | ANKRD20A  | 9p11.2        |
| 220078_at    | 1.00 | 0.96 | P   | 33.40  | 4.17 | 0.01 | P    | 138.23  | USP4B     | 1p36.12       |
| 229061_s_at  | 0.98 | 0.91 | P   | 225.53 | 4.17 | 0.00 | P    | 928.67  | SLC25A13  | 7q21.3        |
| 217097_s_at  | 1.00 | 0.96 | P   | 41.63  | 4.16 | 0.01 | P    | 173.67  | PHTF2     | 7q11.23-q21   |
| 223814_at    | 0.98 | 0.90 | PA  | 33.60  | 4.16 | 0.00 | P    | 138.83  | TRNT1     | 3p25.1        |
| 227860_s_at  | 0.99 | 0.96 | P   | 21.03  | 4.16 | 0.00 | P    | 1315.23 | FZP566J2C | 1q21.3        |
| 219654_at    | 0.99 | 0.94 | P   | 224.97 | 4.16 | 0.00 | P    | 922.67  | PTPLA     | 10p14-p13     |
| 1555039_a_at | 0.99 | 0.94 | P   | 46.90  | 4.16 | 0.00 | P    | 193.67  | ABCC4     | 13q32         |
| 232614_at    | 0.97 | 0.88 | A   | 9.40   | 4.16 | 0.01 | PA   | 38.60   |           |               |
| 244873_s_at  | 0.98 | 0.89 | A   | 14.33  | 4.15 | 0.01 | P    | 59.63   | FLJ13052  | 336.33-q36.21 |
| 209818_s_at  | 1.00 | 0.97 | P   | 191.10 | 4.15 | 0.00 | P    | 781.50  | TNC       | 9q33          |
| 216005_at    | 1.00 | 0.97 | P   | 19.93  | 4.15 | 0.00 | P    | 81.53   |           |               |
| 1557293_at   | 0.97 | 0.88 | P   | 29.03  | 4.15 | 0.01 | P    | 120.07  |           |               |
| 216466_at    | 1.00 | 0.97 | A   | 4.47   | 4.14 | 0.00 | P    | 18.33   | NAV3      |               |
| 220952_s_at  | 1.00 | 0.98 | P   | 208.60 | 4.14 | 0.00 | P    | 848.77  | PEPP2     | 12p12         |
| 235775_at    | 1.00 | 0.96 | P   | 119.53 | 4.14 | 0.00 | P    | 491.57  | KFZ0782A2 | 12q21.31      |
| 202825_at    | 1.00 | 0.97 | P   | 230.63 | 4.13 | 0.00 | P    | 938.57  | SLC25A4   | 4q35          |
| 244251_at    | 0.99 | 0.93 | A   | 14.70  | 4.13 | 0.00 | P,M  | 60.13   | LCP2      | 5q33.1-qter   |
| 219428_s_at  | 1.00 | 1.00 | P   | 154.70 | 4.13 | 0.00 | P    | 628.27  | PXMP4     | 20q11.22      |
| 1557060_at   | 0.99 | 0.93 | A   | 25.00  | 4.13 | 0.00 | P    | 101.90  | LOC148756 | 1q25.1        |
| 201635_s_at  | 0.99 | 0.96 | P   | 324.70 | 4.13 | 0.00 | P    | 1329.20 | FXR1      | 3q28          |
| 1554311_a_at | 0.98 | 0.90 | PA  | 13.90  | 4.13 | 0.01 | P    | 58.50   | SUPT6H    | 17q11.2       |
| 229100_s_at  | 0.99 | 0.94 | A   | 31.33  | 4.12 | 0.01 | P    | 127.97  | TIMM22    | 17p13         |
| 1555216_a_at | 0.95 | 0.84 | A   | 34.03  | 4.12 | 0.00 | P    | 136.97  |           |               |
| 1554785_at   | 0.97 | 0.88 | PA  | 18.97  | 4.12 | 0.00 | P    | 77.40   | FLJ23518  | 11q21         |
| 226155_at    | 1.00 | 0.96 | P   | 151.63 | 4.12 | 0.00 | P    | 615.67  | KIAA1600  | 10q26.11      |
| 232149_s_at  | 0.95 | 0.85 | P   | 73.00  | 4.12 | 0.00 | P    | 298.97  | NSMAF     | 8q12-q13      |
| 219210_s_at  | 0.99 | 0.94 | A   | 71.67  | 4.11 | 0.00 | P    | 291.83  | RAB8B     | 15q22.1       |
| 232568_at    | 1.00 | 0.97 | PA  | 32.17  | 4.11 | 0.02 | P    | 133.37  | MGC24103  | 9p22.2        |
| 228693_at    | 0.99 | 0.95 | P   | 135.03 | 4.11 | 0.00 | P    | 546.00  | C3orf6    | 3q28          |
| 225726_s_at  | 1.00 | 0.92 | P   | 119.53 | 4.11 | 0.00 | P    | 710.37  | RLEKHH1   | 16q24.1       |
| 202570_s_at  | 1.00 | 0.99 | P   | 76.47  | 4.11 | 0.01 | P    | 311.27  | DLGAP4    | 20q11.23      |
| 210015_s_at  | 0.99 | 0.92 | PA  | 50.50  | 4.10 | 0.00 | P    | 203.90  | MAP2      | 2q34-q35      |
| 242251_at    | 0.98 | 0.90 | PA  | 60.20  | 4.10 | 0.01 | P    | 245.47  |           |               |
| 224663_s_at  | 1.00 | 0.96 | P   | 187.57 | 4.10 | 0.00 | P    | 757.33  | OFL2      | 14q12         |
| 210493_s_at  | 0.99 | 0.94 | P,M | 26.53  | 4.10 | 0.00 | P    | 107.27  | KIAA0626  | 4q32.3        |

|              |      |      |       |         |      |      |     |         |                      |
|--------------|------|------|-------|---------|------|------|-----|---------|----------------------|
| 243332_at    | 0.97 | 0.88 | A     | 11.33   | 4.06 | 0.03 | P   | 47.67   |                      |
| 235783_at    | 0.99 | 0.94 | P.M   | 120.27  | 4.06 | 0.00 | P   | 480.83  |                      |
| 205687_at    | 0.99 | 0.92 | P     | 90.83   | 4.06 | 0.00 | P   | 364.10  | UBPH 16p12           |
| 243746_at    | 0.99 | 0.93 | A     | 13.00   | 4.05 | 0.00 | P   | 51.90   | IGHMBP2 1a13.2-q13.4 |
| 218516_s_at  | 0.98 | 0.90 | P     | 104.47  | 4.05 | 0.00 | P   | 419.30  | FLJ20421 8q11.23     |
| 226184_at    | 0.97 | 0.89 | P     | 412.83  | 4.04 | 0.00 | P   | 1651.60 | FMNL2 2q24.1         |
| 1559052_s_at | 0.96 | 0.86 | P     | 88.93   | 4.04 | 0.00 | P   | 360.20  | PAK2 3q29            |
| 218981_at    | 0.98 | 0.90 | P     | 142.70  | 4.04 | 0.00 | P   | 572.67  | ACNS9 7q22.1         |
| 207387_s_at  | 0.99 | 0.95 | M.A   | 42.90   | 4.03 | 0.00 | P   | 167.00  | GK q2p1.3            |
| 227889_at    | 0.99 | 0.93 | P     | 302.27  | 4.03 | 0.00 | P   | 1203.10 | CAPNS2 16q13         |
| 214447_at    | 0.99 | 0.95 | A     | 28.77   | 4.03 | 0.00 | P   | 113.70  | ETS1 11q23.3         |
| 238422_at    | 0.99 | 0.95 | A     | 50.40   | 4.03 | 0.00 | P   | 200.73  | LOC151534 2p13.1     |
| 222288_at    | 1.00 | 0.96 | P     | 121.90  | 4.01 | 0.01 | P   | 485.20  |                      |
| 227554_at    | 0.98 | 0.89 | P     | 96.47   | 4.01 | 0.00 | P   | 378.37  |                      |
| 1569495_at   | 1.00 | 0.99 | A     | 31.77   | 4.01 | 0.00 | P.A | 125.57  | FLJ30655 4q28.2      |
| 59705_at     | 1.00 | 0.99 | P     | 40.47   | 4.01 | 0.00 | P   | 159.93  | SCLY 2q37.3          |
| 242138_at    | 0.99 | 0.94 | P     | 94.80   | 4.00 | 0.00 | P   | 374.40  | DLX1 2q32            |
| 223234_at    | 1.00 | 0.96 | P     | 186.80  | 4.00 | 0.00 | P   | 738.03  | MAD2L2 1p36          |
| 229371_at    | 1.00 | 0.96 | P.A   | 54.60   | 4.00 | 0.00 | P   | 215.73  |                      |
| 219312_s_at  | 0.99 | 0.94 | P     | 49.30   | 4.00 | 0.00 | P   | 194.57  | ZBTB10 8q13-q21.1    |
| 201481_s_at  | 0.99 | 0.94 | M.A   | 427.60  | 4.00 | 0.00 | P   | 1686.13 | PYGB 0p11.2-p11.1    |
| 1554026_a_at | 0.99 | 0.92 | A     | 49.67   | 4.00 | 0.01 | P   | 196.50  | MYO10 3p15.1-p14.3   |
| 224932_at    | 1.00 | 0.97 | P     | 881.80  | 3.99 | 0.00 | P   | 3462.43 | LOC400916 22q11.23   |
| 213848_at    | 1.00 | 0.96 | P     | 111.63  | 3.99 | 0.00 | P   | 438.80  | DUSP7 3p21           |
| 227293_at    | 1.00 | 0.95 | P     | 43.80   | 3.98 | 0.00 | P   | 171.17  | LNK 4q12             |
| 222116_s_at  | 1.00 | 0.97 | P     | 476.30  | 3.98 | 0.00 | P   | 1864.63 | TBC1D16 17q25.3      |
| 218007_s_at  | 1.00 | 0.99 | P     | 1077.93 | 3.98 | 0.00 | P   | 4216.90 | RPS27L 15q22.1       |
| 229549_at    | 1.00 | 0.96 | P     | 197.63  | 3.98 | 0.00 | P   | 771.17  | CALU 7q32            |
| 224002_s_at  | 0.99 | 0.96 | P     | 39.02   | 3.97 | 0.00 | P   | 153.47  | FKBP7 2q31.3         |
| 244660_at    | 0.95 | 0.85 | P.A   | 12.83   | 3.97 | 0.00 | P   | 51.00   | ELAVL1 19p13.2       |
| 207680_x_at  | 1.00 | 0.95 | A     | 22.60   | 3.96 | 0.00 | P   | 88.60   | PAX3 2q35            |
| 221935_s_at  | 1.00 | 0.98 | P     | 114.07  | 3.96 | 0.00 | P   | 445.67  | MGC34132 3p14.2      |
| 203542_s_at  | 1.00 | 0.97 | A     | 33.93   | 3.96 | 0.00 | P   | 132.10  | BTEB1 9q13           |
| 213055_at    | 1.00 | 0.98 | A     | 88.87   | 3.95 | 0.00 | P   | 655.57  | GRSP1 3p14.2         |
| 203269_at    | 0.99 | 0.92 | P     | 267.43  | 3.94 | 0.00 | P   | 1042.20 | NSMAF 8q12-q13       |
| 203736_s_at  | 0.96 | 0.86 | P.A   | 27.37   | 3.94 | 0.00 | P   | 107.97  | PPFIBP1 12p12.1      |
| 212117_at    | 0.99 | 0.93 | P     | 189.37  | 3.94 | 0.00 | P   | 736.83  | RHOQ 2p21            |
| 205679_x_at  | 1.00 | 0.97 | A     | 51.43   | 3.94 | 0.00 | P   | 199.07  | AGC1 15q26.1         |
| 205690_at    | 1.00 | 0.97 | A     | 75.80   | 3.93 | 0.00 | P   | 298.30  | NARGA 16p13.3        |
| 1555154_a_at | 0.99 | 0.94 | P.M   | 48.90   | 3.93 | 0.01 | P   | 193.07  | OQI 6q26-27          |
| 1566826_at   | 0.97 | 0.87 | A     | 10.97   | 3.92 | 0.00 | P.M | 42.03   |                      |
| 1569701_at   | 1.00 | 0.95 | P     | 21.10   | 3.92 | 0.00 | P   | 82.00   | PER3 1p36.23         |
| 1558801_at   | 0.98 | 0.91 | P     | 135.60  | 3.92 | 0.00 | P   | 525.60  |                      |
| 211515_s_at  | 0.96 | 0.86 | P     | 6.43    | 3.92 | 0.00 | P   | 252.50  | DustyPK 1q32.1       |
| 224352_s_at  | 1.00 | 0.96 | P     | 102.43  | 3.92 | 0.00 | P   | 395.17  | CFL2 14q12           |
| 213549_at    | 0.99 | 0.95 | P     | 85.60   | 3.91 | 0.00 | P   | 331.03  | SLC18A2 10q25        |
| 203157_s_at  | 0.99 | 0.92 | A     | 54.03   | 3.91 | 0.00 | P   | 208.57  | GLS 2q32-q34         |
| 1552660_a_at | 0.98 | 0.91 | P     | 116.23  | 3.90 | 0.00 | P   | 490.87  | FLJ1193 5p13.3       |
| 219033_at    | 0.96 | 0.86 | A     | 41.43   | 3.90 | 0.00 | P   | 158.10  | FLJ21308 5q11.2      |
| 201089_at    | 1.00 | 0.95 | P     | 630.03  | 3.90 | 0.00 | P   | 2426.07 | ATP6V1B2 8p22-p21    |
| 1558815_at   | 0.99 | 0.92 | A     | 15.20   | 3.89 | 0.01 | P   | 59.57   | ARGBP2 4q35.1        |
| 222121_at    | 0.98 | 0.90 | P     | 29.33   | 3.89 | 0.00 | P   | 112.73  | SGEF 3q25.2          |
| 1556704_s_at | 1.00 | 0.96 | A     | 8.17    | 3.89 | 0.01 | P   | 31.50   | LOC286297 9q12       |
| 1550285_at   | 0.97 | 0.88 | P.A   | 16.27   | 3.88 | 0.00 | P   | 83.30   |                      |
| 215079_at    | 0.99 | 0.94 | A     | 22.33   | 3.88 | 0.00 | P.M | 85.97   |                      |
| 236219_at    | 0.99 | 0.95 | P     | 34.93   | 3.88 | 0.00 | P   | 133.10  | TMEM20 10q23.33      |
| 242635_s_at  | 0.98 | 0.90 | P     | 29.57   | 3.87 | 0.00 | P   | 113.07  | NAPE-PLD 7q22.1      |
| 225158_at    | 0.98 | 0.90 | P     | 282.07  | 3.87 | 0.00 | P   | 1081.97 | EPG1 3q25.1-q26.2    |
| 214279_s_at  | 0.97 | 0.89 | A     | 32.37   | 3.87 | 0.00 | P   | 126.10  | NDRG2 14q11.2        |
| 226773_at    | 1.00 | 0.98 | P.A   | 94.83   | 3.87 | 0.00 | P   | 360.90  |                      |
| 223376_s_at  | 0.99 | 0.94 | P     | 810.00  | 3.86 | 0.00 | P   | 3071.67 | BRI3 7q22.1          |
| 212811_x_at  | 1.00 | 0.96 | P     | 395.13  | 3.86 | 0.00 | P   | 1504.90 | SLC1A4 2p15-p13      |
| 235197_s_at  | 1.00 | 0.98 | P     | 67.83   | 3.86 | 0.00 | P   | 258.27  |                      |
| 1558766_at   | 0.96 | 0.86 | A     | 17.00   | 3.86 | 0.00 | P.A | 65.07   |                      |
| 227335_s_at  | 0.99 | 0.93 | P     | 141.17  | 3.86 | 0.00 | P   | 537.23  | C20orf158 20q13.33   |
| 226844_at    | 0.99 | 0.94 | P.M   | 55.10   | 3.85 | 0.00 | P   | 209.80  | MOBK2B 9p21.1        |
| 235709_at    | 0.99 | 0.94 | A     | 186.00  | 3.85 | 0.00 | P   | 707.63  | LOC283431 12q23.3    |
| 207836_s_at  | 1.00 | 0.97 | P     | 56.47   | 3.84 | 0.00 | P   | 214.03  | RBPM5 8p12-p11       |
| 222945_at    | 0.99 | 0.94 | P.A   | 25.77   | 3.84 | 0.01 | P.M | 99.23   | SFRS1 17q21.31-q22   |
| 229869_at    | 0.99 | 0.94 | A     | 26.80   | 3.84 | 0.01 | P   | 102.47  |                      |
| 227580_s_at  | 0.99 | 0.92 | P     | 146.30  | 3.84 | 0.00 | P   | 551.60  | FZP434B03 7q22.1     |
| 203217_s_at  | 0.99 | 0.93 | P.A   | 229.53  | 3.84 | 0.00 | P   | 864.80  | SIAT9 2p11.2         |
| 211698_at    | 1.00 | 0.97 | P     | 536.50  | 3.83 | 0.00 | P   | 2027.30 | GRH1 5q21.1-q21.2    |
| 204210_s_at  | 0.99 | 0.92 | P     | 33.03   | 3.83 | 0.00 | P   | 124.70  | PCYT1A 3q29          |
| 225202_at    | 0.98 | 0.91 | P     | 482.53  | 3.83 | 0.00 | P   | 1827.03 | RHOBTB3 5q15         |
| 239208_s_at  | 0.98 | 0.90 | P.A   | 55.00   | 3.83 | 0.00 | P   | 208.57  |                      |
| 223173_at    | 1.00 | 0.95 | P     | 207.23  | 3.83 | 0.00 | P   | 783.90  | SPINL 16p12.1        |
| 220482_s_at  | 1.00 | 0.95 | P.A   | 31.90   | 3.83 | 0.01 | P   | 122.53  | DELGEF 11p14.3       |
| 239000_at    | 1.00 | 0.99 | P     | 32.93   | 3.83 | 0.00 | P   | 124.20  |                      |
| 212658_at    | 1.00 | 0.98 | P     | 207.23  | 3.83 | 0.00 | P   | 780.37  | LHFP2L2 5q14.1       |
| 221591_s_at  | 1.00 | 0.99 | P     | 381.27  | 3.83 | 0.00 | P   | 1435.60 | FLJ10156 17p13.2     |
| 221489_s_at  | 1.00 | 0.97 | P     | 279.23  | 3.83 | 0.00 | P   | 1051.03 | SPRY4 5q31.3         |
| 1554890_a_at | 1.00 | 0.97 | P.A   | 55.23   | 3.82 | 0.01 | P   | 210.30  | TACD1 8p11           |
| 205907_at    | 0.99 | 0.92 | P     | 43.60   | 3.82 | 0.00 | P   | 163.63  | TNFSF9 19p13.3       |
| 202675_s_at  | 1.00 | 0.96 | P     | 319.93  | 3.82 | 0.00 | P   | 1201.73 | SDHB 1p36.1-p35      |
| 202158_s_at  | 1.00 | 0.97 | P     | 237.33  | 3.82 | 0.00 | P   | 893.53  | CUGBP2 10p13         |
| 226713_at    | 0.99 | 0.93 | P     | 169.83  | 3.81 | 0.00 | P   | 638.93  | C3orf6 3q28          |
| 202975_s_at  | 0.99 | 0.93 | P     | 445.30  | 3.81 | 0.00 | P   | 1673.87 | RHOBTB3 5q15         |
| 207833_at    | 0.97 | 0.89 | A     | 25.80   | 3.80 | 0.00 | P   | 97.70   | P15 8q13.3           |
| 226532_at    | 1.00 | 0.96 | P     | 112.50  | 3.80 | 0.00 | P   | 421.83  |                      |
| 240926_at    | 0.97 | 0.88 | P.A   | 21.77   | 3.80 | 0.00 | P   | 82.53   | MGC4126 3q29         |
| 212119_at    | 1.00 | 0.98 | P.M   | 408.67  | 3.80 | 0.00 | P   | 1525.07 | RHOQ 2p21            |
| 204624_at    | 0.98 | 0.91 | P     | 62.23   | 3.80 | 0.00 | P   | 233.20  | ATP7B 13q14.2-q21    |
| 205900_s_at  | 1.00 | 0.98 | P     | 64.90   | 3.79 | 0.00 | P   | 314.90  | SLC16A1 7q31         |
| 230426_at    | 1.00 | 0.95 | P     | 128.07  | 3.79 | 0.00 | P   | 479.13  | DL2 7q31-q32         |
| 212632_at    | 0.99 | 0.95 | P     | 271.80  | 3.79 | 0.00 | P   | 1012.63 |                      |
| 202446_s_at  | 0.99 | 0.94 | P     | 790.80  | 3.79 | 0.00 | P   | 2961.43 | PLSCR1 3q23          |
| 235759_at    | 0.98 | 0.90 | P.A   | 16.10   | 3.78 | 0.01 | P   | 60.10   | EFCB1P1 8q21.3       |
| 202132_at    | 1.00 | 0.97 | P     | 186.07  | 3.78 | 0.00 | P   | 507.27  | TAZ 3q23-q24         |
| 224833_at    | 1.00 | 0.96 | P     | 359.70  | 3.78 | 0.00 | P   | 1336.93 | ETS1 11q23.3         |
| 1554691_a_at | 0.98 | 0.91 | P     | 310.17  | 3.78 | 0.00 | P   | 1170.33 | PACSIN2 2q13.2-13.33 |
| 243829_at    | 0.99 | 0.93 | P     | 26.57   | 3.77 | 0.00 | P   | 99.37   | BRAF 7q34            |
| 217997_at    | 1.00 | 0.99 | P     | 127.80  | 3.77 | 0.00 | P   | 474.33  | PHLDA1 12q15         |
| 243591_at    | 0.97 | 0.87 | A     | 44.20   | 3.77 | 0.01 | P   | 167.00  |                      |
| 243846_x_at  | 0.97 | 0.88 | P.A   | 23.33   | 3.77 | 0.01 | P   | 87.13   |                      |
| 226794_at    | 1.00 | 0.98 | P     | 43.17   | 3.76 | 0.00 | P   | 160.30  | STXBP5 6q24.3        |
| 209234_at    | 0.98 | 0.91 | P.M.A | 89.50   | 3.76 | 0.00 | P   | 332.93  | KIF1B 1p36.2         |
| 214776_x_at  | 0.98 | 0.91 | P.M.A | 7.00    | 3.76 | 0.00 | P   | 28.90   | XYLB 3p22-p21.3      |
| 205894_at    | 0.99 | 0.94 | P     | 131.73  | 3.76 | 0.00 | P   | 490.30  | BCAP29 7q22-q31      |
| 241542_at    | 0.98 | 0.89 | A     | 23.67   | 3.76 | 0.01 | P   | 88.23   |                      |
| 221986_s_at  | 0.98 | 0.90 | P     | 34.17   | 3.75 | 0.00 | P   | 126.67  | DRE1 3q27.3          |
| 209504_s_at  | 0.99 | 0.95 | A     | 82.27   | 3.74 | 0.00 | P   | 303.80  | PLEKHB1 1q13.5-q14.1 |
| 1559307_s_at | 0.97 | 0.88 | P     | 17.63   | 3.74 | 0.00 | P   | 65.33   | RBL1 20q11.2         |
| 200982_s_at  | 0.99 | 0.96 | P.A   | 331.87  | 3.74 | 0.00 | P   | 1220.27 | ANKXB 8q24-q24       |
| 203304_at    | 0.99 | 0.95 | P     | 428.73  | 3.74 | 0.00 | P   | 1572.93 | BAMBI 0p12.3-p11.2   |
| 230652_at    | 0.95 | 0.84 | P.A   | 18.80   | 3.74 | 0.01 | P   | 70.07   | TIMP1 0p11.3-p11.23  |
| 205296_at    | 0.99 | 0.94 | P     | 107.57  | 3.74 | 0.00 | P   | 397.07  | RBL1 20q11.2         |
| 242769_at    | 0.99 | 0.95 | P     | 20.93   | 3.74 | 0.00 | P   | 77.10   |                      |
| 215985_at    | 0.97 | 0.88 | P.A   | 20.87   | 3.74 | 0.00 | P   | 76.57   |                      |
| 235174_s_at  | 1.00 | 0.97 | P     | 116.37  | 3.72 | 0.00 | P   | 428.73  |                      |
| 243945_at    | 0.98 | 0.91 | A     | 8.67    | 3.72 | 0.00 | P   | 31.90   | TRIM2 4q31.3         |
| 212402_at    | 0.99 | 0.94 | P     | 161.53  | 3.72 | 0.00 | P   | 593.80  | KIAA0853 13q14.11    |
| 222798_at    | 0.99 | 0.94 | P     | 108.73  | 3.72 | 0.01 | P   | 401.73  | PTER 10p12           |
| 201086_at    | 0.99 | 0.94 | P     | 89.63   | 3.71 | 0.00 | P   | 323.27  | CYC1 8q24.3          |
| 204017_at    | 1.00 | 0.98 | P     | 251.97  | 3.71 | 0.00 | P   | 919.67  | KDELR3 22q13.1       |
| 201802_at    | 0.99 | 0.95 | P     | 162.43  | 3.71 | 0.00 | P   | 594.70  | SLC29A1 3p21.1-p21.  |

|              |      |      |       |         |      |      |    |         |                       |
|--------------|------|------|-------|---------|------|------|----|---------|-----------------------|
| 227167_s_at  | 0.99 | 0.94 | P     | 329.90  | 3.68 | 0.00 | P  | 1199.20 |                       |
| 213107_at    | 0.99 | 0.94 | P     | 67.97   | 3.68 | 0.00 | P  | 245.53  | TNIK 3q26.31          |
| 238756_at    | 1.00 | 0.97 | P     | 414.67  | 3.68 | 0.00 | P  | 1502.37 | LOC283431 12q23.3     |
| 223342_at    | 0.99 | 0.93 | PM    | 39.27   | 3.67 | 0.00 | P  | 142.07  |                       |
| 40420_at     | 0.99 | 0.93 | P     | 159.20  | 3.67 | 0.00 | P  | 573.27  | STK10 5q35.1          |
| 212419_at    | 0.99 | 0.92 | A     | 71.77   | 3.67 | 0.00 | P  | 260.03  | C10orf56 10q23.1      |
| 209307_at    | 0.97 | 0.88 | P     | 286.23  | 3.67 | 0.00 | P  | 1040.10 | SWAP70 11p15          |
| 203223_at    | 1.00 | 0.96 | PA    | 31.33   | 3.67 | 0.02 | P  | 115.87  | RABEP1 17p13.3        |
| 241534_at    | 0.99 | 0.94 | P     | 12.13   | 3.67 | 0.01 | P  | 44.27   | ATPB1 18q21           |
| 227408_s_at  | 0.99 | 0.95 | P     | 69.90   | 3.67 | 0.00 | P  | 251.80  | SNX25 4q35.1          |
| 65585_at     | 1.00 | 0.95 | P     | 145.73  | 3.66 | 0.01 | P  | 534.07  | MGC16279 8p23.1       |
| 242844_at    | 0.98 | 0.91 | P     | 98.53   | 3.66 | 0.00 | P  | 356.30  | PGGT1B 5q23.1         |
| 202561_at    | 1.00 | 0.97 | P     | 589.83  | 3.66 | 0.00 | P  | 2122.77 | HSPA1B 6p21.3         |
| 205142_x_at  | 1.00 | 0.98 | PA    | 126.87  | 3.66 | 0.00 | P  | 457.83  | ABOD1 xq28            |
| 212459_x_at  | 1.00 | 0.97 | P     | 412.83  | 3.66 | 0.00 | P  | 1484.53 | SUCLG2 3p14.3         |
| 201506_at    | 1.00 | 0.99 | P     | 288.30  | 3.65 | 0.00 | P  | 1036.13 | TGFB1 5q31            |
| 223220_s_at  | 0.99 | 0.92 | P     | 174.03  | 3.65 | 0.00 | P  | 627.43  | BAL 3q13-q21          |
| 205492_s_at  | 0.96 | 0.85 | A     | 16.10   | 3.65 | 0.00 | PA | 58.33   | DPYSL4 10q26          |
| 38037_at     | 0.96 | 0.86 | A     | 84.70   | 3.65 | 0.00 | P  | 159.40  | DTR 5q23              |
| 242474_s_at  | 1.00 | 0.96 | A     | 24.87   | 3.65 | 0.01 | P  | 90.57   | LOC203547 xq28        |
| 234975_at    | 1.00 | 0.97 | P     | 44.27   | 3.65 | 0.00 | P  | 159.17  | GSPT1 16p13.1         |
| 222206_s_at  | 1.00 | 0.98 | P     | 112.47  | 3.65 | 0.00 | P  | 404.87  | LOC56926 19p13.3      |
| 242450_at    | 0.99 | 0.92 | A     | 10.70   | 3.64 | 0.00 | P  | 38.30   | RGMB 5q21.1           |
| 242308_at    | 0.99 | 0.93 | A     | 88.17   | 3.64 | 0.01 | P  | 248.70  | MCOLN3 19q23          |
| 227700_x_at  | 1.00 | 1.00 | P     | 208.87  | 3.64 | 0.00 | P  | 750.33  | ATAD3A 1p36.33        |
| 208964_s_at  | 1.00 | 0.97 | P     | 226.93  | 3.64 | 0.00 | P  | 810.10  | FADS1 1q12.2-q13.1    |
| 219648_at    | 1.00 | 0.97 | P     | 518.97  | 3.63 | 0.00 | P  | 1856.63 | FLJ10116 2q35         |
| 225171_at    | 1.00 | 0.95 | P     | 186.07  | 3.63 | 0.00 | P  | 665.60  | ARHGAP18 6q23.1       |
| 225331_at    | 1.00 | 0.96 | P     | 65.93   | 3.63 | 0.00 | P  | 151.83  | C3orf6 3q28           |
| 215772_x_at  | 1.00 | 0.96 | P     | 421.03  | 3.62 | 0.00 | P  | 1502.90 | SUCLG2 3p14.3         |
| 235875_at    | 1.00 | 0.98 | PA    | 62.17   | 3.62 | 0.01 | P  | 224.10  |                       |
| 240466_at    | 0.96 | 0.87 | A     | 13.30   | 3.62 | 0.00 | P  | 47.87   |                       |
| 200765_s_at  | 1.00 | 0.96 | P     | 349.87  | 3.62 | 0.00 | P  | 1248.27 | CTNNA1 5q31           |
| 200824_at    | 1.00 | 0.97 | P     | 89.37   | 3.62 | 0.00 | P  | 3075.30 | GSTP1 11q13           |
| 233899_x_at  | 1.00 | 0.96 | P     | 65.87   | 3.62 | 0.00 | P  | 235.43  | ZBTB10 8q13-q21.1     |
| 218330_s_at  | 1.00 | 0.97 | P     | 270.83  | 3.62 | 0.01 | P  | 967.20  | NAV2 11p15.1          |
| 213109_at    | 0.97 | 0.87 | P     | 60.50   | 3.62 | 0.00 | P  | 214.10  | TNIK 3q26.31          |
| 221638_s_at  | 0.99 | 0.94 | A     | 28.60   | 3.62 | 0.00 | P  | 102.43  | STX16 20q13.32        |
| 1559133_x_at | 0.97 | 0.88 | PA    | 18.80   | 3.61 | 0.00 | P  | 67.21   | FZD3-13G17 5q15       |
| 201470_at    | 0.99 | 0.94 | P     | 1264.87 | 3.61 | 0.00 | P  | 4477.57 | GSTO1 10q25.1         |
| 208460_at    | 1.00 | 0.98 | M.A   | 63.00   | 3.61 | 0.01 | P  | 227.37  | GJAT 17q21.31         |
| 225882_at    | 0.98 | 0.90 | P     | 77.07   | 3.61 | 0.00 | P  | 275.13  | SLC35B4 7q33          |
| 238258_at    | 0.98 | 0.89 | P     | 20.67   | 3.60 | 0.02 | P  | 74.40   | RHOQ 2p21             |
| 209625_at    | 1.00 | 0.96 | PA    | 95.97   | 3.60 | 0.00 | P  | 343.27  | FIGH 14q11-q24        |
| 235227_at    | 0.97 | 0.88 | A     | 29.73   | 3.60 | 0.00 | P  | 104.60  |                       |
| 206308_at    | 0.95 | 0.84 | PA    | 35.67   | 3.60 | 0.01 | P  | 128.57  | DNMT2 10p15.1         |
| 238444_at    | 0.98 | 0.90 | A     | 10.93   | 3.59 | 0.02 | PM | 39.60   | ZNF618 9q33.1         |
| 223700_at    | 0.99 | 0.94 | P     | 119.00  | 3.59 | 0.01 | P  | 424.57  | GJAJ 4q31.3           |
| 219051_x_at  | 1.00 | 0.96 | PM    | 156.83  | 3.59 | 0.02 | P  | 565.73  | C16orf23 16p13.3      |
| 229327_s_at  | 0.97 | 0.88 | A     | 4.47    | 3.59 | 0.00 | P  | 15.97   | MAF 16q22-q23         |
| 239614_x_at  | 0.96 | 0.86 | PM    | 20.63   | 3.59 | 0.00 | P  | 73.63   |                       |
| 63825_at     | 0.99 | 0.94 | P     | 167.60  | 3.59 | 0.00 | P  | 594.67  | ABHD2 15q26.1         |
| 225551_at    | 1.00 | 0.97 | A     | 177.97  | 3.59 | 0.01 | P  | 634.53  | CABLES1 18q11.2       |
| 232953_s_at  | 0.99 | 0.95 | P     | 117.00  | 3.58 | 0.00 | P  | 413.80  | DELG6 11q15           |
| 217992_s_at  | 0.99 | 0.95 | P     | 191.53  | 3.58 | 0.00 | P  | 677.33  | EFHD2 1p36.13         |
| 202032_s_at  | 0.98 | 0.91 | P     | 274.53  | 3.58 | 0.00 | P  | 961.67  | MAN2A2 15q26.1        |
| 217118_s_at  | 1.00 | 0.99 | P     | 237.93  | 3.58 | 0.00 | P  | 837.67  | KIAA0930 22q13.31     |
| 218402_s_at  | 1.00 | 0.97 | A     | 125.30  | 3.58 | 0.00 | P  | 446.33  | HPS4 22cen-q12.3      |
| 221540_s_at  | 1.00 | 0.97 | P     | 196.90  | 3.57 | 0.00 | P  | 694.93  | GTF2H2 3q12-q13.3     |
| 210976_s_at  | 1.00 | 0.98 | P     | 351.80  | 3.57 | 0.00 | P  | 1240.17 | PFKM 12q13.3          |
| 218501_at    | 1.00 | 0.98 | P     | 193.70  | 3.57 | 0.00 | P  | 678.30  | ARHGGEF3 3p21-p13     |
| 201505_at    | 1.00 | 0.97 | P     | 194.40  | 3.56 | 0.01 | P  | 684.73  | LAMB1 7q22            |
| 212826_s_at  | 1.00 | 0.96 | P     | 1007.53 | 3.56 | 0.00 | P  | 3539.17 | SLC25A6 22c2.3 and vp |
| 210837_s_at  | 1.00 | 0.96 | P.M.A | 18.73   | 3.56 | 0.00 | P  | 42.10   | PDE4D 5q15            |
| 236249_at    | 0.99 | 0.92 | P     | 57.30   | 3.55 | 0.01 | P  | 202.03  | IKIP 12q23.1          |
| 209147_s_at  | 0.99 | 0.92 | PA    | 87.07   | 3.55 | 0.00 | P  | 306.03  | PPAP2A 9q11           |
| 227615_at    | 1.00 | 0.95 | P     | 88.33   | 3.55 | 0.00 | P  | 308.07  | TFIP11 22q12.1        |
| 227295_at    | 0.99 | 0.93 | P     | 59.03   | 3.54 | 0.00 | P  | 206.53  | IKIP 12q23.1          |
| 243904_at    | 0.99 | 0.95 | P     | 47.83   | 3.54 | 0.00 | P  | 166.93  |                       |
| 243816_at    | 0.99 | 0.95 | P     | 65.17   | 3.54 | 0.00 | P  | 227.57  |                       |
| 221815_at    | 0.98 | 0.91 | PA    | 63.43   | 3.54 | 0.01 | P  | 224.97  | ABHD2 15q26.1         |
| 221571_at    | 1.00 | 0.98 | P.M.A | 95.90   | 3.54 | 0.00 | P  | 334.70  | TRAF3 14q32.33        |
| 218056_at    | 1.00 | 0.97 | P     | 348.00  | 3.53 | 0.00 | P  | 1213.70 | BPAR 16p13.13         |
| 200742_s_at  | 0.99 | 0.91 | P     | 194.37  | 3.53 | 0.00 | P  | 687.47  | CLNZ 11p15            |
| 213906_at    | 0.97 | 0.88 | P     | 112.93  | 3.53 | 0.00 | P  | 394.73  | MYBL1 8q22            |
| 219952_s_at  | 1.00 | 0.98 | A     | 172.43  | 3.53 | 0.00 | P  | 601.83  | MCOLN1 9p13.3-p13.2   |
| 225485_at    | 1.00 | 0.97 | P     | 242.57  | 3.52 | 0.00 | P  | 843.73  | TSGA14 7q32           |
| 209737_at    | 1.00 | 0.97 | PA    | 20.03   | 3.52 | 0.01 | P  | 69.97   | AIP1 7q21             |
| 222866_at    | 0.98 | 0.91 | A     | 70.53   | 3.52 | 0.00 | P  | 243.83  | PPA2 4q15             |
| 1555468_at   | 1.00 | 0.97 | P     | 51.07   | 3.52 | 0.01 | P  | 178.33  | NRP2 2q33.3           |
| 225810_at    | 1.00 | 0.99 | P     | 94.40   | 3.52 | 0.00 | P  | 327.43  | FLJ20313 15q13.1      |
| 220444_at    | 0.99 | 0.92 | A     | 29.10   | 3.52 | 0.01 | P  | 101.83  | ZNF557 19p13.3        |
| 228702_at    | 1.00 | 0.97 | P.M.A | 88.20   | 3.52 | 0.00 | P  | 305.17  | FLJ43663 7q32.3       |
| 243905_at    | 0.98 | 0.91 | PA    | 12.43   | 3.52 | 0.02 | P  | 44.30   |                       |
| 204288_s_at  | 0.98 | 0.89 | A     | 68.23   | 3.52 | 0.00 | P  | 236.80  | ARGBP2 4q35.1         |
| 203827_at    | 0.99 | 0.94 | P     | 215.77  | 3.52 | 0.00 | P  | 748.90  | FLJ10055 17q24.3      |
| 1564887_at   | 0.99 | 0.94 | PA    | 23.17   | 3.52 | 0.01 | P  | 81.53   |                       |
| 243740_at    | 0.99 | 0.93 | A     | 28.00   | 3.51 | 0.00 | P  | 97.17   |                       |
| 203343_at    | 1.00 | 0.99 | P     | 394.70  | 3.51 | 0.00 | P  | 1363.20 | UGDH 4p15.1           |
| 203631_s_at  | 0.97 | 0.87 | A     | 45.23   | 3.51 | 0.00 | P  | 157.70  | GPRC5B 16p12          |
| 231840_x_at  | 1.00 | 0.99 | P     | 133.67  | 3.51 | 0.00 | P  | 461.77  | LOC90624 5q31.1       |
| 225851_at    | 0.99 | 0.92 | PA    | 211.03  | 3.51 | 0.00 | P  | 729.80  | FN1B 14q23-q24        |
| 202069_s_at  | 0.98 | 0.90 | P     | 478.83  | 3.50 | 0.00 | P  | 1660.53 | IDH3A 5q25.1-q25.2    |
| 215455_s_at  | 0.98 | 0.89 | PA    | 68.83   | 3.50 | 0.00 | P  | 238.93  | ICAM1 9p13.3-p13.2    |
| 235204_at    | 1.00 | 0.96 | P     | 59.23   | 3.50 | 0.00 | P  | 204.17  | ENTPD7 17q24.3        |
| 226030_at    | 1.00 | 0.97 | P     | 82.80   | 3.49 | 0.00 | P  | 284.70  | ACADS 10q25-q26       |
| 224860_at    | 1.00 | 0.97 | PA    | 31.27   | 3.49 | 0.01 | P  | 108.03  | C9orf123 9p24.1       |
| 200770_s_at  | 1.00 | 0.97 | PM    | 166.90  | 3.49 | 0.00 | P  | 574.40  | LAMC1 1q11            |
| 218121_at    | 0.98 | 0.89 | A     | 53.47   | 3.49 | 0.01 | P  | 185.77  | HMOX2 16p13.3         |
| 225420_at    | 0.97 | 0.88 | P     | 117.40  | 3.49 | 0.00 | P  | 404.70  | GPAM 10q25.3          |
| 239735_at    | 1.00 | 0.96 | P     | 77.13   | 3.49 | 0.02 | P  | 272.20  |                       |
| 229833_at    | 1.00 | 0.97 | A     | 84.83   | 3.48 | 0.01 | P  | 295.70  |                       |
| 226955_at    | 0.99 | 0.92 | P     | 121.13  | 3.48 | 0.00 | P  | 416.40  | FLJ36748 5q33.1       |
| 201525_at    | 1.00 | 0.97 | A     | 126.53  | 3.48 | 0.00 | P  | 433.63  | APOD 3q26.2-qter      |
| 238619_at    | 0.96 | 0.86 | P     | 134.87  | 3.48 | 0.01 | P  | 459.60  |                       |
| 226684_at    | 1.00 | 0.96 | P     | 84.27   | 3.48 | 0.00 | P  | 288.17  | C14orf103 14q32.31    |
| 156744_a_at  | 0.98 | 0.90 | P     | 42.57   | 3.47 | 0.00 | P  | 145.20  |                       |
| 244106_at    | 0.99 | 0.95 | A     | 16.90   | 3.47 | 0.00 | P  | 57.73   |                       |
| 214508_x_at  | 0.99 | 0.94 | A     | 51.10   | 3.47 | 0.00 | P  | 174.20  | CREM 10p11.21         |
| 235296_at    | 1.00 | 0.97 | P     | 124.23  | 3.47 | 0.00 | P  | 423.83  | E1F5A2 3q26.2         |
| 233115_at    | 0.97 | 0.87 | P     | 32.97   | 3.47 | 0.00 | P  | 113.17  |                       |
| 242149_at    | 0.97 | 0.87 | P     | 153.83  | 3.47 | 0.00 | P  | 528.60  |                       |
| 230296_at    | 1.00 | 0.97 | P     | 206.90  | 3.46 | 0.00 | P  | 704.13  | LOC146174 16p12.3     |
| 227197_at    | 1.00 | 0.97 | P     | 122.07  | 3.46 | 0.00 | P  | 416.57  | SDEF 3q22             |
| 205356_at    | 1.00 | 0.95 | P     | 175.83  | 3.46 | 0.00 | P  | 597.10  | USP13 3q26.2-q26.3    |
| 225910_at    | 1.00 | 0.98 | P     | 157.87  | 3.46 | 0.00 | P  | 538.80  | LOC284015 17q24.3     |
| 204511_at    | 0.98 | 0.91 | A     | 70.40   | 3.46 | 0.01 | P  | 241.27  | FARP2 2q37.3          |
| 156964_at    | 0.99 | 0.94 | M.A   | 42.03   | 3.46 | 0.00 | P  | 143.73  | LOC284926 22q13.31    |
| 203842_s_at  | 1.00 | 0.99 | P     | 60.13   | 3.46 | 0.00 | P  | 516.52  | COBLL1 2q37.3         |
| 229883_at    | 1.00 | 0.99 | PM    | 60.03   | 3.46 | 0.00 | P  | 205.90  | GRIN2D 19q13.1-qter   |
| 1564906_at   | 0.96 | 0.86 | A     | 25.40   | 3.45 | 0.00 | PM | 87.43   | MATR3 5q31.3          |
| 213140_s_at  | 1.00 | 0.96 | P     | 360.00  | 3.45 | 0.00 | P  | 1222.53 | SS18L1 20q13.3        |
| 1568028_x_at | 0.99 | 0.93 | PM    | 60.03   | 3.44 | 0.00 | P  | 204.03  |                       |
| 224867_at    | 1.00 | 0.99 | P     | 955.27  | 3.44 | 0.00 | P  | 3231.37 | CG012 13q12-q13       |
| 226365_at    | 0.99 | 0.   |       |         |      |      |    |         |                       |

|              |      |      |       |        |             |      |       |         |           |                |
|--------------|------|------|-------|--------|-------------|------|-------|---------|-----------|----------------|
| 225949_at    | 0.97 | 0.89 | PA    | 145.63 | <b>3.42</b> | 0.00 | P     | 494.10  | LOC340371 | 8q24.3         |
| 203799_at    | 0.99 | 0.95 | P     | 68.33  | <b>3.42</b> | 0.00 | P     | 230.20  | DCL1      | 2q24.2         |
| 226077_at    | 1.00 | 0.96 | P     | 527.60 | <b>3.42</b> | 0.00 | P     | 1776.27 | FLJ31951  | 5q33.3         |
| 229113_s_at  | 1.00 | 0.95 | PA    | 161.33 | <b>3.42</b> | 0.00 | P     | 540.80  | FLJ31031  | 1p36.32        |
| 243586_at    | 0.96 | 0.86 | PA    | 12.87  | <b>3.41</b> | 0.02 | P     | 44.40   |           |                |
| 203159_at    | 1.00 | 0.97 | P     | 134.73 | <b>3.41</b> | 0.00 | P     | 451.57  | GLS       | 2q32-q34       |
| 235964_x_at  | 0.99 | 0.94 | P     | 52.93  | <b>3.41</b> | 0.00 | P     | 177.07  | FLJ46365  | 8q11.21        |
| 216483_s_at  | 1.00 | 0.96 | P     | 284.30 | <b>3.41</b> | 0.00 | P     | 956.03  | C19orf10  | 19p13.3        |
| 221187_s_at  | 0.95 | 0.85 | A     | 30.83  | <b>3.41</b> | 0.00 | P     | 106.39  | FLJ22688  | 19q13.33       |
| 227121_at    | 0.99 | 0.92 | A     | 41.77  | <b>3.41</b> | 0.00 | P     | 139.47  |           |                |
| 217309_s_at  | 0.98 | 0.91 | PA    | 98.07  | <b>3.41</b> | 0.00 | P     | 331.43  | DSCR3     | 21q22.2        |
| 235389_at    | 0.99 | 0.92 | PA    | 34.83  | <b>3.41</b> | 0.00 | P     | 116.43  | C20orf104 | 1q11.22-q11.23 |
| 212563_at    | 1.00 | 0.99 | P     | 219.77 | <b>3.40</b> | 0.00 | P     | 738.27  | BOPI      | 8q24.3         |
| 202637_s_at  | 0.99 | 0.94 | P     | 286.77 | <b>3.40</b> | 0.00 | P     | 962.63  | ICAM1     | 9p13.3-p13.2   |
| 221675_s_at  | 1.00 | 0.99 | P     | 425.83 | <b>3.40</b> | 0.00 | P     | 1424.70 | CHPT1     | 12q            |
| 212829_at    | 0.98 | 0.91 | P     | 170.27 | <b>3.40</b> | 0.01 | P     | 569.03  |           |                |
| 226782_at    | 1.00 | 1.00 | P     | 83.37  | <b>3.39</b> | 0.00 | P     | 278.47  | SLC25A30  | 13q14.11       |
| 219068_x_at  | 0.99 | 0.92 | P     | 160.93 | <b>3.39</b> | 0.00 | P     | 534.73  | ATAD3A    | 1p36.33        |
| 202464_s_at  | 1.00 | 0.98 | P     | 177.63 | <b>3.39</b> | 0.00 | P     | 592.47  | PFKFB3    | 10q14-p15      |
| 215329_s_at  | 0.96 | 0.86 | A     | 81.27  | <b>3.39</b> | 0.01 | PA    | 273.20  | CDC2L1    | 1p36           |
| 221985_at    | 1.00 | 0.99 | P     | 64.17  | <b>3.39</b> | 0.00 | P     | 214.07  | DRE1      | 3q27.3         |
| 202297_s_at  | 1.00 | 0.96 | P     | 527.23 | <b>3.39</b> | 0.00 | P     | 1759.73 | RER1      | 1pter-q24      |
| 211414_at    | 1.00 | 0.97 | A     | 15.43  | <b>3.39</b> | 0.01 | P     | 51.60   | GLS       | 2q32-q34       |
| 212253_at    | 1.00 | 0.98 | P     | 48.90  | <b>3.39</b> | 0.00 | P     | 160.07  | MAP1B     | 5q13           |
| 218549_s_at  | 1.00 | 0.97 | P     | 247.07 | <b>3.38</b> | 0.00 | P     | 821.77  | CGI-90    | 8q21.2         |
| 226902_at    | 1.00 | 0.99 | P     | 97.97  | <b>3.38</b> | 0.00 | P     | 326.07  | USP13     | 3q26.2-q26.3   |
| 201396_s_at  | 1.00 | 0.97 | P     | 135.90 | <b>3.38</b> | 0.00 | P     | 451.07  | SGTA      | 19p13          |
| 242494_at    | 1.00 | 0.98 | MA    | 21.00  | <b>3.38</b> | 0.01 | P     | 70.50   |           |                |
| 225955_at    | 1.00 | 0.98 | P     | 295.17 | <b>3.38</b> | 0.00 | P     | 449.93  | LOC284207 | 17q25.3        |
| 224744_at    | 0.99 | 0.92 | P     | 125.60 | <b>3.38</b> | 0.00 | P     | 418.73  | FLJ20421  | 8q11.23        |
| 200745_s_at  | 0.99 | 0.93 | P     | 726.90 | <b>3.37</b> | 0.00 | P     | 2423.47 | GNB1      | 1p36.33        |
| 212739_s_at  | 1.00 | 0.98 | P     | 400.13 | <b>3.37</b> | 0.00 | P     | 1327.20 | NME4      | 16p13.3        |
| 239960_x_at  | 1.00 | 0.95 | P     | 51.43  | <b>3.37</b> | 0.00 | P     | 171.17  | LOC90624  | 5q31.1         |
| 225115_at    | 1.00 | 1.00 | P     | 222.60 | <b>3.37</b> | 0.00 | P     | 737.53  | HIPK2     | 7q32-q34       |
| 235532_at    | 0.98 | 0.91 | A     | 43.20  | <b>3.37</b> | 0.00 | P     | 143.20  |           |                |
| 226980_at    | 0.99 | 0.94 | P     | 317.73 | <b>3.37</b> | 0.00 | P     | 1054.73 | XTP1      | 5q12.1         |
| 208682_s_at  | 1.00 | 0.98 | P     | 239.70 | <b>3.37</b> | 0.00 | P     | 793.77  | MAGED2    | xp11.2         |
| 227593_at    | 1.00 | 0.98 | P     | 77.33  | <b>3.37</b> | 0.00 | P     | 256.87  |           |                |
| 225564_at    | 0.99 | 0.92 | P     | 295.67 | <b>3.37</b> | 0.00 | P     | 409.30  | SPATA13   | 13q12.13       |
| 225545_at    | 0.99 | 0.92 | PA    | 247.47 | <b>3.36</b> | 0.00 | P     | 814.53  | EEF2K     | 16p12.3        |
| 229512_at    | 1.00 | 0.99 | PM    | 75.73  | <b>3.36</b> | 0.01 | P     | 252.40  |           |                |
| 223335_at    | 1.00 | 0.97 | P     | 248.80 | <b>3.36</b> | 0.00 | P     | 820.80  | LOC51249  | 1p34.1         |
| 218202_x_at  | 0.98 | 0.91 | P     | 276.67 | <b>3.36</b> | 0.01 | P     | 930.00  | MIRFL44   | 2q36.3         |
| 219234_x_at  | 0.97 | 0.88 | PA    | 22.40  | <b>3.35</b> | 0.00 | P     | 74.53   | SCRN3     | 2q31.1         |
| 225677_at    | 1.00 | 0.98 | P     | 215.03 | <b>3.35</b> | 0.00 | P     | 710.03  | BCAP29    | 7q22-q31       |
| 224913_s_at  | 0.99 | 0.95 | P     | 669.70 | <b>3.35</b> | 0.00 | P     | 2211.97 | TIMM50    | 19q13.2        |
| 200764_s_at  | 0.99 | 0.93 | P     | 248.03 | <b>3.35</b> | 0.00 | P     | 819.17  | CTNNA1    | 5q31           |
| 210943_x_at  | 1.00 | 0.98 | P     | 175.37 | <b>3.35</b> | 0.01 | P     | 578.70  | CHST1     | 1q42.1-q42.2   |
| 238465_at    | 1.00 | 0.96 | P     | 315.90 | <b>3.34</b> | 0.02 | P     | 1042.97 | MGC33848  | 5q11.2         |
| 210685_s_at  | 0.96 | 0.85 | P     | 80.27  | <b>3.34</b> | 0.00 | P     | 265.77  | UBE4B     | 1p36.3         |
| 202156_s_at  | 1.00 | 0.98 | PA    | 148.87 | <b>3.34</b> | 0.01 | P     | 491.87  | CUGBP2    | 10p13          |
| 210290_at    | 0.99 | 0.94 | P     | 37.60  | <b>3.34</b> | 0.01 | P     | 124.90  | ZNF174    | 16p13.3        |
| 230768_at    | 1.00 | 0.96 | PA    | 32.20  | <b>3.34</b> | 0.00 | P     | 106.07  |           |                |
| 209233_at    | 0.99 | 0.92 | P     | 425.53 | <b>3.33</b> | 0.00 | P     | 1360.00 | C2F       | 12p13          |
| 220038_at    | 0.99 | 0.94 | P     | 248.87 | <b>3.33</b> | 0.00 | P     | 819.53  | SGKL      | q12.3-q13.1    |
| 223539_s_at  | 1.00 | 0.98 | PM, A | 122.50 | <b>3.33</b> | 0.00 | P     | 402.00  | SERF1A    | 3q12.2-q13.3   |
| 219915_s_at  | 0.99 | 0.95 | A     | 40.13  | <b>3.33</b> | 0.00 | P     | 131.30  | SLC16A10  | 6q21-q22       |
| 202009_at    | 1.00 | 0.98 | P     | 102.80 | <b>3.33</b> | 0.00 | P     | 336.80  | PTK9L     | 3p21.1         |
| 1552863_s_at | 1.00 | 0.93 | A     | 103.53 | <b>3.32</b> | 0.00 | P     | 336.43  | ELK3      | 12p13.3        |
| 202797_at    | 1.00 | 0.97 | P     | 226.17 | <b>3.32</b> | 0.00 | P     | 740.03  | SACM1L    | 3p21.3         |
| 204544_at    | 0.98 | 0.90 | P     | 348.40 | <b>3.32</b> | 0.01 | P     | 1153.67 | HPS5      | 11p14          |
| 201859_at    | 0.97 | 0.89 | PA    | 32.43  | <b>3.32</b> | 0.00 | P     | 106.07  | PRG1      | 10q22.1        |
| 1564283_at   | 1.00 | 0.96 | PA    | 27.97  | <b>3.32</b> | 0.01 | P     | 92.00   | CCRNL4    | 4q26.3         |
| 225063_at    | 0.99 | 0.94 | P     | 137.70 | <b>3.32</b> | 0.00 | P     | 453.60  | UTRN      | 6q24           |
| 215599_at    | 0.99 | 0.94 | P     | 108.70 | <b>3.31</b> | 0.03 | P     | 366.13  | SMA4      | 5q13           |
| 212810_s_at  | 0.99 | 0.94 | P     | 180.43 | <b>3.31</b> | 0.01 | P     | 587.67  | SLC1A4    | 2p15-p13       |
| 226447_at    | 1.00 | 0.96 | P     | 567.73 | <b>3.31</b> | 0.00 | P     | 1852.67 | GPD2      | 2q24.1         |
| 222604_at    | 0.99 | 0.95 | P     | 97.37  | <b>3.31</b> | 0.00 | P     | 317.13  | KCTD15    | 19q13.12       |
| 227699_at    | 0.99 | 0.95 | PA    | 117.07 | <b>3.31</b> | 0.00 | P     | 381.27  | FLJ25436  | 14q23.1        |
| 1564175_at   | 0.98 | 0.91 | A     | 16.70  | <b>3.29</b> | 0.00 | P     | 54.27   |           |                |
| 202944_at    | 0.98 | 0.90 | PA    | 86.50  | <b>3.29</b> | 0.00 | P     | 281.97  | NAGA      | 22q11          |
| 209208_at    | 0.99 | 0.94 | A     | 225.23 | <b>3.29</b> | 0.00 | P     | 734.50  | MPDU1     | 17p13.1-p12    |
| 202472_at    | 1.00 | 0.97 | A     | 54.27  | <b>3.29</b> | 0.00 | P     | 176.10  | MPI       | 15q22-qter     |
| 1559221_at   | 0.98 | 0.91 | A     | 131.07 | <b>3.29</b> | 0.00 | PM    | 42.13   |           |                |
| 226440_at    | 0.99 | 0.94 | P     | 240.00 | <b>3.29</b> | 0.00 | P     | 778.43  | DUSP22    | 6p25.3         |
| 226854_at    | 1.00 | 0.97 | A     | 35.13  | <b>3.29</b> | 0.00 | P, MA | 114.70  | GTPBP5    | 20q13.33       |
| 205308_at    | 1.00 | 0.99 | A     | 38.37  | <b>3.29</b> | 0.00 | P     | 124.40  | CGI-62    | 8q21.11        |
| 156442_at    | 0.99 | 0.94 | A     | 347.33 | <b>3.29</b> | 0.00 | PM    | 1123.73 | VMD2      | 11q13          |
| 238634_at    | 1.00 | 0.95 | P     | 155.67 | <b>3.29</b> | 0.02 | P     | 51.77   | FLJ25402  | 8q22           |
| 214488_at    | 0.97 | 0.89 | A     | 9.50   | <b>3.29</b> | 0.01 | P     | 31.30   | RAP2B     | 3q25.2         |
| 239780_at    | 1.00 | 0.97 | PA    | 17.20  | <b>3.28</b> | 0.02 | P     | 56.73   |           |                |
| 200868_s_at  | 0.99 | 0.94 | P     | 341.00 | <b>3.28</b> | 0.00 | P     | 1105.30 | ZNF313    | 20q13.13       |
| 241838_at    | 1.00 | 0.95 | P     | 58.63  | <b>3.27</b> | 0.00 | P     | 188.43  |           |                |
| 241435_at    | 0.99 | 0.93 | P     | 52.67  | <b>3.27</b> | 0.01 | P     | 105.91  |           |                |
| 202914_s_at  | 1.00 | 0.96 | PA    | 59.07  | <b>3.27</b> | 0.00 | P     | 191.60  | ARHGEF11  | 1q21           |
| 223518_at    | 1.00 | 0.96 | P     | 204.77 | <b>3.27</b> | 0.00 | P     | 658.23  | DFFA      | 1p36.3-p36.2   |
| 235554_x_at  | 0.99 | 0.92 | P     | 70.17  | <b>3.27</b> | 0.00 | P     | 226.50  | MGC29898  | 4p15.32        |
| 215073_x_at  | 0.98 | 0.90 | P     | 58.30  | <b>3.27</b> | 0.00 | P     | 188.30  | NR2F2     | 15q26          |
| 202089_s_at  | 1.00 | 0.96 | P     | 308.57 | <b>3.26</b> | 0.00 | P     | 1165.00 | SLC39A6   | 19q12.2        |
| 201226_at    | 1.00 | 0.97 | P     | 522.50 | <b>3.26</b> | 0.00 | P     | 1676.27 | NDUFB8    | 1q23.2-q23.33  |
| 219325_s_at  | 0.96 | 0.85 | A     | 7.53   | <b>3.26</b> | 0.03 | P     | 25.47   | ELAC1     | 18q21          |
| 219131_at    | 0.99 | 0.93 | PA    | 69.20  | <b>3.26</b> | 0.00 | P     | 221.73  | TERE1     | 1pter          |
| 229111_at    | 1.00 | 0.96 | A     | 37.33  | <b>3.26</b> | 0.00 | P     | 119.53  | MASPD2    | 1p36.3-p36.2   |
| 211613_s_at  | 1.00 | 0.95 | A     | 32.70  | <b>3.26</b> | 0.00 | P     | 105.58  | GPD2      | 11q12.2        |
| 226775_at    | 0.99 | 0.95 | P     | 60.33  | <b>3.26</b> | 0.00 | P     | 193.67  | e(y)2     | 8q23.2         |
| 241804_at    | 1.00 | 0.96 | P     | 21.37  | <b>3.26</b> | 0.01 | P     | 69.33   |           |                |
| 201719_s_at  | 1.00 | 0.97 | PM    | 88.90  | <b>3.25</b> | 0.00 | P     | 285.17  | EPB41L2   | 6q23           |
| 244181_at    | 0.97 | 0.88 | PM    | 14.90  | <b>3.25</b> | 0.02 | P     | 46.70   |           |                |
| 229007_at    | 0.99 | 0.94 | P     | 98.13  | <b>3.25</b> | 0.01 | P     | 276.07  | C6orf204  | 6q22           |
| 208319_s_at  | 0.99 | 0.94 | P     | 808.43 | <b>3.25</b> | 0.00 | P     | 2592.53 | RBM3      | xp11.2         |
| 1553299_at   | 0.99 | 0.94 | PA    | 9.87   | <b>3.24</b> | 0.00 | P     | 31.47   |           |                |
| 200615_s_at  | 1.00 | 0.98 | A     | 119.83 | <b>3.24</b> | 0.00 | P     | 383.60  | AP2B1     | 17q11.2-q12    |
| 203410_at    | 1.00 | 0.96 | A     | 195.97 | <b>3.24</b> | 0.00 | P     | 627.17  | AP3M2     | 8p11.2         |
| 238427_at    | 0.99 | 0.93 | MA    | 29.80  | <b>3.24</b> | 0.00 | P     | 96.13   | GRPEL2    | 5q33.1         |
| 1554670_at   | 0.99 | 0.93 | P     | 97.33  | <b>3.24</b> | 0.01 | P     | 314.20  | GGA1      | 22q13.31       |
| 217790_s_at  | 1.00 | 0.99 | P     | 157.20 | <b>3.23</b> | 0.00 | P     | 500.73  | SSR3      | 3q25.31        |
| 204209_at    | 1.00 | 0.97 | PA    | 103.80 | <b>3.23</b> | 0.00 | P     | 331.83  |           |                |
| 221042_s_at  | 0.99 | 0.94 | P     | 89.60  | <b>3.23</b> | 0.00 | P     | 285.67  | CLMN      | 14q32.2        |
| 234431_at    | 0.99 | 0.93 | A     | 42.53  | <b>3.23</b> | 0.01 | PM    | 136.07  | GSN       | 9q33           |
| 223785_at    | 1.00 | 0.98 | P     | 164.13 | <b>3.23</b> | 0.00 | P     | 523.27  | FLJ10719  | 15q25-q26      |
| 210844_x_at  | 1.00 | 0.98 | P     | 432.07 | <b>3.22</b> | 0.00 | P     | 1369.13 | CTNNA1    | 5q31           |
| 238811_at    | 0.97 | 0.88 | A     | 15.73  | <b>3.22</b> | 0.00 | P     | 50.03   | ATP11B    | 3q27           |
| 216683_at    | 0.98 | 0.90 | PA    | 20.00  | <b>3.21</b> | 0.00 | P     | 63.13   |           |                |
| 41544_at     | 0.98 | 0.89 | P     | 287.87 | <b>3.21</b> | 0.00 | P     | 904.80  | SASH1     | 6q24.3         |
| 1558305_at   | 0.97 | 0.87 | PA    | 27.73  | <b>3.21</b> | 0.02 | P</   |         |           |                |

|              |      |      |       |         |      |      |      |         |                      |               |
|--------------|------|------|-------|---------|------|------|------|---------|----------------------|---------------|
| 207147_at    | 0.99 | 0.94 | A     | 77.00   | 3.18 | 0.00 | P    | 241.70  | DLX2                 | 2q32          |
| 223927_at    | 0.97 | 0.88 | A     | 13.87   | 3.18 | 0.01 | PA   | 43.87   | PCDH89               | 5q31          |
| 1565361_s_at | 1.00 | 0.98 | PM    | 21.00   | 3.18 | 0.00 | P    | 65.73   | FZP566D13p32.3-p31.3 |               |
| 208624_s_at  | 0.98 | 0.91 | P     | 224.63  | 3.18 | 0.00 | P    | 708.37  | EIF4G1               | 3q27-qter     |
| 212085_at    | 1.00 | 0.95 | P     | 1164.13 | 3.18 | 0.00 | P    | 3650.63 | SLC25A6              | 22.32 and vp  |
| 1561017_at   | 0.99 | 0.94 | P     | 38.40   | 3.17 | 0.00 | P    | 120.03  |                      |               |
| 218258_at    | 1.00 | 0.99 | P     | 707.70  | 3.17 | 0.00 | P    | 2207.80 | POLR1D               | 13q12.2       |
| 227563_at    | 1.00 | 0.95 | P     | 46.10   | 3.17 | 0.01 | P    | 144.83  | MGC42630             | 9q21.12       |
| 222826_at    | 0.97 | 0.97 | P     | 65.97   | 3.17 | 0.00 | P    | 207.03  |                      |               |
| 226362_at    | 0.98 | 0.91 | A     | 56.30   | 3.17 | 0.00 | P,MA | 177.53  |                      | 5q13.1        |
| 208361_s_at  | 1.00 | 0.95 | M,A   | 67.37   | 3.17 | 0.00 | P    | 210.30  | POLR3D               | 8q21          |
| 242188_at    | 0.99 | 0.95 | P     | 34.17   | 3.16 | 0.01 | P    | 107.67  |                      |               |
| 157197_s_at  | 0.98 | 0.90 | P     | 43.83   | 3.16 | 0.04 | P    | 141.30  | LGALS3               | 14q21-q22     |
| 235126_at    | 0.99 | 0.93 | A     | 53.80   | 3.16 | 0.00 | P    | 167.33  |                      |               |
| 221056_x_at  | 0.99 | 0.91 | A     | 77.27   | 3.16 | 0.00 | P    | 240.87  | EPS15L1              | 19p13.12      |
| 1553322_s_at | 0.97 | 0.89 | P,A   | 20.43   | 3.16 | 0.01 | P    | 65.07   | TEAD1                | 11p15.4       |
| 1555388_s_at | 0.99 | 0.94 | M,A   | 24.00   | 3.16 | 0.00 | P    | 74.30   | SNX25                | 4q35.1        |
| 239405_at    | 0.98 | 0.90 | A     | 55.57   | 3.16 | 0.00 | P    | 173.80  |                      |               |
| 227283_at    | 1.00 | 0.96 | A     | 43.40   | 3.16 | 0.01 | PA   | 138.20  |                      |               |
| 218298_s_at  | 1.00 | 0.98 | P,M,A | 63.60   | 3.15 | 0.00 | P    | 197.70  | C14orf159            | 14q32.12      |
| 201392_s_at  | 0.99 | 0.94 | P     | 204.07  | 3.15 | 0.00 | P    | 631.00  | IGF2R                | 6q26          |
| 219099_at    | 1.00 | 0.95 | P     | 414.87  | 3.15 | 0.00 | P    | 1288.53 | C12orf5              | 12p13.3       |
| 222701_s_at  | 1.00 | 0.98 | P     | 129.93  | 3.14 | 0.00 | P    | 401.47  | CHCHD7               | 8q11.23       |
| 242260_at    | 1.00 | 0.96 | P     | 303.10  | 3.14 | 0.00 | P    | 939.27  | MATR3                | 5q31.3        |
| 213900_at    | 0.98 | 0.89 | P,M,A | 64.00   | 3.14 | 0.00 | P    | 198.70  | C9orf81              | 9q13-q21      |
| 223304_at    | 1.00 | 0.96 | P     | 221.50  | 3.14 | 0.00 | P    | 686.47  | SLC37A3              | 7q34          |
| 212345_s_at  | 1.00 | 0.99 | P     | 487.57  | 3.14 | 0.00 | P    | 1507.83 | CREB3L2              | 7q34          |
| 210605_s_at  | 0.99 | 0.94 | M,A   | 153.23  | 3.14 | 0.02 | P    | 483.10  | MFG8                 | 15q25         |
| 244487_08    | 0.99 | 0.90 | P     | 139.07  | 3.14 | 0.00 | P    | 114.53  |                      |               |
| 242652_at    | 1.00 | 0.99 | A     | 32.30   | 3.14 | 0.01 | P    | 100.40  |                      |               |
| 226460_at    | 0.99 | 0.94 | P     | 190.63  | 3.14 | 0.00 | P    | 588.67  | KIAA1450             | 4q32.1        |
| 242390_at    | 0.96 | 0.86 | P,A   | 47.80   | 3.14 | 0.02 | P    | 149.07  |                      |               |
| 154835_s_at  | 0.99 | 0.93 | A     | 27.37   | 3.13 | 0.00 | PM   | 84.97   | B3GNT5               | 3q28          |
| 217859_s_at  | 0.97 | 0.89 | P     | 54.83   | 3.13 | 0.00 | P    | 108.27  | SLC39A9              | 14q24.1       |
| 235198_at    | 1.00 | 0.96 | P     | 259.50  | 3.13 | 0.00 | P    | 800.97  |                      |               |
| 223707_at    | 1.00 | 0.96 | P     | 79.40   | 3.13 | 0.00 | P    | 244.40  | MGC10850             | 11            |
| 243529_at    | 0.99 | 0.92 | P     | 95.83   | 3.13 | 0.00 | P    | 298.67  | MetRS                | 2q33.1        |
| 203432_at    | 0.99 | 0.92 | P     | 515.07  | 3.13 | 0.00 | P    | 1593.97 | TMPO                 | 12q22         |
| 201040_at    | 1.00 | 0.99 | P,A   | 159.27  | 3.13 | 0.00 | P    | 431.41  | GNAI2                | 9p21          |
| 208358_s_at  | 0.98 | 0.89 | P,A   | 60.37   | 3.13 | 0.00 | P    | 186.97  | UGT8                 | 4q26          |
| 229483_at    | 0.99 | 0.95 | P     | 41.30   | 3.13 | 0.01 | P    | 128.13  |                      |               |
| 206256_at    | 1.00 | 0.95 | P,A   | 52.90   | 3.12 | 0.00 | P    | 162.43  | CPN1                 | 10q24.31      |
| 202596_s_at  | 0.98 | 0.91 | P,A   | 97.17   | 3.12 | 0.00 | P    | 300.37  | SVIL                 | 10p11.2       |
| 232197_s_at  | 0.99 | 0.94 | P     | 57.83   | 3.12 | 0.00 | P    | 170.53  | ARSB                 | 5p11-q13      |
| 213627_at    | 0.98 | 0.91 | A     | 167.37  | 3.12 | 0.00 | P    | 515.17  | MAGED2               | xp11.2        |
| 221834_at    | 1.00 | 0.97 | P     | 108.97  | 3.12 | 0.01 | P    | 335.27  | LONP                 | 16q12.1       |
| 154310_a_at  | 0.98 | 0.89 | P,A   | 19.83   | 3.12 | 0.00 | P    | 60.67   | EIF4G3               | 1p36.12       |
| 218640_s_at  | 0.99 | 0.92 | P     | 278.10  | 3.11 | 0.00 | P    | 854.40  | FLEKHF2              | 8q22.1        |
| 218155_s_at  | 0.99 | 0.92 | P     | 572.70  | 3.11 | 0.00 | P    | 1575.03 | FLJ10534             | 17p13.3       |
| 225674_at    | 0.97 | 0.89 | P     | 417.63  | 3.11 | 0.00 | P    | 1285.30 | BCAP29               | 7q22-q31      |
| 201666_at    | 1.00 | 0.98 | P     | 530.40  | 3.11 | 0.01 | P    | 1642.03 | TIMP1                | p11.3-p11.23  |
| 238227_at    | 0.98 | 0.90 | P,A   | 46.47   | 3.11 | 0.00 | P    | 142.27  |                      |               |
| 203005_at    | 0.98 | 0.90 | P     | 180.17  | 3.11 | 0.00 | P    | 551.03  | LTR                  | 12p13         |
| 225329_at    | 1.00 | 0.96 | P     | 111.60  | 3.11 | 0.01 | P    | 341.83  | LOC348262            | 17            |
| 207624_s_at  | 1.00 | 0.97 | P,M   | 36.97   | 3.10 | 0.00 | P    | 112.93  | RPR                  | xp11.4        |
| 227161_at    | 0.99 | 0.92 | P     | 96.43   | 3.10 | 0.00 | P    | 295.97  | C7orf3               | 7q36.3        |
| 225028_at    | 0.99 | 0.94 | P     | 33.00   | 3.10 | 0.00 | P    | 101.30  |                      | Xp11.22       |
| 208185_s_at  | 0.99 | 0.94 | A     | 11.53   | 3.10 | 0.02 | PA   | 35.57   |                      |               |
| 240759_at    | 0.99 | 0.95 | P,A   | 18.20   | 3.10 | 0.00 | P    | 56.30   |                      |               |
| 206473_at    | 0.99 | 0.92 | A     | 48.77   | 3.10 | 0.00 | P    | 150.47  | MBTFS2               | q22.1-q22.2   |
| 235144_at    | 0.99 | 0.94 | P     | 371.57  | 3.10 | 0.00 | P    | 1138.93 | FLJ31614             | 9q21.33       |
| 201393_s_at  | 0.99 | 0.93 | P     | 420.33  | 3.09 | 0.00 | P    | 1285.00 | IGF2R                | 6q26          |
| 240757_at    | 0.98 | 0.90 | P     | 9.60    | 3.09 | 0.01 | P    | 29.60   | CLASP1               | 2q14.2-q14.3  |
| 212719_at    | 1.00 | 0.96 | P     | 108.57  | 3.09 | 0.00 | P    | 330.90  | FLEKHE1              | 18q21.33      |
| 243287_s_at  | 1.00 | 0.97 | P,M   | 55.70   | 3.09 | 0.00 | P    | 169.83  |                      |               |
| 214552_s_at  | 0.97 | 0.88 | P     | 50.77   | 3.09 | 0.00 | P    | 155.37  | RABEP1               | 17p13.3       |
| 215286_s_at  | 1.00 | 0.97 | M,A   | 45.63   | 3.09 | 0.01 | P    | 140.67  | PHTF2                | 7q11.23-q21   |
| 214850_at    | 1.00 | 0.98 | P,A   | 35.97   | 3.09 | 0.00 | P    | 108.47  | SMAS                 | 5q13          |
| 221535_s_at  | 1.00 | 0.97 | P     | 201.50  | 3.09 | 0.01 | P    | 611.97  | FLJ11301             | 3q29          |
| 238654_at    | 0.99 | 0.93 | A     | 62.13   | 3.08 | 0.00 | P    | 189.57  | LOC147645            | 19q13.41      |
| 207543_s_at  | 0.98 | 0.90 | P,A   | 180.20  | 3.08 | 0.00 | P    | 543.93  | P4HA1                | 0q21.3-q23.1  |
| 226974_at    | 1.00 | 0.98 | P     | 62.03   | 3.08 | 0.00 | P    | 188.57  |                      |               |
| 214681_at    | 0.99 | 0.93 | A     | 50.07   | 3.08 | 0.02 | P    | 154.30  | GK                   | xp21.3        |
| 225917_at    | 1.00 | 0.97 | P     | 52.37   | 3.08 | 0.00 | P    | 160.90  | ATF7IP               | 12p13.2       |
| 200696_s_at  | 0.99 | 0.92 | P     | 711.77  | 3.08 | 0.00 | P    | 2165.27 | GSN                  | 9q33          |
| 226776_at    | 0.98 | 0.90 | P,A   | 20.77   | 3.08 | 0.00 | P    | 62.77   | e(y)2                | 8q23.2        |
| 243487_at    | 0.99 | 0.92 | P,A   | 39.83   | 3.08 | 0.01 | P    | 122.23  | AF5Q31               | 5q31          |
| 156598_at    | 1.00 | 0.98 | P     | 116.87  | 3.08 | 0.00 | P    | 354.47  | LOC283687            | 15q24.3       |
| 235967_at    | 0.99 | 0.92 | A     | 38.07   | 3.08 | 0.00 | P    | 115.70  |                      |               |
| 224702_at    | 1.00 | 0.95 | P     | 472.83  | 3.08 | 0.00 | P    | 1437.00 | MGC23909             | 5q14.2        |
| 231234_at    | 0.99 | 0.93 | P     | 32.97   | 3.08 | 0.01 | P    | 100.07  | CTSC                 | 1q14.1-q14.3  |
| 200903_s_at  | 0.99 | 0.94 | P     | 992.70  | 3.08 | 0.00 | P    | 3022.53 | AHCY                 | 20cen-q13.1   |
| 227871_at    | 1.00 | 0.97 | P     | 226.47  | 3.07 | 0.00 | P    | 686.97  | FLJ38664             | xq21.2        |
| 233518_at    | 0.98 | 0.89 | P     | 30.97   | 3.07 | 0.00 | P    | 93.73   |                      |               |
| 215483_at    | 1.00 | 0.95 | P     | 31.70   | 3.07 | 0.02 | P    | 97.07   | AKAP9                | 7q21-q22      |
| 207630_s_at  | 1.00 | 0.98 | P     | 94.20   | 3.07 | 0.00 | P    | 284.90  | CREM                 | 10p11.21      |
| 218741_at    | 0.99 | 0.93 | P     | 284.70  | 3.07 | 0.00 | P    | 856.00  | C22orf18             | 22q13.31      |
| 244523_at    | 1.00 | 0.97 | M,A   | 48.23   | 3.07 | 0.00 | P    | 145.97  | IMD                  | 17q21         |
| 212250_at    | 0.99 | 0.94 | P     | 638.87  | 3.07 | 0.00 | P    | 1934.00 | LYRIC                | 8q24.1        |
| 205281_s_at  | 1.00 | 0.96 | P     | 139.37  | 3.07 | 0.00 | P    | 421.37  | PIGA                 | xp22.1        |
| 206566_at    | 0.99 | 0.92 | M,A   | 25.27   | 3.07 | 0.02 | P    | 78.80   | SLC7A1               | 13q12-q14     |
| 244008_at    | 0.97 | 0.89 | A     | 29.13   | 3.07 | 0.00 | PM   | 87.67   |                      |               |
| 201096_s_at  | 0.99 | 0.92 | P     | 912.93  | 3.07 | 0.00 | P    | 2766.30 | ARF4                 | 3p21.2-p21.1  |
| 210860_s_at  | 0.98 | 0.91 | P     | 737.67  | 3.07 | 0.00 | P    | 2235.07 | ASAH1                | 8p23-q13.3    |
| 211960_s_at  | 1.00 | 0.95 | P     | 855.27  | 3.07 | 0.00 | P    | 2584.87 | RAB7                 | 3q21.3        |
| 243361_at    | 0.97 | 0.88 | A     | 31.40   | 3.06 | 0.02 | PM   | 97.10   |                      |               |
| 1563614_at   | 0.99 | 0.93 | A     | 14.30   | 3.06 | 0.00 | P    | 43.10   | MTBP                 | 8q24.12       |
| 228563_at    | 0.98 | 0.90 | A     | 90.03   | 3.06 | 0.00 | P    | 272.33  | GJA7                 | 17q21.31      |
| 219083_at    | 1.00 | 0.97 | M,A   | 333.27  | 3.06 | 0.00 | P    | 1004.07 | FLJ10539             | 3p14.2        |
| 201009_s_at  | 1.00 | 0.99 | A     | 81.33   | 3.06 | 0.00 | PA   | 244.27  | TXNIP                | 1q21.2        |
| 237664_at    | 0.98 | 0.90 | P     | 25.83   | 3.05 | 0.00 | P    | 77.47   |                      |               |
| 204330_s_at  | 0.98 | 0.91 | P     | 41.60   | 3.05 | 0.01 | P    | 126.13  | MRPS12               | 9q13.1-q13.2  |
| 213018_at    | 0.98 | 0.91 | P     | 87.40   | 3.05 | 0.00 | P    | 263.53  | ODAG                 | 7q21-q22      |
| 217749_at    | 1.00 | 0.95 | P     | 212.60  | 3.05 | 0.00 | P    | 636.53  | COPG                 | 3q21.3        |
| 226837_at    | 1.00 | 0.95 | P     | 173.30  | 3.05 | 0.00 | P    | 521.47  | SPRED1               | 15q13.3       |
| 242577_at    | 0.99 | 0.92 | P,A   | 11.47   | 3.05 | 0.00 | P    | 34.67   |                      |               |
| 238069_at    | 1.00 | 0.96 | P,M   | 56.07   | 3.04 | 0.00 | P    | 168.47  | USP45                | 6q16.3        |
| 230071_at    | 0.99 | 0.94 | A     | 33.57   | 3.04 | 0.00 | P    | 100.97  | FLJ10849             | 4q21.22       |
| 224733_at    | 1.00 | 0.99 | P     | 102.53  | 3.04 | 0.00 | P    | 306.60  | CKLF3F3              | 16q22.1       |
| 215308_at    | 0.99 | 0.94 | A     | 24.83   | 3.04 | 0.00 | P    | 73.90   | G22P1                | 2q13.2-q13.31 |
| 211373_s_at  | 0.98 | 0.91 | A     | 52.17   | 3.04 | 0.00 | P    | 155.33  | PSEN2                | 1q31-q42      |
| 203011_at    | 0.99 | 0.93 | P     | 420.80  | 3.04 | 0.00 | P    | 1260.83 | IMPA1                | q21.13-q21.3  |
| 1562955_at   | 0.99 | 0.92 | P,A   | 32.43   | 3.03 | 0.00 | P    | 97.27   |                      |               |
| 1559060_a_at | 0.99 | 0.92 | P     | 27.47   | 3.03 | 0.01 | P    | 82.30   | RAPGEF6              | 5q31.1        |
| 229354_at    | 1.00 | 0.96 | P     | 56.17   | 3.03 | 0.00 | P    | 167.60  | AHRH                 | 5p15.3        |
| 217043_s_at  | 0.99 | 0.94 | P     | 225.20  | 3.03 | 0.00 | P    | 672.23  | MFN1                 | 3q27.1        |
| 1552695_a_at | 0.99 | 0.92 | A     | 43.47   | 3.03 | 0.00 | PM   | 129.60  | SLC2A13              | 12q12         |
| 236962_at    | 0.99 | 0.93 | A     | 27.00   | 3.02 | 0.00 | PM   | 80.17   |                      |               |
| 203235_at    | 0.98 | 0.91 | A     | 94.53   | 3.02 | 0.00 | P    | 282.53  | SLC23A2              | 20p13         |
| 1555910_at   | 0.99 | 0.93 | P     | 88.53   | 3.02 | 0.00 | P    | 263.73  | PTCD2                | 5q13.2</      |

|              |      |      |    |        |             |      |     |         |           |               |
|--------------|------|------|----|--------|-------------|------|-----|---------|-----------|---------------|
| 221264_s_at  | 1.00 | 0.97 | P  | 126.37 | <b>3.00</b> | 0.01 | P   | 375.40  | TARDBP    | 1p36.22       |
| 201028_s_at  | 0.99 | 0.93 | P  | 307.73 | <b>3.00</b> | 0.00 | P   | 912.43  | CD99      | .22:32;vp11.3 |
| 221911_at    | 1.00 | 0.98 | P  | 83.40  | <b>3.00</b> | 0.00 | P   | 246.40  | LOC22181c | 7p21.3        |
| 225875_s_at  | 0.99 | 0.93 | P  | 104.00 | <b>3.00</b> | 0.01 | P   | 310.30  | DJAG0203  | 23:26-p35.1   |
| 215792_s_at  | 0.99 | 0.95 | P  | 244.90 | <b>3.00</b> | 0.00 | P   | 721.00  | FLJ10737  | 1p36.23       |
| 221539_at    | 0.98 | 0.91 | P  | 611.73 | <b>3.00</b> | 0.00 | P   | 1815.47 | EIF4EBP1  | 8p12          |
| 216933_x_at  | 1.00 | 0.96 | PA | 28.53  | <b>2.99</b> | 0.01 | P   | 85.17   | APC       | 5q21-q22      |
| 227627_at    | 1.00 | 0.95 | P  | 186.63 | <b>2.99</b> | 0.00 | P   | 551.60  | SGKL      | q12.3-q13.1   |
| 235295_at    | 0.99 | 0.92 | P  | 138.37 | <b>2.99</b> | 0.00 | P   | 408.57  | PANK1     | 11q21         |
| 227237_x_at  | 0.98 | 0.90 | P  | 144.07 | <b>2.99</b> | 0.00 | P   | 421.70  | ATAD3A    | 1p36.33       |
| 156969_at    | 0.98 | 0.91 | PA | 12.67  | <b>2.99</b> | 0.01 | P   | 37.70   | MGC21658  | xp11.22       |
| 237116_at    | 0.97 | 0.88 | PA | 18.10  | <b>2.99</b> | 0.01 | P   | 53.97   | PFN2      | 3q25.1-q25.2  |
| 212561_at    | 1.00 | 0.98 | P  | 163.60 | <b>2.99</b> | 0.00 | P   | 481.20  | RAB9P1    | 11p15.3       |
| 209863_at    | 0.99 | 0.93 | PA | 48.87  | <b>2.99</b> | 0.00 | P   | 143.10  | C1orf17   | 1q25          |
| 212178_s_at  | 0.98 | 0.89 | P  | 414.53 | <b>2.99</b> | 0.00 | P   | 1223.93 | POM121    | 7q11.23       |
| 225343_at    | 1.00 | 0.96 | P  | 419.27 | <b>2.98</b> | 0.00 | P   | 1227.93 | LOC283578 | 14q24.3       |
| 200831_s_at  | 0.99 | 0.92 | PA | 294.73 | <b>2.98</b> | 0.00 | P   | 871.10  | SCD       | 10q23-q24     |
| 241893_at    | 0.99 | 0.94 | MA | 11.03  | <b>2.98</b> | 0.01 | P   | 32.97   |           |               |
| 204807_at    | 0.99 | 0.95 | P  | 110.43 | <b>2.97</b> | 0.00 | P   | 324.57  |           |               |
| 235213_at    | 0.99 | 0.91 | A  | 29.53  | <b>2.97</b> | 0.02 | P   | 87.33   | ITPKB     | 1q42.13       |
| 204261_s_at  | 1.00 | 0.96 | A  | 16.30  | <b>2.97</b> | 0.00 | P   | 47.80   | PSEN2     | 1q31-q42      |
| 222654_at    | 0.99 | 0.95 | P  | 301.40 | <b>2.97</b> | 0.00 | P   | 883.73  | FLJ20421  | 8q11.23       |
| 222834_s_at  | 0.97 | 0.88 | P  | 261.37 | <b>2.97</b> | 0.00 | P   | 759.80  | GNGL2     | 1p31.2        |
| 219865_at    | 1.00 | 0.98 | A  | 59.83  | <b>2.97</b> | 0.01 | P   | 175.57  | HSPC157   | 1p36.12       |
| 228076_s_at  | 0.99 | 0.92 | PA | 34.07  | <b>2.97</b> | 0.02 | P   | 103.43  | NOL6      | 9p13.3        |
| 221563_at    | 0.99 | 0.92 | P  | 89.07  | <b>2.97</b> | 0.00 | P   | 259.57  | DUSP10    | 17q41         |
| 200604_s_at  | 0.97 | 0.89 | P  | 263.83 | <b>2.97</b> | 0.00 | P   | 778.50  | PRKAR1A   | 17q23-q24     |
| 203282_at    | 0.99 | 0.94 | P  | 617.93 | <b>2.97</b> | 0.00 | P   | 1810.13 | GBE1      | 3p12.3        |
| 228717_at    | 0.98 | 0.92 | P  | 47.40  | <b>2.97</b> | 0.00 | P   | 139.97  |           |               |
| 212904_at    | 0.99 | 0.93 | P  | 597.83 | <b>2.96</b> | 0.00 | P   | 1736.73 | KIAA1185  | 1p36.32       |
| 223457_at    | 1.00 | 0.97 | P  | 91.40  | <b>2.96</b> | 0.00 | P   | 266.30  | COPG2     | 7q32          |
| 209414_at    | 0.96 | 0.86 | A  | 20.27  | <b>2.96</b> | 0.02 | P   | 60.53   | FZR1      | 19p13.3       |
| 202134_s_at  | 1.00 | 1.00 | A  | 294.77 | <b>2.96</b> | 0.01 | P   | 872.90  | TAZ       | 3q23-q24      |
| 201541_s_at  | 0.99 | 0.93 | P  | 231.90 | <b>2.96</b> | 0.00 | P   | 683.33  | ZNHIT1    | 10q26.1       |
| 221961_at    | 0.99 | 0.94 | A  | 26.87  | <b>2.95</b> | 0.01 | P   | 78.97   | CLCN7     | 16p13         |
| 223282_at    | 1.00 | 0.96 | MA | 60.40  | <b>2.95</b> | 0.00 | P   | 174.90  | SDCCAG33  | 18q22.3       |
| 201380_at    | 1.00 | 0.97 | P  | 301.07 | <b>2.95</b> | 0.00 | P   | 874.17  | CRTAP     | 3p22          |
| 202519_at    | 1.00 | 0.95 | P  | 159.47 | <b>2.95</b> | 0.01 | P   | 463.43  | MONDOA    | 12q21.31      |
| 202422_s_at  | 0.99 | 0.94 | P  | 188.87 | <b>2.95</b> | 0.00 | P   | 525.95  | ACSL4     | q22.3-q23     |
| 223319_at    | 1.00 | 0.97 | A  | 102.13 | <b>2.95</b> | 0.00 | P   | 295.87  | GPHN      | 4q23.3-q24.1  |
| 212835_at    | 0.99 | 0.94 | PA | 105.70 | <b>2.95</b> | 0.00 | P   | 307.50  | KIAA0157  | 10q26.2       |
| 1565681_s_at | 0.99 | 0.94 | PA | 81.63  | <b>2.95</b> | 0.00 | P   | 237.10  | KIAA0934  | 10p15.3       |
| 215698_at    | 0.99 | 0.92 | P  | 86.50  | <b>2.95</b> | 0.00 | P   | 251.67  | JARID1A   | 12p11         |
| 222402_at    | 0.99 | 0.92 | PA | 168.63 | <b>2.95</b> | 0.00 | P   | 490.13  | C13orf12  | 13q12.3       |
| 202638_s_at  | 0.99 | 0.94 | P  | 217.47 | <b>2.94</b> | 0.00 | P   | 631.07  | ICAM1     | 9p13.3-p13.2  |
| 236526_x_at  | 0.99 | 0.94 | P  | 60.33  | <b>2.94</b> | 0.01 | P   | 176.20  | FLJ13611  | 5q12.3        |
| 230972_at    | 1.00 | 0.99 | P  | 220.90 | <b>2.94</b> | 0.00 | P   | 639.37  | ANKRD9    | 14q32.33      |
| 242996_at    | 1.00 | 0.97 | A  | 33.10  | <b>2.94</b> | 0.00 | P   | 96.30   | MTRF1     | 3q14.1-q14.3  |
| 203335_at    | 1.00 | 1.00 | P  | 210.90 | <b>2.94</b> | 0.00 | P   | 609.13  | PHYH      | 10p16.1       |
| 210788_s_at  | 1.00 | 0.95 | P  | 293.60 | <b>2.94</b> | 0.00 | P   | 849.97  | DHRS7     | 14q23.1       |
| 229338_at    | 0.99 | 0.94 | PA | 44.73  | <b>2.93</b> | 0.01 | P   | 130.67  | SR140     | 3q23          |
| 203627_at    | 1.00 | 0.98 | P  | 107.13 | <b>2.93</b> | 0.00 | P   | 309.53  | IGF1R     | 15q26.3       |
| 231277_x_at  | 0.99 | 0.94 | A  | 80.30  | <b>2.93</b> | 0.00 | P   | 231.83  | FLJ39977  | 5q21.1        |
| 241753_at    | 0.99 | 0.92 | PA | 504.47 | <b>2.93</b> | 0.00 | P   | 67.97   | MGC33382  | 18q21.2       |
| 240588_at    | 0.99 | 0.94 | A  | 22.73  | <b>2.93</b> | 0.02 | PA  | 66.37   |           |               |
| 202929_s_at  | 1.00 | 0.96 | P  | 546.20 | <b>2.93</b> | 0.00 | P   | 1575.00 | DDT       | 22q11.23      |
| 241836_x_at  | 0.99 | 0.94 | PA | 70.20  | <b>2.93</b> | 0.00 | P   | 201.53  | FLJ23047  | 3q12.3        |
| 229474_at    | 1.00 | 0.98 | PA | 42.63  | <b>2.92</b> | 0.00 | P   | 122.67  | MICAL3    | 22q11.21      |
| 205868_s_at  | 1.00 | 0.98 | A  | 25.23  | <b>2.92</b> | 0.00 | P   | 65.23   | PTPN11    | 12q24         |
| 217949_s_at  | 1.00 | 0.99 | P  | 531.33 | <b>2.92</b> | 0.00 | P   | 1526.00 | VKORC1    | 16p11.2       |
| 209582_s_at  | 0.99 | 0.93 | A  | 23.73  | <b>2.92</b> | 0.00 | PA  | 68.17   | MOX2      | 3q12-q13      |
| 235407_at    | 1.00 | 0.96 | PA | 65.90  | <b>2.92</b> | 0.00 | P   | 188.90  | RABGEF1   | 7q11.21       |
| 208915_at    | 0.99 | 0.93 | MA | 145.37 | <b>2.92</b> | 0.01 | P   | 427.53  | GGA2      | 16p12         |
| 230663_at    | 0.98 | 0.90 | MA | 85.27  | <b>2.92</b> | 0.02 | P   | 85.90   | FMNL2     | 2q24.1        |
| 1555783_x_at | 1.00 | 0.96 | A  | 76.17  | <b>2.92</b> | 0.00 | P   | 219.53  | POLC2     | 1p36.13       |
| 232674_at    | 0.98 | 0.89 | A  | 17.03  | <b>2.92</b> | 0.00 | PMA | 48.77   | UCN2      | 3p21.3        |
| 214543_x_at  | 0.99 | 0.94 | PA | 135.57 | <b>2.91</b> | 0.00 | P   | 391.37  | QKI       | 6q26-27       |
| 236503_at    | 0.98 | 0.90 | PA | 30.40  | <b>2.91</b> | 0.01 | P   | 86.93   |           |               |
| 228841_at    | 1.00 | 0.97 | P  | 288.03 | <b>2.91</b> | 0.00 | P   | 770.67  | LOC90624  | 5q31.1        |
| 235114_x_at  | 0.99 | 0.94 | PM | 77.00  | <b>2.91</b> | 0.01 | P   | 223.17  | HOOK3     | 8p11.21       |
| 222841_s_at  | 0.99 | 0.92 | P  | 163.53 | <b>2.91</b> | 0.00 | P   | 468.97  | TIMM22    | 17p13         |
| 234926_s_at  | 1.00 | 0.96 | P  | 834.97 | <b>2.91</b> | 0.00 | P   | 2388.17 | C20orf43  | 20q13.31      |
| 1553118_at   | 0.99 | 0.94 | A  | 187.10 | <b>2.91</b> | 0.00 | P   | 533.23  | CTMP      | 14q21         |
| 1554286_at   | 1.00 | 0.99 | PA | 15.73  | <b>2.91</b> | 0.00 | P   | 45.67   | TRIP11    | 1q21-q32      |
| 33736_at     | 0.99 | 0.93 | P  | 81.40  | <b>2.91</b> | 0.00 | P   | 233.37  | STOML1    | 15q24-q25     |
| 218971_s_at  | 1.00 | 0.95 | PA | 78.13  | <b>2.91</b> | 0.00 | P   | 223.10  | HSPC049   | 7q33          |
| 217737_x_at  | 0.99 | 0.94 | P  | 860.17 | <b>2.91</b> | 0.00 | P   | 2467.40 | C20orf43  | 20q13.31      |
| 201521_s_at  | 1.00 | 0.98 | P  | 281.43 | <b>2.90</b> | 0.00 | P   | 805.17  | NCBP2     | 3q29          |
| 218592_s_at  | 1.00 | 0.99 | P  | 504.47 | <b>2.90</b> | 0.00 | P   | 1444.67 | CECR5     | 22q11.2       |
| 1559103_s_at | 0.97 | 0.87 | P  | 10.13  | <b>2.90</b> | 0.00 | P   | 28.80   |           |               |
| 225511_at    | 1.00 | 0.96 | MA | 91.50  | <b>2.90</b> | 0.00 | P   | 262.20  | GPRC5B    | 16p12         |
| 1568877_a_at | 1.00 | 0.96 | P  | 78.50  | <b>2.90</b> | 0.01 | P   | 227.10  | ACBD5     | 10p12.1       |
| 1575292_a_at | 0.99 | 0.93 | PA | 44.70  | <b>2.90</b> | 0.01 | P   | 127.37  | MCOLN3    | 1p22.3        |
| 228522_at    | 0.99 | 0.92 | P  | 67.77  | <b>2.89</b> | 0.00 | P   | 192.17  |           |               |
| 35160_at     | 0.98 | 0.91 | P  | 88.13  | <b>2.89</b> | 0.00 | P   | 250.03  | LDB1      | 10q24-q25     |
| 232579_at    | 1.00 | 0.95 | PA | 33.13  | <b>2.89</b> | 0.01 | P   | 95.00   |           |               |
| 213220_at    | 1.00 | 0.97 | P  | 177.93 | <b>2.89</b> | 0.00 | PMA | 506.67  | LOC92482  | 10q25.3       |
| 201809_at    | 1.00 | 0.95 | A  | 56.37  | <b>2.89</b> | 0.00 | PMA | 160.80  | ENG       | 9q33-q34.1    |
| 222925_at    | 1.00 | 0.98 | P  | 354.63 | <b>2.89</b> | 0.00 | P   | 1008.40 | SKI       | 10q26.34      |
| 215629_s_at  | 1.00 | 0.96 | P  | 116.13 | <b>2.89</b> | 0.00 | P   | 330.70  | DLEU2     | 13q14.3       |
| 202288_at    | 0.99 | 0.93 | P  | 49.07  | <b>2.89</b> | 0.01 | P   | 140.40  | FRAP1     | 1p36.2        |
| 204957_at    | 1.00 | 0.97 | P  | 255.57 | <b>2.89</b> | 0.00 | P   | 725.47  | ORCSL     | 7q22.1        |
| 226625_at    | 1.00 | 0.98 | P  | 131.27 | <b>2.89</b> | 0.00 | P   | 373.27  | TGFBR3    | 1p33-p32      |
| 208820_at    | 0.99 | 0.92 | PA | 286.23 | <b>2.89</b> | 0.00 | P   | 814.43  | PTK2      | 8q24-qter     |
| 227539_at    | 0.99 | 0.92 | PA | 64.63  | <b>2.88</b> | 0.00 | P   | 183.57  | GNA13     | 17q24.3       |
| 235277_at    | 0.99 | 0.95 | A  | 15.10  | <b>2.88</b> | 0.00 | PA  | 43.07   | AMOTL1    | 11q14.3       |
| 225549_at    | 0.97 | 0.87 | P  | 113.77 | <b>2.88</b> | 0.02 | P   | 328.57  | DDX6      | 11q23.3       |
| 202124_s_at  | 0.99 | 0.93 | P  | 499.83 | <b>2.88</b> | 0.00 | P   | 1420.77 | ALSZCR3   | 2q33          |
| 208662_at    | 0.99 | 0.94 | P  | 289.80 | <b>2.88</b> | 0.00 | P   | 787.20  | GLRX      | 5q14          |
| 238002_at    | 0.98 | 0.91 | P  | 252.93 | <b>2.88</b> | 0.01 | P   | 727.27  | GOLPH4    | 3q26.2        |
| 204502_at    | 1.00 | 0.95 | PA | 63.77  | <b>2.88</b> | 0.01 | P   | 183.60  | SAMHD1    | 20pter-q12    |
| 225153_at    | 0.99 | 0.95 | P  | 536.17 | <b>2.88</b> | 0.00 | P   | 1513.93 | EFG1      | 3q25.1-q26.2  |
| 218087_s_at  | 1.00 | 0.99 | A  | 15.43  | <b>2.88</b> | 0.01 | P   | 43.80   | SORBS1    | 6q23.3-q24.1  |
| 208727_s_at  | 1.00 | 0.98 | P  | 240.37 | <b>2.87</b> | 0.00 | P   | 681.17  | GD42      | 1p36.1        |
| 206918_s_at  | 1.00 | 0.96 | P  | 404.47 | <b>2.87</b> | 0.00 | P   | 1143.93 | CPNE1     | 20q11.23      |
| 1554149_at   | 1.00 | 0.97 | P  | 443.30 | <b>2.87</b> | 0.00 | P   | 1253.60 | C3orf4    | 3p11-q11      |
| 212652_s_at  | 0.99 | 0.94 | P  | 331.33 | <b>2.87</b> | 0.00 | P   | 938.03  | SNX4      | 3q21.2        |
| 203054_s_at  | 1.00 | 0.95 | P  | 228.03 | <b>2.87</b> | 0.00 | P   | 648.83  | TCTA      | 3p21          |
| 20901_s_at   | 1.00 | 0.98 | P  | 648.67 | <b>2.87</b> | 0.00 | PMA | 183.40  | MSPR      | 12p13         |
| 227012_at    | 1.00 | 0.96 | P  | 315.17 | <b>2.87</b> | 0.00 | P   | 892.30  | MCFP      | 7q21.13       |
| 205010_at    | 1.00 | 0.95 | P  | 177.73 | <b>2.87</b> | 0.01 | P   | 501.83  | FLJ10613  | xp11.22       |
| 218440_at    | 1.00 | 0.97 | P  | 180.10 | <b>2.86</b> | 0.00 | P   | 508.07  | MCCC1     | 3q27          |
| 207446_s_at  | 1.00 | 0.98 | P  | 742.17 | <b>2.86</b> | 0.00 | P   | 2092.20 | GNB1      | 1p36.33       |
| 212349_at    | 1.00 | 0.97 | PA | 67.27  | <b>2.</b>   |      |     |         |           |               |

|              |      |      |      |         |             |      |      |         |           |               |
|--------------|------|------|------|---------|-------------|------|------|---------|-----------|---------------|
| 230706_s_at  | 1.00 | 0.95 | P    | 97.00   | <b>2.84</b> | 0.00 | P    | 272.63  | MGC2408   | 3q27.3        |
| 202276_at    | 1.00 | 0.98 | P    | 859.83  | <b>2.84</b> | 0.01 | P    | 2412.33 | SHFM1     | 7q21.3-q22.1  |
| 227756_at    | 1.00 | 0.96 | MA   | 38.40   | <b>2.84</b> | 0.00 | P    | 107.20  | MGC26990  | 15q21.3       |
| 222209_s_at  | 0.99 | 0.94 | P    | 247.83  | <b>2.84</b> | 0.00 | P    | 694.63  | FLJ22104  | 11q14.1       |
| 208442_s_at  | 0.98 | 0.91 | P    | 87.40   | <b>2.84</b> | 0.01 | P    | 245.80  | ATM       | 11q22-q23     |
| 1553750_a_at | 0.97 | 0.89 | PM   | 20.57   | <b>2.84</b> | 0.00 | P    | 57.90   | MGC33371  | 11q21         |
| 226556_at    | 1.00 | 0.96 | P    | 419.00  | <b>2.84</b> | 0.00 | P    | 1171.17 |           |               |
| 213763_at    | 0.99 | 0.93 | A    | 79.47   | <b>2.84</b> | 0.00 | P    | 222.47  | HIPK2     | 7q32-q34      |
| 203895_s_at  | 1.00 | 0.97 | A    | 59.27   | <b>2.84</b> | 0.00 | P    | 163.23  | DFNA5     | 7p15          |
| 231976_at    | 0.98 | 0.90 | P    | 40.97   | <b>2.84</b> | 0.01 | P    | 116.07  | WINS1     | 15q26.3       |
| 235206_at    | 0.99 | 0.92 | A    | 42.27   | <b>2.84</b> | 0.00 | PM   | 118.50  | SCAND1    | 0q11.1-q11.23 |
| 228013_at    | 1.00 | 0.95 | P    | 98.93   | <b>2.84</b> | 0.00 | P    | 275.60  | PPP2R2A   | 8p21.1        |
| 221882_s_at  | 1.00 | 0.96 | P    | 190.43  | <b>2.83</b> | 0.00 | P    | 535.77  | TMEM8     | 16p13.3       |
| 202652_at    | 0.99 | 0.93 | A    | 33.33   | <b>2.83</b> | 0.00 | PM,A | 92.90   | APBB1     | 11p15         |
| 1555882_at   | 0.99 | 0.93 | P,A  | 70.83   | <b>2.83</b> | 0.00 | P    | 198.17  | LOC169981 | xp11.22       |
| 242664_at    | 1.00 | 0.95 | P,A  | 8.87    | <b>2.83</b> | 0.02 | P    | 25.17   |           |               |
| 215159_s_at  | 0.97 | 0.87 | A    | 31.63   | <b>2.83</b> | 0.00 | P    | 88.70   | FLJ13052  | x36.33-p36.21 |
| 204388_s_at  | 0.99 | 0.93 | A    | 20.63   | <b>2.83</b> | 0.01 | P    | 56.67   | MAOA      | xp11.4-p11.3  |
| 233061_at    | 0.98 | 0.90 | P    | 53.50   | <b>2.83</b> | 0.01 | P    | 149.17  | C20orf142 | 20q13.12      |
| 230416_at    | 0.99 | 0.93 | P    | 126.67  | <b>2.83</b> | 0.00 | P    | 353.77  | SLC18A2   | 10q25         |
| 203196_at    | 1.00 | 0.97 | P    | 180.80  | <b>2.83</b> | 0.00 | P    | 504.03  | ABCC4     | 13q32         |
| 225384_at    | 1.00 | 0.97 | P    | 278.77  | <b>2.83</b> | 0.00 | P    | 776.53  | DOCK7     | 1p32.1        |
| 1552893_at   | 0.97 | 0.88 | P    | 56.80   | <b>2.83</b> | 0.01 | P    | 159.00  | CAM-KIIN  | 3q27.3        |
| 214931_s_at  | 1.00 | 0.98 | P    | 85.17   | <b>2.83</b> | 0.00 | P    | 237.83  | SRPK2     | 7q22-q31.1    |
| 228315_at    | 0.99 | 0.94 | P    | 252.00  | <b>2.83</b> | 0.01 | P    | 706.53  |           |               |
| 201538_s_at  | 0.99 | 0.95 | P,A  | 53.70   | <b>2.83</b> | 0.00 | P    | 149.87  | DUSP3     | 17q21         |
| 235219_at    | 0.99 | 0.94 | P,A  | 20.63   | <b>2.83</b> | 0.00 | P    | 57.43   | LOC116349 | 5p15.33       |
| 222409_at    | 1.00 | 0.98 | P    | 566.63  | <b>2.82</b> | 0.00 | P    | 1571.97 | CORO1C    | 12q24.1       |
| 210006_at    | 1.00 | 0.97 | P    | 111.23  | <b>2.82</b> | 0.00 | P    | 308.40  | KPZ564O2  | 3q21.1        |
| 1558742_at   | 1.00 | 0.96 | P    | 40.57   | <b>2.82</b> | 0.00 | P    | 112.57  | DEI1      | 16p13.2       |
| 203206_at    | 1.00 | 0.96 | PM,A | 145.13  | <b>2.82</b> | 0.00 | P    | 404.27  | KIAA0140  | 10q26.2       |
| 213017_at    | 1.00 | 0.96 | P    | 339.63  | <b>2.82</b> | 0.01 | P    | 945.57  | ABHD3     | 18q11.2       |
| 202234_s_at  | 1.00 | 0.98 | P    | 59.73   | <b>2.82</b> | 0.01 | P    | 165.80  | SLC16A1   | 1p12          |
| 214835_s_at  | 1.00 | 0.97 | P    | 249.93  | <b>2.82</b> | 0.00 | P    | 1788.49 | SUCLG2    | 3p14.3        |
| 200600_at    | 1.00 | 0.96 | P    | 1055.00 | <b>2.81</b> | 0.00 | P    | 2924.70 | MSN       | xq11.2-q12    |
| 233842_x_at  | 1.00 | 0.96 | P    | 766.10  | <b>2.81</b> | 0.00 | P    | 2122.80 | C20orf43  | 20q13.31      |
| 227204_at    | 0.98 | 0.90 | A    | 89.03   | <b>2.81</b> | 0.00 | P    | 247.47  | PARDEG    | 18q23         |
| 241453_at    | 1.00 | 0.96 | P    | 37.20   | <b>2.81</b> | 0.00 | P    | 102.40  | PTK2      | 8q24-qter     |
| 233561_at    | 0.98 | 0.91 | A    | 73.3    | <b>2.81</b> | 0.01 | PA   | 20.61   |           |               |
| 224966_s_at  | 1.00 | 0.99 | P,A  | 81.47   | <b>2.81</b> | 0.00 | P    | 224.63  | LOC56931  | 19p13.3       |
| 222129_at    | 1.00 | 0.99 | P    | 180.83  | <b>2.81</b> | 0.01 | P    | 500.30  | C2orf17   | 2q36.1        |
| 225915_at    | 0.99 | 0.93 | A    | 40.90   | <b>2.80</b> | 0.00 | P    | 113.13  | CAB39L    | 13q14.12      |
| 212820_at    | 1.00 | 0.99 | P    | 161.43  | <b>2.80</b> | 0.00 | P    | 444.63  | RC3       | 19q15.3       |
| 200940_s_at  | 1.00 | 0.98 | P    | 245.90  | <b>2.80</b> | 0.00 | P    | 675.87  | RERE      | 1p36.3-p36.2  |
| 203852_s_at  | 0.99 | 0.94 | P    | 316.67  | <b>2.80</b> | 0.01 | P    | 881.33  | SMN1      | 5q13          |
| 214259_s_at  | 1.00 | 0.95 | P    | 303.47  | <b>2.80</b> | 0.01 | P    | 837.70  | AKR7A2    | p35.1-p36.23  |
| 242134_at    | 0.98 | 0.91 | P,A  | 20.47   | <b>2.80</b> | 0.02 | P    | 57.80   |           |               |
| 212249_at    | 0.98 | 0.90 | P    | 60.87   | <b>2.80</b> | 0.02 | P    | 169.40  | PIK3R1    | 5q13.1        |
| 1557567_s_at | 1.00 | 0.95 | M    | 22.67   | <b>2.80</b> | 0.01 | P    | 62.90   | LOC148987 | 19q13         |
| 205442_at    | 1.00 | 0.98 | P    | 163.40  | <b>2.80</b> | 0.01 | P    | 452.50  | KIAA0626  | 4q32.3        |
| 230739_at    | 1.00 | 1.00 | P    | 364.13  | <b>2.80</b> | 0.01 | P    | 1004.60 |           |               |
| 204408_at    | 1.00 | 0.96 | P    | 240.43  | <b>2.80</b> | 0.00 | P    | 664.10  | APEX2     | xp11.22       |
| 201823_s_at  | 1.00 | 0.97 | P    | 454.67  | <b>2.80</b> | 0.00 | P    | 1251.00 | RNF14     | 5q23.3-q31.1  |
| 220735_s_at  | 0.98 | 0.93 | A    | 49.67   | <b>2.80</b> | 0.01 | P    | 35.00   | SENP7     | 3q12          |
| 201752_s_at  | 0.98 | 0.90 | P    | 227.43  | <b>2.79</b> | 0.00 | P    | 627.03  | ADD3      | 0q24.2-q24.3  |
| 218724_s_at  | 0.97 | 0.88 | PM,A | 23.00   | <b>2.79</b> | 0.01 | P    | 63.13   | TGIF2     | 20q11.2-q12   |
| 226763_at    | 0.98 | 0.91 | P    | 154.33  | <b>2.79</b> | 0.01 | P    | 426.27  | SESTD1    | 2q31.3        |
| 204371_s_at  | 1.00 | 0.97 | A    | 44.33   | <b>2.79</b> | 0.00 | P    | 121.80  | KHSRP     | 19p13.3       |
| 203485_s_at  | 0.99 | 0.92 | P    | 269.30  | <b>2.78</b> | 0.01 | P    | 760.17  | RNF126    | 16p11.3       |
| 202157_s_at  | 0.99 | 0.94 | P    | 545.20  | <b>2.78</b> | 0.00 | P    | 1496.00 | CUGBP2    | 10p13         |
| 227696_at    | 1.00 | 0.96 | P    | 255.97  | <b>2.78</b> | 0.00 | P    | 700.90  | EXOSC6    | 16q22.1       |
| 202369_s_at  | 0.98 | 0.91 | P    | 340.83  | <b>2.78</b> | 0.00 | P    | 939.73  | TRAM2     | 6p21.1-p12    |
| 229173_at    | 0.99 | 0.93 | P    | 168.60  | <b>2.78</b> | 0.00 | P    | 463.87  | KIAA1715  | 2q31          |
| 201734_at    | 0.99 | 0.96 | P    | 408.93  | <b>2.78</b> | 0.00 | P    | 1268.93 | CLCN3     | 4q33          |
| 236417_at    | 0.99 | 0.92 | P    | 39.17   | <b>2.78</b> | 0.01 | P    | 108.13  |           |               |
| 222572_at    | 0.99 | 0.93 | P    | 311.77  | <b>2.78</b> | 0.00 | P    | 856.07  | PPM2C     | 8q22.1        |
| 219868_s_at  | 0.99 | 0.92 | P,A  | 112.17  | <b>2.78</b> | 0.00 | P    | 308.43  | ANKFY1    | 17p13.3       |
| 223465_at    | 0.99 | 0.91 | P    | 118.37  | <b>2.78</b> | 0.01 | P    | 327.47  | COL4A3BP  | 5q13.3        |
| 222416_at    | 0.99 | 0.94 | P    | 445.30  | <b>2.78</b> | 0.02 | P    | 1231.37 | PYCS      | 10q24.3       |
| 1554447_at   | 1.00 | 0.95 | P    | 24.10   | <b>2.78</b> | 0.01 | P    | 66.03   |           |               |
| 224359_s_at  | 0.99 | 0.92 | A    | 28.40   | <b>2.78</b> | 0.00 | PA   | 77.93   | HOOK3     | 8p11.21       |
| 242580_at    | 0.99 | 0.91 | P,A  | 25.43   | <b>2.78</b> | 0.00 | P    | 69.73   |           |               |
| 201716_at    | 1.00 | 0.99 | PM   | 342.50  | <b>2.77</b> | 0.01 | P    | 945.27  | SNX1      | 15q22.1       |
| 239491_at    | 0.98 | 0.91 | P,A  | 49.10   | <b>2.77</b> | 0.00 | P    | 134.40  | FLJ37659  | 13q21.33      |
| 235006_at    | 0.99 | 0.92 | P    | 85.00   | <b>2.77</b> | 0.00 | P    | 232.80  | MGC13017  | 5q31.2        |
| 203092_at    | 0.99 | 0.93 | P    | 93.90   | <b>2.77</b> | 0.01 | P    | 258.23  | TIMM44    | 9p13.3-p13.2  |
| 212665_at    | 0.99 | 0.94 | P    | 266.37  | <b>2.77</b> | 0.00 | P    | 726.33  | TIPARP    | 3q25.31       |
| 203386_at    | 0.99 | 0.92 | P    | 224.07  | <b>2.77</b> | 0.01 | P    | 613.40  | TBC1D4    | 13q21.33      |
| 1570315_at   | 0.98 | 0.91 | P    | 73.93   | <b>2.77</b> | 0.01 | P    | 200.27  |           | 15q23.3       |
| 221706_s_at  | 1.00 | 0.97 | P,A  | 69.83   | <b>2.77</b> | 0.01 | P    | 191.53  | MDS032    | 19p13.12      |
| 227328_at    | 0.99 | 0.95 | M,A  | 64.60   | <b>2.77</b> | 0.01 | P    | 176.00  | CAMTA1    | 1p36.23       |
| 200822_x_at  | 1.00 | 0.99 | P    | 1722.70 | <b>2.77</b> | 0.00 | P    | 4699.43 | TP11      | 12p13         |
| 235573_at    | 0.99 | 0.94 | P    | 42.87   | <b>2.76</b> | 0.00 | P    | 116.13  |           |               |
| 222833_at    | 0.99 | 0.96 | P    | 258.53  | <b>2.76</b> | 0.01 | P    | 705.67  | CAPNS2    | 16q13         |
| 204108_at    | 0.99 | 0.94 | P,A  | 139.83  | <b>2.76</b> | 0.00 | P    | 381.10  | NFYA      | 6p21.3        |
| 215501_s_at  | 0.98 | 0.89 | P,A  | 45.50   | <b>2.76</b> | 0.00 | P    | 124.93  | DUSP10    | 1q41          |
| 228390_at    | 1.00 | 0.95 | P,A  | 29.00   | <b>2.76</b> | 0.02 | P    | 79.90   |           |               |
| 37433_at     | 0.99 | 0.94 | P    | 34.10   | <b>2.76</b> | 0.00 | P    | 92.23   | MIZ1      | 18q21.1       |
| 227101_at    | 0.99 | 0.95 | P    | 63.07   | <b>2.76</b> | 0.00 | P    | 172.60  | LOC188856 | 13q32.2       |
| 208453_s_at  | 0.99 | 0.95 | P    | 187.27  | <b>2.76</b> | 0.00 | P    | 512.23  | XPNPPEP1  | 10q25.3       |
| 241913_at    | 0.97 | 0.87 | P    | 14.87   | <b>2.76</b> | 0.01 | P    | 40.20   |           |               |
| 52159_at     | 0.99 | 0.93 | P    | 107.27  | <b>2.76</b> | 0.00 | P    | 290.00  | HEMK      | 3p21.3        |
| 226116_at    | 1.00 | 0.97 | P    | 304.30  | <b>2.76</b> | 0.00 | P    | 826.10  |           |               |
| 225468_at    | 0.99 | 0.95 | PM   | 249.83  | <b>2.75</b> | 0.00 | P    | 651.40  | FLJ36874  | 11q12.2       |
| 217787_s_at  | 1.00 | 0.95 | P    | 121.77  | <b>2.75</b> | 0.00 | P    | 330.33  | GALNT2    | 1q41-q42      |
| 235694_at    | 1.00 | 0.97 | P    | 121.70  | <b>2.75</b> | 0.00 | P    | 328.90  | TCFL5     | 20q13.3-qter  |
| 1568329_at   | 1.00 | 0.98 | A    | 59.73   | <b>2.75</b> | 0.00 | PM   | 161.37  | NFKB1L2   | 8q24.3        |
| 239066_at    | 0.98 | 0.89 | A    | 29.00   | <b>2.75</b> | 0.02 | PM   | 79.50   |           |               |
| 207231_at    | 1.00 | 0.98 | P    | 121.57  | <b>2.74</b> | 0.00 | P    | 328.17  | DZIP3     | 3q13.13       |
| 36566_at     | 1.00 | 0.98 | P    | 121.57  | <b>2.74</b> | 0.00 | P    | 328.17  | CTNS      | 17p13         |
| 203253_s_at  | 1.00 | 0.96 | P    | 374.07  | <b>2.74</b> | 0.00 | P    | 1011.30 | KIAA0433  | 5q21.2        |
| 203674_at    | 1.00 | 0.99 | P    | 184.30  | <b>2.74</b> | 0.00 | P    | 496.53  | HELZ      | 17q24.3       |
| 238573_at    | 0.99 | 0.92 | M,A  | 70.10   | <b>2.74</b> | 0.01 | P    | 190.23  |           |               |
| 242051_at    | 0.99 | 0.93 | A    | 16.23   | <b>2.74</b> | 0.01 | P    | 44.30   |           |               |
| 204440_at    | 0.98 | 0.91 | P    | 130.33  | <b>2.74</b> | 0.00 | P    | 352.60  | CD83      | 6p23          |
| 244726_at    | 0.99 | 0.93 | P,A  | 67.73   | <b>2.74</b> | 0.00 | P    | 182.97  |           |               |
| 235484_at    | 0.97 | 0.88 | P    | 117.93  | <b>2.74</b> | 0.01 | P    | 320.67  | PTAR1     | 9q21.13       |
| 239329_at    | 0.99 | 0.93 | P    | 38.63   | <b>2.74</b> | 0.00 | P    | 104.47  | RAB21     | 12q15         |
| 200911_s_at  | 1.00 | 0.98 | P    | 524.03  | <b>2.73</b> | 0.00 | P    | 1411.17 | TACC1     | 8p11          |
| 241584_at    | 0.98 | 0.91 | P,A  | 34.53   | <b>2.73</b> | 0.00 | P    | 93.40   |           |               |
| 1552302_at   | 0.99 | 0.93 | P    | 21.00   | <b>2.73</b> | 0.01 | P    | 56.80   | MGC20235  | 17q21.31      |
| 211801_x_at  | 1.00 | 0.96 | P,A  | 118.40  | <b>2.73</b> | 0.00 | P    | 319.73  | MFN1      | 3q27.1        |
| 1556865_at   | 0.99 | 0.92 | A    | 21.83   | <b>2.73</b> | 0.01 | P    | 59.20   |           |               |
| 228208_at    | 0.99 | 0.95 | P    | 197.00  | <b>2.73</b> | 0.00 | P    | 440.53  | ZSWIM6    | 5q12.1        |
| 203212_s_at  | 0.99 | 0.95 | P,A  | 191.10  | <b>2.73</b> | 0.00 | P    | 514     |           |               |

|             |      |      |       |         |      |      |    |         |                       |               |
|-------------|------|------|-------|---------|------|------|----|---------|-----------------------|---------------|
| 242239_at   | 0.98 | 0.90 | P     | 34.50   | 2.71 | 0.02 | P  | 92.87   | NOPD1                 | 10p13         |
| 225946_at   | 0.99 | 0.92 | P     | 92.47   | 2.71 | 0.01 | P  | 249.47  | C12orf2               | 12p12.3       |
| 231920_s_at | 0.98 | 0.90 | P     | 98.30   | 2.71 | 0.02 | P  | 268.60  | CSNK1G1               | 3q22.1-q22.31 |
| 205957_at   | 0.98 | 0.91 | P     | 117.17  | 2.71 | 0.00 | P  | 297.43  | FLXNB3                | xq23          |
| 202320_at   | 0.99 | 0.93 | A     | 160.00  | 2.71 | 0.00 | P  | 429.00  | GTF3C1                | 16p12         |
| 213816_s_at | 0.99 | 0.94 | PA    | 64.60   | 2.71 | 0.00 | P  | 173.33  | MET                   | 7q31          |
| 1569024_at  | 0.98 | 0.91 | P     | 38.03   | 2.71 | 0.00 | P  | 102.63  |                       | 4q22.1        |
| 209086_x_at | 1.00 | 0.99 | A     | 102.00  | 2.71 | 0.00 | P  | 272.03  | MCAM                  | 11q23.3       |
| 238511_at   | 0.98 | 0.91 | A     | 22.83   | 2.71 | 0.01 | PA | 61.50   |                       |               |
| 227068_at   | 0.99 | 0.93 | P     | 813.33  | 2.71 | 0.00 | P  | 2174.07 | PGK1                  | xq13          |
| 200743_s_at | 0.99 | 0.94 | P     | 388.07  | 2.71 | 0.00 | P  | 1028.97 | CLN2                  | 11p15         |
| 201985_at   | 0.98 | 0.92 | P     | 253.60  | 2.71 | 0.01 | P  | 682.67  | KIAA0196              | 8p22          |
| 213224_s_at | 1.00 | 0.96 | P     | 73.50   | 2.70 | 0.00 | P  | 195.33  | LOC92482              | 10q25.3       |
| 211213_at   | 1.00 | 0.96 | PM    | 11.87   | 2.70 | 0.01 | P  | 31.20   | ORCSL                 | 7q22.1        |
| 202296_s_at | 1.00 | 0.98 | P     | 704.30  | 2.70 | 0.00 | P  | 1873.73 | RER1                  | 1pter-q24     |
| 202913_at   | 1.00 | 0.97 | M.A   | 138.70  | 2.70 | 0.00 | P  | 368.87  | ARHGEF11              | 1q21          |
| 214155_s_at | 0.99 | 0.93 | P     | 151.57  | 2.70 | 0.00 | P  | 404.13  | LOC113251             | 12q13.12      |
| 232048_at   | 0.99 | 0.92 | P     | 33.70   | 2.70 | 0.00 | P  | 89.77   | MGC33371              | 11q21         |
| 1556081_at  | 0.98 | 0.89 | PA    | 19.57   | 2.69 | 0.03 | P  | 53.90   |                       |               |
| 226859_at   | 1.00 | 0.99 | P     | 90.13   | 2.69 | 0.01 | P  | 240.10  | NGN10                 | 9q32          |
| 213093_at   | 1.00 | 0.97 | P     | 85.00   | 2.69 | 0.00 | P  | 224.77  | PRKCA                 | 17q22-q23.2   |
| 235030_at   | 1.00 | 0.96 | PA    | 25.47   | 2.69 | 0.02 | P  | 68.67   | MGC15606              | 3q12.3        |
| 217599_x_at | 0.99 | 0.92 | P     | 141.40  | 2.69 | 0.01 | P  | 378.47  | HIC                   | 7q31.2        |
| 225213_at   | 0.99 | 0.94 | P     | 329.60  | 2.69 | 0.00 | P  | 875.17  | TA-PP2C               | 12q24.13      |
| 243636_s_at | 0.97 | 0.88 | PA    | 14.80   | 2.69 | 0.02 | P  | 39.93   |                       |               |
| 212239_at   | 0.99 | 0.94 | P     | 123.93  | 2.69 | 0.01 | P  | 329.60  | PIK3R1                | 5q13.1        |
| 232643_at   | 0.99 | 0.94 | A     | 27.20   | 2.69 | 0.02 | PA | 72.83   |                       |               |
| 218152_at   | 1.00 | 0.97 | P     | 251.80  | 2.69 | 0.00 | P  | 667.77  | HMG20A                | 15q24         |
| 154381_s_at | 0.99 | 0.92 | P     | 39.03   | 2.69 | 0.01 | P  | 103.83  |                       |               |
| 239989_at   | 1.00 | 0.95 | P     | 31.87   | 2.69 | 0.00 | P  | 84.37   |                       |               |
| 218529_at   | 0.98 | 0.90 | P     | 185.50  | 2.69 | 0.00 | P  | 488.83  | 8D6A                  | 9p13.3-p13.2  |
| 234157_at   | 1.00 | 0.98 | PA    | 49.07   | 2.69 | 0.00 | PM | 129.43  |                       |               |
| 224058_x_at | 0.99 | 0.93 | P.M.A | 51.67   | 2.68 | 0.00 | P  | 136.67  | LOC158166             | 10p11.21      |
| 234105_at   | 0.98 | 0.90 | P.A   | 51.23   | 2.68 | 0.01 | P  | 135.67  | KFZp761A1             | 16p13.3       |
| 227337_at   | 0.99 | 0.92 | A     | 46.23   | 2.68 | 0.00 | P  | 122.43  | Lrp2bp                | 4q35.1        |
| 225823_at   | 0.99 | 0.92 | P     | 573.40  | 2.68 | 0.00 | P  | 1507.27 | QIL1                  | 19p13.3       |
| 231835_at   | 0.99 | 0.94 | PA    | 114.10  | 2.68 | 0.00 | P  | 300.50  | MGC26818              | 1p36.32       |
| 241730_at   | 1.00 | 0.98 | P     | 24.63   | 2.68 | 0.01 | P  | 65.13   | MYNN                  | 3q26.31       |
| 228851_s_at | 1.00 | 0.98 | P     | 45.73   | 2.68 | 0.01 | P  | 141.51  | GNFG                  | 19p13.3       |
| 243345_at   | 0.99 | 0.92 | P     | 29.50   | 2.68 | 0.03 | P  | 78.90   | RNF14                 | 3q23.3-q31.1  |
| 226389_s_at | 1.00 | 0.96 | A     | 71.30   | 2.68 | 0.00 | P  | 188.63  | RAPGEF1               | 9q34.3        |
| 157052_at   | 1.00 | 0.96 | P     | 38.47   | 2.68 | 0.01 | P  | 101.67  | FLJ33761              | 18q11.2       |
| 156797_x_at | 1.00 | 0.97 | A     | 15.20   | 2.68 | 0.00 | PA | 40.03   |                       |               |
| 208917_x_at | 1.00 | 0.99 | P.A   | 49.50   | 2.68 | 0.01 | P  | 136.23  | FLJ13052              | 3p6.3-p36.21  |
| 224821_at   | 1.00 | 0.96 | P     | 492.57  | 2.67 | 0.00 | P  | 1296.37 | MGC15429              | 3p21.31       |
| 230123_at   | 0.98 | 0.91 | A     | 55.03   | 2.67 | 0.00 | P  | 145.97  | FLJ10420              | 1p36.13       |
| 225056_at   | 0.99 | 0.94 | P     | 202.70  | 2.67 | 0.02 | P  | 538.17  | SIPA1L2               | 1q42.2        |
| 225424_at   | 1.00 | 0.97 | P     | 87.77   | 2.67 | 0.01 | P  | 231.00  | GPAI1                 | 10q25.3       |
| 219973_at   | 1.00 | 0.96 | P     | 75.67   | 2.67 | 0.01 | P  | 199.67  | FLJ23548              | 4q36          |
| 215694_at   | 0.98 | 0.89 | PA    | 17.87   | 2.67 | 0.01 | P  | 47.50   | SPATA5L1              | 15q15.1       |
| 204819_at   | 0.99 | 0.94 | P     | 125.97  | 2.67 | 0.00 | P  | 330.20  | FGD1                  | xp11.21       |
| 208675_s_at | 1.00 | 0.98 | P     | 925.43  | 2.67 | 0.00 | P  | 2432.73 | DDOST                 | 1p36.1        |
| 206092_x_at | 1.00 | 0.95 | PA    | 62.00   | 2.67 | 0.00 | P  | 163.17  | C20orf41              | 20q13.3       |
| 209553_at   | 0.98 | 0.89 | P     | 115.17  | 2.67 | 0.01 | P  | 311.30  | KIAA0804              | 3q29          |
| 207030_s_at | 0.99 | 0.93 | P     | 97.23   | 2.67 | 0.00 | P  | 254.83  | CSRP2                 | 12q21.1       |
| 224800_at   | 1.00 | 0.99 | P     | 731.00  | 2.66 | 0.00 | P  | 1916.30 | WDFY1                 | 2q36.3        |
| 225789_at   | 0.98 | 0.91 | M.A   | 172.03  | 2.66 | 0.01 | P  | 449.33  | CENTG3                | 7q36.1        |
| 211572_x_at | 0.99 | 0.94 | P     | 57.47   | 2.66 | 0.00 | P  | 150.30  | SLC23A2               | 20p13         |
| 238663_at   | 0.98 | 0.92 | P     | 60.10   | 2.66 | 0.00 | P  | 158.23  | ABI1                  | 10q11.2       |
| 228856_at   | 0.98 | 0.91 | PA    | 29.50   | 2.66 | 0.00 | P  | 77.60   | MGC2474               | 16p11.2       |
| 202043_s_at | 1.00 | 0.99 | P     | 951.30  | 2.66 | 0.00 | P  | 2492.43 | SMS                   | xp22.1        |
| 238174_at   | 0.97 | 0.88 | P     | 14.00   | 2.66 | 0.01 | P  | 36.73   |                       |               |
| 202424_at   | 1.00 | 0.96 | P     | 957.53  | 2.66 | 0.00 | P  | 2497.60 | MAP2K2                | 19p13.3       |
| 228043_at   | 1.00 | 0.98 | P     | 50.10   | 2.66 | 0.01 | P  | 132.50  | FLJ112787             | 3q13.12       |
| 239466_at   | 1.00 | 0.96 | P     | 46.90   | 2.66 | 0.01 | P  | 123.20  |                       |               |
| 204317_at   | 0.98 | 0.91 | P     | 76.83   | 2.66 | 0.01 | P  | 202.23  | GTSE1                 | 2q13.2-q13.3  |
| 224670_at   | 0.99 | 0.92 | P     | 102.50  | 2.66 | 0.00 | P  | 268.87  | C20orf35              | 20q13.12      |
| 224443_x_at | 0.99 | 0.93 | P     | 100.63  | 2.65 | 0.01 | P  | 265.27  | FLJ32065              | 17q24.2       |
| 219148_at   | 0.99 | 0.97 | P     | 81.73   | 2.65 | 0.01 | P  | 2274.10 | TOPK                  | 6p11.2        |
| 229348_at   | 0.99 | 0.92 | P.M   | 134.53  | 2.65 | 0.01 | P  | 352.40  | TERE1                 | 1pter         |
| 226341_at   | 0.99 | 0.92 | P     | 93.57   | 2.65 | 0.01 | P  | 246.57  |                       |               |
| 225623_at   | 1.00 | 0.98 | P     | 171.53  | 2.65 | 0.00 | P  | 448.60  | KIAA1737              | 14q24.3       |
| 228229_at   | 1.00 | 0.98 | P     | 85.63   | 2.65 | 0.00 | P  | 224.53  | MGC15476              | 19q13.33      |
| 212747_at   | 1.00 | 0.95 | P     | 165.50  | 2.65 | 0.00 | P  | 1975.50 | ANKS1                 | 6p21.31       |
| 240113_at   | 0.98 | 0.89 | PM    | 42.77   | 2.65 | 0.02 | P  | 112.40  |                       |               |
| 225760_at   | 0.98 | 0.91 | P     | 236.87  | 2.65 | 0.00 | P  | 621.17  | KIAA1915              | 1p32.1        |
| 235263_at   | 0.99 | 0.93 | P     | 121.43  | 2.65 | 0.01 | P  | 318.93  | KFZP43A01a11.23-q21.1 |               |
| 208883_at   | 0.99 | 0.93 | P     | 53.13   | 2.65 | 0.02 | P  | 138.83  | D5                    | 8q22          |
| 228819_at   | 0.99 | 0.90 | A     | 25.50   | 2.65 | 0.01 | P  | 68.50   | A1BG                  | 19q13.4       |
| 223108_s_at | 0.99 | 0.95 | P     | 255.87  | 2.65 | 0.00 | P  | 667.90  | PS1D                  | 1p35.1        |
| 207769_s_at | 1.00 | 0.98 | P     | 275.97  | 2.65 | 0.01 | P  | 721.67  | PQBP1                 | xp11.23       |
| 229994_at   | 0.98 | 0.90 | PA    | 13.30   | 2.65 | 0.03 | P  | 35.93   |                       |               |
| 212841_x_at | 0.99 | 0.94 | A     | 54.67   | 2.65 | 0.01 | P  | 142.67  | PPFIBP2               | 11p15.4       |
| 212144_at   | 1.00 | 0.98 | P     | 282.23  | 2.65 | 0.00 | P  | 656.33  | UNC84B                | 2q8.1         |
| 225352_at   | 1.00 | 0.98 | P     | 215.63  | 2.65 | 0.00 | P  | 561.43  | TLOC1                 | 3q26.2-q27    |
| 1555989_at  | 0.98 | 0.91 | P     | 102.20  | 2.64 | 0.00 | P  | 267.87  | DAAM1                 | 14q23.1       |
| 225143_at   | 0.99 | 0.93 | P     | 335.60  | 2.64 | 0.00 | P  | 869.53  | SFXN4                 | 10q26.13      |
| 225240_x_at | 1.00 | 0.97 | P     | 194.43  | 2.64 | 0.01 | P  | 508.23  | MSI2                  | 17q23.2       |
| 221531_at   | 0.99 | 0.92 | P     | 601.87  | 2.64 | 0.01 | P  | 1571.63 | REC14                 | 15q24.1       |
| 1558409_at  | 1.00 | 0.96 | A     | 16.17   | 2.64 | 0.01 | P  | 42.20   |                       |               |
| 226972_s_at | 1.00 | 0.98 | M.A   | 43.03   | 2.64 | 0.00 | P  | 112.07  | KFZP434G1             | 7q33          |
| 213216_at   | 0.99 | 0.92 | P     | 61.83   | 2.64 | 0.01 | P  | 161.67  | KIAA0459              | 1p36.13       |
| 202946_x_at | 1.00 | 0.97 | P     | 359.93  | 2.63 | 0.00 | P  | 934.23  | BTBD3                 | 20p12.1       |
| 228775_at   | 0.99 | 0.94 | P     | 389.47  | 2.63 | 0.01 | P  | 1013.33 |                       |               |
| 209853_s_at | 0.99 | 0.95 | P     | 253.13  | 2.63 | 0.01 | P  | 662.73  | PSME3                 | 17q21         |
| 203010_at   | 0.99 | 0.95 | PA    | 160.27  | 2.63 | 0.01 | P  | 414.20  | STAT5A                | 17q11.2       |
| 204394_at   | 1.00 | 0.96 | PA    | 83.57   | 2.63 | 0.01 | P  | 216.97  | SLC43A1               | 1p11.2-p11.1  |
| 232113_at   | 0.98 | 0.89 | A     | 12.50   | 2.63 | 0.02 | P  | 32.57   |                       |               |
| 211994_at   | 1.00 | 0.98 | P     | 292.57  | 2.63 | 0.00 | P  | 734.47  |                       |               |
| 211126_s_at | 1.00 | 0.98 | P     | 77.90   | 2.63 | 0.00 | P  | 201.50  | CSRP2                 | 12q21.1       |
| 218867_s_at | 0.99 | 0.95 | PA    | 139.90  | 2.63 | 0.00 | P  | 362.47  | FLJ21415              | 12q24.22      |
| 238831_at   | 1.00 | 0.98 | P     | 50.60   | 2.62 | 0.01 | P  | 131.67  | FLJ10525              | 4p14          |
| 231858_x_at | 0.98 | 0.90 | M.A   | 34.77   | 2.62 | 0.00 | P  | 90.27   | KFZp761E1             | 11q13.1       |
| 223413_s_at | 1.00 | 0.98 | P     | 294.93  | 2.62 | 0.00 | P  | 761.90  | LYAR                  | 4p16.2        |
| 226279_at   | 1.00 | 0.96 | P     | 248.10  | 2.62 | 0.00 | P  | 642.30  | SPUVE                 | 11q14.1       |
| 236832_at   | 0.97 | 0.88 | A     | 30.00   | 2.62 | 0.02 | P  | 77.70   | LOC221442             | 6p21.1        |
| 222421_at   | 1.00 | 0.95 | P     | 391.77  | 2.62 | 0.00 | P  | 1012.87 | UBE2H                 | 7q32          |
| 223286_at   | 0.99 | 0.93 | P     | 239.57  | 2.62 | 0.01 | P  | 626.13  | DERP6                 | 17p13.2       |
| 230561_s_at | 0.98 | 0.90 | P     | 23.20   | 2.62 | 0.00 | P  | 60.17   | FLJ23861              | 2q34          |
| 241865_at   | 0.98 | 0.89 | P     | 39.63   | 2.62 | 0.01 | P  | 102.20  |                       |               |
| 236381_s_at | 0.98 | 0.90 | P     | 100.60  | 2.62 | 0.00 | P  | 259.87  | WDR8                  | 1p36.3        |
| 242918_at   | 0.98 | 0.90 | A     | 26.57   | 2.62 | 0.02 | PM | 69.83   | NASP                  | 1p34.1        |
| 228168_at   | 0.98 | 0.90 | PA    | 52.93   | 2.62 | 0.01 | P  | 136.93  | ATPG3                 | 2q31.2        |
| 204104_at   | 1.00 | 0.96 | P     | 78.17   | 2.62 | 0.00 | P  | 205.07  | SNAPC2                | 9p13.3-p13.2  |
| 213011_s_at | 1.00 | 0.99 | P     | 1637.73 | 2.62 | 0.00 | P  | 4220.33 | TP1                   | 12p13         |
| 212911_at   | 1.00 | 0.97 | P     | 49.07   | 2.62 | 0.00 | P  | 126.40  | KIAA0962              | 1p36.1        |
| 221958_s_at | 0.99 | 0.91 | P     | 137.70  | 2.61 | 0.00 | P  | 355.80  | FLJ23091              | 1p31.2        |
| 213008_at   | 0.98 | 0.91 | P     | 303.37  | 2.61 | 0.01 | P  | 783.13  | FLJ10719              | 15q25-q26     |
| 239035_at   | 0.99 | 0.92 | PA    | 40.30   | 2.61 | 0.01 | P  | 115.07  | MTHFR                 | 1p3           |



|              |      |      |       |         |      |      |       |         |              |               |
|--------------|------|------|-------|---------|------|------|-------|---------|--------------|---------------|
| 1554148_a_at | 0.98 | 0.91 | P     | 94.70   | 2.60 | 0.00 | P     | 243.43  | SLC33A1      | 3q25.31       |
| 213607_x_at  | 1.00 | 0.95 | M.A   | 92.63   | 2.60 | 0.02 | P     | 238.47  | FLJ13052     | x36.33-p36.21 |
| 225924_at    | 1.00 | 0.96 | P     | 148.53  | 2.60 | 0.00 | P     | 379.20  | KIAA1450     | 4q32.1        |
| 202382_s_at  | 1.00 | 0.96 | P     | 452.13  | 2.59 | 0.00 | P     | 123.93  | GNDPA1       | 5q21          |
| 222623_s_at  | 0.98 | 0.91 | P     | 345.47  | 2.59 | 0.00 | P     | 883.93  | ANC_2H01     | 3q27.1        |
| 238609_at    | 1.00 | 0.99 | P     | 47.83   | 2.59 | 0.01 | P     | 122.17  |              |               |
| 238557_at    | 0.99 | 0.91 | A     | 29.93   | 2.59 | 0.02 | P     | 76.70   |              |               |
| 1556082_a_at | 0.99 | 0.94 | A     | 15.27   | 2.59 | 0.00 | P.M.A | 39.00   |              |               |
| 203950_s_at  | 1.00 | 0.99 | P     | 324.20  | 2.59 | 0.00 | P     | 825.23  | GPS2         | 17p13         |
| 221535_at    | 1.00 | 0.99 | P     | 249.60  | 2.59 | 0.00 | P     | 634.93  | FLJ11301     | 3q29          |
| 200961_at    | 1.00 | 0.98 | P     | 519.33  | 2.59 | 0.00 | P     | 1322.23 | SEPHS2       | 16p12.1       |
| 227562_at    | 1.00 | 0.97 | P     | 56.63   | 2.59 | 0.01 | P     | 144.63  | MAP2K1IP1    | 4q23          |
| 223296_at    | 1.00 | 0.98 | P     | 263.00  | 2.59 | 0.00 | P     | 666.43  | MGC4399      | 1p36.22       |
| 238619_at    | 1.00 | 0.95 | P     | 36.40   | 2.59 | 0.03 | P     | 94.17   |              |               |
| 226276_at    | 0.99 | 0.93 | P     | 1116.30 | 2.58 | 0.00 | P     | 2851.00 | MGC23909     | 5q14.2        |
| 1555870_at   | 1.00 | 0.96 | P     | 123.87  | 2.58 | 0.00 | P     | 315.43  | FLJ32096     | 1p36.23       |
| 201881_s_at  | 0.98 | 0.91 | P     | 117.50  | 2.58 | 0.00 | P     | 301.07  | ARIH1        | 15q24         |
| 219143_s_at  | 1.00 | 0.96 | P.A   | 191.80  | 2.58 | 0.00 | P     | 488.17  | RFP25        | 15q23         |
| 213374_x_at  | 1.00 | 0.96 | P     | 334.20  | 2.58 | 0.00 | P     | 123.73  | HIBCH        | 2q32.3        |
| 227188_at    | 0.99 | 0.93 | P     | 55.23   | 2.58 | 0.02 | P     | 140.93  | C21orf63     | 21q22.11      |
| 223538_at    | 1.00 | 0.97 | P     | 308.43  | 2.58 | 0.00 | P     | 783.17  | SERF1A       | 3q12.2-q13.3  |
| 213447_at    | 0.99 | 0.92 | P     | 68.13   | 2.58 | 0.02 | P     | 176.30  | IPW          | 15q11-q12     |
| 203628_at    | 0.99 | 0.94 | M.A   | 105.97  | 2.58 | 0.01 | P     | 269.90  | IGF1R        | 15q26.3       |
| 202526_at    | 1.00 | 0.96 | A     | 12.97   | 2.58 | 0.00 | P     | 33.07   | SMAD4        | 3q21.1        |
| 40020_at     | 0.99 | 0.92 | P     | 66.53   | 2.58 | 0.01 | P     | 169.67  | CELSR3       | 3p24.1-p21.2  |
| 203150_at    | 1.00 | 0.99 | P     | 242.93  | 2.58 | 0.00 | P     | 615.97  | RAB9P40      | 9q34.11       |
| 210983_s_at  | 1.00 | 0.98 | P.A   | 854.97  | 2.58 | 0.00 | P     | 2180.80 | MCM7         | 7q21.3-q22.1  |
| 222447_at    | 1.00 | 0.99 | P     | 309.10  | 2.58 | 0.00 | P     | 783.80  | DREV1        | 16p13-p12     |
| 227936_at    | 1.00 | 0.96 | P     | 159.60  | 2.57 | 0.00 | P     | 428.07  | FLJ32370     | 8p11.23       |
| 204929_s_at  | 1.00 | 0.98 | P.A   | 48.67   | 2.57 | 0.01 | P     | 123.73  | VAMP5        | 2p11.2        |
| 214564_s_at  | 1.00 | 0.97 | A     | 71.17   | 2.57 | 0.01 | P     | 182.07  | PCDHGC3      | 5q31          |
| 208700_s_at  | 1.00 | 0.97 | P     | 1518.67 | 2.57 | 0.00 | P     | 3849.47 | TKT          | 3p14.3        |
| 203201_at    | 0.99 | 0.93 | P.A   | 80.60   | 2.57 | 0.00 | P     | 203.17  | PM2          | 6p13.3-p13.2  |
| 219239_s_at  | 1.00 | 0.96 | A     | 154.00  | 2.57 | 0.00 | P.A   | 122.97  | FLJ10997     | 3p12.1        |
| 221504_s_at  | 1.00 | 0.97 | P     | 291.83  | 2.57 | 0.02 | P     | 746.17  | ATP6V1H      | 8p22-q22.3    |
| 202111_at    | 0.98 | 0.91 | P     | 301.73  | 2.57 | 0.00 | P     | 766.67  | SLC4A2       | 7q35-q36      |
| 238960_s_at  | 0.98 | 0.90 | P.A   | 25.47   | 2.57 | 0.01 | P     | 65.13   | LOC113251    | 12q13.12      |
| 218108_at    | 1.00 | 0.95 | P     | 344.70  | 2.57 | 0.00 | P     | 872.70  | C14orf130    | 14q32.13      |
| 241495_at    | 1.00 | 0.96 | P.M   | 154.00  | 2.57 | 0.00 | P     | 41.53   | CONL1        | 8p11.23       |
| 226805_at    | 1.00 | 0.96 | P     | 210.33  | 2.57 | 0.00 | P     | 532.43  | C20orf142    | 20q13.12      |
| 224521_s_at  | 0.99 | 0.95 | P     | 66.07   | 2.56 | 0.00 | P     | 166.50  | MGC13183     | 12p13.33      |
| 203635_at    | 0.99 | 0.93 | P     | 361.37  | 2.56 | 0.00 | P     | 914.37  | DSCR3        | 21q22.2       |
| 202313_at    | 0.99 | 0.92 | P     | 407.07  | 2.56 | 0.00 | P     | 1029.53 | PPRP22A      | 8p21.1        |
| 201822_at    | 0.99 | 0.94 | P     | 360.33  | 2.56 | 0.00 | P     | 904.77  | SND1         | 7q31.3        |
| 206501_x_at  | 1.00 | 0.98 | P.A   | 53.93   | 2.56 | 0.00 | P     | 135.93  | ETV1         | 7p22          |
| 230521_at    | 0.99 | 0.95 | P     | 173.83  | 2.56 | 0.01 | P     | 443.20  | C9orf100     | 9p13.2        |
| 1557352_at   | 1.00 | 0.96 | P.A   | 13.07   | 2.56 | 0.00 | P     | 33.07   | SOLE         | 8q24.1        |
| 218897_at    | 1.00 | 0.96 | P     | 144.40  | 2.56 | 0.00 | P     | 364.17  | MGC10593     | 2q14.3        |
| 202811_s_at  | 1.00 | 0.96 | P     | 154.00  | 2.56 | 0.00 | P     | 388.80  | CRSP2        | 2q11.4-p11.2  |
| 1559759_at   | 1.00 | 0.97 | A     | 68.53   | 2.56 | 0.02 | P     | 173.70  | KIFC3        | 16p13-q21     |
| 212685_s_at  | 1.00 | 0.95 | P     | 374.70  | 2.56 | 0.00 | P     | 940.67  | TBL2         | 7q11.23       |
| 33760_at     | 1.00 | 0.97 | P     | 144.20  | 2.56 | 0.00 | P     | 362.07  | PEX14        | 1p36.22       |
| 208101_s_at  | 1.00 | 0.96 | P     | 281.17  | 2.56 | 0.00 | P     | 710.17  | C9orf74      | 9q34.13       |
| 1554456_a_at | 1.00 | 0.96 | P.A   | 493.70  | 2.56 | 0.00 | P     | 221.80  | WINS1        | 15q26.3       |
| 225876_at    | 0.99 | 0.94 | P     | 217.73  | 2.55 | 0.01 | P     | 547.50  | DJ462023.D36 | 12-p35.1      |
| 223039_at    | 1.00 | 0.97 | P     | 569.00  | 2.55 | 0.00 | P     | 1430.90 | MGC1842      | 22q11.2       |
| 202241_at    | 0.99 | 0.94 | P     | 347.40  | 2.55 | 0.01 | P     | 872.23  | TRIB1        | 8q24.13       |
| 210109_at    | 0.97 | 0.89 | A     | 58.53   | 2.55 | 0.01 | P.A   | 148.47  | NSG-X        | 7q31          |
| 201173_s_at  | 1.00 | 0.96 | P     | 618.80  | 2.55 | 0.00 | P     | 1520.20 | NUDC         | 16p35-p34     |
| 231845_at    | 1.00 | 0.97 | P     | 209.10  | 2.55 | 0.01 | P     | 525.73  | AARSL        | 6p21.1        |
| 216397_s_at  | 0.98 | 0.91 | P.A   | 108.97  | 2.55 | 0.00 | P     | 274.50  | BOP1         | 8q24.3        |
| 200979_at    | 1.00 | 0.96 | P     | 318.77  | 2.55 | 0.00 | P     | 798.80  | PDHA1        | q22.2-p22.1   |
| 242961_at    | 0.99 | 0.92 | P     | 54.50   | 2.55 | 0.00 | P     | 137.30  |              |               |
| 222547_at    | 0.99 | 0.92 | P     | 69.07   | 2.55 | 0.00 | P     | 151.20  |              |               |
| 1555943_at   | 0.99 | 0.93 | A     | 70.07   | 2.54 | 0.00 | P     | 176.17  | MAP4K4       | 2q11.2-q12    |
| 1556321_a_at | 1.00 | 0.98 | P.M   | 68.57   | 2.54 | 0.01 | P     | 171.80  | MGC3552      | 12q24.33      |
| 235123_at    | 1.00 | 0.98 | P     | 94.77   | 2.54 | 0.01 | P     | 238.37  |              |               |
| 237464_at    | 0.99 | 0.94 | P     | 44.63   | 2.54 | 0.00 | P     | 111.60  | IMAA         | 16p12         |
| 222912_at    | 0.99 | 0.93 | P     | 92.40   | 2.54 | 0.00 | P     | 230.50  | ARRB1        | 11q13         |
| 200866_s_at  | 0.99 | 0.93 | P     | 817.93  | 2.54 | 0.00 | P     | 2051.20 | PSAP         | 10q21-q22     |
| 215905_s_at  | 0.98 | 0.90 | P.A   | 151.47  | 2.54 | 0.00 | P     | 380.83  | HPRP8BP      | 1p35.1        |
| 218273_s_at  | 1.00 | 0.96 | P     | 154.10  | 2.54 | 0.01 | P     | 387.90  | PPM2C        | 8q22.1        |
| 219137_s_at  | 1.00 | 0.95 | P     | 409.57  | 2.54 | 0.00 | P     | 1026.83 | GLD04        | 2q36.3        |
| 203451_at    | 0.99 | 0.94 | A     | 75.10   | 2.54 | 0.01 | P.M.A | 187.50  | LDB1         | 10q24-q25     |
| 226968_at    | 1.00 | 0.96 | P     | 96.23   | 2.54 | 0.01 | P     | 241.90  | KIF1B        | 1p36.2        |
| 219112_at    | 0.99 | 0.93 | P.A   | 44.43   | 2.53 | 0.01 | P     | 110.73  | RAPGEF6      | 5q31.1        |
| 209237_s_at  | 0.98 | 0.90 | A     | 48.93   | 2.53 | 0.01 | P.A   | 123.07  | SLC23A2      | 20p13         |
| 242008_at    | 0.99 | 0.93 | P     | 25.47   | 2.53 | 0.01 | P     | 63.73   |              |               |
| 203775_at    | 1.00 | 0.98 | P     | 493.70  | 2.53 | 0.00 | P     | 1230.20 |              |               |
| 209811_at    | 0.99 | 0.93 | P.A   | 71.20   | 2.53 | 0.00 | P     | 178.73  | SLC25A13     | 7q21.3        |
| 236292_at    | 0.99 | 0.94 | P     | 77.40   | 2.53 | 0.00 | P     | 192.13  | CASP2        | 7q34-q35      |
| 221482_s_at  | 1.00 | 0.96 | P     | 478.53  | 2.53 | 0.00 | P     | 1195.37 | ARPP-19      | 15q21.1       |
| 209420_s_at  | 1.00 | 0.96 | M.A   | 146.80  | 2.53 | 0.00 | P     | 365.07  | SMPD1        | 1p15.4-p15.1  |
| 225837_at    | 1.00 | 0.99 | P     | 178.57  | 2.53 | 0.00 | P     | 431.60  | MGC13204     | 12p13.33      |
| 239288_at    | 0.99 | 0.94 | A     | 23.33   | 2.53 | 0.00 | P     | 57.87   | TNIK         | 3q26.31       |
| 238320_at    | 0.98 | 0.89 | P.A   | 69.27   | 2.53 | 0.01 | P     | 174.83  | TncRNA       | 11q13.1       |
| 229712_at    | 0.99 | 0.92 | P.A   | 29.90   | 2.53 | 0.00 | P     | 74.73   | SNAPC3       | 9p22.2        |
| 239439_at    | 0.98 | 0.90 | P.A   | 43.90   | 2.53 | 0.03 | P     | 112.33  | AF5Q31       | 5q31          |
| 226656_at    | 0.99 | 0.95 | P     | 281.47  | 2.53 | 0.01 | P     | 701.83  |              |               |
| 208878_s_at  | 1.00 | 0.98 | P     | 231.83  | 2.52 | 0.00 | P     | 574.90  | PAK2         | 3q29          |
| 244519_at    | 1.00 | 0.98 | P.M   | 158.00  | 2.52 | 0.00 | P     | 392.00  | ASXL1        | 20q11.1       |
| 220032_at    | 1.00 | 0.95 | P     | 75.80   | 2.52 | 0.00 | P     | 188.03  | FLJ21986     | 7q31.32       |
| 203883_s_at  | 1.00 | 0.99 | P     | 160.50  | 2.52 | 0.01 | P     | 398.93  | Rab11-FIP2   | 10q26.12      |
| 203452_at    | 0.98 | 0.89 | P.A   | 142.93  | 2.52 | 0.00 | P     | 356.63  | B3GAT3       | 11q12.3       |
| 235234_at    | 0.98 | 0.91 | P.M.A | 80.13   | 2.52 | 0.00 | P     | 200.17  | FLJ36874     | 11q12.2       |
| 204015_s_at  | 0.99 | 0.93 | P     | 347.90  | 2.52 | 0.00 | P     | 864.37  | DUSP4        | 8p12-p11      |
| 240146_at    | 0.97 | 0.89 | P     | 27.03   | 2.52 | 0.01 | P     | 67.47   | CAPZA2       | 7q31.2-q31.3  |
| 207265_s_at  | 0.99 | 0.93 | P     | 224.37  | 2.52 | 0.01 | P     | 561.90  | KDELR3       | 22q13.1       |
| 200972_at    | 0.99 | 0.92 | P     | 805.27  | 2.52 | 0.00 | P     | 2001.87 | TMSF8        | 15q21         |
| 218300_at    | 0.99 | 0.92 | P.A   | 162.17  | 2.52 | 0.01 | P     | 402.50  | MGC4606      | 16p12.1       |
| 204761_at    | 0.99 | 0.92 | P     | 107.10  | 2.52 | 0.00 | P     | 266.23  | USP6NL       | 10p13         |
| 204849_at    | 1.00 | 0.99 | P     | 227.37  | 2.52 | 0.00 | P     | 563.03  | TCFL5        | 20q13.3-pter  |
| 230077_at    | 0.98 | 0.91 | P     | 37.10   | 2.51 | 0.01 | P     | 92.73   | LOC255812    | 3q29          |
| 224859_at    | 1.00 | 0.96 | P     | 176.87  | 2.51 | 0.01 | P     | 442.07  | B7H5         | 15q23-q24     |
| 235949_at    | 1.00 | 0.98 | P     | 38.37   | 2.51 | 0.01 | P     | 95.43   |              |               |
| 216088_s_at  | 1.00 | 0.99 | P     | 493.00  | 2.51 | 0.01 | P     | 1223.00 | PSMA7        | 20q13.33      |
| 200987_x_at  | 0.99 | 0.93 | P.A   | 424.67  | 2.51 | 0.00 | P     | 1056.17 | PSME3        | 17q21         |
| 211961_s_at  | 1.00 | 1.00 | P     | 975.47  | 2.51 | 0.00 | P     | 2406.50 | RAB7         | 3q21.3        |
| 202661_at    | 0.99 | 0.94 | P.A   | 25.30   | 2.51 | 0.00 | P     | 62.27   | ITPR2        | 12p11         |
| 218456_at    | 1.00 | 0.94 | P     | 117.03  | 2.51 | 0.00 | P     | 289.60  | C1QDC1       | 12p11         |
| 214074_s_at  | 0.99 | 0.95 | P     | 175.03  | 2.51 | 0.00 | P     | 433.83  | EMS1         | 11q13         |
| 208626_s_at  | 1.00 | 0.95 | P     | 1138.50 | 2.51 | 0.00 | P     | 2805.13 | VAT1         | 17q21         |
| 203665_at    | 0.99 | 0.94 | P.A   | 64.33   | 2.50 | 0.00 | P     | 159.10  | BCL2         | 10q26.13      |
| 204014_at    | 1.00 | 0.99 | P     | 117.10  | 2.50 | 0.00 | P     | 477.70  | DUSP4        | 8p12-p11      |
| 209568_s_at  | 1.00 | 0.96 | P     | 111.17  | 2.50 | 0.00 | P     | 272.83  | RGL1         | 1q25.2        |
| 222045_s_at  | 0.98 | 0.90 | P.A   | 52.93   | 2.50 | 0.01 | P     | 132.63  | C20orf67     | 20q13.12      |
| 228889_at    | 0.99 | 0.92 | A     | 46.10   | 2.50 | 0.00 | P.A   | 113.17  | C14orf128    | 14q13.1       |
| 216222_s_at  | 0.98 | 0.90 | P     | 160.67  | 2.50 | 0.02 |       |         |              |               |

|              |      |      |     |         |      |      |     |         |            |                |
|--------------|------|------|-----|---------|------|------|-----|---------|------------|----------------|
| 203636_at    | 1.00 | 0.99 | P   | 228.57  | 2.49 | 0.00 | P   | 559.73  | MID1       | xp22           |
| 243613_at    | 0.98 | 0.91 | P   | 12.80   | 2.49 | 0.01 | P   | 31.43   | MGC24039   | 12p11.22       |
| 228562_at    | 1.00 | 0.96 | P   | 157.10  | 2.49 | 0.01 | P   | 386.20  | ZBTB10     | 8q13-q21.1     |
| 202529_at    | 0.99 | 0.95 | P   | 234.83  | 2.49 | 0.00 | P   | 685.03  | GALE       | 1p36-p35       |
| 209780_at    | 1.00 | 0.97 | P   | 383.23  | 2.49 | 0.01 | P   | 941.03  | PHTF2      | 7q11.23-q21    |
| 220123_at    | 0.98 | 0.90 | A   | 17.37   | 2.49 | 0.02 | PA  | 43.13   | SLC35F5    | 2q14.1         |
| 211051_s_at  | 0.99 | 0.93 | MA  | 55.03   | 2.49 | 0.01 | P   | 136.50  | EXTL3      | 8p21           |
| 224740_at    | 1.00 | 0.96 | P   | 812.70  | 2.49 | 0.00 | P   | 1991.53 |            |                |
| 237145_at    | 0.99 | 0.91 | PA  | 28.57   | 2.49 | 0.01 | P   | 69.67   | EIF2AK4    | 15q14          |
| 232415_at    | 1.00 | 0.97 | A   | 10.43   | 2.49 | 0.00 | PA  | 25.57   | PCDH13     | 5q31           |
| 1553193_at   | 1.00 | 0.95 | PA  | 19.53   | 2.49 | 0.02 | P   | 48.70   | ZNF441     | 19p13.2        |
| 230369_at    | 1.00 | 0.96 | P   | 52.70   | 2.49 | 0.00 | P   | 129.73  | GPR161     | 1q23.3         |
| 207439_s_at  | 0.98 | 0.91 | P   | 93.33   | 2.49 | 0.00 | P   | 229.63  | SLC35A2    | 11p12.3-p11.22 |
| 212839_s_at  | 0.98 | 0.89 | P   | 38.40   | 2.48 | 0.01 | P   | 94.67   | SSA2       | 1q31           |
| 223954_x_at  | 0.98 | 0.90 | PA  | 146.50  | 2.48 | 0.00 | P   | 360.50  | APBA2BP    | 20q11.22       |
| 206132_at    | 1.00 | 0.98 | PA  | 136.93  | 2.48 | 0.01 | P   | 338.43  | MCC        | 5q21-q22       |
| 213391_at    | 0.99 | 0.92 | P   | 136.23  | 2.48 | 0.00 | P   | 334.13  | LOC286148  | 8q22.1         |
| 204352_at    | 1.00 | 0.95 | P   | 85.30   | 2.48 | 0.01 | P   | 208.67  | TRAF5      | 1q32           |
| 1555864_s_at | 1.00 | 0.99 | P   | 1005.97 | 2.48 | 0.00 | P   | 2456.00 | PDHA1      | 6q22.2-q22.1   |
| 243372_at    | 1.00 | 0.95 | A   | 58.53   | 2.48 | 0.00 | PM  | 142.47  | HSPD1      | 2q33.1         |
| 214670_at    | 1.00 | 0.96 | P   | 246.00  | 2.48 | 0.01 | P   | 602.30  | ZNF36      | 7q21.3-q22.1   |
| 204841_s_at  | 0.99 | 0.94 | P   | 35.40   | 2.48 | 0.00 | P   | 86.97   | EEA1       | 12q22          |
| 222668_at    | 1.00 | 0.96 | P   | 142.13  | 2.48 | 0.00 | P   | 347.67  | KCTD15     | 19q13.12       |
| 213836_s_at  | 0.99 | 0.94 | P   | 328.30  | 2.48 | 0.00 | P   | 797.70  | FLJ10065   | 17q24.3        |
| 226268_at    | 0.99 | 0.92 | PA  | 63.70   | 2.48 | 0.00 | P   | 155.13  | RAB21      | 12q15          |
| 209003_at    | 1.00 | 0.99 | P   | 574.87  | 2.48 | 0.00 | P   | 1402.33 | SLC25A11   | 17p13.3        |
| 212721_at    | 1.00 | 0.95 | P   | 317.80  | 2.48 | 0.01 | P   | 778.00  | SFRS12     | 5q12.3         |
| 210868_s_at  | 0.98 | 0.91 | P   | 85.23   | 2.48 | 0.01 | P   | 209.57  | ELOVL6     | 4q25           |
| 209466_s_at  | 0.98 | 0.89 | A   | 349.80  | 2.48 | 0.00 | P   | 340.50  | PTN        | 7q33-q34       |
| 212196_at    | 1.00 | 0.95 | P   | 123.90  | 2.48 | 0.00 | P   | 302.60  |            |                |
| 232592_at    | 1.00 | 0.95 | A   | 31.27   | 2.47 | 0.01 | P   | 76.47   |            |                |
| 241478_at    | 1.00 | 0.96 | PA  | 26.73   | 2.47 | 0.01 | P   | 65.60   | FLJ23471   | 7p22.3         |
| 1555736_a_at | 1.00 | 0.96 | P   | 145.43  | 2.47 | 0.00 | P   | 354.80  | AGTRAP     | 1p36.21        |
| 209404_s_at  | 0.98 | 0.90 | P   | 306.60  | 2.47 | 0.00 | P   | 758.60  | CGI-109    | 4q21           |
| 1554352_s_at | 1.00 | 0.96 | A   | 63.17   | 2.47 | 0.00 | P   | 154.03  | IRLB       | 15q22.2        |
| 226710_at    | 1.00 | 0.98 | P   | 325.93  | 2.47 | 0.00 | P   | 791.93  |            |                |
| 222474_s_at  | 0.99 | 0.94 | P   | 830.23  | 2.47 | 0.00 | P   | 2025.60 | TOMM22     | 22q12-q13      |
| 224935_at    | 1.00 | 0.95 | P   | 1016.80 | 2.47 | 0.00 | P   | 2467.87 | EIF2S3     | 10p22.2-p22.1  |
| 223975_at    | 1.00 | 0.95 | PMA | 10.80   | 2.47 | 0.00 | P   | 65.03   | FUT10      | 8p12           |
| 219281_at    | 1.00 | 0.98 | P   | 185.53  | 2.47 | 0.00 | P   | 450.83  | MSRA       | 8p23.1         |
| 216381_x_at  | 1.00 | 0.97 | PM  | 153.80  | 2.47 | 0.00 | P   | 374.80  | AKR7A2     | p35.1-p36.23   |
| 235926_at    | 0.98 | 0.90 | P   | 94.43   | 2.47 | 0.02 | P   | 230.40  | ANAPC5     | 12q24.31       |
| 225069_at    | 0.99 | 0.93 | P   | 190.17  | 2.47 | 0.01 | P   | 461.30  |            |                |
| 219164_s_at  | 1.00 | 0.96 | P   | 66.53   | 2.47 | 0.01 | P   | 137.07  |            |                |
| 235725_at    | 0.99 | 0.95 | PM  | 33.57   | 2.46 | 0.01 | P   | 81.70   | C14orf103  | 14q32.31       |
| 239170_at    | 0.99 | 0.92 | P   | 62.07   | 2.46 | 0.00 | P   | 151.50  |            |                |
| 240118_at    | 0.98 | 0.91 | A   | 11.80   | 2.46 | 0.02 | PA  | 29.07   |            |                |
| 225972_at    | 1.00 | 0.98 | P   | 54.77   | 2.46 | 0.00 | P   | 132.33  | IFZp762C11 | 8q21.3         |
| 227357_at    | 1.00 | 0.96 | P   | 340.13  | 2.46 | 0.01 | P   | 824.43  | TAB3       | 4q21.3         |
| 230737_s_at  | 0.99 | 0.94 | P   | 30.87   | 2.46 | 0.01 | P   | 74.53   | SVIL       | 10p11.2        |
| 203867_s_at  | 1.00 | 0.97 | A   | 166.93  | 2.46 | 0.00 | PM  | 403.33  | FLJ10458   | 17q21.1        |
| 203843_at    | 1.00 | 0.95 | PM  | 185.17  | 2.46 | 0.00 | P   | 447.23  | RP56KA3    | 10p22.2-p22.1  |
| 241936_x_at  | 1.00 | 0.95 | A   | 24.40   | 2.46 | 0.01 | P   | 59.13   |            |                |
| 227636_at    | 1.00 | 0.98 | P   | 226.23  | 2.46 | 0.00 | P   | 642.67  |            |                |
| 227386_at    | 1.00 | 0.98 | P   | 94.10   | 2.46 | 0.00 | P   | 226.97  | THAP5      | 7q22.3         |
| 211713_x_at  | 1.00 | 0.97 | P   | 462.93  | 2.45 | 0.01 | P   | 1122.50 | KIAA0779   | 3q21.3         |
| 228049_x_at  | 0.99 | 0.92 | P   | 901.73  | 2.45 | 0.00 | P   | 2167.80 | KIAA0101   | 15q22.1        |
| 1556180_at   | 1.00 | 0.95 | P   | 79.20   | 2.45 | 0.01 | P   | 193.40  | LOC255458  | 5q35.3         |
| 223917_s_at  | 0.99 | 0.93 | PA  | 64.50   | 2.45 | 0.00 | P   | 957.33  | SLC39A3    | 19p13.3        |
| 213623_at    | 0.99 | 0.92 | P   | 158.53  | 2.45 | 0.00 | P   | 384.20  | KIF3A      | 5q31           |
| 212439_at    | 1.00 | 0.98 | PM  | 172.83  | 2.45 | 0.00 | P   | 417.10  | IHPK1      | 3p21.31        |
| 222685_at    | 1.00 | 0.98 | P   | 294.73  | 2.45 | 0.01 | P   | 713.27  | FAM29A     | 9p22.1         |
| 218695_at    | 0.99 | 0.93 | P   | 350.87  | 2.45 | 0.01 | P   | 845.23  | EXOSC4     | 8q24.3         |
| 232899_at    | 0.98 | 0.91 | PMA | 48.50   | 2.45 | 0.00 | P   | 117.80  | EIF5A2     | 3q25.2         |
| 243452_at    | 1.00 | 0.96 | A   | 50.10   | 2.45 | 0.00 | P   | 120.57  | B4GALT6    | 18q11          |
| 225127_at    | 1.00 | 0.98 | P   | 298.83  | 2.45 | 0.01 | P   | 724.50  | KIAA1423   | 6q25.3         |
| 213194_at    | 1.00 | 0.98 | P   | 377.27  | 2.45 | 0.00 | P   | 907.63  | ROBO1      | 3p12           |
| 1554062_at   | 0.99 | 0.94 | PA  | 18.93   | 2.45 | 0.02 | P   | 46.03   | XG         | xp22.33        |
| 1552631_a_at | 1.00 | 0.99 | A   | 32.10   | 2.45 | 0.00 | P   | 77.43   | MAP3K6     | 10q55.3        |
| 226524_at    | 0.99 | 0.93 | PA  | 99.73   | 2.45 | 0.00 | P   | 240.80  | MGC26717   | 3p12.1         |
| 219637_at    | 1.00 | 0.98 | P   | 92.80   | 2.45 | 0.01 | P   | 224.20  | FLJ12584   | 2q37.1         |
| 225204_at    | 1.00 | 0.97 | P   | 346.97  | 2.44 | 0.00 | P   | 834.33  | TA-PP2C    | 12q24.13       |
| 203093_s_at  | 0.99 | 0.92 | P   | 230.47  | 2.44 | 0.00 | P   | 595.33  | TIMM44     | 9p13.3-p13.2   |
| 221007_s_at  | 1.00 | 0.96 | P   | 166.20  | 2.44 | 0.01 | P   | 352.90  | FIRP11     | 4q12           |
| 202317_s_at  | 0.99 | 0.95 | P   | 202.60  | 2.44 | 0.00 | P   | 486.93  | UBE4B      | 1p36.3         |
| 1558733_at   | 0.98 | 0.89 | PM  | 97.77   | 2.44 | 0.00 | P   | 236.67  | FLJ35036   | 3q23           |
| 209300_s_at  | 0.99 | 0.94 | P   | 247.23  | 2.44 | 0.00 | P   | 594.13  | KFPZP568B1 | 12p13.31       |
| 202610_s_at  | 0.98 | 0.90 | P   | 234.83  | 2.44 | 0.00 | P   | 566.77  | CRSP2      | 10q11.4-p11.2  |
| 239105_at    | 1.00 | 0.96 | P   | 170.27  | 2.44 | 0.01 | P   | 410.13  | LOC340891  | Xp22.1         |
| 236259_at    | 1.00 | 0.99 | P   | 201.73  | 2.44 | 0.00 | P   | 485.90  | STK4       | 0q11.2-q13.2   |
| 233946_at    | 0.99 | 0.94 | PA  | 29.00   | 2.44 | 0.00 | P   | 69.70   | SMU-1      | 9p12           |
| 215920_s_at  | 0.97 | 0.88 | MA  | 29.73   | 2.43 | 0.02 | PA  | 72.70   | LOC283970  | 16q22.1        |
| 204835_at    | 1.00 | 0.97 | P   | 228.87  | 2.43 | 0.00 | P   | 549.50  | POLA       | 10p22.1-p21.3  |
| 242838_at    | 0.99 | 0.93 | P   | 44.50   | 2.43 | 0.01 | P   | 105.87  | FLJ12748   | 8p21.3         |
| 210574_s_at  | 1.00 | 0.98 | P   | 518.40  | 2.43 | 0.00 | P   | 1240.53 | NUDC       | 1p35-p34       |
| 224707_at    | 1.00 | 0.95 | P   | 537.63  | 2.43 | 0.00 | P   | 1289.23 | ORF1-FL49  | 5q31.3         |
| 205452_at    | 0.99 | 0.94 | P   | 315.10  | 2.43 | 0.00 | P   | 758.03  | PIGB       | 15q21-q22      |
| 236105_at    | 1.00 | 0.98 | PM  | 16.90   | 2.43 | 0.00 | P   | 40.43   |            |                |
| 202943_s_at  | 0.99 | 0.93 | P   | 171.07  | 2.43 | 0.00 | P   | 407.43  |            |                |
| 233405_at    | 0.99 | 0.95 | P   | 20.23   | 2.43 | 0.03 | P   | 48.90   | NAGA       | 22q11          |
| 215210_s_at  | 1.00 | 0.97 | P   | 249.60  | 2.43 | 0.00 | P   | 598.63  | DLST       | 14q24.3        |
| 244498_x_at  | 0.99 | 0.92 | A   | 38.17   | 2.43 | 0.00 | P   | 91.37   | FLJ43276   | 15q25.2        |
| 201203_s_at  | 0.98 | 0.90 | PMA | 104.33  | 2.43 | 0.00 | P   | 250.57  | RRP1       | 20p12          |
| 203837_s_at  | 0.99 | 0.94 | P   | 88.27   | 2.43 | 0.00 | P   | 680.57  | MID1       | 10q22          |
| 221041_s_at  | 0.99 | 0.94 | P   | 284.63  | 2.42 | 0.00 | P   | 679.23  | SLC17A5    | 6q14-q15       |
| 201618_x_at  | 1.00 | 0.99 | PA  | 347.73  | 2.42 | 0.01 | P   | 829.90  | GPAA1      | 8q24.3         |
| 201061_s_at  | 1.00 | 0.96 | P   | 363.63  | 2.42 | 0.00 | P   | 868.40  | STOM       | 9q34.1         |
| 242787_at    | 1.00 | 0.97 | P   | 146.67  | 2.42 | 0.00 | P   | 351.00  | INCENP     | 11q12-q13      |
| 214895_at    | 1.00 | 0.96 | P   | 85.40   | 2.42 | 0.00 | P   | 203.33  | NICE-4     | 1q22           |
| 236700_at    | 1.00 | 0.97 | P   | 41.70   | 2.42 | 0.02 | P   | 100.13  | EIF3S8     | 16p11.2        |
| 56919_at     | 0.99 | 0.93 | P   | 53.23   | 2.42 | 0.01 | P   | 127.07  | GORASP1    | 3p22-p21.33    |
| 227452_at    | 1.00 | 0.97 | P   | 270.33  | 2.42 | 0.00 | P   | 641.87  |            |                |
| 1569190_at   | 1.00 | 0.97 | PA  | 53.17   | 2.42 | 0.00 | P   | 126.63  | FLJ30655   | 4q28.2         |
| 212887_at    | 1.00 | 0.96 | P   | 415.13  | 2.42 | 0.01 | P   | 991.97  | SEC23A     | 4q13.3         |
| 218465_at    | 1.00 | 0.99 | P   | 348.97  | 2.42 | 0.00 | P   | 828.90  | FLJ10525   | 4p14           |
| 210813_s_at  | 0.99 | 0.94 | P   | 90.80   | 2.41 | 0.01 | P   | 216.57  | XRCC4      | 5q13-q14       |
| 240344_x_at  | 1.00 | 0.99 | P   | 121.73  | 2.41 | 0.01 | P   | 289.60  | LOC90624   | 5q31.1         |
| 241595_at    | 0.99 | 0.93 | A   | 26.17   | 2.41 | 0.01 | PMA | 62.03   |            |                |
| 201954_at    | 1.00 | 1.00 | P   | 1566.53 | 2.41 | 0.00 | P   | 3707.50 | ARPC1B     | 7q22.1         |
| 218852_at    | 1.00 | 1.00 | P   | 205.10  | 2.41 | 0.00 | P   | 486.23  | C14orf10   | 14q13.2        |
| 222979_s_at  | 0.98 | 0.91 | P   | 699.83  | 2.41 | 0.00 | P   | 1671.30 | SURF4      | 9q34.2         |
| 201664_at    | 0.99 | 0.95 | P   | 927.13  | 2.41 | 0.00 | P   | 2202.43 | SMC4L1     | 3q26.1         |
| 32502_at     | 0.99 | 0.94 | P   | 130.87  | 2.41 | 0.01 | P   | 310.03  | PPP1R65    | 11q13.3        |
| 222625_s_at  | 0.98 | 0.90 | P   | 65.23   | 2.41 | 0.01 | P   | 131.53  | NDE1       | 16p13.11       |
| 244661_at    | 0.99 | 0.95 | P   | 56.70   | 2.41 | 0.02 | P   | 135.30  |            |                |
| 214989_x_at  | 0.98 | 0.91 | P   | 183.97  | 2.41 | 0.02 | P   | 438.93  | PEPP2      | 12p12          |
| 202030_at    | 1.00 | 0.97 | P   | 176.77  | 2.40 | 0.00 | P   | 417.63  | BCKDK      | 16p11.2        |
| 223946_at    | 0.99 | 0.94 | A   | 14.83   | 2.40 | 0.03 | PA  | 35.77   | NES        | 1q21.1         |
| 1554915_a_at | 0.98 | 0.90 |     |         |      |      |     |         |            |                |

|              |      |      |      |         |      |      |      |         |           |               |
|--------------|------|------|------|---------|------|------|------|---------|-----------|---------------|
| 202993_at    | 1.00 | 0.98 | P    | 500.67  | 2.39 | 0.00 | P    | 1178.17 | ILVBL     | 19p13.1       |
| 1570566_at   | 0.99 | 0.91 | PA   | 22.13   | 2.39 | 0.01 | P    | 52.23   |           |               |
| 241396_at    | 1.00 | 0.99 | A    | 87.33   | 2.39 | 0.01 | P    | 206.63  | NEDD4L    | 18q21         |
| 228939_at    | 0.99 | 0.92 | A    | 142.47  | 2.39 | 0.01 | P    | 336.37  | CFEB2     | 4p15.33       |
| 223487_x_at  | 0.99 | 0.93 | P    | 172.90  | 2.39 | 0.01 | P    | 410.33  | GNB4      | 3q27.1        |
| 225685_at    | 1.00 | 0.96 | P    | 596.90  | 2.38 | 0.01 | P    | 1401.23 |           |               |
| 225738_at    | 1.00 | 0.96 | P    | 164.67  | 2.38 | 0.00 | P    | 388.90  | RAPGEF1   | 9q34.3        |
| 201030_x_at  | 1.00 | 0.97 | P    | 2376.17 | 2.38 | 0.00 | P    | 5611.20 | LDHB      | 2p12.2-p12.1  |
| 235760_at    | 1.00 | 0.98 | A    | 24.80   | 2.38 | 0.01 | PM   | 81.67   | PRKACB    | 1p36.1        |
| 203621_at    | 1.00 | 0.97 | P    | 1192.90 | 2.38 | 0.00 | P    | 2802.13 | NDUFB5    | 3q27.1        |
| 231094_s_at  | 1.00 | 0.95 | PA   | 68.23   | 2.38 | 0.02 | P    | 161.30  | FTFHSDC1  | 6q25.1        |
| 209342_s_at  | 0.99 | 0.93 | PA   | 47.37   | 2.38 | 0.00 | P    | 111.53  | IKBKB     | 8p11.2        |
| 1565697_a_at | 1.00 | 0.95 | A    | 24.70   | 2.38 | 0.02 | P    | 58.27   | LOC284513 | 16p36.13      |
| 239144_at    | 0.98 | 0.90 | A    | 15.37   | 2.38 | 0.01 | PA   | 36.30   | BSGAT2    | 6q13          |
| 241763_s_at  | 1.00 | 0.96 | P    | 40.13   | 2.38 | 0.01 | P    | 94.33   | FBXO32    | 8q24.13       |
| 212214_at    | 0.99 | 0.94 | PA   | 270.93  | 2.38 | 0.00 | P    | 637.37  | OPA1      | 3q28-q29      |
| 239842_x_at  | 0.99 | 0.94 | PA   | 31.13   | 2.38 | 0.00 | P    | 72.70   |           |               |
| 212682_s_at  | 0.98 | 0.91 | A    | 170.20  | 2.38 | 0.02 | P    | 405.63  | BC002942  | 22q13.33      |
| 201512_s_at  | 0.99 | 0.94 | P    | 514.07  | 2.38 | 0.00 | P    | 1207.13 | TOMM70A   | 3q12.3        |
| 203974_at    | 0.99 | 0.91 | P    | 173.60  | 2.38 | 0.00 | P    | 407.47  | FAM16AX   | xp22.32       |
| 224149_x_at  | 0.98 | 0.90 | P    | 82.13   | 2.38 | 0.01 | P    | 194.43  | SLMAP     | 3p21.2-p14.3  |
| 224151_s_at  | 0.99 | 0.93 | P    | 126.03  | 2.38 | 0.00 | P    | 295.70  | AK3L1     | 3p24.1-p24.3  |
| 202550_s_at  | 1.00 | 0.95 | P    | 436.33  | 2.38 | 0.00 | P    | 1021.77 | VAPB      | 20q13         |
| 1554334_a_at | 0.99 | 0.94 | PA   | 17.57   | 2.38 | 0.01 | P    | 41.17   | DNAJ4     | 15q24.1       |
| 218866_s_at  | 0.99 | 0.93 | P    | 453.93  | 2.38 | 0.00 | P    | 1064.13 | POLR3K    | 16p13.3       |
| 226190_at    | 1.00 | 0.98 | P    | 823.20  | 2.38 | 0.00 | P    | 1926.73 |           |               |
| 223290_at    | 0.99 | 0.95 | PM   | 282.97  | 2.38 | 0.00 | P    | 663.17  | PDXP      | 22cen-q12.3   |
| 200863_at    | 0.99 | 0.92 | P    | 776.43  | 2.37 | 0.00 | P    | 1822.43 | UQCRC2    | 16p12         |
| 217595_at    | 1.00 | 0.92 | PA   | 151.53  | 2.37 | 0.00 | P    | 74.73   | GSPT1     | 16p13.1       |
| 238519_at    | 1.00 | 0.96 | P    | 84.90   | 2.37 | 0.00 | P    | 198.47  |           |               |
| 210793_s_at  | 1.00 | 0.97 | P    | 105.73  | 2.37 | 0.00 | P    | 246.70  | NUP98     | 11p15.5       |
| 234132_at    | 0.99 | 0.94 | A    | 35.70   | 2.36 | 0.00 | PA   | 83.40   |           |               |
| 228638_at    | 0.99 | 0.93 | P    | 107.30  | 2.36 | 0.00 | P    | 250.67  | MGC34648  | 1p36.3        |
| 224693_at    | 0.99 | 0.93 | P    | 327.40  | 2.36 | 0.00 | P    | 757.90  | LOC280108 | 20p33.31      |
| 231793_s_at  | 0.99 | 0.94 | P    | 65.50   | 2.36 | 0.00 | P    | 152.53  | CAMK2D    | 4q26          |
| 221550_at    | 0.99 | 0.95 | P    | 99.00   | 2.36 | 0.01 | P    | 232.13  | COX15     | 10q24         |
| 1555041_a_at | 0.99 | 0.95 | A    | 234.50  | 2.36 | 0.02 | P    | 549.50  | NAGA      | 22q11         |
| 202394_s_at  | 1.00 | 0.98 | P    | 129.83  | 2.36 | 0.00 | P    | 301.23  | ABCF3     | 3q27.3        |
| 201976_s_at  | 1.00 | 0.96 | P    | 117.17  | 2.36 | 0.00 | P    | 1816.97 | MYO10     | 3p15-p14.3    |
| 221895_at    | 0.98 | 0.90 | A    | 103.67  | 2.36 | 0.01 | P,MA | 242.90  | MOSPD2    | xp22.31       |
| 239300_at    | 0.99 | 0.94 | P    | 17.70   | 2.35 | 0.01 | P    | 41.23   |           |               |
| 227138_at    | 1.00 | 0.98 | P    | 112.97  | 2.35 | 0.00 | P    | 261.90  | LOC253263 | 3p22.3        |
| 244350_at    | 1.00 | 0.96 | P    | 58.97   | 2.35 | 0.02 | P    | 137.60  |           |               |
| 228713_s_at  | 0.99 | 0.95 | PA   | 57.67   | 2.35 | 0.01 | P    | 134.36  | DHRS10    | 19q13.33      |
| 226888_at    | 0.99 | 0.94 | P    | 85.50   | 2.35 | 0.01 | P    | 197.63  | CSNK1G1   | 1q22.1-q22.31 |
| 224622_at    | 1.00 | 0.97 | P    | 500.10  | 2.35 | 0.00 | P    | 1156.30 | TBC1D14   | 4p16.1        |
| 200737_at    | 0.99 | 0.93 | P    | 1257.53 | 2.35 | 0.00 | P    | 2912.50 | PGK1      | xq13          |
| 225341_at    | 0.99 | 0.91 | A    | 43.13   | 2.35 | 0.00 | P    | 100.40  | LOC80298  | 12q24.1       |
| 238879_at    | 1.00 | 0.96 | P    | 82.80   | 2.35 | 0.00 | P    | 191.37  | RP42      | 3p36.3        |
| 225614_at    | 1.00 | 0.98 | P    | 536.03  | 2.34 | 0.00 | P    | 1237.27 | LOC113174 | 11p15.1       |
| 1568596_a_at | 1.00 | 0.95 | A    | 143.90  | 2.34 | 0.01 | P    | 333.57  | TROAP     | 12q13.12      |
| 230061_at    | 0.99 | 0.91 | A    | 4.83    | 2.34 | 0.01 | PA   | 11.33   | LOC116441 | 3q24          |
| 236834_at    | 1.00 | 0.97 | P    | 95.80   | 2.34 | 0.00 | P    | 220.70  | SCFD2     | 4q12          |
| 216870_x_at  | 1.00 | 0.97 | P    | 142.67  | 2.34 | 0.00 | P    | 330.47  | DLEU2     | 13q14.3       |
| 57703_at     | 0.98 | 0.90 | P    | 58.43   | 2.34 | 0.01 | P    | 135.40  | SENP5     | 3q29          |
| 225663_at    | 1.00 | 0.97 | P    | 405.40  | 2.34 | 0.00 | P    | 934.53  | ACBD5     | 10p12.1       |
| 204593_s_at  | 0.99 | 0.92 | P    | 421.87  | 2.34 | 0.00 | P    | 977.87  | FLJ20232  | 22q13         |
| 225710_at    | 1.00 | 0.99 | P    | 781.90  | 2.34 | 0.00 | P    | 1799.57 |           |               |
| 227847_at    | 1.00 | 0.99 | P    | 133.80  | 2.34 | 0.00 | P    | 423.93  | EPM2A1P1  | 3p22.1        |
| 201637_s_at  | 1.00 | 0.99 | P    | 534.93  | 2.34 | 0.00 | P    | 1229.83 | FXR1      | 3q28          |
| 210042_s_at  | 0.99 | 0.95 | P    | 72.97   | 2.34 | 0.01 | P    | 169.10  | CTS2      | 20q13         |
| 229115_at    | 1.00 | 0.99 | A    | 239.10  | 2.34 | 0.01 | P,MA | 552.23  | DNCH1     | 14q32         |
| 207495_at    | 1.00 | 0.95 | PA   | 29.30   | 2.34 | 0.01 | P    | 67.87   | RAE28     | 4p16.1        |
| 201155_s_at  | 0.99 | 0.93 | P    | 402.93  | 2.34 | 0.01 | P    | 923.03  | MFN2      | 3p36.21       |
| 202168_at    | 0.99 | 0.94 | P    | 647.93  | 2.34 | 0.00 | P    | 1483.77 | TAF9      | 5q11.2-q13.1  |
| 209231_s_at  | 0.98 | 0.91 | P    | 156.73  | 2.34 | 0.01 | P    | 366.77  | MGC3248   | 16p12.3       |
| 203171_s_at  | 0.99 | 0.92 | PA   | 102.13  | 2.34 | 0.00 | P    | 235.63  | KIAA0409  | 11p15.4       |
| 210754_s_at  | 0.99 | 0.93 | P    | 90.50   | 2.34 | 0.00 | P    | 208.97  | LVN       | 8q13          |
| 238731_at    | 1.00 | 0.97 | PA   | 16.90   | 2.34 | 0.00 | P    | 39.17   | SETDB2    | 13q14         |
| 218574_s_at  | 1.00 | 0.98 | P    | 69.90   | 2.33 | 0.00 | P    | 160.47  | LMCD1     | 3p26-p24      |
| 216170_at    | 0.99 | 0.94 | P    | 27.47   | 2.33 | 0.03 | P    | 64.10   |           |               |
| 212895_s_at  | 0.99 | 0.95 | P    | 279.60  | 2.33 | 0.00 | P    | 640.73  | ABR       | 17p13.3       |
| 202235_at    | 0.98 | 0.89 | A    | 25.50   | 2.33 | 0.01 | PA   | 59.17   | SLC16A1   | 1p12          |
| 201336_at    | 1.00 | 0.99 | P    | 627.07  | 2.33 | 0.01 | P    | 1439.37 | VAMP3     | 10p36.23      |
| 200929_at    | 0.99 | 0.92 | P    | 820.43  | 2.33 | 0.00 | P    | 1894.67 | TMP21     | 14q24.3       |
| 201378_s_at  | 1.00 | 0.99 | P    | 487.10  | 2.33 | 0.00 | P    | 1121.97 | NICE-4    | 1q22          |
| 228433_at    | 1.00 | 0.96 | P    | 95.10   | 2.33 | 0.00 | P    | 218.60  | FLJ11236  |               |
| 219361_s_at  | 0.99 | 0.92 | P,MA | 109.07  | 2.33 | 0.02 | P    | 261.63  | FLJ12484  | 15q25.3       |
| 227862_at    | 0.99 | 0.93 | P    | 68.53   | 2.33 | 0.01 | P    | 134.83  |           |               |
| 218493_at    | 1.00 | 0.98 | P    | 555.00  | 2.33 | 0.00 | P    | 1272.67 | C16orf33  | 16p13.3       |
| 218389_s_at  | 0.98 | 0.91 | P    | 425.90  | 2.33 | 0.01 | P    | 984.50  | APH-1A    | p36.13-q31.3  |
| 223963_s_at  | 1.00 | 0.97 | A    | 53.17   | 2.33 | 0.00 | P    | 121.93  | IMP-2     | 3q28          |
| 218962_s_at  | 1.00 | 0.95 | P    | 264.07  | 2.33 | 0.00 | P    | 606.37  | FLJ13576  | 7q31.32       |
| 202344_at    | 0.99 | 0.95 | PA   | 133.40  | 2.33 | 0.00 | P    | 305.69  | HSF1      | 8q24.3        |
| 202246_s_at  | 1.00 | 0.98 | P    | 1042.00 | 2.33 | 0.00 | P    | 2392.57 | CDK4      | 12q14         |
| 243509_at    | 1.00 | 0.98 | P,MA | 45.17   | 2.33 | 0.01 | P    | 103.70  |           |               |
| 217367_s_at  | 1.00 | 0.97 | MA   | 54.47   | 2.33 | 0.01 | P    | 125.07  | ZHX3      | 20q12         |
| 223517_at    | 0.99 | 0.93 | A    | 43.53   | 2.33 | 0.01 | P    | 99.43   | FBX30     | 16p36.21      |
| 227954_at    | 0.99 | 0.94 | P    | 439.57  | 2.33 | 0.01 | P    | 243.73  | LOC162073 | 16p13.11      |
| 201280_s_at  | 0.99 | 0.95 | P    | 129.13  | 2.33 | 0.01 | P    | 295.07  | DAB2      | 5p13          |
| 225756_at    | 0.99 | 0.94 | P    | 287.07  | 2.32 | 0.00 | P    | 658.17  | CSNK1E    | 22q13.1       |
| 226484_at    | 1.00 | 0.99 | PA   | 70.77   | 2.32 | 0.00 | P    | 161.60  | KIAA1190  | 3p21.33       |
| 218430_s_at  | 0.98 | 0.90 | P    | 42.80   | 2.32 | 0.01 | P    | 96.40   | FLJ12994  | 15q21.2       |
| 213263_s_at  | 1.00 | 0.98 | A    | 94.83   | 2.32 | 0.00 | P    | 216.53  | PCBP2     | q12-q13.13    |
| 222477_s_at  | 1.00 | 0.97 | P    | 458.97  | 2.32 | 0.00 | P    | 1048.23 | TM7SF3    | 12q11-q12     |
| 222113_s_at  | 0.99 | 0.93 | P    | 131.83  | 2.32 | 0.00 | P    | 300.33  | EPS15L1   | 19p13.12      |
| 225922_at    | 0.99 | 0.94 | P    | 242.80  | 2.32 | 0.00 | P    | 555.77  | KIAA1450  | 4q32.1        |
| 202279_at    | 1.00 | 0.96 | P    | 795.67  | 2.32 | 0.00 | P    | 1810.20 | C14orf2   | 14q32.33      |
| 214260_at    | 1.00 | 0.95 | P    | 102.00  | 2.32 | 0.00 | P    | 233.10  | COPB8     | 2q37.3        |
| 222555_s_at  | 0.98 | 0.91 | P    | 376.17  | 2.32 | 0.00 | P    | 865.90  | MRPL44    | 2q36.3        |
| 237622_at    | 1.00 | 0.98 | A    | 38.93   | 2.32 | 0.00 | P    | 89.03   |           |               |
| 235588_at    | 0.99 | 0.93 | P,MA | 87.00   | 2.32 | 0.01 | P    | 197.90  | LOC157570 | 8p21.1        |
| 214306_at    | 1.00 | 0.95 | P    | 133.60  | 2.31 | 0.01 | P    | 304.80  | OPA1      | 3q28-q29      |
| 226901_at    | 0.99 | 0.94 | P    | 220.50  | 2.31 | 0.01 | P    | 503.80  | LOC284018 | 17q24.3       |
| 207029_at    | 0.98 | 0.91 | PA   | 16.47   | 2.31 | 0.02 | P    | 38.40   | KITLG     | 12q22         |
| 155942_at    | 0.99 | 0.92 | P    | 152.83  | 2.31 | 0.01 | P    | 346.87  | HIC       | 7q31.2        |
| 230653_at    | 1.00 | 0.97 | P    | 76.77   | 2.31 | 0.02 | P    | 176.37  |           |               |
| 212246_at    | 1.00 | 0.97 | P    | 349.30  | 2.31 | 0.01 | P    | 797.97  | LYRIC     | 8q22.1        |
| 219892_s_at  | 1.00 | 0.97 | PA   | 30.47   | 2.31 | 0.01 | PA   | 69.47   | SENF1A    | 3q12.2-q13.3  |
| 209093_s_at  | 1.00 | 0.96 | P    | 232.63  | 2.31 | 0.00 | P    | 529.60  | GBA       | 1q21          |
| 211930_at    | 0.99 | 0.93 | P    | 298.87  | 2.31 | 0.02 | P    | 685.37  | hnRNPA3   | 2q31.2        |
| 241687_at    | 1.00 | 0.97 | P    | 63.63   | 2.31 | 0.01 | P    | 144.77  |           |               |
| 218188_s_at  | 1.00 | 0.98 | P    | 578.47  | 2.31 | 0.01 | P    | 1312.90 | TMMH3     | 19p13.3       |
| 1557593_at   | 0.99 | 0.94 | PA   | 12.13   | 2.31 | 0.01 | P    | 27.53   | PF6       | 12p12         |
| 211060_x_at  | 1.00 | 0.98 | P    | 392.53  | 2.31 | 0.00 | P    | 889.73  | GPAA1     | 8q24.3        |
| 238781_at    | 0.98 | 0.90 | PM   | 54.50   | 2.31 | 0.01 | P    | 124.40  | SFRS12    | 5q12.3        |
| 221436_s_at  | 1.00 | 0.95 | P    | 362.93  | 2.30 | 0.02 | P    | 833.47  | CDCA3     | 12p13         |
| 221004_s_at  | 1.00 | 0.97 | PM   | 233.50  | 2.30 | 0.00 | P    | 529.87  | ITM2C     | 2q37          |
| 202047_s_at  | 0.99 | 0.95 | PA   | 373.37  | 2    |      |      |         |           |               |

|              |      |      |       |         |      |      |       |         |           |               |
|--------------|------|------|-------|---------|------|------|-------|---------|-----------|---------------|
| 203230_at    | 1.00 | 0.95 | P     | 136.43  | 2.30 | 0.00 | P     | 308.53  | DVL1      | 1p36          |
| 218264_at    | 0.98 | 0.90 | P     | 169.53  | 2.30 | 0.01 | P     | 387.43  | BCCIP     | 10q26.1       |
| 242486_at    | 0.99 | 0.93 | P     | 90.17   | 2.29 | 0.00 | P     | 203.33  |           |               |
| 207234_at    | 0.99 | 0.95 | P     | 22.43   | 2.29 | 0.01 | P     | 51.13   | RFX3      | 9p24.2        |
| 237400_at    | 1.00 | 0.98 | P     | 34.40   | 2.29 | 0.01 | P     | 78.30   | ATP5S     | 14q22.1       |
| 1557429_s_at | 0.98 | 0.91 | A     | 5.23    | 2.29 | 0.03 | PA    | 12.07   | FLJ32800  | 15q15.3       |
| 241418_at    | 1.00 | 0.99 | M.A   | 41.80   | 2.29 | 0.01 | P     | 95.27   |           |               |
| 210720_s_at  | 1.00 | 0.97 | P     | 200.93  | 2.29 | 0.00 | P     | 453.03  | APBA2BP   | 20q11.22      |
| 225657_at    | 1.00 | 0.99 | P     | 375.30  | 2.29 | 0.00 | P     | 845.59  | LOC152217 | 3q29          |
| 225612_s_at  | 0.99 | 0.95 | P     | 217.13  | 2.29 | 0.01 | P     | 490.87  | B3GNT5    | 3q28          |
| 244674_at    | 0.99 | 0.94 | A     | 42.47   | 2.29 | 0.01 | P     | 95.77   |           |               |
| 200782_at    | 0.99 | 0.93 | P     | 2074.07 | 2.29 | 0.00 | P     | 4688.57 | ANXA5     | 4q28-q32      |
| 216352_s_at  | 0.99 | 0.92 | A     | 39.77   | 2.29 | 0.01 | P     | 89.87   | PCDHGA3   | 5q31          |
| 228637_at    | 0.99 | 0.94 | PA    | 35.27   | 2.29 | 0.01 | P     | 79.93   | UBE2H     | 7q32          |
| 226249_at    | 1.00 | 0.98 | P     | 221.07  | 2.29 | 0.01 | P     | 498.03  |           | 9q33.1        |
| 204956_at    | 1.00 | 0.96 | P     | 78.40   | 2.28 | 0.02 | P     | 177.20  | MTAP      | 9p21          |
| 226432_at    | 0.99 | 0.95 | P     | 129.03  | 2.28 | 0.00 | P     | 290.40  |           |               |
| 203897_at    | 1.00 | 0.96 | P     | 115.90  | 2.28 | 0.02 | P     | 263.07  |           |               |
| 210792_s_at  | 0.98 | 0.90 | P     | 450.67  | 2.28 | 0.00 | P     | 1015.30 | LOC57149  | 16p11.2       |
| 232652_x_at  | 0.99 | 0.95 | P     | 305.27  | 2.28 | 0.01 | P     | 683.77  | SNA       | 14q32.33      |
| 212431_at    | 1.00 | 0.97 | PA    | 148.83  | 2.28 | 0.00 | P     | 335.43  | SCAND1    | 0q11.1-q11.23 |
| 242407_at    | 0.99 | 0.94 | P.M.A | 33.63   | 2.28 | 0.02 | P     | 76.20   | KIAA0194  | 5q33.1        |
| 223360_at    | 1.00 | 0.96 | P     | 105.83  | 2.28 | 0.00 | P     | 237.50  | C21orf56  | 21q22.3       |
| 219972_s_at  | 0.98 | 0.91 | P     | 111.30  | 2.28 | 0.01 | P     | 250.80  | C14orf135 | 14q23.1       |
| 238822_at    | 0.99 | 0.93 | P     | 58.30   | 2.28 | 0.01 | P     | 130.83  |           |               |
| 235007_at    | 1.00 | 0.95 | P     | 42.90   | 2.28 | 0.02 | P     | 96.60   | BBS7      | 4q27          |
| 219736_at    | 0.99 | 0.92 | P     | 63.17   | 2.28 | 0.02 | P     | 142.87  | TRIM36    | 5q23.1        |
| 203340_s_at  | 0.99 | 0.93 | P     | 211.23  | 2.28 | 0.00 | P     | 475.00  | SLC25A12  | 2q24          |
| 223332_s_at  | 1.00 | 0.97 | PA    | 138.07  | 2.27 | 0.00 | P     | 310.27  | RNF126    | 19p13.3       |
| 227178_at    | 1.00 | 0.97 | PA    | 74.07   | 2.27 | 0.00 | P     | 166.07  | CUGBP2    | 10p13         |
| 219348_at    | 1.00 | 0.96 | P     | 83.03   | 2.27 | 0.00 | P     | 186.10  | MDS032    | 19p13.12      |
| 209120_at    | 1.00 | 0.96 | P     | 196.03  | 2.27 | 0.02 | P     | 443.23  | NR2F2     | 15q26         |
| 224605_at    | 0.98 | 0.90 | P     | 169.77  | 2.27 | 0.01 | P     | 380.03  |           | 4q27          |
| 206302_s_at  | 1.00 | 0.96 | P     | 252.90  | 2.27 | 0.00 | P     | 586.63  |           |               |
| 228304_at    | 0.99 | 0.94 | PA    | 34.13   | 2.27 | 0.01 | P     | 76.43   | NUDT4     | 12q21         |
| 225276_at    | 1.00 | 0.98 | PA    | 198.97  | 2.27 | 0.00 | P     | 444.30  | GSPT1     | 16p13.1       |
| 212263_at    | 1.00 | 0.98 | P     | 302.53  | 2.27 | 0.01 | P     | 676.43  | OKI       | 6q26-27       |
| 1553559_at   | 0.99 | 0.93 | A     | 60.03   | 2.27 | 0.01 | P     | 136.20  | LOC134285 | 5q13.3        |
| 224875_at    | 0.99 | 0.91 | P     | 376.43  | 2.27 | 0.01 | P     | 750.43  | FLJ37562  | 5q12          |
| 204074_s_at  | 0.99 | 0.94 | PA    | 90.20   | 2.27 | 0.00 | P     | 201.37  | KIAA0562  | 1p36.32       |
| 205545_x_at  | 1.00 | 0.97 | P     | 232.67  | 2.27 | 0.00 | P     | 518.07  | DNAJC8    | 1p35.2        |
| 222624_s_at  | 1.00 | 0.96 | P     | 100.50  | 2.27 | 0.01 | P     | 225.63  | ANC_2H01  | 3q27.1        |
| 221537_at    | 1.00 | 0.95 | P     | 128.47  | 2.27 | 0.01 | P     | 288.03  | KFZ564A1  | 3q27.3        |
| 205928_s_at  | 1.00 | 0.95 | P     | 87.30   | 2.27 | 0.01 | P     | 150.50  | KIAA0683  | 16p13.3       |
| 242984_at    | 0.98 | 0.90 | P.M.A | 28.23   | 2.27 | 0.02 | P     | 64.60   | MKLN1     | 7q32          |
| 221787_at    | 1.00 | 0.96 | P     | 112.67  | 2.27 | 0.01 | P     | 253.07  | PHF10     | 6q27          |
| 212241_at    | 0.99 | 0.94 | P     | 159.70  | 2.27 | 0.00 | P     | 357.20  | GRINL1A   | 15q22.1       |
| 201611_s_at  | 1.00 | 0.96 | P     | 167.27  | 2.26 | 0.00 | P     | 373.50  | ICMT      | 1p36.21       |
| 239719_at    | 0.99 | 0.94 | P     | 154.97  | 2.26 | 0.00 | P     | 344.50  | CD109     | 6q14          |
| 208877_at    | 1.00 | 0.96 | P     | 476.90  | 2.26 | 0.00 | P     | 1066.37 | PAK2      | 3q29          |
| 52164_at     | 1.00 | 0.95 | P     | 736.47  | 2.26 | 0.01 | P     | 1656.27 | C11orf24  | 11q13         |
| 219819_s_at  | 0.99 | 0.94 | P     | 473.40  | 2.26 | 0.00 | P     | 1056.30 | MRPS28    | 3q21.1-q21.2  |
| 201661_s_at  | 0.99 | 0.95 | P     | 379.47  | 2.26 | 0.00 | P     | 846.30  | ACSL3     | 2q34-q35      |
| 225478_at    | 0.98 | 0.91 | P     | 89.53   | 2.26 | 0.01 | P     | 180.77  |           |               |
| 1558797_at   | 1.00 | 0.97 | PA    | 12.63   | 2.26 | 0.01 | P     | 28.27   |           |               |
| 223355_at    | 0.98 | 0.89 | M.A   | 97.10   | 2.26 | 0.02 | P     | 218.57  | ALG1      | 16p13.3       |
| 229876_at    | 0.99 | 0.93 | A     | 48.37   | 2.26 | 0.00 | PA    | 107.67  | PHKA1     | Xq12-q13      |
| 223138_s_at  | 0.99 | 0.94 | P     | 352.53  | 2.26 | 0.02 | P     | 791.23  | DHX36     | 3p13-q23      |
| 205298_s_at  | 0.99 | 0.96 | P     | 230.53  | 2.26 | 0.01 | P     | 514.17  | BTN2A2    | 6q22.1        |
| 219628_at    | 0.98 | 0.91 | P     | 163.87  | 2.26 | 0.00 | P     | 362.47  | WIG1      | 3q26.3-q27    |
| 212294_at    | 1.00 | 0.95 | P     | 1089.80 | 2.26 | 0.00 | P     | 2429.43 | GNG12     | 1p31.2        |
| 210465_s_at  | 0.99 | 0.94 | PA    | 127.53  | 2.26 | 0.00 | P     | 285.43  | SNAPC3    | 9p22.2        |
| 218195_at    | 0.99 | 0.94 | P     | 438.90  | 2.26 | 0.00 | P     | 978.00  | C6orf21   | 6q25.1        |
| 228990_at    | 1.00 | 0.96 | P     | 212.57  | 2.26 | 0.00 | P     | 250.23  | LOC50528  | 1p35.2        |
| 211067_s_at  | 1.00 | 0.98 | M.A   | 149.23  | 2.26 | 0.00 | P     | 332.00  | GAS7      | 17p13.1       |
| 215690_x_at  | 0.99 | 0.95 | PA    | 432.47  | 2.26 | 0.01 | P     | 964.47  | GPAA1     | 8q24.3        |
| 222649_at    | 0.99 | 0.95 | P     | 158.70  | 2.26 | 0.00 | P     | 352.20  | XPO4      | 13q11         |
| 227063_at    | 1.00 | 0.98 | P     | 335.63  | 2.26 | 0.00 | P     | 744.40  | MGC40107  | 17p13.2       |
| 214241_at    | 1.00 | 0.99 | P     | 176.10  | 2.26 | 0.01 | P     | 169.23  | NDUFEB    | 3q21.2-q23.33 |
| 219265_at    | 0.98 | 0.90 | A     | 101.57  | 2.25 | 0.01 | P     | 226.87  | MOBK2B    | 9p21.1        |
| 1554780_a_at | 1.00 | 0.96 | P     | 100.20  | 2.25 | 0.00 | P     | 222.80  | PHTF2     | 7q11.23-q21   |
| 218817_at    | 0.99 | 0.95 | P     | 68.67   | 2.25 | 0.00 | P     | 153.23  | FLJ22649  | 4q34.2        |
| 212525_s_at  | 0.99 | 0.94 | P.M   | 191.60  | 2.25 | 0.01 | P     | 429.47  | H2AFX     | 16q23-q23.3   |
| 1554064_a_at | 1.00 | 0.99 | PA    | 125.20  | 2.25 | 0.01 | P     | 277.67  | ATP11B    | 3q27          |
| 242057_at    | 0.99 | 0.92 | P     | 18.27   | 2.25 | 0.02 | P     | 40.80   |           |               |
| 213861_s_at  | 0.99 | 0.93 | P     | 132.00  | 2.25 | 0.00 | P     | 294.47  | FZP586D01 | 12q13.2       |
| 229742_at    | 1.00 | 0.98 | P     | 444.27  | 2.25 | 0.00 | P     | 984.30  |           | 15q22.31      |
| 226358_at    | 1.00 | 0.97 | A     | 39.53   | 2.25 | 0.00 | P     | 87.80   | LOC14584  | 15q22.1       |
| 204441_at    | 1.00 | 0.97 | P     | 971.70  | 2.25 | 0.01 | P     | 2146.73 | TUBB      | 9p25          |
| 242470_at    | 0.99 | 0.94 | P     | 26.67   | 2.25 | 0.02 | P     | 59.47   | FLJ38944  | 19q13.2       |
| 226041_at    | 1.00 | 0.98 | P     | 123.47  | 2.25 | 0.00 | P     | 273.53  | NAPE-PLD  | 7q22.1        |
| 221808_at    | 1.00 | 0.97 | P     | 449.27  | 2.25 | 0.00 | P     | 995.13  | RAB9A     | xp22.2        |
| 207719_s_at  | 1.00 | 0.98 | P     | 512.07  | 2.25 | 0.00 | P     | 1133.40 | KAB       | 1q44          |
| 228710_at    | 1.00 | 0.99 | P     | 159.73  | 2.25 | 0.01 | P     | 354.03  |           |               |
| 222977_at    | 1.00 | 0.97 | P     | 602.37  | 2.25 | 0.00 | P     | 1335.27 | SURF4     | 9q34.2        |
| 1552303_a_at | 1.00 | 0.96 | P     | 32.40   | 2.25 | 0.00 | P     | 71.47   | MGC20235  | 17q21.31      |
| 203482_at    | 1.00 | 0.99 | P     | 174.50  | 2.25 | 0.01 | P     | 386.73  | C10orf6   | 10q24.32      |
| 238034_at    | 1.00 | 0.95 | P     | 153.60  | 2.25 | 0.01 | P     | 339.67  | CANX      | 5q35          |
| 225234_at    | 0.99 | 0.92 | P.M   | 62.97   | 2.25 | 0.01 | P     | 136.67  | GDF11     | 12q13.13      |
| 227406_at    | 0.99 | 0.93 | P     | 180.93  | 2.25 | 0.00 | P     | 398.27  | GABPB2    | 15q21.2       |
| 230758_at    | 0.99 | 0.94 | P     | 34.20   | 2.24 | 0.01 | P     | 75.70   |           |               |
| 239721_at    | 1.00 | 0.96 | P     | 76.20   | 2.24 | 0.03 | P     | 170.17  |           |               |
| 209306_s_at  | 1.00 | 0.97 | P     | 626.53  | 2.24 | 0.00 | P     | 1384.37 | SWAP70    | 11p15         |
| 229072_at    | 1.00 | 0.99 | A     | 32.17   | 2.24 | 0.01 | P     | 71.03   |           |               |
| 201248_s_at  | 0.99 | 0.95 | P     | 283.73  | 2.24 | 0.00 | P     | 627.97  | SREBF2    | 22q13         |
| 230435_at    | 0.99 | 0.94 | A     | 38.70   | 2.24 | 0.01 | P.M.A | 85.63   | FLJ30851  | 2p24.1        |
| 205362_s_at  | 0.99 | 0.93 | P     | 71.70   | 2.24 | 0.01 | P     | 159.37  | PFDN4     | 20q13         |
| 221045_s_at  | 0.99 | 0.93 | P     | 230.50  | 2.24 | 0.00 | P     | 509.80  | PER3      | 1p36.23       |
| 222672_at    | 0.99 | 0.92 | PA    | 49.30   | 2.24 | 0.02 | P     | 109.50  | C6orf149  | 6q25.1        |
| 201918_at    | 0.99 | 0.92 | P     | 386.33  | 2.24 | 0.00 | P     | 853.73  | FLJ10618  | 3q23          |
| 227787_s_at  | 1.00 | 0.96 | P     | 136.87  | 2.24 | 0.00 | P     | 302.10  | THRAP6    | 8q24.11       |
| 1562648_at   | 0.99 | 0.94 | PA    | 20.93   | 2.24 | 0.02 | P     | 46.33   | LOC55580  | 2p16.3        |
| 242755_at    | 1.00 | 0.95 | PA    | 10.23   | 2.24 | 0.00 | P     | 22.57   |           |               |
| 223396_at    | 1.00 | 0.99 | P     | 397.40  | 2.24 | 0.00 | P     | 874.57  | C7orf35   | 7q21.11       |
| 218147_s_at  | 1.00 | 0.96 | P     | 247.17  | 2.24 | 0.01 | P     | 546.40  | AD-017    | 3p21.31       |
| 229329_s_at  | 0.98 | 0.90 | PA    | 27.77   | 2.23 | 0.03 | PA    | 62.23   | HSPC182   | 1p36.33       |
| 224890_s_at  | 1.00 | 0.95 | P     | 376.43  | 2.23 | 0.01 | P     | 829.00  |           | 7             |
| 222465_at    | 1.00 | 0.99 | P     | 1015.23 | 2.23 | 0.01 | P     | 2234.10 | C15orf15  | 15q21         |
| 227005_at    | 1.00 | 0.95 | P     | 295.43  | 2.23 | 0.00 | P     | 540.27  | RFP4      | 3q21.2        |
| 227108_at    | 0.99 | 0.94 | P     | 20.57   | 2.23 | 0.02 | P     | 45.40   | STARD9    | 15q14         |
| 219204_s_at  | 0.99 | 0.93 | P     | 45.50   | 2.23 | 0.02 | P     | 100.90  | SRR       | 17p13         |
| 217974_at    | 0.98 | 0.89 | P     | 69.77   | 2.23 | 0.01 | P     | 152.93  | TM7SF3    | 12q11-q12     |
| 218701_at    | 0.99 | 0.95 | P     | 154.67  | 2.23 | 0.00 | P     | 340.00  | LACTB2    | 8p22-q22.3    |
| 225354_at    | 0.99 | 0.94 | P     | 154.13  | 2.23 | 0.01 | P     | 496.10  | LACTB     | 15q22.1       |
| 230032_at    | 1.00 | 0.98 | P     | 170.00  | 2.23 | 0.00 | P     | 371.77  | OSGEP1    | 2q32.3        |
| 40273_at     | 0.99 | 0.93 | P.M.A | 152.87  | 2.23 | 0.00 | P     | 334.30  | SPHK2     | 19p13.2       |
| 201836_s_at  | 0.99 | 0.93 | PA    | 53.50   | 2.22 | 0.01 | P     | 117.63  | AF65(aamm | 2pter-p25.1   |
| 223015_at    | 1.00 | 0.98 | P     | 894.73  | 2.22 | 0.00 | P     | 1938.13 | eIF2A     | 3q25.1        |
| 227851_at    | 1.00 | 0.97 | PA    | 576.27  | 2.22 | 0.00 | P     | 1263.33 | MGC33214  | 5q14.3        |
|              |      |      |       |         |      |      |       |         |           |               |

|             |      |      |     |         |      |      |     |         |            |               |
|-------------|------|------|-----|---------|------|------|-----|---------|------------|---------------|
| 215411_s_at | 0.98 | 0.90 | P   | 291.77  | 2.22 | 0.00 | P   | 633.47  | C6orf4     | 6q21          |
| 230265_at   | 0.98 | 0.91 | P   | 62.10   | 2.22 | 0.00 | P   | 136.57  | SEL1L      | 14q24.3-q31   |
| 218771_at   | 0.99 | 0.94 | P   | 166.77  | 2.22 | 0.00 | P   | 364.83  | PANK1      | 1p36.32       |
| 225063_at   | 0.99 | 0.94 | P   | 284.97  | 2.22 | 0.00 | P   | 629.07  | BWSC4BP    | 15q23         |
| 206194_at   | 0.99 | 0.93 | P   | 117.77  | 2.22 | 0.00 | P   | 257.50  | HOXC4      | 12q13.3       |
| 212445_s_at | 1.00 | 0.98 | P   | 203.03  | 2.22 | 0.00 | P   | 441.97  | NEDD4L     | 18q21         |
| 235706_at   | 0.98 | 0.90 | P   | 91.17   | 2.22 | 0.03 | P   | 202.43  | CPM        | 12q14.3       |
| 205659_at   | 1.00 | 0.95 | P   | 132.00  | 2.22 | 0.00 | P   | 288.43  | HDAC9      | 7p21.1        |
| 203774_at   | 1.00 | 0.96 | P   | 230.37  | 2.22 | 0.00 | P   | 504.83  | MTR        | 1q43          |
| 231953_at   | 0.99 | 0.92 | P   | 47.20   | 2.21 | 0.00 | P   | 102.50  | FALZ       | 17q24.3       |
| 222845_x_at | 1.00 | 0.97 | P   | 1053.40 | 2.21 | 0.00 | P   | 2298.30 | CGI-119    | 12q14.1-q15   |
| 229333_at   | 1.00 | 0.99 | P   | 167.77  | 2.21 | 0.00 | P   | 365.67  |            |               |
| 1554057_at  | 1.00 | 0.98 | P   | 121.93  | 2.21 | 0.01 | P   | 267.10  |            |               |
| 218593_at   | 1.00 | 0.98 | P   | 430.07  | 2.21 | 0.00 | P   | 935.93  |            |               |
| 221014_s_at | 0.99 | 0.95 | P   | 49.63   | 2.21 | 0.01 | P   | 108.50  | FLJ10377   | 7q32.2        |
| 226003_at   | 1.00 | 0.99 | P   | 223.87  | 2.21 | 0.01 | P   | 488.43  | RAB33B     | 4q28          |
| 224591_at   | 1.00 | 0.98 | P   | 747.47  | 2.21 | 0.01 | P   | 1626.90 | KIF21A     | 12q12         |
| 223991_s_at | 0.99 | 0.94 | P   | 104.00  | 2.21 | 0.00 | P   | 226.80  | HP1-BP74   | 1p36.12       |
| 217902_s_at | 1.00 | 0.99 | P   | 137.47  | 2.21 | 0.00 | P   | 299.10  | GALNT2     | 1q41-q42      |
| 201727_s_at | 1.00 | 0.96 | PA  | 256.87  | 2.21 | 0.00 | P   | 562.77  | HERC2      | 15q13         |
| 225099_at   | 1.00 | 0.97 | P   | 379.77  | 2.21 | 0.01 | P   | 827.67  | ELAVL1     | 19p13.2       |
| 212491_s_at | 0.99 | 0.94 | PM  | 127.87  | 2.21 | 0.00 | P   | 278.80  | LOC200933  | 3q29          |
| 221512_at   | 1.00 | 1.00 | A   | 185.20  | 2.21 | 0.00 | P   | 402.47  | DNAJC8     | 1p35.2        |
| 204137_at   | 0.99 | 0.93 | PM  | 129.30  | 2.21 | 0.00 | P   | 281.87  | FZP564D0   | 1p35.3        |
| 217716_s_at | 1.00 | 0.95 | P   | 1074.57 | 2.21 | 0.00 | P   | 2338.20 | TMSF1      | 16q2-q43      |
| 229450_at   | 0.99 | 0.95 | P   | 106.47  | 2.21 | 0.00 | P   | 231.70  | SEC61A1    | 3q21.3        |
| 215096_s_at | 1.00 | 0.97 | P   | 615.93  | 2.20 | 0.01 | P   | 1335.20 | IFIT4      | 10q24         |
| 201733_at   | 0.99 | 0.94 | P   | 141.63  | 2.20 | 0.02 | P   | 308.30  | ESD        | 3q14.1-q14.2  |
| 203730_s_at | 0.99 | 0.93 | P   | 108.13  | 2.20 | 0.00 | P   | 235.60  | CLCN3      | 4q33          |
| 227445_at   | 0.99 | 0.92 | PA  | 90.27   | 2.20 | 0.00 | P   | 196.83  | ZFP95      | 7q22          |
| 212172_at   | 0.98 | 0.91 | P   | 50.07   | 2.20 | 0.02 | P   | 108.67  | LOC115509  | 16p11.2       |
| 212723_at   | 0.99 | 0.93 | P   | 342.70  | 2.20 | 0.00 | P   | 741.37  | AK2        | 1p34          |
| 207606_s_at | 1.00 | 0.97 | P   | 152.63  | 2.20 | 0.01 | P   | 331.43  | PTDSR      | 17q25         |
| 222951_at   | 0.98 | 0.91 | P   | 68.97   | 2.20 | 0.00 | P   | 124.00  | ARHGAP12   | 10q11.1       |
| 200734_s_at | 1.00 | 0.96 | PA  | 373.83  | 2.20 | 0.00 | P   | 811.87  | SMARGE1    | 10q11.2       |
| 219206_x_at | 1.00 | 0.99 | P   | 652.83  | 2.20 | 0.00 | P   | 1415.23 | ARF3       | 12q13         |
| 222411_s_at | 1.00 | 0.98 | P   | 1232.00 | 2.20 | 0.00 | P   | 2670.67 | CGI-119    | 12q14.1-q15   |
| 202930_s_at | 0.99 | 0.93 | P   | 362.13  | 2.20 | 0.00 | P   | 786.40  | SSR3       | 3q25.31       |
| 218754_at   | 1.00 | 0.98 | P   | 262.13  | 2.20 | 0.00 | P   | 515.90  | SUCLA2     | 3q12.2-q13.3  |
| 220750_s_at | 1.00 | 0.97 | P   | 130.77  | 2.20 | 0.00 | P   | 283.90  | FLJ23323   | 1q36.23       |
| 64883_at    | 0.99 | 0.94 | P   | 130.93  | 2.20 | 0.00 | P   | 282.97  | LEPRE1     | 1p34.1        |
| 243367_at   | 0.98 | 0.90 | PA  | 37.30   | 2.20 | 0.02 | P   | 81.67   | MOSPD2     | xp22.31       |
| 209009_at   | 1.00 | 0.98 | P   | 750.70  | 2.20 | 0.00 | P   | 1624.17 |            |               |
| 209285_s_at | 0.99 | 0.94 | P   | 417.63  | 2.19 | 0.01 | P   | 906.07  | ESD        | 3q14.1-q14.2  |
| 208734_x_at | 0.99 | 0.93 | P   | 671.23  | 2.19 | 0.01 | P   | 1454.93 | CDC42EP3   | 2p21          |
| 209172_s_at | 1.00 | 0.99 | P   | 261.17  | 2.19 | 0.02 | P   | 567.17  | RAB2       | 8q12.1        |
| 222705_s_at | 0.99 | 0.93 | A   | 66.57   | 2.19 | 0.01 | P   | 144.20  | CENPF      | 1q32-q41      |
| 244193_at   | 1.00 | 0.98 | P   | 78.17   | 2.19 | 0.00 | P   | 169.07  | SLC25A15   | 13q14         |
| 212002_at   | 1.00 | 0.96 | PM  | 220.73  | 2.19 | 0.00 | P   | 476.63  | FLJ13236   | 12q13.12      |
| 203449_s_at | 1.00 | 1.00 | P   | 180.03  | 2.19 | 0.01 | P   | 388.90  | FZ5566C04  | 1p36.13       |
| 201581_at   | 1.00 | 0.96 | P   | 524.23  | 2.19 | 0.00 | P   | 1132.30 | TERF1      | 8q13          |
| 225293_at   | 0.99 | 0.92 | A   | 53.27   | 2.19 | 0.01 | P   | 114.50  | DJ971N18.2 | 20p12         |
| 225074_at   | 0.99 | 0.92 | P   | 165.67  | 2.19 | 0.00 | P   | 359.27  | COL27A1    | 9q33.1        |
| 225162_at   | 0.99 | 0.94 | P   | 332.03  | 2.19 | 0.00 | P   | 684.93  | RAB2B      | 14q11.2       |
| 1565939_at  | 0.99 | 0.91 | PA  | 19.73   | 2.19 | 0.00 | P   | 42.73   | FZ5434D02  | 1q36.23       |
| 223892_s_at | 1.00 | 0.97 | P   | 989.47  | 2.19 | 0.00 | P   | 2135.67 | FLJ11193   | 5p13.3        |
| 213554_s_at | 0.99 | 0.95 | P   | 248.27  | 2.19 | 0.00 | P   | 535.73  | CGI-119    | 12q14.1-q15   |
| 212251_at   | 0.99 | 0.94 | P   | 625.43  | 2.19 | 0.01 | P   | 1348.50 | H41        | 3q22.1        |
| 213394_at   | 1.00 | 0.99 | A   | 155.33  | 2.19 | 0.00 | PMA | 340.73  | LYRIC      | 8q22.1        |
| 209239_at   | 1.00 | 0.99 | P   | 303.13  | 2.19 | 0.00 | P   | 653.87  | KLHL3      | 5q21          |
| 242928_at   | 0.99 | 0.94 | P   | 20.47   | 2.19 | 0.02 | P   | 44.37   | NFKB1      | 4q24          |
| 232565_at   | 0.98 | 0.90 | A   | 29.47   | 2.19 | 0.01 | P   | 63.67   |            |               |
| 1555024_at  | 1.00 | 0.97 | PA  | 6.37    | 2.18 | 0.01 | PA  | 13.77   | ADAM22     | 7q21          |
| 1559268_at  | 0.99 | 0.94 | A   | 38.83   | 2.18 | 0.00 | P   | 84.60   | ADAM23     | 2q33          |
| 207428_x_at | 1.00 | 0.95 | PA  | 118.50  | 2.18 | 0.01 | P   | 256.70  | CDC2L1     | 1p36          |
| 225024_at   | 0.99 | 0.95 | P   | 285.70  | 2.18 | 0.00 | P   | 615.17  | C20orf77   | 10q11.21-q12  |
| 235260_s_at | 0.99 | 0.93 | P   | 150.00  | 2.18 | 0.00 | P   | 323.17  | MGC29898   | 4p15.32       |
| 157062_at   | 0.98 | 0.91 | P   | 27.23   | 2.18 | 0.02 | P   | 58.37   |            |               |
| 201001_s_at | 0.99 | 0.94 | P   | 62.83   | 2.18 | 0.00 | P   | 1079.27 | UBE2V1     | 20q13.2       |
| 239835_at   | 1.00 | 0.96 | P   | 42.33   | 2.18 | 0.01 | P   | 90.60   | TA-KRP     | 3p14          |
| 218093_s_at | 0.99 | 0.93 | P   | 173.17  | 2.18 | 0.00 | P   | 372.40  | ANKRD10    | 13q34         |
| 225692_at   | 1.00 | 0.97 | P   | 606.20  | 2.18 | 0.00 | P   | 1296.03 | CAMTA1     | 1p36.23       |
| 218376_s_at | 0.99 | 0.92 | P   | 159.90  | 2.18 | 0.03 | P   | 345.23  | NICAL      | 8q21          |
| 204335_at   | 1.00 | 0.97 | P   | 62.87   | 2.18 | 0.00 | P   | 134.70  | FLJ10374   | 19p13.3       |
| 34764_at    | 1.00 | 0.95 | P   | 112.97  | 2.18 | 0.01 | P   | 241.53  | LARS2      | 3p21.3        |
| 224573_at   | 0.99 | 0.95 | P   | 1975.23 | 2.17 | 0.00 | P   | 4237.67 | MGC49942   | 17p13.2       |
| 242384_at   | 1.00 | 0.96 | PA  | 29.33   | 2.17 | 0.02 | P   | 63.23   |            |               |
| 204040_at   | 1.00 | 0.97 | P   | 190.93  | 2.17 | 0.01 | P   | 407.47  | RNF144     | 2p25.2        |
| 35571_at    | 1.00 | 0.97 | P   | 252.17  | 2.17 | 0.00 | P   | 537.90  | GTF3C1     | 16p12         |
| 217852_s_at | 1.00 | 0.96 | P   | 547.17  | 2.17 | 0.00 | P   | 1169.97 | ARL10C     | 3p26.1        |
| 241464_s_at | 1.00 | 0.97 | A   | 75.53   | 2.17 | 0.00 | P   | 161.63  |            |               |
| 222430_s_at | 0.99 | 0.94 | P   | 382.10  | 2.17 | 0.01 | P   | 818.10  | HGRG8      | 1p35          |
| 228092_at   | 0.99 | 0.94 | P   | 176.03  | 2.17 | 0.00 | P   | 376.60  | CREM       | 10p11.21      |
| 234949_at   | 0.99 | 0.91 | P   | 44.50   | 2.17 | 0.00 | P   | 96.43   | MGC72104   | 20p11.21      |
| 224626_at   | 1.00 | 0.96 | P   | 496.83  | 2.17 | 0.00 | P   | 1064.17 | SLC35A4    | 5q31.3        |
| 209665_at   | 1.00 | 0.96 | P   | 253.27  | 2.17 | 0.01 | P   | 543.37  | CYB561D2   | 3p21.3        |
| 223398_at   | 0.99 | 0.94 | P   | 164.73  | 2.17 | 0.00 | P   | 351.80  | C9orf89    | 9q22.32       |
| 208660_at   | 0.99 | 0.93 | P   | 1183.03 | 2.17 | 0.00 | P   | 2530.13 | CS         | 2q13.2-q13.3  |
| 225820_at   | 1.00 | 0.99 | P   | 59.03   | 2.17 | 0.00 | P   | 125.71  | PHF17      | 4q28-q27      |
| 224783_at   | 1.00 | 0.98 | P   | 150.43  | 2.16 | 0.03 | P   | 322.63  | MGC29814   | 17q25.3       |
| 203733_at   | 0.99 | 0.92 | P   | 278.90  | 2.16 | 0.00 | P   | 592.17  | DEX1       | 16p13.2       |
| 229930_at   | 0.99 | 0.92 | A   | 89.40   | 2.16 | 0.00 | P   | 189.57  |            |               |
| 204618_s_at | 0.98 | 0.91 | P   | 137.83  | 2.16 | 0.01 | P   | 295.40  | GABPB2     | 22q13.31      |
| 222753_s_at | 1.00 | 0.96 | PMA | 106.37  | 2.16 | 0.00 | P   | 226.40  | GRYL1      | 13p21.1       |
| 202141_s_at | 1.00 | 0.99 | P   | 1104.33 | 2.16 | 0.00 | P   | 2345.67 | COPS8      | 2q37.3        |
| 225322_s_at | 0.99 | 0.93 | A   | 45.17   | 2.16 | 0.00 | PMA | 96.37   | FLJ22175   | 17q25.3       |
| 217865_at   | 1.00 | 0.95 | P   | 629.53  | 2.16 | 0.00 | P   | 1338.90 | RNF130     | 5q35.3        |
| 209416_s_at | 1.00 | 0.96 | P   | 146.17  | 2.16 | 0.02 | P   | 316.33  | FZR1       | 19p13.3       |
| 231656_x_at | 0.99 | 0.91 | A   | 45.17   | 2.16 | 0.01 | P   | 96.83   | OSPL10     | 3q22          |
| 209029_at   | 1.00 | 0.99 | P   | 451.87  | 2.15 | 0.00 | P   | 957.20  | COP3A      | 12p13.31      |
| 202568_s_at | 0.99 | 0.94 | P   | 90.67   | 2.15 | 0.02 | P   | 195.97  | MARK3      | 14q32.3       |
| 242621_at   | 1.00 | 0.95 | PMA | 93.13   | 2.15 | 0.00 | P   | 198.63  | ZNF498     | 7q22.1        |
| 212908_at   | 1.00 | 0.99 | P   | 102.33  | 2.15 | 0.00 | P   | 216.63  | KIAA0962   | 7q22.1        |
| 201029_s_at | 1.00 | 0.98 | P   | 942.37  | 2.15 | 0.00 | P   | 1992.57 | CD99       | 12q32.2p11.3  |
| 1558692_at  | 0.99 | 0.94 | P   | 117.63  | 2.15 | 0.02 | P   | 250.20  | MGC31963   | 1q23.1        |
| 205379_at   | 1.00 | 0.98 | P   | 640.20  | 2.15 | 0.00 | P   | 1351.90 | CBR3       | 21q22.2       |
| 204808_s_at | 0.99 | 0.94 | P   | 623.87  | 2.15 | 0.00 | P   | 1316.43 | TMEM5      | 12q14.1       |
| 218793_s_at | 0.99 | 0.93 | P   | 151.97  | 2.15 | 0.00 | P   | 322.57  | SCML1      | 10q22.2-q22.1 |
| 204030_s_at | 1.00 | 0.98 | P   | 222.00  | 2.15 | 0.00 | P   | 617.33  | SCHIP1     | 3q28.33       |
| 1559485_at  | 0.99 | 0.92 | A   | 28.53   | 2.15 | 0.02 | PA  | 60.40   |            |               |
| 237157_at   | 1.00 | 0.96 | A   | 45.47   | 2.15 | 0.03 | PA  | 98.03   |            |               |
| 241706_at   | 1.00 | 0.95 | PM  | 220.17  | 2.15 | 0.00 | P   | 465.63  | CPNE8      | 12q12         |
| 209285_s_at | 0.98 | 0.90 | P   | 109.03  | 2.15 | 0.02 | P   | 233.10  | RAF140     | 3p21.31       |
| 219342_at   | 0.99 | 0.96 | P   | 67.97   | 2.15 | 0.00 | P   | 185.67  | CAS1       | 1p32          |
| 217631_at   | 0.99 | 0.92 | P   | 64.97   | 2.15 | 0.03 | P   | 139.13  | GTPBP4     | 10p15-p14     |
| 238785_at   | 0.98 | 0.91 | P   | 49.53   | 2.15 | 0.02 | P   | 105.73  |            |               |
| 235676_at   | 0.99 | 0.91 | P   | 51.67   | 2.15 | 0.01 | P   | 109.63  | LOC90701   | 18q21.32      |
| 202000_at   | 1.00 | 0.98 | P   | 256.97  | 2.15 | 0.00 | P   | 542.47  | NDUFA6     | 2q13.2-q13.31 |
|             |      |      |     |         |      |      |     |         |            |               |

|              |      |      |      |         |      |      |     |         |            |               |
|--------------|------|------|------|---------|------|------|-----|---------|------------|---------------|
| 212502_at    | 0.99 | 0.93 | P    | 391.30  | 2.14 | 0.00 | P   | 825.63  | C10orf22   | 10q21.3       |
| 223082_at    | 0.99 | 0.93 | P    | 549.63  | 2.14 | 0.00 | P   | 1152.27 | SH3KBP1    | q22.1-p21.3   |
| 225178_at    | 0.99 | 0.93 | P,MA | 163.43  | 2.14 | 0.01 | P   | 346.47  | TT C14     | 3q27.1        |
| 218894_s_at  | 0.99 | 0.93 | P    | 85.10   | 2.14 | 0.01 | P   | 175.67  | FLJ13220   | 4p13          |
| 241362_at    | 0.99 | 0.94 | A    | 33.57   | 2.14 | 0.00 | PA  | 70.50   | LOC284740  | 20q11.23      |
| 235300_x_at  | 1.00 | 0.97 | P    | 40.50   | 2.14 | 0.00 | P   | 85.33   | RCHY1      | 4q21.21       |
| 215031_x_at  | 1.00 | 0.96 | P    | 118.10  | 2.14 | 0.00 | P   | 248.83  | RNF126     | 19p13.3       |
| 201168_x_at  | 1.00 | 0.98 | P    | 1076.83 | 2.14 | 0.01 | P   | 2278.87 | ARHGSDIA   | 17q25.3       |
| 203866_at    | 0.99 | 0.94 | P    | 259.93  | 2.13 | 0.00 | P   | 547.53  | MPC        | 16p13.3       |
| 242636_at    | 0.98 | 0.91 | PA   | 22.87   | 2.13 | 0.01 | P   | 48.50   | PRCP       | 11q14         |
| 235918_x_at  | 1.00 | 0.97 | P    | 270.03  | 2.13 | 0.00 | P   | 566.00  | FLJ23047   | 3q12.3        |
| 225744_at    | 0.99 | 0.94 | P    | 233.27  | 2.13 | 0.01 | P   | 490.17  | ZDHH8      | 22q11.21      |
| 221964_at    | 1.00 | 0.96 | P,M  | 82.80   | 2.13 | 0.00 | P   | 173.43  | TULP9      | 12p13.3       |
| 203578_s_at  | 0.99 | 0.93 | P    | 34.97   | 2.13 | 0.00 | P   | 73.67   | SLC7A6     | 16q22.1       |
| 208733_at    | 0.99 | 0.95 | P    | 31.97   | 2.13 | 0.01 | P   | 67.03   | RAB2       | 8q12.1        |
| 177_at       | 0.99 | 0.94 | P    | 30.47   | 2.13 | 0.01 | P   | 64.47   | PLD1       | 3q26          |
| 212470_at    | 0.99 | 0.93 | P    | 308.83  | 2.13 | 0.01 | P   | 650.03  | SPAG9      | 17q21.33      |
| 202394_s_at  | 1.00 | 0.98 | P    | 112.00  | 2.13 | 0.01 | P   | 235.20  | TCOF1      | 5q32-q33.1    |
| 209213_at    | 0.99 | 0.94 | P    | 608.60  | 2.13 | 0.00 | P   | 129.47  | CBR1       | 21q22.13      |
| 233364_s_at  | 1.00 | 0.97 | A    | 14.90   | 2.13 | 0.02 | P   | 31.47   |            |               |
| 201988_s_at  | 1.00 | 0.97 | P    | 167.77  | 2.13 | 0.00 | P   | 352.63  | CREBL2     | 12p13         |
| 212018_s_at  | 0.99 | 0.92 | P    | 589.03  | 2.13 | 0.01 | P   | 1243.03 | KFZP564M1  | 16p13.13      |
| 201034_at    | 1.00 | 0.99 | P    | 430.03  | 2.13 | 0.00 | P   | 900.13  | HADHSC     | 4q22-q26      |
| 200090_at    | 1.00 | 0.99 | P    | 609.23  | 2.13 | 0.00 | P   | 1277.17 | FNIA       | 8q22-q11      |
| 227249_at    | 1.00 | 0.99 | P    | 246.73  | 2.13 | 0.01 | P   | 516.50  | NDE1       | 16p13.11      |
| 225653_at    | 0.98 | 0.90 | A    | 112.87  | 2.13 | 0.01 | P   | 239.37  | TGFBRAP1   | 2q12.2        |
| 225097_at    | 1.00 | 0.96 | PA   | 160.17  | 2.13 | 0.01 | P   | 336.70  | HIPK2      | 7q32-q34      |
| 244631_at    | 1.00 | 0.96 | P,M  | 45.27   | 2.13 | 0.00 | P   | 94.40   |            |               |
| 212494_at    | 1.00 | 0.97 | P    | 68.80   | 2.12 | 0.00 | P   | 145.27  | TENC1      | 12q13.13      |
| 218164_at    | 0.99 | 0.93 | P    | 273.77  | 2.12 | 0.00 | P   | 569.93  | FLJ21347   | 17q21.33      |
| 202572_s_at  | 1.00 | 0.96 | P    | 188.33  | 2.12 | 0.00 | P   | 394.53  | DLGAP4     | 20q11.23      |
| 225578_at    | 1.00 | 0.97 | P    | 629.57  | 2.12 | 0.00 | P   | 1317.37 |            |               |
| 236042_at    | 0.99 | 0.93 | PA   | 32.07   | 2.12 | 0.00 | P   | 66.90   |            | 12p13.33      |
| 238026_at    | 1.00 | 0.96 | P    | 224.67  | 2.12 | 0.00 | P   | 282.97  | RPL35A     | 3q29-qter     |
| 203885_at    | 0.99 | 0.95 | P    | 195.97  | 2.12 | 0.00 | P   | 410.57  | RAB21      | 12q15         |
| 231894_at    | 0.99 | 0.95 | P    | 59.73   | 2.12 | 0.02 | P   | 126.40  |            |               |
| 1553217_s_at | 1.00 | 0.96 | MA   | 20.37   | 2.12 | 0.01 | P   | 42.77   | ZNF41      | xp11.23       |
| 207826_s_at  | 0.99 | 0.92 | MA   | 155.07  | 2.12 | 0.01 | P   | 323.33  | ID3        | 3q6.13-q36.12 |
| 205090_at    | 1.00 | 0.96 | A    | 68.00   | 2.12 | 0.00 | P   | 141.83  | RARB       | 3q24          |
| 234584_s_at  | 0.99 | 0.95 | P    | 72.83   | 2.12 | 0.02 | P   | 153.40  | ATE1       | 10q26.13      |
| 205705_at    | 1.00 | 0.96 | PA   | 48.27   | 2.12 | 0.01 | P   | 101.43  | ANKRD26    | 10pter-q22.1  |
| 200950_at    | 0.99 | 0.92 | P    | 1237.00 | 2.12 | 0.00 | P   | 2596.53 | ARPC1A     | 7q22.1        |
| 222015_at    | 1.00 | 0.97 | A    | 126.17  | 2.12 | 0.01 | P   | 263.90  | CSNK1E     | 22q13.1       |
| 204169_at    | 1.00 | 0.96 | P    | 248.10  | 2.12 | 0.01 | P   | 520.80  | IMFDH1     | 7q31.3-q32    |
| 202626_s_at  | 1.00 | 0.98 | P    | 57.60   | 2.12 | 0.01 | P   | 121.00  | LYN        | 8q13          |
| 222138_s_at  | 0.99 | 0.93 | P    | 262.80  | 2.12 | 0.00 | P   | 545.33  | WDR13      | xp11.23       |
| 229412_at    | 0.99 | 0.94 | PA   | 91.80   | 2.12 | 0.00 | P   | 192.07  | TBN        | 6p21.1        |
| 205510_s_at  | 1.00 | 0.96 | P    | 54.07   | 2.12 | 0.02 | P   | 113.00  | FLJ10038   | 15q15.3       |
| 34685_at     | 0.98 | 0.96 | P    | 116.77  | 2.12 | 0.01 | PA  | 307.27  | TREX1      | 3q21-q21.2    |
| 45714_at     | 0.99 | 0.92 | P    | 116.77  | 2.12 | 0.00 | P   | 242.40  | HCFC1R1    | 16p13.3       |
| 208949_s_at  | 1.00 | 0.99 | P    | 2424.83 | 2.12 | 0.00 | P   | 5065.07 | LGALS3     | 14q21-q22     |
| 215706_x_at  | 0.99 | 0.94 | PA   | 377.63  | 2.12 | 0.01 | P   | 787.73  | ZYX        | 7q32          |
| 1555394_s_at | 0.99 | 0.93 | PA   | 99.43   | 2.12 | 0.00 | P   | 208.00  | LOC113251  | 12q13.12      |
| 215134_at    | 0.99 | 0.97 | A    | 64.70   | 2.12 | 0.01 | P   | 97.53   | FKHL1      | 10q26         |
| 222270_at    | 0.99 | 0.92 | P    | 49.53   | 2.11 | 0.03 | P   | 104.57  | KIAA1387   | 2p16.2        |
| 204628_s_at  | 1.00 | 0.95 | A    | 51.97   | 2.11 | 0.00 | P   | 108.43  | ITGB3      | 17q21.32      |
| 231784_s_at  | 1.00 | 0.95 | P    | 295.70  | 2.11 | 0.01 | P   | 616.50  | FZP56400   | 8q22.3        |
| 243751_at    | 0.99 | 0.91 | P    | 26.03   | 2.11 | 0.01 | P   | 54.33   |            |               |
| 223617_x_at  | 1.00 | 0.98 | P    | 212.33  | 2.11 | 0.01 | P   | 442.10  | ATAD3A     | 1p36.33       |
| 201186_at    | 1.00 | 0.97 | P    | 302.87  | 2.11 | 0.01 | P   | 628.07  | LRPAP1     | 4p16.3        |
| 218984_at    | 1.00 | 0.97 | P    | 461.23  | 2.11 | 0.00 | P   | 957.87  | FLJ20485   | 7q22.2        |
| 229697_at    | 1.00 | 0.96 | A    | 44.03   | 2.11 | 0.00 | PA  | 91.50   | HIRIP3     | 16p12.1       |
| 1554638_at   | 1.00 | 0.97 | P    | 63.67   | 2.11 | 0.02 | P   | 132.47  | ZFYVE16    | 5p15.2-q14.3  |
| 222277_at    | 1.00 | 0.97 | A    | 67.70   | 2.11 | 0.01 | P   | 194.01  |            |               |
| 201805_at    | 1.00 | 1.00 | P    | 352.37  | 2.11 | 0.00 | P   | 731.80  | PRKAG1     | 12q12-q14     |
| 209760_at    | 0.99 | 0.94 | P,M  | 92.30   | 2.11 | 0.00 | P   | 190.60  | KIAA0922   | 4q31.3        |
| 222886_at    | 1.00 | 0.95 | P    | 38.93   | 2.11 | 0.02 | P   | 81.30   | FLJ22609   | 3q11.2        |
| 214718_at    | 1.00 | 0.96 | P    | 266.53  | 2.11 | 0.03 | P   | 557.73  | ODAG       | 7q21-q22      |
| 228851_at    | 1.00 | 0.96 | P    | 246.33  | 2.10 | 0.01 | P   | 506.33  | LOC81137   | 5q22.2        |
| 224811_at    | 1.00 | 0.95 | P    | 457.43  | 2.10 | 0.00 | P   | 948.13  |            |               |
| 239292_at    | 1.00 | 0.97 | PA   | 24.53   | 2.10 | 0.02 | P   | 51.30   |            |               |
| 204778_x_at  | 0.99 | 0.94 | A    | 54.53   | 2.10 | 0.01 | P   | 113.30  | HOXB7      | 17q21.3       |
| 225426_at    | 1.00 | 0.95 | P    | 168.43  | 2.10 | 0.00 | P   | 350.07  | PPP6C      | 9q34.1        |
| 58780_s_at   | 1.00 | 0.96 | PA   | 16.80   | 2.10 | 0.01 | P   | 96.77   | FLJ10357   | 14q11.2       |
| 221203_s_at  | 1.00 | 0.95 | P    | 131.93  | 2.10 | 0.01 | P   | 273.63  | FLJ10201   | 3q27.3        |
| 208722_s_at  | 1.00 | 0.96 | P    | 500.03  | 2.10 | 0.00 | P   | 1034.70 | ANAPC5     | 12q24.31      |
| 230970_at    | 0.98 | 0.91 | PA   | 25.93   | 2.10 | 0.03 | P   | 54.30   |            |               |
| 225221_at    | 1.00 | 0.98 | P    | 530.73  | 2.10 | 0.00 | P   | 1095.27 |            |               |
| 218898_at    | 1.00 | 0.99 | P    | 221.53  | 2.10 | 0.00 | P   | 457.53  | CT120      | 17p13.3       |
| 218212_s_at  | 0.99 | 0.93 | P    | 318.50  | 2.10 | 0.00 | P   | 659.83  | MOC52      | 5q11          |
| 204252_at    | 1.00 | 0.96 | P    | 505.83  | 2.10 | 0.00 | P   | 1042.67 | CDK2       | 12q13         |
| 239742_at    | 0.98 | 0.91 | P    | 144.23  | 2.10 | 0.03 | P   | 301.67  | TULP4      | 6q25-q26      |
| 201889_at    | 1.00 | 0.95 | P    | 880.13  | 2.10 | 0.00 | P   | 1818.00 | JAM3C      | 7q21.1-q31.1  |
| 214037_s_at  | 0.99 | 0.93 | P    | 40.10   | 2.10 | 0.01 | P   | 83.27   | JM1        | xp11.23       |
| 203367_at    | 1.00 | 0.97 | P    | 285.47  | 2.09 | 0.00 | P   | 588.47  | DUSP14     | 17q12         |
| 224869_s_at  | 0.99 | 0.92 | P    | 381.87  | 2.09 | 0.01 | P   | 790.87  | MRPS25     | 3p25          |
| 235079_at    | 0.99 | 0.95 | P    | 172.30  | 2.09 | 0.02 | P   | 357.10  |            |               |
| 243815_at    | 0.99 | 0.92 | MA   | 46.50   | 2.09 | 0.02 | P   | 96.77   | PGBD4      | 15q13.2       |
| 227917_at    | 1.00 | 0.98 | P    | 72.03   | 2.09 | 0.00 | P   | 148.43  |            |               |
| 201657_at    | 1.00 | 0.97 | P    | 140.80  | 2.09 | 0.00 | P   | 290.07  | ARL1       | 12q23.3       |
| 203834_s_at  | 1.00 | 0.97 | PA   | 176.17  | 2.09 | 0.00 | P   | 363.77  | TGOLN2     | 2p11.2        |
| 201206_s_at  | 1.00 | 1.00 | P    | 159.73  | 2.09 | 0.01 | P   | 328.97  | RRBP1      | 20p12         |
| 201114_x_at  | 1.00 | 0.98 | P    | 1322.83 | 2.09 | 0.00 | P   | 2720.83 | PSMA7      | 20q13.33      |
| 203183_s_at  | 1.00 | 0.96 | P    | 120.87  | 2.09 | 0.01 | P   | 250.93  | SMARCD1    | 12q13.14      |
| 1559820_at   | 1.00 | 0.95 | A    | 40.97   | 2.09 | 0.02 | PA  | 85.27   | APG10L     | 5q14.1        |
| 212276_at    | 1.00 | 0.96 | P    | 157.97  | 2.09 | 0.00 | P   | 325.10  | LPIN1      | 2p25.1        |
| 1566739_at   | 0.99 | 0.93 | A    | 21.23   | 2.09 | 0.01 | PA  | 43.97   | PLCE1      | 10q23         |
| 219049_at    | 1.00 | 0.96 | P    | 189.43  | 2.09 | 0.00 | P   | 388.20  | CHG        | 8p21.3        |
| 219262_at    | 0.99 | 0.91 | P    | 40.80   | 2.09 | 0.02 | P   | 84.90   | SUV39H2    | 10p13         |
| 201949_x_at  | 0.99 | 0.93 | P    | 709.93  | 2.09 | 0.01 | P   | 1452.67 | CAPZB      | 1p36.1        |
| 201580_s_at  | 1.00 | 0.97 | P    | 450.07  | 2.08 | 0.00 | P   | 922.77  | DJ971N18.1 | 20p12         |
| 207396_s_at  | 0.99 | 0.95 | P    | 513.47  | 2.08 | 0.00 | P   | 1059.37 | ALG3       | 3q27.3        |
| 237176_at    | 0.99 | 0.94 | PA   | 64.87   | 2.08 | 0.00 | P   | 133.53  |            |               |
| 1556925_at   | 0.99 | 0.93 | P    | 19.73   | 2.08 | 0.01 | P   | 40.70   | CSPG6      | 10q25         |
| 228499_at    | 0.99 | 0.95 | A    | 88.97   | 2.08 | 0.02 | P   | 182.90  | PFKFB4     | 3p21-p22      |
| 205570_at    | 1.00 | 0.96 | PA   | 62.07   | 2.08 | 0.00 | P   | 127.30  | PIPSK2A    | 10p12.32      |
| 229744_at    | 0.99 | 0.93 | P    | 195.23  | 2.08 | 0.01 | P   | 404.80  | SSFA2      | 2q32.1        |
| 218158_s_at  | 0.99 | 0.93 | P    | 157.47  | 2.08 | 0.00 | P   | 323.40  | APPL       | 3p21.1-p14.3  |
| 213923_at    | 1.00 | 0.97 | P    | 1052.17 | 2.08 | 0.00 | P   | 2153.83 | RAP2B      | 3q25.2        |
| 31837_at     | 1.00 | 0.97 | P,M  | 442.63  | 2.08 | 0.00 | P   | 906.93  | BC002942   | 22q13.33      |
| 226780_s_at  | 1.00 | 0.96 | P    | 510.53  | 2.08 | 0.00 | P   | 1041.93 | HSPC288    | 7q34          |
| 218472_s_at  | 1.00 | 0.98 | P    | 235.60  | 2.08 | 0.00 | P   | 481.63  | PELO       | 5q11.2        |
| 209264_s_at  | 1.00 | 0.96 | PA   | 259.17  | 2.08 | 0.01 | P   | 531.67  | TM6SF7     | 11p15.5       |
| 224660_at    | 1.00 | 0.98 | P    | 132.67  | 2.08 | 0.00 | P   | 2702.80 | MGC14156   | 4q21.1        |
| 223299_at    | 0.99 | 0.93 | P    | 595.33  | 2.08 | 0.01 | P   | 1224.40 | LOC90701   | 18q21.32      |
| 212722_s_at  | 1.00 | 0.96 | P    | 148.97  | 2.08 | 0.01 | P   | 304.83  | PTDSR      | 17q25         |
| 227611_at    | 0.99 | 0.94 | P    | 36.70   | 2.07 | 0.00 | P   | 75.07   | FLJ25005   | 15q26.3       |
| 233015_at    | 1.00 | 0.96 | A    | 27.63   | 2.07 | 0.00 | P,M | 56.37   | MBNL1      | 3q25          |
| 235714_at    | 0.99 | 0.93 |      |         |      |      |     |         |            |               |

|              |      |      |       |         |      |      |       |         |           |                |
|--------------|------|------|-------|---------|------|------|-------|---------|-----------|----------------|
| 1559399_s_at | 1.00 | 0.96 | P     | 105.33  | 2.06 | 0.03 | P     | 216.23  | ZCCHC10   | 5q31.1         |
| 241953_at    | 1.00 | 0.97 | P,M,A | 11.07   | 2.06 | 0.00 | P,M   | 22.53   | FLJ25694  | 13q21.2        |
| 201105_at    | 1.00 | 0.96 | P     | 2764.97 | 2.06 | 0.00 | P     | 5637.70 | LGAL51    | 22q13.1        |
| 201765_s_at  | 1.00 | 0.96 | P     | 348.63  | 2.06 | 0.03 | P     | 709.27  | HEXA      | 15q24-q24      |
| 212244_at    | 1.00 | 0.97 | P     | 299.50  | 2.06 | 0.00 | P     | 606.77  | GRINL1A   | 15q22.1        |
| 226531_at    | 1.00 | 0.96 | M,A   | 194.83  | 2.06 | 0.00 | P     | 394.37  | FLJ14466  | 12q24.31       |
| 1567080_s_at | 1.00 | 0.99 | P     | 248.70  | 2.06 | 0.01 | P     | 507.47  | CLN6      | 15q22.31       |
| 217751_at    | 1.00 | 0.96 | P     | 866.83  | 2.06 | 0.00 | P     | 1757.40 | GSTK1     | 7q35           |
| 205601_s_at  | 0.99 | 0.94 | P,A   | 48.17   | 2.06 | 0.01 | P     | 97.40   | HOXB5     | 17q21.3        |
| 228088_at    | 0.99 | 0.93 | P     | 58.07   | 2.06 | 0.00 | P     | 117.40  |           |                |
| 201663_s_at  | 0.99 | 0.94 | P     | 868.53  | 2.06 | 0.00 | P     | 1768.70 | SMC4L1    | 3q26.1         |
| 226199_at    | 0.99 | 0.94 | P     | 77.07   | 2.06 | 0.00 | P     | 156.33  | MGC23937  | xq13.2         |
| 203525_s_at  | 0.99 | 0.93 | P     | 276.33  | 2.06 | 0.01 | P     | 962.33  | APC       | 5q21-q22       |
| 238667_at    | 0.99 | 0.94 | P     | 85.07   | 2.06 | 0.02 | P     | 174.10  |           |                |
| 212672_at    | 0.98 | 0.91 | P     | 161.20  | 2.06 | 0.03 | P     | 330.70  | ATM       | 11q22-q23      |
| 217911_s_at  | 0.99 | 0.93 | P     | 944.97  | 2.06 | 0.00 | P     | 1918.17 | BAG3      | 0q25.2-q26.2   |
| 205608_s_at  | 1.00 | 0.97 | P,A   | 44.63   | 2.06 | 0.00 | P     | 90.13   | ANGPT1    | 8q22.3-q23     |
| 238045_at    | 1.00 | 0.98 | P     | 57.43   | 2.06 | 0.00 | P     | 116.37  | LOC157378 | 8q24.13        |
| 230259_at    | 0.99 | 0.93 | P     | 88.80   | 2.06 | 0.00 | P     | 178.87  | C10orf125 | 10q26.3        |
| 227330_x_at  | 1.00 | 0.96 | P,A   | 51.80   | 2.05 | 0.03 | P     | 106.63  | LOC285458 | 4              |
| 203211_s_at  | 1.00 | 0.95 | P     | 767.23  | 2.05 | 0.00 | P     | 1553.73 | MTMR2     | 11q22          |
| 232216_at    | 1.00 | 0.98 | P     | 112.00  | 2.05 | 0.01 | P     | 226.63  | YME1L1    | 10p14          |
| 202114_at    | 1.00 | 0.97 | P     | 252.37  | 2.05 | 0.00 | P     | 509.20  | SNX2      | 5q23           |
| 218620_s_at  | 1.00 | 0.96 | A     | 106.07  | 2.05 | 0.00 | P     | 214.80  | HEMK      | 3q21.3         |
| 202454_s_at  | 1.00 | 0.97 | P     | 350.33  | 2.05 | 0.00 | P     | 707.10  | ERBB3     | 12q13          |
| 206583_at    | 0.99 | 0.94 | P,A   | 85.43   | 2.05 | 0.01 | P     | 172.67  | FLJ20344  | xp11.3         |
| 217918_at    | 1.00 | 0.98 | P     | 1262.63 | 2.05 | 0.00 | P     | 2547.90 | DNCL2A    | 20q11.21       |
| 208946_s_at  | 1.00 | 0.96 | P     | 465.80  | 2.05 | 0.00 | P     | 940.70  | BECN1     | 17q21          |
| 241384_s_at  | 0.99 | 0.93 | P     | 338.87  | 2.05 | 0.00 | P     | 89.40   | MGC40579  | 3q23           |
| 223388_s_at  | 1.00 | 0.99 | A     | 63.70   | 2.05 | 0.00 | P     | 128.30  | ZFYVE1    | 14q22-q24      |
| 1554557_at   | 1.00 | 0.96 | P     | 45.93   | 2.05 | 0.02 | P     | 93.30   | ATP11B    | 3q27           |
| 1555131_a_at | 1.00 | 0.96 | A     | 77.47   | 2.05 | 0.01 | P     | 157.33  | PER3      | 1p36.23        |
| 207661_s_at  | 0.98 | 0.91 | A     | 26.40   | 2.04 | 0.01 | P     | 53.60   | SH5MD1    | 10q25.1        |
| 227893_at    | 1.00 | 0.99 | P     | 87.20   | 2.04 | 0.00 | P     | 175.27  | WDR20     | 14q32.33       |
| 205411_at    | 0.98 | 0.91 | P,A   | 54.70   | 2.04 | 0.03 | P     | 113.13  | STK4      | 0q11.2-q13.2   |
| 235320_at    | 1.00 | 0.96 | P     | 85.57   | 2.04 | 0.01 | P     | 172.10  | ARL6      | 3q12.1         |
| 212522_at    | 0.99 | 0.93 | P     | 313.50  | 2.04 | 0.01 | P     | 632.77  | PDE8A     | 15q25.2        |
| 219999_at    | 0.99 | 0.91 | P     | 44.43   | 2.04 | 0.01 | P     | 86.13   | MAN2A2    | 15q26.1        |
| 230045_at    | 1.00 | 0.96 | P     | 132.73  | 2.04 | 0.00 | P     | 114.07  |           |                |
| 227107_at    | 1.00 | 0.96 | P     | 363.17  | 2.04 | 0.01 | P     | 728.00  | PANX1     | 11q21          |
| 201835_s_at  | 0.99 | 0.94 | A     | 61.40   | 2.04 | 0.00 | P     | 124.03  | PRKAB1    | 12q24.1        |
| 209028_s_at  | 1.00 | 0.97 | P     | 292.63  | 2.04 | 0.02 | P     | 590.33  | ABI1      | 10p11.2        |
| 224825_at    | 1.00 | 0.96 | P,M,A | 166.80  | 2.04 | 0.00 | P     | 336.40  | DNTT1P    | 20q13.12       |
| 238056_at    | 0.99 | 0.93 | P     | 132.80  | 2.04 | 0.00 | P     | 287.83  |           |                |
| 1555001_s_at | 0.99 | 0.94 | P     | 233.40  | 2.04 | 0.00 | P     | 466.30  | MGC12197  | 3q25.32        |
| 235987_at    | 0.99 | 0.93 | M,A   | 14.43   | 2.04 | 0.02 | P     | 29.17   | PRKXP1    | 15q26          |
| 226569_s_at  | 0.99 | 0.93 | P     | 108.33  | 2.04 | 0.01 | P     | 217.17  | CHTF18    | 16p13.3        |
| 224332_s_at  | 0.99 | 0.94 | P     | 423.13  | 2.04 | 0.00 | P     | 844.80  | MRPL43    | 10q24.31       |
| 219184_s_at  | 0.99 | 0.93 | A     | 99.70   | 2.04 | 0.01 | P     | 199.47  | TMM22     | 17p13          |
| 228685_at    | 1.00 | 0.96 | P     | 38.80   | 2.04 | 0.01 | P,A   | 77.80   |           |                |
| 236402_at    | 1.00 | 0.98 | P,M,A | 47.40   | 2.04 | 0.00 | P     | 95.00   | BRAF      | 7q34           |
| 233995_at    | 0.98 | 0.91 | P     | 70.57   | 2.03 | 0.03 | P     | 142.47  |           |                |
| 238691_at    | 1.00 | 0.96 | A     | 25.70   | 2.03 | 0.00 | P     | 51.60   | LOC283596 | 14q32.2        |
| 232475_at    | 1.00 | 0.96 | P     | 79.70   | 2.03 | 0.00 | P     | 160.07  | MGC45866  | 15q26.1        |
| 213113_s_at  | 1.00 | 0.96 | P     | 935.47  | 2.03 | 0.00 | P     | 1865.33 | SLC43A3   | 11q11          |
| 212020_s_at  | 1.00 | 0.97 | P     | 299.57  | 2.03 | 0.01 | P     | 607.10  | MKI67     | 10q25-qter     |
| 238015_at    | 1.00 | 0.95 | P     | 143.87  | 2.03 | 0.00 | P     | 288.33  | LOC201725 | 4q32.1         |
| 202733_at    | 1.00 | 0.98 | P     | 190.37  | 2.03 | 0.00 | P     | 380.53  | PAHA2     | 5q31           |
| 217917_s_at  | 1.00 | 0.98 | P     | 300.13  | 2.03 | 0.00 | P     | 195.60  | DNCL2A    | 20q11.21       |
| 241938_at    | 0.99 | 0.95 | P,M   | 49.30   | 2.03 | 0.01 | P     | 98.83   | QKI       | 6q26-27        |
| 222233_s_at  | 0.99 | 0.94 | P     | 126.57  | 2.03 | 0.00 | P     | 253.50  | DCLRE1C   | 10p13          |
| 201271_s_at  | 1.00 | 0.98 | P     | 428.90  | 2.03 | 0.00 | P     | 856.17  | RALY      | 1q11.21-q11.23 |
| 241924_at    | 0.99 | 0.93 | P     | 132.87  | 2.03 | 0.01 | P     | 266.63  |           |                |
| 1553354_s_at | 0.99 | 0.92 | P     | 51.97   | 2.03 | 0.01 | P     | 103.93  | MSI2      | 17q23.2        |
| 201682_at    | 1.00 | 0.96 | P     | 548.30  | 2.03 | 0.02 | P     | 1100.07 | PMPCB     | 7q22-q32       |
| 222767_s_at  | 0.99 | 0.95 | P     | 90.57   | 2.03 | 0.00 | P     | 180.73  | FLJ21415  | 12q24.22       |
| 224931_at    | 1.00 | 0.95 | M,A   | 168.40  | 2.03 | 0.00 | P     | 335.77  | SLC41A3   | 3q21.2         |
| 232889_at    | 0.99 | 0.93 | P     | 248.57  | 2.03 | 0.01 | P     | 494.23  | LOC153651 | 5q13.2         |
| 216913_s_at  | 1.00 | 0.96 | P,M,A | 136.40  | 2.03 | 0.00 | P     | 270.13  | KIAA0690  | 10q24.2        |
| 223186_at    | 0.99 | 0.95 | P     | 276.40  | 2.03 | 0.00 | P     | 552.47  | Kua       | 20q13.2        |
| 222598_s_at  | 0.99 | 0.93 | A     | 51.70   | 2.03 | 0.01 | P     | 103.07  | NAV2      | 11p15.1        |
| 201377_at    | 1.00 | 0.98 | P     | 434.50  | 2.02 | 0.00 | P     | 865.43  | NICE-4    | 1q22           |
| 203510_at    | 1.00 | 0.95 | P     | 714.60  | 2.02 | 0.01 | P     | 1427.57 | MET       | 7q31           |
| 202260_s_at  | 1.00 | 0.97 | P     | 318.47  | 2.02 | 0.02 | P     | 643.13  | STXBP1    | 9q41.1         |
| 212282_at    | 1.00 | 0.96 | P     | 499.67  | 2.02 | 0.00 | P     | 996.40  | MAC30     | 17q11.2        |
| 210771_at    | 0.99 | 0.91 | P     | 17.17   | 2.02 | 0.01 | P     | 34.37   | PPARA     | 22q13.31       |
| 212067_s_at  | 0.99 | 0.93 | A     | 20.23   | 2.02 | 0.01 | P     | 40.37   | C1R       | 12p13          |
| 200622_x_at  | 1.00 | 0.97 | P     | 355.53  | 2.02 | 0.00 | P     | 708.47  | CALM3     | 9q13.2-q13.3   |
| 203094_at    | 1.00 | 0.96 | P     | 405.93  | 2.02 | 0.00 | P     | 809.23  | MAD2L1BP  | 6p21.1         |
| 226924_at    | 0.99 | 0.95 | P     | 94.93   | 2.02 | 0.01 | P     | 189.27  |           |                |
| 221912_s_at  | 0.99 | 0.95 | A     | 50.23   | 2.02 | 0.03 | P     | 100.57  | MGC1203   | p36.11-p34.2   |
| 201016_at    | 0.99 | 0.94 | P     | 883.77  | 2.02 | 0.00 | P     | 1760.93 | EIF1AX    | xp22.13        |
| 203314_at    | 1.00 | 0.95 | P     | 129.57  | 2.02 | 0.01 | P     | 256.90  | PGPL      | 22.33; vp11.32 |
| 201281_at    | 1.00 | 0.98 | P     | 1111.27 | 2.02 | 0.00 | P     | 2208.03 | ADRM1     | 20q13.33       |
| 206289_at    | 0.99 | 0.95 | P     | 105.53  | 2.02 | 0.02 | P     | 210.77  | HOXA4     | 7p15-p14       |
| 206412_at    | 1.00 | 0.97 | A     | 67.63   | 2.02 | 0.02 | P,M   | 135.20  | FER       | 5q21           |
| 208914_at    | 1.00 | 0.96 | M,A   | 155.87  | 2.02 | 0.00 | P     | 309.13  | GGA2      | 16p12          |
| 203832_at    | 1.00 | 0.99 | P     | 527.20  | 2.02 | 0.00 | P     | 1044.43 | SNRPF     | 12q23.1        |
| 225104_at    | 1.00 | 0.96 | P     | 164.70  | 2.01 | 0.01 | P     | 328.30  | ZNF598    | 16p13.3        |
| 202243_s_at  | 1.00 | 0.99 | P     | 1967.63 | 2.01 | 0.00 | P     | 3900.77 | PSMB4     | 1q21           |
| 36994_at     | 0.99 | 0.94 | P     | 1376.80 | 2.01 | 0.00 | P     | 2743.23 | ATP6VOC   | 16p13.3        |
| 221764_at    | 0.99 | 0.94 | P,A   | 208.17  | 2.01 | 0.00 | P     | 415.43  | C19orf22  | 19p13.3        |
| 218495_at    | 1.00 | 0.98 | P     | 899.20  | 2.01 | 0.00 | P     | 1780.80 | UXT       | o11.23-p11.22  |
| 212373_at    | 0.99 | 0.93 | P     | 118.07  | 2.01 | 0.01 | P     | 235.07  | FEM1B     | 15q22          |
| 226395_at    | 0.99 | 0.93 | P     | 161.03  | 2.01 | 0.03 | P     | 322.60  | LOC286170 | 8p11.21        |
| 238841_at    | 1.00 | 1.00 | P     | 63.80   | 2.01 | 0.01 | P     | 126.63  | PTPDC1    | 9q22.32        |
| 224936_at    | 1.00 | 0.98 | P     | 886.73  | 2.01 | 0.00 | P     | 1753.37 | EIF2S3    | q22.2-p22.1    |
| 1558459_s_at | 0.99 | 0.94 | A     | 94.03   | 2.01 | 0.00 | P     | 185.73  |           |                |
| 212792_at    | 0.99 | 0.92 | P     | 175.77  | 2.01 | 0.00 | P     | 348.97  |           |                |
| 226413_at    | 1.00 | 1.00 | P     | 160.30  | 2.01 | 0.01 | P     | 317.47  | KIAA0877  | 7p14.3-p14.2   |
| 229835_s_at  | 1.00 | 0.96 | P     | 182.57  | 2.01 | 0.00 | P     | 361.43  | C20orf45  | 20q13.32       |
| 235472_at    | 0.99 | 0.92 | P     | 51.57   | 2.01 | 0.01 | P     | 103.00  | FUT10     | 8p12           |
| 241727_x_at  | 1.00 | 0.97 | A     | 87.20   | 2.01 | 0.00 | P     | 172.13  | LOC200895 | 3q11.2         |
| 1552278_a_at | 1.00 | 0.98 | A     | 31.23   | 2.01 | 0.02 | P     | 62.13   | MGC9584   | 17q11.2        |
| 202405_at    | 0.99 | 0.95 | P     | 80.80   | 2.01 | 0.01 | P     | 159.23  |           |                |
| 201231_s_at  | 1.00 | 0.99 | P     | 2900.57 | 2.01 | 0.00 | P     | 5730.03 | ENO1      | 1p36.3-p36.2   |
| 218926_at    | 1.00 | 0.98 | P     | 88.50   | 2.01 | 0.00 | P     | 174.73  | MYNN      | 3q26.31        |
| 229647_at    | 1.00 | 0.97 | P     | 204.20  | 2.00 | 0.01 | P     | 403.27  |           |                |
| 234594_at    | 1.00 | 0.96 | P     | 58.83   | 2.00 | 0.01 | P     | 116.23  | C14orf85  | 14             |
| 223387_at    | 1.00 | 0.98 | P,M   | 199.07  | 2.00 | 0.01 | P     | 392.00  | ZFYVE1    | 14q22-q24      |
| 227841_at    | 0.99 | 0.93 | P,A   | 133.27  | 2.00 | 0.01 | P,M,A | 261.90  |           |                |
| 223346_at    | 1.00 | 0.97 | P     | 151.93  | 2.00 | 0.00 | P     | 299.37  | VPS18     | 15q14-q15      |
| 202142_at    | 1.00 | 0.98 | P     | 787.93  | 2.00 | 0.00 | P     | 1552.20 | COPS8     | 2q37.3         |
