# Supplementary material for: Multi-Platform Whole-Genome Microarray Analyses Refine the Epigenetic Signature of Breast Cancer Metastasis with Gene Expression and Copy Number
Source: PubMed Central journal article supplement (PMC2801616; doi:10.1371/journal.pone.0008665), 2010-01-13
Supplement: pone.0008665.s006.pdf [file pone.0008665.s006.pdf]

**Supplemental Table 5: Genes significantly Decreased in expression, LN vs GFP**

| Cell line (*) | 468GFP          |                |       |         | 468GFP-LN       |                |       |       | Common    | Map             |
|---------------|-----------------|----------------|-------|---------|-----------------|----------------|-------|-------|-----------|-----------------|
|               | Ratio to 468GFP | t-test P-value | Flags | Raw     | Ratio to 468GFP | t-test P-value | Flags | Raw   |           |                 |
| Systematic    |                 |                |       |         |                 |                |       |       |           |                 |
| 205709_s_at   | 1.00            | 0.98           | P     | 539.87  | 0.01            | 1.00           | A     | 1.10  | CDS1      | 4q21.23         |
| 205916_at     | 0.98            | 0.91           | P     | 696.33  | 0.01            | 1.00           | A     | 3.43  | S100A7    | 1q21            |
| 201839_s_at   | 1.00            | 0.97           | P     | 3576.00 | 0.01            | 1.00           | A     | 7.87  | TACSTD1   | 2p21            |
| 201951_at     | 0.95            | 0.85           | P     | 503.97  | 0.01            | 1.00           | A     | 2.60  | ALCAM     | 3q13.1          |
| 202286_s_at   | 1.00            | 0.98           | P     | 3076.10 | 0.01            | 1.00           | A     | 7.53  | TACSTD2   | 1p32-p31        |
| 202437_s_at   | 0.99            | 0.95           | P     | 4115.27 | 0.01            | 1.00           | A     | 5.17  | CYP1B1    | 2p21            |
| 201983_s_at   | 0.99            | 0.93           | P     | 5577.07 | 0.01            | 1.00           | A     | 14.07 | EGFR      | 7p12            |
| 205668_at     | 1.00            | 0.97           | P     | 279.00  | 0.01            | 1.00           | A     | 1.83  | LY75      | 2q24            |
| 202546_at     | 1.00            | 0.99           | P     | 1207.63 | 0.01            | 1.00           | A     | 3.63  | VAMP8     | 2p12-p11.2      |
| 200606_at     | 1.00            | 0.96           | P     | 3626.30 | 0.01            | 1.00           | P,A   | 21.07 | DSP       | 6p24            |
| 206023_at     | 1.00            | 0.98           | P     | 959.43  | 0.01            | 1.00           | A     | 1.77  | NMU       | 4q12            |
| 206378_at     | 1.00            | 0.97           | P     | 3826.73 | 0.01            | 1.00           | A     | 11.23 | SCGB2A2   | 11q13           |
| 65517_at      | 1.00            | 1.00           | P     | 1369.27 | 0.01            | 1.00           | A     | 10.20 | AP1M2     | 19p13.2         |
| 205980_s_at   | 0.99            | 0.93           | P     | 897.83  | 0.01            | 1.00           | A     | 3.87  | ARHGAP8   | 22q13.31        |
| 205928_at     | 1.00            | 0.96           | P     | 450.50  | 0.01            | 1.00           | A     | 2.67  | ZNF443    | 19p13.2         |
| 201427_s_at   | 1.00            | 0.95           | P     | 441.03  | 0.01            | 1.00           | A     | 1.53  | SEPP1     | 5q31            |
| 201015_s_at   | 1.00            | 0.96           | P     | 1639.27 | 0.01            | 1.00           | A     | 5.27  | JUP       | 17q21           |
| 201131_s_at   | 1.00            | 1.00           | P     | 1571.40 | 0.01            | 1.00           | A     | 4.63  | CDH1      | 16q22.1         |
| 201650_at     | 1.00            | 1.00           | P     | 5467.43 | 0.01            | 1.00           | A     | 0.83  | KRT19     | 17q21.2         |
| 204750_s_at   | 1.00            | 0.97           | P     | 261.37  | 0.01            | 1.00           | A     | 2.30  | DSC2      | 18q12.1         |
| 203608_at     | 1.00            | 0.98           | P     | 554.13  | 0.01            | 1.00           | A     | 1.27  | ALDH5A1   | 6p22.2-p22.3    |
| 203215_s_at   | 0.99            | 0.95           | P     | 366.60  | 0.01            | 1.00           | A     | 1.70  | MYO6      | 6q13            |
| 203571_s_at   | 1.00            | 0.97           | P     | 198.23  | 0.01            | 1.00           | A     | 1.43  | C10orf116 | 10q23.31        |
| 203917_at     | 1.00            | 0.96           | P     | 1045.50 | 0.01            | 1.00           | A     | 8.53  | CXADR     | 21q21.1         |
| 204070_at     | 1.00            | 0.96           | P     | 1944.63 | 0.01            | 1.00           | A     | 11.77 | RARRES3   | 11q23           |
| 204351_at     | 1.00            | 0.95           | P     | 1378.43 | 0.01            | 1.00           | A     | 4.50  | S100P     | 4p16            |
| 203953_s_at   | 0.98            | 0.91           | P     | 313.83  | 0.01            | 1.00           | A     | 1.07  | CLDN3     | 7q11.23         |
| 204664_at     | 0.99            | 0.95           | P,A   | 364.83  | 0.01            | 1.00           | A     | 1.80  | ALPP      | 2q37            |
| 266_s_at      | 1.00            | 0.97           | P     | 2977.27 | 0.01            | 1.00           | A     | 2.67  | CD24      | 6q21            |
| 202669_s_at   | 0.99            | 0.93           | P     | 522.23  | 0.01            | 1.00           | A     | 3.13  | EFNB2     | 13q33           |
| 202599_s_at   | 1.00            | 0.95           | P     | 1603.40 | 0.01            | 1.00           | A     | 9.07  | NRIP1     | 21q11.2         |
| 202600_s_at   | 0.99            | 0.92           | P     | 1401.20 | 0.01            | 1.00           | A     | 3.87  | NRIP1     | 21q11.2         |
| 202890_at     | 1.00            | 0.98           | P     | 802.87  | 0.01            | 1.00           | A     | 0.43  | MAP7      | 6q23.3          |
| 203180_at     | 0.99            | 0.94           | P     | 3928.07 | 0.01            | 1.00           | A     | 7.20  | ALDH1A3   | 15q26.3         |
| 205157_s_at   | 1.00            | 0.97           | P     | 2251.60 | 0.01            | 1.00           | A     | 8.30  | KRT17     | 17q12-q21       |
| 205422_s_at   | 0.99            | 0.94           | P     | 272.33  | 0.01            | 1.00           | A     | 0.77  | ITGBL1    | 13q33           |
| 203028_s_at   | 1.00            | 0.98           | P,A   | 1742.70 | 0.01            | 1.00           | A     | 9.30  | CYBA      | 16q24           |
| 204400_at     | 1.00            | 0.99           | P     | 243.23  | 0.01            | 1.00           | A     | 1.67  | EFS       | 14q11.2-q12     |
| 241950_at     | 1.00            | 0.95           | P     | 579.20  | 0.01            | 1.00           | A     | 4.20  |           |                 |
| 223631_s_at   | 0.97            | 0.88           | P     | 497.10  | 0.01            | 1.00           | A     | 2.47  | C19orf33  | 19q13.13        |
| 222450_at     | 1.00            | 0.95           | P,A   | 1001.20 | 0.01            | 1.00           | A     | 1.77  | TMEPAI    | 20q13.31-q13.33 |
| 223136_at     | 1.00            | 0.98           | P     | 664.90  | 0.01            | 1.00           | A     | 3.07  | AIG1      | 6q24.1          |
| 224609_at     | 0.99            | 0.93           | P     | 2518.37 | 0.01            | 1.00           | A     | 5.83  | CTL2      | 19p13.1         |
| 225911_at     | 0.99            | 0.94           | P     | 551.93  | 0.01            | 1.00           | A     | 3.97  | LOC255743 | 4q25            |
| 226482_s_at   | 1.00            | 0.97           | P     | 2449.33 | 0.01            | 1.00           | A     | 5.47  | F11R      | 1q21.2-q21.3    |
| 225175_s_at   | 1.00            | 0.98           | P     | 2733.47 | 0.01            | 1.00           | A     | 2.07  | CTL2      | 19p13.1         |
| 225645_at     | 1.00            | 0.98           | P     | 2438.20 | 0.01            | 1.00           | A     | 4.63  | EHF       | 11p12           |
| 219850_s_at   | 1.00            | 0.96           | P     | 369.87  | 0.01            | 1.00           | A     | 1.57  | EHF       | 11p12           |
| 220145_at     | 1.00            | 0.99           | P     | 96.13   | 0.01            | 1.00           | A     | 0.50  | FLJ21159  | 4q31.3          |
| 218885_s_at   | 1.00            | 0.98           | P     | 320.53  | 0.01            | 1.00           | A     | 2.40  | GALNT12   | 9q31.1          |
| 218963_s_at   | 1.00            | 0.95           | P     | 1048.90 | 0.01            | 1.00           | A     | 6.07  | KRT23     | 17q21.2         |
| 220520_s_at   | 1.00            | 0.97           | P     | 124.83  | 0.01            | 1.00           | A     | 0.77  | FLJ20130  | xq22.3          |
| 221872_at     | 1.00            | 0.96           | P     | 4082.57 | 0.01            | 1.00           | A     | 10.73 | RARRES1   | 3q25.32         |
| 222062_at     | 1.00            | 0.97           | P     | 258.27  | 0.01            | 1.00           | A     | 1.43  | IL27RA    | 19p13.11        |
| 221024_s_at   | 1.00            | 0.97           | P     | 342.20  | 0.01            | 1.00           | A     | 2.97  | SLC2A10   | 20q13.1         |
| 221609_s_at   | 1.00            | 0.96           | P     | 1285.07 | 0.01            | 1.00           | A     | 5.00  | WNT6      | 2q35            |
| 226535_at     | 1.00            | 0.99           | P     | 808.43  | 0.01            | 1.00           | A     | 2.77  | ITGB6     | 2q24.3          |
| 231618_s_at   | 1.00            | 0.96           | P     | 944.37  | 0.01            | 1.00           | A     | 2.73  | MGC33329  | 7p12.3          |
| 231856_at     | 0.98            | 0.89           | P     | 170.63  | 0.01            | 1.00           | A     | 1.00  | KIAA1244  | 6q23.3          |
| 230641_at     | 0.98            | 0.91           | P     | 234.17  | 0.01            | 1.00           | A     | 1.30  |           |                 |
| 230875_s_at   | 1.00            | 0.96           | P     | 776.23  | 0.01            | 1.00           | A     | 1.87  | ATP11A    | 13q34           |
| 232165_at     | 1.00            | 0.98           | P     | 302.30  | 0.01            | 1.00           | A     | 1.50  | EPPK1     | 8q24.3          |
| 234310_s_at   | 0.96            | 0.86           | P     | 738.43  | 0.01            | 1.00           | A     | 4.10  | SUSD2     | 22q11-q12       |
| 235626_at     | 1.00            | 0.99           | P     | 448.80  | 0.01            | 1.00           | A     | 3.43  | CAMK1D    | 10p14           |
| 232541_at     | 1.00            | 0.99           | P     | 3491.80 | 0.01            | 1.00           | A     | 5.70  |           |                 |
| 232925_at     | 1.00            | 0.99           | P     | 982.70  | 0.01            | 1.00           | A     | 4.53  |           |                 |
| 227240_at     | 1.00            | 0.98           | P     | 504.50  | 0.01            | 1.00           | A     | 2.83  | NGEF      | 2q37            |
| 227556_at     | 1.00            | 0.98           | P     | 1680.43 | 0.01            | 1.00           | A     | 8.30  | NME7      | 1q24            |
| 226722_at     | 1.00            | 0.96           | P     | 262.63  | 0.01            | 1.00           | A     | 2.00  | FAM20C    | 7p22.3          |
| 227235_at     | 1.00            | 0.97           | P     | 218.90  | 0.01            | 1.00           | A     | 1.50  |           |                 |
| 1553423_a_at  | 0.99            | 0.94           | P     | 134.33  | 0.01            | 1.00           | A     | 0.57  | FLJ31952  | 17q21.1         |
| 229377_at     | 1.00            | 0.98           | P     | 625.40  | 0.01            | 1.00           | A     | 3.47  | GRTP1     | 13q34           |
| 1553132_a_at  | 0.98            | 0.91           | P     | 155.23  | 0.01            | 1.00           | A     | 0.30  | MTAC2D1   | 14q32.12        |
| 227947_at     | 1.00            | 0.96           | P     | 715.20  | 0.01            | 1.00           | A     | 1.83  | C6orf56   | 6q24.1          |
| 228072_at     | 1.00            | 0.99           | P     | 1195.93 | 0.01            | 1.00           | A     | 5.70  | SYT12     | 11q13.1         |
| 209581_at     | 1.00            | 0.96           | P     | 2317.50 | 0.01            | 1.00           | A     | 6.23  | HRASLS3   | 11q13.1         |
| 209587_at     | 0.99            | 0.94           | P     | 311.57  | 0.01            | 1.00           | A     | 1.00  | PITX1     | 5q31            |
| 209260_at     | 1.00            | 0.98           | P     | 904.43  | 0.01            | 1.00           | A     | 7.00  | SFN       | 1p35.3          |
| 209351_at     | 1.00            | 0.98           | P     | 2758.37 | 0.01            | 1.00           | A     | 3.50  | KRT14     | 17q12-q21       |
| 209602_s_at   | 0.99            | 0.94           | P     | 353.70  | 0.01            | 1.00           | A     | 1.43  | GATA3     | 10p15           |
| 209772_s_at   | 0.95            | 0.84           | P     | 1214.10 | 0.01            | 1.00           | A     | 3.03  | CD24      | 6q21            |
| 209792_s_at   | 0.99            | 0.94           | P     | 1164.60 | 0.01            | 1.00           | A     | 6.73  | KLK10     | 19q13.3-q13.4   |
| 209605_at     | 1.00            | 0.97           | P     | 1103.03 | 0.01            | 1.00           | A     | 9.77  | TST       | 22q13.1         |
| 209771_x_at   | 1.00            | 0.97           | P     | 4909.50 | 0.01            | 1.00           | A     | 19.77 | CD24      | 6q21            |
| 206546_at     | 0.96            | 0.87           | P     | 103.67  | 0.01            | 1.00           | A     | 0.53  | SYCP2     | 20q13.33        |
| 206683_at     | 1.00            | 0.95           | P     | 281.10  | 0.01            | 1.00           | A     | 1.63  | ZNF165    | 6p21.3          |
| 206391_at     | 0.99            | 0.92           | P     | 1577.87 | 0.01            | 1.00           | A     | 2.37  | RARRES1   | 3q25.32         |

|              |      |      |     |         |      |      |     |       |               |               |
|--------------|------|------|-----|---------|------|------|-----|-------|---------------|---------------|
| 206392_s_at  | 0.98 | 0.91 | P   | 3872.73 | 0.01 | 1.00 | A   | 3.90  | RARRES1       | 3q25.32       |
| 207169_x_at  | 1.00 | 0.99 | P   | 2721.47 | 0.01 | 1.00 | A   | 14.83 | DDR1          | 6p21.3        |
| 208650_s_at  | 0.99 | 0.94 | P   | 3063.90 | 0.01 | 1.00 | A   | 6.30  | CD24          | 6q21          |
| 209016_s_at  | 1.00 | 0.98 | P   | 4535.60 | 0.01 | 1.00 | A   | 1.87  | KRT7          | 12q12-q13     |
| 208091_s_at  | 1.00 | 0.99 | P   | 5033.30 | 0.01 | 1.00 | A   | 14.90 | DKFZP564K0822 | 7p11.2        |
| 208502_s_at  | 0.99 | 0.93 | P   | 377.77  | 0.01 | 1.00 | A   | 1.40  | PITX1         | 5q31          |
| 209885_at    | 0.99 | 0.92 | P   | 546.60  | 0.01 | 1.00 | A   | 2.90  | RHOD          | 11q14.3       |
| 216438_s_at  | 1.00 | 0.97 | P   | 5250.40 | 0.01 | 1.00 | M,A | 11.47 | TMSB4X        | xq21.3-q22    |
| 217762_s_at  | 1.00 | 0.98 | P   | 2044.03 | 0.01 | 1.00 | A   | 9.37  | RAB31         | 18p11.3       |
| 215172_at    | 0.98 | 0.91 | P   | 325.47  | 0.01 | 1.00 | A   | 1.37  | DKFZP566K0524 | 10q11.22      |
| 215729_s_at  | 1.00 | 0.96 | P   | 2166.23 | 0.01 | 1.00 | A   | 2.73  | VGLL1         | xq26.3        |
| 217763_s_at  | 1.00 | 0.99 | P   | 1166.10 | 0.01 | 1.00 | A   | 5.37  | RAB31         | 18p11.3       |
| 218729_at    | 0.99 | 0.93 | P   | 1157.30 | 0.01 | 1.00 | A   | 4.07  | LXN           | 3q25.32       |
| 218804_at    | 1.00 | 0.95 | P   | 747.20  | 0.01 | 1.00 | A   | 1.83  | TMEM16A       | 11q13.2       |
| 217764_s_at  | 1.00 | 0.98 | P   | 2323.80 | 0.01 | 1.00 | A   | 14.57 | RAB31         | 18p11.3       |
| 218312_s_at  | 0.99 | 0.93 | P   | 993.13  | 0.01 | 1.00 | A   | 7.17  | FLJ12895      | 19q13.43      |
| 211379_x_at  | 0.99 | 0.92 | P   | 407.27  | 0.01 | 1.00 | A   | 1.90  | B3GALT3       | 3q25          |
| 212148_at    | 1.00 | 0.96 | P   | 981.40  | 0.01 | 1.00 | A   | 6.43  | PBX1          | 1q23          |
| 210095_s_at  | 1.00 | 0.96 | P   | 1715.87 | 0.01 | 1.00 | A   | 6.23  | IGFBP3        | 7p13-p12      |
| 210715_s_at  | 1.00 | 0.99 | P   | 2457.40 | 0.01 | 1.00 | A   | 10.30 | SPINT2        | 19q13.1       |
| 212768_s_at  | 1.00 | 0.97 | P   | 187.57  | 0.01 | 1.00 | A   | 0.70  | GW112         | 13q14.2       |
| 213711_at    | 0.99 | 0.94 | P   | 2111.43 | 0.01 | 1.00 | A   | 8.33  | KRTHB1        | 12q13         |
| 214404_x_at  | 0.95 | 0.84 | P   | 1346.00 | 0.01 | 1.00 | A   | 10.70 | SPDEF         | 6p21.3        |
| 213506_at    | 1.00 | 0.95 | P   | 1105.20 | 0.01 | 1.00 | A   | 1.23  | F2RL1         | 5q13          |
| 213693_s_at  | 1.00 | 0.97 | P   | 528.70  | 0.01 | 1.00 | A   | 2.47  | MUC1          | 1q21          |
| 236489_at    | 0.99 | 0.92 | P   | 230.77  | 0.01 | 1.00 | A   | 1.57  |               |               |
| 204734_at    | 1.00 | 0.97 | P   | 244.13  | 0.01 | 0.00 | A   | 2.00  | KRT15         | 17q21.2       |
| 202790_at    | 0.86 | 0.75 | P   | 1495.10 | 0.01 | 0.00 | A   | 9.77  | CLDN7         | 17p13         |
| 231766_s_at  | 0.99 | 0.93 | P   | 177.37  | 0.01 | 0.00 | A   | 1.17  | COL12A1       | 6q12-q13      |
| 221690_s_at  | 1.00 | 0.98 | P   | 1093.43 | 0.01 | 0.00 | A   | 8.10  | NALP2         | 19q13.42      |
| 201820_at    | 1.00 | 0.99 | P   | 3294.47 | 0.01 | 0.00 | A   | 19.97 | KRT5          | 12q12-q13     |
| 227702_at    | 0.98 | 0.90 | P   | 584.30  | 0.01 | 0.00 | A   | 4.63  | CYP4X1        | 1p33          |
| 209369_at    | 0.99 | 0.94 | P   | 1353.70 | 0.01 | 0.00 | A   | 9.33  | ANXA3         | 4q13-q22      |
| 1560562_a_at | 1.00 | 0.99 | P   | 312.80  | 0.01 | 0.00 | A   | 2.13  | MGC48625      | 19q13.42      |
| 217388_s_at  | 0.99 | 0.94 | P   | 1995.87 | 0.01 | 0.00 | M,A | 19.43 | KYNU          | 2q22.3        |
| 238029_s_at  | 1.00 | 0.98 | P   | 332.10  | 0.01 | 0.00 | A   | 2.87  | SLC16A14      | 2q37.1        |
| 226039_at    | 1.00 | 0.97 | P   | 487.47  | 0.01 | 0.00 | A   | 4.27  | MGAT4A        | 2q12          |
| 226374_at    | 1.00 | 0.97 | P   | 1111.03 | 0.01 | 0.00 | A   | 8.40  |               |               |
| 227574_at    | 1.00 | 0.97 | P   | 1128.77 | 0.01 | 0.00 | A   | 10.03 | KIAA0657      | 2q36.1        |
| 206067_s_at  | 1.00 | 0.96 | P   | 504.27  | 0.01 | 0.00 | A   | 2.90  | WT1           | 11p13         |
| 208651_x_at  | 0.99 | 0.94 | P   | 2632.30 | 0.01 | 0.00 | A   | 26.50 | CD24          | 6q21          |
| 202826_at    | 1.00 | 0.99 | P   | 706.17  | 0.01 | 0.00 | A   | 5.10  | SPINT1        | 15q14         |
| 227480_at    | 1.00 | 0.99 | P   | 3149.47 | 0.01 | 0.00 | A   | 20.57 | SUSD2         | 22q11-q12     |
| 228707_at    | 1.00 | 0.97 | P   | 230.87  | 0.01 | 0.00 | A   | 2.03  | CLDN23        | 8p23.1        |
| 203836_s_at  | 0.99 | 0.92 | P   | 555.97  | 0.01 | 0.00 | A   | 4.17  | MAP3K5        | 6q22.33       |
| 218546_at    | 0.99 | 0.93 | P   | 490.00  | 0.01 | 0.00 | A   | 4.20  | FLJ14146      | 1q42.11       |
| 216905_s_at  | 1.00 | 0.97 | P   | 529.57  | 0.01 | 0.00 | A   | 4.53  | ST14          | 11q24-q25     |
| 238604_at    | 1.00 | 0.97 | P   | 1592.30 | 0.01 | 0.00 | P   | 14.30 |               |               |
| 203535_at    | 1.00 | 0.97 | P   | 823.60  | 0.01 | 0.00 | A   | 6.67  | S100A9        | 1q21          |
| 223349_s_at  | 1.00 | 0.96 | P   | 420.17  | 0.01 | 0.00 | A   | 3.23  | BOK           | 2q37.3        |
| 202489_s_at  | 1.00 | 0.97 | P   | 2715.33 | 0.01 | 0.00 | A   | 26.00 | FXYD3         | 19q13.13      |
| 209008_x_at  | 1.00 | 0.97 | P   | 3567.67 | 0.01 | 0.00 | M,A | 35.27 | KRT8          | 12q13         |
| 242277_at    | 0.78 | 0.70 | P   | 135.80  | 0.01 | 0.00 | A   | 1.07  | C6orf56       | 6q24.1        |
| 202718_at    | 0.99 | 0.94 | P   | 324.30  | 0.01 | 0.00 | A   | 2.90  | IGFBP2        | 2q33-q34      |
| 224650_at    | 1.00 | 0.96 | P   | 2044.17 | 0.01 | 0.00 | A   | 17.10 | MAL2          | 8q23          |
| 235698_at    | 0.99 | 0.94 | P   | 201.47  | 0.01 | 0.00 | A   | 2.10  | ZFP90         | 16q22.1       |
| 202435_s_at  | 0.95 | 0.85 | P   | 2117.97 | 0.01 | 0.00 | M,A | 21.17 | CYP1B1        | 2p21          |
| 227642_at    | 1.00 | 0.98 | P   | 703.43  | 0.01 | 0.00 | A   | 7.27  | TFCP2L1       | 2q14          |
| 231849_at    | 1.00 | 0.96 | P   | 396.67  | 0.01 | 0.00 | A   | 4.00  | LOC144501     | 12q13.13      |
| 236562_at    | 0.98 | 0.89 | P   | 109.63  | 0.01 | 0.00 | A   | 1.13  | ZNF439        | 19p13.2       |
| 202888_s_at  | 1.00 | 0.99 | P   | 524.07  | 0.01 | 0.00 | A   | 4.30  | ANPEP         | 15q25-q26     |
| 208161_s_at  | 1.00 | 0.98 | P   | 601.87  | 0.01 | 0.00 | A   | 6.07  | ABCC3         | 17q22         |
| 227758_at    | 1.00 | 0.95 | P   | 760.67  | 0.01 | 0.00 | A   | 7.40  | RERG          | 12p13.1       |
| 205266_at    | 1.00 | 0.96 | P   | 663.90  | 0.01 | 0.00 | A   | 7.03  | LIF           | 22q12.2       |
| 203060_s_at  | 1.00 | 0.99 | P   | 814.10  | 0.01 | 0.00 | A   | 8.80  | PAPSS2        | 10q23-q24     |
| 208607_s_at  | 0.99 | 0.92 | P   | 125.10  | 0.01 | 0.00 | A   | 1.43  | SAA2          | 11p15.1-p14   |
| 203238_s_at  | 0.98 | 0.91 | P   | 1342.23 | 0.01 | 0.00 | A   | 10.30 | NOTCH3        | 19p13.2-p13.1 |
| 201787_at    | 1.00 | 0.97 | P   | 727.37  | 0.01 | 0.00 | A   | 6.13  | FBLN1         | 22q13.31      |
| 202436_s_at  | 0.99 | 0.94 | P   | 4243.40 | 0.01 | 0.00 | M,A | 48.73 | CYP1B1        | 2p21          |
| 204942_s_at  | 0.98 | 0.91 | P   | 1856.80 | 0.01 | 0.00 | A   | 17.67 | ALDH3B2       | 11q13         |
| 218261_at    | 1.00 | 0.99 | P   | 1495.70 | 0.01 | 0.00 | A   | 16.13 | AP1M2         | 19p13.2       |
| 239148_at    | 1.00 | 0.99 | P   | 372.87  | 0.01 | 0.00 | A   | 3.30  |               |               |
| 221645_s_at  | 1.00 | 0.95 | P   | 424.87  | 0.01 | 0.00 | A   | 3.20  | ZNF83         | 19q13.3       |
| 239153_at    | 1.00 | 0.98 | P   | 398.23  | 0.01 | 0.00 | A   | 4.10  |               | 12q13.13      |
| 224579_at    | 1.00 | 0.96 | P   | 1396.00 | 0.01 | 0.00 | P   | 15.83 | SLC38A1       | 12q13.11      |
| 1557014_a_at | 1.00 | 0.97 | P   | 130.63  | 0.01 | 0.00 | A   | 1.47  | C9orf122      | 9p12          |
| 220638_s_at  | 1.00 | 0.97 | P,A | 192.60  | 0.01 | 0.00 | A   | 1.77  | CBLC          | 19q13.2       |
| 201825_s_at  | 0.99 | 0.93 | P   | 449.73  | 0.01 | 0.00 | A   | 5.07  | CGI-49        | 1q44          |
| 228067_at    | 1.00 | 0.99 | P   | 213.70  | 0.01 | 0.00 | A   | 2.17  | MGC42367      | 2q11.2        |
| 221760_at    | 1.00 | 0.96 | P   | 681.47  | 0.01 | 0.00 | A   | 5.20  | MAN1A1        | 6q22          |
| 227567_at    | 1.00 | 0.95 | P   | 320.30  | 0.01 | 0.00 | A   | 3.60  |               | 17            |
| 1559960_x_at | 0.97 | 0.87 | P,A | 149.47  | 0.01 | 0.00 | A   | 1.57  |               | 16q23.1       |
| 227875_at    | 1.00 | 0.96 | P   | 251.13  | 0.01 | 0.00 | A   | 2.73  | KLHL13        | xq23-q24      |
| 212143_s_at  | 0.95 | 0.85 | P   | 695.60  | 0.01 | 0.00 | A   | 7.47  | IGFBP3        | 7p13-p12      |
| 202575_at    | 0.99 | 0.92 | P   | 3350.03 | 0.01 | 0.00 | A   | 38.13 | CRABP2        | 1q21.3        |
| 37117_at     | 1.00 | 0.98 | P   | 1063.93 | 0.01 | 0.00 | A   | 11.03 | ARHGAP8       | 22q13.31      |
| 210571_s_at  | 0.90 | 0.79 | P   | 533.13  | 0.01 | 0.00 | A   | 5.60  | CMAH          | 6p21.32       |
| 229614_at    | 1.00 | 0.99 | P   | 277.87  | 0.01 | 0.00 | M,A | 2.17  | LOC162967     | 19q13.42      |
| 219995_s_at  | 1.00 | 0.99 | P   | 258.13  | 0.01 | 0.00 | A   | 2.73  | FLJ13841      | 17q25.3       |
| 201508_at    | 0.99 | 0.94 | P   | 414.77  | 0.01 | 0.00 | A   | 4.87  | IGFBP4        | 17q12-q21.1   |
| 216379_x_at  | 1.00 | 0.97 | P   | 5013.30 | 0.01 | 0.00 | P,M | 60.20 |               |               |
| 205487_s_at  | 0.99 | 0.92 | P   | 465.40  | 0.01 | 0.00 | A   | 4.20  | VGLL1         | xq26.3        |
| 222453_at    | 0.98 | 0.91 | P   | 127.43  | 0.01 | 0.00 | A   | 1.37  | CYBRD1        | 2q31.1        |
| 228706_s_at  | 0.98 | 0.91 | P   | 79.67   | 0.01 | 0.00 | A   | 0.93  | CLDN23        | 8p23.1        |
| 243818_at    | 1.00 | 0.97 | P   | 211.47  | 0.01 | 0.00 | A   | 2.53  |               |               |
| 204363_at    | 0.97 | 0.88 | P   | 1364.67 | 0.01 | 0.00 | A   | 14.40 | F3            | 1p22-p21      |

|              |      |      |       |         |      |      |     |       |               |                 |
|--------------|------|------|-------|---------|------|------|-----|-------|---------------|-----------------|
| 212151_at    | 1.00 | 0.97 | P,A   | 877.27  | 0.01 | 0.00 | A   | 10.33 | PBX1          | 1q23            |
| 208791_at    | 1.00 | 0.98 | P,A   | 198.77  | 0.01 | 0.00 | A   | 2.50  | CLU           | 8p21-p12        |
| 220192_x_at  | 1.00 | 0.95 | P     | 1669.60 | 0.01 | 0.00 | A   | 21.33 | SPDEF         | 6p21.3          |
| 227971_at    | 0.99 | 0.94 | P     | 580.37  | 0.01 | 0.00 | P,A | 6.83  | NRK           | xq22.3          |
| 1552797_s_at | 1.00 | 0.97 | P     | 1996.70 | 0.01 | 0.00 | P,A | 24.40 | PROM2         | 2q11.2          |
| 201428_at    | 0.99 | 0.94 | P     | 197.70  | 0.01 | 0.00 | A   | 2.57  | CLDN4         | 7q11.23         |
| 222242_s_at  | 0.99 | 0.95 | P     | 3604.37 | 0.01 | 0.00 | M,A | 47.27 | CLK5          | 19q13.3-q13.4   |
| 238441_at    | 0.99 | 0.94 | P     | 107.67  | 0.01 | 0.00 | A   | 1.23  |               |                 |
| 207419_s_at  | 0.94 | 0.83 | P,A   | 192.67  | 0.01 | 0.00 | A   | 2.63  | RAC2          | 22q13.1         |
| 220289_s_at  | 0.99 | 0.92 | P     | 120.73  | 0.01 | 0.00 | A   | 1.60  | AIM1L         | 1p35.3          |
| 238689_at    | 0.95 | 0.85 | P     | 469.67  | 0.01 | 0.01 | A   | 5.47  | GPR110        | 6p21.1          |
| 224999_at    | 0.99 | 0.95 | P     | 4971.30 | 0.01 | 0.00 | A   | 67.27 |               |                 |
| 204733_at    | 0.99 | 0.94 | P     | 2433.73 | 0.01 | 0.00 | A   | 31.97 | CLK6          | 19q13.3         |
| 1554195_a_at | 1.00 | 0.98 | P     | 394.60  | 0.01 | 0.00 | A   | 5.57  | MGC23985      | 5q32            |
| 231929_at    | 1.00 | 0.96 | P,A   | 89.97   | 0.01 | 0.01 | A   | 1.30  |               |                 |
| 206400_at    | 0.99 | 0.93 | P     | 296.70  | 0.01 | 0.00 | A   | 4.00  | LGALS7        | 19q13.2         |
| 204049_s_at  | 0.98 | 0.89 | P     | 686.23  | 0.01 | 0.00 | A   | 8.77  | PHACTR2       | 6q24.1          |
| 218186_at    | 1.00 | 0.97 | P     | 1579.67 | 0.01 | 0.00 | A   | 21.40 | RAB25         | 1q22            |
| 240304_s_at  | 1.00 | 0.96 | P     | 321.77  | 0.01 | 0.00 | A   | 4.37  |               | 16p13.11        |
| 228523_at    | 1.00 | 0.99 | P     | 1767.57 | 0.01 | 0.00 | P,A | 24.13 | NANOS1        | 10q26.13        |
| 214596_at    | 1.00 | 1.00 | P     | 1016.13 | 0.01 | 0.00 | A   | 14.23 | CLDN8         | 21q22.11        |
| 225792_at    | 1.00 | 0.97 | P     | 524.63  | 0.01 | 0.01 | A   | 7.70  |               |                 |
| 214920_at    | 1.00 | 0.99 | P     | 265.77  | 0.01 | 0.01 | A   | 3.20  | LOC221981     | 7p21.3          |
| 204818_at    | 0.99 | 0.95 | P     | 326.03  | 0.01 | 0.00 | A   | 4.53  | HSD17B2       | 16q24.1-q24.2   |
| 239350_at    | 0.98 | 0.90 | P,A   | 141.20  | 0.01 | 0.00 | A   | 2.13  | MRVLDC3       | 16q22.2         |
| 232164_s_at  | 1.00 | 0.97 | P     | 1051.33 | 0.01 | 0.00 | A   | 14.67 | EPK1          | 8q24.3          |
| 227803_at    | 1.00 | 0.98 | P     | 221.63  | 0.01 | 0.00 | A   | 2.53  | ENPP5         | 6p21.1-p11.2    |
| 211372_s_at  | 0.99 | 0.95 | P,A   | 263.13  | 0.01 | 0.00 | A   | 3.80  | IL1R2         | 2q12-q22        |
| 228974_at    | 1.00 | 0.98 | P     | 446.93  | 0.01 | 0.00 | M,A | 6.33  | MGC48625      | 19q13.42        |
| 212446_s_at  | 1.00 | 0.97 | P     | 530.03  | 0.01 | 0.01 | P,A | 7.73  | LASS6         | 2q31.1          |
| 243161_x_at  | 1.00 | 0.99 | P     | 1364.10 | 0.01 | 0.01 | A   | 21.80 | ZFP42         | 4q35.2          |
| 208146_s_at  | 0.99 | 0.92 | P     | 503.57  | 0.01 | 0.00 | A   | 7.53  | CPVL          | 7p15-p14        |
| 205518_s_at  | 0.98 | 0.90 | P     | 1138.63 | 0.01 | 0.00 | A   | 15.83 | CMAH          | 6p21.32         |
| 242463_x_at  | 1.00 | 0.96 | P     | 325.83  | 0.01 | 0.00 | A   | 4.50  | ZNF611        | 19q13.42        |
| 229623_at    | 1.00 | 0.99 | P     | 54.70   | 0.01 | 0.01 | A   | 0.90  |               | 4q21.3          |
| 212442_s_at  | 1.00 | 0.96 | P     | 1052.23 | 0.01 | 0.00 | A   | 15.70 | LASS6         | 2q31.1          |
| 222896_at    | 1.00 | 0.95 | P     | 339.93  | 0.01 | 0.01 | A   | 5.23  | MGC3169       | 19p13.12        |
| 225355_at    | 1.00 | 0.99 | P     | 763.70  | 0.01 | 0.00 | A   | 11.50 | DKFZP761M1511 | 5q35.2          |
| 203910_at    | 1.00 | 0.96 | P     | 2269.37 | 0.01 | 0.00 | P   | 33.87 | PARG1         | 1p22.1          |
| 226869_at    | 0.99 | 0.95 | P,M,A | 153.07  | 0.01 | 0.01 | A   | 2.60  |               |                 |
| 207002_s_at  | 1.00 | 0.97 | P     | 194.80  | 0.01 | 0.01 | A   | 3.20  | PLAGL1        | 6q24-q25        |
| 238778_at    | 1.00 | 0.99 | P     | 197.83  | 0.01 | 0.00 | A   | 2.77  | MPP7          | 10p12.1         |
| 207540_s_at  | 0.99 | 0.94 | P,M   | 219.57  | 0.02 | 0.00 | A   | 3.27  | SYK           | 9q22            |
| 207069_s_at  | 0.99 | 0.92 | P     | 301.67  | 0.02 | 0.00 | A   | 4.70  | SMAD6         | 15q21-q22       |
| 201288_at    | 1.00 | 0.96 | P     | 1862.63 | 0.02 | 0.00 | A   | 28.80 | ARHGDI8       | 12p12.3         |
| 220414_at    | 0.98 | 0.90 | P     | 640.70  | 0.02 | 0.00 | A   | 9.83  | CALML5        | 10p15.1         |
| 237061_at    | 0.98 | 0.91 | P     | 65.63   | 0.02 | 0.00 | A   | 0.97  | ZNF347        | 19q13.42        |
| 210059_s_at  | 1.00 | 0.97 | P     | 905.43  | 0.02 | 0.01 | A   | 14.50 | MAPK13        | 6p21.31         |
| 218995_s_at  | 1.00 | 0.96 | P     | 801.37  | 0.02 | 0.00 | A   | 12.17 | EDN1          | 6p24.1          |
| 214614_at    | 0.95 | 0.85 | P     | 191.67  | 0.02 | 0.00 | A   | 2.97  | HLXB9         | 7q36            |
| 222449_at    | 1.00 | 0.96 | P     | 522.20  | 0.02 | 0.01 | A   | 8.67  | TMEPAI        | 20q13.31-q13.33 |
| 205403_at    | 1.00 | 0.99 | P     | 553.90  | 0.02 | 0.01 | A   | 9.37  | IL1R2         | 2q12-q22        |
| 1556211_a_at | 0.99 | 0.94 | P     | 68.83   | 0.02 | 0.01 | A   | 1.13  |               |                 |
| 222895_s_at  | 1.00 | 0.98 | P     | 352.33  | 0.02 | 0.01 | A   | 5.63  | BCL11B        | 14q32.31        |
| 1556499_s_at | 1.00 | 0.97 | P     | 357.07  | 0.02 | 0.01 | A   | 6.37  | COL1A1        | 17q21.31-q22.1  |
| 203904_x_at  | 1.00 | 0.97 | P     | 1292.70 | 0.02 | 0.00 | A   | 20.37 | KAI1          | 11p11.2         |
| 208779_x_at  | 1.00 | 1.00 | P     | 3186.00 | 0.02 | 0.00 | P   | 53.60 | DDR1          | 6p21.3          |
| 211343_s_at  | 1.00 | 0.95 | P     | 472.20  | 0.02 | 0.00 | A   | 7.17  | COL13A1       | 10q22           |
| 223843_at    | 0.99 | 0.94 | P     | 88.43   | 0.02 | 0.00 | A   | 1.40  | SCARA3        | 8p21            |
| 219532_at    | 0.98 | 0.90 | P     | 118.10  | 0.02 | 0.00 | A   | 1.97  | ELOVL4        | 6q14            |
| 232202_at    | 1.00 | 0.95 | P     | 475.07  | 0.02 | 0.01 | A   | 7.83  |               |                 |
| 224724_at    | 1.00 | 0.95 | P     | 517.10  | 0.02 | 0.01 | A   | 10.03 | SULF2         | 20q12-q13.2     |
| 219109_at    | 1.00 | 0.98 | P     | 725.07  | 0.02 | 0.00 | A   | 10.83 | PF20          | 2q35            |
| 218162_at    | 1.00 | 0.96 | P     | 2272.13 | 0.02 | 0.00 | A   | 37.50 | OLFML3        | 1p13.1          |
| 213174_at    | 0.98 | 0.91 | P     | 205.33  | 0.02 | 0.00 | A   | 3.40  | TTC9          | 14q24.1         |
| 217901_at    | 0.98 | 0.90 | P     | 383.00  | 0.02 | 0.01 | A   | 7.60  | DSG2          | 18q12.1         |
| 209366_x_at  | 0.99 | 0.92 | P     | 1255.77 | 0.02 | 0.01 | A   | 22.67 | CYB5          | 18q23           |
| 214203_s_at  | 0.99 | 0.93 | P     | 893.97  | 0.02 | 0.00 | A   | 15.03 | PRODH         | 22q11.21        |
| 223374_s_at  | 1.00 | 0.96 | P     | 419.27  | 0.02 | 0.00 | A   | 6.90  | B3GALT3       | 3q25            |
| 207717_s_at  | 0.98 | 0.90 | P     | 427.17  | 0.02 | 0.01 | A   | 6.73  | PKP2          | 12p11           |
| 222168_at    | 1.00 | 0.97 | P     | 489.43  | 0.02 | 0.00 | A   | 7.47  |               |                 |
| 202917_s_at  | 1.00 | 0.96 | P     | 1230.07 | 0.02 | 0.00 | A   | 21.33 | S100A8        | 1q21            |
| 1556300_s_at | 1.00 | 0.97 | P     | 123.03  | 0.02 | 0.01 | A   | 2.20  |               |                 |
| 201425_at    | 1.00 | 0.98 | P     | 362.53  | 0.02 | 0.01 | A   | 6.33  | ALDH2         | 12q24.2         |
| 212236_x_at  | 1.00 | 0.99 | P     | 2776.80 | 0.02 | 0.00 | A   | 45.77 | KRT17         | 17q12-q21       |
| 216568_x_at  | 0.96 | 0.87 | P     | 177.70  | 0.02 | 0.00 | A   | 3.00  | KRT8          | 12q13           |
| 230552_at    | 0.98 | 0.89 | P     | 98.03   | 0.02 | 0.02 | A   | 2.07  | LOC284412     | 19q13.13        |
| 206295_at    | 1.00 | 0.96 | P     | 252.60  | 0.02 | 0.01 | A   | 3.97  | IL18          | 11q22.2-q22.3   |
| 221666_s_at  | 1.00 | 0.98 | P     | 521.23  | 0.02 | 0.02 | A   | 10.53 | ASC           | 16p12-p11.2     |
| 223315_at    | 0.99 | 0.93 | P     | 1018.57 | 0.02 | 0.00 | A   | 17.63 | NTN4          | 12q22-q23       |
| 244741_s_at  | 0.98 | 0.90 | P     | 413.90  | 0.02 | 0.01 | A   | 7.80  | MGC9913       | 19q13.43        |
| 208165_s_at  | 1.00 | 0.96 | P     | 333.63  | 0.02 | 0.00 | A   | 5.77  | PRSS16        | 6p21            |
| 242354_at    | 0.99 | 0.94 | P     | 672.83  | 0.02 | 0.00 | A   | 11.67 |               |                 |
| 228600_x_at  | 0.99 | 0.93 | P     | 290.20  | 0.02 | 0.00 | A   | 5.13  | MGC72075      | 7p15.3          |
| 203837_at    | 1.00 | 0.96 | P     | 692.40  | 0.02 | 0.00 | P,A | 11.87 | MAP3K5        | 6q22.33         |
| 231993_at    | 0.99 | 0.93 | P     | 87.13   | 0.02 | 0.01 | A   | 1.67  |               |                 |
| 209211_at    | 1.00 | 0.96 | P     | 522.33  | 0.02 | 0.00 | P,A | 9.33  | KLF5          | 13q21.33        |
| 208680_at    | 0.99 | 0.94 | P     | 2247.03 | 0.02 | 0.00 | A   | 38.57 | PRDX1         | 1p34.1          |
| 223423_at    | 0.98 | 0.90 | P     | 394.00  | 0.02 | 0.02 | A   | 8.43  | GPR160        | 3q26.2-q27      |
| 1553102_a_at | 0.96 | 0.86 | P     | 70.17   | 0.02 | 0.01 | A   | 1.33  | DKFZP434C171  | 5q33.1          |
| 203581_at    | 1.00 | 0.96 | P     | 381.43  | 0.02 | 0.01 | A   | 7.80  | RAB4A         | 1q42-q43        |
| 1554438_at   | 0.98 | 0.90 | P     | 66.23   | 0.02 | 0.00 | A   | 1.20  | KIAA1217      | 10p12.31        |
| 201850_at    | 1.00 | 0.98 | P     | 1062.00 | 0.02 | 0.00 | A   | 19.30 | CAPG          | 2cen-q24        |
| 237493_at    | 0.97 | 0.89 | P     | 96.67   | 0.02 | 0.00 | A   | 1.73  | IL22RA2       | 6q25.1          |
| 202016_at    | 1.00 | 0.96 | P     | 1646.77 | 0.02 | 0.00 | P,M | 28.80 | MEST          | 7q32            |
| 222847_s_at  | 0.99 | 0.94 | P     | 174.67  | 0.02 | 0.00 | A   | 3.13  | EGLN3         | 14q13.1         |

|              |      |      |       |         |      |      |     |       |           |              |
|--------------|------|------|-------|---------|------|------|-----|-------|-----------|--------------|
| 218677_at    | 1.00 | 0.99 | P     | 2084.53 | 0.02 | 0.00 | M,A | 36.33 | S100A14   | 1q21.1       |
| 223748_at    | 0.99 | 0.94 | P     | 400.97  | 0.02 | 0.02 | A   | 8.30  | SLC4A11   | 20p12        |
| 207076_s_at  | 1.00 | 0.99 | P     | 3030.03 | 0.02 | 0.00 | A   | 52.27 | ASS       | 9q34.1       |
| 226961_at    | 1.00 | 0.97 | P     | 253.93  | 0.02 | 0.00 | A   | 4.50  | LOC222171 | 7p15.1       |
| 1553696_s_at | 0.99 | 0.95 | P     | 135.67  | 0.02 | 0.00 | A   | 2.43  | ZNF569    | 19q13.13     |
| 225016_at    | 0.98 | 0.89 | P     | 226.73  | 0.02 | 0.01 | A   | 4.83  | APCDD1    | 18p11.21     |
| 1553972_a_at | 1.00 | 0.99 | P     | 1087.57 | 0.02 | 0.00 | A   | 20.50 | CBS       | 21q22.3      |
| 233555_s_at  | 0.94 | 0.83 | P     | 124.33  | 0.02 | 0.01 | A   | 2.57  | SULF2     | 20q12-q13.2  |
| 235779_at    | 1.00 | 0.98 | P     | 85.63   | 0.02 | 0.01 | A   | 1.67  |           |              |
| 1557285_at   | 0.97 | 0.87 | P     | 26.90   | 0.02 | 0.02 | A   | 0.53  | AREG      | 4q13-q21     |
| 210984_x_at  | 0.91 | 0.79 | P     | 554.73  | 0.02 | 0.02 | A   | 13.43 | EGFR      | 7p12         |
| 208510_s_at  | 0.99 | 0.93 | P     | 185.07  | 0.02 | 0.00 | A   | 3.50  | PPARG     | 3p25         |
| 226834_at    | 1.00 | 1.00 | P     | 136.10  | 0.02 | 0.01 | A   | 2.80  | ASAM      | 11q24.1      |
| 202948_at    | 1.00 | 0.99 | P,A   | 212.53  | 0.02 | 0.01 | A   | 3.70  | IL1R1     | 2q12         |
| 213085_s_at  | 1.00 | 0.96 | P     | 1247.30 | 0.02 | 0.01 | A   | 24.43 | KIBRA     | 5q35.1       |
| 213423_x_at  | 0.98 | 0.90 | P     | 925.17  | 0.02 | 0.01 | A   | 17.60 | TUSC3     | 8p22         |
| 206142_at    | 0.97 | 0.88 | P,M   | 120.20  | 0.02 | 0.00 | A   | 2.20  | ZNF135    | 19q13.4      |
| 222862_s_at  | 1.00 | 0.96 | P     | 225.93  | 0.02 | 0.00 | A   | 4.17  | AK5       | 1p31         |
| 236058_at    | 1.00 | 0.96 | P,M   | 66.93   | 0.02 | 0.00 | A   | 1.23  | FLJ34633  | 1p35.3       |
| 220066_at    | 1.00 | 0.97 | P     | 90.03   | 0.02 | 0.00 | A   | 1.63  | CARD15    | 16p12-q21    |
| 226610_at    | 1.00 | 0.98 | P     | 220.10  | 0.02 | 0.00 | A   | 4.03  | p30       | 17p11.2      |
| 220030_at    | 0.95 | 0.85 | P     | 48.27   | 0.02 | 0.00 | A   | 0.93  | STYK1     | 12p13.31     |
| 1552716_at   | 0.98 | 0.91 | P     | 86.90   | 0.02 | 0.00 | A   | 1.70  | FLJ23577  | 5p13.2       |
| 204503_at    | 1.00 | 0.96 | P     | 302.17  | 0.02 | 0.00 | A   | 5.57  | EVPL      | 17q25        |
| 239043_at    | 1.00 | 0.99 | P     | 178.70  | 0.02 | 0.01 | A   | 3.23  | ZNF404    | 19q13.32     |
| 218445_at    | 0.99 | 0.93 | P     | 359.80  | 0.02 | 0.00 | A   | 7.10  | H2AFY2    | 10q22        |
| 1562226_at   | 1.00 | 0.99 | P,M,A | 47.00   | 0.02 | 0.00 | A   | 0.90  | FLJ14712  | 7p21.3       |
| 224476_s_at  | 1.00 | 0.98 | P,M   | 128.90  | 0.02 | 0.01 | A   | 3.03  | MESP1     | 15q26.1      |
| 230986_at    | 0.98 | 0.91 | P     | 69.27   | 0.02 | 0.00 | A   | 1.33  |           |              |
| 226267_at    | 0.99 | 0.92 | P     | 507.87  | 0.02 | 0.01 | A   | 9.60  | JDP2      | 14q24.3      |
| 229116_at    | 0.99 | 0.92 | P     | 163.53  | 0.02 | 0.01 | A   | 3.53  | CNK2      | Xp22.13      |
| 235651_at    | 1.00 | 0.97 | P     | 234.10  | 0.02 | 0.00 | A   | 4.47  |           |              |
| 206827_s_at  | 1.00 | 0.98 | P     | 168.37  | 0.02 | 0.00 | A   | 3.17  | TRPV6     | 7q33-q34     |
| 238718_at    | 1.00 | 0.95 | P     | 353.10  | 0.02 | 0.01 | A   | 7.13  |           |              |
| 228303_at    | 0.98 | 0.91 | P     | 144.30  | 0.02 | 0.00 | A   | 2.77  |           |              |
| 209173_at    | 1.00 | 0.96 | P     | 193.47  | 0.02 | 0.00 | A   | 3.80  | AGR2      | 7p21.3       |
| 1553151_at   | 0.94 | 0.83 | P     | 118.10  | 0.02 | 0.00 | A   | 2.30  | ATPV6VD2  | 8q21.13      |
| 202687_s_at  | 0.99 | 0.94 | P     | 111.17  | 0.02 | 0.00 | A   | 2.27  | TNFSF10   | 3q26         |
| 212013_at    | 1.00 | 0.98 | P     | 285.30  | 0.02 | 0.01 | A   | 6.00  | D2S448    | 2p25         |
| 222108_at    | 1.00 | 0.97 | P     | 1134.13 | 0.02 | 0.00 | A   | 21.67 | AMIGO2    | 12q13.11     |
| 219587_at    | 1.00 | 0.97 | P     | 110.70  | 0.02 | 0.00 | A   | 2.13  | TTC12     | 11q23.2      |
| 1560201_at   | 1.00 | 0.97 | P     | 159.07  | 0.02 | 0.01 | A   | 3.30  | FLJ39963  | 7p11.2       |
| 228708_at    | 1.00 | 0.99 | P     | 1239.40 | 0.02 | 0.00 | A   | 25.60 | RAB27B    | 18q21.2      |
| 216074_x_at  | 0.99 | 0.93 | P,A   | 245.57  | 0.02 | 0.01 | A   | 5.27  | KIBRA     | 5q35.1       |
| 207011_s_at  | 0.99 | 0.92 | P     | 509.77  | 0.02 | 0.00 | A   | 10.37 | PTK7      | 6p21.1-p12.2 |
| 215726_s_at  | 1.00 | 0.99 | P     | 1108.37 | 0.02 | 0.00 | A   | 21.40 | CYB5      | 18q23        |
| 205728_at    | 1.00 | 0.97 | P     | 154.63  | 0.02 | 0.01 | A   | 3.47  | SH2D1A    | Xq25-q26     |
| 205768_s_at  | 1.00 | 0.98 | P     | 173.60  | 0.02 | 0.00 | A   | 3.50  | SLC27A2   | 15q21.2      |
| 212012_at    | 0.98 | 0.90 | P     | 1061.37 | 0.02 | 0.00 | A   | 21.43 | D2S448    | 2p25         |
| 235564_at    | 0.91 | 0.79 | P     | 30.47   | 0.02 | 0.01 | A   | 0.67  | H-plk     | 7q11.21      |
| 229105_at    | 0.99 | 0.94 | P     | 118.63  | 0.02 | 0.01 | A   | 2.53  | GPR39     | 2q21-q22     |
| 243198_at    | 0.99 | 0.94 | P     | 105.07  | 0.02 | 0.01 | A   | 2.37  | LOC161577 | 15q21.2      |
| 221816_s_at  | 1.00 | 0.99 | P     | 450.43  | 0.02 | 0.01 | A   | 9.63  | PHF11     | 13q14.12     |
| 1557094_at   | 0.99 | 0.94 | P     | 331.27  | 0.02 | 0.01 | A   | 6.53  | ANXA8     | 10q11.2      |
| 228737_at    | 0.99 | 0.94 | P,A   | 48.17   | 0.02 | 0.00 | A   | 0.97  | C20orf100 | 20q13.12     |
| 244740_at    | 1.00 | 0.96 | P     | 571.77  | 0.02 | 0.00 | A   | 11.77 | MGC9913   | 19q13.43     |
| 202177_at    | 1.00 | 0.96 | P     | 199.60  | 0.02 | 0.00 | A   | 4.13  | GAS6      | 13q34        |
| 222773_s_at  | 0.97 | 0.87 | P     | 183.40  | 0.02 | 0.01 | A   | 4.03  | GALNT12   | 9q31.1       |
| 204964_s_at  | 0.97 | 0.88 | P,A   | 209.17  | 0.02 | 0.01 | A   | 4.93  | SSPN      | 12p11.2      |
| 223435_s_at  | 1.00 | 0.95 | P     | 104.17  | 0.02 | 0.00 | A   | 2.13  | PCDH6     | 5q31         |
| 237923_at    | 1.00 | 0.97 | P     | 58.27   | 0.02 | 0.00 | A   | 1.20  |           |              |
| 227070_at    | 1.00 | 0.96 | P     | 190.40  | 0.02 | 0.01 | A   | 4.40  | LOC83468  | 12q          |
| 219429_at    | 0.96 | 0.87 | P     | 724.13  | 0.02 | 0.00 | P,A | 15.07 | FA2H      | 16q23        |
| 1556210_at   | 0.96 | 0.86 | P     | 32.33   | 0.02 | 0.01 | A   | 0.77  |           |              |
| 203434_s_at  | 0.99 | 0.93 | P,A   | 88.90   | 0.02 | 0.00 | A   | 1.87  | MME       | 3q25.1-q25.2 |
| 204990_s_at  | 0.99 | 0.92 | P     | 314.30  | 0.02 | 0.00 | A   | 6.57  | ITGB4     | 17q11-qter   |
| 204730_at    | 1.00 | 0.98 | P     | 330.00  | 0.02 | 0.00 | A   | 7.17  | RIMS3     | 1pter-p22.2  |
| 229390_at    | 1.00 | 0.96 | P,A   | 68.80   | 0.02 | 0.00 | A   | 1.43  |           |              |
| 205093_at    | 1.00 | 1.00 | P,A   | 179.93  | 0.02 | 0.00 | A   | 3.83  | PEPP3     | 1q32.1       |
| 201984_s_at  | 0.99 | 0.94 | P     | 3189.83 | 0.02 | 0.00 | A   | 67.40 | EGFR      | 7p12         |
| 212816_s_at  | 0.99 | 0.94 | P     | 597.37  | 0.02 | 0.01 | A   | 14.27 | CBS       | 21q22.3      |
| 205547_s_at  | 0.99 | 0.95 | P     | 367.70  | 0.02 | 0.00 | A   | 8.33  | TAGLN     | 11q23.2      |
| 205979_at    | 0.99 | 0.94 | P,M   | 50.30   | 0.02 | 0.00 | A   | 1.17  | SCGB2A1   | 11q13        |
| 1007_s_at    | 1.00 | 0.97 | P     | 2839.73 | 0.02 | 0.00 | A   | 60.83 | DDR1      | 6p21.3       |
| 236255_at    | 1.00 | 0.98 | P     | 100.60  | 0.02 | 0.00 | A   | 2.17  | KIAA1909  | 5p15.33      |
| 204679_at    | 1.00 | 0.99 | P     | 558.97  | 0.02 | 0.01 | A   | 13.57 | KCNK1     | 1q42-q43     |
| 213240_s_at  | 1.00 | 0.97 | P     | 450.43  | 0.02 | 0.00 | A   | 9.77  | KRT4      | 12q12-q13    |
| 203216_s_at  | 1.00 | 0.98 | P     | 976.40  | 0.02 | 0.00 | M,A | 21.20 | MYO6      | 6q13         |
| 229634_at    | 1.00 | 0.98 | P     | 198.10  | 0.02 | 0.00 | A   | 4.57  | FLJ90586  | 7q35         |
| 205239_at    | 0.99 | 0.93 | P     | 433.67  | 0.02 | 0.00 | P,A | 9.50  | AREG      | 4q13-q21     |
| 226302_at    | 1.00 | 0.97 | P     | 347.87  | 0.02 | 0.01 | A   | 8.00  | ATP8B1    | 18q21-q22    |
| 236448_at    | 1.00 | 0.98 | P     | 442.60  | 0.02 | 0.00 | A   | 9.87  | UNC5A     | 5q35.3       |
| 1560779_a_at | 1.00 | 0.99 | P     | 98.87   | 0.02 | 0.01 | A   | 2.33  | LOC126167 | 19q13.13     |
| 201340_s_at  | 0.99 | 0.92 | P     | 643.03  | 0.02 | 0.00 | A   | 14.60 | ENC1      | 5q12-q13.3   |
| 207802_at    | 1.00 | 0.96 | P,A   | 55.53   | 0.02 | 0.00 | A   | 1.27  | CRISP3    | 6p12.3       |
| 204915_s_at  | 0.99 | 0.93 | P     | 165.87  | 0.02 | 0.00 | A   | 3.90  | SOX11     | 2p25         |
| 211341_at    | 0.99 | 0.94 | P     | 85.10   | 0.02 | 0.00 | A   | 1.90  | POU4F1    | 13q21.1-q22  |
| 1554897_s_at | 0.99 | 0.94 | P,A   | 145.87  | 0.02 | 0.00 | A   | 3.27  | RHBDL2    | 1p34.2       |
| 235027_at    | 0.99 | 0.94 | P     | 103.73  | 0.02 | 0.00 | A   | 2.40  |           |              |
| 35148_at     | 1.00 | 0.97 | P     | 290.73  | 0.02 | 0.00 | A   | 6.57  | TJP3      | 19p13.3      |
| 235955_at    | 1.00 | 0.98 | P     | 47.90   | 0.02 | 0.02 | A   | 1.33  | MRVLDC2   | 5q13.1       |
| 215537_x_at  | 1.00 | 0.97 | P     | 633.17  | 0.02 | 0.00 | A   | 14.43 | DDAH2     | 6p21.3       |
| 244224_x_at  | 0.94 | 0.84 | P     | 252.80  | 0.02 | 0.02 | A   | 6.77  | LYNX1     | 8q24.3       |
| 218035_s_at  | 0.99 | 0.92 | P     | 843.53  | 0.02 | 0.01 | A   | 22.17 | FLJ20273  | 4p13-p12     |
| 224189_x_at  | 0.99 | 0.92 | P     | 195.30  | 0.02 | 0.01 | A   | 4.77  | EHF       | 11p12        |
| 204914_s_at  | 1.00 | 0.98 | P     | 224.03  | 0.02 | 0.01 | A   | 5.47  | SOX11     | 2p25         |

|              |      |      |       |         |      |      |     |       |              |                 |
|--------------|------|------|-------|---------|------|------|-----|-------|--------------|-----------------|
| 205767_at    | 0.99 | 0.93 | P     | 143.37  | 0.02 | 0.01 | A   | 3.60  | EREG         | 4q21.21         |
| 230746_s_at  | 1.00 | 0.97 | P     | 530.37  | 0.02 | 0.00 | M,A | 12.63 | STC1         | 8p21-p11.2      |
| 203186_s_at  | 0.99 | 0.94 | P     | 1901.40 | 0.02 | 0.00 | A   | 44.37 | S100A4       | 1q21            |
| 1558217_at   | 1.00 | 0.96 | P     | 418.00  | 0.02 | 0.01 | P,A | 10.97 | FLJ31952     | 17q21.1         |
| 204885_s_at  | 0.99 | 0.94 | P     | 61.03   | 0.02 | 0.01 | A   | 1.53  | MSLN         | 16p13.3         |
| 205328_at    | 1.00 | 0.96 | P     | 1924.50 | 0.02 | 0.00 | P   | 45.20 | CLDN10       | 13q31-q34       |
| 1554593_s_at | 0.98 | 0.90 | P     | 629.83  | 0.02 | 0.00 | A   | 14.67 | SLC1A6       | 19p13.13        |
| 205016_at    | 1.00 | 0.98 | P     | 619.97  | 0.02 | 0.01 | A   | 16.70 | TGFA         | 2p13            |
| 220169_at    | 1.00 | 0.96 | P     | 177.47  | 0.02 | 0.02 | A   | 5.27  | FLJ23235     | 4p14            |
| 212886_at    | 0.99 | 0.92 | P     | 45.00   | 0.02 | 0.00 | A   | 1.10  | DKFZP434C171 | 5q33.1          |
| 211368_s_at  | 1.00 | 0.98 | P     | 128.90  | 0.02 | 0.00 | A   | 3.00  | CASP1        | 11q23           |
| 229245_at    | 1.00 | 0.96 | P     | 215.83  | 0.02 | 0.01 | A   | 6.03  | PEPP3        | 1q32.1          |
| 227801_at    | 0.99 | 0.92 | P     | 378.53  | 0.02 | 0.00 | P,A | 9.30  | TSBF1        | 3q26.1          |
| 226863_at    | 1.00 | 0.97 | P     | 447.33  | 0.02 | 0.01 | A   | 12.07 |              |                 |
| 211689_s_at  | 0.94 | 0.83 | P,M,A | 165.43  | 0.02 | 0.01 | A   | 4.83  | TMPRSS2      | 21q22.3         |
| 242181_at    | 1.00 | 0.98 | P     | 617.90  | 0.02 | 0.02 | A   | 16.47 |              |                 |
| 244745_at    | 0.85 | 0.74 | P     | 183.33  | 0.02 | 0.03 | A   | 6.60  | RERG         | 12p13.1         |
| 227088_at    | 0.99 | 0.93 | P     | 131.60  | 0.02 | 0.01 | A   | 3.43  |              | 4q27            |
| 235550_at    | 1.00 | 0.95 | P     | 192.70  | 0.02 | 0.00 | A   | 4.70  |              |                 |
| 225011_at    | 1.00 | 0.98 | P     | 993.57  | 0.02 | 0.00 | M,A | 23.87 | PRKAR2A      | 3p21.3-p21.2    |
| 239954_at    | 1.00 | 0.98 | P     | 56.40   | 0.02 | 0.00 | A   | 1.37  | ZNF160       | 19q13.42        |
| 217875_s_at  | 1.00 | 0.98 | P,A   | 142.90  | 0.02 | 0.00 | A   | 3.50  | TMEPAI       | 20q13.31-q13.33 |
| 228423_at    | 1.00 | 0.98 | P     | 281.40  | 0.02 | 0.00 | A   | 7.10  |              |                 |
| 207843_x_at  | 1.00 | 0.96 | P     | 1270.80 | 0.02 | 0.00 | M,A | 31.40 | CYB5         | 18q23           |
| 225525_at    | 1.00 | 0.97 | P     | 776.20  | 0.02 | 0.02 | A   | 23.00 | KIAA1671     | 22q12           |
| 221885_at    | 1.00 | 0.96 | P,M   | 79.83   | 0.02 | 0.00 | A   | 1.93  | KIAA1277     | 7q34            |
| 211607_x_at  | 0.85 | 0.73 | P     | 411.50  | 0.02 | 0.00 | A   | 10.37 | EGFR         | 7p12            |
| 203423_at    | 0.99 | 0.93 | P     | 673.07  | 0.02 | 0.01 | A   | 18.47 | RBP1         | 3q23            |
| 229159_at    | 1.00 | 0.95 | P     | 108.73  | 0.02 | 0.02 | A   | 2.90  | KIAA0960     | 7p21.3          |
| 209459_s_at  | 0.96 | 0.87 | P     | 34.97   | 0.02 | 0.01 | A   | 0.97  | ABAT         | 16p13.2         |
| 218960_at    | 1.00 | 0.99 | P     | 120.13  | 0.02 | 0.00 | A   | 3.00  | TMPRSS4      | 11q23.3         |
| 207430_s_at  | 0.99 | 0.94 | P,M,A | 21.10   | 0.02 | 0.00 | A   | 0.53  | MSMB         | 10q11.2         |
| 219983_at    | 1.00 | 0.97 | P     | 359.63  | 0.02 | 0.01 | A   | 9.43  | HRASLS       | 3q29            |
| 213172_at    | 1.00 | 0.96 | P     | 172.67  | 0.03 | 0.02 | A   | 5.03  | TTC9         | 14q24.1         |
| 206658_at    | 1.00 | 0.99 | P     | 183.03  | 0.03 | 0.00 | A   | 4.57  | UPK3B        | 7q11.2          |
| 236656_s_at  | 1.00 | 0.96 | P     | 543.20  | 0.03 | 0.01 | A   | 14.73 |              |                 |
| 222829_s_at  | 0.99 | 0.94 | P,A   | 157.97  | 0.03 | 0.00 | A   | 3.93  | IL20RA       | 6q22.33-q23.1   |
| 204347_at    | 0.99 | 0.92 | P     | 415.90  | 0.03 | 0.01 | A   | 11.97 | AK3          | 1p31.3          |
| 207090_x_at  | 1.00 | 0.98 | P     | 201.97  | 0.03 | 0.02 | A   | 5.97  | ZFP30        | 19q13.13        |
| 238599_at    | 0.99 | 0.95 | P     | 91.37   | 0.03 | 0.02 | A   | 2.83  | IRAK1BP1     | 6q14-q15        |
| 228910_at    | 1.00 | 0.95 | P     | 656.93  | 0.03 | 0.00 | A   | 16.90 | KAI1         | 11p11.2         |
| 203954_x_at  | 1.00 | 0.97 | P     | 412.37  | 0.03 | 0.01 | A   | 12.07 | CLDN3        | 7q11.23         |
| 214751_at    | 0.99 | 0.95 | P     | 871.07  | 0.03 | 0.00 | P,M | 22.57 | LOC90333     | 19q13.42        |
| 202005_at    | 1.00 | 0.99 | P     | 771.57  | 0.03 | 0.01 | A   | 20.73 | ST14         | 11q24-q25       |
| 234970_at    | 0.96 | 0.87 | P     | 82.73   | 0.03 | 0.00 | A   | 2.10  | MTAC2D1      | 14q32.12        |
| 205593_s_at  | 0.94 | 0.83 | P     | 121.73  | 0.03 | 0.00 | A   | 3.20  | PDE9A        | 21q22.3         |
| 210749_x_at  | 1.00 | 0.98 | P     | 2530.63 | 0.03 | 0.00 | M,A | 64.30 | DDR1         | 6p21.3          |
| 204880_at    | 1.00 | 0.98 | P     | 149.40  | 0.03 | 0.00 | A   | 4.00  | MGMT         | 10q26           |
| 243386_at    | 1.00 | 0.97 | P     | 184.67  | 0.03 | 0.02 | A   | 5.47  |              |                 |
| 217621_at    | 0.99 | 0.93 | P     | 46.80   | 0.03 | 0.00 | A   | 1.27  |              |                 |
| 1556097_at   | 1.00 | 0.97 | P     | 36.37   | 0.03 | 0.00 | A   | 0.97  |              |                 |
| 227341_at    | 1.00 | 0.99 | P     | 91.70   | 0.03 | 0.00 | A   | 2.47  | C10orf30     | 10p14           |
| 204855_at    | 0.99 | 0.94 | P     | 271.50  | 0.03 | 0.00 | A   | 7.27  | SERPIN5      | 18q21.3         |
| 238451_at    | 0.90 | 0.79 | P     | 36.50   | 0.03 | 0.01 | A   | 1.10  | MPP7         | 10p12.1         |
| 213582_at    | 0.99 | 0.95 | P     | 123.23  | 0.03 | 0.02 | A   | 4.03  | ATP11A       | 13q34           |
| 227252_at    | 1.00 | 0.96 | P     | 342.57  | 0.03 | 0.00 | A   | 9.27  |              |                 |
| 1553589_a_at | 0.99 | 0.93 | P     | 97.40   | 0.03 | 0.01 | A   | 3.10  | MAP17        | 1p33            |
| 1555724_s_at | 0.99 | 0.94 | P,A   | 360.43  | 0.03 | 0.00 | A   | 9.80  | TAGLN        | 11q23.2         |
| 210663_s_at  | 0.98 | 0.90 | P     | 940.03  | 0.03 | 0.00 | A   | 25.83 | KYNU         | 2q22.3          |
| 230233_at    | 0.94 | 0.84 | P     | 66.53   | 0.03 | 0.00 | A   | 1.83  | RASGEF1B     | 4q21.3          |
| 236429_at    | 0.99 | 0.94 | P     | 124.67  | 0.03 | 0.01 | A   | 3.73  |              |                 |
| 227177_at    | 0.99 | 0.94 | P,A   | 190.53  | 0.03 | 0.00 | A   | 5.37  | CORO2A       | 9q22.3          |
| 224901_at    | 0.99 | 0.92 | P     | 661.03  | 0.03 | 0.00 | A   | 18.47 | SCD4         | 4q21.3          |
| 226553_at    | 1.00 | 0.99 | P,A   | 383.60  | 0.03 | 0.00 | A   | 10.60 | TMPRSS2      | 21q22.3         |
| 209493_at    | 1.00 | 0.95 | P     | 306.50  | 0.03 | 0.01 | A   | 9.80  | PDZK3        | 5p13.3          |
| 212976_at    | 1.00 | 0.95 | P     | 66.30   | 0.03 | 0.01 | A   | 1.97  | TA-LRRP      | 1p22.2          |
| 205490_x_at  | 1.00 | 0.98 | P,A   | 313.93  | 0.03 | 0.00 | A   | 9.30  | GJB3         | 1p34            |
| 213441_x_at  | 0.99 | 0.92 | P     | 1738.53 | 0.03 | 0.01 | A   | 53.73 | SPDEF        | 6p21.3          |
| 219768_at    | 1.00 | 0.98 | P     | 578.83  | 0.03 | 0.00 | A   | 16.93 | B7-H4        | 1p12            |
| 235795_at    | 0.99 | 0.94 | P     | 120.20  | 0.03 | 0.02 | A   | 4.13  | PAX6         | 11p13           |
| 203997_at    | 0.99 | 0.94 | P     | 505.57  | 0.03 | 0.02 | A   | 16.77 | PTPN3        | 9q31            |
| 212978_at    | 1.00 | 0.97 | P     | 503.83  | 0.03 | 0.01 | A   | 16.67 | TA-LRRP      | 1p22.2          |
| 202668_at    | 1.00 | 0.99 | P     | 882.67  | 0.03 | 0.00 | A   | 26.20 | EFNB2        | 13q33           |
| 204200_s_at  | 0.97 | 0.88 | P     | 182.10  | 0.03 | 0.01 | A   | 5.97  | PDGFB        | 22q13.1         |
| 209692_at    | 0.99 | 0.94 | P     | 154.63  | 0.03 | 0.00 | A   | 4.53  | EYA2         | 20q13.1         |
| 216641_s_at  | 0.93 | 0.82 | P,A   | 254.23  | 0.03 | 0.00 | A   | 7.30  | LAD1         | 1q25.1-q32.3    |
| 223681_s_at  | 1.00 | 0.97 | P     | 671.17  | 0.03 | 0.00 | P   | 19.40 | INADL        | 1p32.1          |
| 203421_at    | 0.99 | 0.93 | P,A   | 106.43  | 0.03 | 0.00 | A   | 3.07  | TP53I11      | 11p11.2         |
| 219395_at    | 1.00 | 0.97 | P     | 363.93  | 0.03 | 0.01 | A   | 11.10 | FLJ21918     | 16q22.1         |
| 210511_s_at  | 0.99 | 0.92 | P,M,A | 90.87   | 0.03 | 0.00 | A   | 2.77  | INHBA        | 7p15-p13        |
| 209270_at    | 0.99 | 0.94 | P     | 201.90  | 0.03 | 0.01 | A   | 6.33  | LAMB3        | 1q32            |
| 209228_x_at  | 0.99 | 0.92 | P     | 606.90  | 0.03 | 0.02 | A   | 22.03 | TUSC3        | 8p22            |
| 225664_at    | 1.00 | 0.97 | P     | 395.73  | 0.03 | 0.00 | A   | 11.57 | COL12A1      | 6q12-q13        |
| 203058_s_at  | 1.00 | 0.96 | P     | 306.43  | 0.03 | 0.01 | A   | 10.07 | PAPSS2       | 10q23-q24       |
| 228302_x_at  | 0.99 | 0.94 | P     | 111.40  | 0.03 | 0.00 | A   | 3.37  | CaMKIINalpha | 1p36.13         |
| 241420_at    | 0.98 | 0.91 | P     | 291.17  | 0.03 | 0.00 | A   | 8.87  |              |                 |
| 205829_at    | 0.95 | 0.85 | P     | 407.87  | 0.03 | 0.01 | A   | 13.70 | HSD17B1      | 17q11-q21       |
| 204160_s_at  | 0.97 | 0.89 | P     | 258.77  | 0.03 | 0.02 | A   | 9.13  | ENPP4        | 6p21.1          |
| 214667_s_at  | 0.98 | 0.90 | P     | 255.03  | 0.03 | 0.01 | A   | 8.00  | TP53I11      | 11p11.2         |
| 228411_at    | 1.00 | 0.98 | P     | 241.10  | 0.03 | 0.01 | A   | 7.57  | ALS2CR19     | 2q33.3          |
| 204913_s_at  | 1.00 | 0.97 | P     | 231.37  | 0.03 | 0.01 | A   | 7.47  | SOX11        | 2p25            |
| 1557389_at   | 0.97 | 0.89 | P,A   | 189.37  | 0.03 | 0.01 | A   | 6.13  |              |                 |
| 203896_s_at  | 0.97 | 0.87 | P     | 86.47   | 0.03 | 0.01 | A   | 2.83  | PLCB4        | 20p12           |
| 233044_at    | 0.99 | 0.93 | P,A   | 366.67  | 0.03 | 0.01 | A   | 12.93 |              |                 |
| 215189_at    | 0.99 | 0.94 | P     | 1582.03 | 0.03 | 0.00 | P,A | 48.53 | KRTHB6       | 12q13           |
| 229901_at    | 1.00 | 0.99 | P,M   | 179.03  | 0.03 | 0.00 | A   | 5.70  | ZNF488       | 10q11.22        |

|              |      |      |       |         |      |      |     |        |               |               |
|--------------|------|------|-------|---------|------|------|-----|--------|---------------|---------------|
| 205019_s_at  | 0.99 | 0.93 | P     | 772.67  | 0.03 | 0.01 | A   | 27.57  | VIPR1         | 3p22          |
| 219181_at    | 0.99 | 0.92 | P     | 706.40  | 0.03 | 0.00 | A   | 22.43  | LIPG          | 18q21.1       |
| 221087_s_at  | 1.00 | 1.00 | P     | 147.13  | 0.03 | 0.00 | A   | 4.70   | APOL3         | 22q13.1       |
| 205309_at    | 0.98 | 0.91 | P,A   | 49.80   | 0.03 | 0.00 | A   | 1.57   | SMPDL3B       | 1p35.2        |
| 207120_at    | 0.99 | 0.92 | P     | 69.63   | 0.03 | 0.01 | A   | 2.47   | FLJ14011      | 19q13.43      |
| 230464_at    | 1.00 | 0.97 | P     | 132.03  | 0.03 | 0.00 | A   | 4.17   | EDG8          | 19p13.2       |
| 201952_at    | 1.00 | 0.97 | P     | 1105.60 | 0.03 | 0.00 | P,A | 35.03  | ALCAM         | 3q13.1        |
| 209683_at    | 1.00 | 0.99 | P     | 48.77   | 0.03 | 0.00 | A   | 1.57   | DKFZP566A1524 | 2p24.3        |
| 240041_at    | 0.99 | 0.92 | P,A   | 67.00   | 0.03 | 0.02 | A   | 2.60   |               |               |
| 223500_at    | 0.99 | 0.95 | P,A   | 48.37   | 0.03 | 0.00 | A   | 1.57   | CPLX1         | 4p16.3        |
| 211002_s_at  | 0.98 | 0.91 | P     | 178.57  | 0.03 | 0.01 | A   | 6.37   | TRIM29        | 11q22-q23     |
| 209309_at    | 1.00 | 0.99 | P     | 3334.17 | 0.03 | 0.00 | P   | 106.83 | AZGP1         | 7q22.1        |
| 209126_x_at  | 0.98 | 0.90 | P     | 426.63  | 0.03 | 0.01 | A   | 15.20  | KRT6A         | 12q12-q13     |
| 204083_s_at  | 0.99 | 0.94 | P     | 1835.97 | 0.03 | 0.00 | P   | 60.33  | TPM2          | 9p13.2-p13.1  |
| 222802_at    | 1.00 | 0.97 | P     | 1171.97 | 0.03 | 0.00 | A   | 39.17  | EDN1          | 6p24.1        |
| 229341_at    | 0.92 | 0.80 | P,A   | 121.27  | 0.03 | 0.00 | A   | 4.03   | TFCP2L1       | 2q14          |
| 219529_at    | 0.99 | 0.94 | P,A   | 143.53  | 0.03 | 0.01 | A   | 5.23   | CLIC3         | 9q34.3        |
| 210150_s_at  | 0.98 | 0.90 | P     | 501.10  | 0.03 | 0.00 | A   | 17.07  | LAMA5         | 20q13.2-q13.3 |
| 227475_at    | 1.00 | 0.96 | P     | 1477.13 | 0.03 | 0.00 | P,A | 48.07  | FOXQ1         | 6p25          |
| 238481_at    | 0.95 | 0.85 | P     | 142.07  | 0.03 | 0.02 | A   | 5.63   | MGP           | 12p13.1-p12.3 |
| 227892_at    | 1.00 | 0.97 | P     | 137.97  | 0.03 | 0.00 | A   | 4.60   |               |               |
| 1562235_s_at | 1.00 | 0.96 | P     | 55.23   | 0.03 | 0.01 | A   | 2.10   |               |               |
| 219905_at    | 0.99 | 0.94 | P,A   | 90.00   | 0.03 | 0.00 | A   | 3.17   | ERMAP         | 1p34.1        |
| 206059_at    | 0.96 | 0.87 | P     | 580.50  | 0.03 | 0.00 | A   | 19.47  | ZNF91         | 19p13.1-p12   |
| 210086_at    | 0.98 | 0.90 | P     | 283.47  | 0.03 | 0.00 | A   | 9.67   | HR            | 8p21.2        |
| 230323_s_at  | 0.99 | 0.94 | P     | 256.43  | 0.03 | 0.01 | A   | 9.13   | LOC120224     | 11q24.3       |
| 209691_s_at  | 1.00 | 0.96 | P,A   | 83.20   | 0.03 | 0.01 | A   | 2.93   | DOK4          | 16q13         |
| 229964_at    | 1.00 | 0.98 | P     | 689.57  | 0.03 | 0.00 | P   | 23.17  | C9orf152      | 9q32          |
| 1553883_at   | 0.89 | 0.77 | P,A   | 11.50   | 0.03 | 0.02 | A   | 0.47   | C19orf9       | 19p13.11      |
| 203780_at    | 1.00 | 0.96 | P     | 201.73  | 0.03 | 0.00 | P,A | 6.83   | EVA1          | 11q24         |
| 203074_at    | 1.00 | 0.99 | P     | 3264.13 | 0.03 | 0.00 | A   | 111.70 | ANXA8         | 10q11.2       |
| 218006_s_at  | 0.98 | 0.90 | P     | 158.93  | 0.03 | 0.01 | A   | 6.20   | ZNF22         | 10q11         |
| 226959_at    | 1.00 | 0.95 | P     | 174.83  | 0.03 | 0.00 | A   | 5.97   |               |               |
| 205048_s_at  | 1.00 | 0.96 | P     | 4389.53 | 0.03 | 0.00 | P   | 148.17 | PSPH          | 7p15.2-p15.1  |
| 1554776_at   | 0.85 | 0.74 | P,A   | 91.73   | 0.03 | 0.00 | A   | 3.30   | ZFP42         | 4q35.2        |
| 206276_at    | 0.98 | 0.89 | P     | 167.10  | 0.03 | 0.00 | A   | 5.70   | LY6D          | 8q24-qter     |
| 232315_at    | 0.99 | 0.95 | P     | 45.83   | 0.03 | 0.00 | A   | 1.60   | LOC400713     | 19q13.41      |
| 203895_at    | 1.00 | 0.97 | P     | 268.47  | 0.03 | 0.00 | A   | 9.43   | PLCB4         | 20p12         |
| 240068_at    | 1.00 | 0.96 | P,A   | 37.53   | 0.03 | 0.01 | A   | 1.47   | LOC284835     | 21q22.3       |
| 236279_at    | 0.99 | 0.92 | P,M   | 108.60  | 0.03 | 0.00 | A   | 3.73   | FAM31C        | 19p13.3       |
| 227806_at    | 0.99 | 0.94 | P     | 170.63  | 0.03 | 0.00 | A   | 5.97   |               |               |
| 227478_at    | 0.99 | 0.92 | P     | 138.27  | 0.03 | 0.00 | A   | 4.87   | LOC284262     | 18q21.1       |
| 242070_at    | 0.99 | 0.91 | P     | 182.87  | 0.04 | 0.00 | A   | 6.57   |               | 19q13.13      |
| 227449_at    | 0.99 | 0.92 | P     | 285.53  | 0.04 | 0.00 | A   | 10.17  | EPHA4         | 2q36.1        |
| 53991_at     | 1.00 | 0.97 | P     | 239.33  | 0.04 | 0.00 | A   | 8.57   | KIAA1277      | 7q34          |
| 218718_at    | 1.00 | 0.99 | P     | 549.80  | 0.04 | 0.01 | A   | 20.57  | PDGFC         | 4q32          |
| 204179_at    | 1.00 | 0.96 | P     | 1256.37 | 0.04 | 0.00 | P,A | 45.77  | MB            | 22q13.1       |
| 209373_at    | 1.00 | 0.99 | P,M   | 465.13  | 0.04 | 0.01 | A   | 19.30  | BENE          | 2q13          |
| 202889_x_at  | 0.96 | 0.87 | P,A   | 216.67  | 0.04 | 0.00 | A   | 7.70   | MAP7          | 6q23.2        |
| 218321_x_at  | 0.99 | 0.93 | P     | 482.33  | 0.04 | 0.00 | A   | 17.03  | MK-STYX       | 7q11.23       |
| 209558_s_at  | 0.91 | 0.79 | P,M,A | 231.83  | 0.04 | 0.01 | A   | 8.80   | HIP1R         | 12q24         |
| 204678_s_at  | 0.99 | 0.94 | P     | 120.13  | 0.04 | 0.00 | A   | 4.30   | KCNK1         | 1q42-q43      |
| 218451_at    | 0.97 | 0.89 | P,A   | 298.80  | 0.04 | 0.00 | A   | 10.50  | CDCP1         | 3p21.32       |
| 232078_at    | 0.92 | 0.82 | P,A   | 265.47  | 0.04 | 0.00 | A   | 9.47   | PVRL2         | 19q13.2-q13.4 |
| 212473_s_at  | 1.00 | 0.95 | P     | 732.63  | 0.04 | 0.00 | M,A | 25.97  | MICAL2        | 11p15.3       |
| 214823_at    | 0.99 | 0.94 | P     | 208.60  | 0.04 | 0.00 | A   | 7.70   | ZNF204        | 6p21.3        |
| 222463_s_at  | 1.00 | 0.97 | P     | 284.67  | 0.04 | 0.01 | A   | 11.57  | BACE1         | 11q23.2-q23.3 |
| 213929_at    | 1.00 | 0.97 | P     | 454.60  | 0.04 | 0.00 | P   | 17.13  |               |               |
| 202504_at    | 1.00 | 0.95 | P     | 1118.77 | 0.04 | 0.00 | A   | 41.57  | TRIM29        | 11q22-q23     |
| 209083_at    | 1.00 | 0.98 | P     | 143.53  | 0.04 | 0.01 | A   | 5.70   | CORO1A        | 16p12.1       |
| 1554246_at   | 1.00 | 0.99 | P     | 223.70  | 0.04 | 0.01 | A   | 9.17   | MGC52423      | 1p34.1        |
| 226988_s_at  | 0.99 | 0.93 | P     | 299.00  | 0.04 | 0.02 | A   | 14.00  | MYH14         | 19q13.33      |
| 206122_at    | 1.00 | 0.99 | P,A   | 130.67  | 0.04 | 0.00 | A   | 4.80   | SOX15         | 17p13         |
| 205155_s_at  | 1.00 | 0.96 | P     | 133.10  | 0.04 | 0.00 | A   | 4.83   | SPTBN2        | 11q13         |
| 222173_s_at  | 1.00 | 0.96 | P     | 139.03  | 0.04 | 0.01 | A   | 5.57   | TBC1D2        | 9q31.1        |
| 225536_at    | 1.00 | 0.99 | P     | 797.03  | 0.04 | 0.00 | A   | 29.07  | BCLP          | 1p35-p34      |
| 1554592_a_at | 0.94 | 0.83 | P     | 335.10  | 0.04 | 0.00 | A   | 12.60  | SLC1A6        | 19p13.13      |
| 218922_s_at  | 0.94 | 0.82 | P,M,A | 51.73   | 0.04 | 0.00 | A   | 1.93   | LASS4         | 19p13.3       |
| 225987_at    | 1.00 | 0.99 | P     | 1496.57 | 0.04 | 0.00 | A   | 55.73  | FLJ23153      | 7q21.13       |
| 235048_at    | 1.00 | 0.96 | P,M   | 124.37  | 0.04 | 0.00 | A   | 4.67   | KIAA0888      | 5q13.3        |
| 227140_at    | 1.00 | 0.98 | P     | 215.53  | 0.04 | 0.00 | M,A | 8.20   |               |               |
| 244261_at    | 0.99 | 0.94 | P,M,A | 75.63   | 0.04 | 0.00 | A   | 2.83   | IL28RA        | 1p36.11       |
| 203453_at    | 1.00 | 0.96 | P     | 835.67  | 0.04 | 0.00 | A   | 31.27  | SCNN1A        | 12p13         |
| 218086_at    | 0.99 | 0.93 | P     | 320.53  | 0.04 | 0.00 | A   | 12.30  | NPDC1         | 9q34.3        |
| 213664_at    | 0.99 | 0.93 | P     | 384.13  | 0.04 | 0.01 | P,A | 15.37  | SLC1A1        | 9p24          |
| 206832_s_at  | 0.98 | 0.91 | P,A   | 87.33   | 0.04 | 0.00 | A   | 3.30   | SEMA3F        | 3p21.3        |
| 222222_s_at  | 1.00 | 0.99 | P,M,A | 338.10  | 0.04 | 0.01 | A   | 13.90  | HOMER3        | 19p13.11      |
| 203438_at    | 0.99 | 0.92 | P     | 178.63  | 0.04 | 0.00 | A   | 6.80   | STC2          | 5q35.2        |
| 235599_at    | 1.00 | 0.96 | P,A   | 45.03   | 0.04 | 0.00 | A   | 1.73   | LOC339535     | 1q43          |
| 230578_at    | 0.98 | 0.90 | P,A   | 42.53   | 0.04 | 0.00 | A   | 1.63   | ZNF471        | 19q13.43      |
| 228948_at    | 0.97 | 0.87 | P,A   | 121.57  | 0.04 | 0.00 | A   | 4.97   | EPHA4         | 2q36.1        |
| 206043_s_at  | 0.99 | 0.95 | P,A   | 218.70  | 0.04 | 0.00 | A   | 8.77   | KIAA0703      | 16q24.1       |
| 218180_s_at  | 1.00 | 0.97 | P     | 234.50  | 0.04 | 0.01 | A   | 10.07  | EPS8L2        | 11p15.5       |
| 209269_s_at  | 0.95 | 0.85 | P     | 67.13   | 0.04 | 0.00 | A   | 2.77   | SYK           | 9q22          |
| 225962_at    | 0.97 | 0.89 | P,M   | 57.47   | 0.04 | 0.01 | A   | 2.63   | ZNRF1         | 16q22.3       |
| 212875_s_at  | 1.00 | 0.99 | P     | 873.47  | 0.04 | 0.00 | A   | 34.67  | C21orf25      | 21q22.3       |
| 206048_at    | 1.00 | 0.98 | P     | 69.00   | 0.04 | 0.00 | A   | 2.77   | ZNF339        | 20pter-q11.23 |
| 1554314_at   | 0.98 | 0.90 | P     | 98.77   | 0.04 | 0.00 | A   | 4.00   | C6orf141      | 6p12.3        |
| 203582_s_at  | 0.97 | 0.88 | P     | 263.73  | 0.04 | 0.00 | A   | 10.57  | RAB4A         | 1q42-q43      |
| 220979_s_at  | 0.99 | 0.92 | P     | 573.87  | 0.04 | 0.00 | P,A | 22.90  | SIAT7E        | 1p31.1        |
| 208116_s_at  | 0.89 | 0.78 | P     | 144.37  | 0.04 | 0.01 | A   | 6.30   | MAN1A1        | 6q22          |
| 219874_at    | 0.99 | 0.94 | P     | 87.77   | 0.04 | 0.01 | A   | 3.80   | SLC12A8       | 3q21.2        |
| 207109_at    | 0.99 | 0.93 | P     | 47.77   | 0.04 | 0.01 | A   | 2.13   | POU2F3        | 11q23.3       |
| 202994_s_at  | 0.96 | 0.85 | P,A   | 115.23  | 0.04 | 0.01 | A   | 5.07   | FBLN1         | 22q13.31      |
| 212531_at    | 0.99 | 0.95 | P     | 637.97  | 0.04 | 0.00 | A   | 25.60  | LCN2          | 9q34          |
| 238513_at    | 0.98 | 0.91 | P     | 939.97  | 0.04 | 0.00 | P   | 37.53  | TMG4          | 11p13         |

|              |      |      |       |         |      |      |     |       |           |               |
|--------------|------|------|-------|---------|------|------|-----|-------|-----------|---------------|
| 222240_s_at  | 1.00 | 0.98 | P     | 662.73  | 0.04 | 0.00 | A   | 27.33 | ISYNA1    | 19p13.11      |
| 214046_at    | 1.00 | 0.99 | P     | 362.77  | 0.04 | 0.00 | A   | 15.17 |           |               |
| 226706_at    | 0.97 | 0.87 | P     | 237.67  | 0.04 | 0.02 | PA  | 10.93 | FLJ23867  | 1q25.1        |
| 233025_at    | 0.98 | 0.89 | P,A   | 56.40   | 0.04 | 0.01 | A   | 2.50  | PDZK3     | 5p13.3        |
| 236725_at    | 1.00 | 0.98 | P     | 295.20  | 0.04 | 0.01 | A   | 13.57 | KIBRA     | 5q35.1        |
| 236657_at    | 0.98 | 0.90 | P     | 207.67  | 0.04 | 0.02 | A   | 9.97  |           |               |
| 220318_at    | 0.99 | 0.93 | P,A   | 124.83  | 0.04 | 0.00 | A   | 5.13  | EPN3      | 17q21.33      |
| 226586_at    | 0.96 | 0.86 | P     | 331.67  | 0.04 | 0.00 | A   | 13.93 | SAMD6     | 9q31.1        |
| 209343_at    | 1.00 | 0.98 | P     | 1680.70 | 0.04 | 0.00 | A   | 70.47 | EFHD1     | 2q37.1        |
| 219634_at    | 0.98 | 0.91 | P     | 230.30  | 0.04 | 0.01 | A   | 10.37 | CHST11    | 12q           |
| 223895_s_at  | 1.00 | 0.98 | P     | 252.63  | 0.04 | 0.01 | A   | 11.73 | EPN3      | 17q21.33      |
| 202800_at    | 1.00 | 0.99 | P     | 619.30  | 0.04 | 0.00 | A   | 25.80 | SLC1A3    | 5p13          |
| 206382_s_at  | 0.99 | 0.95 | P,A   | 90.10   | 0.04 | 0.02 | A   | 4.57  | BDNF      | 11p13         |
| 211812_s_at  | 0.96 | 0.87 | P     | 114.50  | 0.04 | 0.01 | A   | 5.27  | B3GALT3   | 3q25          |
| 210480_s_at  | 0.97 | 0.87 | P     | 142.73  | 0.04 | 0.00 | A   | 6.17  | MYO6      | 6q13          |
| 233982_x_at  | 0.98 | 0.91 | P     | 397.43  | 0.04 | 0.01 | A   | 18.43 | MK-STYX   | 7q11.23       |
| 225373_at    | 0.99 | 0.94 | P     | 201.37  | 0.04 | 0.01 | A   | 9.23  | PP2135    | 10q22.3       |
| 209679_s_at  | 1.00 | 0.96 | P     | 497.20  | 0.04 | 0.02 | A   | 24.17 | LOC57228  | 12q13.13      |
| 213947_s_at  | 1.00 | 0.98 | P,A   | 207.07  | 0.04 | 0.00 | A   | 8.87  | NUP210    | 3p25.2-p25.1  |
| 223779_at    | 1.00 | 0.95 | P     | 876.10  | 0.04 | 0.00 | P   | 37.90 | MGC10981  | 4p16.1        |
| 213680_at    | 1.00 | 0.95 | P     | 1259.47 | 0.04 | 0.00 | A   | 54.70 | KRT6B     | 12q12-q13     |
| 242054_s_at  | 0.99 | 0.91 | P     | 30.53   | 0.04 | 0.00 | A   | 1.37  | SIX3      | 2p16-p21      |
| 213400_s_at  | 0.98 | 0.89 | P,A   | 127.80  | 0.04 | 0.01 | A   | 5.83  | TBL1X     | xp22.3        |
| 232370_at    | 0.96 | 0.87 | P,A   | 70.43   | 0.04 | 0.00 | A   | 3.10  | LOC254057 | 3q21.3        |
| 232120_at    | 0.99 | 0.95 | P     | 311.23  | 0.04 | 0.00 | A   | 13.43 |           |               |
| 237086_at    | 0.99 | 0.92 | P     | 187.87  | 0.04 | 0.00 | A   | 8.37  | FOXA1     | 14q12-q13     |
| 236337_at    | 0.99 | 0.92 | P     | 137.17  | 0.04 | 0.01 | A   | 6.33  | LOC221711 | 6p24.1        |
| 1559258_a_at | 1.00 | 0.99 | P     | 559.00  | 0.04 | 0.00 | P   | 24.20 |           | Xq24          |
| 222762_x_at  | 0.99 | 0.92 | P     | 474.93  | 0.04 | 0.00 | PA  | 20.97 | LIMD1     | 3p21.3        |
| 242915_at    | 1.00 | 0.96 | P     | 158.83  | 0.04 | 0.00 | A   | 6.93  | LOC91120  | 19p13.11      |
| 206631_at    | 0.85 | 0.72 | P,A   | 32.30   | 0.04 | 0.01 | A   | 1.57  | PTGER2    | 14q22         |
| 225841_at    | 1.00 | 0.98 | P     | 632.60  | 0.04 | 0.00 | PA  | 28.17 | FLJ30525  | 1p13.3        |
| 204856_at    | 1.00 | 0.97 | P     | 325.17  | 0.04 | 0.01 | A   | 14.93 | B3GNT3    | 19p13.1       |
| 201510_at    | 0.98 | 0.90 | P     | 254.13  | 0.04 | 0.01 | A   | 12.43 | ELF3      | 1q32.2        |
| 205258_at    | 0.95 | 0.84 | P     | 625.33  | 0.04 | 0.00 | A   | 28.10 | INHBB     | 2cen-q13      |
| 208933_s_at  | 0.94 | 0.83 | P     | 129.60  | 0.04 | 0.01 | A   | 6.17  | LGALS8    | 1q42-q43      |
| 209603_at    | 1.00 | 0.97 | P,M,A | 110.40  | 0.04 | 0.00 | A   | 4.87  | GATA3     | 10p15         |
| 208622_s_at  | 0.95 | 0.85 | P     | 767.53  | 0.04 | 0.01 | A   | 38.83 | VIL2      | 6q25.2-q26    |
| 236302_at    | 1.00 | 0.97 | P     | 251.07  | 0.04 | 0.01 | A   | 11.83 | PPM1E     | 17q23.2       |
| 227388_at    | 1.00 | 0.98 | P     | 602.60  | 0.04 | 0.00 | PA  | 27.30 | LOC389708 | 9p21.1        |
| 204048_s_at  | 0.98 | 0.90 | P     | 587.53  | 0.05 | 0.00 | A   | 26.67 | PHACTR2   | 6q24.1        |
| 203021_at    | 1.00 | 0.97 | P     | 1405.10 | 0.05 | 0.00 | PA  | 64.47 | SLPI      | 20q12         |
| 200637_s_at  | 0.95 | 0.84 | P     | 516.63  | 0.05 | 0.00 | A   | 23.27 | PTPRF     | 1p34          |
| 235924_at    | 1.00 | 0.95 | P     | 243.17  | 0.05 | 0.01 | A   | 12.20 |           |               |
| 208373_s_at  | 1.00 | 0.97 | P     | 348.57  | 0.05 | 0.01 | A   | 16.27 | P2RY6     | 11q13.5       |
| 200636_s_at  | 1.00 | 0.99 | P     | 2002.50 | 0.05 | 0.00 | A   | 92.40 | PTPRF     | 1p34          |
| 224209_s_at  | 0.99 | 0.93 | P     | 875.17  | 0.05 | 0.00 | PA  | 39.50 | GDA       | 9q21.11-21.33 |
| 209604_s_at  | 1.00 | 0.99 | P     | 1442.73 | 0.05 | 0.00 | A   | 65.87 | GATA3     | 10p15         |
| 238673_at    | 0.99 | 0.92 | P     | 285.57  | 0.05 | 0.00 | PA  | 13.20 |           |               |
| 202295_s_at  | 1.00 | 0.98 | P     | 906.30  | 0.05 | 0.00 | PA  | 41.90 | CTSH      | 15q24-q25     |
| 203528_at    | 1.00 | 0.97 | P     | 148.90  | 0.05 | 0.01 | A   | 7.37  | SEMA4D    | 9q22-q31      |
| 226494_at    | 0.95 | 0.85 | P,A   | 78.33   | 0.05 | 0.00 | A   | 3.70  | KIAA1543  | 19p13.3-p13.2 |
| 1554006_a_at | 1.00 | 0.97 | P     | 308.43  | 0.05 | 0.01 | A   | 15.93 | LLGL2     | 17q24-q25     |
| 219360_s_at  | 0.95 | 0.85 | P     | 64.40   | 0.05 | 0.01 | A   | 3.27  | TRPM4     | 19q13.33      |
| 206140_at    | 0.99 | 0.95 | P     | 56.73   | 0.05 | 0.00 | A   | 2.63  | LHX2      | 9q33-q34.1    |
| 1558280_s_at | 1.00 | 0.98 | P     | 239.67  | 0.05 | 0.00 | A   | 11.47 | PARG1     | 1p22.1        |
| 232417_x_at  | 1.00 | 0.96 | P     | 93.27   | 0.05 | 0.01 | A   | 4.60  | ZDHHC11   | 5p15.33       |
| 200635_s_at  | 1.00 | 0.95 | P     | 1001.37 | 0.05 | 0.00 | A   | 48.83 | PTPRF     | 1p34          |
| 213618_at    | 1.00 | 0.97 | P     | 313.33  | 0.05 | 0.01 | A   | 15.83 | CENTD1    | 4p15.1        |
| 218921_at    | 0.96 | 0.86 | P     | 150.20  | 0.05 | 0.02 | A   | 8.60  | SIGIRR    | 11p15.5       |
| 209318_x_at  | 1.00 | 0.97 | P     | 206.10  | 0.05 | 0.01 | A   | 10.77 | PLAGL1    | 6q24-q25      |
| 209909_s_at  | 1.00 | 1.00 | P     | 562.07  | 0.05 | 0.00 | P   | 26.93 | TGFB2     | 1q41          |
| 39248_at     | 1.00 | 0.99 | P     | 330.33  | 0.05 | 0.00 | PA  | 16.17 | AQP3      | 9p13          |
| 217014_s_at  | 1.00 | 0.97 | P     | 1315.77 | 0.05 | 0.00 | P   | 62.80 | GJE1      | 7q22.1        |
| 239370_at    | 0.99 | 0.94 | P     | 292.17  | 0.05 | 0.00 | A   | 13.97 |           |               |
| 210880_s_at  | 0.99 | 0.92 | P,A   | 115.23  | 0.05 | 0.00 | A   | 5.63  | EFS       | 14q11.2-q12   |
| 231807_at    | 1.00 | 0.95 | P     | 153.87  | 0.05 | 0.00 | A   | 7.43  | KIAA1217  | 10p12.31      |
| 202688_at    | 1.00 | 0.97 | P     | 245.67  | 0.05 | 0.00 | A   | 11.87 | TNFSF10   | 3q26          |
| 231283_at    | 0.99 | 0.93 | P     | 57.30   | 0.05 | 0.01 | A   | 3.07  | MGAT4A    | 2q12          |
| 204718_at    | 1.00 | 0.99 | P     | 699.33  | 0.05 | 0.00 | PA  | 33.93 | EPHB6     | 7q33-q35      |
| 230405_at    | 1.00 | 0.97 | P,A   | 89.20   | 0.05 | 0.01 | A   | 4.73  |           | 5q31.1        |
| 225688_s_at  | 1.00 | 0.98 | P     | 427.67  | 0.05 | 0.00 | P   | 20.87 | PHLDB2    | 3q13.13       |
| 234722_x_at  | 0.99 | 0.94 | P     | 160.13  | 0.05 | 0.01 | A   | 8.90  | OBP2B     | 9q34          |
| 204751_x_at  | 0.98 | 0.90 | P     | 243.90  | 0.05 | 0.01 | A   | 13.20 | DSC2      | 18q12.1       |
| 238805_at    | 0.99 | 0.94 | P     | 149.13  | 0.05 | 0.02 | A   | 8.13  | MGC14839  | 11q23.2       |
| 218810_at    | 0.99 | 0.95 | P     | 359.60  | 0.05 | 0.01 | A   | 18.40 | FLJ23231  | 1p34.2        |
| 203713_s_at  | 1.00 | 0.97 | P     | 382.27  | 0.05 | 0.00 | A   | 18.87 | LLGL2     | 17q24-q25     |
| 204971_at    | 1.00 | 1.00 | P     | 439.97  | 0.05 | 0.00 | PA  | 21.83 | CSTA      | 3q21          |
| 201842_s_at  | 1.00 | 0.99 | P     | 345.37  | 0.05 | 0.00 | A   | 17.13 | EFEMP1    | 2p16          |
| 211719_x_at  | 0.99 | 0.92 | P,A   | 102.73  | 0.05 | 0.00 | A   | 5.20  | FN1       | 2q34          |
| 1555862_s_at | 0.96 | 0.87 | P     | 118.73  | 0.05 | 0.02 | A   | 6.70  | FLJ23471  | 7p22.3        |
| 227598_at    | 1.00 | 0.97 | P     | 96.83   | 0.05 | 0.00 | A   | 4.87  | C7orf29   | 7q36.1        |
| 218237_s_at  | 0.99 | 0.94 | P     | 872.90  | 0.05 | 0.00 | A   | 43.73 | SLC38A1   | 12q13.11      |
| 226129_at    | 1.00 | 0.99 | P     | 927.40  | 0.05 | 0.00 | A   | 46.30 | FLJ46072  | 8q24.3        |
| 208890_s_at  | 1.00 | 0.98 | P     | 1613.50 | 0.05 | 0.00 | A   | 80.37 | PLXNB2    | 22q13.33      |
| 1552727_s_at | 0.99 | 0.95 | P     | 291.67  | 0.05 | 0.00 | PA  | 14.63 |           |               |
| 226907_at    | 0.99 | 0.95 | P,A   | 233.03  | 0.05 | 0.02 | A   | 13.90 | PPP1R14C  | 6q24.3-q25.3  |
| 204201_s_at  | 1.00 | 0.99 | P     | 150.60  | 0.05 | 0.00 | M,A | 7.67  | PTPN13    | 4q21.3        |
| 1566229_a_at | 0.90 | 0.79 | P,A   | 36.30   | 0.05 | 0.03 | A   | 2.53  |           |               |
| 209791_at    | 1.00 | 0.97 | P     | 867.67  | 0.05 | 0.01 | A   | 47.10 | PADI2     | 1p35.2-p35.1  |
| 226548_at    | 0.99 | 0.93 | P,A   | 64.37   | 0.05 | 0.01 | A   | 3.60  | LOC112868 | 16p12.1       |
| 205014_at    | 1.00 | 0.95 | P     | 896.97  | 0.05 | 0.01 | A   | 49.33 | HBP17     | 4p16-p15      |
| 201117_s_at  | 0.99 | 0.95 | P     | 48.23   | 0.05 | 0.01 | A   | 2.67  | CPE       | 4q32.3        |
| 218644_at    | 1.00 | 0.95 | P     | 333.77  | 0.05 | 0.02 | A   | 19.50 | PLEK2     | 14q24.1       |
| 219522_at    | 0.99 | 0.93 | P     | 818.50  | 0.05 | 0.00 | A   | 41.67 | FJX1      | 11p13         |
| 223624_at    | 0.98 | 0.90 | P,A   | 45.60   | 0.05 | 0.00 | A   | 2.43  | ANUBL1    | 10q11.22      |

|              |      |      |       |         |      |      |     |        |               |               |
|--------------|------|------|-------|---------|------|------|-----|--------|---------------|---------------|
| 229975_at    | 0.99 | 0.94 | P     | 99.53   | 0.05 | 0.01 | A   | 5.53   |               |               |
| 213122_at    | 1.00 | 0.98 | P     | 397.70  | 0.05 | 0.01 | A   | 22.00  | TSPYL5        | 8q22.1        |
| 228716_at    | 0.99 | 0.95 | P     | 145.90  | 0.05 | 0.01 | A   | 8.30   | THRB          | 3p24.3        |
| 222561_at    | 1.00 | 0.99 | P     | 2576.67 | 0.05 | 0.00 | P   | 133.30 | LANCL2        | 7q31.1-q31.33 |
| 206799_at    | 0.98 | 0.89 | P     | 91.93   | 0.05 | 0.00 | A   | 4.73   | SCGB1D2       | 11q13         |
| 226701_at    | 1.00 | 0.98 | P     | 232.33  | 0.05 | 0.01 | P,A | 12.97  | GJA5          | 1q21.1        |
| 208190_s_at  | 0.99 | 0.92 | P     | 1192.20 | 0.05 | 0.00 | P   | 61.93  | LISCH7        | 19q13.13      |
| 242098_at    | 0.93 | 0.81 | P     | 20.23   | 0.05 | 0.02 | A   | 1.27   | LOC202451     | 6q23.3        |
| 236646_at    | 0.99 | 0.94 | P     | 162.27  | 0.05 | 0.00 | A   | 8.53   | FLJ31166      | 12p13.31      |
| 221011_s_at  | 0.98 | 0.91 | P     | 280.13  | 0.05 | 0.02 | A   | 18.13  | LBH           | 2p23.3        |
| 205613_at    | 1.00 | 0.97 | P     | 150.30  | 0.05 | 0.00 | A   | 8.20   | LOC51760      | 16p13.11      |
| 206277_at    | 0.95 | 0.84 | P,A   | 68.97   | 0.05 | 0.00 | A   | 3.70   | P2RY2         | 11q13.5-q14.1 |
| 225618_at    | 1.00 | 1.00 | P     | 99.90   | 0.05 | 0.01 | A   | 5.63   | LOC201176     | 17q21.31      |
| 220027_s_at  | 1.00 | 0.96 | P     | 343.20  | 0.05 | 0.01 | A   | 19.73  | RASIP1        | 19q13.33      |
| 1555812_a_at | 0.96 | 0.87 | P     | 965.53  | 0.05 | 0.00 | M,A | 51.23  | ARHGDB1       | 12p12.3       |
| 210004_at    | 0.96 | 0.86 | P     | 226.80  | 0.05 | 0.00 | P   | 12.70  | OLR1          | 12p13.2-p12.3 |
| 222892_s_at  | 0.99 | 0.95 | P     | 132.17  | 0.05 | 0.00 | A   | 7.27   | FLJ11036      | 3p25.2        |
| 223000_s_at  | 1.00 | 0.97 | P     | 2249.20 | 0.05 | 0.00 | P   | 119.97 | F11R          | 1q21.2-q21.3  |
| 1569157_s_at | 1.00 | 0.96 | P     | 403.53  | 0.05 | 0.01 | P,A | 22.47  | LOC162993     | 19p13.2       |
| 204381_at    | 0.97 | 0.88 | P     | 115.00  | 0.05 | 0.02 | A   | 7.20   | LRF3          | 19q13.12      |
| 211434_s_at  | 1.00 | 0.97 | P     | 124.30  | 0.05 | 0.01 | A   | 7.17   | CCRL2         | 3p21          |
| 205265_s_at  | 0.99 | 0.93 | P     | 205.97  | 0.05 | 0.02 | A   | 12.43  | APEG1         | 2q36.1        |
| 209873_s_at  | 1.00 | 0.98 | P     | 601.60  | 0.05 | 0.01 | A   | 33.87  | PKP3          | 11p15         |
| 230276_at    | 1.00 | 0.96 | P,A   | 32.53   | 0.05 | 0.01 | A   | 1.90   | DKFZP566A1524 | 2p24.3        |
| 210367_s_at  | 0.99 | 0.94 | P     | 674.73  | 0.05 | 0.00 | P,A | 36.33  | PTGES         | 9q34.3        |
| 222496_s_at  | 0.96 | 0.87 | P     | 327.53  | 0.05 | 0.01 | A   | 18.77  | FLJ20273      | 4p13-p12      |
| 227769_at    | 1.00 | 0.97 | P     | 516.37  | 0.05 | 0.00 | P,A | 27.80  | GPR27         | 3p21-p14      |
| 1556185_a_at | 0.99 | 0.94 | P     | 169.20  | 0.05 | 0.01 | P,A | 10.07  |               |               |
| 203469_s_at  | 0.99 | 0.95 | P     | 172.50  | 0.05 | 0.02 | A   | 10.50  | CDK10         | 16q24         |
| 219867_at    | 1.00 | 0.96 | P     | 304.37  | 0.06 | 0.01 | A   | 18.70  | CHODL         | 21q11.2       |
| 234653_at    | 0.91 | 0.79 | P     | 279.73  | 0.06 | 0.00 | A   | 15.10  |               |               |
| 204693_at    | 1.00 | 0.97 | P     | 303.23  | 0.06 | 0.01 | A   | 18.47  | CDC42EP1      | 22q13.1       |
| 204268_at    | 0.99 | 0.95 | P     | 873.57  | 0.06 | 0.00 | A   | 47.63  | S100A2        | 1q21          |
| 220646_s_at  | 0.99 | 0.93 | P     | 145.90  | 0.06 | 0.00 | A   | 8.13   | KLRF1         | 12p12.3-13.2  |
| 217681_at    | 1.00 | 0.96 | P     | 81.43   | 0.06 | 0.01 | A   | 4.97   | WNT7B         | 22q13         |
| 213285_at    | 0.99 | 0.92 | P     | 356.23  | 0.06 | 0.00 | A   | 19.90  | LOC161291     | 14q23.1       |
| 231311_at    | 1.00 | 0.96 | P     | 256.73  | 0.06 | 0.01 | A   | 14.97  |               |               |
| 201939_at    | 1.00 | 0.98 | P     | 2445.73 | 0.06 | 0.00 | P   | 136.10 | PLK2          | 5q12.1-q13.2  |
| 228051_at    | 1.00 | 0.96 | P     | 446.33  | 0.06 | 0.01 | A   | 28.33  | LOC202451     | 6q23.3        |
| 230630_at    | 1.00 | 0.98 | P     | 631.20  | 0.06 | 0.00 | A   | 35.77  | AK3           | 9pter-p13     |
| 229530_at    | 0.99 | 0.94 | P     | 185.90  | 0.06 | 0.00 | P,A | 10.77  |               |               |
| 226299_at    | 1.00 | 0.99 | P     | 131.33  | 0.06 | 0.00 | A   | 7.40   | PKN3          | 9q34.13       |
| 202995_s_at  | 0.96 | 0.86 | P     | 289.27  | 0.06 | 0.02 | P,A | 19.00  | FBLN1         | 22q13.31      |
| 225301_s_at  | 1.00 | 0.96 | P     | 659.30  | 0.06 | 0.00 | A   | 37.20  | MYO5B         | 18q21         |
| 228346_at    | 0.99 | 0.94 | P     | 191.73  | 0.06 | 0.00 | A   | 10.83  |               |               |
| 203256_at    | 0.98 | 0.91 | P,A   | 217.17  | 0.06 | 0.00 | A   | 12.50  | CDH3          | 16q22.1       |
| 226611_s_at  | 1.00 | 0.97 | P     | 400.83  | 0.06 | 0.00 | A   | 22.87  | p30           | 17p11.2       |
| 206595_at    | 1.00 | 0.97 | P     | 360.90  | 0.06 | 0.00 | A   | 20.67  | CST6          | 11q13         |
| 203939_at    | 1.00 | 0.96 | P     | 513.87  | 0.06 | 0.01 | A   | 30.60  | NT5E          | 6q14-q21      |
| 228846_at    | 0.99 | 0.94 | P     | 389.13  | 0.06 | 0.00 | A   | 22.23  | MAD           | 2p13-p12      |
| 227963_at    | 1.00 | 0.97 | P     | 48.67   | 0.06 | 0.01 | A   | 3.03   |               |               |
| 212654_at    | 1.00 | 0.99 | P     | 49.63   | 0.06 | 0.00 | A   | 2.97   | TPM2          | 9p13.2-p13.1  |
| 204667_at    | 1.00 | 0.96 | P     | 360.93  | 0.06 | 0.00 | A   | 20.90  | FOXA1         | 14q12-q13     |
| 227752_at    | 0.99 | 0.94 | P,A   | 44.77   | 0.06 | 0.00 | A   | 2.57   |               |               |
| 206953_s_at  | 0.99 | 0.92 | P     | 206.97  | 0.06 | 0.01 | A   | 12.97  | LPHN2         | 1p31.1        |
| 231775_at    | 1.00 | 0.97 | P     | 255.33  | 0.06 | 0.02 | A   | 16.43  | TNFRSF10A     | 8p21          |
| 212472_at    | 1.00 | 0.96 | P     | 419.33  | 0.06 | 0.00 | A   | 25.13  | MICAL2        | 11p15.3       |
| 225342_at    | 1.00 | 0.98 | P     | 1840.57 | 0.06 | 0.00 | P   | 105.87 | AK3           | 9pter-p13     |
| 239623_at    | 1.00 | 0.99 | P,A   | 40.43   | 0.06 | 0.00 | A   | 2.37   |               |               |
| 211864_s_at  | 0.94 | 0.84 | P     | 1479.10 | 0.06 | 0.00 | P   | 86.20  | FER1L3        | 10q24         |
| 241844_x_at  | 0.97 | 0.88 | P     | 50.83   | 0.06 | 0.02 | A   | 3.27   | FLJ23235      | 4p14          |
| 240382_at    | 1.00 | 0.97 | P     | 84.87   | 0.06 | 0.01 | A   | 5.23   |               |               |
| 204019_s_at  | 0.98 | 0.90 | P     | 1271.07 | 0.06 | 0.00 | P   | 75.57  | SH3YL1        | 2p25.3        |
| 205466_s_at  | 0.93 | 0.82 | P,A   | 27.60   | 0.06 | 0.00 | A   | 1.63   | HS3ST1        | 4p16          |
| 220187_at    | 0.95 | 0.84 | P     | 69.20   | 0.06 | 0.02 | A   | 4.80   | FLJ23153      | 7q21.13       |
| 1555340_x_at | 0.98 | 0.90 | P     | 5523.40 | 0.06 | 0.00 | P   | 327.30 | RAP1A         | 1p13.3        |
| 204385_at    | 0.97 | 0.87 | P     | 902.77  | 0.06 | 0.00 | A   | 54.70  | KYNU          | 2q22.3        |
| 227565_at    | 0.99 | 0.94 | P     | 430.93  | 0.06 | 0.00 | P   | 25.80  |               |               |
| 210058_at    | 1.00 | 0.99 | P     | 1168.40 | 0.06 | 0.00 | P   | 70.23  | MAPK13        | 6p21.31       |
| 201341_at    | 1.00 | 0.97 | P     | 955.40  | 0.06 | 0.00 | A   | 57.63  | ENC1          | 5q12-q13.3    |
| 208119_s_at  | 1.00 | 0.97 | P     | 334.90  | 0.06 | 0.00 | A   | 20.33  | ZNF505        | 19p13.11      |
| 226926_at    | 1.00 | 0.96 | P     | 469.90  | 0.06 | 0.00 | P   | 28.60  | ZD52F10       | 19q13.13      |
| 209894_at    | 1.00 | 0.98 | P     | 224.83  | 0.06 | 0.01 | P   | 14.30  | LEPR          | 1p31          |
| 218309_at    | 1.00 | 0.98 | P     | 1013.90 | 0.06 | 0.00 | P   | 61.70  | CaMKIIalpha   | 1p36.13       |
| 206723_s_at  | 1.00 | 0.95 | P     | 393.13  | 0.06 | 0.01 | A   | 25.50  | EDG4          | 19p12         |
| 242006_at    | 0.98 | 0.91 | P,A   | 38.93   | 0.06 | 0.00 | A   | 2.40   | C6orf152      | 6q14.3        |
| 232117_at    | 0.90 | 0.79 | P,A   | 18.27   | 0.06 | 0.02 | A   | 1.37   | ZNF471        | 19q13.43      |
| 204963_at    | 1.00 | 0.97 | P,M,A | 117.93  | 0.06 | 0.00 | A   | 7.40   | SSPN          | 12p11.2       |
| 220907_at    | 1.00 | 0.95 | P     | 28.40   | 0.06 | 0.01 | A   | 1.83   | FLJ22684      | 6p21.1        |
| 232080_at    | 1.00 | 0.96 | P     | 370.20  | 0.06 | 0.00 | P,A | 22.60  | NEDL2         | 2q33.1        |
| 218219_s_at  | 1.00 | 0.97 | P     | 5070.60 | 0.06 | 0.00 | P   | 311.10 | LANCL2        | 7q31.1-q31.33 |
| 232038_at    | 1.00 | 0.98 | P     | 61.67   | 0.06 | 0.01 | A   | 3.93   | C6orf170      | 6q22.32       |
| 227753_at    | 1.00 | 0.96 | P     | 591.53  | 0.06 | 0.00 | A   | 37.33  | FLJ90586      | 7q35          |
| 208009_s_at  | 0.99 | 0.94 | P     | 305.50  | 0.06 | 0.01 | A   | 20.07  | ARHGGEF16     | 1p36.3        |
| 210694_s_at  | 0.98 | 0.89 | P     | 107.87  | 0.06 | 0.00 | A   | 6.80   | MID1          | Xp22          |
| 209454_s_at  | 1.00 | 0.95 | P     | 359.70  | 0.06 | 0.00 | P   | 22.97  | TEAD3         | 6p21.2        |
| 227370_at    | 1.00 | 0.97 | P     | 555.03  | 0.06 | 0.00 | P   | 34.90  | KIAA1946      | 2q32.2        |
| 231577_s_at  | 1.00 | 0.98 | P     | 635.47  | 0.06 | 0.00 | P   | 40.60  | GBP1          | 1p22.2        |
| 33323_r_at   | 0.99 | 0.95 | P     | 3412.73 | 0.06 | 0.00 | P   | 213.93 | SFN           | 1p35.3        |
| 227345_at    | 1.00 | 0.96 | P     | 105.57  | 0.06 | 0.02 | A   | 7.37   | TNFRSF10D     | 8p21          |
| 225000_at    | 1.00 | 0.97 | P     | 917.00  | 0.06 | 0.00 | A   | 60.27  | PRKAR2A       | 3p21.3-p21.2  |
| 205253_at    | 1.00 | 0.97 | P,M   | 57.70   | 0.06 | 0.00 | A   | 3.67   | PBX1          | 1q23          |
| 204348_s_at  | 1.00 | 0.97 | P     | 1619.37 | 0.06 | 0.00 | P,M | 102.27 | AK3           | 1p31.3        |
| 220149_at    | 1.00 | 0.99 | P     | 653.33  | 0.06 | 0.00 | P   | 41.63  | FLJ22671      | 2q37.3        |
| 204287_at    | 0.97 | 0.87 | P     | 197.00  | 0.06 | 0.01 | A   | 13.00  | SYNGR1        | 22q13.1       |
| 1555339_at   | 0.99 | 0.93 | P     | 4658.70 | 0.06 | 0.00 | P   | 300.83 | RAP1A         | 1p13.3        |



|              |      |      |       |         |      |      |       |        |              |                |
|--------------|------|------|-------|---------|------|------|-------|--------|--------------|----------------|
| 219580_s_at  | 1.00 | 0.96 | P     | 160.13  | 0.06 | 0.01 | P,A   | 10.63  | TMC5         | 16p13.11       |
| 207291_at    | 1.00 | 0.99 | P     | 565.90  | 0.07 | 0.00 | A     | 36.43  | TMG4         | 11p13          |
| 201613_s_at  | 1.00 | 0.95 | P     | 165.93  | 0.07 | 0.01 | A     | 11.83  | RUVBL1       | 3q21           |
| 204072_s_at  | 1.00 | 0.95 | P     | 123.83  | 0.07 | 0.00 | A     | 8.20   | 13CDNA73     | 13q12.3        |
| 214433_s_at  | 1.00 | 0.98 | P     | 138.63  | 0.07 | 0.00 | A     | 9.07   | SELENBP1     | 1q21-q22       |
| 226382_at    | 1.00 | 0.99 | P     | 295.67  | 0.07 | 0.00 | A     | 19.67  | LOC283070    | 10p14          |
| 235988_at    | 0.99 | 0.93 | P     | 184.53  | 0.07 | 0.01 | A     | 12.70  | GPR110       | 6p21.1         |
| 212062_at    | 1.00 | 0.97 | P     | 310.13  | 0.07 | 0.01 | A     | 21.73  | ATP9A        | 20q13.11-q13.2 |
| 211653_x_at  | 1.00 | 0.95 | P     | 265.83  | 0.07 | 0.01 | A     | 19.03  | AKR1C1       | 10p15-p14      |
| 242919_at    | 0.99 | 0.93 | P     | 209.27  | 0.07 | 0.01 | M,A   | 14.60  | LOC114977    | 19p13.11       |
| 201474_s_at  | 1.00 | 0.96 | P     | 303.07  | 0.07 | 0.01 | A     | 21.90  | ITGA3        | 17q21.33       |
| 243585_at    | 1.00 | 0.99 | P,A   | 112.90  | 0.07 | 0.01 | A     | 7.83   |              |                |
| 222890_at    | 1.00 | 0.96 | P     | 101.83  | 0.07 | 0.01 | P,A   | 7.07   | HSPC065      | 16q13          |
| 229842_at    | 0.99 | 0.94 | P     | 165.27  | 0.07 | 0.02 | A     | 12.17  | ELF3         | 1q32.2         |
| 227997_at    | 1.00 | 0.97 | P     | 511.47  | 0.07 | 0.00 | P,A   | 33.93  |              |                |
| 223687_s_at  | 1.00 | 0.96 | P     | 200.50  | 0.07 | 0.01 | A     | 13.80  | LY6K         | 8q24.3         |
| 202350_s_at  | 1.00 | 0.97 | P     | 138.03  | 0.07 | 0.00 | P,M   | 9.27   | MATN2        | 8q22           |
| 232116_at    | 0.99 | 0.92 | P,A   | 145.87  | 0.07 | 0.00 | A     | 9.77   | SOM          | 1p36.11        |
| 205990_s_at  | 1.00 | 0.96 | P     | 267.47  | 0.07 | 0.00 | A     | 18.37  | WNT5A        | 3p21-p14       |
| 210697_at    | 0.99 | 0.92 | P,M,A | 53.93   | 0.07 | 0.01 | A     | 3.90   | ZNF257       | 19q13          |
| 1554777_at   | 0.92 | 0.81 | P     | 133.77  | 0.07 | 0.00 | A     | 9.13   | ZFP42        | 4q35.2         |
| 226248_s_at  | 1.00 | 0.97 | P     | 206.47  | 0.07 | 0.00 | A     | 13.93  | KIAA1324     | 1p13.3-p13.2   |
| 205470_s_at  | 0.99 | 0.94 | P,A   | 59.83   | 0.07 | 0.01 | A     | 4.47   | KLK11        | 19q13.3-q13.4  |
| 218094_s_at  | 1.00 | 0.99 | P     | 755.53  | 0.07 | 0.01 | P,A   | 52.53  | C20orf35     | 20q13.12       |
| 227629_at    | 1.00 | 0.97 | P     | 221.77  | 0.07 | 0.01 | P     | 16.47  | PRLR         | 5p14-p13       |
| 209730_at    | 1.00 | 0.96 | P     | 79.20   | 0.07 | 0.01 | A     | 5.57   | SEMA3F       | 3p21.3         |
| 214909_s_at  | 1.00 | 0.99 | P     | 519.97  | 0.07 | 0.00 | P,M   | 35.43  | DDAH2        | 6p21.3         |
| 219388_at    | 0.98 | 0.90 | P     | 943.30  | 0.07 | 0.01 | P,M,A | 67.80  | TFCP2L3      | 8q22.3         |
| 204198_s_at  | 1.00 | 0.96 | P     | 105.03  | 0.07 | 0.01 | A     | 7.67   | RUNX3        | 1p36           |
| 219630_at    | 0.98 | 0.91 | P,A   | 128.17  | 0.07 | 0.01 | A     | 9.43   | MAP17        | 1p33           |
| 60474_at     | 0.99 | 0.94 | P     | 212.13  | 0.07 | 0.01 | A     | 15.13  | C20orf42     | 20p12.3        |
| 230440_at    | 0.99 | 0.93 | P     | 322.83  | 0.07 | 0.00 | A     | 22.47  | ZNF469       | 16q24          |
| 226185_at    | 1.00 | 0.97 | P     | 529.33  | 0.07 | 0.00 | P     | 37.90  | CDS1         | 4q21.23        |
| 204304_s_at  | 1.00 | 0.98 | P     | 564.13  | 0.07 | 0.00 | P     | 39.00  | PROM1        | 4p15.33        |
| 221709_s_at  | 0.99 | 0.94 | P,A   | 67.23   | 0.07 | 0.00 | A     | 4.67   | C14orf131    | 14q32.33       |
| 52940_at     | 1.00 | 0.98 | P     | 440.23  | 0.07 | 0.00 | A     | 30.63  | SIGIRR       | 11p15.5        |
| 222549_at    | 0.99 | 0.94 | P     | 617.90  | 0.07 | 0.00 | A     | 43.07  | CLDN1        | 3q28-q29       |
| 226803_at    | 0.99 | 0.91 | P     | 312.77  | 0.07 | 0.00 | A     | 22.30  | Shax3        | 8q21.13        |
| 223739_at    | 1.00 | 0.96 | P     | 78.80   | 0.07 | 0.01 | A     | 5.77   | PADI1        | 1p36.13        |
| 215125_s_at  | 0.99 | 0.93 | P     | 252.77  | 0.07 | 0.01 | A     | 18.53  | UGT1A10      | 2q37           |
| 227347_x_at  | 1.00 | 0.98 | P     | 1136.83 | 0.07 | 0.00 | P,A   | 79.43  | Hes4         | 1p36.33        |
| 204343_at    | 0.99 | 0.94 | P     | 77.10   | 0.07 | 0.02 | A     | 5.87   | ABCA3        | 16p13.3        |
| 214329_x_at  | 1.00 | 0.96 | P     | 203.43  | 0.07 | 0.00 | A     | 14.50  | TNFSF10      | 3q26           |
| 227721_at    | 0.98 | 0.91 | P     | 206.60  | 0.07 | 0.01 | A     | 15.53  | VIP          | 19p13.12       |
| 238017_at    | 0.99 | 0.94 | P     | 114.80  | 0.07 | 0.00 | A     | 8.10   | RDH-E2       | 8q12.1         |
| 239657_x_at  | 0.99 | 0.93 | P     | 375.40  | 0.07 | 0.00 | A     | 26.67  | FOXO6        | 1p34.1         |
| 232960_at    | 0.97 | 0.89 | P,A   | 8.87    | 0.07 | 0.01 | A     | 0.87   | FLJ20130     | Xq22.3         |
| 208006_at    | 0.99 | 0.94 | P     | 493.77  | 0.07 | 0.00 | A     | 35.93  | FOX11        | 5q34           |
| 212611_at    | 0.99 | 0.95 | P     | 1507.10 | 0.07 | 0.00 | P,A   | 108.30 | DTX4         | 11q12.2        |
| 52975_at     | 1.00 | 0.95 | P,A   | 159.57  | 0.07 | 0.00 | A     | 11.67  | C9orf28      | 9q34.12        |
| 239903_at    | 0.99 | 0.93 | P     | 82.43   | 0.07 | 0.02 | A     | 6.50   |              |                |
| 227053_at    | 1.00 | 0.98 | P     | 146.80  | 0.07 | 0.00 | A     | 10.63  | PACSN1       | 6p21.3         |
| 230482_at    | 1.00 | 0.99 | P     | 209.57  | 0.07 | 0.00 | A     | 15.30  | SIAT7E       | 1p31.1         |
| 228124_at    | 0.99 | 0.93 | P     | 154.20  | 0.07 | 0.01 | P,A   | 11.57  | C20orf22     | 20p11.21       |
| 203725_at    | 0.99 | 0.92 | P     | 692.80  | 0.07 | 0.01 | P,A   | 51.70  | GADD45A      | 1p31.2-p31.1   |
| 226817_at    | 1.00 | 0.99 | P     | 775.47  | 0.07 | 0.00 | P,M   | 56.67  | DSC2         | 18q12.1        |
| 226226_at    | 1.00 | 0.97 | A     | 347.83  | 0.07 | 0.01 | A     | 27.03  | LOC120224    | 11q24.3        |
| 205775_at    | 1.00 | 0.99 | P     | 517.10  | 0.07 | 0.00 | A     | 37.93  | D6S2654E     | 6p25-pter      |
| 214858_at    | 1.00 | 0.95 | P     | 63.73   | 0.07 | 0.02 | A     | 5.13   |              |                |
| 209696_at    | 1.00 | 0.97 | P     | 363.97  | 0.07 | 0.00 | A     | 26.87  | FBP1         | 9q22.3         |
| 215842_s_at  | 0.97 | 0.87 | P,A   | 70.17   | 0.07 | 0.02 | A     | 5.70   | ATP11A       | 13q34          |
| 201631_s_at  | 1.00 | 0.96 | P     | 5885.63 | 0.07 | 0.00 | P     | 433.00 | IER3         | 6p21.3         |
| 222774_s_at  | 1.00 | 0.99 | P     | 1000.47 | 0.07 | 0.00 | P     | 73.57  | NETO2        | 16q11          |
| 228360_at    | 1.00 | 0.97 | P     | 286.93  | 0.07 | 0.01 | A     | 21.63  | LOC130576    | 2q23.3         |
| 213293_s_at  | 0.99 | 0.95 | P     | 145.37  | 0.07 | 0.02 | A     | 11.87  | TRIM22       | 11p15          |
| 40093_at     | 0.96 | 0.87 | P     | 197.33  | 0.07 | 0.00 | A     | 14.53  | LU           | 19q13.2        |
| 238493_at    | 1.00 | 0.98 | P     | 137.60  | 0.07 | 0.00 | P,A   | 10.17  | ZNF505       | 19p13.11       |
| 205514_at    | 1.00 | 0.97 | P     | 180.23  | 0.07 | 0.01 | A     | 14.30  | ZNF415       | 19q13.42       |
| 235304_at    | 0.99 | 0.92 | P     | 60.00   | 0.07 | 0.01 | A     | 4.73   |              |                |
| 239853_at    | 0.99 | 0.93 | P     | 130.33  | 0.08 | 0.02 | A     | 10.80  | KLC2L        | 19q13          |
| 225354_s_at  | 0.98 | 0.91 | P     | 170.83  | 0.08 | 0.01 | A     | 13.57  | SH3BGR2      | 6q13-15        |
| 221541_at    | 1.00 | 0.99 | P     | 760.73  | 0.08 | 0.01 | A     | 58.73  | DKFZP434B044 | 16q24.1        |
| 219797_at    | 1.00 | 0.97 | P     | 127.90  | 0.08 | 0.02 | A     | 10.47  | MGAT4A       | 2q12           |
| 1569241_a_at | 0.98 | 0.90 | P     | 45.20   | 0.08 | 0.01 | A     | 3.57   | ZNF505       | 19p13.11       |
| 223427_s_at  | 0.94 | 0.83 | P     | 189.70  | 0.08 | 0.00 | P     | 14.43  | EPB41L4B     | 9q31-q32       |
| 235343_at    | 1.00 | 0.97 | P     | 72.57   | 0.08 | 0.00 | A     | 5.40   | FLJ12505     | 1q32.3         |
| 228320_x_at  | 0.99 | 0.93 | P,A   | 159.77  | 0.08 | 0.01 | A     | 12.77  | LOC92558     | 12q24.31       |
| 225258_at    | 1.00 | 0.95 | P     | 763.87  | 0.08 | 0.01 | A     | 61.10  | FBLP-1       | 1p36.13        |
| 212339_at    | 0.99 | 0.92 | P,A   | 134.97  | 0.08 | 0.02 | A     | 11.73  | EPB41L1      | 20q11.2-q12    |
| 231215_at    | 1.00 | 0.97 | P     | 64.63   | 0.08 | 0.01 | P,A   | 5.13   |              |                |
| 220161_s_at  | 0.99 | 0.93 | P     | 731.23  | 0.08 | 0.00 | M,A   | 56.07  | EPB41L4B     | 9q31-q32       |
| 239744_at    | 0.98 | 0.91 | P     | 255.47  | 0.08 | 0.00 | A     | 19.37  |              |                |
| 204401_at    | 0.99 | 0.93 | P     | 1332.23 | 0.08 | 0.00 | A     | 103.30 | KCNN4        | 19q13.2        |
| 226932_at    | 0.99 | 0.93 | P     | 439.50  | 0.08 | 0.01 | A     | 35.57  | SSPN         | 12p11.2        |
| 221646_s_at  | 0.99 | 0.92 | P     | 219.13  | 0.08 | 0.00 | P,A   | 16.80  |              |                |
| 226001_at    | 0.99 | 0.94 | P     | 1500.07 | 0.08 | 0.00 | P     | 114.90 | KLHL5        | 4p14           |
| 218834_s_at  | 1.00 | 0.98 | P     | 269.83  | 0.08 | 0.01 | A     | 21.70  | HSPA5BP1     | 11q12.2        |
| 209035_at    | 0.98 | 0.91 | P     | 237.20  | 0.08 | 0.00 | A     | 18.27  | MDK          | 11p11.2        |
| 203687_at    | 0.94 | 0.82 | P     | 275.70  | 0.08 | 0.02 | A     | 23.63  | CX3CL1       | 16q13          |
| 236616_at    | 0.99 | 0.94 | P     | 205.40  | 0.08 | 0.00 | A     | 15.97  |              |                |
| 220177_s_at  | 1.00 | 0.99 | P     | 230.43  | 0.08 | 0.01 | A     | 18.60  | TMPRSS3      | 21q22.3        |
| 211712_s_at  | 0.99 | 0.93 | P,M   | 61.47   | 0.08 | 0.00 | A     | 4.83   | ANXA9        | 1q21           |
| 238983_at    | 0.99 | 0.94 | P     | 63.93   | 0.08 | 0.01 | A     | 5.23   | FLJ14001     | 4p14           |
| 205759_s_at  | 1.00 | 0.98 | P     | 378.97  | 0.08 | 0.00 | A     | 29.23  | SULT2B1      | 19q13.3        |
| 201578_at    | 1.00 | 0.96 | P     | 310.03  | 0.08 | 0.00 | A     | 24.30  | PODXL        | 7q32-q33       |
| 241400_at    | 0.99 | 0.91 | P     | 242.80  | 0.08 | 0.00 | A     | 18.80  |              |                |

|              |      |      |       |         |      |      |     |        |           |                |
|--------------|------|------|-------|---------|------|------|-----|--------|-----------|----------------|
| 229796_at    | 1.00 | 0.98 | P,A   | 66.40   | 0.08 | 0.00 | A   | 5.30   |           |                |
| 240432_x_at  | 0.98 | 0.90 | P     | 308.97  | 0.08 | 0.01 | A   | 25.57  |           |                |
| 205891_at    | 1.00 | 0.97 | P     | 605.30  | 0.08 | 0.00 | A   | 48.97  | ADORA2B   | 17p12-p11.2    |
| 219411_at    | 0.99 | 0.94 | P     | 240.60  | 0.08 | 0.01 | A   | 20.57  | ELMO3     | 16q22.1        |
| 225314_at    | 1.00 | 0.97 | P     | 737.37  | 0.08 | 0.00 | A   | 58.33  | MGC45416  | 4p12           |
| 239250_at    | 1.00 | 0.99 | P     | 245.27  | 0.08 | 0.01 | P,A | 20.13  | ZNF542    | 19q13.43       |
| 222746_s_at  | 1.00 | 0.97 | P     | 422.93  | 0.08 | 0.00 | P,M | 34.17  | BSPRY     | 9q33.1         |
| 243998_at    | 0.99 | 0.92 | P,A   | 10.87   | 0.08 | 0.01 | A   | 0.90   | MGC45562  | 17q21.2        |
| 232297_at    | 0.98 | 0.91 | P     | 367.63  | 0.08 | 0.00 | P   | 29.27  | KLHL5     | 4p14           |
| 206722_s_at  | 0.99 | 0.92 | P,A   | 292.80  | 0.08 | 0.02 | A   | 25.73  | EDG4      | 19p12          |
| 228121_at    | 0.99 | 0.93 | P     | 1217.07 | 0.08 | 0.00 | P   | 98.13  | TGFβ2     | 1q41           |
| 220197_at    | 1.00 | 0.97 | P     | 317.77  | 0.08 | 0.00 | A   | 26.30  | ATP6V0A4  | 7q33-q34       |
| 218888_s_at  | 0.97 | 0.89 | P     | 958.77  | 0.08 | 0.01 | P   | 79.17  | NETO2     | 16q11          |
| 1556090_at   | 1.00 | 0.98 | P,A   | 32.27   | 0.08 | 0.01 | A   | 2.73   | HSMPP8    | 13q12.11       |
| 210827_s_at  | 1.00 | 0.96 | P     | 522.87  | 0.08 | 0.00 | A   | 42.93  | ELF3      | 1q32.2         |
| 203126_at    | 0.99 | 0.94 | P     | 2292.27 | 0.08 | 0.00 | P   | 184.17 | IMPA2     | 18p11.2        |
| 204720_s_at  | 1.00 | 0.98 | P     | 528.37  | 0.08 | 0.00 | P   | 42.63  | DNAJC6    | 1pter-q31.3    |
| 237031_at    | 0.99 | 0.94 | P,M,A | 101.00  | 0.08 | 0.00 | A   | 8.23   |           | 11q13.3        |
| 217593_at    | 1.00 | 0.99 | P     | 156.07  | 0.08 | 0.01 | A   | 13.03  | FLJ12895  | 19q13.43       |
| 1567032_s_at | 0.93 | 0.82 | P,A   | 29.40   | 0.08 | 0.02 | A   | 2.63   | ZNF160    | 19q13.42       |
| 210026_s_at  | 1.00 | 0.99 | P,M   | 289.33  | 0.08 | 0.01 | A   | 24.50  | CARD10    | 22q13.1        |
| 228221_at    | 1.00 | 0.96 | P     | 387.57  | 0.08 | 0.00 | A   | 31.70  | MGC45474  | 1p22.1         |
| 218764_at    | 1.00 | 0.98 | P     | 205.70  | 0.08 | 0.00 | A   | 16.90  | PRKCH     | 14q22-q23      |
| 203287_at    | 1.00 | 0.96 | P     | 799.27  | 0.08 | 0.00 | A   | 66.63  | LAD1      | 1q25.1-q32.3   |
| 1555904_at   | 0.98 | 0.90 | P,A   | 23.43   | 0.08 | 0.02 | A   | 2.10   | 13CDNA73  | 13q12.3        |
| 229616_s_at  | 1.00 | 0.96 | P     | 636.57  | 0.08 | 0.00 | A   | 52.40  | LOC196996 | 15q22.33       |
| 215471_s_at  | 0.97 | 0.87 | P,A   | 247.23  | 0.08 | 0.02 | A   | 23.37  | MAP7      | 6p23.2         |
| 227492_at    | 0.98 | 0.90 | P     | 579.87  | 0.08 | 0.00 | P   | 48.57  | OCLN      | 5q13.1         |
| 201242_s_at  | 1.00 | 0.96 | P     | 2376.23 | 0.08 | 0.00 | P   | 197.90 | ATP1B1    | 1q24           |
| 230370_x_at  | 0.99 | 0.94 | P     | 491.93  | 0.08 | 0.00 | P,A | 41.23  | MK-STYX   | 7q11.23        |
| 214022_s_at  | 0.99 | 0.94 | P     | 399.83  | 0.08 | 0.00 | P   | 33.17  | IFITM1    | 11p15.5        |
| 228153_at    | 0.99 | 0.95 | P     | 1793.47 | 0.08 | 0.00 | P   | 150.13 | IBRDC2    | 6p22.3         |
| 235293_at    | 0.99 | 0.95 | P     | 138.27  | 0.09 | 0.01 | A   | 12.03  |           |                |
| 217904_s_at  | 0.99 | 0.94 | P     | 280.63  | 0.09 | 0.01 | A   | 25.10  | BACE1     | 11q23.2-q23.3  |
| 203365_s_at  | 0.99 | 0.93 | P     | 151.87  | 0.09 | 0.00 | A   | 12.83  | MMP15     | 16q13-q21      |
| 235687_at    | 0.97 | 0.88 | P,A   | 68.07   | 0.09 | 0.00 | A   | 5.73   | ZNF626    | 19p13.11       |
| 229638_at    | 1.00 | 0.98 | P     | 2392.40 | 0.09 | 0.00 | P   | 201.60 | IRX3      | 16q12.2        |
| 213429_at    | 1.00 | 0.95 | P,M   | 127.63  | 0.09 | 0.01 | A   | 11.53  |           |                |
| 207943_x_at  | 0.99 | 0.95 | P     | 181.27  | 0.09 | 0.01 | A   | 15.83  | PLAGL1    | 6q24-q25       |
| 218005_at    | 1.00 | 0.98 | P     | 481.80  | 0.09 | 0.00 | A   | 40.77  | ZNF22     | 10q11          |
| 226372_at    | 1.00 | 0.97 | P     | 133.70  | 0.09 | 0.01 | A   | 11.97  | CHST11    | 12q            |
| 225822_at    | 1.00 | 0.98 | P     | 681.87  | 0.09 | 0.00 | A   | 59.20  | MGC17299  | 1p34.1         |
| 228042_at    | 1.00 | 0.96 | P,A   | 34.80   | 0.09 | 0.00 | A   | 2.97   | ADPRH     | 3q13.31-q13.33 |
| 1555173_at   | 0.98 | 0.89 | P     | 193.83  | 0.09 | 0.01 | A   | 16.87  |           |                |
| 213424_at    | 0.99 | 0.92 | P     | 213.40  | 0.09 | 0.00 | P   | 18.40  | KIAA0895  | 7p14.1         |
| 201798_s_at  | 1.00 | 0.96 | P     | 2554.30 | 0.09 | 0.00 | P   | 217.83 | FER1L3    | 10q24          |
| 205769_at    | 1.00 | 0.97 | P     | 183.13  | 0.09 | 0.00 | A   | 16.03  | SLC27A2   | 15q21.2        |
| 238570_at    | 0.99 | 0.95 | P     | 114.00  | 0.09 | 0.01 | A   | 10.57  | ZNF83     | 19q13.3        |
| 244297_at    | 0.97 | 0.88 | P     | 99.27   | 0.09 | 0.03 | A   | 9.83   | FLJ35740  | 9p12           |
| 208596_s_at  | 0.95 | 0.85 | P     | 332.90  | 0.09 | 0.01 | A   | 29.90  | UGT1A10   | 2q37           |
| 231175_at    | 1.00 | 0.97 | P     | 71.70   | 0.09 | 0.00 | A   | 6.13   | C6orf65   | 6p12.1         |
| 204952_at    | 0.99 | 0.93 | P     | 709.80  | 0.09 | 0.00 | A   | 62.83  | C4.4A     | 19q13.32       |
| 219528_s_at  | 1.00 | 0.98 | P     | 188.30  | 0.09 | 0.01 | P,A | 17.00  | BCL11B    | 14q32.31       |
| 226069_at    | 1.00 | 0.97 | P     | 85.20   | 0.09 | 0.02 | A   | 8.20   | PRICKLE1  | 12q12          |
| 205926_at    | 0.99 | 0.94 | P     | 367.10  | 0.09 | 0.00 | A   | 32.30  | IL27RA    | 19p13.11       |
| 206712_at    | 0.99 | 0.92 | P,A   | 41.43   | 0.09 | 0.00 | A   | 3.60   | GRTP1     | 13q34          |
| 206314_at    | 0.96 | 0.86 | P,A   | 23.83   | 0.09 | 0.01 | A   | 2.17   | ZNF167    | 3p22.3-p21.1   |
| 58916_at     | 1.00 | 0.98 | P     | 249.90  | 0.09 | 0.00 | P   | 21.77  | KCTD14    | 11q13.4        |
| 204597_x_at  | 1.00 | 0.99 | P     | 204.77  | 0.09 | 0.01 | A   | 18.70  | STC1      | 8p21-p11.2     |
| 206272_at    | 1.00 | 0.97 | P     | 189.77  | 0.09 | 0.00 | P,A | 17.00  | SPHAR     | 1q42.11-q42.3  |
| 228391_at    | 1.00 | 0.95 | P     | 214.70  | 0.09 | 0.00 | P,A | 18.83  | CYP4V2    | 4q35.1         |
| 238827_at    | 0.96 | 0.86 | P,A   | 170.53  | 0.09 | 0.00 | A   | 15.00  |           |                |
| 210002_at    | 1.00 | 0.99 | P     | 149.93  | 0.09 | 0.01 | A   | 13.70  | GATA6     | 18q11.1-q11.2  |
| 243788_at    | 0.98 | 0.91 | P,A   | 17.53   | 0.09 | 0.01 | A   | 1.60   |           |                |
| 203920_at    | 1.00 | 0.98 | P     | 453.80  | 0.09 | 0.00 | A   | 39.93  | NR1H3     | 11p11.2        |
| 209546_s_at  | 0.99 | 0.93 | P,A   | 70.17   | 0.09 | 0.01 | A   | 6.47   | APOL1     | 22q13.1        |
| 1557283_a_at | 1.00 | 0.97 | P     | 68.20   | 0.09 | 0.00 | A   | 6.07   | ZNF519    | 18p11.21       |
| 212859_x_at  | 1.00 | 0.99 | P     | 1973.20 | 0.09 | 0.00 | P   | 175.17 | MT1E      | 16q13          |
| 232079_s_at  | 0.95 | 0.84 | P     | 300.90  | 0.09 | 0.01 | A   | 28.13  | PVRL2     | 19q13.2-q13.4  |
| 226068_at    | 1.00 | 0.97 | P     | 296.73  | 0.09 | 0.01 | A   | 27.60  | SYK       | 9q22           |
| 243582_at    | 1.00 | 0.97 | P     | 265.13  | 0.09 | 0.00 | A   | 23.67  | SH3RF2    | 5q32           |
| 240457_at    | 1.00 | 0.96 | P     | 35.33   | 0.09 | 0.02 | A   | 3.43   |           |                |
| 202552_s_at  | 1.00 | 0.98 | P     | 606.40  | 0.09 | 0.00 | P   | 55.00  | CRIM1     | 2p21           |
| 241990_at    | 1.00 | 0.99 | P     | 138.90  | 0.09 | 0.00 | A   | 12.83  | RHOV      | 15q13.3        |
| 232609_at    | 0.98 | 0.91 | P     | 234.37  | 0.09 | 0.01 | A   | 22.10  | CRB3      | 19p13.3        |
| 1558888_x_at | 0.95 | 0.83 | P,A   | 24.40   | 0.09 | 0.00 | A   | 2.20   | MGC35402  | 19q13.42       |
| 212706_at    | 1.00 | 0.96 | P     | 68.53   | 0.09 | 0.01 | A   | 6.63   | RASA4     | 7q22-q31.1     |
| 202768_at    | 1.00 | 0.99 | P,A   | 82.93   | 0.09 | 0.00 | A   | 7.47   | FOSB      | 19q13.32       |
| 210261_at    | 0.93 | 0.82 | P     | 106.67  | 0.09 | 0.02 | A   | 10.40  | KCNK2     | 1q41           |
| 227674_at    | 1.00 | 0.95 | P     | 100.60  | 0.09 | 0.01 | A   | 9.33   | ZNF585A   | 19q13.13       |
| 1552648_a_at | 1.00 | 0.97 | P     | 102.70  | 0.09 | 0.00 | A   | 9.30   | TNFRSF10A | 8p21           |
| 235648_at    | 0.99 | 0.94 | P     | 261.57  | 0.09 | 0.00 | P,A | 24.40  | ZNF567    | 19q13.13       |
| 225651_at    | 1.00 | 0.96 | P     | 200.80  | 0.09 | 0.00 | M,A | 18.30  | UBE2E2    | 3p24.2         |
| 223232_s_at  | 0.99 | 0.94 | P,M,A | 133.43  | 0.09 | 0.01 | A   | 12.93  | CGN       | 1q21           |
| 226755_at    | 0.97 | 0.88 | P     | 134.87  | 0.09 | 0.02 | A   | 13.47  |           | 1q32.2         |
| 229276_at    | 0.97 | 0.89 | P,A   | 91.53   | 0.09 | 0.00 | A   | 8.60   | IGSF9     | 1q22-q23       |
| 1568836_at   | 1.00 | 0.98 | P     | 102.50  | 0.09 | 0.01 | P,A | 10.30  |           |                |
| 209212_s_at  | 0.99 | 0.93 | P     | 348.60  | 0.09 | 0.00 | A   | 33.10  | KLF5      | 13q21.33       |
| 225001_at    | 0.99 | 0.95 | P     | 1505.07 | 0.09 | 0.00 | P,A | 138.83 | RAB3D     | 19p13.2        |
| 235463_s_at  | 1.00 | 0.99 | P     | 194.43  | 0.09 | 0.00 | P   | 18.00  | LASS6     | 2q31.1         |
| 227834_at    | 0.99 | 0.92 | P,A   | 13.67   | 0.09 | 0.01 | A   | 1.30   | C6orf198  | 6q23.3         |
| 242979_at    | 1.00 | 0.98 | P     | 100.20  | 0.09 | 0.01 | A   | 10.03  |           |                |
| 204470_at    | 1.00 | 0.96 | P     | 117.30  | 0.09 | 0.00 | P,M | 10.90  | CXCL2     | 4q21           |
| 203817_at    | 1.00 | 0.96 | P     | 326.00  | 0.09 | 0.01 | A   | 32.27  | GUCY1B3   | 4q31.3-q33     |
| 218611_at    | 1.00 | 0.99 | P     | 2797.23 | 0.09 | 0.00 | P   | 258.50 | IER5      | 1q25.1         |
| 201462_at    | 1.00 | 0.97 | P     | 1671.03 | 0.09 | 0.00 | P   | 154.60 | SCRN1     | 7p14.3-p14.1   |

|              |      |      |       |         |      |      |     |        |               |                 |
|--------------|------|------|-------|---------|------|------|-----|--------|---------------|-----------------|
| 223616_at    | 0.93 | 0.82 | P,A   | 73.80   | 0.09 | 0.01 | A   | 7.13   | FLJ12644      | 19q13.41        |
| 230356_at    | 0.99 | 0.94 | P     | 168.43  | 0.10 | 0.00 | A   | 16.20  |               |                 |
| 57588_at     | 1.00 | 0.97 | P     | 111.07  | 0.10 | 0.02 | A   | 11.70  | SLC24A3       | 20p13           |
| 207705_s_at  | 0.99 | 0.94 | P     | 342.87  | 0.10 | 0.00 | P,A | 32.23  | KIAA0980      | 20p11.22-p11.1  |
| 227998_at    | 1.00 | 0.96 | P     | 4515.20 | 0.10 | 0.00 | P   | 424.93 | S100A16       |                 |
| 228082_at    | 0.88 | 0.75 | P,A   | 42.90   | 0.10 | 0.01 | A   | 4.37   | ASAM          | 11q24.1         |
| 229657_at    | 1.00 | 0.98 | P     | 186.50  | 0.10 | 0.00 | A   | 17.80  | THR8          | 3p24.3          |
| 222582_at    | 0.99 | 0.95 | P     | 170.67  | 0.10 | 0.00 | P   | 16.20  | PRKAG2        | 7q35-q36        |
| 39966_at     | 1.00 | 1.00 | P     | 235.83  | 0.10 | 0.00 | P   | 22.70  | CSPG5         | 3p21.3          |
| 203756_at    | 1.00 | 0.97 | P,A   | 226.60  | 0.10 | 0.01 | A   | 22.20  | ARHGEF17      | 11q13.3         |
| 230774_at    | 1.00 | 0.98 | P     | 151.43  | 0.10 | 0.00 | P   | 14.83  | ZADH1         | 14q24.2         |
| 218803_at    | 1.00 | 0.99 | P     | 487.57  | 0.10 | 0.00 | P   | 46.40  | CHFR          | 12q24.33        |
| 226865_at    | 1.00 | 0.97 | P     | 213.93  | 0.10 | 0.01 | A   | 21.27  |               |                 |
| 236089_at    | 0.99 | 0.92 | P     | 49.93   | 0.10 | 0.02 | A   | 5.33   |               |                 |
| 223948_s_at  | 0.96 | 0.86 | P,A   | 125.23  | 0.10 | 0.00 | A   | 12.10  | TMPRSS3       | 21q22.3         |
| 228256_s_at  | 1.00 | 0.98 | P     | 224.93  | 0.10 | 0.00 | A   | 21.87  | TIGA1         | 5q21-q22        |
| 204151_x_at  | 1.00 | 0.98 | P     | 447.50  | 0.10 | 0.01 | P,A | 45.27  | AKR1C1        | 10p15-p14       |
| 221729_at    | 1.00 | 0.95 | P     | 930.03  | 0.10 | 0.00 | P   | 89.27  | COL5A2        | 2q14-q32        |
| 213415_at    | 1.00 | 0.95 | P,A   | 15.87   | 0.10 | 0.01 | A   | 1.67   | CLIC2         | xq28            |
| 228625_at    | 1.00 | 0.96 | P     | 422.13  | 0.10 | 0.00 | A   | 40.87  | CITED4        | 1p34.1          |
| 203962_s_at  | 0.99 | 0.92 | P     | 195.47  | 0.10 | 0.01 | A   | 19.47  | NEBL          | 10p12           |
| 243539_at    | 0.99 | 0.91 | P     | 317.00  | 0.10 | 0.00 | P   | 30.33  | KIAA1841      | 2q14            |
| 224746_at    | 1.00 | 0.98 | P     | 827.47  | 0.10 | 0.00 | A   | 80.47  | KIAA1522      | 1p34.3          |
| 212560_at    | 1.00 | 0.99 | P     | 1387.13 | 0.10 | 0.00 | P   | 133.73 | SORL1         | 11q23.2-q24.2   |
| 205933_at    | 1.00 | 0.97 | P     | 121.63  | 0.10 | 0.01 | A   | 12.00  | SETBP1        | 18q21.1         |
| 202551_s_at  | 1.00 | 0.95 | P     | 823.23  | 0.10 | 0.00 | P   | 80.57  | CRIM1         | 2p21            |
| 207949_s_at  | 1.00 | 0.96 | P     | 250.30  | 0.10 | 0.01 | A   | 25.87  | ICA1          | 7p22            |
| 204484_at    | 0.99 | 0.93 | P     | 567.90  | 0.10 | 0.01 | A   | 60.30  | PIK3C2B       | 1q32            |
| 223642_at    | 0.99 | 0.93 | P     | 242.03  | 0.10 | 0.01 | A   | 25.70  | ZIC2          | 13q32           |
| 223709_s_at  | 0.99 | 0.94 | P     | 389.13  | 0.10 | 0.00 | P,A | 38.20  | WNT10A        | 2q35            |
| 230076_at    | 1.00 | 0.96 | P     | 259.20  | 0.10 | 0.00 | A   | 25.37  | FLJ10156      | 17p13.2         |
| 219489_s_at  | 0.99 | 0.94 | P     | 432.37  | 0.10 | 0.01 | P   | 45.13  | RHBDL2        | 1p34.2          |
| 202269_x_at  | 1.00 | 0.98 | P     | 404.93  | 0.10 | 0.01 | P   | 40.63  | GBP1          | 1p22.2          |
| 227404_s_at  | 0.99 | 0.94 | P     | 2528.97 | 0.10 | 0.00 | P   | 250.33 | EGR1          | 5q31.1          |
| 1560776_at   | 0.97 | 0.87 | P     | 68.83   | 0.10 | 0.01 | A   | 6.97   |               |                 |
| 221810_at    | 0.99 | 0.92 | P     | 234.10  | 0.10 | 0.01 | A   | 23.93  | RAB15         | 14q23.3         |
| 221655_x_at  | 1.00 | 0.96 | P,A   | 508.53  | 0.10 | 0.00 | A   | 50.60  | EPS8L1        | 19q13.42        |
| 209114_at    | 0.99 | 0.94 | P,M,A | 198.13  | 0.10 | 0.01 | A   | 21.10  | TSPAN-1       | 1p34.1          |
| 238846_at    | 1.00 | 0.97 | P     | 228.53  | 0.10 | 0.00 | P,M | 23.00  | TNFRSF11A     | 18q22.1         |
| 235176_at    | 1.00 | 0.96 | P     | 134.80  | 0.10 | 0.01 | A   | 13.80  | ZNF545        | 19q13.13        |
| 228340_at    | 1.00 | 0.96 | P     | 427.37  | 0.10 | 0.00 | A   | 43.00  | TLE3          | 15q22           |
| 227180_at    | 0.97 | 0.87 | P     | 75.67   | 0.10 | 0.01 | A   | 8.13   | ELOVL7        | 5q12.1          |
| 228260_at    | 1.00 | 0.96 | P     | 269.50  | 0.10 | 0.00 | P,A | 27.63  | ELAVL2        | 9p21            |
| 227429_at    | 1.00 | 0.96 | P     | 282.80  | 0.10 | 0.01 | A   | 30.20  | MGC45840      | 11p15.5         |
| 222136_x_at  | 1.00 | 0.97 | P,M   | 163.07  | 0.10 | 0.01 | A   | 17.47  | ZNF43         | 19p13.1-p12     |
| 217025_s_at  | 0.99 | 0.92 | P     | 380.17  | 0.10 | 0.01 | P   | 39.27  | DBN1          | 5q35.3          |
| 203317_at    | 0.99 | 0.95 | P     | 120.30  | 0.10 | 0.02 | A   | 13.53  | TIC           | 2q13            |
| 214734_at    | 1.00 | 0.96 | P     | 461.10  | 0.10 | 0.00 | A   | 46.73  | SLAC2-B       | 11q23.1         |
| 238688_at    | 0.99 | 0.93 | P     | 380.63  | 0.10 | 0.02 | A   | 41.43  | TPM1          | 15q22.1         |
| 204112_s_at  | 0.99 | 0.94 | P     | 972.70  | 0.10 | 0.00 | P   | 98.97  | HNMT          | 2q22.1          |
| 212299_at    | 0.98 | 0.90 | P     | 216.33  | 0.10 | 0.02 | A   | 23.27  | NEK9          | 14q24.2         |
| 227342_s_at  | 1.00 | 0.98 | P     | 508.03  | 0.10 | 0.00 | A   | 51.73  | MYEOV         | 11q13           |
| 1560570_a_at | 0.94 | 0.83 | P,A   | 4.37    | 0.10 | 0.01 | A   | 0.47   |               |                 |
| 1563498_s_at | 0.97 | 0.87 | P     | 78.97   | 0.10 | 0.03 | P,A | 8.97   | LOC283130     | 11q13.1         |
| 1552848_a_at | 1.00 | 0.98 | P     | 295.00  | 0.10 | 0.00 | A   | 30.43  | FLJ30296      | xp22.13         |
| 1553995_a_at | 0.98 | 0.89 | P     | 149.77  | 0.10 | 0.00 | A   | 15.60  | NT5E          | 6q14-q21        |
| 206746_at    | 0.99 | 0.92 | P     | 98.87   | 0.10 | 0.01 | A   | 10.27  | BFSP1         | 20p11.23-p12.1  |
| 217585_at    | 0.97 | 0.87 | P     | 50.00   | 0.10 | 0.02 | A   | 5.60   | NEBL          | 10p12           |
| 223535_at    | 1.00 | 0.97 | P     | 209.93  | 0.10 | 0.00 | P   | 21.60  | NUDT12        | 5q21.3          |
| 204044_at    | 1.00 | 0.97 | P     | 381.00  | 0.10 | 0.01 | A   | 39.97  | QPRT          | 16p12.1         |
| 208623_s_at  | 1.00 | 0.99 | P     | 2414.27 | 0.10 | 0.00 | P   | 249.53 | VIL2          | 6q25.2-q26      |
| 207574_s_at  | 0.99 | 0.95 | P     | 508.87  | 0.10 | 0.00 | P,A | 52.23  | GADD45B       | 19p13.3         |
| 1552477_a_at | 0.99 | 0.93 | P     | 113.73  | 0.10 | 0.00 | A   | 11.73  | IRF6          | 1q32.3-q41      |
| 218454_at    | 1.00 | 0.97 | P     | 374.50  | 0.10 | 0.00 | A   | 39.17  | FLJ22662      | 12p13.2         |
| 1558508_a_at | 1.00 | 0.95 | P     | 299.40  | 0.11 | 0.00 | P,A | 31.30  |               | 1q31.3          |
| 230460_at    | 0.99 | 0.92 | P,A   | 103.83  | 0.11 | 0.01 | A   | 11.00  |               |                 |
| 219416_at    | 1.00 | 0.97 | P,A   | 99.43   | 0.11 | 0.00 | A   | 10.70  | SCARA3        | 8p21            |
| 203476_at    | 0.99 | 0.95 | P     | 2684.23 | 0.11 | 0.00 | P   | 281.17 | TPBG          | 6q14-q15        |
| 1568617_a_at | 0.99 | 0.92 | P     | 157.20  | 0.11 | 0.01 | A   | 17.33  | KIAA1543      | 19p13.3-p13.2   |
| 227692_at    | 0.98 | 0.90 | P     | 52.67   | 0.11 | 0.02 | A   | 6.07   | GNAI1         | 7q21            |
| 219513_s_at  | 0.99 | 0.93 | P     | 116.93  | 0.11 | 0.00 | A   | 12.50  | SH2D3A        | 19p13.3         |
| 202267_at    | 1.00 | 0.99 | P     | 173.10  | 0.11 | 0.01 | A   | 19.00  | LAMC2         | 1q25-q31        |
| 206758_at    | 0.98 | 0.91 | P,A   | 100.57  | 0.11 | 0.01 | A   | 11.43  | EDN2          | 1p34            |
| 203918_at    | 1.00 | 0.96 | P     | 208.07  | 0.11 | 0.02 | A   | 23.37  | PCDH1         | 5q32-q33        |
| 227228_s_at  | 0.99 | 0.94 | P     | 123.27  | 0.11 | 0.01 | A   | 14.10  | KIAA1509      | 14q32.12        |
| 233026_s_at  | 0.97 | 0.87 | P,A   | 18.10   | 0.11 | 0.01 | A   | 2.03   | PDZK3         | 5p13.3          |
| 202270_at    | 1.00 | 0.97 | P     | 440.97  | 0.11 | 0.00 | P   | 46.73  | GBP1          | 1p22.2          |
| 218552_at    | 1.00 | 0.98 | P     | 331.77  | 0.11 | 0.00 | A   | 35.40  | FLJ10948      | 1p32.3          |
| 242350_s_at  | 1.00 | 0.96 | P     | 280.30  | 0.11 | 0.01 | M,A | 32.00  |               |                 |
| 223432_at    | 0.99 | 0.93 | P     | 202.77  | 0.11 | 0.01 | A   | 22.37  | OSBP2         | 22q12.2         |
| 219922_s_at  | 1.00 | 0.99 | P     | 471.93  | 0.11 | 0.00 | P,A | 51.37  | LTPB3         | 11q12           |
| 212314_at    | 1.00 | 0.96 | P     | 191.00  | 0.11 | 0.01 | A   | 21.60  | KIAA0746      | 4p15.31         |
| 207126_x_at  | 1.00 | 0.97 | P     | 458.80  | 0.11 | 0.01 | P   | 51.33  | UGT1A10       | 2q37            |
| 202525_at    | 1.00 | 0.98 | P     | 332.03  | 0.11 | 0.00 | A   | 36.23  | PRSS8         | 16p11.2         |
| 235085_at    | 0.99 | 0.92 | P     | 601.57  | 0.11 | 0.00 | M,A | 65.63  | DKFZp761P0423 | 8p23.1          |
| 229053_at    | 1.00 | 0.97 | P     | 71.47   | 0.11 | 0.02 | A   | 8.33   | LOC51760      | 16p13.11        |
| 211535_s_at  | 1.00 | 0.96 | P     | 244.13  | 0.11 | 0.01 | A   | 27.50  | FGFR1         | 8p11.2-p11.1    |
| 1560285_at   | 0.98 | 0.90 | P,A   | 40.70   | 0.11 | 0.01 | A   | 4.77   |               |                 |
| 1552691_at   | 1.00 | 0.96 | P     | 61.77   | 0.11 | 0.01 | P,A | 7.03   | ARL11         | 13q14.12        |
| 208131_s_at  | 0.99 | 0.92 | P     | 332.13  | 0.11 | 0.01 | A   | 38.33  | PTGIS         | 20q13.11-q13.13 |
| 236635_at    | 1.00 | 0.95 | P     | 222.40  | 0.11 | 0.01 | M,A | 25.33  | FLJ14011      | 19q13.43        |
| 205481_at    | 1.00 | 0.96 | P     | 353.87  | 0.11 | 0.00 | P,A | 39.20  | ADORA1        | 1q32.1          |
| 210397_at    | 0.98 | 0.89 | P     | 170.10  | 0.11 | 0.01 | A   | 19.97  | DEFB1         | 8p23.2-p23.1    |
| 207722_s_at  | 0.99 | 0.92 | P     | 165.73  | 0.11 | 0.01 | A   | 18.77  | BTBD2         | 19p13.3         |
| 218692_at    | 1.00 | 0.96 | P     | 321.63  | 0.11 | 0.00 | P,A | 36.70  | FLJ20366      | 8q23.2          |
| 226405_s_at  | 1.00 | 0.98 | P     | 469.53  | 0.11 | 0.00 | P   | 52.50  | ARRDC1        | 9q34.3          |

|              |      |      |       |         |      |      |       |        |           |               |
|--------------|------|------|-------|---------|------|------|-------|--------|-----------|---------------|
| 213894_at    | 0.99 | 0.94 | P     | 178.67  | 0.11 | 0.01 | A     | 20.97  | KIAA0960  | 7p21.3        |
| 220035_at    | 0.99 | 0.94 | P     | 209.07  | 0.11 | 0.01 | A     | 24.80  | NUP210    | 3p25.2-p25.1  |
| 225418_at    | 1.00 | 0.97 | P     | 533.80  | 0.11 | 0.00 | M,A   | 60.27  | PVRL2     | 19q13.2-q13.4 |
| 1559450_at   | 0.99 | 0.93 | P,A   | 17.67   | 0.11 | 0.01 | A     | 2.13   |           |               |
| 91826_at     | 0.97 | 0.88 | P     | 665.60  | 0.11 | 0.00 | A     | 74.27  | EPS8L1    | 19q13.42      |
| 228606_at    | 1.00 | 0.98 | P     | 749.80  | 0.11 | 0.00 | P     | 84.37  | MGC33212  | 3q29          |
| 202262_x_at  | 0.99 | 0.95 | P     | 595.47  | 0.11 | 0.00 | A     | 67.60  | DDAH2     | 6p21.3        |
| 204602_at    | 1.00 | 0.96 | P     | 1138.87 | 0.11 | 0.00 | P     | 130.00 | DKK1      | 10q11.2       |
| 201286_at    | 1.00 | 0.97 | P     | 606.37  | 0.11 | 0.00 | P     | 68.83  | SDC1      | 2p24.1        |
| 225129_at    | 1.00 | 0.97 | P     | 434.27  | 0.11 | 0.00 | P     | 49.27  | CPNE2     | 16q13         |
| 202812_at    | 1.00 | 0.99 | P     | 679.33  | 0.12 | 0.00 | P     | 76.90  | GAA       | 17q25.2-q25.3 |
| 203741_s_at  | 1.00 | 0.97 | P     | 149.97  | 0.12 | 0.00 | A     | 17.13  | ADCY7     | 16q12-q13     |
| 1553155_x_at | 0.98 | 0.91 | P     | 390.07  | 0.12 | 0.01 | P,A   | 45.70  | ATP6V0D2  | 8q21.13       |
| 229534_at    | 0.99 | 0.95 | P     | 218.40  | 0.12 | 0.00 | M,A   | 25.23  | PTE2B     | 14q24.2       |
| 1552849_at   | 0.99 | 0.94 | P,A   | 62.73   | 0.12 | 0.01 | A     | 7.70   | LOC130951 | 2p13.1        |
| 243174_at    | 0.99 | 0.95 | P     | 212.40  | 0.12 | 0.01 | P     | 26.17  |           |               |
| 228494_at    | 1.00 | 0.96 | P     | 124.00  | 0.12 | 0.00 | A     | 14.43  |           |               |
| 207018_s_at  | 0.97 | 0.88 | P     | 68.90   | 0.12 | 0.00 | A     | 7.97   | RAB27B    | 18q21.2       |
| 230534_at    | 0.97 | 0.88 | P     | 82.83   | 0.12 | 0.02 | A     | 10.03  | MGC15634  | 1q42.13       |
| 228249_at    | 1.00 | 0.98 | P     | 565.77  | 0.12 | 0.00 | M,A   | 65.93  | LOC119710 | 11p13         |
| 41469_at     | 1.00 | 0.98 | P     | 283.63  | 0.12 | 0.00 | A     | 33.07  | PI3       | 20q12-q13     |
| 55583_at     | 1.00 | 0.95 | P     | 233.50  | 0.12 | 0.00 | A     | 27.40  | DOCK6     | 19p13.2       |
| 1557458_s_at | 1.00 | 0.97 | P     | 641.03  | 0.12 | 0.00 | P,A   | 74.40  | SHB       | 9p12-p11      |
| 219517_at    | 1.00 | 0.97 | P     | 511.67  | 0.12 | 0.01 | P     | 60.60  | ELL3      | 15q15.1       |
| 228062_at    | 0.99 | 0.95 | P     | 82.13   | 0.12 | 0.01 | A     | 10.00  | NAP1L5    | 4q22.1        |
| 210973_s_at  | 0.93 | 0.82 | P,M,A | 170.40  | 0.12 | 0.02 | A     | 21.50  | FGFR1     | 8p11.2-p11.1  |
| 220296_at    | 0.94 | 0.82 | P,A   | 167.47  | 0.12 | 0.02 | A     | 20.57  | GALNT10   | 5q33.2        |
| 227134_at    | 0.99 | 0.92 | P     | 293.00  | 0.12 | 0.00 | A     | 34.60  | SYTL1     | 1p35.3        |
| 205428_s_at  | 1.00 | 0.97 | P     | 346.93  | 0.12 | 0.01 | A     | 42.00  | CALB2     | 16q22.2       |
| 201596_x_at  | 1.00 | 0.98 | P     | 6538.07 | 0.12 | 0.00 | P     | 769.10 | KRT18     | 12q13         |
| 233329_s_at  | 1.00 | 0.96 | P     | 562.77  | 0.12 | 0.00 | P     | 66.57  | LOC51315  | 2p11.2        |
| 201243_s_at  | 1.00 | 0.99 | P     | 1784.20 | 0.12 | 0.00 | P     | 209.97 | ATP1B1    | 1q24          |
| 218779_x_at  | 1.00 | 0.99 | P,M   | 778.47  | 0.12 | 0.00 | A     | 91.63  | EPS8L1    | 19q13.42      |
| 238819_at    | 0.99 | 0.92 | P     | 159.17  | 0.12 | 0.00 | M,A   | 19.10  | ZNF347    | 19q13.42      |
| 210674_s_at  | 1.00 | 0.96 | P     | 60.40   | 0.12 | 0.02 | A     | 7.50   | PCDHAC2   | 5q31          |
| 204908_s_at  | 0.99 | 0.92 | P     | 348.93  | 0.12 | 0.00 | P,A   | 42.47  | BCL3      | 19q13.1-q13.2 |
| 239847_at    | 1.00 | 0.98 | P     | 256.40  | 0.12 | 0.00 | P,M   | 30.30  |           |               |
| 1560512_at   | 1.00 | 0.98 | P     | 115.70  | 0.12 | 0.01 | A     | 14.10  |           |               |
| 244704_at    | 0.99 | 0.94 | P     | 121.13  | 0.12 | 0.01 | P,M,A | 15.10  | NFYB      | 12q22-q23     |
| 223194_s_at  | 1.00 | 0.97 | P     | 420.10  | 0.12 | 0.01 | A     | 51.43  | C6orf85   | 6p25.2        |
| 201079_at    | 1.00 | 0.98 | P     | 2432.40 | 0.12 | 0.00 | P     | 289.97 | SYNGR2    | 17q25.3       |
| 204202_at    | 0.99 | 0.94 | P     | 374.03  | 0.12 | 0.01 | P     | 45.67  | KIAA1023  | 7p22.3        |
| 235141_at    | 0.98 | 0.89 | P     | 379.27  | 0.12 | 0.00 | A     | 45.10  | MRVLDC2   | 5q13.1        |
| 242346_x_at  | 1.00 | 0.97 | P     | 324.40  | 0.12 | 0.00 | A     | 39.50  |           |               |
| 202806_at    | 0.99 | 0.94 | P     | 659.40  | 0.12 | 0.00 | A     | 79.13  |           |               |
| 212538_at    | 0.99 | 0.95 | P     | 1225.03 | 0.12 | 0.00 | P     | 146.80 | DBN1      | 5q35.3        |
| 217551_at    | 1.00 | 0.96 | P     | 360.87  | 0.12 | 0.00 | P,M   | 43.33  | DOCK9     | 13q32.3       |
| 212336_at    | 1.00 | 0.96 | P     | 138.53  | 0.12 | 0.00 | A     | 16.83  | EPB41L1   | 20q11.2-q12   |
| 203085_s_at  | 1.00 | 0.97 | P     | 164.37  | 0.12 | 0.00 | A     | 19.93  | TGFB1     | 19q13.1       |
| 219520_s_at  | 1.00 | 0.98 | P     | 320.47  | 0.12 | 0.01 | A     | 40.83  | KIAA1280  | xp22.32       |
| 35666_at     | 1.00 | 0.96 | P     | 1180.47 | 0.12 | 0.00 | P     | 141.83 | SEMA3F    | 3p21.3        |
| 213996_at    | 1.00 | 0.96 | P,M,A | 94.13   | 0.12 | 0.01 | A     | 11.60  | YPEL1     | 22q11.2       |
| 205349_at    | 0.97 | 0.88 | P,M   | 153.97  | 0.12 | 0.01 | A     | 18.83  | GNA15     | 19p13.3       |
| 221009_s_at  | 0.97 | 0.88 | P,M,A | 54.27   | 0.12 | 0.02 | A     | 7.27   | ANGPTL4   | 19p13.3       |
| 203468_at    | 0.99 | 0.92 | P     | 129.00  | 0.12 | 0.02 | P,A   | 16.57  | CDK10     | 16q24         |
| 209357_at    | 0.99 | 0.94 | P     | 1279.67 | 0.12 | 0.00 | P     | 155.13 | CITED2    | 6q23.3        |
| 203585_at    | 1.00 | 1.00 | P     | 1128.57 | 0.12 | 0.01 | P     | 140.77 | ZNF185    | xq28          |
| 223382_s_at  | 1.00 | 0.98 | P     | 1345.07 | 0.12 | 0.00 | P     | 162.63 | ZNRF1     | 16q22.3       |
| 203020_at    | 1.00 | 0.96 | P     | 561.73  | 0.12 | 0.00 | P     | 68.07  | HHL       | 1q24          |
| 206125_s_at  | 1.00 | 0.97 | P     | 376.43  | 0.12 | 0.00 | A     | 46.30  | KLK8      | 19q13.3-q13.4 |
| 209163_at    | 1.00 | 0.98 | P     | 889.53  | 0.12 | 0.00 | A     | 108.20 | CYB561    | 17q11-qter    |
| 1553994_at   | 1.00 | 0.98 | P     | 170.27  | 0.12 | 0.01 | M,A   | 21.70  | NT5E      | 6q14-q21      |
| 205485_at    | 0.98 | 0.91 | P     | 81.67   | 0.12 | 0.01 | A     | 10.33  | RYR1      | 19q13.1       |
| 213110_s_at  | 1.00 | 0.96 | P     | 1003.20 | 0.12 | 0.00 | P     | 122.97 | COL4A5    | xq22          |
| 232322_x_at  | 0.99 | 0.95 | P     | 925.03  | 0.12 | 0.00 | P,M   | 112.97 | STAR10    | 11q13         |
| 202887_s_at  | 0.99 | 0.93 | P     | 935.00  | 0.12 | 0.00 | A     | 114.10 | DDIT4     | 10pter-q26.12 |
| 236297_at    | 1.00 | 0.98 | P     | 71.70   | 0.12 | 0.02 | M,A   | 9.47   | PLXDC2    | 10p12.33      |
| 210547_x_at  | 0.98 | 0.90 | P     | 372.20  | 0.12 | 0.00 | A     | 46.30  | ICA1      | 7p22          |
| 209872_s_at  | 0.95 | 0.85 | P,A   | 156.37  | 0.12 | 0.01 | A     | 19.83  | PKP3      | 11p15         |
| 221730_at    | 0.98 | 0.91 | P     | 345.90  | 0.13 | 0.00 | P,M,A | 42.90  | COL5A2    | 2q14-q32      |
| 222227_at    | 1.00 | 0.99 | P     | 2210.77 | 0.13 | 0.00 | P     | 276.20 | ZNF236    | 18q22-q23     |
| 230610_at    | 0.99 | 0.93 | P,A   | 55.67   | 0.13 | 0.00 | A     | 6.93   | MCLC      | 1p13.3        |
| 241726_at    | 0.98 | 0.89 | P     | 99.57   | 0.13 | 0.00 | P,M   | 12.50  | HLCS      | 21q22.1       |
| 212444_at    | 1.00 | 0.95 | P     | 675.20  | 0.13 | 0.01 | P,A   | 85.50  | RAI3      | 12p13-p12.3   |
| 210387_at    | 1.00 | 0.96 | P     | 188.47  | 0.13 | 0.01 | A     | 24.13  | HIST1H2BG | 6p21.3        |
| 222830_at    | 0.99 | 0.93 | P     | 660.97  | 0.13 | 0.00 | P     | 82.77  | TFCP2L2   | 2p25.1        |
| 238466_at    | 0.99 | 0.94 | P,A   | 15.73   | 0.13 | 0.00 | A     | 1.97   |           |               |
| 205150_s_at  | 1.00 | 0.95 | P     | 161.30  | 0.13 | 0.00 | P,A   | 20.33  | KIAA0644  | 7p15.1        |
| 221942_s_at  | 1.00 | 0.96 | P     | 408.63  | 0.13 | 0.00 | A     | 51.23  | GUCY1A3   | 4q31.1-q31.2  |
| 236769_at    | 0.97 | 0.88 | P     | 42.23   | 0.13 | 0.02 | A     | 5.80   | LOC158402 | 9q32          |
| 1568720_at   | 0.98 | 0.91 | P     | 166.23  | 0.13 | 0.00 | P,M,A | 21.07  | ZNF506    | 19p13.11      |
| 241359_at    | 1.00 | 0.97 | P     | 160.57  | 0.13 | 0.00 | A     | 20.20  |           |               |
| 204199_at    | 0.99 | 0.94 | P     | 118.87  | 0.13 | 0.01 | A     | 15.23  | RALGPS1   | 9q34.13       |
| 236346_at    | 0.99 | 0.94 | P     | 234.60  | 0.13 | 0.00 | A     | 29.70  |           |               |
| 221665_s_at  | 1.00 | 0.99 | P     | 523.77  | 0.13 | 0.00 | A     | 65.83  | EPS8L1    | 19q13.42      |
| 226650_at    | 1.00 | 0.99 | P     | 712.77  | 0.13 | 0.00 | P     | 89.67  | LOC90637  | 7p22.3        |
| 213307_at    | 0.99 | 0.95 | P     | 259.50  | 0.13 | 0.00 | P     | 33.20  | SHANK2    | 11q13.2       |
| 225165_at    | 0.99 | 0.95 | P     | 188.37  | 0.13 | 0.00 | A     | 24.23  | PPP1R1B   | 17q21.2       |
| 233035_at    | 1.00 | 0.96 | P,A   | 31.27   | 0.13 | 0.00 | A     | 3.97   |           |               |
| 203477_at    | 0.98 | 0.91 | P     | 154.70  | 0.13 | 0.00 | A     | 19.93  | COL15A1   | 9q21-q22      |
| 1555935_s_at | 1.00 | 0.99 | P     | 116.77  | 0.13 | 0.01 | A     | 15.17  | HUNK      | 21q22.1       |
| 214133_at    | 1.00 | 0.97 | P     | 62.40   | 0.13 | 0.02 | A     | 8.40   | MUC6      | 11p15.5-p15.4 |
| 231778_at    | 1.00 | 0.96 | P,A   | 117.37  | 0.13 | 0.00 | A     | 15.27  | DLX3      | 17q21         |
| 201709_s_at  | 1.00 | 0.97 | P     | 1497.00 | 0.13 | 0.00 | M,A   | 190.57 | NIPSNAP1  | 22q12.2       |
| 220163_s_at  | 0.95 | 0.85 | P     | 124.50  | 0.13 | 0.01 | P,A   | 16.67  | HR        | 8p21.2        |
| 226368_at    | 1.00 | 0.97 | P     | 174.73  | 0.13 | 0.00 | A     | 22.47  | CHST11    | 12q           |

|              |      |      |     |         |      |      |       |        |           |                |
|--------------|------|------|-----|---------|------|------|-------|--------|-----------|----------------|
| 207980_s_at  | 0.96 | 0.87 | P   | 621.20  | 0.13 | 0.00 | P     | 80.33  | CITED2    | 6q23.3         |
| 204656_at    | 1.00 | 0.99 | P   | 390.80  | 0.13 | 0.00 | A     | 50.10  | MCART1    | 9p13.3-p12     |
| 210314_x_at  | 1.00 | 0.99 | P   | 374.77  | 0.13 | 0.01 | P     | 49.83  | TNFSF13   | 17p13.1        |
| 222312_s_at  | 0.99 | 0.94 | P   | 343.60  | 0.13 | 0.00 | A     | 44.23  |           |                |
| 221664_s_at  | 1.00 | 0.97 | P   | 680.13  | 0.13 | 0.00 | A     | 87.97  | F11R      | 1q21.2-q21.3   |
| 1553105_s_at | 0.93 | 0.82 | P,A | 153.67  | 0.13 | 0.02 | A     | 21.63  | DSG2      | 18q12.1        |
| 226145_s_at  | 1.00 | 0.96 | P   | 160.10  | 0.13 | 0.00 | P,M,A | 20.73  | FRAS1     | 4q21.21        |
| 1552546_a_at | 0.98 | 0.90 | P   | 137.93  | 0.13 | 0.01 | A     | 18.67  | FLJ25409  | 8p11.22        |
| 218373_at    | 1.00 | 0.96 | P   | 837.83  | 0.13 | 0.01 | P     | 111.80 | FTS       | 16q12.2        |
| 242903_at    | 1.00 | 0.97 | P   | 167.63  | 0.13 | 0.01 | P,A   | 22.30  | IFNGR1    | 6q23-q24       |
| 209125_at    | 0.98 | 0.90 | P   | 113.83  | 0.13 | 0.00 | A     | 15.03  | KRT6A     | 12q12-q13      |
| 218844_at    | 1.00 | 0.96 | P,M | 131.70  | 0.13 | 0.01 | A     | 17.87  | FLJ20920  | 17q21.33       |
| 219308_s_at  | 1.00 | 0.95 | P   | 193.20  | 0.13 | 0.00 | A     | 25.67  | AK5       | 1p31           |
| 205455_at    | 1.00 | 0.97 | P   | 237.33  | 0.13 | 0.00 | P,A   | 31.67  | MST1R     | 3p21.3         |
| 226187_at    | 0.98 | 0.91 | P,M | 235.13  | 0.13 | 0.01 | A     | 32.10  | CDS1      | 4q21.23        |
| 33322_i_at   | 1.00 | 0.97 | P   | 4120.80 | 0.13 | 0.00 | P     | 544.97 | SFN       | 1p35.3         |
| 203323_at    | 0.99 | 0.92 | P   | 1753.70 | 0.13 | 0.00 | P     | 233.97 | CAV2      | 7q31.1         |
| 223471_at    | 1.00 | 0.96 | P   | 322.00  | 0.14 | 0.01 | P     | 43.90  | RAB3IP    | 12q14.3        |
| 221698_s_at  | 0.95 | 0.84 | P   | 108.83  | 0.14 | 0.02 | A     | 16.00  | CLECSF12  | 12p13.2-p12.3  |
| 203108_at    | 1.00 | 0.96 | P   | 717.07  | 0.14 | 0.00 | A     | 95.73  | RAI3      | 12p13-p12.3    |
| 243410_at    | 0.99 | 0.93 | P   | 83.30   | 0.14 | 0.01 | A     | 11.47  |           |                |
| 205194_at    | 1.00 | 0.99 | P   | 2194.50 | 0.14 | 0.00 | P     | 294.20 | PSPH      | 7p15.2-p15.1   |
| 212769_at    | 0.99 | 0.92 | P   | 312.97  | 0.14 | 0.00 | P,A   | 41.87  | TLE3      | 15q22          |
| 1569107_s_at | 0.99 | 0.95 | P   | 91.70   | 0.14 | 0.02 | A     | 13.00  | FLJ16030  | 1p34.2         |
| 206472_s_at  | 1.00 | 0.98 | P   | 531.63  | 0.14 | 0.00 | P     | 72.27  | TLE3      | 15q22          |
| 227985_at    | 1.00 | 0.96 | P   | 223.57  | 0.14 | 0.00 | A     | 30.80  |           |                |
| 235515_at    | 0.99 | 0.93 | P   | 307.03  | 0.14 | 0.01 | A     | 43.47  | FLJ36445  | 19q13.13       |
| 220959_s_at  | 1.00 | 0.95 | P   | 85.67   | 0.14 | 0.02 | A     | 12.37  | OBP2A     | 9q34           |
| 226275_at    | 1.00 | 0.97 | P   | 404.73  | 0.14 | 0.00 | P,M,A | 54.97  | MAD       | 2p13-p12       |
| 203498_at    | 0.98 | 0.90 | P   | 186.07  | 0.14 | 0.00 | P     | 25.33  | DSCR1L1   | 6p21.1         |
| 204647_at    | 1.00 | 0.97 | P   | 2333.70 | 0.14 | 0.00 | P     | 315.70 | HOMER3    | 19p13.11       |
| 235121_at    | 0.99 | 0.92 | P   | 237.13  | 0.14 | 0.00 | P     | 32.83  | ZNF542    | 19q13.43       |
| 235247_at    | 1.00 | 0.97 | P   | 152.73  | 0.14 | 0.00 | A     | 20.87  |           |                |
| 224694_at    | 0.99 | 0.94 | P   | 440.97  | 0.14 | 0.00 | P     | 60.77  | ANTXR1    | 2p13.1         |
| 207394_at    | 1.00 | 0.96 | P   | 109.80  | 0.14 | 0.01 | A     | 15.77  | ZNF137    | 19q13.4        |
| 212647_at    | 0.98 | 0.91 | P,A | 84.33   | 0.14 | 0.00 | A     | 11.60  | RRAS      | 19q13.3-qter   |
| 201289_at    | 1.00 | 0.97 | P   | 2212.00 | 0.14 | 0.00 | P     | 301.53 | CYR61     | 1p31-p22       |
| 202510_s_at  | 1.00 | 0.96 | P   | 424.43  | 0.14 | 0.00 | M,A   | 57.90  | TNFAIP2   | 14q32          |
| 210764_s_at  | 0.97 | 0.88 | P   | 876.13  | 0.14 | 0.00 | A     | 121.97 | CYR61     | 1p31-p22       |
| 205749_at    | 0.98 | 0.90 | P   | 194.87  | 0.14 | 0.02 | A     | 28.40  | CYP1A1    | 15q22-q24      |
| 205640_at    | 0.99 | 0.93 | P,A | 51.90   | 0.14 | 0.01 | A     | 7.37   | ALDH3B1   | 11q13          |
| 217066_s_at  | 0.98 | 0.89 | P,A | 75.47   | 0.14 | 0.01 | A     | 10.77  | DMPK      | 19q13.3        |
| 204985_s_at  | 0.99 | 0.95 | P   | 230.37  | 0.14 | 0.00 | A     | 31.80  | MGC2650   | 19q13.32       |
| 230273_at    | 0.94 | 0.84 | P,A | 31.43   | 0.14 | 0.02 | A     | 4.70   | C6orf165  | 6q15           |
| 224837_at    | 0.99 | 0.91 | P   | 429.23  | 0.14 | 0.00 | P,A   | 59.37  | FOXP1     | 3p14.1         |
| 230766_at    | 1.00 | 0.97 | P   | 230.57  | 0.14 | 0.01 | P     | 33.27  |           |                |
| 206094_x_at  | 1.00 | 0.97 | P,M | 332.37  | 0.14 | 0.00 | P,A   | 46.97  | UGT1A6    | 2q37           |
| 202035_s_at  | 0.99 | 0.94 | P   | 79.97   | 0.14 | 0.01 | P,A   | 11.47  | SFRP1     | 8p12-p11.1     |
| 238168_at    | 0.98 | 0.90 | P   | 54.83   | 0.14 | 0.03 | A     | 8.43   | TM4SF1    | 3q21-q25       |
| 1554640_at   | 0.98 | 0.89 | P   | 82.10   | 0.14 | 0.02 | A     | 12.20  | PALM2     | 9q31-q33       |
| 215532_x_at  | 0.99 | 0.94 | P   | 70.20   | 0.14 | 0.00 | P,M   | 10.03  | ZNF492    | 19p13.11       |
| 1556212_x_at | 0.99 | 0.92 | P   | 38.93   | 0.14 | 0.01 | A     | 5.60   |           |                |
| 242417_at    | 1.00 | 0.95 | P   | 243.07  | 0.14 | 0.00 | A     | 34.47  | LOC283278 | 11p15.2        |
| 203027_s_at  | 0.99 | 0.94 | P   | 238.93  | 0.14 | 0.00 | P,A   | 34.03  | MVD       | 16q24.3        |
| 232353_s_at  | 0.98 | 0.90 | P   | 630.40  | 0.14 | 0.01 | M,A   | 92.73  | MK-STYX   | 7q11.23        |
| 226285_at    | 0.99 | 0.94 | P   | 793.80  | 0.14 | 0.00 | P     | 111.50 | M11S1     | 11p13          |
| 204341_at    | 0.99 | 0.93 | P   | 608.50  | 0.14 | 0.00 | A     | 85.33  | TRIM16    | 17p11.2        |
| 210986_s_at  | 1.00 | 0.99 | P   | 4539.73 | 0.14 | 0.00 | P     | 634.17 | TPM1      | 15q22.1        |
| 214721_x_at  | 1.00 | 0.99 | P   | 772.53  | 0.14 | 0.00 | P     | 109.13 | CDC42EP4  | 17q24-q25      |
| 206561_s_at  | 1.00 | 0.97 | P   | 355.63  | 0.14 | 0.00 | A     | 50.20  | AKR1B10   | 7q33           |
| 201466_s_at  | 0.99 | 0.91 | P   | 231.87  | 0.14 | 0.00 | P     | 32.57  | JUN       | 1p32-p31       |
| 206346_at    | 0.99 | 0.92 | P   | 48.87   | 0.14 | 0.02 | P,A   | 7.40   | PRLR      | 5p14-p13       |
| 40837_at     | 0.99 | 0.94 | P   | 535.20  | 0.14 | 0.02 | A     | 79.53  | TLE2      | 19p13.3        |
| 243885_x_at  | 0.98 | 0.90 | P   | 45.60   | 0.14 | 0.00 | P,A   | 6.37   | EFG1      | 3q25.1-q26.2   |
| 216061_x_at  | 0.98 | 0.91 | P   | 260.13  | 0.14 | 0.01 | M,A   | 38.37  | PDGFB     | 22q13.1        |
| 1552319_a_at | 0.95 | 0.85 | P   | 57.87   | 0.14 | 0.01 | A     | 8.40   | KLK8      | 19q13.3-q13.4  |
| 204681_s_at  | 0.99 | 0.94 | P   | 188.37  | 0.14 | 0.00 | P,A   | 26.87  | RAPGEF5   | 7p15.3         |
| 219749_at    | 1.00 | 0.97 | P   | 232.67  | 0.14 | 0.01 | A     | 33.30  | SH2D4A    | 8p21.2         |
| 227052_at    | 1.00 | 0.99 | P   | 580.83  | 0.14 | 0.00 | P     | 82.47  |           |                |
| 35147_at     | 0.98 | 0.90 | P   | 657.67  | 0.14 | 0.01 | A     | 94.07  | MCF2L     | 13q34          |
| 228596_at    | 0.98 | 0.91 | P   | 267.43  | 0.14 | 0.00 | A     | 37.77  | ARHGEF5   | 7q33-q35       |
| 218982_s_at  | 1.00 | 0.99 | P   | 3768.53 | 0.14 | 0.00 | P     | 533.10 | MRPS17    | 7p11           |
| 31845_at     | 1.00 | 0.95 | P   | 482.10  | 0.14 | 0.00 | P     | 68.43  | ELF4      | xq26           |
| 244780_at    | 0.99 | 0.94 | P   | 90.57   | 0.14 | 0.02 | A     | 14.03  | SGPP2     | 2q36.1         |
| 207847_s_at  | 0.99 | 0.92 | P   | 638.27  | 0.14 | 0.01 | P,M,A | 94.07  | MUC1      | 1q21           |
| 229801_at    | 1.00 | 0.98 | P   | 296.83  | 0.14 | 0.01 | A     | 42.73  | C10orf47  | 10p14          |
| 221794_at    | 1.00 | 0.97 | P   | 233.40  | 0.14 | 0.00 | A     | 33.47  | DOCK6     | 19p13.2        |
| 235957_at    | 0.99 | 0.94 | P   | 71.53   | 0.14 | 0.02 | A     | 10.77  |           |                |
| 216268_s_at  | 1.00 | 0.97 | P   | 433.97  | 0.15 | 0.00 | P     | 62.03  | JAG1      | 20p12.1-p11.23 |
| 205289_at    | 0.97 | 0.89 | P   | 106.90  | 0.15 | 0.00 | A     | 15.37  | BMP2      | 20p12          |
| 219501_at    | 0.99 | 0.95 | P   | 140.33  | 0.15 | 0.01 | A     | 20.50  | FLJ10094  | 13q14.11       |
| 214807_at    | 1.00 | 0.96 | P   | 106.47  | 0.15 | 0.00 | A     | 15.43  |           |                |
| 213780_at    | 0.99 | 0.94 | P   | 82.67   | 0.15 | 0.01 | A     | 12.50  |           |                |
| 235953_at    | 1.00 | 0.95 | P   | 116.67  | 0.15 | 0.02 | P,M,A | 18.23  | ZNF610    | 19q13.41       |
| 228496_s_at  | 0.98 | 0.89 | P   | 706.23  | 0.15 | 0.00 | P     | 102.33 | CRIM1     | 2p21           |
| 201668_x_at  | 0.95 | 0.85 | P   | 824.30  | 0.15 | 0.00 | P     | 119.47 | MARCKS    | 6q22.2         |
| 218128_at    | 0.99 | 0.95 | P   | 418.70  | 0.15 | 0.00 | P     | 60.83  | NFYB      | 12q22-q23      |
| 237489_at    | 1.00 | 0.99 | P   | 35.10   | 0.15 | 0.01 | A     | 5.27   |           |                |
| 226425_at    | 1.00 | 0.95 | P   | 148.23  | 0.15 | 0.01 | A     | 22.07  | FLJ21069  | 2p23.3         |
| 208711_s_at  | 1.00 | 0.98 | P   | 962.20  | 0.15 | 0.00 | P     | 139.20 | CCND1     | 11q13          |
| 214912_at    | 0.98 | 0.89 | P   | 67.77   | 0.15 | 0.02 | A     | 10.63  |           |                |
| 212327_at    | 0.98 | 0.91 | P   | 632.00  | 0.15 | 0.00 | P     | 92.27  | KIAA1102  | 4p14           |
| 242045_at    | 1.00 | 0.96 | P   | 88.80   | 0.15 | 0.01 | A     | 13.40  | LOC348840 | 3q29           |
| 221614_s_at  | 1.00 | 0.97 | P   | 145.17  | 0.15 | 0.00 | P     | 21.07  | RPH3AL    | 17p13.3        |
| 202704_at    | 1.00 | 0.97 | P   | 1944.90 | 0.15 | 0.00 | P     | 284.50 | TOB1      | 17q21          |
| 233687_s_at  | 1.00 | 0.97 | P   | 103.83  | 0.15 | 0.01 | A     | 15.30  | KLK9      | 19q13.41       |

|              |      |      |       |         |      |      |       |        |              |                |
|--------------|------|------|-------|---------|------|------|-------|--------|--------------|----------------|
| 1553684_at   | 0.99 | 0.92 | P     | 69.00   | 0.15 | 0.00 | A     | 10.20  | PPIL6        | 6q21           |
| 223665_at    | 1.00 | 0.98 | P     | 44.70   | 0.15 | 0.01 | A     | 6.70   | ARPM1        | 3q26.31        |
| 228975_at    | 0.99 | 0.93 | P     | 288.33  | 0.15 | 0.01 | PA    | 44.27  | SP6          | 17q21.32       |
| 1560792_at   | 1.00 | 0.95 | P     | 164.03  | 0.15 | 0.00 | PA    | 24.40  | IER5         | 1q25.1         |
| 205743_at    | 1.00 | 0.97 | P     | 531.27  | 0.15 | 0.00 | A     | 78.27  | STAC         | 3p22.3         |
| 225406_at    | 0.99 | 0.94 | P     | 1311.47 | 0.15 | 0.00 | P     | 193.60 | TWSG1        | 18p11.3        |
| 200878_at    | 0.99 | 0.93 | P     | 899.97  | 0.15 | 0.00 | P     | 131.93 | EPAS1        | 2p21-p16       |
| 206029_at    | 0.99 | 0.92 | P,M,A | 45.90   | 0.15 | 0.02 | A     | 7.17   | ANKRD1       | 10q23.33       |
| 1563022_at   | 0.99 | 0.92 | P     | 101.30  | 0.15 | 0.00 | A     | 15.27  |              | Xq26.3         |
| 217080_s_at  | 0.99 | 0.93 | P     | 156.33  | 0.15 | 0.00 | A     | 23.43  | HOMER2       | 15q24.3        |
| 227417_at    | 1.00 | 0.96 | P     | 207.97  | 0.15 | 0.00 | A     | 31.43  | FLJ20605     | 1q42.11        |
| 225897_at    | 0.99 | 0.93 | P     | 1566.27 | 0.15 | 0.00 | P     | 232.47 | MARCKS       | 6q22.2         |
| 226875_at    | 1.00 | 0.95 | P     | 125.23  | 0.15 | 0.01 | A     | 19.33  | DOCK11       | xq24           |
| 239231_at    | 1.00 | 0.99 | P     | 758.77  | 0.15 | 0.00 | P     | 112.37 |              |                |
| 226176_s_at  | 1.00 | 0.97 | P     | 182.30  | 0.15 | 0.00 | PA    | 27.10  | USP42        | 7p22.2         |
| 219615_s_at  | 0.98 | 0.91 | P     | 181.30  | 0.15 | 0.00 | PA    | 27.20  | KCNK5        | 6p21           |
| 218303_x_at  | 1.00 | 0.98 | P     | 1103.70 | 0.15 | 0.00 | P,M   | 164.33 | LOC51315     | 2p11.2         |
| 219765_at    | 1.00 | 0.97 | P     | 338.80  | 0.15 | 0.00 | PA    | 51.03  | FLJ12586     | 19q13.43       |
| 203149_at    | 1.00 | 0.96 | P     | 452.87  | 0.15 | 0.00 | A     | 67.93  | PVRL2        | 19q13.2-q13.4  |
| 210136_at    | 0.98 | 0.89 | P     | 346.97  | 0.15 | 0.00 | PA    | 52.27  |              | 18q23          |
| 210096_at    | 1.00 | 0.97 | P     | 101.20  | 0.15 | 0.00 | A     | 15.40  | CYP4B1       | 1p34-p12       |
| 228640_at    | 0.99 | 0.93 | P     | 57.43   | 0.15 | 0.02 | A     | 9.27   | PCDH7        | 4p15           |
| 229145_at    | 1.00 | 0.98 | P     | 764.87  | 0.15 | 0.00 | P     | 115.43 | C10orf104    | 10q22.2        |
| 226799_at    | 0.98 | 0.92 | P,A   | 81.70   | 0.15 | 0.01 | A     | 12.70  | FGD6         | 12q23.1        |
| 212328_at    | 1.00 | 0.95 | P     | 420.10  | 0.15 | 0.00 | P     | 63.83  | KIAA1102     | 4p14           |
| 220387_s_at  | 1.00 | 0.99 | P     | 203.30  | 0.15 | 0.00 | A     | 30.83  | HHLA3        | 1p31.2         |
| 220291_s_at  | 0.99 | 0.94 | P     | 4768.87 | 0.15 | 0.00 | P     | 726.63 | MGP          | 12p13.1-p12.3  |
| 232244_at    | 1.00 | 0.96 | P     | 192.30  | 0.15 | 0.01 | PA    | 30.20  | KIAA1161     | 9p13.2         |
| 1554741_s_at | 0.98 | 0.91 | P     | 152.37  | 0.15 | 0.00 | P     | 23.43  | FLJ30435     | 9q21.12        |
| 201670_s_at  | 0.99 | 0.94 | P     | 2029.40 | 0.15 | 0.00 | P     | 308.83 | MARCKS       | 6q22.2         |
| 225207_at    | 0.98 | 0.89 | P     | 55.33   | 0.15 | 0.01 | A     | 8.73   | PKD4         | 7q21.3-q22.1   |
| 215489_x_at  | 0.99 | 0.92 | P     | 1168.83 | 0.15 | 0.00 | P     | 178.47 | HOMER3       | 19p13.11       |
| 219010_at    | 0.99 | 0.94 | P     | 640.10  | 0.15 | 0.00 | A     | 99.57  | FLJ10901     | 1q32.1         |
| 203717_at    | 0.97 | 0.88 | P     | 153.07  | 0.15 | 0.01 | A     | 24.00  | DPP4         | 2q24.3         |
| 241895_at    | 0.97 | 0.87 | P,A   | 17.67   | 0.15 | 0.01 | A     | 2.83   |              | 2q21.2         |
| 238702_at    | 1.00 | 0.95 | P     | 76.27   | 0.15 | 0.00 | PA    | 11.80  | ADMP         | 3q26.1         |
| 219280_at    | 0.99 | 0.94 | P     | 153.43  | 0.15 | 0.02 | M,A   | 24.63  | C21orf107    | 21q22.2        |
| 239995_at    | 1.00 | 0.97 | P     | 213.17  | 0.15 | 0.00 | P,M,A | 32.70  |              | 19q13.13       |
| 229240_at    | 1.00 | 0.96 | P     | 180.77  | 0.15 | 0.01 | P     | 28.37  | ZDHHC21      | 9p22.3         |
| 1559072_a_at | 1.00 | 0.97 | P     | 228.23  | 0.16 | 0.01 | A     | 36.00  | KIAA1904     | 22q13.1        |
| 231836_at    | 0.99 | 0.93 | P     | 277.97  | 0.16 | 0.01 | P     | 44.63  | HKR1         | 19q13.13       |
| 215146_s_at  | 0.99 | 0.93 | P     | 42.23   | 0.16 | 0.02 | M,A   | 6.97   | KIAA1043     | 22q12.1        |
| 221088_s_at  | 1.00 | 0.98 | P     | 90.23   | 0.16 | 0.00 | A     | 13.93  | PPP1R9A      | 7q21.3         |
| 235736_at    | 0.99 | 0.95 | P     | 127.30  | 0.16 | 0.01 | PA    | 19.90  |              |                |
| 228726_at    | 0.99 | 0.92 | P     | 497.07  | 0.16 | 0.00 | P,M   | 76.57  | SERPINB1     | 6p25           |
| 205246_at    | 0.99 | 0.92 | P     | 304.00  | 0.16 | 0.00 | PA    | 47.17  | PEX13        | 2p14-p16       |
| 241247_at    | 1.00 | 0.95 | P     | 106.03  | 0.16 | 0.00 | A     | 16.40  |              | 3q25.1         |
| 242907_at    | 0.99 | 0.95 | P     | 176.07  | 0.16 | 0.00 | P     | 27.53  | GBP2         | 1p22.2         |
| 238315_s_at  | 0.98 | 0.91 | P     | 65.50   | 0.16 | 0.02 | A     | 11.07  | ZNF567       | 19q13.13       |
| 238952_x_at  | 1.00 | 0.96 | P     | 88.23   | 0.16 | 0.01 | PA    | 14.10  | DKFZp7790175 | 19q13.13       |
| 1562484_at   | 1.00 | 0.97 | P     | 45.37   | 0.16 | 0.02 | A     | 7.47   | FLJ35848     | 17q21.31       |
| 221016_s_at  | 1.00 | 0.99 | P     | 318.50  | 0.16 | 0.00 | M,A   | 50.40  | TCF7L1       | 2p11.2         |
| 232151_at    | 0.97 | 0.88 | P     | 107.40  | 0.16 | 0.00 | A     | 17.00  |              |                |
| 208228_s_at  | 0.99 | 0.93 | P     | 129.47  | 0.16 | 0.01 | A     | 20.70  | FGFR2        | 10q26          |
| 242245_at    | 1.00 | 0.99 | P     | 299.70  | 0.16 | 0.00 | P     | 46.90  |              |                |
| 219976_at    | 0.99 | 0.93 | P     | 53.50   | 0.16 | 0.01 | A     | 8.50   | HOOK1        | 1p32.1         |
| 215506_s_at  | 0.98 | 0.89 | P     | 103.20  | 0.16 | 0.02 | PA    | 17.27  | ARHI         | 1p31           |
| 229310_at    | 1.00 | 0.99 | P     | 150.83  | 0.16 | 0.01 | A     | 24.57  | KBTD9        | 2p24.1         |
| 210239_at    | 0.97 | 0.88 | P     | 594.43  | 0.16 | 0.00 | P     | 94.20  | IRX5         | 16q11.2-q13    |
| 1559020_a_at | 0.99 | 0.94 | P     | 23.60   | 0.16 | 0.02 | A     | 4.00   |              |                |
| 214240_at    | 0.99 | 0.93 | P     | 145.17  | 0.16 | 0.01 | A     | 23.60  | GAL          | 11q13.1        |
| 221824_s_at  | 1.00 | 0.96 | P     | 178.27  | 0.16 | 0.00 | A     | 28.17  | MIR          | 10q11.22       |
| 224989_at    | 0.99 | 0.93 | P     | 394.07  | 0.16 | 0.01 | P     | 62.93  |              |                |
| 214958_s_at  | 0.97 | 0.89 | P     | 361.83  | 0.16 | 0.00 | A     | 57.93  | EVER1        | 17q25.3        |
| 204928_s_at  | 1.00 | 0.95 | P     | 970.70  | 0.16 | 0.00 | P     | 154.67 | SLC10A3      | xq28           |
| 210220_at    | 0.98 | 0.90 | P     | 200.10  | 0.16 | 0.01 | A     | 32.40  | FZD2         | 17q21.1        |
| 226550_at    | 0.99 | 0.93 | P     | 279.10  | 0.16 | 0.00 | P     | 44.30  |              |                |
| 221841_s_at  | 0.99 | 0.94 | P     | 255.30  | 0.16 | 0.00 | PA    | 41.50  | KLF4         | 9q31           |
| 224990_at    | 1.00 | 0.95 | P     | 876.93  | 0.16 | 0.00 | P     | 140.67 | LOC201895    | 4p14           |
| 227077_at    | 1.00 | 0.99 | P     | 523.27  | 0.16 | 0.00 | PA    | 83.50  | ZNF286       | 17p11.2        |
| 226297_at    | 1.00 | 0.97 | P     | 2889.33 | 0.16 | 0.00 | P     | 461.80 | HIPK3        | 11p13          |
| 238937_at    | 0.98 | 0.89 | P     | 107.17  | 0.16 | 0.02 | PA    | 18.20  | FLJ32191     | 19q13.13       |
| 241355_at    | 0.99 | 0.93 | P     | 640.63  | 0.16 | 0.00 | A     | 102.50 | HR           | 8p21.2         |
| 201556_s_at  | 0.98 | 0.90 | P     | 291.13  | 0.16 | 0.00 | P     | 46.47  | VAMP2        | 17p13.1        |
| 225224_at    | 0.99 | 0.93 | P     | 209.40  | 0.16 | 0.00 | A     | 34.43  | C20orf112    | 20q11.1-q11.23 |
| 204589_at    | 0.99 | 0.92 | P     | 165.70  | 0.16 | 0.00 | PA    | 26.77  | ARK5         | 12q24.11       |
| 235275_at    | 1.00 | 0.96 | P     | 113.30  | 0.16 | 0.01 | A     | 19.03  | BMP8B        | 1p35-p32       |
| 227944_at    | 1.00 | 0.97 | P     | 100.53  | 0.16 | 0.01 | M,A   | 16.63  |              |                |
| 217967_s_at  | 1.00 | 0.98 | P     | 185.47  | 0.16 | 0.01 | PA    | 30.83  | C1orf24      | 1q25           |
| 233273_at    | 0.98 | 0.91 | P     | 66.60   | 0.16 | 0.02 | PA    | 11.70  |              |                |
| 201693_s_at  | 0.99 | 0.92 | P     | 390.13  | 0.16 | 0.00 | A     | 63.60  | EGR1         | 5q31.1         |
| 205020_s_at  | 1.00 | 0.99 | P     | 554.50  | 0.16 | 0.00 | PA    | 89.57  | ARL4A        | 7p21-p15.3     |
| 1560556_a_at | 1.00 | 0.97 | P     | 79.83   | 0.16 | 0.00 | PA    | 13.10  |              |                |
| 1568854_at   | 1.00 | 0.96 | P     | 68.40   | 0.16 | 0.00 | A     | 11.30  |              |                |
| 208789_at    | 1.00 | 0.98 | P,M   | 842.63  | 0.16 | 0.00 | A     | 136.63 | PTRF         | 17q21.31       |
| 214927_at    | 0.98 | 0.91 | P     | 210.93  | 0.16 | 0.00 | A     | 34.50  | ITGBL1       | 13q33          |
| 218849_s_at  | 1.00 | 0.98 | P     | 724.57  | 0.16 | 0.00 | A     | 117.50 | RAI          | 19q13.32       |
| 218693_at    | 0.97 | 0.89 | P     | 241.00  | 0.17 | 0.01 | P     | 40.47  | NET-7        | 10q22.1        |
| 201906_s_at  | 1.00 | 0.98 | P     | 940.17  | 0.17 | 0.00 | P     | 153.00 | CTDSP1       | 3p21.3         |
| 232977_x_at  | 0.98 | 0.90 | P,M   | 328.27  | 0.17 | 0.01 | A     | 55.63  | MYH14        | 19q13.33       |
| 1555310_a_at | 1.00 | 0.96 | P     | 336.20  | 0.17 | 0.00 | A     | 55.20  | PAK6         | 15q14          |
| 204284_at    | 1.00 | 0.97 | P     | 264.07  | 0.17 | 0.00 | A     | 43.60  | PPP1R3C      | 10q23-q24      |
| 208937_s_at  | 1.00 | 0.96 | P     | 769.27  | 0.17 | 0.00 | P     | 127.27 | ID1          | 20q11          |
| 209502_s_at  | 0.98 | 0.90 | P     | 176.43  | 0.17 | 0.02 | A     | 30.67  | BAIAP2       | 17q25          |
| 212770_at    | 0.99 | 0.95 | P,M   | 423.77  | 0.17 | 0.00 | A     | 69.90  | TLE3         | 15q22          |
| 232567_at    | 0.99 | 0.93 | P,M   | 156.37  | 0.17 | 0.01 | A     | 27.07  | ARHGAP8      | 22q13.31       |

|              |      |      |     |         |      |      |       |        |               |              |
|--------------|------|------|-----|---------|------|------|-------|--------|---------------|--------------|
| 216488_s_at  | 0.92 | 0.81 | P,A | 94.47   | 0.17 | 0.01 | A     | 16.20  | ATP11A        | 13q34        |
| 205793_x_at  | 0.94 | 0.83 | P,A | 242.40  | 0.17 | 0.02 | A     | 42.03  | TNK1          | 17p13.1      |
| 208712_at    | 1.00 | 0.98 | P   | 1011.47 | 0.17 | 0.00 | P     | 169.50 | CCND1         | 11q13        |
| 222065_s_at  | 0.97 | 0.87 | P   | 860.40  | 0.17 | 0.01 | P     | 144.63 | FLII          | 17p11.2      |
| 228619_x_at  | 1.00 | 0.95 | P   | 702.40  | 0.17 | 0.00 | P     | 116.33 | MGC3794       | 1q23.2       |
| 226736_at    | 1.00 | 0.98 | P   | 701.33  | 0.17 | 0.01 | A     | 117.93 | C14orf52      | 14q23.3      |
| 227284_at    | 1.00 | 0.98 | P   | 379.03  | 0.17 | 0.00 | P     | 62.93  | LOC90321      | 19q13.41     |
| 209191_at    | 1.00 | 0.95 | P   | 1638.97 | 0.17 | 0.00 | P     | 273.73 | MGC4083       | 18p11.21     |
| 212056_at    | 1.00 | 0.96 | P   | 505.57  | 0.17 | 0.00 | A     | 84.17  | KIAA0182      | 16q24.1      |
| 244640_at    | 1.00 | 0.98 | P   | 215.77  | 0.17 | 0.01 | P,A   | 36.47  |               |              |
| 218175_at    | 0.99 | 0.94 | P,A | 545.10  | 0.17 | 0.00 | A     | 91.03  | FLJ22471      | 12q24.31     |
| 213340_s_at  | 1.00 | 0.98 | P   | 186.17  | 0.17 | 0.01 | P,M,A | 31.77  | KIAA0495      | 1p36.32      |
| 232060_at    | 1.00 | 0.99 | P   | 187.33  | 0.17 | 0.00 | P     | 31.37  |               |              |
| 201694_s_at  | 0.99 | 0.93 | P   | 1126.90 | 0.17 | 0.00 | P     | 187.67 | EGR1          | 5q31.1       |
| 206170_at    | 1.00 | 0.97 | P   | 267.47  | 0.17 | 0.01 | A     | 46.13  | ADRB2         | 5q31-q32     |
| 204717_s_at  | 0.99 | 0.93 | P   | 274.10  | 0.17 | 0.01 | A     | 46.90  | SLC29A2       | 11q13        |
| 228772_at    | 1.00 | 0.98 | P   | 80.93   | 0.17 | 0.01 | P,A   | 14.20  | HNMT          | 2q22.1       |
| 222354_at    | 1.00 | 0.97 | P   | 81.63   | 0.17 | 0.00 | A     | 13.80  | F11R          | 1q21.2-q21.3 |
| 216594_x_at  | 0.99 | 0.95 | P   | 415.97  | 0.17 | 0.00 | P     | 71.20  | AKR1C1        | 10p15-p14    |
| 1560296_at   | 0.97 | 0.88 | P   | 452.73  | 0.17 | 0.00 | P     | 76.00  |               |              |
| 241356_at    | 0.97 | 0.88 | P   | 89.07   | 0.17 | 0.01 | A     | 15.57  |               |              |
| 201601_x_at  | 1.00 | 0.98 | P   | 293.40  | 0.17 | 0.00 | A     | 49.80  | IFITM1        | 11p15.5      |
| 223434_at    | 1.00 | 0.99 | P   | 315.20  | 0.17 | 0.00 | P     | 53.33  | GBP3          | 1p22.2       |
| 214319_at    | 0.99 | 0.93 | P   | 83.33   | 0.17 | 0.02 | A     | 15.43  | 13CDNA73      | 13q12.3      |
| 1568658_at   | 1.00 | 0.99 | P   | 406.47  | 0.17 | 0.00 | P     | 69.13  |               | 2p16.1       |
| 223103_at    | 1.00 | 0.97 | P   | 1660.93 | 0.17 | 0.00 | P     | 281.40 | STARD10       | 11q13        |
| 1559026_at   | 1.00 | 0.95 | P   | 46.43   | 0.17 | 0.01 | A     | 8.17   |               |              |
| 1566901_at   | 1.00 | 0.98 | P   | 371.37  | 0.17 | 0.00 | P     | 63.33  |               |              |
| 218284_at    | 0.99 | 0.94 | P   | 290.87  | 0.17 | 0.01 | A     | 51.10  | DKFZP586N0721 | 15q22.31     |
| 223581_at    | 1.00 | 0.97 | P,A | 71.37   | 0.17 | 0.00 | A     | 12.17  | ZNF577        | 19q13.41     |
| 204663_at    | 1.00 | 0.95 | P   | 213.17  | 0.17 | 0.00 | A     | 36.73  | ME3           | 11cen-q22.3  |
| 211725_s_at  | 1.00 | 0.97 | P   | 1016.10 | 0.17 | 0.00 | P     | 173.80 | BID           | 22q11.1      |
| 227045_at    | 1.00 | 0.96 | P   | 294.03  | 0.17 | 0.00 | P,A   | 50.53  | ZNF614        | 19q13.41     |
| 225273_at    | 1.00 | 0.95 | P,A | 229.40  | 0.17 | 0.02 | A     | 41.23  | KIAA1280      | xp22.32      |
| 1566558_x_at | 0.98 | 0.91 | P   | 104.03  | 0.17 | 0.01 | A     | 18.37  |               |              |
| 220407_s_at  | 0.96 | 0.86 | P   | 335.57  | 0.18 | 0.00 | P,A   | 58.50  | TGFB2         | 1q41         |
| 212057_at    | 0.99 | 0.95 | P   | 1255.63 | 0.18 | 0.00 | P     | 217.67 | KIAA0182      | 16q24.1      |
| 225667_s_at  | 1.00 | 0.98 | P   | 152.73  | 0.18 | 0.01 | A     | 27.07  | NSE1          | 2p25.1       |
| 203232_s_at  | 1.00 | 0.97 | P   | 1039.17 | 0.18 | 0.01 | P     | 183.10 | SCA1          | 6p23         |
| 208156_x_at  | 0.98 | 0.91 | P   | 285.07  | 0.18 | 0.01 | A     | 51.60  |               |              |
| 59697_at     | 1.00 | 0.95 | P   | 478.30  | 0.18 | 0.00 | M,A   | 83.37  | RAB15         | 14q23.3      |
| 203359_s_at  | 1.00 | 0.99 | P   | 1370.43 | 0.18 | 0.00 | P     | 237.87 | MYCBP         | 1p33-p32.2   |
| 222859_s_at  | 0.98 | 0.91 | P   | 119.23  | 0.18 | 0.02 | A     | 22.70  | DAPP1         | 4q25-q27     |
| 1553611_s_at | 1.00 | 0.96 | P   | 80.47   | 0.18 | 0.00 | A     | 14.03  | FLJ33790      | 11q13.3      |
| 201826_s_at  | 0.97 | 0.88 | P,M | 195.57  | 0.18 | 0.00 | A     | 33.90  | CGI-49        | 1q44         |
| 202729_s_at  | 1.00 | 0.98 | P   | 276.70  | 0.18 | 0.00 | A     | 48.17  | LTBP1         | 2p22-p21     |
| 228156_at    | 0.99 | 0.93 | P   | 305.67  | 0.18 | 0.00 | P,A   | 53.13  |               |              |
| 227703_s_at  | 1.00 | 0.98 | P   | 199.30  | 0.18 | 0.00 | A     | 34.70  | SYTL4         | xq21.33      |
| 227603_at    | 0.99 | 0.94 | P   | 336.10  | 0.18 | 0.00 | P     | 58.73  |               |              |
| 222904_s_at  | 0.99 | 0.93 | P   | 100.50  | 0.18 | 0.00 | P,A   | 17.97  | TMC5          | 16p13.11     |
| 205330_at    | 0.99 | 0.93 | P   | 105.97  | 0.18 | 0.02 | A     | 19.87  | MN1           | 22q12.1      |
| 227509_x_at  | 1.00 | 0.96 | P   | 155.70  | 0.18 | 0.01 | P,M   | 27.50  |               |              |
| 238752_at    | 0.99 | 0.95 | P,A | 59.00   | 0.18 | 0.00 | A     | 10.33  | MRS2L         | 6p22.3-p22.1 |
| 204106_at    | 1.00 | 0.99 | P   | 702.57  | 0.18 | 0.00 | P     | 123.13 | TESK1         | 9p13         |
| 202743_at    | 1.00 | 0.96 | P   | 879.13  | 0.18 | 0.00 | P     | 154.30 | PIK3R3        | 1p34.1       |
| 1554112_a_at | 1.00 | 0.96 | P   | 78.97   | 0.18 | 0.00 | A     | 14.00  | ULK2          | 17p11.2      |
| 201464_x_at  | 0.97 | 0.87 | P   | 623.37  | 0.18 | 0.00 | A     | 109.13 | JUN           | 1p32-p31     |
| 213052_at    | 1.00 | 0.98 | P   | 700.87  | 0.18 | 0.00 | A     | 123.83 | PRKAR2A       | 3p21.3-p21.2 |
| 211056_s_at  | 0.99 | 0.93 | P   | 616.27  | 0.18 | 0.00 | P     | 109.53 | SRD5A1        | 5p15         |
| 219461_at    | 1.00 | 0.96 | P   | 182.73  | 0.18 | 0.01 | A     | 34.07  | PAK6          | 15q14        |
| 210538_s_at  | 1.00 | 0.98 | P   | 92.83   | 0.18 | 0.00 | P,M   | 16.47  | BIRC3         | 11q22        |
| 203829_at    | 1.00 | 0.98 | P   | 474.43  | 0.18 | 0.00 | M,A   | 84.73  | ELP4          | 11p13        |
| 213478_at    | 0.99 | 0.95 | P,A | 152.70  | 0.18 | 0.01 | A     | 27.50  | KIAA1026      | 1p36.13      |
| 211799_x_at  | 0.99 | 0.94 | P   | 649.87  | 0.18 | 0.01 | P     | 117.60 | HLA-C         | 6p21.3       |
| 1569076_a_at | 0.99 | 0.95 | P   | 111.47  | 0.18 | 0.00 | A     | 19.77  |               | 19q13.41     |
| 208790_s_at  | 0.99 | 0.92 | P   | 118.10  | 0.18 | 0.02 | P,A   | 22.20  | PTRF          | 17q21.31     |
| 219518_s_at  | 0.99 | 0.94 | P   | 185.47  | 0.18 | 0.00 | P     | 33.40  | ELL3          | 15q15.1      |
| 218145_at    | 1.00 | 0.97 | P   | 2859.30 | 0.18 | 0.00 | P     | 511.60 | TRIB3         | 20p13-p12.2  |
| 224435_at    | 1.00 | 0.98 | P   | 1300.87 | 0.18 | 0.00 | P     | 232.20 | C10orf58      | 10q23.1      |
| 222881_at    | 0.99 | 0.94 | P   | 87.60   | 0.18 | 0.00 | A     | 15.80  | HPSE          | 4q21.3       |
| 1557667_at   | 1.00 | 0.97 | P   | 112.87  | 0.18 | 0.00 | P     | 20.27  |               |              |
| 219622_at    | 0.98 | 0.90 | P   | 520.77  | 0.18 | 0.00 | A     | 93.00  | RAB20         | 13q34        |
| 225263_at    | 1.00 | 0.97 | P   | 606.00  | 0.18 | 0.00 | P     | 108.40 | HS6ST1        | 2q21         |
| 224792_at    | 1.00 | 0.97 | P   | 392.10  | 0.18 | 0.00 | P     | 70.77  | TNKS1BP1      | 11q12.1      |
| 212559_at    | 0.99 | 0.93 | P   | 227.73  | 0.18 | 0.00 | P     | 40.83  | PRKAR1B       | 7pter-p22    |
| 201594_s_at  | 1.00 | 0.98 | P   | 2733.47 | 0.18 | 0.00 | P     | 490.90 | PPP4R1        | 18p11.22     |
| 218019_s_at  | 1.00 | 0.98 | P   | 1853.10 | 0.18 | 0.00 | P     | 335.90 | C21orf97      | 21q22.3      |
| 209227_at    | 0.97 | 0.89 | P   | 86.13   | 0.18 | 0.02 | A     | 16.80  | TUSC3         | 8p22         |
| 205420_at    | 1.00 | 0.97 | P   | 350.03  | 0.18 | 0.00 | P     | 63.57  | PEX7          | 6q21-q22.2   |
| 210987_x_at  | 0.99 | 0.92 | P   | 4123.40 | 0.18 | 0.00 | P     | 745.90 | TPM1          | 15q22.1      |
| 223931_s_at  | 0.98 | 0.91 | P   | 144.13  | 0.18 | 0.00 | A     | 26.17  | CHFR          | 12q24.33     |
| 202037_s_at  | 0.99 | 0.95 | P   | 309.63  | 0.18 | 0.00 | A     | 56.53  | SFRP1         | 8p12-p11.1   |
| 225020_at    | 0.99 | 0.95 | P   | 402.60  | 0.18 | 0.01 | A     | 74.13  | DAB2IP        | 9q33.1-q33.3 |
| 203556_at    | 0.98 | 0.90 | P   | 225.47  | 0.18 | 0.01 | P,A   | 41.80  | ZHX2          | 8q24.13      |
| 209451_at    | 1.00 | 0.98 | P   | 902.70  | 0.18 | 0.00 | P     | 164.63 | TANK          | 2q24-q31     |
| 200965_s_at  | 1.00 | 0.97 | P   | 1143.93 | 0.18 | 0.00 | P     | 208.77 | ABLIM1        | 10q25        |
| 215860_at    | 0.99 | 0.92 | P   | 60.93   | 0.19 | 0.00 | A     | 11.17  | SYT12         | 11q13.1      |
| 203139_at    | 0.99 | 0.94 | P   | 258.07  | 0.19 | 0.00 | A     | 47.63  | DAPK1         | 9q34.1       |
| 223383_at    | 1.00 | 0.96 | P   | 671.70  | 0.19 | 0.00 | P,A   | 123.30 | ZNRF1         | 16q22.3      |
| 243209_at    | 1.00 | 0.96 | P,A | 38.43   | 0.19 | 0.02 | A     | 7.37   | KCNQ4         | 1p34         |
| 1559503_a_at | 0.94 | 0.83 | P,A | 7.40    | 0.19 | 0.03 | A     | 1.50   |               | 10q11.21     |
| 234290_x_at  | 0.98 | 0.89 | P   | 469.17  | 0.19 | 0.00 | A     | 86.43  | MYH14         | 19q13.33     |
| 219946_x_at  | 0.99 | 0.92 | P   | 460.63  | 0.19 | 0.02 | A     | 88.40  | MYH14         | 19q13.33     |
| 233550_s_at  | 0.94 | 0.83 | P,A | 128.73  | 0.19 | 0.03 | A     | 26.53  | SLC4A11       | 20p12        |
| 221843_s_at  | 0.99 | 0.92 | P   | 209.17  | 0.19 | 0.00 | A     | 38.50  | KIAA1609      | 16q24.1      |
| 203961_at    | 1.00 | 0.98 | P   | 156.30  | 0.19 | 0.01 | P,A   | 29.70  | NEBL          | 10p12        |

|              |      |      |       |         |      |      |       |        |          |               |
|--------------|------|------|-------|---------|------|------|-------|--------|----------|---------------|
| 226124_at    | 1.00 | 0.99 | P     | 246.60  | 0.19 | 0.00 | P     | 45.40  | ZFP90    | 16q22.1       |
| 243835_at    | 0.98 | 0.90 | P     | 148.37  | 0.19 | 0.01 | P,A   | 27.90  | ZDHHC21  | 9p22.3        |
| 1558942_at   | 1.00 | 0.96 | P     | 488.47  | 0.19 | 0.00 | P     | 89.70  | LOC91661 | 19q13.42      |
| 228482_at    | 0.99 | 0.93 | P,A   | 133.47  | 0.19 | 0.01 | A     | 25.70  | FLJ36674 | 17p11.2       |
| 1554922_at   | 0.98 | 0.91 | P,A   | 8.77    | 0.19 | 0.01 | A     | 1.67   | MGC42493 | 1q42.13       |
| 226745_at    | 0.99 | 0.92 | P     | 212.73  | 0.19 | 0.00 | P     | 39.70  | CYP4V2   | 4q35.1        |
| 206572_x_at  | 0.99 | 0.94 | P     | 309.57  | 0.19 | 0.01 | A     | 58.97  | ZNF85    | 19p13.1-p12   |
| 242722_at    | 0.99 | 0.92 | P,A   | 347.50  | 0.19 | 0.01 | A     | 64.83  | LMO7     | 13q21.33      |
| 215066_at    | 0.98 | 0.91 | P,A   | 85.87   | 0.19 | 0.03 | A     | 17.53  | PTPRF    | 1p34          |
| 230063_at    | 0.99 | 0.94 | P     | 136.03  | 0.19 | 0.01 | A     | 26.00  | ZNF264   | 19q13.4       |
| 241431_at    | 1.00 | 0.97 | P     | 251.23  | 0.19 | 0.00 | M,A   | 46.90  |          |               |
| 204867_at    | 0.99 | 0.94 | P     | 177.60  | 0.19 | 0.00 | P,A   | 33.03  | GCHFR    | 15q15         |
| 204029_at    | 0.99 | 0.95 | P     | 414.73  | 0.19 | 0.00 | P     | 77.70  | CELSR2   | 1p21          |
| 202727_s_at  | 1.00 | 0.96 | P     | 1958.17 | 0.19 | 0.00 | P     | 367.20 | IFNGR1   | 6q23-q24      |
| 220419_s_at  | 1.00 | 0.96 | P     | 707.23  | 0.19 | 0.00 | P     | 132.23 | USP25    | 21q11.2       |
| 229256_at    | 0.99 | 0.94 | P     | 172.33  | 0.19 | 0.00 | P,M,A | 32.73  | PGM2L1   | 11q13.3       |
| 224097_s_at  | 1.00 | 0.95 | P     | 322.50  | 0.19 | 0.00 | P     | 60.87  | F11R     | 1q21.2-q21.3  |
| 217979_at    | 1.00 | 0.96 | P     | 3846.50 | 0.19 | 0.00 | P     | 722.43 | TM4SF13  | 7p21.2        |
| 216550_x_at  | 1.00 | 0.96 | P     | 360.43  | 0.19 | 0.01 | P     | 69.23  | ANKRD12  | 18p11.22      |
| 237439_at    | 0.98 | 0.90 | P     | 101.90  | 0.19 | 0.00 | M,A   | 19.03  | USP43    | 17p13.1       |
| 210761_s_at  | 0.99 | 0.94 | P,A   | 191.17  | 0.19 | 0.00 | A     | 36.17  | GRB7     | 17q21.2       |
| 228549_at    | 1.00 | 0.96 | P     | 115.53  | 0.19 | 0.01 | P,A   | 22.20  | KIAA0792 | 1q42.13       |
| 204446_s_at  | 1.00 | 0.97 | P     | 72.23   | 0.19 | 0.01 | A     | 14.20  | ALOX5    | 10q11.2       |
| 227038_at    | 1.00 | 0.96 | P     | 287.03  | 0.19 | 0.00 | P     | 54.50  | MGC26963 | 4q25          |
| 231697_s_at  | 0.99 | 0.92 | P     | 142.13  | 0.19 | 0.01 | P,A   | 27.37  | VMP1     | 17q23.2       |
| 223468_s_at  | 0.96 | 0.87 | P     | 357.87  | 0.19 | 0.00 | P,M,A | 67.73  | RGMA     | 15q26.1       |
| 219255_x_at  | 1.00 | 0.99 | P,M   | 130.40  | 0.19 | 0.02 | A     | 26.07  | IL17RB   | 3p21.1        |
| 243327_at    | 0.99 | 0.92 | P     | 93.77   | 0.19 | 0.02 | A     | 18.93  |          |               |
| 230394_at    | 0.98 | 0.91 | P,M   | 38.27   | 0.19 | 0.02 | A     | 7.53   | TCP10L   | 21q22.11      |
| 221732_at    | 1.00 | 0.97 | P     | 783.03  | 0.19 | 0.01 | A     | 154.17 | ENTPD8   | 17q25.3       |
| 227500_at    | 1.00 | 0.96 | P,M   | 201.57  | 0.19 | 0.00 | A     | 38.67  |          | 7p22.2        |
| 218245_at    | 0.99 | 0.93 | P     | 288.20  | 0.19 | 0.02 | A     | 57.93  | E2IG4    | 11q13.3       |
| 218966_at    | 0.99 | 0.95 | P     | 614.17  | 0.19 | 0.00 | P     | 118.10 | MYO5C    | 15q21         |
| 213403_at    | 0.97 | 0.88 | P     | 47.03   | 0.19 | 0.01 | A     | 9.27   |          |               |
| 221044_s_at  | 1.00 | 0.96 | P     | 199.90  | 0.19 | 0.01 | M,A   | 38.53  | TRIM34   | 11p15         |
| 204131_s_at  | 0.99 | 0.95 | P     | 642.97  | 0.19 | 0.00 | P     | 122.77 | FOXO3A   | 6q21          |
| 229553_at    | 0.99 | 0.92 | P     | 267.73  | 0.19 | 0.01 | P     | 52.30  | PGM2L1   | 11q13.3       |
| 217966_s_at  | 0.99 | 0.94 | P     | 98.43   | 0.19 | 0.01 | A     | 19.03  | C1orf24  | 1q25          |
| 242579_at    | 1.00 | 0.96 | P     | 112.20  | 0.19 | 0.01 | A     | 21.83  |          |               |
| 231861_at    | 1.00 | 0.97 | P     | 126.83  | 0.19 | 0.00 | P,A   | 24.47  | LRP10    | 14q11.2       |
| 211538_s_at  | 1.00 | 0.97 | P     | 342.93  | 0.19 | 0.00 | P     | 66.07  |          |               |
| 223464_at    | 1.00 | 0.95 | P     | 246.63  | 0.19 | 0.01 | A     | 48.23  | OSBPL5   | 11p15.4       |
| 242123_at    | 0.98 | 0.90 | P     | 102.73  | 0.20 | 0.00 | P     | 19.67  | MPRA     | 1p35.3        |
| 223233_s_at  | 1.00 | 0.99 | P,A   | 210.17  | 0.20 | 0.00 | A     | 40.90  | CGN      | 1q21          |
| 234665_x_at  | 1.00 | 0.97 | P     | 438.47  | 0.20 | 0.00 | P,M   | 84.60  | HHLA3    | 1p31.2        |
| 243666_at    | 0.99 | 0.95 | P     | 47.13   | 0.20 | 0.01 | A     | 9.37   | BRUNOL4  | 18q12         |
| 242868_at    | 0.99 | 0.93 | P,M   | 64.07   | 0.20 | 0.00 | A     | 12.33  |          |               |
| 204058_at    | 0.99 | 0.92 | P     | 681.00  | 0.20 | 0.00 | P     | 131.77 | ME1      | 6q12          |
| 221750_at    | 1.00 | 0.96 | P     | 1073.07 | 0.20 | 0.01 | P     | 208.73 | HMGS1    | 5p14-p13      |
| 203564_at    | 1.00 | 0.98 | P     | 1863.00 | 0.20 | 0.00 | P     | 359.77 | FANCG    | 9p13          |
| 209598_at    | 0.99 | 0.94 | P     | 215.80  | 0.20 | 0.02 | A     | 44.07  | PNMA2    | 8p21.1        |
| 228696_at    | 1.00 | 0.96 | P     | 563.80  | 0.20 | 0.01 | P     | 113.30 | Prostein | 1q32.1        |
| 220144_s_at  | 1.00 | 0.99 | P     | 94.60   | 0.20 | 0.00 | A     | 18.43  | ANKRD5   | 20pter-q11.23 |
| 206032_at    | 0.99 | 0.94 | P     | 119.37  | 0.20 | 0.02 | P,A   | 25.07  | DSC3     | 18q12.1       |
| 226811_at    | 1.00 | 0.95 | P     | 75.40   | 0.20 | 0.00 | A     | 14.87  | FLJ20202 | 1p12          |
| 242539_at    | 1.00 | 0.98 | P     | 120.87  | 0.20 | 0.00 | P     | 23.60  |          |               |
| 226245_at    | 1.00 | 1.00 | P     | 1125.37 | 0.20 | 0.00 | P     | 221.30 | KCTD1    | 18q12.1       |
| 232051_at    | 1.00 | 0.96 | P,A   | 108.33  | 0.20 | 0.00 | A     | 21.33  | MGC10992 | 16q13         |
| 205427_at    | 0.98 | 0.91 | P     | 339.27  | 0.20 | 0.00 | M,A   | 66.60  | ZNF354A  | 5q35.3        |
| 226807_at    | 1.00 | 0.97 | P     | 328.70  | 0.20 | 0.00 | P,A   | 64.60  | ZFP1     | 16q22.3       |
| 201473_at    | 0.99 | 0.94 | P     | 785.77  | 0.20 | 0.00 | P     | 156.07 | JUNB     | 19p13.2       |
| 202023_at    | 0.99 | 0.94 | P     | 292.83  | 0.20 | 0.00 | A     | 57.47  | EFNA1    | 1q21-q22      |
| 233198_at    | 0.99 | 0.92 | P     | 235.57  | 0.20 | 0.01 | P,A   | 47.03  | LOC92497 | 12q23.3       |
| 210495_x_at  | 1.00 | 0.98 | P     | 154.73  | 0.20 | 0.00 | A     | 30.63  | FN1      | 2q34          |
| 230748_at    | 1.00 | 0.95 | P     | 60.80   | 0.20 | 0.00 | P     | 11.90  | SLC16A6  | 17q24.3       |
| 215093_at    | 1.00 | 0.96 | P     | 1078.47 | 0.20 | 0.01 | P     | 213.33 | NSDHL    | xq28          |
| 38340_at     | 0.99 | 0.94 | P     | 653.30  | 0.20 | 0.00 | A     | 127.90 | HIP1R    | 12q24         |
| 240690_at    | 1.00 | 0.97 | P     | 617.23  | 0.20 | 0.00 | P     | 121.67 |          |               |
| 204773_at    | 1.00 | 0.98 | P     | 198.57  | 0.20 | 0.01 | P,A   | 40.13  | IL11RA   | 9p13          |
| 1555486_a_at | 0.99 | 0.93 | P     | 447.57  | 0.20 | 0.00 | A     | 87.93  | FLJ14213 | 11p13         |
| 36499_at     | 1.00 | 0.97 | P     | 461.87  | 0.20 | 0.00 | P     | 91.23  | CELSR2   | 1p21          |
| 204604_at    | 1.00 | 0.97 | P     | 317.30  | 0.20 | 0.00 | P     | 63.40  | PFTK1    | 7q21-q22      |
| 228341_at    | 1.00 | 0.98 | P     | 185.73  | 0.20 | 0.00 | P     | 36.80  | FLJ31265 | 3q22.1        |
| 216867_s_at  | 1.00 | 0.95 | P,A   | 44.77   | 0.20 | 0.01 | A     | 9.03   | PDGFA    | 7p22          |
| 237680_at    | 0.98 | 0.91 | P,M   | 62.40   | 0.20 | 0.01 | A     | 12.83  |          |               |
| 209164_s_at  | 0.99 | 0.94 | P     | 619.60  | 0.20 | 0.00 | A     | 123.00 | CYB561   | 17q11-qter    |
| 219201_s_at  | 0.99 | 0.92 | P     | 147.70  | 0.20 | 0.01 | A     | 30.30  | TWSG1    | 18p11.3       |
| 228393_s_at  | 1.00 | 0.96 | P     | 227.27  | 0.20 | 0.00 | P     | 45.43  | ZNF302   | 19q13.12      |
| 203231_s_at  | 0.99 | 0.92 | P     | 477.43  | 0.20 | 0.00 | P,A   | 95.47  | SCA1     | 6p23          |
| 219232_s_at  | 1.00 | 0.98 | P     | 167.27  | 0.20 | 0.02 | P     | 35.17  | EGLN3    | 14q13.1       |
| 218062_x_at  | 1.00 | 0.99 | P     | 1175.30 | 0.20 | 0.00 | P     | 236.17 | CDC42EP4 | 17q24-q25     |
| 229292_at    | 1.00 | 0.99 | P     | 251.23  | 0.20 | 0.02 | A     | 52.17  | EPB41L5  | 2q14.2        |
| 223540_at    | 0.98 | 0.91 | P     | 199.53  | 0.20 | 0.01 | A     | 40.57  | PVRL4    | 1q22-q23.2    |
| 1557302_at   | 0.99 | 0.92 | P     | 178.37  | 0.20 | 0.01 | P,A   | 36.67  |          |               |
| 218129_s_at  | 0.97 | 0.88 | P     | 386.77  | 0.20 | 0.00 | P     | 78.03  | NFYB     | 12q22-q23     |
| 242462_at    | 0.99 | 0.92 | P     | 262.83  | 0.20 | 0.00 | P,A   | 52.83  |          |               |
| 205977_s_at  | 1.00 | 0.98 | P     | 317.93  | 0.20 | 0.00 | A     | 64.70  | EPHA1    | 7q34          |
| 228608_at    | 0.99 | 0.94 | P     | 49.97   | 0.20 | 0.01 | A     | 10.53  | VGONL1   | 13q32.3       |
| 229515_at    | 1.00 | 0.99 | P     | 134.93  | 0.20 | 0.00 | P     | 27.17  | PAWR     | 12q21         |
| 236543_at    | 1.00 | 0.97 | P,A   | 50.37   | 0.20 | 0.02 | A     | 10.63  |          |               |
| 228937_at    | 1.00 | 0.96 | P     | 281.93  | 0.20 | 0.00 | P     | 57.17  | FLJ38725 | 13q14.11      |
| 220261_s_at  | 0.97 | 0.88 | P     | 112.03  | 0.20 | 0.01 | A     | 23.17  | ZDHHC4   | 7p22.2        |
| 220088_at    | 1.00 | 0.96 | P,M,A | 60.50   | 0.20 | 0.01 | A     | 12.37  | CSR1     | 19q13.3-q13.4 |
| 1559171_at   | 0.98 | 0.89 | P,A   | 31.70   | 0.21 | 0.03 | A     | 6.87   |          |               |
| 212509_s_at  | 1.00 | 0.97 | P     | 504.80  | 0.21 | 0.00 | P,A   | 102.43 | FLJ46603 | 17q25.3       |
| 204532_x_at  | 1.00 | 0.96 | P     | 446.97  | 0.21 | 0.02 | P,A   | 95.90  | UGT1A6   | 2q37          |



|              |      |      |     |         |      |      |    |         |              |                 |
|--------------|------|------|-----|---------|------|------|----|---------|--------------|-----------------|
| 1569136_at   | 1.00 | 0.98 | P   | 23.77   | 0.21 | 0.01 | PA | 5.00    | MGAT4A       | 2q12            |
| 226885_at    | 1.00 | 0.98 | P   | 343.80  | 0.21 | 0.00 | P  | 69.63   |              |                 |
| 238632_at    | 0.99 | 0.93 | P   | 71.20   | 0.21 | 0.03 | A  | 15.23   |              |                 |
| 218531_at    | 1.00 | 0.98 | P   | 693.97  | 0.21 | 0.00 | P  | 141.73  | FLJ21749     | 11q13.1         |
| 209500_x_at  | 1.00 | 0.96 | P   | 484.40  | 0.21 | 0.00 | P  | 98.43   | TNFSF13      | 17p13.1         |
| 219959_at    | 0.99 | 0.95 | P   | 382.23  | 0.21 | 0.00 | P  | 78.43   | MOCOS        | 18q12           |
| 227798_at    | 1.00 | 0.96 | P   | 650.80  | 0.21 | 0.00 | P  | 132.90  | MADH1        | 4q31            |
| 213358_at    | 0.99 | 0.93 | P   | 831.77  | 0.21 | 0.00 | P  | 170.70  | KIAA0802     | 18p11.22        |
| 204328_at    | 0.99 | 0.94 | P   | 260.80  | 0.21 | 0.00 | A  | 53.50   | EVER1        | 17q25.3         |
| 219901_at    | 0.97 | 0.88 | P   | 150.93  | 0.21 | 0.01 | P  | 31.27   | FGD6         | 12q23.1         |
| 37512_at     | 1.00 | 0.99 | P   | 86.63   | 0.21 | 0.02 | P  | 18.23   | RODH         | 12q13           |
| 209386_at    | 1.00 | 0.99 | P   | 3857.93 | 0.21 | 0.00 | P  | 788.17  | TM4SF1       | 3q21-q25        |
| 210542_s_at  | 1.00 | 0.97 | P   | 165.47  | 0.21 | 0.00 | A  | 34.27   | SLCO3A1      | 15q26           |
| 209099_x_at  | 0.99 | 0.94 | P   | 522.10  | 0.21 | 0.00 | P  | 107.00  | JAG1         | 20p12.1-p11.23  |
| 210993_s_at  | 0.99 | 0.93 | P   | 470.30  | 0.21 | 0.00 | P  | 97.50   | SMAD1        | 4q31            |
| 236313_at    | 0.99 | 0.94 | P   | 141.40  | 0.21 | 0.00 | PA | 29.33   | CDKN2B       | 9p21            |
| 201432_at    | 1.00 | 0.96 | P   | 3366.50 | 0.21 | 0.00 | P  | 691.33  | CAT          | 11p13           |
| 210845_s_at  | 1.00 | 0.97 | P   | 479.30  | 0.21 | 0.00 | P  | 98.50   | PLAUR        | 19q13           |
| 204243_at    | 1.00 | 0.98 | P   | 607.17  | 0.21 | 0.00 | P  | 124.70  | RLF          | 1p32            |
| 227811_at    | 0.99 | 0.92 | P   | 118.27  | 0.21 | 0.01 | A  | 25.03   | FGD3         | 9q22            |
| 210130_s_at  | 0.99 | 0.95 | P   | 129.63  | 0.21 | 0.02 | A  | 27.73   | TM7SF2       | 11q13           |
| 235591_at    | 0.97 | 0.87 | P   | 23.90   | 0.21 | 0.02 | A  | 5.23    | SSTR1        | 14q13           |
| 212590_at    | 0.99 | 0.93 | P   | 427.97  | 0.21 | 0.00 | P  | 88.67   | RRAS2        | 11p15.2         |
| 229666_s_at  | 1.00 | 0.97 | P   | 1693.57 | 0.21 | 0.00 | P  | 350.07  | CSTF3        | 11p13           |
| 239210_at    | 0.99 | 0.92 | P   | 28.47   | 0.21 | 0.00 | A  | 5.87    |              |                 |
| 233955_x_at  | 0.99 | 0.94 | P   | 1047.70 | 0.21 | 0.00 | P  | 216.67  | CXXC5        | 5q31.3          |
| 234491_s_at  | 1.00 | 0.98 | P   | 925.13  | 0.21 | 0.01 | P  | 192.93  | SAV1         | 14q13-q23       |
| 205596_s_at  | 1.00 | 0.98 | P   | 734.33  | 0.21 | 0.00 | P  | 151.77  | SMURF2       | 17q22-q23       |
| 229223_at    | 0.99 | 0.94 | P   | 183.63  | 0.21 | 0.00 | A  | 37.83   |              |                 |
| 229613_at    | 1.00 | 0.98 | P   | 152.13  | 0.21 | 0.00 | A  | 31.37   |              |                 |
| 210767_at    | 0.99 | 0.93 | P   | 68.20   | 0.21 | 0.00 | A  | 14.13   | NF2          | 22q12.2         |
| 204675_at    | 1.00 | 0.98 | P   | 1387.50 | 0.21 | 0.00 | P  | 286.37  | SRD5A1       | 5p15            |
| 230281_at    | 1.00 | 0.96 | P   | 430.43  | 0.21 | 0.01 | P  | 89.30   | FLJ32702     | 16q23.2         |
| 213540_at    | 1.00 | 0.97 | P   | 262.30  | 0.21 | 0.00 | A  | 54.77   | HSD17B8      | 6p21.3          |
| 238944_at    | 1.00 | 0.98 | P   | 312.40  | 0.21 | 0.02 | A  | 68.00   |              |                 |
| 1557129_a_at | 1.00 | 0.99 | P   | 394.43  | 0.21 | 0.02 | P  | 84.43   | CANP         | 11q12.2         |
| 224516_s_at  | 1.00 | 0.99 | P   | 930.53  | 0.21 | 0.00 | P  | 194.00  | CXXC5        | 5q31.3          |
| 225981_at    | 0.99 | 0.93 | P   | 244.77  | 0.21 | 0.00 | MA | 51.37   | C17orf28     | 17q25.2         |
| 216336_x_at  | 0.98 | 0.90 | P   | 1377.57 | 0.21 | 0.00 | P  | 287.73  | MT1E         | 16q13           |
| 214088_s_at  | 1.00 | 0.99 | P   | 154.43  | 0.21 | 0.00 | A  | 32.13   | FUT3         | 19p13.3         |
| 236528_at    | 0.99 | 0.92 | P   | 156.57  | 0.21 | 0.01 | PA | 33.43   | UBE2J1       | 6p16.1          |
| 217523_at    | 0.98 | 0.91 | P   | 989.60  | 0.21 | 0.00 | P  | 207.77  | CD44         | 11p13           |
| 227150_at    | 0.99 | 0.94 | P,M | 401.77  | 0.21 | 0.00 | A  | 84.03   |              |                 |
| 214866_at    | 1.00 | 1.00 | P   | 172.43  | 0.21 | 0.00 | A  | 36.00   | PLAUR        | 19q13           |
| 233748_x_at  | 0.98 | 0.91 | PA  | 181.30  | 0.21 | 0.00 | A  | 38.23   | PRKAG2       | 7q35-q36        |
| 229578_at    | 1.00 | 0.98 | P   | 357.60  | 0.21 | 0.00 | A  | 75.10   | JPH2         | 20q13.12        |
| 240655_at    | 0.99 | 0.93 | PA  | 56.90   | 0.21 | 0.01 | A  | 12.10   |              |                 |
| 226455_at    | 0.99 | 0.95 | P   | 785.93  | 0.21 | 0.00 | P  | 163.87  | CREB3L4      | 1q22            |
| 207675_x_at  | 0.99 | 0.94 | P,M | 281.20  | 0.21 | 0.00 | A  | 59.23   | ARTN         | 1p33-p32        |
| 224518_s_at  | 0.99 | 0.94 | PA  | 87.57   | 0.21 | 0.01 | A  | 18.70   | ZNF559       | 19p13.2         |
| 219077_s_at  | 1.00 | 0.96 | P   | 353.13  | 0.21 | 0.00 | MA | 74.23   | VWOX         | 16q23.3-q24.1   |
| 203919_at    | 0.94 | 0.83 | P,M | 44.87   | 0.21 | 0.03 | A  | 9.83    | TCEA2        | 20q13.33        |
| 237064_x_at  | 0.99 | 0.93 | P   | 162.07  | 0.21 | 0.01 | P  | 34.77   |              |                 |
| 230487_at    | 0.98 | 0.90 | PA  | 51.80   | 0.21 | 0.01 | A  | 11.27   |              | 6q25.3          |
| 230518_at    | 1.00 | 0.96 | P   | 331.30  | 0.22 | 0.00 | P  | 70.13   | EVA1         | 11q24           |
| 244467_at    | 0.99 | 0.94 | P   | 111.43  | 0.22 | 0.00 | A  | 23.70   |              |                 |
| 227280_s_at  | 1.00 | 0.98 | P   | 732.03  | 0.22 | 0.00 | P  | 156.07  | FLJ40432     | 2q34            |
| 227143_s_at  | 1.00 | 0.97 | P   | 461.63  | 0.22 | 0.01 | P  | 102.00  | BID          | 22q11.1         |
| 232124_at    | 0.99 | 0.92 | PA  | 14.57   | 0.22 | 0.00 | A  | 3.10    | DKFZP434B172 | 3p21.33         |
| 238030_at    | 1.00 | 0.97 | P   | 168.57  | 0.22 | 0.00 | P  | 35.83   |              |                 |
| 241704_x_at  | 1.00 | 0.96 | P   | 349.73  | 0.22 | 0.01 | P  | 76.07   | LOC162967    | 19q13.42        |
| 224925_at    | 0.97 | 0.88 | PA  | 42.50   | 0.22 | 0.02 | A  | 9.30    | PREX1        | 20q13.13        |
| 204584_at    | 1.00 | 0.97 | P   | 202.13  | 0.22 | 0.00 | A  | 43.20   | L1CAM        | xq28            |
| 218432_at    | 0.99 | 0.93 | P   | 1186.87 | 0.22 | 0.00 | P  | 253.90  | FBXO3        | 11p13           |
| 222996_s_at  | 1.00 | 0.98 | P   | 637.77  | 0.22 | 0.00 | P  | 137.43  | CXXC5        | 5q31.3          |
| 230404_at    | 1.00 | 0.95 | P   | 59.50   | 0.22 | 0.00 | A  | 12.77   |              | 5q23.3          |
| 216442_x_at  | 0.99 | 0.94 | P   | 125.97  | 0.22 | 0.01 | A  | 27.53   | FN1          | 2q34            |
| 201685_s_at  | 0.99 | 0.94 | P   | 115.87  | 0.22 | 0.00 | A  | 24.70   | C14orf92     | 14q11.2         |
| 205479_s_at  | 0.99 | 0.94 | P   | 105.67  | 0.22 | 0.01 | A  | 22.90   | PLAU         | 10q24           |
| 1552283_s_at | 1.00 | 0.99 | P   | 97.50   | 0.22 | 0.01 | A  | 21.07   | ZDHHC11      | 5p15.33         |
| 203509_at    | 1.00 | 0.98 | P   | 863.50  | 0.22 | 0.00 | P  | 185.33  | SORL1        | 11q23.2-q24.2   |
| 823_at       | 0.99 | 0.92 | P   | 396.63  | 0.22 | 0.00 | P  | 84.87   | OC3CL1       | 16q13           |
| 213713_s_at  | 0.99 | 0.93 | P,M | 278.37  | 0.22 | 0.01 | A  | 61.10   | LOC89944     | 11q25           |
| 202844_s_at  | 0.99 | 0.94 | P   | 739.70  | 0.22 | 0.01 | P  | 160.87  | RALBP1       | 18p11.3         |
| 203964_at    | 1.00 | 0.98 | P   | 1282.37 | 0.22 | 0.00 | P  | 276.07  | NMI          | 2p24.3-q21.3    |
| 201855_s_at  | 0.99 | 0.94 | P   | 909.67  | 0.22 | 0.01 | P  | 197.83  | KIAA0431     | 16q23.2         |
| 208456_s_at  | 0.97 | 0.88 | P   | 156.33  | 0.22 | 0.01 | PA | 34.13   | RRAS2        | 11p15.2         |
| 202081_at    | 1.00 | 0.98 | P   | 4101.93 | 0.22 | 0.00 | P  | 884.80  | IER2         | 19p13.13        |
| 202322_s_at  | 1.00 | 0.96 | P   | 896.17  | 0.22 | 0.00 | P  | 193.70  | GGPS1        | 1q43            |
| 204447_at    | 1.00 | 0.95 | PA  | 291.67  | 0.22 | 0.00 | A  | 62.93   | ProSAPIP1    | 20p13           |
| 213804_at    | 1.00 | 0.97 | P   | 126.70  | 0.22 | 0.02 | PA | 28.13   | INPP5B       | 1p34            |
| 228865_at    | 1.00 | 0.96 | P   | 163.93  | 0.22 | 0.01 | A  | 36.77   | SARG         | 1q32.1          |
| 205583_s_at  | 1.00 | 0.96 | P   | 570.57  | 0.22 | 0.01 | P  | 124.73  | FLJ23018     | xq23            |
| 234300_s_at  | 0.98 | 0.90 | P   | 69.37   | 0.22 | 0.01 | MA | 15.37   | ZFP28        | 19q13.43        |
| 203484_at    | 1.00 | 0.98 | P   | 6663.57 | 0.22 | 0.00 | P  | 1450.47 | SEC61G       | 7p11.2          |
| 211031_s_at  | 0.99 | 0.92 | P   | 120.47  | 0.22 | 0.01 | A  | 26.47   | CYLN2        | 7q11.23         |
| 57540_at     | 1.00 | 0.98 | P   | 132.27  | 0.22 | 0.00 | PA | 28.77   | RBK5         | 2p23.3          |
| 223842_s_at  | 0.99 | 0.94 | P   | 72.00   | 0.22 | 0.00 | A  | 15.70   | SCARA3       | 8p21            |
| 244050_at    | 0.99 | 0.95 | P   | 91.57   | 0.22 | 0.01 | A  | 20.67   | LOC401494    | 9p21.3          |
| 205832_at    | 1.00 | 0.95 | P   | 455.53  | 0.22 | 0.00 | A  | 100.90  | CPA4         | 7q32            |
| 217759_at    | 1.00 | 0.98 | P   | 1504.10 | 0.22 | 0.00 | P  | 330.23  | TRIM44       | 11p13           |
| 210069_at    | 0.99 | 0.93 | P   | 193.07  | 0.22 | 0.01 | P  | 42.70   | CPT1B        | 22q13.33        |
| 219371_s_at  | 0.99 | 0.95 | P   | 360.87  | 0.22 | 0.01 | PA | 79.73   | KLF2         | 19p13.13-p13.11 |
| 228461_at    | 1.00 | 0.98 | P   | 119.20  | 0.22 | 0.01 | A  | 26.60   | SH3MD4       | 2q13            |
| 215034_s_at  | 0.98 | 0.89 | P   | 1168.97 | 0.22 | 0.00 | P  | 258.37  | TM4SF1       | 3q21-q25        |
| 206825_at    | 1.00 | 0.97 | P   | 164.27  | 0.22 | 0.00 | A  | 36.13   | OXTR         | 3p25            |

|              |      |      |       |         |      |      |       |        |           |               |
|--------------|------|------|-------|---------|------|------|-------|--------|-----------|---------------|
| 210652_s_at  | 1.00 | 0.95 | P     | 214.03  | 0.22 | 0.00 | M,A   | 47.23  | C1orf34   | 1p32.3        |
| 225671_at    | 0.99 | 0.94 | P,A   | 386.57  | 0.22 | 0.01 | A     | 86.57  | LOC124976 | 17p13.3       |
| 228670_at    | 0.99 | 0.94 | P     | 302.73  | 0.22 | 0.01 | P     | 67.23  | TEP1      | 14q11.2       |
| 228065_at    | 0.99 | 0.94 | P     | 654.87  | 0.22 | 0.00 | P     | 144.57 | BCL9L     | 11q23.3       |
| 206557_at    | 1.00 | 0.95 | P     | 92.17   | 0.22 | 0.01 | A     | 20.57  | FLJ12985  | 19q13.42      |
| 241455_at    | 0.99 | 0.94 | P,M,A | 59.70   | 0.22 | 0.01 | A     | 13.43  |           |               |
| 239492_at    | 0.99 | 0.92 | P     | 117.67  | 0.22 | 0.01 | P,A   | 26.10  | SEC14L4   | 22q12.2       |
| 218490_s_at  | 1.00 | 0.99 | P     | 271.30  | 0.22 | 0.01 | P     | 60.47  | ZNF302    | 19q13.12      |
| 227264_at    | 0.97 | 0.88 | P     | 295.13  | 0.22 | 0.01 | A     | 65.50  | TRAF6     | 11p13         |
| 232771_at    | 0.98 | 0.90 | P,A   | 29.80   | 0.23 | 0.02 | A     | 6.90   | NRK       | xq22.3        |
| 212024_x_at  | 0.98 | 0.89 | P,M   | 693.30  | 0.23 | 0.00 | P,A   | 153.63 | FLI1      | 17p11.2       |
| 243188_at    | 1.00 | 0.97 | P     | 137.10  | 0.23 | 0.01 | P     | 30.67  | ZNF283    | 19q13.32      |
| 213659_at    | 1.00 | 0.96 | P     | 117.83  | 0.23 | 0.02 | P,A   | 26.77  | ZNF75     | xq26.3        |
| 204254_s_at  | 1.00 | 0.97 | P     | 538.73  | 0.23 | 0.00 | P     | 119.77 | VDR       | 12q12-q14     |
| 201681_s_at  | 1.00 | 0.99 | P     | 872.77  | 0.23 | 0.00 | P     | 194.53 | DLG5      | 10q23         |
| 206958_s_at  | 1.00 | 0.96 | P     | 1341.70 | 0.23 | 0.00 | P     | 299.43 | UPF3A     | 13q34         |
| 239007_at    | 1.00 | 0.97 | P     | 73.80   | 0.23 | 0.00 | P     | 16.47  | ZNF616    | 19q13.41      |
| 239236_at    | 0.99 | 0.95 | P     | 161.93  | 0.23 | 0.01 | P,M   | 36.67  |           |               |
| 221867_at    | 1.00 | 0.97 | P     | 131.87  | 0.23 | 0.00 | A     | 29.33  | FLJ31821  | 16q12.1       |
| 239528_at    | 0.98 | 0.89 | P     | 210.37  | 0.23 | 0.00 | A     | 47.03  | PROM2     | 2q11.2        |
| 219676_at    | 0.99 | 0.93 | P     | 236.07  | 0.23 | 0.00 | P,A   | 52.77  | ZNF435    | 6p21.33       |
| 239768_x_at  | 0.99 | 0.92 | P     | 89.27   | 0.23 | 0.01 | A     | 20.50  |           |               |
| 206698_at    | 0.99 | 0.94 | P     | 95.63   | 0.23 | 0.01 | A     | 21.87  | XK        | xp21.1        |
| 1558854_a_at | 0.98 | 0.89 | P     | 21.50   | 0.23 | 0.03 | A     | 5.00   | FLJ40342  | 17q21.32      |
| 204595_s_at  | 0.96 | 0.85 | P     | 183.63  | 0.23 | 0.01 | A     | 41.87  | STC1      | 8p21-p11.2    |
| 1558943_x_at | 1.00 | 0.95 | P     | 466.97  | 0.23 | 0.01 | P     | 105.63 | LOC91661  | 19q13.42      |
| 203026_at    | 1.00 | 0.97 | P     | 998.43  | 0.23 | 0.00 | P     | 222.87 | ZBTB5     | 9p13.1        |
| 1557145_at   | 1.00 | 0.97 | P     | 139.73  | 0.23 | 0.02 | P     | 32.20  | STK38     | 6p21          |
| 205130_at    | 1.00 | 0.99 | P     | 1773.27 | 0.23 | 0.00 | P     | 397.43 | RAGE      | 14q32         |
| 228999_at    | 1.00 | 0.97 | P     | 123.23  | 0.23 | 0.00 | P     | 27.60  | CHD2      | 15q26         |
| 208729_x_at  | 0.99 | 0.92 | P     | 1012.73 | 0.23 | 0.00 | P     | 229.20 | HLA-B     | 6p21.3        |
| 217165_x_at  | 1.00 | 0.98 | P     | 1297.90 | 0.23 | 0.02 | P,M   | 299.60 | MT2A      | 16q13         |
| 208763_s_at  | 1.00 | 0.98 | P     | 842.17  | 0.23 | 0.00 | P,M   | 189.23 | DSIP1     | xq22.3        |
| 215033_at    | 0.98 | 0.91 | P,A   | 81.20   | 0.23 | 0.01 | A     | 18.63  | TM4SF1    | 3q21-q25      |
| 235095_at    | 0.96 | 0.86 | P     | 106.60  | 0.23 | 0.01 | A     | 24.23  | LOC146439 | 16p13.3       |
| 219151_s_at  | 1.00 | 0.99 | P     | 234.13  | 0.23 | 0.00 | P     | 52.70  | RABL2B    | 22q13.33      |
| 229665_at    | 1.00 | 0.98 | P     | 849.33  | 0.23 | 0.01 | P     | 192.53 | CSTF3     | 11p13         |
| 230441_at    | 0.96 | 0.86 | P     | 73.17   | 0.23 | 0.01 | P,A   | 16.87  | KIAA1909  | 5p15.33       |
| 1558105_a_at | 0.99 | 0.92 | P     | 147.27  | 0.23 | 0.00 | P     | 33.30  |           |               |
| 214820_at    | 0.99 | 0.95 | P     | 189.93  | 0.23 | 0.01 | P     | 43.10  | C21orf107 | 21q22.2       |
| 210524_x_at  | 0.98 | 0.90 | P     | 973.93  | 0.23 | 0.00 | P     | 219.13 | MT1F      | 16q13         |
| 205190_at    | 0.99 | 0.95 | P     | 750.53  | 0.23 | 0.00 | P     | 169.63 | PLS1      | 3q23          |
| 230088_at    | 0.98 | 0.91 | P,A   | 44.97   | 0.23 | 0.01 | A     | 10.23  |           |               |
| 219101_x_at  | 0.99 | 0.95 | P,M   | 160.77  | 0.23 | 0.00 | A     | 36.47  | ABHD8     | 19p13.12      |
| 227613_at    | 0.98 | 0.89 | P     | 92.23   | 0.23 | 0.00 | A     | 20.97  |           |               |
| 228904_at    | 1.00 | 0.97 | P     | 420.03  | 0.23 | 0.00 | P     | 94.90  |           |               |
| 228126_x_at  | 0.99 | 0.92 | P,A   | 93.90   | 0.23 | 0.00 | A     | 21.60  | CTXN1     | 19            |
| 204657_s_at  | 1.00 | 0.98 | P     | 534.90  | 0.23 | 0.00 | A     | 121.03 | SHB       | 9p12-p11      |
| 225010_at    | 0.99 | 0.95 | P     | 2110.83 | 0.23 | 0.00 | P     | 479.93 | CCDC6     | 10q21         |
| 205756_s_at  | 1.00 | 0.99 | P     | 377.97  | 0.23 | 0.00 | P     | 85.60  | F8        | xq28          |
| 1569208_a_at | 0.98 | 0.89 | P     | 32.87   | 0.23 | 0.03 | A     | 7.87   |           |               |
| 243594_x_at  | 0.99 | 0.93 | P     | 186.70  | 0.23 | 0.00 | A     | 42.30  | SPIRE2    | 16q24         |
| 1555259_at   | 0.98 | 0.89 | P     | 245.73  | 0.23 | 0.00 | P,M   | 56.27  | ZAK       | 2q24.2        |
| 209367_at    | 1.00 | 0.97 | P     | 381.23  | 0.23 | 0.01 | P,M   | 87.67  | STXBP2    | 19p13.3-p13.2 |
| 205027_s_at  | 0.98 | 0.90 | P     | 32.33   | 0.23 | 0.01 | A     | 7.50   | MAP3K8    | 10p12.1       |
| 213629_x_at  | 0.98 | 0.89 | P     | 1080.43 | 0.23 | 0.01 | P     | 250.07 | MT1F      | 16q13         |
| 1557222_at   | 0.98 | 0.91 | P     | 41.50   | 0.23 | 0.00 | A     | 9.57   |           |               |
| 232028_at    | 1.00 | 0.98 | P     | 297.07  | 0.23 | 0.00 | P     | 67.80  |           |               |
| 226982_at    | 1.00 | 0.98 | P     | 310.90  | 0.23 | 0.00 | P     | 70.80  | ELL2      | 5q15          |
| 1569723_a_at | 1.00 | 0.98 | P,A   | 265.67  | 0.23 | 0.01 | M,A   | 61.37  | SPIRE2    | 16q24         |
| 226028_at    | 1.00 | 0.95 | P,A   | 23.30   | 0.23 | 0.01 | A     | 5.47   | ROBO4     | 11q24.2       |
| 209566_at    | 0.98 | 0.91 | P     | 292.47  | 0.23 | 0.01 | P     | 68.33  | INSIG2    | 2q14.2        |
| 1555842_at   | 0.99 | 0.93 | P     | 237.10  | 0.23 | 0.02 | P,M,A | 56.17  | LOC284356 | 19q13.33      |
| 218127_at    | 0.99 | 0.93 | P     | 605.77  | 0.23 | 0.00 | P     | 140.20 | NFYB      | 12q22-q23     |
| 242414_at    | 1.00 | 0.97 | P     | 659.47  | 0.23 | 0.00 | A     | 153.93 | QPRT      | 16p12.1       |
| 209633_at    | 1.00 | 0.99 | P     | 451.23  | 0.23 | 0.01 | P     | 104.80 | PPP2R3A   | 3q22.1        |
| 223592_s_at  | 1.00 | 0.96 | P     | 425.20  | 0.23 | 0.00 | P     | 98.10  | RNF135    | 17q11.2       |
| 1558487_a_at | 1.00 | 0.97 | P     | 1171.30 | 0.23 | 0.00 | P     | 270.83 | HNLF      | 7p13          |
| 204148_s_at  | 0.99 | 0.95 | P     | 342.23  | 0.24 | 0.00 | A     | 78.93  | POMZP3    | 7q11.23       |
| 1555894_s_at | 0.99 | 0.92 | P     | 379.20  | 0.24 | 0.00 | A     | 87.90  | LOC92154  | 16q22.1       |
| 235498_at    | 1.00 | 0.96 | P     | 75.67   | 0.24 | 0.00 | P,A   | 17.70  | MGC22773  | 1p31.1        |
| 212256_at    | 0.98 | 0.90 | P     | 749.83  | 0.24 | 0.00 | P     | 176.73 | GALNT10   | 5q33.2        |
| 225806_at    | 1.00 | 0.97 | P     | 478.70  | 0.24 | 0.00 | P     | 111.10 | JUB       | 14q11.2       |
| 1553764_a_at | 0.97 | 0.88 | P     | 309.67  | 0.24 | 0.00 | P     | 72.23  | JUB       | 14q11.2       |
| 218292_s_at  | 0.99 | 0.94 | P,A   | 133.80  | 0.24 | 0.02 | A     | 32.47  | PRKAG2    | 7q35-q36      |
| 219496_at    | 1.00 | 0.96 | P     | 358.70  | 0.24 | 0.00 | P     | 83.30  | C2orf26   | 2q13          |
| 238787_at    | 1.00 | 0.95 | P     | 193.57  | 0.24 | 0.01 | P     | 45.53  |           |               |
| 228567_at    | 1.00 | 0.97 | P     | 399.50  | 0.24 | 0.00 | P     | 93.30  |           |               |
| 218856_at    | 1.00 | 0.98 | P     | 1018.20 | 0.24 | 0.00 | M,A   | 237.13 | TNFRSF21  | 6p21.1-12.2   |
| 222462_s_at  | 0.99 | 0.92 | P     | 284.87  | 0.24 | 0.02 | P,A   | 69.37  | BACE1     | 11q23.2-q23.3 |
| 219032_x_at  | 1.00 | 0.98 | P     | 277.33  | 0.24 | 0.00 | P     | 64.53  | OPN3      | 1q43          |
| 204062_s_at  | 1.00 | 0.98 | P     | 103.27  | 0.24 | 0.02 | A     | 25.03  | ULK2      | 17p11.2       |
| 1556009_at   | 1.00 | 0.96 | P     | 118.60  | 0.24 | 0.00 | P     | 27.97  | PEX13     | 2p14-p16      |
| 234963_s_at  | 0.94 | 0.84 | P,A   | 113.13  | 0.24 | 0.01 | A     | 27.50  | FA2H      | 16q23         |
| 219228_at    | 0.99 | 0.94 | P     | 220.17  | 0.24 | 0.01 | P,M   | 52.27  | ZNF331    | 19q13.3-q13.4 |
| 206747_at    | 0.99 | 0.94 | P     | 254.73  | 0.24 | 0.00 | A     | 59.50  | KIAA0514  | 10q11.22      |
| 213959_s_at  | 0.99 | 0.94 | P     | 162.30  | 0.24 | 0.01 | P     | 38.63  | KIAA1005  | 16q12.2       |
| 201669_s_at  | 1.00 | 0.96 | P     | 4007.30 | 0.24 | 0.00 | P     | 939.50 | MARCKS    | 6q22.2        |
| 212443_at    | 1.00 | 0.96 | P,A   | 148.67  | 0.24 | 0.02 | A     | 36.40  | KIAA0540  | 3p21.31       |
| 213002_at    | 1.00 | 0.95 | P     | 496.27  | 0.24 | 0.00 | P     | 116.93 | MARCKS    | 6q22.2        |
| 224665_at    | 0.99 | 0.92 | P     | 1062.97 | 0.24 | 0.00 | P     | 249.93 | C10orf104 | 10q22.2       |
| 219270_at    | 0.98 | 0.89 | P,A   | 188.20  | 0.24 | 0.00 | A     | 43.90  | MGC4504   | 15q14         |
| 204842_x_at  | 0.98 | 0.91 | P     | 708.93  | 0.24 | 0.02 | P,A   | 170.50 | PRKAR2A   | 3p21.3-p21.2  |
| 204702_s_at  | 1.00 | 0.95 | P     | 312.13  | 0.24 | 0.01 | P     | 74.03  | NFE2L3    | 7p15-p14      |
| 211911_x_at  | 1.00 | 0.95 | P     | 1825.97 | 0.24 | 0.00 | P     | 430.87 | HLA-C     | 6p21.3        |
| 218854_at    | 0.99 | 0.92 | P     | 96.20   | 0.24 | 0.00 | M,A   | 22.77  | SART2     | 6q22          |

|              |      |      |       |         |      |      |       |        |            |              |
|--------------|------|------|-------|---------|------|------|-------|--------|------------|--------------|
| 200884_at    | 1.00 | 0.99 | P     | 313.20  | 0.24 | 0.00 | P,M,A | 74.13  | CKB        | 14q32        |
| 50221_at     | 0.96 | 0.85 | P     | 177.23  | 0.24 | 0.00 | A     | 41.83  | TFEB       | 6p21         |
| 205225_at    | 1.00 | 0.95 | P,M   | 179.43  | 0.24 | 0.00 | A     | 42.67  | ESR1       | 6q25.1       |
| 1556425_a_at | 1.00 | 0.98 | P     | 252.40  | 0.24 | 0.00 | P     | 59.63  | LOC284219  | 18p11.22     |
| 235739_at    | 1.00 | 0.96 | P     | 160.40  | 0.24 | 0.00 | A     | 38.03  |            |              |
| 226584_s_at  | 1.00 | 0.99 | P     | 303.83  | 0.24 | 0.00 | P     | 72.27  | C20orf55   | 20p13        |
| 205992_s_at  | 1.00 | 0.97 | P     | 56.43   | 0.24 | 0.02 | M,A   | 13.75  | IL15       | 4q31         |
| 212774_at    | 1.00 | 0.99 | P     | 976.60  | 0.24 | 0.00 | P     | 231.03 | ZNF238     | 1q44-qter    |
| 232281_at    | 1.00 | 0.96 | P     | 134.80  | 0.24 | 0.00 | P,A   | 32.03  |            |              |
| 209684_at    | 1.00 | 0.96 | P     | 313.77  | 0.24 | 0.00 | P     | 74.67  | RIN2       | 20p11.22     |
| 204059_s_at  | 1.00 | 0.96 | P     | 1260.77 | 0.24 | 0.00 | P     | 298.87 | ME1        | 6q12         |
| 213568_at    | 0.99 | 0.94 | P     | 179.47  | 0.24 | 0.00 | P     | 42.63  | OSR2       | 8q22.2       |
| 1552634_a_at | 0.99 | 0.93 | P     | 174.83  | 0.24 | 0.02 | P,A   | 42.23  | ZNF101     | 19p13.11     |
| 209140_x_at  | 1.00 | 1.00 | P     | 2277.20 | 0.24 | 0.00 | P     | 539.70 | HLA-C      | 6p21.3       |
| 223179_at    | 1.00 | 0.95 | P     | 312.20  | 0.24 | 0.00 | A     | 74.33  | MGC10500   | 16p12.1      |
| 241002_at    | 1.00 | 0.96 | P     | 46.60   | 0.24 | 0.02 | A     | 11.57  |            |              |
| 212775_at    | 1.00 | 0.98 | P     | 746.23  | 0.24 | 0.00 | P     | 177.30 | KIAA0657   | 2q36.1       |
| 223094_s_at  | 0.96 | 0.86 | P,A   | 122.07  | 0.24 | 0.00 | A     | 29.43  | ANKH       | 5p15.1       |
| 224664_at    | 1.00 | 0.98 | P     | 1932.20 | 0.24 | 0.00 | P     | 461.40 | C10orf104  | 10q22.2      |
| 221904_at    | 0.99 | 0.95 | P     | 100.67  | 0.24 | 0.01 | P,A   | 24.73  | MGC21688   | 3q27.3       |
| 1555874_x_at | 0.99 | 0.92 | P     | 228.13  | 0.24 | 0.01 | A     | 54.70  | MGC21881   | 9q21.11      |
| 236073_at    | 0.99 | 0.93 | P,A   | 56.57   | 0.24 | 0.01 | A     | 13.90  |            |              |
| 230406_at    | 0.99 | 0.93 | P,M,A | 114.40  | 0.24 | 0.01 | A     | 27.70  |            |              |
| 224496_s_at  | 1.00 | 0.97 | P     | 125.77  | 0.24 | 0.01 | P,A   | 30.60  | MGC10744   | 17p13.1      |
| 225746_at    | 0.98 | 0.91 | P     | 46.77   | 0.24 | 0.02 | A     | 11.63  | RAB11-FIP4 | 17q11.2      |
| 225509_at    | 1.00 | 0.97 | P     | 493.40  | 0.24 | 0.00 | P     | 118.20 | LOC56757   | 5q31-q32     |
| 235093_at    | 1.00 | 0.97 | P     | 587.83  | 0.24 | 0.00 | P     | 140.80 |            |              |
| 238853_at    | 1.00 | 0.95 | P,A   | 186.47  | 0.24 | 0.02 | A     | 46.27  |            |              |
| 224836_at    | 0.99 | 0.95 | P     | 181.13  | 0.24 | 0.00 | A     | 43.43  | FOX P1     | 3p14.1       |
| 34408_at     | 0.99 | 0.94 | P     | 223.80  | 0.24 | 0.00 | P     | 53.60  | RTN2       | 19q13.32     |
| 213351_s_at  | 0.99 | 0.94 | P,A   | 107.93  | 0.24 | 0.03 | A     | 26.97  | KIAA0779   | 3q21.3       |
| 244579_at    | 0.99 | 0.94 | P,A   | 124.97  | 0.24 | 0.02 | A     | 31.20  |            |              |
| 212325_at    | 0.97 | 0.89 | P     | 291.20  | 0.24 | 0.01 | P     | 70.73  | KIAA1102   | 4p14         |
| 203773_x_at  | 0.99 | 0.92 | P     | 1224.63 | 0.24 | 0.00 | P     | 293.63 | BLVRA      | 7p14-cen     |
| 37996_s_at   | 1.00 | 1.00 | P     | 285.07  | 0.24 | 0.00 | P     | 68.60  | DMPK       | 19q13.3      |
| 229160_at    | 1.00 | 0.96 | P     | 50.47   | 0.24 | 0.00 | A     | 12.17  | FLJ33516   | xq22.3       |
| 221696_s_at  | 1.00 | 0.99 | P     | 85.30   | 0.24 | 0.00 | P     | 20.80  | STYK1      | 12p13.31     |
| 240176_at    | 1.00 | 0.96 | P     | 99.13   | 0.25 | 0.02 | A     | 24.47  |            |              |
| 235142_at    | 0.99 | 0.92 | P     | 484.67  | 0.25 | 0.00 | P     | 117.53 | ZBTB8      | 1p34.3       |
| 229025_s_at  | 1.00 | 0.99 | P     | 1516.57 | 0.25 | 0.00 | P     | 366.17 | FLJ25059   | 11p14.1      |
| 225432_s_at  | 1.00 | 0.95 | P     | 270.03  | 0.25 | 0.00 | P,M,A | 65.57  | CSR P2BP   | 20p11.23     |
| 227450_at    | 1.00 | 0.98 | P     | 359.37  | 0.25 | 0.00 | P     | 88.07  | FLJ32115   | 12p13.1      |
| 224617_at    | 1.00 | 0.98 | P     | 2163.37 | 0.25 | 0.01 | P     | 526.47 | ROD1       | 9q33.1       |
| 235685_at    | 1.00 | 0.97 | P     | 174.43  | 0.25 | 0.00 | P     | 42.23  |            |              |
| 213668_s_at  | 0.99 | 0.92 | P     | 236.23  | 0.25 | 0.02 | P,A   | 58.83  | SOX4       | 6p22.3       |
| 231986_at    | 1.00 | 0.95 | P     | 61.70   | 0.25 | 0.00 | P,A   | 14.97  | RIMS1      | 6q12-q13     |
| 212662_at    | 1.00 | 0.97 | P     | 283.00  | 0.25 | 0.01 | P,M   | 69.47  | PVR        | 19q13.2      |
| 226809_at    | 1.00 | 0.96 | P     | 110.00  | 0.25 | 0.01 | P,M,A | 26.83  |            |              |
| 231231_at    | 0.95 | 0.85 | P,M,A | 45.53   | 0.25 | 0.01 | A     | 11.13  |            |              |
| 201349_at    | 0.99 | 0.92 | P     | 1238.20 | 0.25 | 0.00 | P     | 304.43 | SLC9A3R1   | 17q25.2      |
| 222392_x_at  | 1.00 | 0.97 | P     | 3680.07 | 0.25 | 0.00 | P     | 895.20 | PERP       | 6q24         |
| 206954_at    | 0.95 | 0.84 | P     | 154.70  | 0.25 | 0.02 | A     | 39.37  | WIT-1      | 11p13        |
| 1557236_at   | 1.00 | 0.96 | P     | 120.43  | 0.25 | 0.01 | P     | 30.17  |            |              |
| 226411_at    | 0.97 | 0.88 | P,M,A | 53.63   | 0.25 | 0.03 | A     | 14.00  | LOC115704  | 19p13.3      |
| 205467_at    | 1.00 | 0.96 | P,A   | 98.67   | 0.25 | 0.02 | A     | 24.93  | CASP10     | 2q33-q34     |
| 209522_s_at  | 1.00 | 0.97 | P     | 266.10  | 0.25 | 0.00 | P     | 65.07  | CRAT       | 9q34.1       |
| 222573_s_at  | 0.97 | 0.89 | P     | 536.97  | 0.25 | 0.00 | P     | 131.93 | SAV1       | 14q13-q23    |
| 227215_at    | 1.00 | 0.96 | P     | 275.77  | 0.25 | 0.00 | P,M,A | 68.07  | GOPC       | 6q21         |
| 204493_at    | 0.99 | 0.93 | P     | 358.47  | 0.25 | 0.00 | P     | 88.17  | BID        | 22q11.1      |
| 227116_at    | 1.00 | 0.99 | P     | 425.00  | 0.25 | 0.00 | P     | 104.43 | HSR G1     | 16q23.1      |
| 213427_at    | 1.00 | 0.97 | P     | 1792.00 | 0.25 | 0.00 | P     | 438.83 | RPP40      | 6p25.1       |
| 1554179_s_at | 0.99 | 0.92 | P,A   | 495.60  | 0.25 | 0.01 | A     | 124.50 | LYNX1      | 8q24.3       |
| 229318_at    | 1.00 | 0.97 | P     | 162.10  | 0.25 | 0.00 | P,M   | 40.00  |            |              |
| 219718_at    | 0.99 | 0.92 | P     | 141.70  | 0.25 | 0.01 | A     | 34.90  | FLJ10986   | 1p32.1       |
| 205584_at    | 0.99 | 0.95 | P     | 300.70  | 0.25 | 0.01 | P     | 74.70  | FLJ23018   | xq23         |
| 225022_at    | 1.00 | 0.97 | P     | 1040.87 | 0.25 | 0.00 | P     | 255.80 | GOPC       | 6q21         |
| 238028_at    | 0.99 | 0.94 | P     | 88.87   | 0.25 | 0.00 | A     | 21.83  |            | 6p21.1       |
| 203906_at    | 0.99 | 0.91 | P     | 147.57  | 0.25 | 0.01 | A     | 36.83  | KIAA0763   | 3p25.2       |
| 211926_s_at  | 0.97 | 0.89 | P     | 1075.73 | 0.25 | 0.00 | P     | 267.50 | MYH9       | 22q13.1      |
| 1562307_at   | 0.97 | 0.88 | P     | 27.13   | 0.25 | 0.00 | A     | 6.67   |            |              |
| 222858_s_at  | 1.00 | 0.97 | P     | 123.53  | 0.25 | 0.02 | A     | 31.70  | DAPP1      | 4q25-q27     |
| 237435_at    | 0.99 | 0.94 | P     | 22.30   | 0.25 | 0.01 | P,A   | 5.57   |            |              |
| 241459_at    | 1.00 | 0.98 | P,A   | 51.10   | 0.25 | 0.00 | A     | 12.60  |            |              |
| 208436_s_at  | 1.00 | 0.96 | P     | 259.17  | 0.25 | 0.00 | P,M   | 64.30  | IRF7       | 11p15.5      |
| 240081_at    | 1.00 | 0.97 | P     | 37.17   | 0.25 | 0.00 | A     | 9.23   |            |              |
| 229221_at    | 1.00 | 0.99 | P     | 686.53  | 0.25 | 0.00 | P     | 169.97 | CD44       | 11p13        |
| 210910_s_at  | 1.00 | 1.00 | P     | 336.33  | 0.25 | 0.00 | P     | 83.40  | POMZP3     | 7q11.23      |
| 219290_x_at  | 0.97 | 0.87 | P     | 272.13  | 0.25 | 0.01 | P     | 67.43  | DAPP1      | 4q25-q27     |
| 228032_s_at  | 1.00 | 0.98 | P     | 312.03  | 0.25 | 0.00 | P     | 77.27  |            |              |
| 217783_s_at  | 1.00 | 0.99 | P     | 707.40  | 0.25 | 0.00 | P     | 175.37 | CGI-127    | 2p23.3       |
| 228242_at    | 1.00 | 0.98 | P     | 110.10  | 0.25 | 0.02 | P,A   | 27.90  |            |              |
| 230679_at    | 1.00 | 0.97 | P     | 180.57  | 0.25 | 0.01 | P     | 45.07  |            |              |
| 224929_at    | 1.00 | 0.97 | P     | 231.40  | 0.25 | 0.00 | A     | 57.43  | LOC340061  | 5q31.3       |
| 227670_at    | 1.00 | 0.97 | P     | 223.40  | 0.25 | 0.01 | P,A   | 55.73  | ZNF75A     | 16p13.11     |
| 225299_at    | 0.99 | 0.94 | P     | 84.53   | 0.25 | 0.02 | A     | 21.70  | MYO5B      | 18q21        |
| 224891_at    | 1.00 | 0.99 | P     | 1530.63 | 0.25 | 0.00 | P     | 379.67 | FOXO3A     | 6q21         |
| 219298_at    | 1.00 | 0.98 | P,M   | 115.40  | 0.25 | 0.00 | A     | 28.93  | ECHDC3     | 10p14        |
| 232150_at    | 0.99 | 0.93 | P     | 212.40  | 0.25 | 0.01 | P,A   | 53.30  |            |              |
| 220432_s_at  | 1.00 | 0.96 | P     | 129.87  | 0.25 | 0.01 | P     | 32.70  | CYP39A1    | 6p21.1-p11.2 |
| 219410_at    | 1.00 | 0.96 | P     | 1559.60 | 0.25 | 0.00 | P     | 389.57 | FLJ10134   | 3q12.3       |
| 205042_at    | 1.00 | 0.97 | P     | 1669.93 | 0.25 | 0.00 | P     | 419.07 | GNE        | 9p13.1       |
| 204197_s_at  | 0.99 | 0.94 | P     | 144.47  | 0.25 | 0.01 | P,A   | 36.83  | RUNX3      | 1p36         |
| 235798_at    | 0.99 | 0.92 | P     | 69.13   | 0.25 | 0.01 | P,M   | 17.50  |            |              |
| 213075_at    | 0.99 | 0.93 | P,A   | 63.80   | 0.25 | 0.01 | A     | 16.27  | OLFML2A    | 9q34.11      |
| 225548_at    | 0.99 | 0.95 | P     | 759.50  | 0.25 | 0.00 | P     | 191.37 | ShmL       | 4q21.22      |
| 215299_x_at  | 1.00 | 0.96 | P     | 577.77  | 0.25 | 0.00 | P     | 144.80 | SULT1A1    | 16p12.1      |

|              |      |      |       |         |      |      |       |        |               |                |
|--------------|------|------|-------|---------|------|------|-------|--------|---------------|----------------|
| 206940_s_at  | 0.98 | 0.91 | P     | 135.47  | 0.26 | 0.00 | P,A   | 34.07  | POU4F1        | 13q21.1-q22    |
| 228400_at    | 1.00 | 0.96 | P     | 248.40  | 0.26 | 0.01 | P     | 63.53  |               |                |
| 238768_at    | 1.00 | 0.98 | P     | 464.37  | 0.26 | 0.00 | P     | 117.27 |               | 2p11.2         |
| 202951_at    | 1.00 | 0.99 | P     | 1056.30 | 0.26 | 0.01 | P     | 266.90 | STK38         | 6p21           |
| 209457_at    | 0.98 | 0.90 | P     | 537.63  | 0.26 | 0.00 | P     | 136.07 | DUSP5         | 10q25          |
| 231940_at    | 0.99 | 0.95 | P     | 320.07  | 0.26 | 0.00 | P     | 80.87  | ZNF529        | 19q13.13       |
| 243201_at    | 1.00 | 0.99 | P     | 45.23   | 0.26 | 0.01 | A     | 11.67  | HNRPH2        | Xq22           |
| 223576_at    | 1.00 | 0.97 | P     | 555.23  | 0.26 | 0.01 | P     | 141.47 | C6orf203      | 6q21           |
| 218603_at    | 1.00 | 0.95 | P     | 618.20  | 0.26 | 0.00 | P     | 156.30 | HECA          | 6q23-q24       |
| 209387_s_at  | 0.97 | 0.87 | P     | 1619.00 | 0.26 | 0.00 | P     | 412.50 | TM4SF1        | 3q21-q25       |
| 208998_at    | 1.00 | 1.00 | P     | 3219.63 | 0.26 | 0.00 | P     | 814.40 | UCP2          | 11q13          |
| 212543_at    | 1.00 | 0.97 | P     | 2321.37 | 0.26 | 0.00 | P     | 588.57 | AIM1          | 6q21           |
| 229030_at    | 0.97 | 0.87 | P     | 71.10   | 0.26 | 0.01 | P,A   | 18.10  |               |                |
| 222217_s_at  | 1.00 | 0.99 | P     | 387.13  | 0.26 | 0.00 | P     | 98.23  | SLC27A3       | 1q22           |
| 225411_at    | 0.99 | 0.93 | P     | 460.97  | 0.26 | 0.00 | P     | 117.30 | FLJ14681      | 2q13           |
| 209279_s_at  | 1.00 | 0.96 | P     | 1073.77 | 0.26 | 0.00 | P     | 271.77 | NSDHL         | xq28           |
| 1556284_at   | 0.99 | 0.93 | P     | 153.93  | 0.26 | 0.02 | P     | 40.33  | PPA2          | 4q25           |
| 228452_at    | 0.98 | 0.90 | P     | 121.63  | 0.26 | 0.00 | P     | 30.83  | C17orf39      | 17p11.2        |
| 202557_at    | 1.00 | 0.95 | P     | 497.43  | 0.26 | 0.00 | P     | 126.43 | STCH          | 21q11          |
| 203360_s_at  | 1.00 | 0.99 | P     | 960.43  | 0.26 | 0.00 | P     | 243.47 | MYCBP         | 1p33-p32.2     |
| 211676_s_at  | 0.97 | 0.89 | P     | 766.30  | 0.26 | 0.00 | P     | 195.63 | IFNGR1        | 6q23-q24       |
| 218983_at    | 0.97 | 0.87 | P     | 156.27  | 0.26 | 0.00 | P     | 40.03  | C1RL          | 12p13.31       |
| 217665_at    | 1.00 | 0.96 | P     | 68.93   | 0.26 | 0.02 | P     | 18.13  |               |                |
| 235729_at    | 1.00 | 0.99 | P     | 137.43  | 0.26 | 0.01 | P     | 35.90  |               |                |
| 214415_at    | 1.00 | 0.97 | P     | 27.43   | 0.26 | 0.01 | A     | 7.10   | ZNF514        | 2q11.2         |
| 218744_s_at  | 0.98 | 0.91 | P     | 357.80  | 0.26 | 0.01 | P     | 91.73  | PACSN3        | 11p12-p11.12   |
| 221589_s_at  | 1.00 | 0.98 | P     | 199.50  | 0.26 | 0.00 | P     | 51.03  | ALDH6A1       | 14q24.3        |
| 228857_at    | 1.00 | 0.96 | P,M   | 224.10  | 0.26 | 0.00 | P,M,A | 57.17  | LOC285831     | 6p21.32        |
| 208370_s_at  | 1.00 | 0.98 | P     | 2796.23 | 0.26 | 0.00 | P     | 715.87 | DSCR1         | 21q22.12       |
| 203268_s_at  | 0.97 | 0.88 | P     | 279.47  | 0.26 | 0.00 | A     | 71.23  | DRG2          | 17p11.2        |
| 215930_s_at  | 1.00 | 0.95 | P     | 216.53  | 0.26 | 0.01 | P     | 55.60  | MGEA6         | 14q13.3        |
| 212989_at    | 1.00 | 0.97 | P     | 436.67  | 0.26 | 0.00 | P     | 112.43 | TMEM23        | 10q11.2        |
| 219704_at    | 1.00 | 0.97 | P     | 216.33  | 0.26 | 0.02 | A     | 57.83  | YBX2          | 17p11.2-p13.1  |
| 217760_at    | 1.00 | 0.99 | P     | 976.63  | 0.26 | 0.00 | P     | 249.93 | TRIM44        | 11p13          |
| 230944_at    | 1.00 | 0.98 | P,A   | 95.53   | 0.26 | 0.00 | A     | 24.57  | MGC45491      | 6p21.1         |
| 224335_s_at  | 0.99 | 0.93 | P     | 264.20  | 0.26 | 0.00 | A     | 68.37  | BACE1         | 11q23.2-q23.3  |
| 201708_s_at  | 1.00 | 0.97 | P     | 530.13  | 0.26 | 0.01 | P,A   | 139.30 | NIPSNAP1      | 22q12.2        |
| 225959_s_at  | 1.00 | 0.98 | P     | 498.20  | 0.26 | 0.00 | P,A   | 128.73 | ZNRF1         | 16q22.3        |
| 226504_at    | 0.98 | 0.90 | P,M,A | 147.30  | 0.26 | 0.02 | A     | 39.47  | LOC150368     | 22q13.31       |
| 204346_s_at  | 1.00 | 0.95 | P     | 362.97  | 0.26 | 0.00 | P,M,A | 93.60  | RASSF1        | 3p21.3         |
| 209703_x_at  | 1.00 | 0.98 | P     | 97.03   | 0.26 | 0.01 | P     | 25.30  | DKFZP586A0522 | 12q13.13       |
| 232481_s_at  | 0.99 | 0.94 | P     | 105.13  | 0.26 | 0.01 | A     | 27.57  | SLITRK6       | 13q31.1        |
| 203313_s_at  | 0.99 | 0.93 | P     | 1057.83 | 0.26 | 0.00 | P     | 274.07 | TGIF          | 18p11.3        |
| 212311_at    | 0.98 | 0.90 | P     | 113.20  | 0.26 | 0.02 | M,A   | 30.80  | KIAA0746      | 4p15.31        |
| 226529_at    | 0.99 | 0.95 | P     | 731.97  | 0.26 | 0.00 | P     | 189.50 | FLJ11273      | 7p21.3         |
| 209834_at    | 1.00 | 0.97 | P,M,A | 235.83  | 0.26 | 0.01 | A     | 61.87  | CHST3         | 10q22.2        |
| 227432_s_at  | 0.98 | 0.91 | P     | 248.77  | 0.26 | 0.01 | P     | 65.80  | INSR          | 19p13.3-p13.2  |
| 206774_at    | 1.00 | 0.99 | P,A   | 84.67   | 0.26 | 0.01 | A     | 22.27  | FRMPD1        | 9p13.1         |
| 229810_at    | 1.00 | 0.99 | P     | 211.43  | 0.26 | 0.00 | P     | 54.80  |               |                |
| 213030_s_at  | 1.00 | 0.99 | P     | 178.80  | 0.26 | 0.01 | P,A   | 46.70  | PLXNA2        | 1q32.2         |
| 227196_at    | 1.00 | 0.98 | P     | 974.23  | 0.26 | 0.01 | P     | 254.57 | RHPN2         | 19q13.12       |
| 225886_at    | 1.00 | 0.96 | P     | 351.87  | 0.26 | 0.01 | P     | 92.50  | DDX5          | 17q21          |
| 226666_at    | 0.98 | 0.91 | P     | 327.00  | 0.26 | 0.00 | P     | 85.53  | DAAM1         | 14q23.1        |
| 212268_at    | 0.99 | 0.94 | P     | 726.60  | 0.26 | 0.00 | P     | 189.97 | SERPIN1       | 6p25           |
| 209282_at    | 0.99 | 0.93 | P,M,A | 252.43  | 0.26 | 0.00 | A     | 66.20  | PRKD2         | 19q13.3        |
| 227421_at    | 1.00 | 0.97 | P     | 634.47  | 0.27 | 0.00 | P     | 165.80 | C21orf57      | 21q22.3        |
| 225665_at    | 1.00 | 0.96 | P     | 2090.23 | 0.27 | 0.00 | P     | 547.90 | ZAK           | 2q24.2         |
| 228381_at    | 1.00 | 0.98 | P,M   | 164.23  | 0.27 | 0.00 | A     | 43.43  | ATF7IP2       | 16p13.2        |
| 216028_at    | 1.00 | 0.95 | P     | 464.30  | 0.27 | 0.00 | P     | 121.27 | DKFZP564C152  | 11             |
| 229506_at    | 0.97 | 0.88 | P     | 70.43   | 0.27 | 0.00 | A     | 18.57  |               |                |
| 228531_at    | 1.00 | 0.97 | P     | 71.43   | 0.27 | 0.00 | P,M,A | 18.77  | FLJ20073      | 7q21.3         |
| 1569443_s_at | 0.97 | 0.88 | P,A   | 59.47   | 0.27 | 0.00 | A     | 15.50  |               |                |
| 218388_at    | 1.00 | 0.96 | P     | 1377.03 | 0.27 | 0.00 | P     | 361.73 | PGLS          | 19p13.2        |
| 228864_at    | 0.98 | 0.89 | P     | 130.43  | 0.27 | 0.00 | P,A   | 34.57  | LOC115950     | 19p13.2        |
| 225264_at    | 1.00 | 0.98 | P     | 1461.47 | 0.27 | 0.00 | P     | 383.37 | RARSL         | 6q16.1         |
| 218780_at    | 1.00 | 0.99 | P     | 500.33  | 0.27 | 0.00 | P,M   | 131.97 | HOOK2         | 19p13.2        |
| 220325_at    | 0.99 | 0.95 | P,A   | 84.50   | 0.27 | 0.01 | A     | 22.40  | TAF7L         | xq22.1         |
| 220669_at    | 1.00 | 0.97 | P     | 66.63   | 0.27 | 0.01 | P     | 17.73  | HSNIN1        | 4q31.21        |
| 212757_s_at  | 1.00 | 0.98 | P     | 606.03  | 0.27 | 0.00 | P     | 160.87 | CAMK2G        | 10q22          |
| 210355_at    | 0.99 | 0.93 | P,A   | 21.53   | 0.27 | 0.01 | A     | 5.77   | PTHLH         | 12p12.1-p11.2  |
| 201110_s_at  | 1.00 | 0.95 | P     | 1784.40 | 0.27 | 0.01 | P     | 474.10 | THBS1         | 15q15          |
| 214323_s_at  | 1.00 | 0.99 | P     | 2496.80 | 0.27 | 0.00 | P     | 660.70 | UPF3A         | 13q34          |
| 224580_at    | 1.00 | 0.98 | P     | 129.87  | 0.27 | 0.01 | P,A   | 34.70  | SLC38A1       | 12q13.11       |
| 208812_x_at  | 1.00 | 1.00 | P     | 3027.57 | 0.27 | 0.00 | P     | 799.70 | HLA-C         | 6p21.3         |
| 227046_at    | 1.00 | 0.97 | P     | 355.20  | 0.27 | 0.00 | P     | 94.60  | SLC39A11      | 17q25.1        |
| 217149_x_at  | 1.00 | 0.95 | P     | 379.77  | 0.27 | 0.00 | P     | 100.50 | TNK1          | 17p13.1        |
| 235604_x_at  | 0.99 | 0.92 | P     | 102.77  | 0.27 | 0.00 | A     | 27.57  | ZNF493        | 19p13.11       |
| 203324_s_at  | 0.99 | 0.93 | P     | 2038.10 | 0.27 | 0.00 | P     | 541.57 | CAV2          | 7q31.1         |
| 202031_s_at  | 1.00 | 0.95 | P     | 978.30  | 0.27 | 0.00 | P     | 258.97 | DKFZP434J154  | 7p22.2         |
| 244139_s_at  | 1.00 | 0.95 | P     | 84.50   | 0.27 | 0.01 | P     | 22.70  | PDCC6         | 5pter-p15.2    |
| 243553_x_at  | 1.00 | 0.97 | P     | 179.70  | 0.27 | 0.01 | P     | 48.37  |               |                |
| 212203_x_at  | 1.00 | 0.96 | P     | 1504.33 | 0.27 | 0.00 | P     | 401.20 | IFITM3        | 11p15.5        |
| 206770_s_at  | 0.99 | 0.94 | P     | 741.00  | 0.27 | 0.00 | P     | 197.40 | SLC35A3       | 1p21           |
| 228698_at    | 1.00 | 0.95 | P     | 91.30   | 0.27 | 0.01 | P     | 24.70  | SOX7          | 8p22           |
| 238022_at    | 1.00 | 0.95 | P     | 1238.70 | 0.27 | 0.00 | P     | 330.53 |               | 16q12.2        |
| 231183_s_at  | 1.00 | 0.95 | P     | 90.53   | 0.27 | 0.00 | A     | 24.17  | JAG1          | 20p12.1-p11.23 |
| 239845_at    | 0.98 | 0.90 | P     | 65.43   | 0.27 | 0.00 | P,A   | 17.43  |               |                |
| 203038_at    | 1.00 | 1.00 | P     | 1161.00 | 0.27 | 0.00 | P     | 309.20 | PTPRK         | 6q22.2-23.1    |
| 229692_at    | 1.00 | 0.97 | P     | 231.90  | 0.27 | 0.00 | A     | 61.90  |               |                |
| 244552_at    | 1.00 | 0.99 | P     | 144.57  | 0.27 | 0.00 | A     | 38.80  |               |                |
| 228812_at    | 0.99 | 0.95 | P     | 137.57  | 0.27 | 0.01 | P     | 36.90  |               | 19p13.2        |
| 1554906_a_at | 0.98 | 0.91 | P     | 103.10  | 0.27 | 0.01 | P     | 27.57  | MPHOSPH6      | 16q23.3        |
| 226925_at    | 1.00 | 0.98 | P     | 384.33  | 0.27 | 0.00 | P     | 102.43 | FLJ23751      | 3q23           |
| 1558486_at   | 1.00 | 0.98 | P     | 77.10   | 0.27 | 0.00 | A     | 20.70  | LOC115648     | 19p13.11       |
| 1560647_at   | 0.97 | 0.88 | P     | 34.47   | 0.27 | 0.03 | P     | 9.77   |               |                |
| 211986_at    | 0.99 | 0.94 | P     | 1472.90 | 0.27 | 0.00 | P     | 394.87 | MGC5395       | 11q12.2        |

|              |      |      |       |         |      |      |       |        |              |                 |
|--------------|------|------|-------|---------|------|------|-------|--------|--------------|-----------------|
| 203002_at    | 0.99 | 0.94 | P     | 1972.27 | 0.27 | 0.00 | P     | 528.93 | AMOTL2       | 3q21-q22        |
| 207616_s_at  | 0.97 | 0.89 | P     | 930.00  | 0.27 | 0.00 | P     | 250.23 | TANK         | 2q24-q31        |
| 219406_at    | 0.99 | 0.92 | P     | 148.20  | 0.27 | 0.00 | A     | 39.70  | MGC955       | 1p34.1          |
| 221669_s_at  | 0.98 | 0.90 | P     | 573.60  | 0.27 | 0.00 | P     | 154.47 | ACAD8        | 11q25           |
| 206941_x_at  | 1.00 | 0.97 | P,M   | 79.50   | 0.27 | 0.01 | A     | 21.43  | SEMA3E       | 7q21.11         |
| 200862_at    | 0.98 | 0.91 | P     | 2654.03 | 0.27 | 0.00 | P     | 708.47 | DHCR24       | 1p33-p31.1      |
| 210205_at    | 0.99 | 0.94 | P     | 114.77  | 0.27 | 0.02 | A     | 31.67  | B3GALT4      | 6p21.3          |
| 239891_x_at  | 0.98 | 0.91 | P     | 1535.97 | 0.27 | 0.00 | P     | 415.13 |              | 18p11.22        |
| 231644_at    | 0.99 | 0.93 | P     | 45.50   | 0.27 | 0.01 | A     | 12.60  |              |                 |
| 202748_at    | 1.00 | 0.98 | P     | 280.73  | 0.27 | 0.01 | P     | 75.70  | GBP2         | 1p22.2          |
| 204862_s_at  | 1.00 | 0.95 | P     | 267.97  | 0.27 | 0.00 | A     | 71.93  | NME3         | 16q13           |
| 215626_at    | 0.99 | 0.95 | P     | 68.83   | 0.27 | 0.01 | P     | 18.73  |              |                 |
| 205307_s_at  | 1.00 | 0.98 | P     | 35.53   | 0.27 | 0.02 | A     | 9.97   | KMO          | 1q42-q44        |
| 201422_at    | 1.00 | 0.96 | P     | 823.60  | 0.27 | 0.00 | P     | 222.30 | IFI30        | 19p13.1         |
| 229016_s_at  | 0.99 | 0.94 | P     | 52.50   | 0.27 | 0.01 | A     | 14.37  | TRERF1       | 6p21.1-p12.1    |
| 225703_at    | 1.00 | 0.96 | P     | 385.10  | 0.27 | 0.00 | P     | 103.73 | KIAA1545     | 12q24.33        |
| 1555137_a_at | 0.98 | 0.89 | P,A   | 82.63   | 0.27 | 0.01 | A     | 22.77  | FGD6         | 12q23.1         |
| 222237_s_at  | 1.00 | 0.97 | P     | 83.63   | 0.27 | 0.00 | P     | 22.67  | ZNF228       | 19q13.2         |
| 211006_s_at  | 1.00 | 0.96 | P,M   | 96.97   | 0.27 | 0.01 | A     | 26.63  | KCNB1        | 20q13.2         |
| 230469_at    | 1.00 | 0.98 | P     | 106.87  | 0.28 | 0.01 | P     | 29.13  | PLEKHK1      | 10q21.3         |
| 215732_s_at  | 0.99 | 0.92 | P     | 116.07  | 0.28 | 0.02 | P,A   | 32.57  | DTX2         | 7q11.23         |
| 242923_at    | 1.00 | 0.98 | P     | 124.93  | 0.28 | 0.01 | P     | 34.60  | MGC15634     | 1q42.13         |
| 235190_at    | 0.99 | 0.94 | P     | 543.23  | 0.28 | 0.00 | P     | 146.93 | CALM2        | 2p21            |
| 225699_at    | 1.00 | 0.99 | P     | 1288.93 | 0.28 | 0.00 | P     | 349.77 | LOC285958    | 7p13            |
| 218263_s_at  | 1.00 | 0.99 | P     | 1741.73 | 0.28 | 0.00 | P     | 473.07 | LOC58486     | 11p15.3         |
| 220760_x_at  | 0.98 | 0.89 | P     | 442.47  | 0.28 | 0.01 | P,M   | 121.93 | FLJ14345     | 19q13.42        |
| 211965_at    | 0.99 | 0.93 | P     | 390.47  | 0.28 | 0.01 | P     | 107.70 | ZFP36L1      | 14q22-q24       |
| 226206_at    | 1.00 | 0.99 | P     | 926.83  | 0.28 | 0.00 | P     | 252.13 | MAFK         | 7p22.3          |
| 217419_x_at  | 1.00 | 0.99 | P     | 1285.33 | 0.28 | 0.00 | P     | 350.33 | AGRN         | 1p36.33         |
| 1565162_s_at | 0.97 | 0.88 | P     | 1909.73 | 0.28 | 0.00 | P     | 524.77 | MGST1        | 12p12.3-p12.1   |
| 209101_at    | 0.97 | 0.87 | P     | 498.73  | 0.28 | 0.00 | P     | 136.73 | CTGF         | 6q23.1          |
| 205103_at    | 0.99 | 0.95 | P     | 326.73  | 0.28 | 0.00 | M,A   | 89.13  | CROC4        | 1q23.1          |
| 201868_s_at  | 0.99 | 0.95 | P,A   | 64.27   | 0.28 | 0.02 | A     | 17.97  | TBL1X        | xp22.3          |
| 226501_at    | 1.00 | 0.99 | P     | 654.17  | 0.28 | 0.00 | P     | 178.67 | LOC63929     | 22q13.31-q13.33 |
| 232138_at    | 0.99 | 0.94 | P     | 294.20  | 0.28 | 0.00 | P     | 80.53  | MBNL2        | 13q32.2         |
| 202558_s_at  | 0.99 | 0.94 | P     | 544.73  | 0.28 | 0.00 | P     | 149.90 | STCH         | 21q11           |
| 225502_at    | 0.97 | 0.88 | P     | 53.77   | 0.28 | 0.01 | P,A   | 15.13  | DOCK8        | 9p24.3          |
| 1552633_at   | 1.00 | 0.98 | P     | 146.17  | 0.28 | 0.00 | P     | 40.13  | ZNF101       | 19p13.11        |
| 229385_s_at  | 1.00 | 0.99 | P     | 130.80  | 0.28 | 0.00 | A     | 35.97  | PLAC2        | 19p13.3         |
| 204872_at    | 1.00 | 0.97 | P     | 344.40  | 0.28 | 0.00 | P     | 94.77  | TLE4         | 9q21.32         |
| 232803_at    | 1.00 | 0.96 | P     | 54.50   | 0.28 | 0.00 | P,A   | 15.03  |              |                 |
| 227934_at    | 0.98 | 0.90 | P     | 265.10  | 0.28 | 0.00 | P     | 73.27  |              |                 |
| 212642_s_at  | 0.99 | 0.93 | P     | 341.60  | 0.28 | 0.01 | P     | 95.07  | HIVEP2       | 6q23-q24        |
| 229660_at    | 1.00 | 0.97 | P     | 96.80   | 0.28 | 0.01 | A     | 26.77  | FLJ31606     | 16q24.3         |
| 238576_at    | 1.00 | 1.00 | P     | 118.67  | 0.28 | 0.00 | P,M,A | 33.00  |              |                 |
| 226127_at    | 1.00 | 0.96 | P     | 704.70  | 0.28 | 0.00 | P     | 194.37 | DEPC-1       | 11p11.2         |
| 218276_s_at  | 0.99 | 0.92 | P     | 730.80  | 0.28 | 0.00 | P     | 202.40 | SAV1         | 14q13-q23       |
| 231853_at    | 1.00 | 0.98 | P     | 204.80  | 0.28 | 0.00 | P     | 56.53  | TUBD1        | 17q23.2         |
| 226360_at    | 1.00 | 0.97 | P     | 309.33  | 0.28 | 0.00 | P     | 85.70  | FLJ12747     | 22q12.1         |
| 223628_at    | 0.99 | 0.94 | P,A   | 114.23  | 0.28 | 0.01 | A     | 32.37  | DKFZp434N035 | 22q11.21        |
| 224952_at    | 1.00 | 0.97 | P     | 143.73  | 0.28 | 0.01 | A     | 40.03  | DKFZP564D166 | 17q24.1         |
| 202554_s_at  | 1.00 | 0.98 | P     | 1043.37 | 0.28 | 0.00 | P     | 289.47 | GSTM3        | 1p13.3          |
| 228661_s_at  | 1.00 | 0.98 | P     | 217.30  | 0.28 | 0.00 | P,M,A | 60.20  |              |                 |
| 225448_at    | 1.00 | 0.98 | P     | 758.10  | 0.28 | 0.01 | P     | 212.37 | NAPG         | 18p11.21        |
| 236862_at    | 1.00 | 0.97 | P     | 83.47   | 0.28 | 0.02 | M,A   | 23.63  | GOPC         | 6q21            |
| 204090_at    | 1.00 | 0.95 | P     | 431.50  | 0.28 | 0.02 | P,A   | 121.73 | STK19        | 6p21.3          |
| 233112_at    | 0.98 | 0.91 | P     | 49.90   | 0.28 | 0.03 | A     | 14.33  |              |                 |
| 218913_s_at  | 0.99 | 0.94 | P     | 334.00  | 0.28 | 0.00 | A     | 93.47  | GMIP         | 19p11-p12       |
| 241869_at    | 1.00 | 0.98 | P     | 103.83  | 0.28 | 0.01 | P,M,A | 29.20  | APOL6        | 22q13.1         |
| 203431_s_at  | 0.99 | 0.92 | P     | 177.40  | 0.28 | 0.01 | P,M,A | 49.87  | RICS         | 11q24-q25       |
| 213945_s_at  | 0.98 | 0.89 | P,M,A | 52.43   | 0.28 | 0.03 | A     | 15.13  | NUP210       | 3p25.2-p25.1    |
| 207714_s_at  | 0.96 | 0.87 | P     | 505.20  | 0.28 | 0.01 | A     | 143.33 | SERPINH1     | 11q13.5         |
| 219696_at    | 0.98 | 0.89 | P     | 365.23  | 0.28 | 0.00 | P     | 101.93 | FLJ20054     | 1q13.1          |
| 218242_s_at  | 0.99 | 0.95 | P     | 543.57  | 0.28 | 0.00 | P     | 151.93 | CGI-85       | 11q13.2         |
| 1557103_a_at | 1.00 | 0.97 | P     | 51.50   | 0.28 | 0.00 | A     | 14.37  | LMTK3        | 19q13.33        |
| 228457_at    | 1.00 | 0.96 | P     | 58.50   | 0.28 | 0.01 | A     | 16.70  |              |                 |
| 218706_s_at  | 0.98 | 0.90 | P     | 767.50  | 0.28 | 0.00 | P     | 215.13 | NS3TP2       | 5q23.3          |
| 224495_at    | 1.00 | 0.97 | P,M,A | 105.27  | 0.28 | 0.00 | A     | 29.40  | MGC10744     | 17p13.1         |
| 219123_at    | 1.00 | 0.98 | P     | 424.43  | 0.28 | 0.00 | P     | 118.63 | ZNF232       | 17p13-p12       |
| 228095_at    | 1.00 | 0.97 | P     | 1026.03 | 0.28 | 0.01 | P     | 287.03 | PHF14        | 7p21.3          |
| 236471_at    | 1.00 | 0.96 | P     | 85.07   | 0.28 | 0.01 | P     | 23.93  | NFE2L3       | 7p15-p14        |
| 225786_at    | 0.99 | 0.94 | P     | 421.60  | 0.28 | 0.01 | P     | 118.70 | FAM36A       | 1q44            |
| 226231_at    | 1.00 | 0.96 | P     | 101.17  | 0.28 | 0.00 | P     | 28.50  | PAWR         | 12q21           |
| 201200_at    | 1.00 | 0.99 | P     | 1591.90 | 0.28 | 0.00 | P     | 444.90 | CREG         | 1q24            |
| 211458_s_at  | 0.97 | 0.87 | P     | 358.83  | 0.28 | 0.01 | P     | 100.93 | GABARAPL1    | 12p13.31        |
| 203394_s_at  | 0.98 | 0.91 | P     | 490.07  | 0.28 | 0.00 | P     | 138.10 | HES1         | 3q28-q29        |
| 231830_x_at  | 0.99 | 0.92 | P     | 118.43  | 0.28 | 0.00 | P,M   | 33.50  | RCP          | 8p11.22         |
| 211502_s_at  | 1.00 | 0.97 | P,A   | 63.27   | 0.28 | 0.00 | A     | 17.83  | PFTK1        | 7q21-q22        |
| 202339_at    | 0.99 | 0.94 | P     | 59.23   | 0.28 | 0.02 | A     | 17.20  | SYMPK        | 19q13.3         |
| 225812_at    | 0.99 | 0.93 | P     | 215.70  | 0.29 | 0.01 | A     | 61.47  |              |                 |
| 1558700_s_at | 1.00 | 1.00 | P     | 338.87  | 0.29 | 0.01 | P     | 96.47  | LOC339324    | 19q13.13        |
| 230708_at    | 1.00 | 0.97 | P     | 57.83   | 0.29 | 0.01 | A     | 16.53  | PRICKLE1     | 12q12           |
| 225867_at    | 1.00 | 0.95 | P     | 121.50  | 0.29 | 0.00 | A     | 34.57  | LOC114990    | 16p13.3         |
| 226576_at    | 0.99 | 0.94 | P     | 80.13   | 0.29 | 0.01 | P     | 22.97  | ARHGAP26     | 5q31            |
| 202429_s_at  | 0.99 | 0.94 | P     | 957.63  | 0.29 | 0.00 | P     | 271.30 | PPP3CA       | 4q21-q24        |
| 238885_at    | 1.00 | 0.97 | P     | 172.23  | 0.29 | 0.00 | A     | 49.00  |              |                 |
| 225602_at    | 0.98 | 0.90 | P     | 101.27  | 0.29 | 0.01 | P,M,A | 29.07  | C9orf19      | 9p13-p12        |
| 232874_at    | 0.99 | 0.94 | P,M   | 120.67  | 0.29 | 0.01 | A     | 34.73  | DOCK9        | 13q32.3         |
| 215359_x_at  | 1.00 | 0.97 | P     | 523.87  | 0.29 | 0.00 | P     | 148.13 | ZNF44        | 19p13.2         |
| 225396_at    | 1.00 | 0.99 | P     | 299.83  | 0.29 | 0.00 | P     | 85.43  | SYNCOILIN    | 1p34.3-p33      |
| 220242_x_at  | 1.00 | 0.98 | P     | 99.63   | 0.29 | 0.01 | P     | 28.50  | FLJ12985     | 19q13.42        |
| 212669_at    | 0.99 | 0.94 | P     | 391.63  | 0.29 | 0.00 | P     | 111.47 | CAMK2G       | 10q22           |
| 201746_at    | 1.00 | 0.98 | P     | 1227.20 | 0.29 | 0.00 | P     | 349.07 | TP53         | 17p13.1         |
| 205781_at    | 1.00 | 0.98 | P     | 245.20  | 0.29 | 0.00 | P     | 69.83  | C16orf7      | 16q24           |
| 226287_at    | 1.00 | 0.96 | P     | 1608.73 | 0.29 | 0.00 | P     | 458.53 | LOC81023     | 11p14           |
| 214016_s_at  | 1.00 | 0.97 | P     | 1100.20 | 0.29 | 0.01 | P     | 316.57 | SFPQ         | 1p34.3          |

|              |      |      |       |         |      |      |       |         |               |                 |
|--------------|------|------|-------|---------|------|------|-------|---------|---------------|-----------------|
| 209205_s_at  | 0.97 | 0.88 | P     | 659.67  | 0.29 | 0.01 | P     | 191.27  | LMO4          | 1p22.3          |
| 1564200_at   | 1.00 | 0.96 | P     | 57.17   | 0.29 | 0.01 | A     | 16.50   |               |                 |
| 233907_s_at  | 1.00 | 0.96 | P     | 79.13   | 0.29 | 0.01 | M,A   | 22.73   | LOC199827     | 1q32.2          |
| 202082_s_at  | 0.99 | 0.95 | P     | 418.20  | 0.29 | 0.01 | P     | 120.03  | SEC14L1       | 17q25.1-17q25.2 |
| 235542_at    | 0.99 | 0.92 | P     | 416.07  | 0.29 | 0.00 | P     | 118.93  | MGC22014      | 2p13.1          |
| 216350_s_at  | 0.99 | 0.94 | P,M,A | 56.53   | 0.29 | 0.02 | A     | 16.43   | ZNF10         | 12q24.33        |
| 239433_at    | 1.00 | 0.95 | P     | 166.87  | 0.29 | 0.01 | P,A   | 48.33   | FLJ23420      | 19p13.3         |
| 226609_at    | 0.99 | 0.94 | P     | 522.43  | 0.29 | 0.00 | P     | 149.80  | DCBLD1        | 6q22.31         |
| 205543_at    | 0.96 | 0.86 | P,M,A | 48.40   | 0.29 | 0.01 | A     | 14.13   | APG-1         | 4q28            |
| 227034_at    | 1.00 | 0.99 | P     | 594.93  | 0.29 | 0.00 | P     | 169.87  | 10-Sep        | 2q13            |
| 229317_at    | 1.00 | 0.97 | P     | 141.70  | 0.29 | 0.01 | P     | 40.87   |               |                 |
| 228280_at    | 0.99 | 0.95 | P     | 606.23  | 0.29 | 0.00 | P     | 174.33  | MGC14289      | 7q34            |
| 204462_s_at  | 0.99 | 0.93 | P     | 261.50  | 0.29 | 0.01 | A     | 76.23   | SLC16A2       | xq13.2          |
| 224917_at    | 0.99 | 0.93 | P     | 1580.47 | 0.29 | 0.01 | P     | 460.47  | VMP1          | 17q23.2         |
| 225079_at    | 0.99 | 0.92 | P     | 749.27  | 0.29 | 0.00 | P     | 215.33  | EMP2          | 16p13.2         |
| 227718_at    | 1.00 | 0.99 | P     | 544.30  | 0.29 | 0.01 | P     | 156.57  | PURB          | 7p13            |
| 211593_s_at  | 1.00 | 0.99 | P     | 587.67  | 0.29 | 0.00 | P     | 170.13  | MAST2         | 1p34.1          |
| 227367_at    | 0.99 | 0.95 | P     | 159.03  | 0.29 | 0.00 | P,A   | 45.67   | SLCO3A1       | 15q26           |
| 219635_at    | 0.99 | 0.94 | P     | 129.57  | 0.29 | 0.01 | P     | 37.40   | ZNF606        | 19q13.4         |
| 203395_s_at  | 1.00 | 0.96 | P     | 538.13  | 0.29 | 0.00 | P     | 154.70  | HES1          | 3q28-q29        |
| 218757_s_at  | 1.00 | 0.99 | P     | 2621.93 | 0.29 | 0.00 | P     | 752.13  | UPF3B         | xq25-q26        |
| 226040_at    | 1.00 | 0.98 | P     | 159.80  | 0.29 | 0.01 | P     | 46.23   |               |                 |
| 225988_at    | 1.00 | 0.97 | P     | 1355.37 | 0.29 | 0.00 | P     | 389.63  | HERC4         | 10q22.1         |
| 228330_at    | 0.99 | 0.94 | P     | 335.30  | 0.29 | 0.00 | P     | 96.73   | C6orf113      | 6q22.31         |
| 205306_x_at  | 1.00 | 0.96 | P     | 153.40  | 0.29 | 0.00 | A     | 44.40   | KMO           | 1q42-q44        |
| 206687_s_at  | 1.00 | 0.97 | P     | 164.20  | 0.29 | 0.00 | P,M,A | 47.47   | PTPN6         | 12p13           |
| 205294_at    | 1.00 | 0.98 | P,A   | 212.70  | 0.29 | 0.00 | A     | 61.23   | BAIAP2        | 17q25           |
| 214808_at    | 0.99 | 0.94 | P     | 190.67  | 0.29 | 0.01 | P,A   | 55.07   |               |                 |
| 215243_s_at  | 0.99 | 0.92 | P     | 188.37  | 0.29 | 0.03 | A     | 56.97   | GJB3          | 1p34            |
| 225211_at    | 0.99 | 0.92 | P,A   | 351.33  | 0.29 | 0.02 | A     | 102.63  | MGC16207      | 11q23.3         |
| 220945_x_at  | 1.00 | 0.99 | P     | 950.30  | 0.29 | 0.01 | P     | 276.30  | MANSC1        | 12p13.2         |
| 226403_at    | 0.98 | 0.89 | P     | 156.17  | 0.29 | 0.00 | A     | 44.77   | TMC4          | 19q13.42        |
| 211962_s_at  | 0.99 | 0.94 | P     | 2012.80 | 0.29 | 0.00 | P     | 582.83  | ZFP36L1       | 14q22-q24       |
| 1556346_at   | 0.99 | 0.93 | P     | 233.40  | 0.29 | 0.00 | P,A   | 67.23   |               |                 |
| 221701_s_at  | 0.99 | 0.93 | P     | 246.97  | 0.29 | 0.00 | P,A   | 71.63   | FLJ12541      | 15q22.33        |
| 238859_at    | 0.99 | 0.94 | P     | 109.93  | 0.29 | 0.00 | P     | 31.97   | KIAA0974      | 10q22.2         |
| 201160_s_at  | 1.00 | 0.98 | P     | 3131.77 | 0.29 | 0.00 | P     | 907.87  | CSDA          | 12p13.1         |
| 205807_s_at  | 0.99 | 0.95 | P     | 802.30  | 0.29 | 0.00 | P     | 231.67  | TUFT1         | 1q21            |
| 230026_at    | 1.00 | 0.95 | P     | 356.20  | 0.29 | 0.00 | P     | 103.43  | MRPL43        | 10q24.31        |
| 225541_at    | 1.00 | 0.99 | P     | 3319.03 | 0.29 | 0.01 | P     | 970.07  | LOC200916     | 3q26.31         |
| 55065_at     | 1.00 | 0.98 | P     | 415.30  | 0.30 | 0.00 | P     | 120.77  | MARK4         | 19q13.3         |
| 219001_s_at  | 1.00 | 0.98 | P     | 651.87  | 0.30 | 0.01 | P     | 190.03  | MGC10765      | 9p13.1          |
| 242766_at    | 1.00 | 0.99 | P     | 74.57   | 0.30 | 0.00 | P,A   | 21.70   |               |                 |
| 234921_at    | 1.00 | 0.96 | P     | 56.57   | 0.30 | 0.00 | A     | 16.47   |               | 19q13.43        |
| 202845_s_at  | 0.99 | 0.94 | P     | 2113.93 | 0.30 | 0.01 | P     | 617.73  | RALBP1        | 18p11.3         |
| 1559361_at   | 0.99 | 0.92 | P,M   | 69.63   | 0.30 | 0.02 | A     | 21.07   |               |                 |
| 207417_s_at  | 0.99 | 0.94 | P     | 90.17   | 0.30 | 0.02 | A     | 26.80   | ZNF177        | 19p13.2         |
| 1568868_at   | 1.00 | 0.95 | P     | 34.20   | 0.30 | 0.02 | P,A   | 10.23   |               | 2q21.1          |
| 222744_s_at  | 1.00 | 0.99 | P     | 265.53  | 0.30 | 0.00 | P,A   | 77.37   | TMLHE         | xq28            |
| 225410_at    | 1.00 | 0.96 | P     | 935.23  | 0.30 | 0.01 | A     | 274.23  | MGAT4A        | 2q12            |
| 240221_at    | 1.00 | 0.99 | P     | 207.77  | 0.30 | 0.00 | P     | 60.63   |               |                 |
| 236653_at    | 0.98 | 0.90 | P     | 63.80   | 0.30 | 0.02 | P,A   | 19.33   |               |                 |
| 231296_at    | 0.97 | 0.88 | P,M,A | 67.87   | 0.30 | 0.03 | A     | 20.40   |               | 7               |
| 227425_at    | 0.99 | 0.93 | P     | 95.90   | 0.30 | 0.02 | P     | 29.00   |               |                 |
| 208078_s_at  | 1.00 | 0.99 | P     | 334.03  | 0.30 | 0.00 | P,A   | 97.57   | TCF8          | 10p11.2         |
| 238401_at    | 0.98 | 0.91 | P,A   | 113.17  | 0.30 | 0.03 | A     | 35.27   | FLJ35220      | 17q25.3         |
| 224452_s_at  | 0.99 | 0.94 | P     | 643.53  | 0.30 | 0.00 | P     | 189.10  | MGC12966      | 7p22.2          |
| 226957_x_at  | 1.00 | 0.96 | P     | 210.03  | 0.30 | 0.00 | P,A   | 62.23   | RALBP1        | 18p11.3         |
| 38269_at     | 0.99 | 0.94 | P     | 568.60  | 0.30 | 0.00 | P     | 166.87  | PRKD2         | 19q13.3         |
| 203499_at    | 1.00 | 0.98 | P     | 191.67  | 0.30 | 0.01 | A     | 56.80   | EPHA2         | 1p36            |
| 208807_s_at  | 0.97 | 0.89 | P     | 424.77  | 0.30 | 0.00 | A     | 124.50  | CHD3          | 17p13.1         |
| 212776_s_at  | 0.98 | 0.90 | P     | 686.93  | 0.30 | 0.00 | P     | 202.63  | KIAA0657      | 2q36.1          |
| 1555929_s_at | 1.00 | 0.97 | P     | 73.63   | 0.30 | 0.00 | A     | 21.63   |               |                 |
| 225078_at    | 1.00 | 0.96 | P     | 960.10  | 0.30 | 0.00 | P     | 281.77  | EMP2          | 16p13.2         |
| 200859_x_at  | 1.00 | 0.98 | P     | 4023.77 | 0.30 | 0.00 | P     | 1184.60 | FLNA          | xq28            |
| 228155_at    | 1.00 | 0.99 | P     | 1576.87 | 0.30 | 0.00 | P     | 463.70  | C10orf58      | 10q23.1         |
| 213485_s_at  | 1.00 | 0.99 | P     | 589.30  | 0.30 | 0.00 | P     | 173.70  | ABCC10        | 6p21.1          |
| 227135_at    | 0.97 | 0.89 | P     | 104.13  | 0.30 | 0.02 | A     | 31.07   | ASAH1         | 4q21.1          |
| 243791_at    | 0.99 | 0.94 | P     | 102.80  | 0.30 | 0.00 | A     | 30.37   |               |                 |
| 220174_at    | 1.00 | 0.97 | P     | 219.57  | 0.30 | 0.01 | P     | 65.60   | FLJ23420      | 19p13.3         |
| 214792_x_at  | 0.99 | 0.94 | P     | 193.07  | 0.30 | 0.00 | P     | 56.83   | VAMP2         | 17p13.1         |
| 202738_s_at  | 1.00 | 0.97 | P     | 596.27  | 0.30 | 0.01 | P     | 178.27  | PHKB          | 16q12-q13       |
| 205805_s_at  | 0.99 | 0.93 | P,A   | 91.63   | 0.30 | 0.01 | A     | 27.53   | ROR1          | 1p32-p31        |
| 223519_at    | 0.99 | 0.93 | P     | 991.23  | 0.30 | 0.01 | P     | 294.90  | ZAK           | 2q24.2          |
| 204613_at    | 0.96 | 0.86 | P     | 263.53  | 0.30 | 0.02 | P     | 79.67   | PLCG2         | 16q24.1         |
| 205107_s_at  | 1.00 | 0.98 | P     | 135.67  | 0.30 | 0.00 | P,A   | 40.20   | EFNA4         | 1q21-q22        |
| 205245_at    | 1.00 | 0.97 | P     | 81.70   | 0.30 | 0.00 | P,M   | 24.50   | PARDA6        | 16q22.1         |
| 211732_x_at  | 0.99 | 0.95 | P     | 105.67  | 0.30 | 0.01 | A     | 31.67   | HNMT          | 2q22.1          |
| 226313_at    | 0.99 | 0.93 | P     | 295.97  | 0.30 | 0.01 | P,A   | 88.10   | C10orf35      | 10q22.2         |
| 219439_at    | 0.99 | 0.94 | P     | 536.33  | 0.30 | 0.00 | P     | 160.60  | C1GALT1       | 7p14-p13        |
| 233599_at    | 0.97 | 0.87 | P     | 80.07   | 0.30 | 0.01 | M,A   | 23.97   |               |                 |
| 230820_at    | 0.99 | 0.91 | P     | 197.50  | 0.30 | 0.00 | P     | 59.07   | SMURF2        | 17q22-q23       |
| 229404_at    | 0.99 | 0.95 | P     | 138.40  | 0.30 | 0.00 | M,A   | 41.00   | TWIST2        | 2q37.3          |
| 213657_s_at  | 1.00 | 0.96 | P     | 235.90  | 0.30 | 0.00 | P,A   | 70.60   | DKFZp547K1113 | 15q26.1         |
| 238049_at    | 0.99 | 0.93 | P     | 83.67   | 0.30 | 0.03 | P,A   | 25.63   |               |                 |
| 207732_s_at  | 0.99 | 0.93 | P     | 158.03  | 0.30 | 0.00 | A     | 47.23   | DLG3          | xq13.1          |
| 214519_s_at  | 1.00 | 0.96 | P     | 114.40  | 0.30 | 0.01 | A     | 34.73   | RLN2          | 9p24.1          |
| 226485_at    | 0.99 | 0.92 | P     | 110.87  | 0.30 | 0.01 | A     | 33.63   | FLJ20674      | 12q24.23        |
| 220127_s_at  | 1.00 | 0.99 | P     | 1218.97 | 0.30 | 0.00 | P     | 363.13  | FBXL12        | 19p13.2         |
| 204766_s_at  | 0.99 | 0.95 | P     | 321.47  | 0.30 | 0.01 | P     | 96.70   | NUDT1         | 7p22            |
| 208997_s_at  | 0.98 | 0.90 | P     | 1284.27 | 0.30 | 0.00 | P     | 385.37  | UCP2          | 11q13           |
| 213196_at    | 1.00 | 0.97 | P,M   | 201.27  | 0.30 | 0.02 | A     | 61.80   | ZNF629        | 16p11.2         |
| 224618_at    | 1.00 | 0.96 | P     | 511.47  | 0.30 | 0.00 | P     | 153.03  | ROD1          | 9q33.1          |
| 52285_f_at   | 0.99 | 0.93 | P     | 441.23  | 0.30 | 0.00 | P     | 132.50  | C18orf9       | 18p11.21        |
| 213572_s_at  | 1.00 | 0.97 | P     | 474.33  | 0.30 | 0.00 | P     | 142.63  | SERPIN1       | 6p25            |
| 226511_at    | 0.99 | 0.93 | P     | 659.83  | 0.30 | 0.00 | P     | 198.37  |               |                 |

|              |      |      |       |         |      |      |       |        |               |               |
|--------------|------|------|-------|---------|------|------|-------|--------|---------------|---------------|
| 206558_at    | 1.00 | 0.99 | P,A   | 101.70  | 0.30 | 0.02 | A     | 31.27  | SIM2          | 21q22.13      |
| 1557938_s_at | 1.00 | 0.97 | P     | 393.73  | 0.30 | 0.00 | P,A   | 118.07 |               |               |
| 211200_s_at  | 0.99 | 0.94 | P     | 87.47   | 0.31 | 0.02 | P     | 26.87  |               |               |
| 54970_at     | 0.97 | 0.87 | P     | 1143.40 | 0.31 | 0.00 | P     | 340.97 | DKFZp761l2123 | 7p13          |
| 207159_x_at  | 1.00 | 0.98 | P     | 164.27  | 0.31 | 0.00 | M,A   | 49.53  | MECT1         | 19p13.11      |
| 203067_at    | 1.00 | 0.95 | P     | 1780.20 | 0.31 | 0.00 | P     | 536.63 | PDHX          | 11p13         |
| 231399_at    | 1.00 | 0.98 | P     | 55.73   | 0.31 | 0.01 | A     | 17.07  |               |               |
| 205917_at    | 1.00 | 0.97 | P     | 384.73  | 0.31 | 0.00 | P     | 115.67 | ZNF264        | 19q13.4       |
| 225807_at    | 1.00 | 0.98 | P     | 81.37   | 0.31 | 0.00 | P     | 24.50  | JUB           | 14q11.2       |
| 219241_x_at  | 1.00 | 0.99 | P,A   | 355.60  | 0.31 | 0.00 | A     | 107.97 | SSH-3         | 11q13.1       |
| 236451_at    | 0.98 | 0.89 | P     | 18.63   | 0.31 | 0.01 | A     | 5.77   |               |               |
| 205037_at    | 1.00 | 0.96 | P     | 325.23  | 0.31 | 0.00 | P     | 97.90  | RABL4         | 22q13.1       |
| 218387_s_at  | 1.00 | 0.98 | P     | 1563.67 | 0.31 | 0.00 | P     | 472.40 | PGLS          | 19p13.2       |
| 1553023_a_at | 0.99 | 0.92 | P     | 102.13  | 0.31 | 0.00 | P,M   | 31.07  | NOX5          | 15q22.31      |
| 211695_x_at  | 0.99 | 0.91 | P     | 147.57  | 0.31 | 0.01 | A     | 45.40  | MUC1          | 1q21          |
| 223591_at    | 1.00 | 0.96 | P     | 265.00  | 0.31 | 0.00 | P     | 80.37  | RNF135        | 17q11.2       |
| 209305_s_at  | 0.98 | 0.91 | P     | 166.97  | 0.31 | 0.00 | P,A   | 50.77  | GADD45B       | 19p13.3       |
| 231136_at    | 1.00 | 0.97 | P     | 378.80  | 0.31 | 0.00 | P     | 114.73 |               |               |
| 211033_s_at  | 0.99 | 0.92 | P     | 486.50  | 0.31 | 0.00 | P     | 147.40 | PEX7          | 6q21-q22.2    |
| 1565595_at   | 0.98 | 0.91 | P     | 66.80   | 0.31 | 0.01 | A     | 20.63  |               |               |
| 236685_at    | 0.99 | 0.94 | P     | 129.10  | 0.31 | 0.00 | P,A   | 39.23  |               |               |
| 227352_at    | 1.00 | 0.97 | P     | 250.40  | 0.31 | 0.00 | P     | 75.93  | FLJ35119      | 19p13.2       |
| 204264_at    | 0.98 | 0.91 | P     | 279.93  | 0.31 | 0.02 | P     | 86.53  | CPT2          | 1p32          |
| 243179_at    | 1.00 | 0.96 | P     | 106.60  | 0.31 | 0.01 | M,A   | 32.73  |               |               |
| 202331_at    | 0.99 | 0.95 | P     | 378.13  | 0.31 | 0.00 | M,A   | 114.33 | BCKDHA        | 19q13.1-q13.2 |
| 228920_at    | 1.00 | 0.96 | P     | 431.13  | 0.31 | 0.00 | P     | 130.73 | LOC339324     | 19q13.13      |
| 223167_s_at  | 1.00 | 0.96 | P     | 90.23   | 0.31 | 0.01 | P     | 27.80  | USP25         | 21q11.2       |
| 204922_at    | 0.97 | 0.88 | P     | 111.87  | 0.31 | 0.01 | A     | 34.33  | FLJ22531      | 11q13.1       |
| 244664_at    | 1.00 | 0.99 | P     | 145.83  | 0.31 | 0.00 | A     | 44.73  |               |               |
| 206833_s_at  | 1.00 | 0.95 | P     | 381.60  | 0.31 | 0.01 | P     | 117.13 | ACYP2         | 2p16.2        |
| 203956_at    | 1.00 | 0.99 | P     | 837.87  | 0.31 | 0.01 | P     | 258.27 | ZCWCC1        | 22q12.2       |
| 209865_at    | 1.00 | 0.99 | P     | 293.27  | 0.31 | 0.00 | P     | 89.80  | SLC35A3       | 1p21          |
| 220150_s_at  | 1.00 | 0.97 | P     | 169.80  | 0.31 | 0.02 | A     | 53.40  | C6orf60       | 6q22.31       |
| 1569850_at   | 0.99 | 0.94 | P,A   | 19.80   | 0.31 | 0.03 | A     | 6.23   |               |               |
| 223764_x_at  | 0.99 | 0.93 | P     | 48.67   | 0.31 | 0.02 | A     | 15.37  | NIPSNAP3B     | 9q31.3        |
| 223411_at    | 0.99 | 0.94 | P     | 431.70  | 0.31 | 0.00 | P     | 131.27 | AD023         | 17q25.2       |
| 34726_at     | 0.99 | 0.92 | P     | 131.53  | 0.31 | 0.00 | P     | 40.27  | CACNB3        | 12q13         |
| 40850_at     | 1.00 | 0.96 | P     | 360.80  | 0.31 | 0.01 | A     | 111.23 | FKBP8         | 19p12         |
| 1552628_a_at | 1.00 | 0.96 | P     | 824.63  | 0.31 | 0.00 | P     | 253.13 | FLJ22313      | 7p14.2        |
| 211202_s_at  | 0.99 | 0.95 | P     | 498.63  | 0.31 | 0.00 | P     | 152.93 | JARID1B       | 1q32.1        |
| 204139_x_at  | 0.99 | 0.92 | P,A   | 181.00  | 0.31 | 0.02 | A     | 56.07  | ZNF42         | 19q13.2-q13.4 |
| 239186_at    | 0.99 | 0.92 | P     | 123.63  | 0.31 | 0.02 | A     | 38.87  | MGC39372      | 6p25.2        |
| 1554097_a_at | 0.99 | 0.95 | P     | 208.40  | 0.31 | 0.00 | M,A   | 64.13  |               |               |
| 224808_s_at  | 1.00 | 0.98 | P     | 422.57  | 0.31 | 0.00 | A     | 129.37 | C7orf20       | 7p22.3        |
| 215001_s_at  | 1.00 | 0.98 | P     | 1385.90 | 0.31 | 0.00 | P     | 424.97 | GLUL          | 1q31          |
| 203430_at    | 1.00 | 0.97 | P     | 1770.93 | 0.31 | 0.00 | P     | 546.17 | HEBP2         | 6q24          |
| 202856_s_at  | 1.00 | 0.99 | P     | 68.40   | 0.31 | 0.00 | A     | 20.97  | SLC16A3       | 17q25         |
| 227582_at    | 0.98 | 0.91 | P,M,A | 109.63  | 0.31 | 0.00 | A     | 33.53  | MGC33338      | 1q23.1        |
| 206414_s_at  | 0.99 | 0.93 | P     | 794.77  | 0.31 | 0.00 | P     | 244.87 | DDEF2         | 2p25          |
| 218735_s_at  | 1.00 | 0.96 | P     | 786.57  | 0.31 | 0.01 | P     | 243.40 | ZNF544        | 19q13.43      |
| 239164_at    | 1.00 | 0.95 | P     | 141.07  | 0.31 | 0.00 | P     | 43.43  |               |               |
| 1598_g_at    | 0.99 | 0.95 | P     | 825.73  | 0.31 | 0.00 | A     | 253.57 | GAS6          | 13q34         |
| 226981_at    | 1.00 | 0.97 | P     | 531.73  | 0.31 | 0.01 | P     | 164.23 | MLL           | 11q23         |
| 243521_at    | 1.00 | 0.99 | P     | 67.70   | 0.31 | 0.01 | P     | 21.37  |               |               |
| 216526_x_at  | 1.00 | 1.00 | P     | 2958.73 | 0.31 | 0.00 | P     | 910.73 | HLA-C         | 6p21.3        |
| 203620_s_at  | 0.99 | 0.95 | P,M   | 211.43  | 0.31 | 0.01 | A     | 66.07  | FCHSD2        | 11q13.3       |
| 210502_s_at  | 1.00 | 0.97 | P     | 1133.80 | 0.31 | 0.00 | P     | 350.10 | PPIE          | 1p32          |
| 205896_at    | 1.00 | 0.98 | P,A   | 159.17  | 0.31 | 0.00 | A     | 49.13  | SLC22A4       | 5q31.1        |
| 239336_at    | 0.99 | 0.94 | P     | 38.87   | 0.31 | 0.00 | A     | 12.03  |               |               |
| 1557193_at   | 1.00 | 0.97 | P     | 154.60  | 0.31 | 0.01 | P,A   | 47.83  |               |               |
| 226514_at    | 0.97 | 0.88 | P     | 117.93  | 0.31 | 0.01 | A     | 37.53  | ZNF71         | 19q13.4       |
| 217436_x_at  | 0.98 | 0.91 | P     | 394.50  | 0.31 | 0.01 | P     | 124.03 |               |               |
| 224443_at    | 1.00 | 0.97 | P     | 146.17  | 0.31 | 0.00 | P,A   | 45.57  | MGC14801      | 1q32.3        |
| 238714_at    | 0.99 | 0.95 | P     | 241.40  | 0.31 | 0.01 | P,A   | 75.47  |               |               |
| 207326_at    | 1.00 | 0.97 | P,A   | 20.90   | 0.31 | 0.01 | P,A   | 6.53   | BTC           | 4q13-q21      |
| 228528_at    | 0.99 | 0.93 | P     | 111.57  | 0.32 | 0.01 | P     | 35.00  |               |               |
| 222273_at    | 0.99 | 0.95 | P     | 125.57  | 0.32 | 0.01 | P     | 39.10  |               |               |
| 223361_at    | 1.00 | 0.97 | P     | 2661.60 | 0.32 | 0.00 | P     | 828.87 | C6orf115      | 6q23.3        |
| 238802_at    | 1.00 | 0.96 | P     | 98.27   | 0.32 | 0.02 | A     | 30.97  | TYSDN1        | 10q22.2       |
| 242053_at    | 0.99 | 0.92 | P     | 103.20  | 0.32 | 0.01 | P,A   | 32.20  | TSGA10        | 2q11.2        |
| 206219_s_at  | 1.00 | 0.99 | P     | 107.10  | 0.32 | 0.01 | A     | 33.60  | VAV1          | 19p13.2       |
| 223796_at    | 1.00 | 0.97 | P     | 379.07  | 0.32 | 0.00 | P     | 117.63 | CNTNAP3       | 9p12          |
| 1559993_at   | 0.97 | 0.88 | P     | 138.83  | 0.32 | 0.02 | P     | 44.17  | BA108L7.2     | 10q24.32      |
| 213137_s_at  | 1.00 | 0.96 | P     | 455.47  | 0.32 | 0.00 | P     | 142.00 | PTPN2         | 18p11.3-p11.2 |
| 238738_at    | 1.00 | 0.96 | P     | 87.67   | 0.32 | 0.00 | P,A   | 27.20  | PSMD7         | 16q23-q24     |
| 214086_s_at  | 1.00 | 0.95 | P     | 884.07  | 0.32 | 0.01 | P     | 277.17 | ADPRTL2       | 14q11.2-q12   |
| 235349_at    | 1.00 | 0.97 | P     | 108.70  | 0.32 | 0.02 | P,M   | 34.43  | FLJ32954      | 2p22.3        |
| 202193_at    | 1.00 | 0.97 | P     | 353.20  | 0.32 | 0.00 | P     | 109.90 | LIMK2         | 22q12.2       |
| 203615_x_at  | 1.00 | 0.97 | P     | 636.83  | 0.32 | 0.00 | P     | 200.27 | SULT1A1       | 16p12.1       |
| 65438_at     | 1.00 | 0.97 | P     | 113.53  | 0.32 | 0.00 | P     | 35.50  | KIAA1609      | 16q24.1       |
| 209432_s_at  | 1.00 | 0.99 | P     | 1001.83 | 0.32 | 0.00 | P     | 312.97 | CREB3         | 9pter-p22.1   |
| 220987_s_at  | 0.99 | 0.95 | P     | 223.13  | 0.32 | 0.00 | P     | 69.67  | SNARK         | 1q32.1        |
| 210791_s_at  | 0.99 | 0.92 | P     | 150.80  | 0.32 | 0.01 | A     | 48.27  | RICS          | 11q24-q25     |
| 1556638_at   | 0.99 | 0.92 | P,M   | 149.90  | 0.32 | 0.00 | A     | 47.10  | LOC284530     | 1p36.13       |
| 213853_at    | 1.00 | 0.97 | P     | 826.50  | 0.32 | 0.00 | P     | 260.57 | LOC120526     | 11p14.1       |
| 243016_at    | 1.00 | 0.97 | P     | 166.80  | 0.32 | 0.01 | P     | 52.53  | TYMS          | 18p11.32      |
| 238402_s_at  | 0.99 | 0.93 | P,M   | 150.60  | 0.32 | 0.00 | A     | 47.00  | FLJ35220      | 17q25.3       |
| 235398_at    | 0.99 | 0.91 | P     | 112.17  | 0.32 | 0.01 | P     | 35.33  |               |               |
| 235363_at    | 1.00 | 0.98 | P     | 110.57  | 0.32 | 0.01 | P     | 35.40  |               |               |
| 218412_s_at  | 1.00 | 0.96 | P     | 666.90  | 0.32 | 0.00 | P     | 209.70 | GTF2IRD1      | 7q11.23       |
| 219078_at    | 1.00 | 0.99 | P     | 280.27  | 0.32 | 0.00 | P,M,A | 88.13  | GPATC2        | 1q41          |
| 202321_at    | 0.99 | 0.93 | P     | 167.37  | 0.32 | 0.01 | P     | 52.93  | GGPS1         | 1q43          |
| 213136_at    | 1.00 | 0.95 | P     | 1117.23 | 0.32 | 0.00 | P     | 350.50 | PTPN2         | 18p11.3-p11.2 |
| 225840_at    | 1.00 | 0.95 | P     | 271.10  | 0.32 | 0.01 | P,M   | 85.57  | TEF           | 22q13.2       |
| 226787_at    | 0.99 | 0.92 | P     | 78.83   | 0.32 | 0.01 | A     | 24.93  | ZNF18         | 17p11.2       |
| 51192_at     | 0.99 | 0.95 | P     | 336.73  | 0.32 | 0.00 | P     | 106.47 | SSH-3         | 11q13.1       |

|              |      |      |     |         |      |      |       |         |            |                 |
|--------------|------|------|-----|---------|------|------|-------|---------|------------|-----------------|
| 218371_s_at  | 1.00 | 0.99 | P   | 531.17  | 0.32 | 0.00 | P     | 167.27  | PSPC1      | 13q12.11        |
| 238881_at    | 0.99 | 0.94 | P   | 56.27   | 0.32 | 0.02 | P,M,A | 18.17   |            |                 |
| 202138_x_at  | 1.00 | 0.99 | P   | 2079.73 | 0.32 | 0.01 | P     | 659.17  | JTV1       | 7p22            |
| 223608_at    | 1.00 | 0.96 | P   | 253.50  | 0.32 | 0.00 | P     | 80.17   | MGC12458   | 1q44            |
| 238462_at    | 1.00 | 0.96 | P   | 596.33  | 0.32 | 0.00 | P     | 188.40  | KIAA1959   | 11q24.1         |
| 207128_s_at  | 0.98 | 0.91 | P   | 108.13  | 0.32 | 0.01 | P     | 34.10   | ZNF223     | 19q13.2         |
| 205632_s_at  | 1.00 | 0.98 | P   | 146.83  | 0.32 | 0.00 | A     | 46.67   | PIP5K1B    | 9q13            |
| 232422_at    | 0.99 | 0.92 | P   | 118.67  | 0.32 | 0.00 | A     | 37.93   | LOC87769   | 13q32.3         |
| 204291_at    | 1.00 | 0.98 | P   | 154.00  | 0.32 | 0.01 | P     | 48.93   | ZNF518     | 10q24.1         |
| 210705_s_at  | 1.00 | 0.97 | P   | 266.27  | 0.32 | 0.01 | P     | 84.27   | TRIM5      | 11p15           |
| 204542_at    | 1.00 | 0.97 | P   | 436.27  | 0.32 | 0.01 | P,M   | 139.27  | SIAT7B     | 17q25.3         |
| 230874_at    | 0.98 | 0.89 | P   | 42.73   | 0.32 | 0.01 | P     | 13.70   |            |                 |
| 225774_at    | 0.98 | 0.91 | P   | 536.40  | 0.32 | 0.00 | P     | 171.07  | KIAA1972   | 16q13           |
| 225311_at    | 1.00 | 0.97 | P   | 283.27  | 0.32 | 0.01 | P,M,A | 90.13   | IVD        | 15q14-q15       |
| 217200_x_at  | 1.00 | 0.96 | P   | 784.90  | 0.32 | 0.00 | P     | 249.80  | CYB561     | 17q11-qter      |
| 238712_at    | 1.00 | 0.97 | P   | 74.73   | 0.32 | 0.01 | P,A   | 23.93   |            |                 |
| 213622_at    | 1.00 | 0.95 | P   | 184.23  | 0.32 | 0.00 | P     | 58.90   | COL9A2     | 1p33-p32        |
| 228652_at    | 1.00 | 0.98 | P   | 419.20  | 0.32 | 0.00 | P     | 133.60  | FLJ38288   | 19q13.43        |
| 222891_at    | 1.00 | 0.97 | P   | 550.60  | 0.32 | 0.00 | P     | 175.33  | SLC35B3    | 6p24.3          |
| 225654_at    | 0.99 | 0.93 | P   | 207.90  | 0.32 | 0.01 | P,A   | 66.83   | LOC202347  | 5q35.3          |
| 228208_x_at  | 0.99 | 0.94 | P   | 181.60  | 0.32 | 0.00 | A     | 57.90   | ZNF354C    | 5q35            |
| 202457_s_at  | 0.98 | 0.91 | P   | 755.67  | 0.32 | 0.01 | P     | 243.83  | PPP3CA     | 4q21-q24        |
| 202432_at    | 1.00 | 0.99 | P   | 467.87  | 0.32 | 0.00 | P     | 149.03  | PPP3CB     | 10q21-q22       |
| 203777_s_at  | 0.99 | 0.94 | P   | 409.63  | 0.32 | 0.00 | P     | 130.30  | RPS6KB2    | 11q13.1         |
| 219735_s_at  | 0.99 | 0.93 | P,M | 218.90  | 0.32 | 0.00 | A     | 70.47   | TFCP2L1    | 2q14            |
| 208936_x_at  | 0.97 | 0.88 | P,A | 136.50  | 0.32 | 0.01 | A     | 44.33   | LGALS8     | 1q42-q43        |
| 228289_at    | 1.00 | 0.98 | P   | 302.67  | 0.32 | 0.00 | P     | 96.93   | ADCY7      | 16q12-q13       |
| 223425_at    | 1.00 | 0.98 | P   | 893.33  | 0.32 | 0.00 | P     | 285.93  | RAVER1     | 19p13.2         |
| 224992_s_at  | 0.99 | 0.92 | P   | 425.40  | 0.32 | 0.01 | P     | 136.77  | CMIP       | 16q23           |
| 230733_at    | 0.99 | 0.93 | P   | 332.73  | 0.32 | 0.00 | P     | 106.63  |            |                 |
| 222073_at    | 1.00 | 0.96 | P   | 66.47   | 0.32 | 0.01 | P     | 21.73   | COL4A3     | 2q36-q37        |
| 222737_s_at  | 1.00 | 0.97 | P   | 1340.40 | 0.32 | 0.00 | P     | 429.27  | BRD7       | 16q12           |
| 219603_s_at  | 1.00 | 0.96 | P   | 241.30  | 0.33 | 0.00 | P     | 77.10   | ZNF226     | 19q13.2         |
| 216060_s_at  | 1.00 | 0.96 | P   | 582.90  | 0.33 | 0.00 | P     | 187.07  | DAAM1      | 14q23.1         |
| 228654_at    | 1.00 | 0.97 | P   | 2195.40 | 0.33 | 0.00 | P     | 704.23  | LOC139886  | xq11.2          |
| 220076_at    | 1.00 | 0.96 | P   | 73.03   | 0.33 | 0.01 | A     | 23.50   | ANKH       | 5p15.1          |
| 226962_at    | 1.00 | 0.98 | P   | 611.87  | 0.33 | 0.00 | P     | 196.47  | FRBZ1      | 1q31.3          |
| 209129_at    | 1.00 | 0.99 | P   | 718.07  | 0.33 | 0.00 | P     | 230.17  | TRIP6      | 7q22            |
| 232228_at    | 0.99 | 0.93 | P   | 73.43   | 0.33 | 0.00 | A     | 23.63   | ZNF530     | 19q13.43        |
| 227255_at    | 1.00 | 0.98 | P   | 258.70  | 0.33 | 0.00 | P     | 83.00   | LOC149420  | 1p35.3          |
| 241933_at    | 1.00 | 0.95 | P   | 174.47  | 0.33 | 0.01 | P     | 56.77   | QRSL1      | 6q21            |
| 218377_s_at  | 0.99 | 0.95 | P   | 679.63  | 0.33 | 0.01 | A     | 218.80  | C21orf6    | 21q22.11        |
| 212630_at    | 0.99 | 0.94 | P   | 514.83  | 0.33 | 0.01 | P     | 165.33  | SEC6L1     | 5p15.33         |
| 241410_at    | 0.98 | 0.91 | P   | 77.37   | 0.33 | 0.02 | A     | 25.13   |            |                 |
| 214733_s_at  | 1.00 | 0.99 | P   | 496.70  | 0.33 | 0.01 | P,M,A | 161.07  | DJ167A19.1 | 1p33-p32.1      |
| 203306_s_at  | 1.00 | 0.98 | P   | 1321.53 | 0.33 | 0.00 | P     | 425.23  | SLC35A1    | 6q15            |
| 1558626_at   | 1.00 | 0.95 | P   | 40.30   | 0.33 | 0.01 | A     | 13.03   |            |                 |
| 230643_at    | 1.00 | 0.97 | P   | 44.57   | 0.33 | 0.00 | M,A   | 14.33   | WNT9A      | 1q42            |
| 209061_at    | 1.00 | 0.99 | P   | 299.10  | 0.33 | 0.01 | P     | 96.37   | NCOA3      | 20q12           |
| 201012_at    | 0.99 | 0.92 | P   | 3235.33 | 0.33 | 0.00 | P     | 1044.30 | ANXA1      | 9q12-q21.2      |
| 236476_at    | 1.00 | 0.98 | P   | 314.03  | 0.33 | 0.02 | P     | 102.40  |            |                 |
| 225066_at    | 1.00 | 0.99 | P   | 162.87  | 0.33 | 0.00 | P     | 52.37   | PPP2R2D    | 10q26.3         |
| 226065_at    | 1.00 | 0.96 | P   | 185.77  | 0.33 | 0.01 | A     | 61.17   | PRICKLE1   | 12q12           |
| 229014_at    | 1.00 | 0.99 | P,M | 318.30  | 0.33 | 0.01 | A     | 103.80  |            | 5q15            |
| 224415_s_at  | 1.00 | 0.98 | P   | 2824.43 | 0.33 | 0.00 | P     | 907.57  | HINT2      | 9p13.1          |
| 203771_s_at  | 0.99 | 0.93 | P   | 178.03  | 0.33 | 0.01 | A     | 58.07   | BLVRA      | 7p14-cen        |
| 227616_at    | 0.97 | 0.88 | P   | 480.90  | 0.33 | 0.00 | P,M,A | 154.27  | BCL9L      | 11q23.3         |
| 235538_at    | 1.00 | 0.96 | P   | 141.87  | 0.33 | 0.00 | A     | 45.77   |            |                 |
| 1561720_at   | 0.99 | 0.93 | P   | 22.23   | 0.33 | 0.02 | P,A   | 7.33    |            |                 |
| 201387_s_at  | 1.00 | 0.98 | P,M | 106.77  | 0.33 | 0.02 | A     | 35.50   |            |                 |
| 1557046_x_at | 1.00 | 0.95 | P,A | 28.43   | 0.33 | 0.02 | A     | 9.37    | UCHL1      | 4p14            |
| 223311_s_at  | 1.00 | 0.98 | P   | 344.77  | 0.33 | 0.01 | M,A   | 112.57  | MTA3       | 2p22.1          |
| 228868_x_at  | 0.99 | 0.93 | P   | 975.83  | 0.33 | 0.02 | P     | 320.50  | CDT1       | 16q24.3         |
| 1562259_at   | 1.00 | 0.96 | P   | 64.30   | 0.33 | 0.00 | P     | 20.83   | LOC161577  | 15q21.2         |
| 242343_x_at  | 0.98 | 0.91 | P   | 127.30  | 0.33 | 0.03 | P     | 42.33   |            |                 |
| 225009_at    | 0.99 | 0.92 | P   | 658.13  | 0.33 | 0.00 | P     | 212.10  | CKLFSF4    | 16q22.1         |
| 235559_at    | 0.98 | 0.91 | P   | 143.83  | 0.33 | 0.01 | P,M,A | 46.93   | FLJ22374   | 7p15.1          |
| 225421_at    | 1.00 | 0.98 | P   | 1095.47 | 0.33 | 0.01 | P     | 358.73  | ACY1L2     | 6p16.1          |
| 238773_at    | 1.00 | 0.98 | P   | 569.83  | 0.33 | 0.00 | P     | 184.87  | FLJ33979   | 11p14.1         |
| 202620_s_at  | 1.00 | 0.96 | P   | 1526.13 | 0.33 | 0.00 | P     | 496.10  | PLOD2      | 3q23-q24        |
| 223811_s_at  | 1.00 | 0.99 | P   | 354.97  | 0.33 | 0.01 | P     | 115.77  | C7orf20    | 7p22.3          |
| 238884_at    | 1.00 | 0.97 | P   | 155.10  | 0.33 | 0.02 | P,A   | 51.17   |            |                 |
| 1553613_s_at | 1.00 | 0.97 | P   | 128.40  | 0.33 | 0.00 | P     | 41.67   | FOXC1      | 6p25            |
| 202636_at    | 1.00 | 0.97 | P   | 619.97  | 0.33 | 0.01 | P     | 202.30  | RNF103     | 2p11.2          |
| 219311_at    | 0.99 | 0.94 | P   | 259.03  | 0.33 | 0.01 | A     | 84.73   | C18orf9    | 18p11.21        |
| 225901_at    | 0.99 | 0.95 | P   | 394.17  | 0.33 | 0.01 | P     | 129.03  | LOC114971  | 11p11.2         |
| 214910_s_at  | 1.00 | 0.95 | P   | 208.77  | 0.33 | 0.01 | A     | 68.70   | AFOM       | 6p21.31         |
| 204523_at    | 0.99 | 0.93 | P   | 229.90  | 0.33 | 0.00 | P     | 75.27   | ZNF140     | 12q24.32-q24.33 |
| 219027_s_at  | 1.00 | 0.99 | P,A | 190.83  | 0.33 | 0.01 | A     | 62.67   | MYO9A      | 15q22-q23       |
| 229596_at    | 0.99 | 0.95 | P   | 42.60   | 0.33 | 0.02 | A     | 14.17   | MGC35366   | 12q23.1         |
| 210166_at    | 0.99 | 0.92 | P,A | 111.43  | 0.33 | 0.00 | A     | 36.43   | TLR5       | 1q41-q42        |
| 202053_s_at  | 0.99 | 0.94 | P   | 945.27  | 0.33 | 0.00 | P     | 308.70  | ALDH3A2    | 17p11.2         |
| 227148_at    | 0.99 | 0.92 | P   | 71.83   | 0.33 | 0.01 | P     | 23.80   | KIAA2028   | 2p22.1          |
| 225133_at    | 0.98 | 0.89 | P   | 511.23  | 0.33 | 0.00 | P     | 167.57  | KLF3       | 4p14            |
| 203274_at    | 0.99 | 0.95 | P   | 1678.50 | 0.33 | 0.00 | P     | 548.60  | F8A        | xq28            |
| 238025_at    | 1.00 | 0.98 | P   | 341.27  | 0.33 | 0.00 | P     | 111.40  | FLJ34389   | 16q22.3         |
| 201791_s_at  | 1.00 | 0.99 | P   | 1665.93 | 0.33 | 0.00 | P     | 543.10  | DHCR7      | 11q13.2-q13.5   |
| 223551_at    | 0.99 | 0.93 | P   | 41.20   | 0.33 | 0.02 | P,A   | 13.87   | PKIB       | 6q22.32         |
| 214459_x_at  | 1.00 | 0.97 | P   | 2556.13 | 0.33 | 0.00 | P     | 836.83  | HLA-C      | 6p21.3          |
| 36920_at     | 1.00 | 0.96 | P   | 303.87  | 0.33 | 0.01 | P     | 99.87   | MTM1       | xq28            |
| 225770_at    | 0.99 | 0.92 | P   | 436.40  | 0.33 | 0.01 | P     | 145.00  | KIAA1972   | 16q13           |
| 230556_at    | 1.00 | 0.95 | P   | 358.53  | 0.33 | 0.00 | P     | 117.83  | FLJ25059   | 11p14.1         |
| 205406_s_at  | 1.00 | 0.96 | P   | 133.57  | 0.33 | 0.00 | P     | 43.67   | SPA17      | 11q24.2         |
| 214719_at    | 1.00 | 0.95 | P   | 164.57  | 0.33 | 0.01 | A     | 54.20   | LOC283537  | 13q12.3         |
| 215903_s_at  | 1.00 | 0.95 | P   | 465.33  | 0.33 | 0.01 | P     | 152.63  | MAST2      | 1p34.1          |
| 209716_at    | 0.99 | 0.92 | P,A | 169.40  | 0.33 | 0.00 | P,A   | 55.67   | CSF1       | 1p21-p13        |



|              |      |      |     |         |      |      |       |         |           |                 |
|--------------|------|------|-----|---------|------|------|-------|---------|-----------|-----------------|
| 201287_s_at  | 1.00 | 0.97 | P   | 1583.37 | 0.33 | 0.00 | P     | 519.43  | SDC1      | 2p24.1          |
| 204334_at    | 1.00 | 0.96 | P   | 187.53  | 0.33 | 0.01 | P     | 62.20   | KLF7      | 2q32            |
| 202869_at    | 0.99 | 0.92 | P   | 237.13  | 0.33 | 0.00 | A     | 77.47   | OAS1      | 12q24.1         |
| 201326_at    | 1.00 | 0.99 | P   | 3269.73 | 0.33 | 0.01 | P     | 1079.13 | CCT6A     | 7p11.2          |
| 231736_x_at  | 0.98 | 0.91 | P   | 2497.90 | 0.33 | 0.00 | P     | 829.93  | MGST1     | 12p12.3-p12.1   |
| 222640_at    | 1.00 | 0.96 | P   | 549.80  | 0.33 | 0.00 | A     | 180.33  | DNMT3A    | 2p23            |
| 230083_at    | 0.99 | 0.94 | P   | 187.63  | 0.33 | 0.01 | P     | 61.90   | USP53     | 4q27            |
| 202758_s_at  | 1.00 | 0.95 | P   | 564.60  | 0.33 | 0.00 | P     | 185.50  | RFXKANK   | 19p12           |
| 242562_at    | 1.00 | 0.95 | P   | 88.00   | 0.33 | 0.01 | P     | 29.07   | LOC120526 | 11p14.1         |
| 204453_at    | 1.00 | 0.96 | P   | 165.90  | 0.33 | 0.01 | P     | 55.30   | ZNF84     | 12q24.33        |
| 222804_x_at  | 0.99 | 0.94 | P   | 908.53  | 0.33 | 0.00 | P     | 300.20  | MGC10765  | 9p13.1          |
| 230002_at    | 1.00 | 0.98 | P   | 419.93  | 0.33 | 0.00 | P     | 138.43  | MCLC      | 1p13.3          |
| 221215_s_at  | 1.00 | 0.97 | P   | 1231.37 | 0.34 | 0.00 | P     | 405.97  | ANKRD3    | 21q22.3         |
| 227542_at    | 1.00 | 0.98 | P   | 177.10  | 0.34 | 0.01 | P     | 58.67   |           |                 |
| 207986_x_at  | 1.00 | 0.97 | P   | 400.93  | 0.34 | 0.00 | P     | 132.53  | CYB561    | 17q11-qter      |
| 219916_s_at  | 0.99 | 0.95 | P   | 296.60  | 0.34 | 0.00 | A     | 98.27   | RNF39     | 6p21.3          |
| 219705_at    | 1.00 | 0.98 | P   | 253.37  | 0.34 | 0.00 | P     | 83.67   | FLJ21924  | 11p13           |
| 218634_at    | 1.00 | 0.99 | P   | 212.30  | 0.34 | 0.00 | A     | 70.23   | PHLDA3    | 1q31            |
| 204255_s_at  | 0.99 | 0.94 | P   | 104.07  | 0.34 | 0.01 | P     | 34.80   | VDR       | 12q12-q14       |
| 224747_at    | 1.00 | 0.98 | P   | 721.63  | 0.34 | 0.00 | P     | 239.40  | LOC92912  | 15q23           |
| 202712_s_at  | 1.00 | 0.96 | P   | 612.67  | 0.34 | 0.01 | P     | 203.20  | CKMT1     | 15q15           |
| 233142_at    | 0.98 | 0.90 | P,A | 126.10  | 0.34 | 0.01 | A     | 42.40   |           |                 |
| 229532_at    | 1.00 | 0.98 | P   | 64.53   | 0.34 | 0.01 | A     | 21.80   | ZNF502    | 3p21.32         |
| 233759_s_at  | 1.00 | 0.96 | P   | 752.50  | 0.34 | 0.01 | P     | 250.80  | KIAA1387  | 2p16.2          |
| 229143_at    | 0.99 | 0.92 | P   | 210.80  | 0.34 | 0.01 | P     | 69.93   | CNOT3     | 19q13.4         |
| 1570165_at   | 0.99 | 0.94 | P   | 74.20   | 0.34 | 0.02 | P     | 25.40   |           |                 |
| 224569_s_at  | 1.00 | 0.97 | P   | 2986.30 | 0.34 | 0.00 | P     | 994.07  | IRF2BP2   | 1q42.3          |
| 212415_at    | 1.00 | 0.98 | P   | 267.37  | 0.34 | 0.00 | A     | 89.13   | 6-Sep     | xq25            |
| 202084_s_at  | 0.99 | 0.95 | P   | 965.73  | 0.34 | 0.00 | P     | 322.10  | SEC14L1   | 17q25.1-17q25.2 |
| 211721_s_at  | 1.00 | 0.96 | P   | 265.63  | 0.34 | 0.01 | P     | 89.33   | ZNF551    | 19q13.43        |
| 1556160_a_at | 1.00 | 0.95 | P   | 75.40   | 0.34 | 0.01 | A     | 25.63   |           |                 |
| 202449_s_at  | 0.99 | 0.92 | P   | 443.23  | 0.34 | 0.00 | P     | 147.47  | RXRA      | 9q34.3          |
| 211924_s_at  | 0.99 | 0.93 | P   | 199.63  | 0.34 | 0.01 | A     | 67.87   | PLAUR     | 19q13           |
| 1555136_at   | 0.99 | 0.94 | P   | 35.47   | 0.34 | 0.01 | A     | 11.93   | FGD6      | 12q23.1         |
| 205251_at    | 1.00 | 0.96 | P   | 299.03  | 0.34 | 0.01 | P     | 100.63  | PER2      | 2q37.3          |
| 225698_at    | 1.00 | 0.96 | P   | 924.83  | 0.34 | 0.00 | P     | 309.00  | TIGA1     | 5q21-q22        |
| 214639_s_at  | 0.99 | 0.93 | P,A | 130.77  | 0.34 | 0.00 | A     | 44.17   | HOXA1     | 7p15.3          |
| 227234_at    | 0.99 | 0.94 | P   | 92.67   | 0.34 | 0.02 | A     | 31.53   |           |                 |
| 222408_s_at  | 1.00 | 0.97 | P   | 504.80  | 0.34 | 0.00 | P     | 169.37  | CGI-127   | 2p23.3          |
| 223575_at    | 0.99 | 0.93 | P   | 182.93  | 0.34 | 0.01 | P     | 61.70   | KIAA1549  | 7q34            |
| 209210_s_at  | 1.00 | 0.98 | P   | 976.97  | 0.34 | 0.00 | P     | 327.50  | PLEKHC1   | 14q22.1         |
| 216836_s_at  | 1.00 | 0.97 | P   | 221.90  | 0.34 | 0.01 | M,A   | 75.37   | ERBB2     | 17q21.1         |
| 235581_at    | 1.00 | 0.96 | P   | 106.23  | 0.34 | 0.01 | P     | 36.37   |           |                 |
| 202927_at    | 1.00 | 0.98 | P   | 993.87  | 0.34 | 0.01 | P     | 335.50  | PIN1      | 19p13           |
| 229272_at    | 0.98 | 0.90 | P   | 233.87  | 0.34 | 0.00 | M,A   | 78.77   | FBNP4     | 11p11.2-p11.12  |
| 201333_s_at  | 1.00 | 0.98 | P   | 238.43  | 0.34 | 0.01 | A     | 81.07   | ARHGFE12  | 11q23.3         |
| 213593_s_at  | 0.99 | 0.92 | P   | 194.93  | 0.34 | 0.02 | P,A   | 66.23   | TRA2A     | 7p15.3          |
| 239679_at    | 0.99 | 0.94 | P   | 97.07   | 0.34 | 0.00 | P     | 32.60   |           |                 |
| 225662_at    | 1.00 | 0.97 | P   | 818.57  | 0.34 | 0.00 | P     | 275.53  | ZAK       | 2q24.2          |
| 212074_at    | 1.00 | 0.95 | P   | 1391.23 | 0.34 | 0.00 | P     | 469.90  | UNC84A    | 7p22.3          |
| 239848_at    | 1.00 | 0.97 | P   | 144.33  | 0.34 | 0.02 | P,A   | 49.20   |           |                 |
| 221599_at    | 0.99 | 0.94 | P   | 208.77  | 0.34 | 0.02 | P,M,A | 71.23   | PTD015    | 11q13.4         |
| 1560089_at   | 0.98 | 0.91 | P   | 131.97  | 0.34 | 0.03 | A     | 45.27   | LOC286208 | 9q34.13         |
| 225002_s_at  | 1.00 | 0.99 | P   | 625.47  | 0.34 | 0.00 | P     | 210.90  | SUMF2     | 7q11.1          |
| 225773_at    | 1.00 | 0.99 | P   | 607.57  | 0.34 | 0.00 | P     | 205.27  | KIAA1972  | 16q13           |
| 214239_x_at  | 1.00 | 0.96 | P   | 512.70  | 0.34 | 0.01 | P     | 173.17  | RNF110    | 17q21.2         |
| 221931_s_at  | 1.00 | 0.98 | P   | 2372.07 | 0.34 | 0.00 | P     | 801.73  | SEC13L    | 18p11.21        |
| 224570_s_at  | 1.00 | 0.99 | P   | 1255.03 | 0.34 | 0.00 | P     | 424.90  | IRF2BP2   | 1q42.3          |
| 221493_at    | 1.00 | 0.99 | P   | 1877.50 | 0.34 | 0.00 | P     | 633.90  | TSPYL1    | 6q22-q23        |
| 227979_at    | 0.99 | 0.95 | P   | 519.70  | 0.34 | 0.01 | P     | 175.83  | MGC10871  | 11q13           |
| 240910_at    | 0.99 | 0.95 | P,M | 102.23  | 0.34 | 0.01 | A     | 35.03   |           |                 |
| 227465_at    | 1.00 | 0.99 | P   | 410.60  | 0.34 | 0.00 | P     | 138.97  | KIAA0892  | 19p13.11        |
| 233461_x_at  | 0.99 | 0.94 | P   | 139.53  | 0.34 | 0.00 | P     | 47.20   | ZNF226    | 19q13.2         |
| 209632_at    | 0.97 | 0.87 | P   | 298.67  | 0.34 | 0.01 | P     | 102.47  | PPP2R3A   | 3q22.1          |
| 219076_s_at  | 1.00 | 0.99 | P   | 367.37  | 0.34 | 0.01 | A     | 126.63  | PXMP2     | 12q24.33        |
| 204034_at    | 1.00 | 0.98 | P   | 1187.53 | 0.34 | 0.00 | P     | 407.17  | ETHE1     | 19q13.32        |
| 224839_s_at  | 0.99 | 0.92 | P   | 617.53  | 0.35 | 0.03 | P     | 214.43  | GPT2      | 16q12.1         |
| 32094_at     | 1.00 | 0.97 | P   | 266.23  | 0.35 | 0.01 | P     | 90.70   | CHST3     | 10q22.2         |
| 236078_at    | 0.99 | 0.92 | P   | 67.40   | 0.35 | 0.02 | M,A   | 23.13   |           |                 |
| 229537_at    | 0.99 | 0.95 | P,A | 69.40   | 0.35 | 0.00 | A     | 23.67   | LMO4      | 1p22.3          |
| 203740_at    | 0.99 | 0.94 | P   | 1614.53 | 0.35 | 0.00 | P     | 550.97  | MPHOSPH6  | 16q23.3         |
| 212099_at    | 0.99 | 0.95 | P   | 1230.10 | 0.35 | 0.00 | P     | 420.13  | RHOB      | 2p24            |
| 204290_s_at  | 0.99 | 0.94 | P   | 173.00  | 0.35 | 0.01 | A     | 59.53   | ALDH6A1   | 14q24.3         |
| 211729_x_at  | 1.00 | 0.99 | P   | 1113.43 | 0.35 | 0.00 | P     | 379.57  | BLVRA     | 7p14-cen        |
| 208107_s_at  | 0.99 | 0.95 | P   | 287.67  | 0.35 | 0.01 | P,A   | 98.10   | LOC81691  | 16p13.11        |
| 212778_at    | 1.00 | 0.96 | P,M | 270.33  | 0.35 | 0.01 | A     | 92.43   | KIAA0602  | 14q32.33        |
| 219127_at    | 1.00 | 0.99 | P   | 114.47  | 0.35 | 0.02 | A     | 40.13   | MGC11242  | 17q21.32        |
| 201327_s_at  | 1.00 | 0.96 | P   | 4824.57 | 0.35 | 0.00 | P     | 1650.47 | CCT6A     | 7p11.2          |
| 235896_s_at  | 1.00 | 0.96 | P   | 128.07  | 0.35 | 0.00 | P,A   | 43.63   | SMCR7     | 17p11.2         |
| 228466_at    | 1.00 | 0.96 | P   | 263.40  | 0.35 | 0.01 | A     | 91.30   |           |                 |
| 202494_at    | 1.00 | 0.97 | P   | 481.37  | 0.35 | 0.00 | P     | 164.10  | PIIE      | 1p32            |
| 226451_at    | 1.00 | 0.97 | P   | 994.70  | 0.35 | 0.00 | P     | 341.40  | MGC19604  | 19p13.2         |
| 210346_s_at  | 1.00 | 1.00 | P   | 543.67  | 0.35 | 0.01 | P     | 186.73  | CLK1      | 2q33            |
| 236150_at    | 1.00 | 0.99 | P   | 144.30  | 0.35 | 0.00 | A     | 49.50   |           | 15q24.1         |
| 208581_x_at  | 0.99 | 0.95 | P   | 3121.77 | 0.35 | 0.00 | P     | 1072.87 | MT1X      | 16q13           |
| 220968_s_at  | 0.99 | 0.95 | P   | 217.10  | 0.35 | 0.00 | P,A   | 74.57   | PP1057    | 12p13.3         |
| 232231_at    | 1.00 | 0.99 | P   | 178.57  | 0.35 | 0.00 | P     | 61.27   |           |                 |
| 1555762_s_at | 1.00 | 0.97 | P   | 403.87  | 0.35 | 0.01 | P     | 139.50  | RBM15     | 1p13            |
| 213281_at    | 0.97 | 0.89 | P   | 121.73  | 0.35 | 0.00 | P     | 41.73   | JUN       | 1p32-p31        |
| 218011_at    | 1.00 | 0.97 | P   | 3256.83 | 0.35 | 0.00 | P     | 1119.03 | UBL5      | 19p13.3         |
| 1557128_at   | 0.99 | 0.94 | P   | 233.33  | 0.35 | 0.01 | M,A   | 80.63   | CANP      | 11q12.2         |
| 227776_at    | 1.00 | 0.96 | P   | 892.03  | 0.35 | 0.01 | P     | 307.50  |           |                 |
| 229654_at    | 0.99 | 0.95 | P,A | 188.27  | 0.35 | 0.00 | A     | 64.93   | ZNF44     | 19p13.2         |
| 211423_s_at  | 0.99 | 0.95 | P   | 1934.77 | 0.35 | 0.00 | P     | 667.63  | SC5DL     | 11q23.3         |
| 222810_s_at  | 1.00 | 0.97 | P,A | 507.23  | 0.35 | 0.00 | A     | 174.67  | RASAL2    | 1q24            |
| 231872_at    | 0.99 | 0.93 | P   | 91.07   | 0.35 | 0.00 | P,M   | 31.37   | KIAA1764  | 8q21.13-q21.2   |

|              |      |      |       |         |      |      |       |         |               |                |
|--------------|------|------|-------|---------|------|------|-------|---------|---------------|----------------|
| 212080_at    | 1.00 | 0.96 | P     | 479.80  | 0.35 | 0.00 | M,A   | 165.03  | MLL           | 11q23          |
| 202597_at    | 1.00 | 0.96 | P     | 268.80  | 0.35 | 0.02 | A     | 94.90   | IRF6          | 1q32.3-q41     |
| 238021_s_at  | 1.00 | 0.98 | P     | 3098.93 | 0.35 | 0.00 | P     | 1068.67 |               | 16q12.2        |
| 1561749_at   | 1.00 | 0.97 | P     | 185.77  | 0.35 | 0.02 | P     | 65.87   |               |                |
| 217824_at    | 0.98 | 0.91 | P     | 203.17  | 0.35 | 0.01 | P     | 70.97   | UBE2J1        | 6q16.1         |
| 219848_s_at  | 1.00 | 0.95 | P     | 191.03  | 0.35 | 0.01 | P     | 66.07   | ZNF432        | 19q13.41       |
| 229130_at    | 0.99 | 0.93 | P,M   | 86.33   | 0.35 | 0.03 | A     | 30.53   | LOC285535     | 4p16.1         |
| 214093_s_at  | 1.00 | 0.97 | P     | 371.07  | 0.35 | 0.00 | P     | 128.37  | NEXN          | 1p31.1         |
| 229732_at    | 1.00 | 0.98 | P     | 169.47  | 0.35 | 0.01 | P     | 58.90   | HSZFP36       | 19p13.2        |
| 239726_at    | 1.00 | 0.99 | P     | 91.77   | 0.35 | 0.00 | P     | 31.73   | ANK3          | 10q21          |
| 202387_at    | 1.00 | 0.98 | P     | 983.03  | 0.35 | 0.00 | P     | 339.63  | BAG1          | 9p12           |
| 209431_s_at  | 0.99 | 0.95 | P     | 124.03  | 0.35 | 0.02 | A     | 43.43   | ZNF278        | 22q12.2        |
| 243309_at    | 1.00 | 0.97 | P     | 144.33  | 0.35 | 0.00 | P     | 49.93   |               | 15q21.1        |
| 226265_at    | 1.00 | 0.99 | P     | 2622.33 | 0.35 | 0.00 | P     | 906.77  | FLJ21924      | 11p13          |
| 229202_at    | 0.99 | 0.94 | P     | 156.17  | 0.35 | 0.00 | P,M   | 54.23   | FLJ11383      | 1q42.2         |
| 211846_s_at  | 1.00 | 1.00 | P     | 90.17   | 0.35 | 0.01 | M,A   | 31.73   | PVRL1         | 11q23          |
| 212332_at    | 0.99 | 0.92 | P,M   | 213.40  | 0.35 | 0.00 | P,A   | 74.20   | RBL2          | 16q12.2        |
| 228006_at    | 1.00 | 0.95 | P     | 229.30  | 0.35 | 0.00 | P     | 79.50   | PTEN          | 10q23.3        |
| 221710_x_at  | 0.99 | 0.93 | P,A   | 61.00   | 0.35 | 0.03 | A     | 21.87   | FLJ10647      | 1p34.3         |
| 230660_at    | 0.99 | 0.93 | P     | 346.27  | 0.35 | 0.00 | P,A   | 119.83  | SERTAD4       | 1q32.1-q41     |
| 229574_at    | 0.99 | 0.92 | P     | 93.20   | 0.35 | 0.03 | A     | 33.30   | TRAZA         | 7p15.3         |
| 239449_at    | 0.99 | 0.93 | P,A   | 39.90   | 0.35 | 0.01 | A     | 14.03   |               |                |
| 219174_at    | 0.99 | 0.92 | P     | 91.37   | 0.35 | 0.02 | P     | 32.17   | CCDC2         | 9p21.1         |
| 210609_s_at  | 1.00 | 0.96 | P     | 414.10  | 0.35 | 0.00 | A     | 144.53  | TP53I3        | 2p24.1         |
| 209194_at    | 1.00 | 0.97 | P     | 1348.27 | 0.35 | 0.00 | P     | 468.87  | CETN2         | xq28           |
| 210224_at    | 0.99 | 0.93 | P,M,A | 114.27  | 0.35 | 0.00 | A     | 39.97   | MR1           | 1q25.3         |
| 226408_at    | 1.00 | 0.96 | P     | 291.07  | 0.35 | 0.00 | P,M   | 101.40  | TEAD2         | 19q13.3        |
| 237942_at    | 0.99 | 0.94 | P     | 51.40   | 0.35 | 0.01 | A     | 17.93   | SNRK          | 3p21.32        |
| 206307_s_at  | 1.00 | 0.97 | P     | 249.43  | 0.35 | 0.00 | P     | 86.90   | FOXO1         | 5q12-q13       |
| 231960_at    | 1.00 | 0.97 | P     | 113.00  | 0.35 | 0.01 | P     | 39.63   | C21orf107     | 21q22.2        |
| 238510_at    | 0.99 | 0.94 | P     | 195.17  | 0.35 | 0.01 | P,M,A | 68.00   | LOC124411     | 16p11.2        |
| 203347_s_at  | 0.98 | 0.91 | P     | 256.90  | 0.35 | 0.00 | P     | 89.90   | M96           | p22.1          |
| 224082_at    | 0.99 | 0.93 | P,A   | 55.00   | 0.35 | 0.01 | A     | 19.33   |               |                |
| 213746_s_at  | 0.99 | 0.95 | P     | 2357.97 | 0.35 | 0.01 | P     | 827.83  | FLNA          | xq28           |
| 219058_x_at  | 0.98 | 0.89 | P,A   | 105.17  | 0.35 | 0.02 | A     | 37.77   | LCN7          | 1p35.1         |
| 240421_x_at  | 1.00 | 0.96 | P     | 156.60  | 0.35 | 0.01 | P     | 54.73   |               | 4q31.1         |
| 201064_s_at  | 0.99 | 0.94 | P     | 2815.53 | 0.35 | 0.00 | P     | 985.67  | PABPC4        | 1p32-p36       |
| 224918_x_at  | 0.99 | 0.94 | P     | 2722.33 | 0.36 | 0.00 | P     | 960.23  | MGST1         | 12p12.3-p12.1  |
| 242196_at    | 0.99 | 0.95 | P     | 109.77  | 0.36 | 0.00 | P,M,A | 38.43   | RICS          | 11q24-q25      |
| 210172_at    | 1.00 | 0.96 | P     | 522.60  | 0.36 | 0.01 | P     | 184.07  | SF1           | 11q13          |
| 201830_s_at  | 0.99 | 0.92 | P     | 869.13  | 0.36 | 0.01 | P     | 307.63  | NET1          | 10p15          |
| 223599_at    | 1.00 | 0.97 | P     | 224.67  | 0.36 | 0.01 | P     | 79.13   | TRIM6         | 11p15.4        |
| 231727_s_at  | 0.99 | 0.93 | P     | 340.90  | 0.36 | 0.00 | P     | 120.60  | AD023         | 17q25.2        |
| 211168_s_at  | 1.00 | 0.98 | P     | 695.43  | 0.36 | 0.00 | P     | 243.90  | RENT1         | 19p13.2-p13.11 |
| 235612_at    | 1.00 | 1.00 | P     | 209.00  | 0.36 | 0.00 | P     | 73.33   |               |                |
| 241827_at    | 1.00 | 0.97 | P     | 143.30  | 0.36 | 0.02 | P,A   | 51.43   | ZNF615        | 19q13.41       |
| 219495_s_at  | 1.00 | 0.96 | P     | 179.73  | 0.36 | 0.01 | P,A   | 63.47   | ZNF180        | 19q13.2        |
| 232696_at    | 1.00 | 0.98 | P     | 67.63   | 0.36 | 0.02 | P     | 24.13   |               |                |
| 224912_at    | 0.99 | 0.94 | P     | 126.87  | 0.36 | 0.01 | P,A   | 44.63   | TTC7          | 2p21           |
| 225023_at    | 0.97 | 0.88 | P     | 339.50  | 0.36 | 0.01 | P     | 121.03  | GOPC          | 6q21           |
| 226473_at    | 0.99 | 0.92 | P     | 481.20  | 0.36 | 0.00 | P     | 168.90  | CBX2          | 17q25.3        |
| 218435_at    | 1.00 | 0.97 | P     | 1588.10 | 0.36 | 0.00 | P     | 559.27  | DNAJD1        | 13q14.1        |
| 223455_at    | 0.99 | 0.94 | P     | 659.50  | 0.36 | 0.00 | P     | 232.33  | MGC10854      | 12q24.12       |
| 224467_s_at  | 1.00 | 0.97 | P     | 604.53  | 0.36 | 0.00 | P     | 213.13  | MGC13096      | 19q13.12       |
| 227208_at    | 1.00 | 0.98 | P     | 394.77  | 0.36 | 0.00 | P     | 139.07  | DLNB14        | 11q23.3        |
| 213396_s_at  | 0.99 | 0.94 | P     | 203.40  | 0.36 | 0.01 | P     | 72.73   | AKAP10        | 17p11.1        |
| 238597_at    | 1.00 | 0.97 | P     | 106.43  | 0.36 | 0.01 | P     | 37.67   | DKFZP566D1346 | 1p32.3-p31.3   |
| 1557684_at   | 1.00 | 0.96 | P     | 116.77  | 0.36 | 0.02 | P     | 42.27   | ZNF286        | 17p11.2        |
| 232156_at    | 1.00 | 0.98 | P     | 127.40  | 0.36 | 0.01 | P     | 45.13   | CMYA5         | 5q14.1         |
| 204806_x_at  | 0.99 | 0.95 | P     | 767.27  | 0.36 | 0.00 | P     | 271.27  | HLA-F         | 6p21.3         |
| 221875_x_at  | 1.00 | 0.97 | P     | 1089.10 | 0.36 | 0.00 | P     | 384.17  | HLA-F         | 6p21.3         |
| 226994_at    | 1.00 | 0.99 | P     | 934.37  | 0.36 | 0.00 | P     | 330.07  | DNAJA2        | 16q11.1-q11.2  |
| 228739_at    | 1.00 | 0.96 | P     | 39.50   | 0.36 | 0.02 | A     | 14.23   |               |                |
| 221776_s_at  | 1.00 | 0.96 | P     | 1195.80 | 0.36 | 0.00 | P     | 423.77  | BRD7          | 16q12          |
| 234937_x_at  | 0.98 | 0.90 | P     | 95.20   | 0.36 | 0.00 | A     | 33.87   | ZFP28         | 19q13.43       |
| 213718_at    | 0.99 | 0.93 | P     | 102.40  | 0.36 | 0.02 | P,A   | 36.70   | RBM4          | 11q13          |
| 207153_s_at  | 1.00 | 0.98 | P     | 316.50  | 0.36 | 0.00 | P     | 112.27  | GLMN          | 1p22.1         |
| 212221_x_at  | 1.00 | 0.99 | P     | 1245.57 | 0.36 | 0.00 | P     | 441.30  | IDS           | xq28           |
| 227083_at    | 1.00 | 0.98 | P     | 152.73  | 0.36 | 0.01 | P     | 54.63   | B3GTL         | 13q12.3        |
| 234192_s_at  | 0.98 | 0.90 | P     | 93.23   | 0.36 | 0.03 | P     | 33.97   | GKAP1         | 9q22.1         |
| 208988_at    | 0.99 | 0.95 | P     | 665.53  | 0.36 | 0.02 | P     | 238.40  | FBXL11        | 11q13.1        |
| 1557116_at   | 1.00 | 0.98 | P     | 244.47  | 0.36 | 0.01 | P     | 88.20   |               |                |
| 224361_s_at  | 0.98 | 0.91 | P     | 106.53  | 0.36 | 0.00 | A     | 38.00   | IL17RB        | 3p21.1         |
| 203439_s_at  | 1.00 | 0.97 | P     | 120.87  | 0.36 | 0.01 | P     | 43.17   | STC2          | 5q35.2         |
| 212463_at    | 1.00 | 0.97 | P     | 1228.50 | 0.36 | 0.01 | P     | 437.90  | CD59          | 11p13          |
| 230516_at    | 1.00 | 0.96 | P     | 51.40   | 0.36 | 0.01 | P,M,A | 18.57   | C7orf30       | 7p15.3         |
| 205380_at    | 1.00 | 0.96 | P,A   | 39.63   | 0.36 | 0.00 | A     | 14.07   | PDZK1         | 1q21           |
| 214752_x_at  | 1.00 | 0.98 | P     | 2613.63 | 0.36 | 0.00 | P     | 930.23  | FLNA          | xq28           |
| 211996_at    | 0.99 | 0.95 | P     | 608.80  | 0.36 | 0.00 | P     | 216.27  | H3F3B         | 17q25          |
| 204282_s_at  | 0.98 | 0.90 | P     | 338.40  | 0.36 | 0.01 | P     | 120.53  | FARS1         | 6p25.1         |
| 211138_s_at  | 1.00 | 0.96 | P     | 187.73  | 0.36 | 0.01 | M,A   | 67.60   | KMO           | 1q42-q44       |
| 1557270_at   | 1.00 | 0.96 | P     | 279.17  | 0.36 | 0.02 | P     | 101.23  |               |                |
| 205682_x_at  | 1.00 | 0.95 | P     | 268.17  | 0.36 | 0.00 | P     | 95.40   | APOM          | 6p21.31        |
| 204800_s_at  | 0.99 | 0.94 | P     | 133.23  | 0.36 | 0.00 | M,A   | 47.77   | FLJ13639      | 13q14.2        |
| 1552643_at   | 0.99 | 0.94 | P,M   | 118.70  | 0.36 | 0.01 | A     | 43.07   | ZNF626        | 19p13.11       |
| 37590_g_at   | 1.00 | 0.98 | P     | 158.30  | 0.36 | 0.01 | A     | 57.07   | DKFZp547K1113 | 15q26.1        |
| 202049_s_at  | 1.00 | 0.96 | P     | 365.10  | 0.36 | 0.01 | P     | 131.33  | ZNF262        | 1p32-p34       |
| 206959_s_at  | 0.98 | 0.90 | P     | 188.43  | 0.36 | 0.01 | P     | 67.70   | UPF3A         | 13q34          |
| 227726_at    | 0.99 | 0.94 | P     | 255.50  | 0.36 | 0.00 | P     | 91.40   | MGC2647       | 16q24.3        |
| 219860_at    | 0.99 | 0.92 | P     | 95.97   | 0.36 | 0.00 | M,A   | 34.13   | LY6G5C        | 6p21.31        |
| 235716_at    | 0.99 | 0.93 | P     | 259.27  | 0.36 | 0.02 | P     | 94.57   |               |                |
| 1563549_a_at | 1.00 | 0.97 | P,A   | 310.83  | 0.36 | 0.00 | A     | 110.97  | KIAA1623      | 19p13.12       |
| 235414_at    | 0.98 | 0.91 | P,A   | 63.63   | 0.36 | 0.03 | A     | 23.67   | ZNF383        | 19q13.13       |
| 1555559_s_at | 0.99 | 0.92 | P,A   | 37.43   | 0.36 | 0.02 | P,A   | 13.67   | USP25         | 21q11.2        |
| 205797_s_at  | 0.98 | 0.89 | P,A   | 85.90   | 0.36 | 0.03 | A     | 31.57   | FLJ11336      | 11p13          |
| 226990_at    | 1.00 | 0.96 | P     | 1122.37 | 0.36 | 0.00 | P     | 401.80  | M11S1         | 11p13          |

|              |      |      |       |         |      |      |       |         |           |               |
|--------------|------|------|-------|---------|------|------|-------|---------|-----------|---------------|
| 202085_at    | 1.00 | 1.00 | P     | 911.97  | 0.36 | 0.00 | P     | 327.07  | TJP2      | 9q13-q21      |
| 209751_s_at  | 1.00 | 0.97 | P     | 593.27  | 0.36 | 0.00 | P     | 212.53  | SEDLP     | 19q13.4       |
| 205443_at    | 0.99 | 0.93 | P     | 385.93  | 0.36 | 0.02 | P     | 140.67  | SNAPC1    | 14q22         |
| 226021_at    | 0.98 | 0.91 | P     | 582.17  | 0.36 | 0.00 | P     | 209.17  | RDH10     | 8q13.3        |
| 242708_at    | 0.98 | 0.91 | P     | 32.80   | 0.36 | 0.01 | M,A   | 11.87   | PEX1      | 7q21-q22      |
| 219680_at    | 1.00 | 0.96 | P,A   | 278.00  | 0.36 | 0.00 | A     | 99.57   | NOD9      | 11q23.3       |
| 244677_at    | 0.98 | 0.90 | P     | 74.00   | 0.36 | 0.02 | P,A   | 26.87   | PER1      | 17p13.1-17p12 |
| 229741_at    | 1.00 | 0.99 | P     | 177.47  | 0.36 | 0.00 | P     | 63.50   |           |               |
| 226346_at    | 1.00 | 0.97 | P     | 150.67  | 0.36 | 0.00 | P     | 54.03   |           |               |
| 205290_s_at  | 0.98 | 0.91 | P,A   | 59.73   | 0.36 | 0.00 | A     | 21.50   | BMP2      | 20p12         |
| 205323_s_at  | 1.00 | 0.97 | P     | 286.47  | 0.36 | 0.01 | P     | 103.63  | MTF1      | 1p33          |
| 232968_at    | 0.99 | 0.92 | P,M   | 67.90   | 0.36 | 0.01 | A     | 24.57   | FANK1     | 10q26.2       |
| 202093_s_at  | 0.98 | 0.90 | P     | 405.13  | 0.37 | 0.01 | P     | 145.90  | PD2       | 19q13.1       |
| 1564190_x_at | 1.00 | 0.97 | P     | 112.13  | 0.37 | 0.02 | A     | 41.03   | ZNF519    | 18p11.21      |
| 227179_at    | 1.00 | 0.99 | P     | 144.10  | 0.37 | 0.02 | P,M   | 52.30   | STAU2     | 8q13-q21.1    |
| 212609_s_at  | 1.00 | 0.96 | P     | 251.17  | 0.37 | 0.00 | P     | 90.40   | SDCCAG8   | 1q43-q44      |
| 222028_at    | 1.00 | 0.99 | P     | 332.13  | 0.37 | 0.00 | P     | 119.70  | ZNF45     | 19q13.2       |
| 213927_at    | 1.00 | 1.00 | P     | 341.70  | 0.37 | 0.00 | P     | 123.23  |           |               |
| 238593_at    | 1.00 | 0.98 | P     | 153.60  | 0.37 | 0.00 | P     | 55.40   | FLJ22531  | 11q13.1       |
| 39650_s_at   | 1.00 | 0.97 | P     | 101.93  | 0.37 | 0.01 | P     | 36.90   | FLJ11383  | 1q42.2        |
| 1557224_at   | 1.00 | 0.96 | P     | 123.40  | 0.37 | 0.02 | P     | 44.93   |           |               |
| 226793_at    | 0.99 | 0.93 | P,A   | 580.30  | 0.37 | 0.01 | A     | 210.77  | LOC283267 | 11p13         |
| 242028_at    | 0.99 | 0.94 | P     | 72.93   | 0.37 | 0.02 | P,A   | 26.87   | FLJ38281  | 19p13.2       |
| 231055_at    | 1.00 | 0.98 | P     | 94.93   | 0.37 | 0.01 | P     | 34.77   |           |               |
| 212197_x_at  | 1.00 | 0.95 | P     | 1106.33 | 0.37 | 0.00 | P     | 399.27  | M-RIP     | 17p11.2       |
| 1558529_s_at | 1.00 | 0.95 | P     | 143.00  | 0.37 | 0.00 | P,A   | 51.70   |           | 8p23.3        |
| 202883_s_at  | 1.00 | 1.00 | P     | 644.67  | 0.37 | 0.00 | P     | 234.10  | PPP2R1B   | 11q23.2       |
| 205248_at    | 1.00 | 0.98 | P     | 246.97  | 0.37 | 0.01 | P     | 90.13   | C21orf5   | 21q22.2       |
| 226696_at    | 1.00 | 0.97 | P     | 471.70  | 0.37 | 0.00 | P     | 170.40  | RBBP9     | 20p11.2       |
| 1438_at      | 0.99 | 0.92 | P     | 200.87  | 0.37 | 0.00 | A     | 73.13   | EPHB3     | 3q21-qter     |
| 226506_at    | 1.00 | 0.99 | P     | 160.63  | 0.37 | 0.00 | A     | 58.57   | FLJ13710  | 15q22.33      |
| 208783_s_at  | 1.00 | 0.96 | P     | 1524.33 | 0.37 | 0.00 | P     | 553.13  | MCP       | 1q32          |
| 1556136_at   | 0.99 | 0.93 | P,M,A | 71.20   | 0.37 | 0.02 | A     | 26.70   | LOC340156 | 6p25.2        |
| 221992_at    | 1.00 | 0.97 | P     | 174.37  | 0.37 | 0.00 | P     | 63.13   | KIAA0220  | 16p12.3       |
| 1568623_a_at | 1.00 | 0.98 | P     | 118.47  | 0.37 | 0.01 | P     | 43.10   | SLC35E4   | 22q12.2       |
| 1555461_at   | 1.00 | 0.99 | P     | 94.00   | 0.37 | 0.01 | P,A   | 34.23   |           |               |
| 219854_at    | 1.00 | 0.96 | P     | 97.60   | 0.37 | 0.01 | M,A   | 35.47   | ZNF14     | 19p13.3-p13.2 |
| 240314_at    | 0.98 | 0.90 | P     | 93.90   | 0.37 | 0.03 | P,A   | 34.87   |           |               |
| 216179_x_at  | 0.98 | 0.90 | P     | 48.40   | 0.37 | 0.00 | A     | 17.73   |           |               |
| 1555148_a_at | 0.97 | 0.88 | P,A   | 43.67   | 0.37 | 0.02 | A     | 16.40   | LOC130951 | 2p13.1        |
| 201757_at    | 1.00 | 0.99 | P     | 5784.67 | 0.37 | 0.00 | P     | 2104.53 | NDUFS5    | 1p34.2-p33    |
| 42361_g_at   | 0.99 | 0.93 | P     | 350.57  | 0.37 | 0.01 | P     | 127.30  | C6orf18   | 6p21.3        |
| 237159_x_at  | 1.00 | 0.96 | P     | 118.03  | 0.37 | 0.01 | P     | 43.03   |           |               |
| 219453_at    | 1.00 | 0.99 | P     | 155.23  | 0.37 | 0.00 | P,A   | 56.60   | C16orf44  | 16q24.1       |
| 210664_s_at  | 0.99 | 0.92 | P     | 221.77  | 0.37 | 0.00 | P     | 81.23   | TFPI      | 2q31-q32.1    |
| 203739_at    | 1.00 | 0.96 | P     | 804.37  | 0.37 | 0.00 | P     | 294.00  | ZNF217    | 20q13.2       |
| 201854_s_at  | 0.99 | 0.95 | P     | 971.77  | 0.37 | 0.00 | P     | 354.03  | KIAA0431  | 16q23.2       |
| 1553612_at   | 0.99 | 0.94 | P     | 94.97   | 0.37 | 0.01 | P     | 34.87   | ZNF354B   | 5q35.3        |
| 236665_at    | 0.99 | 0.92 | P     | 103.93  | 0.37 | 0.02 | P     | 38.43   | NY-SAR-41 | 1p22.1        |
| 229499_at    | 0.98 | 0.90 | P     | 187.07  | 0.37 | 0.02 | P,M,A | 69.17   | CAPN13    | 2p22-p21      |
| 1565804_at   | 1.00 | 0.97 | P     | 79.53   | 0.37 | 0.01 | A     | 29.23   |           |               |
| 200633_at    | 1.00 | 0.99 | P     | 5669.90 | 0.37 | 0.00 | P     | 2071.97 | UBB       | 17p12-p11.2   |
| 224763_at    | 0.99 | 0.93 | P     | 275.73  | 0.37 | 0.02 | P     | 102.00  |           |               |
| 226195_at    | 0.99 | 0.92 | P,A   | 156.10  | 0.37 | 0.00 | A     | 57.00   | MGC16028  | 14q24.3       |
| 236172_at    | 1.00 | 0.96 | P,A   | 91.80   | 0.37 | 0.01 | A     | 33.73   | LTBR      | 14q11.2-q12   |
| 215314_at    | 0.99 | 0.93 | P     | 75.70   | 0.37 | 0.02 | P,A   | 28.27   | ANK3      | 10q21         |
| 227508_at    | 0.99 | 0.92 | P     | 166.23  | 0.37 | 0.00 | P,A   | 61.13   |           |               |
| 1553227_s_at | 1.00 | 0.95 | P     | 115.93  | 0.37 | 0.01 | P     | 42.87   | C21orf107 | 21q22.2       |
| 203266_s_at  | 1.00 | 0.96 | P     | 246.33  | 0.37 | 0.00 | P     | 90.47   | MAP2K4    | 17p11.2       |
| 225177_at    | 1.00 | 1.00 | P     | 556.17  | 0.37 | 0.00 | P     | 204.17  | RCP       | 8p11.22       |
| 239797_at    | 0.99 | 0.92 | P     | 63.20   | 0.37 | 0.00 | A     | 23.27   |           |               |
| 213135_at    | 1.00 | 0.95 | P     | 705.93  | 0.37 | 0.00 | P     | 259.70  | TIAM1     | 21q22.1       |
| 214798_at    | 1.00 | 0.96 | P     | 55.37   | 0.37 | 0.01 | P     | 20.53   | KIAA0703  | 16q24.1       |
| 244026_at    | 1.00 | 0.97 | P     | 91.80   | 0.37 | 0.01 | P,A   | 33.80   |           |               |
| 1569257_at   | 1.00 | 0.97 | P,A   | 11.27   | 0.37 | 0.00 | A     | 4.13    | FMNL1     | 17q21         |
| 227946_at    | 1.00 | 0.96 | P,A   | 159.70  | 0.37 | 0.00 | A     | 58.80   | OSBPL7    | 17q21         |
| 1554824_at   | 1.00 | 0.98 | P,A   | 31.70   | 0.37 | 0.02 | A     | 11.77   | ZNF585A   | 19q13.13      |
| 212847_at    | 0.99 | 0.94 | P     | 459.77  | 0.37 | 0.00 | P     | 169.73  | NEXN      | 1p31.1        |
| 225666_at    | 1.00 | 1.00 | P     | 438.23  | 0.37 | 0.00 | P     | 161.07  | FLJ14624  | 13q32.3       |
| 214440_at    | 0.99 | 0.95 | P     | 415.43  | 0.37 | 0.00 | P     | 153.50  | NAT1      | 8p23.1-p21.3  |
| 200752_s_at  | 0.98 | 0.91 | P     | 703.37  | 0.37 | 0.01 | P     | 262.50  | CAPN1     | 11q13         |
| 201816_s_at  | 0.99 | 0.93 | P     | 2763.57 | 0.37 | 0.00 | P     | 1021.57 | GBAS      | 7p12          |
| 223391_at    | 1.00 | 0.95 | P     | 586.47  | 0.37 | 0.01 | P     | 217.33  | SGPP1     | 14q23.2       |
| 225989_at    | 1.00 | 0.98 | P     | 412.80  | 0.37 | 0.01 | P     | 152.67  | HERC4     | 10q22.1       |
| 236267_at    | 1.00 | 0.95 | P     | 153.20  | 0.38 | 0.00 | P     | 56.37   | ZNF346    | 5q35.3        |
| 202012_s_at  | 1.00 | 0.96 | P     | 1039.57 | 0.38 | 0.00 | P     | 385.07  | EXT2      | 11p12-p11     |
| 37831_at     | 0.98 | 0.91 | P     | 364.67  | 0.38 | 0.01 | P,A   | 134.57  | SIPA1L3   | 19q13.13      |
| 218522_s_at  | 1.00 | 0.95 | P     | 360.43  | 0.38 | 0.00 | P     | 133.40  | BPY2IP1   | 19p13.12      |
| 226951_at    | 1.00 | 0.95 | P     | 206.83  | 0.38 | 0.00 | P     | 76.57   | MGC5509   | 2q12.2        |
| 227191_at    | 0.99 | 0.95 | P     | 117.57  | 0.38 | 0.00 | P     | 43.57   | CDA08     | 16q11.2       |
| 232860_x_at  | 1.00 | 0.96 | P     | 155.13  | 0.38 | 0.01 | P     | 57.70   | FLJ11016  | xq22.1-24     |
| 215773_x_at  | 1.00 | 0.98 | P     | 1250.77 | 0.38 | 0.00 | P     | 463.87  | ADPRTL2   | 14q11.2-q12   |
| 232331_at    | 0.99 | 0.94 | P     | 130.63  | 0.38 | 0.00 | M     | 48.33   |           |               |
| 203104_at    | 1.00 | 0.96 | P,M,A | 84.63   | 0.38 | 0.01 | A     | 31.60   | CSF1R     | 5q33-q35      |
| 206510_at    | 0.99 | 0.93 | P     | 85.40   | 0.38 | 0.01 | A     | 31.77   | SIX2      | 2p16-p15      |
| 227911_at    | 0.99 | 0.93 | P     | 149.13  | 0.38 | 0.01 | A     | 55.73   | FLJ10312  | 18p11.23      |
| 204517_at    | 1.00 | 0.99 | P     | 1526.57 | 0.38 | 0.00 | P     | 566.37  | PPIC      | 5q23.2        |
| 46323_at     | 1.00 | 0.98 | P     | 1308.50 | 0.38 | 0.00 | P     | 484.53  | ENTPD8    | 17q25.3       |
| 204005_s_at  | 0.99 | 0.93 | P     | 255.33  | 0.38 | 0.00 | P     | 95.40   | PAWR      | 12q21         |
| 218923_at    | 1.00 | 0.96 | P     | 232.57  | 0.38 | 0.00 | P     | 86.30   | CTBS      | 1p22          |
| 204798_at    | 0.99 | 0.95 | P     | 526.37  | 0.38 | 0.01 | P     | 197.33  | MYB       | 6q22-q23      |
| 201548_s_at  | 1.00 | 0.98 | P     | 292.73  | 0.38 | 0.00 | P     | 108.83  | JARID1B   | 1q32.1        |
| 235033_at    | 1.00 | 0.95 | P     | 61.03   | 0.38 | 0.02 | P,M   | 23.27   | NPEPL1    | 20q13.32      |
| 221989_at    | 1.00 | 0.95 | P     | 880.63  | 0.38 | 0.00 | P     | 328.10  | RPL10     | xq28          |
| 222835_at    | 0.99 | 0.95 | P     | 155.87  | 0.38 | 0.01 | P     | 58.93   | FLJ13710  | 15q22.33      |
| 1559057_at   | 0.98 | 0.89 | P     | 46.13   | 0.38 | 0.03 | A     | 17.43   | FLJ23018  | Xq23          |

|              |      |      |     |         |      |      |       |         |                |               |
|--------------|------|------|-----|---------|------|------|-------|---------|----------------|---------------|
| 224974_at    | 1.00 | 0.96 | P   | 392.50  | 0.38 | 0.02 | P     | 147.17  | SDS3           | 12q24.23      |
| 210461_s_at  | 0.98 | 0.91 | P   | 141.77  | 0.38 | 0.02 | P     | 54.30   | ABLIM1         | 10q25         |
| 1556678_a_at | 0.99 | 0.92 | P   | 35.73   | 0.38 | 0.02 | A     | 13.40   | LOC284371      | 19q13.41      |
| 204745_x_at  | 0.99 | 0.94 | P   | 1098.13 | 0.38 | 0.00 | P     | 410.20  | MT1G           | 16q13         |
| 213258_at    | 1.00 | 0.97 | P   | 248.27  | 0.38 | 0.01 | P     | 93.13   | TFPI           | 2q31-q32.1    |
| 225606_at    | 1.00 | 0.98 | P   | 242.30  | 0.38 | 0.00 | A     | 90.63   | BCL2L11        | 2q13          |
| 215397_x_at  | 0.99 | 0.92 | P   | 142.20  | 0.38 | 0.02 | P,A   | 54.03   |                |               |
| 211529_x_at  | 0.98 | 0.91 | P   | 1195.27 | 0.38 | 0.00 | P     | 448.13  | HLA-G          | 6p21.3        |
| 204991_s_at  | 1.00 | 0.98 | P   | 95.27   | 0.38 | 0.01 | P     | 35.87   | NF2            | 22q12.2       |
| 222787_s_at  | 0.99 | 0.93 | P   | 586.10  | 0.38 | 0.01 | P     | 221.10  | FLJ11273       | 7p21.3        |
| 204326_x_at  | 1.00 | 0.99 | P   | 2695.57 | 0.38 | 0.01 | P     | 1009.97 | MT1X           | 16q13         |
| 1557432_at   | 0.99 | 0.93 | P   | 70.40   | 0.38 | 0.01 | A     | 26.33   | RASAL2         | 1q24          |
| 238613_at    | 0.99 | 0.92 | P   | 329.87  | 0.38 | 0.01 | A     | 123.87  | ZAK            | 2q24.2        |
| 235848_x_at  | 0.99 | 0.93 | P   | 292.63  | 0.38 | 0.00 | P     | 109.63  |                |               |
| 212079_s_at  | 1.00 | 0.95 | P   | 163.40  | 0.38 | 0.02 | P     | 62.70   | MLL            | 11q23         |
| 216215_s_at  | 0.99 | 0.92 | P   | 901.10  | 0.38 | 0.00 | P     | 336.53  | RBM9           | 22q13.1       |
| 222751_at    | 1.00 | 0.96 | P   | 580.70  | 0.38 | 0.01 | P     | 218.60  | FLJ22313       | 7p14.2        |
| 238686_at    | 0.98 | 0.91 | P   | 293.97  | 0.38 | 0.00 | P     | 110.83  | FBX03          | 11p13         |
| 226493_at    | 0.99 | 0.94 | P   | 583.80  | 0.38 | 0.00 | P     | 219.57  | FLJ31322       | 2q33.2        |
| 219297_at    | 0.99 | 0.94 | P   | 424.23  | 0.38 | 0.01 | P     | 160.13  | DKFZp686L20145 | xq24          |
| 209989_at    | 0.99 | 0.92 | P   | 75.13   | 0.38 | 0.01 | P,A   | 28.40   | ZNF268         | 12q24.33      |
| 226181_at    | 0.99 | 0.94 | P   | 495.63  | 0.38 | 0.00 | P     | 186.60  | TUBE1          | 6q21          |
| 230179_at    | 1.00 | 0.97 | P   | 682.73  | 0.38 | 0.00 | P     | 256.63  | LOC285812      | 6p23          |
| 202414_at    | 1.00 | 0.98 | P   | 331.00  | 0.38 | 0.00 | P     | 124.20  | ERCC5          | 13q22         |
| 227697_at    | 0.99 | 0.94 | P,A | 18.97   | 0.38 | 0.01 | A     | 7.20    | SOC53          | 17q25.3       |
| 235305_s_at  | 1.00 | 0.96 | P   | 82.43   | 0.38 | 0.00 | A     | 31.00   | FLJ10948       | 1p32.3        |
| 220235_s_at  | 0.99 | 0.92 | P   | 316.07  | 0.38 | 0.00 | P     | 119.23  | RIF1           | 1p13.2        |
| 1555105_a_at | 1.00 | 0.98 | P   | 137.30  | 0.38 | 0.00 | P     | 51.53   | MI-ER1         | 1p31.3        |
| 204067_at    | 0.99 | 0.94 | P,A | 224.57  | 0.38 | 0.03 | A     | 85.93   | SUOX           | 12q13.13      |
| 212285_s_at  | 1.00 | 0.98 | P   | 1300.10 | 0.38 | 0.01 | P     | 489.07  | AGRN           | 1p36.33       |
| 1556344_at   | 0.99 | 0.94 | P   | 122.30  | 0.38 | 0.00 | A     | 46.47   |                | 21q22.11      |
| 212554_at    | 0.99 | 0.93 | P   | 719.43  | 0.38 | 0.00 | P     | 272.37  | CAP2           | 6p22.3        |
| 229615_at    | 0.99 | 0.94 | P,A | 163.83  | 0.38 | 0.03 | P     | 62.70   |                |               |
| 241815_at    | 0.99 | 0.92 | P   | 38.17   | 0.38 | 0.03 | P     | 14.73   |                |               |
| 223276_at    | 1.00 | 0.97 | P   | 297.63  | 0.38 | 0.00 | P     | 112.77  | NID67          | 5q33.1        |
| 225675_at    | 0.99 | 0.93 | P   | 132.60  | 0.38 | 0.03 | P     | 51.20   | C14orf101      | 14q22.3       |
| 201579_at    | 1.00 | 0.97 | P   | 1084.33 | 0.38 | 0.01 | P     | 410.63  | FAT            | 4q34-q35      |
| 210389_x_at  | 1.00 | 0.98 | P   | 248.30  | 0.38 | 0.00 | P     | 94.13   | TUBD1          | 17q23.2       |
| 212131_at    | 1.00 | 0.96 | P   | 1027.33 | 0.38 | 0.00 | P     | 388.47  | C19orf13       | 19q13.12      |
| 226316_at    | 0.99 | 0.93 | P   | 194.33  | 0.38 | 0.03 | P     | 74.83   | C13orf10       | 13q22.2       |
| 226705_at    | 0.99 | 0.94 | P   | 228.17  | 0.38 | 0.02 | A     | 87.83   | FGFR1          | 8p11.2-p11.1  |
| 210070_s_at  | 0.99 | 0.95 | P   | 186.90  | 0.38 | 0.00 | P     | 70.50   | CPT1B          | 22q13.33      |
| 202487_s_at  | 0.99 | 0.93 | P   | 2994.43 | 0.38 | 0.00 | P     | 1135.57 | H2AFV          | 7p13          |
| 1563881_at   | 0.98 | 0.89 | P   | 23.43   | 0.38 | 0.03 | A     | 9.13    |                |               |
| 207733_x_at  | 1.00 | 0.98 | P   | 174.13  | 0.38 | 0.01 | A     | 67.00   | PSG9           | 19q13.2       |
| 1555372_at   | 1.00 | 0.97 | P   | 245.87  | 0.38 | 0.00 | P,M   | 93.33   | BCL2L11        | 2q13          |
| 224492_s_at  | 0.99 | 0.93 | P   | 429.50  | 0.38 | 0.01 | P     | 165.27  | ZNF627         | 19p13.2       |
| 202771_at    | 1.00 | 0.97 | P   | 1195.73 | 0.38 | 0.00 | P     | 454.70  | FAM38A         | 16q24.3       |
| 204765_at    | 1.00 | 0.97 | P   | 308.47  | 0.38 | 0.02 | A     | 118.83  | ARHGFE5        | 7q33-q35      |
| 227279_at    | 1.00 | 0.96 | P   | 1288.90 | 0.39 | 0.01 | P     | 489.47  | MGC15737       | xq22.2        |
| 221059_s_at  | 1.00 | 1.00 | P   | 2278.67 | 0.39 | 0.00 | P     | 863.63  | CHST6          | 16q22         |
| 217995_at    | 0.99 | 0.95 | P   | 898.97  | 0.39 | 0.01 | P     | 342.17  | SQRDL          | 15q15         |
| 40569_at     | 1.00 | 0.98 | P   | 329.50  | 0.39 | 0.00 | P     | 124.80  | ZNF42          | 19q13.2-q13.4 |
| 201417_at    | 0.99 | 0.94 | P   | 1096.63 | 0.39 | 0.00 | P     | 417.00  | SOX4           | 6p22.3        |
| 223605_at    | 0.99 | 0.92 | P   | 80.33   | 0.39 | 0.03 | A     | 31.33   | SLC25A18       | 22q11.2       |
| 231828_at    | 1.00 | 0.98 | P   | 212.47  | 0.39 | 0.01 | P     | 81.50   |                |               |
| 218798_at    | 0.98 | 0.91 | P   | 301.97  | 0.39 | 0.01 | P     | 115.23  | FLJ12949       | 19p13.2       |
| 206860_s_at  | 1.00 | 0.97 | P   | 536.80  | 0.39 | 0.01 | P     | 205.17  | FLJ20323       | 7p22-p21      |
| 219185_at    | 1.00 | 0.96 | P   | 251.70  | 0.39 | 0.01 | P     | 96.20   | SIRT5          | 6p23          |
| 218072_at    | 0.98 | 0.90 | P   | 784.77  | 0.39 | 0.00 | P     | 296.47  | COMMD9         | 11p13         |
| 219209_at    | 0.98 | 0.91 | P   | 132.57  | 0.39 | 0.02 | P     | 51.70   | MDA5           | 2p24.3-q24.3  |
| 204295_at    | 0.99 | 0.92 | P   | 750.27  | 0.39 | 0.01 | P,M,A | 286.40  | SURF1          | 9q34.2        |
| 232373_at    | 1.00 | 0.96 | P,A | 47.07   | 0.39 | 0.01 | A     | 18.00   | NOXA1          |               |
| 230933_at    | 1.00 | 0.97 | P   | 76.13   | 0.39 | 0.01 | P,A   | 29.43   | DSTN           | 20p11.23      |
| 229119_s_at  | 1.00 | 0.96 | P   | 819.40  | 0.39 | 0.00 | P     | 312.47  | ACTB           | 7p15-p12      |
| 212729_at    | 0.99 | 0.93 | P   | 195.00  | 0.39 | 0.00 | P     | 74.67   | DLG3           | xq13.1        |
| 202602_s_at  | 1.00 | 0.99 | P   | 3092.67 | 0.39 | 0.00 | P     | 1178.93 | HTATSF1        | xq26.1-q27.2  |
| 221568_s_at  | 1.00 | 0.98 | P   | 1846.63 | 0.39 | 0.00 | P     | 705.33  | LIN7C          | 11p14         |
| 221230_s_at  | 1.00 | 0.97 | P   | 576.57  | 0.39 | 0.00 | P     | 220.13  | ARID4B         | 1q42.1-q43    |
| 235245_at    | 0.99 | 0.92 | P,A | 112.03  | 0.39 | 0.03 | A     | 44.03   | FLJ33318       | 17q21.33      |
| 209704_at    | 0.99 | 0.92 | P   | 267.57  | 0.39 | 0.01 | P     | 103.00  | M96            | 1p22.1        |
| 235110_at    | 1.00 | 0.98 | P   | 196.03  | 0.39 | 0.00 | P     | 75.17   | HRASLS3        | 11q13.1       |
| 229099_at    | 0.99 | 0.93 | P   | 416.13  | 0.39 | 0.03 | P     | 161.27  |                |               |
| 244699_at    | 0.98 | 0.89 | P   | 136.27  | 0.39 | 0.03 | A     | 52.63   | AHI1           | 6q23.2        |
| 226246_at    | 0.98 | 0.91 | P   | 465.03  | 0.39 | 0.00 | A     | 178.83  | KCTD1          | 18q12.1       |
| 1553175_s_at | 1.00 | 0.98 | P,A | 48.50   | 0.39 | 0.00 | A     | 18.57   | PDE5A          | 4q25-q27      |
| 234974_at    | 0.99 | 0.92 | P,A | 82.33   | 0.39 | 0.01 | A     | 31.90   | GALM           | 2p22.3        |
| 213034_at    | 1.00 | 0.98 | P   | 379.23  | 0.39 | 0.00 | P     | 145.43  | KIAA0999       | 11q23.3       |
| 227319_at    | 1.00 | 0.98 | P   | 713.27  | 0.39 | 0.00 | P     | 273.50  | C16orf44       | 16q24.1       |
| 226499_at    | 0.99 | 0.94 | P   | 121.60  | 0.39 | 0.00 | A     | 46.57   | TUBB2          |               |
| 209706_at    | 1.00 | 0.96 | P   | 179.60  | 0.39 | 0.02 | P     | 69.87   | NKX3-1         | 8p21          |
| 218486_at    | 0.99 | 0.94 | P   | 429.43  | 0.39 | 0.00 | P     | 165.50  | TIEG2          | 2p25          |
| 44563_at     | 0.99 | 0.92 | P   | 667.60  | 0.39 | 0.00 | P     | 255.37  | FLJ10385       | 17p13.2       |
| 240231_at    | 0.99 | 0.93 | P   | 116.63  | 0.39 | 0.01 | P     | 45.30   |                |               |
| 1565868_at   | 0.98 | 0.89 | P   | 246.50  | 0.39 | 0.01 | P     | 95.37   |                |               |
| 218532_s_at  | 1.00 | 0.99 | P   | 50.27   | 0.39 | 0.01 | P,A   | 19.47   | FLJ20152       | 5p15.1        |
| 209822_s_at  | 0.99 | 0.94 | P   | 157.73  | 0.39 | 0.00 | P     | 61.00   | VLDLR          | 9p24          |
| 241397_at    | 0.99 | 0.94 | P   | 70.80   | 0.39 | 0.03 | A     | 27.97   | EHF            | 11p12         |
| 217596_at    | 0.98 | 0.90 | P,A | 87.57   | 0.39 | 0.02 | A     | 34.27   | UPF3A          | 13q34         |
| 226669_at    | 0.99 | 0.95 | P   | 278.73  | 0.39 | 0.00 | P     | 107.03  | USP42          | 7p22.2        |
| 204545_at    | 0.99 | 0.93 | P   | 192.40  | 0.39 | 0.02 | P,A   | 74.90   | PEX6           | 6p21.1        |
| 235071_at    | 1.00 | 0.99 | P   | 294.00  | 0.39 | 0.01 | P     | 114.17  | LOC116143      | 2p13.3        |
| 202736_s_at  | 0.99 | 0.93 | P   | 1231.90 | 0.39 | 0.00 | P     | 476.90  | LSM4           | 19p13.11      |
| 242920_at    | 0.99 | 0.94 | P   | 125.97  | 0.39 | 0.02 | P     | 49.10   |                |               |
| 219928_s_at  | 0.98 | 0.91 | P   | 145.10  | 0.39 | 0.01 | P,A   | 56.03   | CABYR          | 18q11.2       |
| 227840_at    | 1.00 | 0.96 | P   | 176.10  | 0.39 | 0.01 | P     | 68.30   | LOC130355      | 2q14.2        |

|              |      |      |       |         |      |      |       |         |           |                 |
|--------------|------|------|-------|---------|------|------|-------|---------|-----------|-----------------|
| 1565863_at   | 0.99 | 0.91 | P     | 49.57   | 0.39 | 0.01 | P,A   | 19.23   |           |                 |
| 221626_at    | 0.98 | 0.90 | P     | 105.93  | 0.39 | 0.01 | P     | 41.27   | ZNF506    | 19p13.11        |
| 241853_at    | 0.98 | 0.91 | P     | 15.50   | 0.39 | 0.00 | P,A   | 6.00    |           |                 |
| 228932_at    | 0.99 | 0.94 | P     | 180.30  | 0.39 | 0.02 | P     | 70.63   |           |                 |
| 225235_at    | 1.00 | 0.99 | P     | 1072.83 | 0.39 | 0.01 | P     | 416.00  | FBXO23    | 5q35.3          |
| 1554743_x_at | 0.98 | 0.90 | P,A   | 59.60   | 0.39 | 0.01 | A     | 23.23   | PMS1      | 2q31.1          |
| 228347_at    | 0.99 | 0.92 | P     | 178.27  | 0.39 | 0.00 | P     | 69.27   | SIX1      | 14q23.1         |
| 226259_at    | 0.99 | 0.91 | P     | 228.77  | 0.39 | 0.00 | P     | 88.47   | SEC15L1   | 10q23.33        |
| 233078_at    | 0.99 | 0.91 | P     | 336.17  | 0.39 | 0.01 | P     | 130.83  |           |                 |
| 207865_s_at  | 0.99 | 0.94 | P,M   | 26.93   | 0.39 | 0.01 | A     | 10.47   | BMP8B     | 1p35-p32        |
| 224991_at    | 1.00 | 0.95 | P     | 520.20  | 0.39 | 0.01 | P,M,A | 203.03  | CMIP      | 16q23           |
| 203114_at    | 1.00 | 0.96 | P     | 540.40  | 0.39 | 0.02 | P     | 211.43  | SSSCA1    | 11q13.1         |
| 1554890_a_at | 0.99 | 0.94 | P     | 194.33  | 0.39 | 0.02 | P     | 76.40   | TIA1      | 2p13            |
| 219503_s_at  | 1.00 | 0.98 | P     | 69.20   | 0.39 | 0.00 | P,A   | 26.97   | FLJ11036  | 3p25.2          |
| 214355_x_at  | 1.00 | 0.99 | P     | 512.43  | 0.39 | 0.00 | A     | 198.60  | MGEA6     | 14q13.3         |
| 202932_at    | 0.99 | 0.94 | P     | 2062.87 | 0.39 | 0.00 | P     | 803.20  | YES1      | 18p11.31-p11.21 |
| 228297_at    | 1.00 | 0.96 | P     | 2167.30 | 0.39 | 0.00 | P     | 842.90  | CNN3      | 1p22-p21        |
| 201933_at    | 1.00 | 0.98 | P     | 817.90  | 0.39 | 0.01 | P     | 318.57  | PCOLN3    | 16q24.3         |
| 218395_at    | 1.00 | 0.99 | P     | 829.80  | 0.39 | 0.00 | P     | 322.70  | ACTR6     | 12q23.3         |
| 201549_x_at  | 1.00 | 0.98 | P     | 424.63  | 0.39 | 0.00 | P     | 165.77  | JARID1B   | 1q32.1          |
| 35156_at     | 0.99 | 0.94 | P     | 724.53  | 0.40 | 0.00 | P     | 280.80  | LOC203069 | 8p21.2          |
| 224715_at    | 1.00 | 0.96 | P     | 1568.97 | 0.40 | 0.00 | P     | 608.77  | WDR34     | 9q34.13         |
| 202859_x_at  | 0.99 | 0.93 | P     | 156.70  | 0.40 | 0.00 | P,A   | 61.13   | IL8       | 4q13-q21        |
| 215313_x_at  | 1.00 | 0.99 | P     | 4370.70 | 0.40 | 0.00 | P     | 1702.17 | HLA-A     | 6p21.3          |
| 226085_at    | 0.99 | 0.94 | P     | 1420.20 | 0.40 | 0.00 | P     | 554.67  |           |                 |
| 225144_at    | 0.99 | 0.94 | P     | 541.33  | 0.40 | 0.00 | P     | 211.33  | BMPR2     | 2q33-q34        |
| 229582_at    | 1.00 | 0.96 | P     | 651.13  | 0.40 | 0.00 | P     | 254.13  | LOC125476 | 18q12.2         |
| 201275_at    | 1.00 | 0.98 | P     | 2312.53 | 0.40 | 0.01 | P     | 903.57  | FDPS      | 1q22            |
| 220092_s_at  | 0.98 | 0.91 | P,A   | 52.83   | 0.40 | 0.01 | A     | 20.73   | ANTXR1    | 2p13.1          |
| 242488_at    | 1.00 | 0.97 | P     | 107.67  | 0.40 | 0.00 | P     | 42.07   |           |                 |
| 1558345_a_at | 0.99 | 0.92 | P     | 199.90  | 0.40 | 0.00 | M,A   | 77.70   | LOC283031 | 10q11.21        |
| 1553768_a_at | 0.99 | 0.94 | P     | 168.63  | 0.40 | 0.00 | P,A   | 65.97   | DCBLD1    | 6q22.31         |
| 202933_s_at  | 0.99 | 0.94 | P     | 2843.87 | 0.40 | 0.02 | P     | 1128.03 | YES1      | 18p11.31-p11.21 |
| 213526_s_at  | 1.00 | 0.95 | P     | 187.10  | 0.40 | 0.01 | P     | 73.10   | F25965    | 19q13.1         |
| 218467_at    | 1.00 | 0.96 | P     | 4131.77 | 0.40 | 0.00 | P     | 1616.60 | TNFSF5IP1 | 18p11.21        |
| 211979_at    | 1.00 | 0.95 | P     | 274.17  | 0.40 | 0.02 | P,A   | 108.43  | GPR107    | 9q34.2          |
| 205641_s_at  | 1.00 | 0.99 | P,A   | 248.37  | 0.40 | 0.01 | A     | 98.03   | TRADD     | 16q22           |
| 235659_at    | 0.99 | 0.93 | P,A   | 171.10  | 0.40 | 0.00 | A     | 66.93   |           |                 |
| 229436_x_at  | 1.00 | 0.99 | P     | 716.37  | 0.40 | 0.01 | P     | 281.50  | C6.1A     | Xq28            |
| 212104_s_at  | 0.99 | 0.94 | P     | 804.97  | 0.40 | 0.01 | P     | 317.93  | RBM9      | 22q13.1         |
| 240155_x_at  | 0.98 | 0.89 | P     | 103.97  | 0.40 | 0.02 | P,M   | 41.00   | LOC115648 | 19p13.11        |
| 229648_at    | 0.99 | 0.92 | P     | 116.63  | 0.40 | 0.01 | P     | 46.37   | RICS      | 11q24-q25       |
| 203758_at    | 0.99 | 0.95 | P     | 262.03  | 0.40 | 0.00 | P     | 103.17  | CTSO      | 4q31-q32        |
| 208934_s_at  | 1.00 | 0.97 | P     | 199.50  | 0.40 | 0.00 | M,A   | 78.43   | LGALS8    | 1q42-q43        |
| 209275_s_at  | 0.99 | 0.92 | P     | 655.10  | 0.40 | 0.01 | P     | 258.03  | CLN3      | 16p12.1         |
| 225101_s_at  | 1.00 | 0.96 | P     | 697.37  | 0.40 | 0.00 | P     | 274.00  | SNX14     | 6q15            |
| 1554406_a_at | 1.00 | 0.97 | P,M,A | 142.10  | 0.40 | 0.01 | A     | 56.53   | CLECSF12  | 12p13.2-p12.3   |
| 217144_at    | 1.00 | 0.97 | P     | 1584.20 | 0.40 | 0.01 | P     | 624.00  | UBB       | 17p12-p11.2     |
| 219336_s_at  | 1.00 | 0.98 | P     | 453.83  | 0.40 | 0.02 | P     | 181.33  | ASCC1     | 10pter-q25.3    |
| 235086_at    | 1.00 | 0.95 | P,A   | 163.67  | 0.40 | 0.00 | A     | 64.60   | THBS1     | 15q15           |
| 243444_at    | 0.98 | 0.91 | P,M,A | 87.83   | 0.40 | 0.02 | A     | 35.43   |           |                 |
| 232749_at    | 0.99 | 0.94 | P     | 93.60   | 0.40 | 0.01 | P     | 37.13   |           |                 |
| 238967_at    | 0.99 | 0.95 | P     | 70.33   | 0.40 | 0.01 | P,A   | 28.10   |           |                 |
| 219754_at    | 1.00 | 0.99 | P     | 268.60  | 0.40 | 0.01 | P,A   | 106.63  | FLJ11016  | xq22.1-24       |
| 227467_at    | 0.99 | 0.94 | P     | 371.73  | 0.40 | 0.00 | P     | 146.73  | RDH10     | 8q13.3          |
| 206385_s_at  | 1.00 | 0.98 | P     | 601.77  | 0.40 | 0.01 | P     | 238.30  | ANK3      | 10q21           |
| 229943_at    | 1.00 | 0.99 | P     | 305.70  | 0.40 | 0.01 | P,A   | 122.33  | RFP2      | 13q14           |
| 236251_at    | 1.00 | 0.97 | P     | 427.07  | 0.40 | 0.02 | P     | 169.80  |           |                 |
| 41387_r_at   | 0.99 | 0.94 | P     | 365.13  | 0.40 | 0.02 | P     | 145.03  | JMJD3     | 17p13.1         |
| 213946_s_at  | 1.00 | 0.98 | P     | 93.43   | 0.40 | 0.01 | P,A   | 37.10   | KIAA0657  | 2q36.1          |
| 227804_at    | 1.00 | 0.99 | P     | 224.83  | 0.40 | 0.00 | P     | 88.77   | LOC116238 | 17q11.2         |
| 228639_at    | 1.00 | 0.96 | P     | 164.23  | 0.40 | 0.01 | P,A   | 65.37   | FGD1      | Xp11.21         |
| 213287_s_at  | 1.00 | 0.97 | P     | 3185.63 | 0.40 | 0.00 | P     | 1258.60 | KRT10     | 17q21           |
| 228559_at    | 1.00 | 0.98 | P     | 1186.70 | 0.40 | 0.01 | P     | 470.07  |           |                 |
| 243894_at    | 1.00 | 0.99 | P     | 111.00  | 0.40 | 0.00 | P     | 44.10   | SLC41A2   | 12q24.11        |
| 221754_s_at  | 0.99 | 0.92 | P     | 388.63  | 0.40 | 0.01 | P     | 154.00  | CORO1B    | 11q13.1         |
| 212368_at    | 1.00 | 0.96 | P     | 507.73  | 0.40 | 0.01 | P     | 201.83  | ZNF292    | 6q15            |
| 224852_at    | 0.98 | 0.90 | P     | 280.60  | 0.40 | 0.00 | P     | 112.03  | TTC17     | 11p11.2         |
| 212641_at    | 1.00 | 0.96 | P     | 123.93  | 0.40 | 0.02 | P,A   | 49.80   | HIVEP2    | 6q23-q24        |
| 235099_at    | 0.99 | 0.94 | P     | 405.43  | 0.40 | 0.01 | P     | 161.10  | CKLFSF8   | 3p22.3          |
| 218217_at    | 0.99 | 0.92 | P     | 396.60  | 0.40 | 0.00 | P     | 158.23  | SCPEP1    | 17q23.2         |
| 228919_at    | 1.00 | 0.96 | P     | 252.50  | 0.40 | 0.00 | P     | 100.43  |           |                 |
| 210651_s_at  | 0.99 | 0.93 | P     | 126.33  | 0.40 | 0.00 | A     | 50.20   | EPHB2     | 1p36.1-p35      |
| 210045_at    | 1.00 | 0.99 | P,M   | 216.43  | 0.40 | 0.01 | A     | 86.43   | IDH2      | 15q26.1         |
| 225289_at    | 0.99 | 0.94 | P     | 560.47  | 0.40 | 0.00 | P     | 224.17  | STAT3     | 17q21.31        |
| 1553719_s_at | 1.00 | 0.97 | P     | 81.33   | 0.41 | 0.00 | P     | 32.47   | ZNF548    | 19q13.43        |
| 202083_s_at  | 1.00 | 0.98 | P     | 127.03  | 0.41 | 0.01 | P     | 50.63   | SEC14L1   | 17q25.1-17q25.2 |
| 235191_at    | 0.99 | 0.92 | P     | 220.73  | 0.41 | 0.02 | P     | 89.43   | LOC148189 | 19q12           |
| 205871_at    | 0.98 | 0.91 | P     | 53.93   | 0.41 | 0.01 | P     | 21.73   | PLGL      | 2p11-q11        |
| 215068_s_at  | 1.00 | 0.98 | P     | 226.50  | 0.41 | 0.00 | P     | 90.50   | FLJ11467  | 7p22.2          |
| 221768_at    | 0.99 | 0.94 | P     | 673.00  | 0.41 | 0.01 | P     | 269.93  | SFPQ      | 1p34.3          |
| 201409_s_at  | 0.98 | 0.91 | P     | 828.93  | 0.41 | 0.01 | P     | 333.10  | PPP1CB    | 2p23            |
| 213116_at    | 0.98 | 0.90 | P     | 124.00  | 0.41 | 0.01 | P,A   | 49.50   | NEK3      | 13q14.13        |
| 212321_at    | 1.00 | 0.97 | P     | 451.23  | 0.41 | 0.00 | P     | 180.00  | SGPL1     | 10q21           |
| 208614_s_at  | 0.98 | 0.91 | P     | 229.27  | 0.41 | 0.01 | M,A   | 92.20   | FLNB      | 3p14.3          |
| 217896_s_at  | 1.00 | 0.96 | P     | 313.10  | 0.41 | 0.01 | A     | 126.00  | NIP30     | 16q13           |
| 205546_s_at  | 1.00 | 0.97 | P     | 1188.97 | 0.41 | 0.00 | P     | 473.17  | TYK2      | 19p13.2         |
| 212815_at    | 0.99 | 0.92 | P     | 1011.77 | 0.41 | 0.00 | P     | 405.80  | HELIC1    | 6q16            |
| 227036_at    | 0.99 | 0.94 | P     | 274.63  | 0.41 | 0.00 | P     | 110.40  |           |                 |
| 218192_at    | 0.97 | 0.88 | P     | 254.17  | 0.41 | 0.01 | P     | 102.43  | IHPK2     | 3p21.31         |
| 203722_at    | 1.00 | 0.98 | P     | 201.47  | 0.41 | 0.01 | M,A   | 80.83   | ALDH4A1   | 1p36            |
| 202511_s_at  | 1.00 | 0.96 | P     | 1200.23 | 0.41 | 0.00 | P     | 482.03  | APG5L     | 6q21            |
| 233770_at    | 1.00 | 0.97 | P     | 73.53   | 0.41 | 0.00 | P     | 29.50   |           |                 |
| 215380_s_at  | 1.00 | 1.00 | P     | 3972.20 | 0.41 | 0.00 | P     | 1589.63 | C7orf2    | 7p15-p14        |
| 209916_at    | 1.00 | 0.96 | P     | 259.03  | 0.41 | 0.00 | P     | 103.67  | DHTKD1    | 10p14           |
| 219543_at    | 1.00 | 0.97 | P     | 113.23  | 0.41 | 0.00 | P     | 45.43   | MAWBP     | 10pter-q25.3    |

|              |      |      |       |         |      |      |       |         |             |              |
|--------------|------|------|-------|---------|------|------|-------|---------|-------------|--------------|
| 225105_at    | 0.99 | 0.95 | P     | 217.27  | 0.41 | 0.00 | P     | 87.40   | LOC387882   | 12q24.11     |
| 235467_s_at  | 1.00 | 0.96 | P     | 110.83  | 0.41 | 0.01 | P     | 44.57   | KCN4        | 1p21         |
| 228642_at    | 1.00 | 0.97 | P     | 419.20  | 0.41 | 0.00 | P     | 168.47  |             |              |
| 223093_at    | 0.99 | 0.93 | P     | 124.03  | 0.41 | 0.00 | A     | 49.90   | ANKH        | 5p15.1       |
| 235015_at    | 0.98 | 0.90 | P,A   | 150.20  | 0.41 | 0.01 | A     | 60.23   | ZDHHC9      | 9            |
| 209790_s_at  | 0.99 | 0.94 | P     | 358.33  | 0.41 | 0.01 | P     | 144.47  | CASP6       | 4q25         |
| 209971_x_at  | 1.00 | 0.98 | P     | 2411.90 | 0.41 | 0.00 | P     | 969.03  | JTV1        | 7p22         |
| 222221_x_at  | 0.99 | 0.95 | P     | 421.67  | 0.41 | 0.01 | P     | 169.60  | EHD1        | 11q13        |
| 205322_s_at  | 0.99 | 0.94 | P     | 233.73  | 0.41 | 0.00 | A     | 93.87   | MTF1        | 1p33         |
| 1554627_a_at | 0.99 | 0.93 | P     | 660.53  | 0.41 | 0.01 | P     | 267.97  | ASCC1       | 10pter-q25.3 |
| 201948_at    | 1.00 | 0.97 | P     | 1252.87 | 0.41 | 0.00 | P     | 504.50  | HUMAUJANTIG | 1p34.2       |
| 209733_at    | 0.99 | 0.94 | P     | 91.17   | 0.41 | 0.00 | P,A   | 36.77   | LOC286440   | xq22.3       |
| 202880_s_at  | 1.00 | 0.97 | P     | 234.90  | 0.41 | 0.00 | P     | 94.40   | PSCD1       | 17q25        |
| 230815_at    | 1.00 | 0.97 | P     | 66.53   | 0.41 | 0.01 | P,A   | 27.00   |             | 9q22.1       |
| 201867_s_at  | 0.99 | 0.94 | P     | 134.13  | 0.41 | 0.00 | A     | 54.13   | TBL1X       | xp22.3       |
| 223152_at    | 0.99 | 0.94 | P     | 161.00  | 0.41 | 0.00 | P     | 65.10   | PPP1R12C    | 19q13.42     |
| 213852_at    | 1.00 | 0.96 | P     | 904.67  | 0.41 | 0.01 | P     | 366.20  | RBM8A       | 1q12         |
| 204404_at    | 1.00 | 0.98 | P     | 1186.20 | 0.41 | 0.00 | P     | 479.27  | SLC12A2     | 5q23.3       |
| 242056_at    | 1.00 | 0.98 | P     | 226.20  | 0.41 | 0.00 | P     | 91.20   | TRIM45      | 1p12         |
| 202981_x_at  | 1.00 | 0.99 | P     | 826.43  | 0.41 | 0.00 | P     | 333.37  | SLAH1       | 16q12        |
| 36019_at     | 1.00 | 0.99 | P     | 611.80  | 0.41 | 0.00 | P     | 246.97  | STK19       | 6p21.3       |
| 202326_at    | 0.99 | 0.95 | P     | 261.63  | 0.41 | 0.01 | P     | 106.80  | BAT8        | 6p21.31      |
| 219596_at    | 1.00 | 0.99 | P     | 284.30  | 0.41 | 0.01 | P     | 115.40  | THAP10      | 15q22.32     |
| 224366_s_at  | 1.00 | 0.96 | P     | 621.30  | 0.41 | 0.00 | P     | 251.83  | REPS1       | 6q23.1-q24.1 |
| 240478_at    | 0.99 | 0.92 | P     | 269.20  | 0.41 | 0.00 | P     | 108.43  |             |              |
| 206088_at    | 0.99 | 0.93 | P     | 92.80   | 0.41 | 0.01 | A     | 37.87   | KIAA0563    | 17q21.32     |
| 238504_at    | 1.00 | 0.95 | P     | 251.43  | 0.41 | 0.01 | P     | 103.37  | C6orf57     | 6q13         |
| 216092_s_at  | 1.00 | 0.96 | P     | 126.93  | 0.41 | 0.00 | P     | 51.27   | SLC7A8      | 14q11.2      |
| 217784_at    | 1.00 | 0.99 | P     | 630.43  | 0.41 | 0.02 | P     | 258.37  | YKT6        | 7p15.1       |
| 207020_at    | 0.99 | 0.95 | P,M   | 127.60  | 0.41 | 0.01 | A     | 52.17   | HSF2BP      | 21q22.3      |
| 242423_x_at  | 0.99 | 0.94 | P     | 159.43  | 0.41 | 0.01 | P     | 65.13   |             |              |
| 1569335_a_at | 1.00 | 0.98 | P     | 77.47   | 0.41 | 0.01 | P,A   | 31.73   | FLJ12541    | 15q22.33     |
| 204285_s_at  | 0.99 | 0.95 | P     | 481.77  | 0.41 | 0.01 | P     | 195.90  | PMIAP1      | 18q21.32     |
| 223530_at    | 0.99 | 0.93 | P     | 229.27  | 0.41 | 0.03 | P     | 94.57   | TRDKH       | 1q21         |
| 212848_s_at  | 1.00 | 0.97 | P     | 239.57  | 0.41 | 0.00 | A     | 97.17   | C9orf3      | 9q22.33      |
| 243470_at    | 0.99 | 0.92 | P     | 38.57   | 0.41 | 0.02 | P,A   | 15.83   |             |              |
| 224156_x_at  | 1.00 | 0.97 | P,M   | 145.53  | 0.41 | 0.02 | A     | 59.87   | IL17RB      | 3p21.1       |
| 222688_at    | 1.00 | 0.99 | P     | 721.00  | 0.41 | 0.01 | P     | 294.53  | PHCA        | 11q13.3      |
| 212184_s_at  | 1.00 | 0.97 | P     | 335.80  | 0.41 | 0.01 | P     | 137.03  | MAP3K7IP2   | 6q25.1-q25.3 |
| 204333_s_at  | 1.00 | 0.99 | P     | 223.33  | 0.41 | 0.00 | P     | 90.73   | AGA         | 4q32-q33     |
| 215696_s_at  | 1.00 | 0.98 | P     | 1116.87 | 0.41 | 0.00 | P     | 453.23  | KIAA0310    | 9q34.3       |
| 1557433_at   | 1.00 | 0.98 | P     | 146.47  | 0.41 | 0.00 | P     | 59.50   |             |              |
| 209575_at    | 1.00 | 0.97 | P     | 523.67  | 0.41 | 0.01 | P     | 212.63  | IL10RB      | 21q22.11     |
| 210128_s_at  | 0.99 | 0.95 | P,M,A | 95.67   | 0.41 | 0.03 | A     | 39.77   | LTB4R       | 14q11.2-q12  |
| 218795_at    | 0.99 | 0.95 | P     | 727.87  | 0.41 | 0.01 | P     | 295.43  | ACP6        | 1q21         |
| 225234_at    | 1.00 | 0.98 | P     | 622.10  | 0.41 | 0.00 | P     | 253.57  | CBL         | 11q23.3      |
| 235119_at    | 0.99 | 0.94 | P,M   | 77.47   | 0.41 | 0.01 | A     | 31.47   | TAF3        | 10p15.1      |
| 207700_s_at  | 0.98 | 0.91 | P     | 390.47  | 0.41 | 0.01 | P     | 160.53  | NCOA3       | 20q12        |
| 202870_s_at  | 1.00 | 0.99 | P     | 1667.47 | 0.41 | 0.00 | P     | 678.00  | CDC20       | 1p34.1       |
| 1556414_at   | 0.99 | 0.94 | P     | 34.33   | 0.41 | 0.00 | A     | 14.10   |             |              |
| 1559249_at   | 0.99 | 0.93 | P     | 132.73  | 0.41 | 0.01 | P     | 54.57   | SCA1        | 6p23         |
| 226702_at    | 1.00 | 0.98 | P     | 105.97  | 0.41 | 0.01 | P,A   | 43.27   | LOC129607   | 2p25.2       |
| 212014_x_at  | 0.99 | 0.93 | P     | 3124.70 | 0.41 | 0.00 | P     | 1280.47 | CD44        | 11p13        |
| 226726_at    | 0.98 | 0.91 | P     | 529.83  | 0.41 | 0.00 | P     | 217.07  | LOC129642   | 2p25.2       |
| 213671_s_at  | 1.00 | 0.99 | P     | 1516.47 | 0.41 | 0.01 | P     | 618.77  | MARS        | 12q13.2      |
| 225102_at    | 1.00 | 1.00 | P     | 874.00  | 0.41 | 0.00 | P     | 356.17  | MGLL        | 3q21.3       |
| 229700_at    | 0.98 | 0.91 | P     | 296.73  | 0.41 | 0.00 | P     | 121.53  | LOC148203   | 19p13.11     |
| 229551_x_at  | 1.00 | 0.97 | P     | 1215.73 | 0.41 | 0.00 | P     | 496.13  | ZNF367      | 9q22         |
| 211555_s_at  | 0.99 | 0.93 | P     | 98.97   | 0.41 | 0.01 | A     | 40.63   | GUCY1B3     | 4q31.3-q33   |
| 204565_at    | 1.00 | 0.96 | P     | 1159.97 | 0.41 | 0.00 | P     | 474.03  | THEM2       | 6p22.1       |
| 218067_s_at  | 1.00 | 0.99 | P     | 1717.20 | 0.41 | 0.01 | P     | 702.33  | FLJ10154    | 13q33.2      |
| 204238_s_at  | 0.99 | 0.93 | P     | 424.93  | 0.42 | 0.03 | P,A   | 176.80  | C6orf108    | 6p21.1       |
| 229983_at    | 1.00 | 0.95 | P     | 308.53  | 0.42 | 0.01 | P     | 126.57  | TIGD2       | 4q22.1       |
| 218927_s_at  | 1.00 | 0.96 | P     | 235.80  | 0.42 | 0.01 | P,M,A | 96.83   | CHST12      | 7p22         |
| 212032_s_at  | 1.00 | 0.98 | P     | 950.40  | 0.42 | 0.01 | P     | 390.17  | PTOV1       | 19q13.33     |
| 209908_s_at  | 0.98 | 0.91 | P     | 98.03   | 0.42 | 0.00 | P,M   | 40.27   | TGF82       | 1q41         |
| 243543_at    | 0.99 | 0.93 | P     | 80.47   | 0.42 | 0.03 | P     | 33.43   |             |              |
| 219751_at    | 1.00 | 0.98 | P     | 407.07  | 0.42 | 0.02 | P     | 167.57  | FLJ21148    | 16q13        |
| 244561_at    | 1.00 | 0.96 | P,A   | 122.90  | 0.42 | 0.00 | A     | 50.23   |             |              |
| 233506_at    | 0.99 | 0.95 | P,M,A | 136.37  | 0.42 | 0.01 | A     | 55.87   |             |              |
| 204752_x_at  | 1.00 | 0.99 | P     | 1246.77 | 0.42 | 0.00 | P     | 512.17  | ADPRTL2     | 14q11.2-q12  |
| 226046_at    | 1.00 | 0.97 | P     | 253.60  | 0.42 | 0.00 | P     | 103.97  | MAPK8       | 10q11.23     |
| 47560_at     | 1.00 | 0.95 | P     | 729.37  | 0.42 | 0.00 | P     | 298.03  | LPHN1       | 19p13.2      |
| 226756_at    | 1.00 | 0.96 | P     | 274.00  | 0.42 | 0.00 | P     | 112.73  | FLJ36031    | 7q22.2       |
| 221208_s_at  | 0.99 | 0.95 | P     | 366.57  | 0.42 | 0.01 | P     | 151.00  | FLJ23342    | 11q24.2      |
| 225344_at    | 0.99 | 0.95 | P     | 1763.03 | 0.42 | 0.00 | P     | 724.10  | NCOA7       | 6q22.33      |
| 219689_at    | 1.00 | 0.95 | P,A   | 90.50   | 0.42 | 0.02 | A     | 37.53   | LOC56920    | 3p21.31      |
| 223097_at    | 1.00 | 0.96 | P     | 929.73  | 0.42 | 0.00 | P     | 380.63  | ADPRHL2     | 1p34.3       |
| 238601_at    | 0.99 | 0.94 | P     | 173.93  | 0.42 | 0.00 | P     | 71.20   | PHKB        | 16q12-q13    |
| 227605_at    | 1.00 | 0.97 | P     | 228.87  | 0.42 | 0.00 | P     | 94.07   | SCYE1       | 4q25         |
| 213785_at    | 0.99 | 0.92 | P,M   | 161.40  | 0.42 | 0.03 | A     | 66.93   | IPO9        | 1q32.1       |
| 236976_at    | 0.98 | 0.90 | P,M   | 155.70  | 0.42 | 0.01 | A     | 63.83   | FANCA       | 16q24.3      |
| 1563497_at   | 0.99 | 0.94 | P     | 67.13   | 0.42 | 0.01 | P,A   | 27.93   | USP25       | 21q11.2      |
| 200685_at    | 1.00 | 0.99 | P     | 335.97  | 0.42 | 0.02 | P     | 139.20  | SFRS11      | 1p31         |
| 213518_at    | 0.99 | 0.92 | P     | 757.60  | 0.42 | 0.00 | P     | 312.70  | PRKCI       | 3q26.3       |
| 225487_at    | 0.98 | 0.90 | P     | 114.00  | 0.42 | 0.01 | P     | 47.17   | TMEM18      | 2p25.3       |
| 205263_at    | 1.00 | 0.97 | P     | 836.80  | 0.42 | 0.00 | P     | 344.50  | BCL10       | 1p22         |
| 1557513_a_at | 1.00 | 0.96 | P     | 33.23   | 0.42 | 0.01 | M,A   | 13.80   |             |              |
| 238482_at    | 0.99 | 0.92 | P     | 92.10   | 0.42 | 0.00 | P     | 37.97   | KLF7        | 2q32         |
| 223655_at    | 0.99 | 0.94 | P     | 288.30  | 0.42 | 0.00 | P     | 119.63  | M160        | 12p13.31     |
| 237043_at    | 0.99 | 0.92 | P     | 247.23  | 0.42 | 0.02 | A     | 103.20  |             |              |
| 238761_at    | 0.98 | 0.90 | P     | 420.90  | 0.42 | 0.00 | P     | 174.07  |             |              |
| 221211_s_at  | 1.00 | 0.96 | P,A   | 25.43   | 0.42 | 0.02 | A     | 10.67   | C21orf7     | 21q22.3      |
| 240869_at    | 0.99 | 0.93 | P     | 127.87  | 0.42 | 0.00 | P     | 52.87   |             |              |
| 218712_at    | 0.99 | 0.93 | P     | 769.27  | 0.42 | 0.01 | P     | 319.07  | FLJ20508    | 1p34.2       |
| 204365_s_at  | 1.00 | 0.95 | P     | 167.90  | 0.42 | 0.00 | A     | 69.03   | C2orf23     | 2p11.2       |

|              |      |      |       |         |      |      |       |         |           |                 |
|--------------|------|------|-------|---------|------|------|-------|---------|-----------|-----------------|
| 232489_at    | 1.00 | 0.98 | P     | 132.83  | 0.42 | 0.01 | P     | 54.97   | FLJ10287  | 1pter-q31.3     |
| 233952_s_at  | 0.99 | 0.92 | P     | 620.87  | 0.42 | 0.01 | P     | 257.90  | ZNF295    | 21q22.3         |
| 207023_x_at  | 0.99 | 0.92 | P     | 2815.17 | 0.42 | 0.00 | P     | 1154.73 | KRT10     | 17q21           |
| 219165_at    | 0.99 | 0.94 | P     | 194.43  | 0.42 | 0.01 | P     | 80.73   | PDLIM2    | 8p21.2          |
| 218379_at    | 0.99 | 0.95 | P     | 738.77  | 0.42 | 0.00 | P     | 305.50  | RBM7      | 11q23.1-q23.2   |
| 219286_s_at  | 1.00 | 0.95 | P     | 768.53  | 0.42 | 0.01 | P     | 317.80  | RBM15     | 1p13            |
| 229312_s_at  | 0.99 | 0.93 | P     | 102.37  | 0.42 | 0.01 | P,M   | 42.60   | GKAP1     | 9q22.1          |
| 204063_s_at  | 0.99 | 0.94 | P,M   | 59.50   | 0.42 | 0.03 | A     | 25.23   | ULK2      | 17p11.2         |
| 235381_at    | 1.00 | 0.99 | P     | 467.80  | 0.42 | 0.01 | P     | 193.53  | HBXAP     | 11q13.4         |
| 230421_at    | 1.00 | 0.96 | P     | 118.83  | 0.42 | 0.02 | P,A   | 50.03   |           | 5q35.3          |
| 202417_at    | 1.00 | 0.97 | P     | 1660.53 | 0.42 | 0.00 | P     | 685.27  | KEAP1     | 19p13.2         |
| 209098_s_at  | 0.98 | 0.90 | P     | 87.30   | 0.42 | 0.01 | P     | 36.53   | JAG1      | 20p12.1-p11.23  |
| 1555977_at   | 0.99 | 0.95 | P     | 203.33  | 0.42 | 0.01 | P     | 84.70   | MRCL3     | 18p11.31        |
| 225112_at    | 1.00 | 0.99 | P     | 873.60  | 0.42 | 0.01 | P     | 362.63  | ABI2      | 2q33            |
| 225446_at    | 0.99 | 0.93 | P     | 169.63  | 0.42 | 0.01 | P     | 70.93   | C21orf107 | 21q22.2         |
| 1552562_at   | 1.00 | 0.96 | P     | 72.13   | 0.42 | 0.02 | A     | 30.23   | ZNF570    | 19q13.13        |
| 37425_g_at   | 1.00 | 0.95 | P     | 343.37  | 0.42 | 0.00 | P     | 142.03  | C6orf18   | 6p21.3          |
| 225198_at    | 1.00 | 0.95 | P     | 611.10  | 0.42 | 0.00 | P     | 254.97  | VAPA      | 18p11.22        |
| 207039_at    | 1.00 | 0.96 | P     | 618.23  | 0.42 | 0.03 | P     | 259.50  | CDKN2A    | 9p21            |
| 211580_s_at  | 1.00 | 0.96 | P     | 104.57  | 0.42 | 0.00 | A     | 43.57   | PIK3R3    | 1p34.1          |
| 215235_at    | 0.99 | 0.95 | P     | 879.47  | 0.42 | 0.01 | P     | 365.80  | SPTAN1    | 9q33-q34        |
| 231569_at    | 0.99 | 0.94 | P     | 112.87  | 0.42 | 0.03 | A     | 48.10   | MGC39655  | xq22.2          |
| 209835_x_at  | 0.99 | 0.94 | P     | 3465.00 | 0.42 | 0.00 | P     | 1447.17 | CD44      | 11p13           |
| 215287_at    | 0.99 | 0.93 | P     | 141.53  | 0.42 | 0.00 | P     | 59.10   |           |                 |
| 220941_s_at  | 0.99 | 0.92 | P     | 313.23  | 0.42 | 0.01 | P     | 129.83  | C21orf91  | 21q21.1         |
| 204203_at    | 1.00 | 0.97 | P     | 371.37  | 0.42 | 0.00 | P     | 154.87  | CEBPG     | 19q13.12        |
| 222360_at    | 1.00 | 0.96 | P     | 123.97  | 0.42 | 0.00 | P     | 51.63   | CGI-30    | 1p21.2          |
| 205167_s_at  | 0.99 | 0.92 | P     | 160.83  | 0.42 | 0.03 | P     | 68.50   | CDC25C    | 5q31            |
| 204686_at    | 1.00 | 0.98 | P     | 166.80  | 0.42 | 0.02 | P     | 70.23   | IRS1      | 2q36            |
| 203154_s_at  | 1.00 | 0.98 | P,A   | 470.63  | 0.42 | 0.01 | A     | 197.00  | PAK4      | 19q13.2         |
| 200843_s_at  | 1.00 | 0.98 | P     | 1057.90 | 0.42 | 0.01 | P     | 441.83  | EPRS      | 1q41-q42        |
| 218314_s_at  | 1.00 | 0.98 | P     | 322.30  | 0.42 | 0.01 | P     | 136.00  | FLJ10726  | 11q23.2         |
| 207621_s_at  | 1.00 | 0.99 | P     | 268.03  | 0.42 | 0.00 | P     | 111.73  | PEMT      | 17p11.2         |
| 204794_at    | 1.00 | 0.96 | P,M,A | 153.37  | 0.42 | 0.02 | A     | 65.27   | DUSP2     | 2q11            |
| 225192_at    | 0.99 | 0.94 | P     | 503.70  | 0.42 | 0.00 | P     | 209.40  | C10orf46  | 10q26.13        |
| 227689_at    | 1.00 | 0.96 | P     | 183.97  | 0.42 | 0.00 | P     | 76.97   | ZNF227    | 19q13.32        |
| 1566403_at   | 0.99 | 0.93 | P     | 68.93   | 0.42 | 0.01 | P,A   | 28.80   | RNU68     | 19p13           |
| 201000_at    | 1.00 | 0.99 | P     | 866.33  | 0.42 | 0.00 | P,A   | 361.53  | AARS      | 16q22           |
| 203818_s_at  | 1.00 | 0.97 | P     | 790.70  | 0.42 | 0.00 | P     | 329.60  | SF3A3     | 1p34.2          |
| 203218_at    | 1.00 | 0.97 | P     | 822.80  | 0.42 | 0.00 | P     | 344.07  | MAPK9     | 5q35            |
| 203345_s_at  | 1.00 | 0.98 | P     | 635.20  | 0.42 | 0.00 | P     | 265.33  | M96       | 1p22.1          |
| 229464_at    | 0.99 | 0.94 | P     | 62.60   | 0.42 | 0.01 | P,A   | 26.30   | MYEF2     | 15q15.2         |
| 218502_s_at  | 1.00 | 0.98 | P     | 339.13  | 0.42 | 0.00 | P     | 141.70  | TRPS1     | 8q24.12         |
| 229134_at    | 1.00 | 0.98 | P     | 172.93  | 0.42 | 0.02 | P,A   | 72.87   |           |                 |
| 244354_at    | 1.00 | 0.96 | P     | 185.93  | 0.42 | 0.01 | P     | 78.13   |           |                 |
| 224646_x_at  | 1.00 | 0.99 | P     | 570.43  | 0.42 | 0.01 | P     | 239.43  | H19       | 11p15.5         |
| 231025_at    | 0.98 | 0.89 | P     | 67.23   | 0.42 | 0.02 | M,A   | 28.20   |           |                 |
| 225785_at    | 1.00 | 0.99 | P     | 672.73  | 0.43 | 0.00 | P     | 281.27  |           |                 |
| 206261_at    | 1.00 | 0.97 | P     | 169.70  | 0.43 | 0.02 | P     | 72.30   | ZNF239    | 10q11.22-q11.23 |
| 204547_at    | 1.00 | 0.99 | P     | 306.90  | 0.43 | 0.00 | P     | 128.73  | RAB40B    | 17q25.3         |
| 218187_s_at  | 1.00 | 0.96 | P     | 819.63  | 0.43 | 0.00 | P     | 344.30  | FLJ20989  | 8q24.3          |
| 213294_at    | 1.00 | 0.95 | P     | 794.00  | 0.43 | 0.00 | P     | 333.20  | FLJ38348  | 2p22.3          |
| 226380_at    | 1.00 | 0.96 | P     | 255.43  | 0.43 | 0.00 | P     | 106.77  | PTPN21    | 14q31.3         |
| 230141_at    | 1.00 | 0.97 | P     | 72.30   | 0.43 | 0.00 | P     | 30.30   | ARID4A    | 14q22.3-q23.1   |
| 202737_s_at  | 1.00 | 0.98 | P     | 2769.13 | 0.43 | 0.00 | P     | 1160.93 | LSM4      | 19p13.11        |
| 212482_at    | 0.99 | 0.92 | P     | 463.97  | 0.43 | 0.01 | P     | 196.23  | FLJ13910  | 2p11.2          |
| 219866_at    | 1.00 | 0.98 | P     | 99.10   | 0.43 | 0.00 | A     | 41.60   | CLIC5     | 6p12.1-21.1     |
| 210365_at    | 0.99 | 0.95 | P     | 89.47   | 0.43 | 0.00 | P,A   | 37.63   | RUNX1     | 21q22.3         |
| 228751_at    | 1.00 | 0.96 | P     | 195.03  | 0.43 | 0.03 | P     | 82.73   | CLK4      | 5q35            |
| 213421_x_at  | 1.00 | 0.97 | P     | 139.27  | 0.43 | 0.00 | A     | 58.47   | PRSS3     | 9p11.2          |
| 1558896_at   | 0.99 | 0.92 | P,A   | 135.63  | 0.43 | 0.02 | M,A   | 57.43   |           |                 |
| 202315_s_at  | 1.00 | 0.99 | P     | 408.20  | 0.43 | 0.01 | P     | 171.97  | BCR       | 22q11.23        |
| 207605_x_at  | 1.00 | 0.95 | P,A   | 174.60  | 0.43 | 0.02 | A     | 73.80   | ZNF117    | 7q11.2          |
| 210046_s_at  | 0.99 | 0.95 | P     | 980.70  | 0.43 | 0.00 | P     | 413.73  | IDH2      | 15q26.1         |
| 201324_at    | 0.99 | 0.93 | P     | 1084.67 | 0.43 | 0.02 | P     | 463.03  | EMP1      | 12p12.3         |
| 235837_at    | 1.00 | 0.96 | P     | 202.10  | 0.43 | 0.00 | P,M,A | 85.57   |           |                 |
| 203752_s_at  | 1.00 | 0.98 | P     | 2373.27 | 0.43 | 0.00 | P     | 999.07  | JUND      | 19p13.2         |
| 211711_s_at  | 1.00 | 0.98 | P     | 244.00  | 0.43 | 0.00 | P     | 102.87  | PTEN      | 10q23.3         |
| 203825_at    | 0.99 | 0.94 | P     | 571.40  | 0.43 | 0.02 | P     | 243.60  | BRD3      | 9q34            |
| 204505_s_at  | 1.00 | 0.99 | P     | 130.40  | 0.43 | 0.01 | A     | 55.57   | EPB49     | 8p21.1          |
| 1556026_at   | 0.99 | 0.92 | P     | 27.90   | 0.43 | 0.02 | P,A   | 11.83   | IDS       | Xq28            |
| 1554093_a_at | 1.00 | 0.98 | P     | 567.93  | 0.43 | 0.00 | P     | 239.63  | SNAPC5    | 15q22.2         |
| 227630_at    | 1.00 | 0.95 | P     | 275.67  | 0.43 | 0.03 | P     | 117.53  | PPP2R5E   | 14q23.1         |
| 227443_at    | 1.00 | 0.97 | P,A   | 152.70  | 0.43 | 0.01 | A     | 65.07   | C9orf150  | 9p22.3          |
| 1558809_s_at | 0.98 | 0.91 | P     | 77.67   | 0.43 | 0.02 | P,A   | 33.50   | LOC284408 | 19q13.13        |
| 232014_at    | 1.00 | 0.97 | P     | 104.47  | 0.43 | 0.01 | P     | 44.33   | ZNF30     | 19q13.13        |
| 235660_at    | 1.00 | 0.97 | P     | 100.27  | 0.43 | 0.00 | A     | 42.40   |           |                 |
| 206659_at    | 0.98 | 0.90 | P     | 69.27   | 0.43 | 0.03 | A     | 29.93   | FLJ14082  | 2q11.2          |
| 236525_at    | 1.00 | 0.95 | P,M,A | 45.63   | 0.43 | 0.02 | A     | 19.77   | FBXO36    | 2q37.1          |
| 226649_at    | 1.00 | 0.97 | P     | 311.30  | 0.43 | 0.01 | P     | 131.83  | PANK1     | 10q23.31        |
| 1560028_at   | 0.98 | 0.90 | P     | 83.97   | 0.43 | 0.01 | P,M,A | 35.90   | FLJ10726  | 11q23.2         |
| 227920_at    | 1.00 | 0.96 | P     | 340.50  | 0.43 | 0.01 | P     | 145.03  | KIAA1553  | 6q21            |
| 204165_at    | 0.99 | 0.95 | P     | 528.27  | 0.43 | 0.00 | P     | 224.47  | WASF1     | 6q21-q22        |
| 1564651_at   | 1.00 | 0.96 | P     | 144.83  | 0.43 | 0.00 | P     | 61.73   | LOC221710 | 6p24.1          |
| 208634_s_at  | 1.00 | 0.99 | P     | 1621.07 | 0.43 | 0.00 | P     | 687.77  | MACF1     | 1p32-p31        |
| 230647_at    | 0.99 | 0.95 | P,A   | 96.00   | 0.43 | 0.00 | A     | 40.63   | FLJ10597  | 1p34.1          |
| 226568_at    | 1.00 | 0.96 | P     | 203.47  | 0.43 | 0.00 | P     | 86.60   | LOC284611 | 1p13.3          |
| 209678_s_at  | 1.00 | 0.96 | P     | 2050.80 | 0.43 | 0.00 | P     | 872.60  | PRKC1     | 3q26.3          |
| 230588_s_at  | 0.99 | 0.94 | P     | 238.53  | 0.43 | 0.01 | P     | 101.57  | LOC285074 | 2p11.1          |
| 230433_at    | 0.99 | 0.93 | P     | 112.50  | 0.43 | 0.00 | P,M,A | 47.77   |           | 1p22.1          |
| 204306_s_at  | 1.00 | 0.96 | P     | 580.37  | 0.43 | 0.01 | P     | 246.87  | CD151     | 11p15.5         |
| 217604_at    | 0.99 | 0.92 | P     | 227.90  | 0.43 | 0.03 | P     | 97.77   |           |                 |
| 222612_at    | 1.00 | 0.95 | P     | 240.57  | 0.43 | 0.00 | P     | 102.27  | PSPC1     | 13q12.11        |
| 227706_at    | 0.99 | 0.92 | P,M,A | 101.83  | 0.43 | 0.00 | A     | 43.70   | SPIRE2    | 16q24           |
| 209153_s_at  | 1.00 | 0.98 | P     | 484.20  | 0.43 | 0.02 | P     | 207.73  | TCF3      | 19p13.3         |
| 229955_at    | 1.00 | 0.96 | P     | 263.70  | 0.43 | 0.00 | P     | 113.13  | FBXO3     | 11p13           |

|              |      |      |       |         |      |      |       |         |               |                |
|--------------|------|------|-------|---------|------|------|-------|---------|---------------|----------------|
| 229982_at    | 0.99 | 0.93 | P     | 1935.67 | 0.43 | 0.00 | P     | 831.20  | FLJ21924      | 11p13          |
| 202289_s_at  | 1.00 | 0.97 | P     | 281.60  | 0.43 | 0.01 | P     | 120.20  | TACC2         | 10q26          |
| 243515_at    | 1.00 | 0.97 | P     | 97.63   | 0.43 | 0.00 | P     | 41.63   | C22orf23      | 22q13.1        |
| 214092_x_at  | 1.00 | 0.98 | P     | 368.97  | 0.43 | 0.00 | P     | 157.37  | SFRS14        | 19p12          |
| 218060_s_at  | 1.00 | 0.97 | P     | 547.80  | 0.43 | 0.01 | P     | 235.37  | FLJ13154      | 16q13          |
| 221219_s_at  | 1.00 | 0.96 | P     | 273.77  | 0.43 | 0.00 | P     | 116.87  | DKFZp434G0522 | 16q24.3        |
| 220933_s_at  | 1.00 | 0.98 | P     | 241.00  | 0.43 | 0.01 | P     | 103.03  | ZCCHC6        | 9q21           |
| 206240_s_at  | 0.99 | 0.94 | P     | 161.63  | 0.43 | 0.01 | P     | 69.33   | ZNF136        | 19p13.2-p13.12 |
| 208407_s_at  | 1.00 | 0.99 | P     | 875.97  | 0.43 | 0.01 | P     | 375.50  | CTNND1        | 11q11          |
| 208809_s_at  | 1.00 | 0.99 | P     | 1754.23 | 0.43 | 0.02 | P     | 754.00  | C6orf62       | 6p22.1         |
| 219966_x_at  | 1.00 | 0.96 | P     | 486.80  | 0.43 | 0.02 | P     | 209.03  | BANP          | 16q24          |
| 225673_at    | 1.00 | 0.98 | P     | 1577.30 | 0.43 | 0.01 | P     | 673.80  | MYADM         | 19q13.42       |
| 222472_at    | 1.00 | 0.97 | P     | 687.10  | 0.43 | 0.00 | P     | 292.80  | AFTIPHILIN    | 2p15           |
| 225441_x_at  | 1.00 | 0.97 | P     | 690.03  | 0.43 | 0.00 | P     | 294.50  | MGC14151      | 17p13.2        |
| 227246_at    | 0.99 | 0.93 | P     | 211.77  | 0.43 | 0.01 | P     | 91.00   | PLRG1         | 4q31.2-q32.1   |
| 203162_s_at  | 1.00 | 0.97 | P     | 929.33  | 0.43 | 0.00 | P     | 396.37  | KATNB1        | 16q13          |
| 206600_s_at  | 1.00 | 0.98 | P     | 223.20  | 0.43 | 0.01 | A     | 95.60   | SLC16A5       | 17q25.2        |
| 204512_at    | 0.99 | 0.93 | P     | 237.83  | 0.44 | 0.01 | P     | 102.40  | HIVEP1        | 6p24-p22.3     |
| 230127_at    | 1.00 | 0.98 | P     | 85.83   | 0.44 | 0.01 | P     | 36.80   |               |                |
| 202207_at    | 0.99 | 0.94 | P     | 167.03  | 0.44 | 0.01 | M,A   | 72.47   | ARL7          | 2q37.2         |
| 226261_at    | 1.00 | 0.96 | P     | 131.80  | 0.44 | 0.01 | P     | 56.80   | ZNRF2         | 7p15.1         |
| 204142_at    | 1.00 | 0.96 | P     | 1013.77 | 0.44 | 0.02 | P     | 436.07  | HSRTS BETA    | 18p11.32       |
| 204710_s_at  | 1.00 | 0.98 | P     | 1245.33 | 0.44 | 0.00 | P     | 533.33  | DKFZP434J154  | 7p22.2         |
| 226151_x_at  | 1.00 | 0.97 | P     | 307.77  | 0.44 | 0.01 | P     | 132.20  | CRYZL1        | 21q21.3        |
| 219147_s_at  | 1.00 | 0.99 | P     | 354.33  | 0.44 | 0.00 | P     | 151.97  | C9orf95       | 9q21.31        |
| 225679_at    | 1.00 | 0.97 | P     | 678.10  | 0.44 | 0.00 | P     | 291.00  | C14orf35      | 14q22.3        |
| 214775_at    | 0.99 | 0.93 | P     | 82.40   | 0.44 | 0.03 | P,M   | 36.33   | N4BP3         | 5q35.3         |
| 228498_at    | 0.98 | 0.90 | P     | 837.60  | 0.44 | 0.02 | P     | 363.40  | B4GALT1       | 9p13           |
| 208713_at    | 1.00 | 0.97 | P     | 1738.87 | 0.44 | 0.00 | P     | 745.70  | HNRPUL1       | 19q13.31       |
| 202847_at    | 1.00 | 0.98 | P     | 416.60  | 0.44 | 0.01 | P     | 178.87  | PKC2          | 14q11.2        |
| 226850_at    | 1.00 | 0.99 | P     | 403.53  | 0.44 | 0.00 | P     | 173.17  | SUMF1         | 3p26.2         |
| 233609_at    | 0.99 | 0.95 | P,A   | 32.37   | 0.44 | 0.03 | A     | 14.17   | PTPRK         | 6q22.2-23.1    |
| 203243_s_at  | 0.99 | 0.93 | P     | 1289.30 | 0.44 | 0.00 | P     | 555.80  | LIM           | 4q22           |
| 218751_s_at  | 1.00 | 0.97 | P     | 69.90   | 0.44 | 0.02 | P,M   | 30.27   | FBXW7         | 4q31.3         |
| 213407_at    | 1.00 | 0.96 | P     | 306.97  | 0.44 | 0.01 | P,M   | 132.03  | KIAA0931      | 16q22.2        |
| 223162_s_at  | 1.00 | 0.97 | P     | 514.03  | 0.44 | 0.00 | P     | 220.67  | LCHN          | 7q34           |
| 238587_at    | 1.00 | 0.97 | P     | 274.30  | 0.44 | 0.01 | P     | 118.40  | KIAA1959      | 11q24.1        |
| 223350_x_at  | 0.98 | 0.90 | P     | 1893.97 | 0.44 | 0.01 | P     | 814.77  | LIN7C         | 11p14          |
| 217369_at    | 0.99 | 0.95 | M,A   | 124.93  | 0.44 | 0.02 | P     | 54.53   |               |                |
| 231864_at    | 0.98 | 0.90 | P     | 319.00  | 0.44 | 0.02 | P     | 138.03  | ZNF33A        | 10p11.2        |
| 50376_at     | 0.99 | 0.94 | P     | 375.53  | 0.44 | 0.00 | P     | 161.07  | ZNF444        | 19q13.43       |
| 212955_s_at  | 1.00 | 0.99 | P     | 1482.67 | 0.44 | 0.00 | P     | 637.60  | POLR2I        | 19q12          |
| 225835_at    | 1.00 | 0.99 | P     | 1300.03 | 0.44 | 0.02 | P     | 562.40  | SLC12A2       | 5q23.3         |
| 225781_at    | 1.00 | 0.97 | P     | 296.70  | 0.44 | 0.01 | P     | 129.03  | MAPK9         | 5q35           |
| 226099_at    | 1.00 | 0.98 | P     | 428.67  | 0.44 | 0.00 | P     | 184.77  | ELL2          | 5q15           |
| 226604_at    | 1.00 | 0.99 | P     | 371.87  | 0.44 | 0.01 | P     | 160.30  | SMILE         | 12q21.33       |
| 202801_at    | 0.99 | 0.93 | P     | 1058.77 | 0.44 | 0.00 | P     | 454.67  | PRKACA        | 19p13.1        |
| 210800_at    | 0.98 | 0.90 | P     | 37.67   | 0.44 | 0.01 | P     | 16.33   | TIMM8A        | qx22.1         |
| 225638_at    | 1.00 | 0.97 | P     | 1147.60 | 0.44 | 0.02 | M,A   | 498.67  |               | 14q2.3         |
| 229063_s_at  | 0.99 | 0.92 | P     | 250.67  | 0.44 | 0.02 | P     | 108.47  | MGC31967      | 9p13.2         |
| 231981_at    | 1.00 | 0.98 | P     | 85.47   | 0.44 | 0.00 | P     | 36.93   | PRLR          | 5p14-p13       |
| 225589_at    | 1.00 | 0.97 | P     | 407.73  | 0.44 | 0.02 | P     | 177.83  | SH3MD2        | 4q32.3         |
| 213243_at    | 0.99 | 0.95 | P     | 338.33  | 0.44 | 0.02 | P     | 147.07  | COH1          | 8q22.2         |
| 201319_at    | 1.00 | 0.98 | P     | 1860.83 | 0.44 | 0.00 | P     | 803.27  | MRCL3         | 18p11.31       |
| 209007_s_at  | 1.00 | 0.96 | P     | 718.80  | 0.44 | 0.00 | P     | 310.13  | NPD014        | 1p36.13-p35.1  |
| 213203_at    | 1.00 | 0.97 | P     | 579.23  | 0.44 | 0.01 | P     | 251.00  | SNAPC5        | 15q22.2        |
| 225325_at    | 1.00 | 0.99 | P     | 834.13  | 0.44 | 0.01 | P     | 361.67  | FLJ20160      | 2q32.3         |
| 242143_at    | 0.98 | 0.90 | P     | 209.30  | 0.44 | 0.01 | P     | 90.30   |               |                |
| 223090_x_at  | 1.00 | 0.99 | P     | 819.57  | 0.44 | 0.01 | P     | 355.67  | VEZATIN       | 12q23.1        |
| 243736_at    | 1.00 | 0.95 | P,A   | 100.00  | 0.44 | 0.02 | A     | 43.97   |               |                |
| 229535_at    | 1.00 | 0.99 | P     | 296.33  | 0.44 | 0.00 | A     | 128.73  | LOC114971     | 11p11.2        |
| 232323_s_at  | 0.99 | 0.95 | P     | 302.50  | 0.44 | 0.00 | P     | 131.37  | TTC17         | 11p11.2        |
| 210580_x_at  | 1.00 | 0.97 | P     | 633.30  | 0.44 | 0.01 | P     | 274.63  | SULT1A3       | 16p11.2        |
| 226058_at    | 0.99 | 0.95 | P     | 67.93   | 0.44 | 0.00 | A     | 29.50   | MGC4655       | 16q22.1        |
| 203787_at    | 1.00 | 0.99 | P     | 252.20  | 0.44 | 0.00 | P     | 109.33  | SSBP2         | 5q14.1         |
| 218224_at    | 1.00 | 0.98 | P     | 269.77  | 0.44 | 0.00 | P     | 116.87  | PNMA1         | 14q24.2        |
| 218528_s_at  | 1.00 | 0.97 | P     | 1090.97 | 0.44 | 0.00 | P     | 473.20  | RNF38         | 9p13-p12       |
| 212856_at    | 1.00 | 0.95 | P     | 316.17  | 0.44 | 0.00 | P     | 136.67  | KIAA0767      | 22q13.31       |
| 232589_at    | 0.99 | 0.94 | P,A   | 108.23  | 0.44 | 0.02 | A     | 47.83   |               |                |
| 201620_at    | 1.00 | 0.95 | P     | 580.93  | 0.44 | 0.00 | P     | 252.60  | MBTPS1        | 16q24          |
| 230256_at    | 0.99 | 0.94 | P     | 392.03  | 0.44 | 0.03 | P     | 172.10  | FLJ35976      | 1q22           |
| 228282_at    | 0.99 | 0.95 | P     | 166.13  | 0.44 | 0.01 | P     | 72.57   |               |                |
| 212132_at    | 1.00 | 0.96 | P     | 839.77  | 0.44 | 0.02 | P     | 368.83  | C19orf13      | 19q13.12       |
| 215808_at    | 1.00 | 0.95 | P     | 107.80  | 0.44 | 0.02 | A     | 47.50   | KLK10         | 19q13.3-q13.4  |
| 205112_at    | 0.99 | 0.94 | P     | 87.80   | 0.44 | 0.00 | P,M,A | 38.33   | PLCE1         | 10q23          |
| 202054_s_at  | 1.00 | 0.98 | P     | 244.87  | 0.44 | 0.02 | P     | 107.27  | ALDH3A2       | 17p11.2        |
| 1552767_a_at | 0.99 | 0.93 | P,A   | 30.20   | 0.44 | 0.01 | A     | 13.37   | HS6ST2        | qx26.2         |
| 220056_at    | 0.99 | 0.94 | P     | 64.53   | 0.44 | 0.03 | P,A   | 28.77   | IL22RA1       | 1p36.11        |
| 228029_at    | 0.99 | 0.94 | P     | 333.13  | 0.44 | 0.00 | P     | 145.07  | KIAA1982      | 4p16.3         |
| 227754_at    | 0.99 | 0.94 | P     | 227.63  | 0.44 | 0.02 | P     | 100.13  | USP54         | 10q22.3        |
| 221988_at    | 1.00 | 0.97 | P     | 237.50  | 0.44 | 0.01 | P     | 103.47  |               |                |
| 204658_at    | 1.00 | 0.97 | P     | 615.93  | 0.44 | 0.00 | P     | 268.80  | TRA2A         | 7p15.3         |
| 228650_at    | 0.99 | 0.93 | P     | 364.10  | 0.44 | 0.00 | P     | 157.87  |               |                |
| 209507_at    | 1.00 | 0.98 | P     | 1689.57 | 0.44 | 0.00 | P     | 737.47  | RPA3          | 7p22           |
| 224923_at    | 0.99 | 0.91 | P     | 181.47  | 0.44 | 0.01 | P     | 79.00   | TTC7          | 2p21           |
| 224849_at    | 0.99 | 0.94 | P     | 779.47  | 0.44 | 0.00 | P     | 341.80  | TTC17         | 11p11.2        |
| 225649_s_at  | 1.00 | 0.96 | P     | 673.67  | 0.44 | 0.01 | P     | 293.77  | STK35         | 20p13          |
| 219826_at    | 1.00 | 0.98 | P,M,A | 294.87  | 0.44 | 0.00 | A     | 128.60  | FLJ23233      | 19q13.43       |
| 223808_s_at  | 1.00 | 0.99 | P     | 620.43  | 0.44 | 0.00 | P     | 270.77  | LOC114971     | 11p11.2        |
| 217728_at    | 1.00 | 0.97 | P     | 6847.63 | 0.44 | 0.00 | P     | 2994.27 | S100A6        | 1q21           |
| 200860_s_at  | 1.00 | 0.98 | P     | 2120.60 | 0.44 | 0.00 | P     | 926.23  | KIAA1007      | 16q13          |
| 207160_at    | 0.99 | 0.92 | P,A   | 20.43   | 0.44 | 0.02 | A     | 9.07    | IL12A         | 3p12-q13.2     |
| 207125_at    | 0.99 | 0.94 | P     | 36.10   | 0.44 | 0.01 | P,A   | 15.90   | ZNF225        | 19q13.2        |
| 201955_at    | 1.00 | 0.96 | P     | 2512.83 | 0.44 | 0.00 | P     | 1099.90 | CGNC          | 6q21           |
| 235457_at    | 1.00 | 0.98 | P     | 712.03  | 0.44 | 0.01 | P     | 312.00  | MAML2         | 11q21          |
| 229711_s_at  | 1.00 | 0.99 | P     | 325.80  | 0.44 | 0.01 | P     | 142.70  | MGC5370       | 12q14.3        |



|              |      |      |     |         |      |      |       |         |               |                |
|--------------|------|------|-----|---------|------|------|-------|---------|---------------|----------------|
| 204327_s_at  | 1.00 | 0.99 | P   | 225.67  | 0.44 | 0.00 | P     | 98.90   | ZNF202        | 11q23.3        |
| 218165_at    | 0.99 | 0.92 | P   | 1295.83 | 0.44 | 0.00 | P     | 567.90  | FLJ11730      | 1p35.3-p33     |
| 1554724_at   | 1.00 | 0.95 | P,A | 28.70   | 0.44 | 0.00 | A     | 12.63   | SLC6A11       | 3p25.3         |
| 242826_at    | 0.99 | 0.94 | P   | 148.57  | 0.45 | 0.03 | P,A   | 65.97   |               |                |
| 216863_s_at  | 0.99 | 0.93 | P   | 365.57  | 0.45 | 0.00 | P     | 161.57  | ZCWCC1        | 22q12.2        |
| 202524_s_at  | 0.99 | 0.95 | P   | 95.80   | 0.45 | 0.01 | P,A   | 42.27   | SPOCK2        | 10pter-q25.3   |
| 200975_at    | 1.00 | 0.98 | P   | 3509.20 | 0.45 | 0.00 | P     | 1538.93 | PPT1          | 1p32           |
| 225534_at    | 1.00 | 0.97 | P   | 672.87  | 0.45 | 0.00 | P     | 295.60  | LOC114926     | 8p11.21        |
| 225474_at    | 0.99 | 0.95 | P,A | 133.40  | 0.45 | 0.01 | A     | 59.00   | BAIAP1        | 3p14.1         |
| 202094_at    | 1.00 | 0.96 | P   | 657.10  | 0.45 | 0.01 | P     | 289.30  | BIRC5         | 17q25          |
| 202275_at    | 0.99 | 0.94 | P   | 1081.23 | 0.45 | 0.01 | P     | 476.67  | G6PD          | xq28           |
| 225120_at    | 1.00 | 0.97 | P   | 968.17  | 0.45 | 0.01 | P     | 426.17  | PURB          | 7p13           |
| 225716_at    | 1.00 | 0.95 | P   | 1205.17 | 0.45 | 0.01 | P     | 531.87  |               |                |
| 226236_at    | 1.00 | 0.96 | P   | 1615.77 | 0.45 | 0.02 | P     | 716.73  |               | 20p11.23       |
| 209179_s_at  | 1.00 | 0.96 | P   | 717.47  | 0.45 | 0.01 | P     | 317.33  | LENG4         | 19q13.4        |
| 227624_at    | 1.00 | 0.95 | P   | 267.53  | 0.45 | 0.01 | P     | 118.17  | KIAA1546      | 4q24           |
| 202266_at    | 1.00 | 0.97 | P   | 1899.17 | 0.45 | 0.00 | P     | 836.43  | TTRAP         | 6p22.3-p22.1   |
| 214960_at    | 1.00 | 0.95 | P   | 298.70  | 0.45 | 0.03 | P     | 132.53  | API5          | 11p12-q12      |
| 226336_at    | 1.00 | 0.97 | P   | 1456.47 | 0.45 | 0.00 | P     | 642.73  | PIPA          | 7p13-p11.2     |
| 209094_at    | 1.00 | 0.98 | P   | 1082.07 | 0.45 | 0.00 | P     | 476.40  | DDAH1         | 1p22           |
| 228027_at    | 1.00 | 0.98 | P,M | 251.27  | 0.45 | 0.00 | A     | 110.53  | LOC114928     | xq22.1         |
| 202772_at    | 1.00 | 0.98 | P,A | 228.67  | 0.45 | 0.00 | A     | 100.77  | HMGCL         | 1p36.1-p35     |
| 1558755_x_at | 0.99 | 0.95 | P   | 69.87   | 0.45 | 0.01 | P,M   | 31.03   | LOC284390     | 19p13.2        |
| 1556725_a_at | 1.00 | 0.95 | P   | 102.47  | 0.45 | 0.01 | P,A   | 45.40   |               |                |
| 216733_s_at  | 0.99 | 0.95 | P,A | 62.93   | 0.45 | 0.03 | A     | 28.47   | GATM          | 15q15.1        |
| 232466_at    | 0.99 | 0.94 | P   | 118.67  | 0.45 | 0.03 | P     | 52.90   | CUL4A         | 13q34          |
| 218446_s_at  | 1.00 | 0.97 | P   | 313.37  | 0.45 | 0.01 | P     | 139.07  | FAM18B        | 17p11.2        |
| 215291_at    | 0.99 | 0.92 | P,A | 32.10   | 0.45 | 0.01 | A     | 14.20   | MKL1          | 22q13          |
| 201250_s_at  | 1.00 | 1.00 | P   | 558.90  | 0.45 | 0.00 | P     | 246.50  | SLC2A1        | 1p35-p31.3     |
| 1553704_x_at | 1.00 | 0.97 | P   | 490.60  | 0.45 | 0.01 | P     | 216.43  | FLJ90396      | 19p13.2        |
| 235679_at    | 1.00 | 0.96 | P   | 294.20  | 0.45 | 0.01 | P     | 131.17  |               |                |
| 238681_at    | 1.00 | 0.95 | P   | 141.27  | 0.45 | 0.01 | P     | 62.53   | FLJ37451      | 17q23.2        |
| 218931_at    | 0.99 | 0.95 | P   | 246.77  | 0.45 | 0.02 | A     | 109.20  | RAB17         | 2q37.3         |
| 226318_at    | 1.00 | 0.97 | P   | 252.80  | 0.45 | 0.00 | P,A   | 111.67  | TBRG1         | 11q24.2        |
| 242663_at    | 0.99 | 0.95 | P   | 105.80  | 0.45 | 0.00 | P     | 46.63   |               |                |
| 217223_s_at  | 1.00 | 0.99 | P   | 144.67  | 0.45 | 0.00 | A     | 63.93   | BCR           | 22q11.23       |
| 203744_at    | 1.00 | 0.97 | P   | 1740.60 | 0.45 | 0.00 | P     | 770.47  | HMGB3         | xq28           |
| 222457_s_at  | 1.00 | 0.96 | P   | 307.30  | 0.45 | 0.02 | P     | 136.80  | EPLIN         | 12q13          |
| 218797_s_at  | 1.00 | 0.96 | P   | 379.43  | 0.45 | 0.02 | P     | 168.73  | SIRT7         | 17q25          |
| 200797_s_at  | 1.00 | 0.96 | P   | 2722.87 | 0.45 | 0.00 | P     | 1200.90 | MCL1          | 1q21           |
| 208632_at    | 1.00 | 0.96 | P   | 305.67  | 0.45 | 0.01 | P     | 136.07  | RNF10         | 12q24.31       |
| 211475_s_at  | 0.99 | 0.95 | P   | 1194.50 | 0.45 | 0.00 | P     | 529.37  | BAG1          | 9p12           |
| 224897_at    | 1.00 | 0.95 | P   | 294.67  | 0.45 | 0.01 | P     | 130.80  | WDR26         | 1q42.12-q42.13 |
| 232336_at    | 1.00 | 0.96 | P   | 129.97  | 0.45 | 0.00 | A     | 57.43   | ZSWIM5        | 1p34.1         |
| 203015_s_at  | 0.99 | 0.95 | P   | 293.07  | 0.45 | 0.01 | P     | 130.50  | SSX2IP        | 1p22.3         |
| 219549_s_at  | 0.99 | 0.92 | P   | 1374.53 | 0.45 | 0.00 | P     | 611.63  | RTN3          | 11q13          |
| 217892_s_at  | 1.00 | 0.95 | P   | 1158.20 | 0.45 | 0.00 | P     | 514.80  | EPLIN         | 12q13          |
| 200710_at    | 1.00 | 0.97 | P   | 1147.67 | 0.45 | 0.00 | P     | 507.53  | ACADVL        | 17p13-p11      |
| 210959_s_at  | 0.99 | 0.93 | P   | 603.50  | 0.45 | 0.00 | P     | 268.80  | SRD5A1        | 5p15           |
| 225412_at    | 1.00 | 0.96 | P   | 428.00  | 0.45 | 0.00 | P     | 190.23  | FLJ14681      | 2q13           |
| 208940_at    | 0.99 | 0.92 | P   | 231.87  | 0.45 | 0.00 | M,A   | 102.63  | SEPHS1        | 10p14          |
| 202439_s_at  | 1.00 | 0.98 | P   | 259.33  | 0.45 | 0.00 | P     | 115.30  | IDS           | xq28           |
| 218986_s_at  | 0.99 | 0.95 | P   | 97.80   | 0.45 | 0.01 | P     | 43.67   | FLJ20035      | 4q32.3         |
| 218584_at    | 0.98 | 0.91 | P,A | 233.80  | 0.45 | 0.01 | A     | 103.63  | FLJ21127      | 12q24.13       |
| 226810_at    | 1.00 | 0.99 | P   | 562.40  | 0.45 | 0.00 | P     | 249.93  |               |                |
| 229057_at    | 0.99 | 0.94 | P   | 13.70   | 0.45 | 0.01 | A     | 6.17    |               |                |
| 32069_at     | 1.00 | 0.97 | P   | 479.93  | 0.45 | 0.00 | P     | 213.20  | N4BP1         | 16q12.1        |
| 224129_s_at  | 1.00 | 0.97 | P   | 1591.53 | 0.45 | 0.00 | P     | 708.30  | LOC84661      | 2p23.2         |
| 200779_at    | 1.00 | 0.99 | P   | 4872.90 | 0.45 | 0.00 | P     | 2168.00 | ATF4          | 22q13.1        |
| 213546_at    | 0.99 | 0.92 | P   | 285.97  | 0.45 | 0.00 | P     | 127.17  | DKFZp586h1420 | 7p15.1         |
| 204937_s_at  | 1.00 | 0.96 | P   | 757.13  | 0.45 | 0.00 | P     | 336.67  | ZNF274        | 19qter         |
| 212479_s_at  | 0.99 | 0.92 | P   | 306.30  | 0.45 | 0.01 | P     | 137.17  | FLJ13910      | 2p11.2         |
| 202365_at    | 1.00 | 0.97 | P   | 510.87  | 0.45 | 0.00 | P     | 227.33  | MGC5139       | 12q24.31       |
| 238653_at    | 1.00 | 0.98 | P   | 291.97  | 0.45 | 0.00 | P     | 130.10  | LRIG2         | 1p13.1         |
| 217940_s_at  | 1.00 | 0.95 | P   | 1006.63 | 0.45 | 0.01 | P     | 449.43  | FLJ10769      | 13q34          |
| 213204_at    | 0.99 | 0.93 | P   | 175.10  | 0.45 | 0.00 | P     | 77.70   | PARC          | 6p21.1         |
| 230339_at    | 0.99 | 0.92 | P   | 113.10  | 0.45 | 0.00 | P     | 50.23   | FLJ32745      | 2q12.3         |
| 221621_at    | 1.00 | 0.96 | P   | 175.20  | 0.45 | 0.01 | P     | 78.37   |               |                |
| 218720_x_at  | 0.99 | 0.94 | P   | 349.40  | 0.45 | 0.00 | M,A   | 155.77  | PSK-1         | 16p12.1        |
| 211528_x_at  | 1.00 | 0.97 | P   | 1477.00 | 0.45 | 0.01 | P     | 657.90  | HLA-C         | 6p21.3         |
| 224478_s_at  | 1.00 | 0.98 | P   | 464.37  | 0.45 | 0.00 | P     | 206.53  | MGC11257      | 7p22.3         |
| 223287_s_at  | 1.00 | 0.96 | P   | 175.30  | 0.45 | 0.00 | A     | 78.37   | FOXP1         | 3p14.1         |
| 1563051_at   | 0.99 | 0.94 | P   | 47.37   | 0.45 | 0.01 | P,A   | 21.10   | OSBP          | 11q12-q13      |
| 213221_s_at  | 1.00 | 0.97 | P   | 217.80  | 0.45 | 0.01 | P     | 97.30   | SIK2          | 11q23.2        |
| 205062_x_at  | 0.99 | 0.93 | P   | 178.13  | 0.45 | 0.02 | P     | 80.43   | ARID4A        | 14q22.3-q23.1  |
| 226838_at    | 0.99 | 0.93 | P   | 245.23  | 0.45 | 0.02 | P     | 109.53  |               | 2p24.3         |
| 219409_at    | 1.00 | 0.99 | P   | 260.93  | 0.45 | 0.00 | P     | 116.63  | SNIP1         | 1p34.2         |
| 215128_at    | 1.00 | 0.96 | P   | 258.77  | 0.45 | 0.00 | P     | 115.43  |               |                |
| 202901_x_at  | 0.99 | 0.94 | P   | 25.00   | 0.45 | 0.02 | P,A   | 11.40   | CTSS          | 1q21           |
| 225898_at    | 0.99 | 0.92 | P   | 238.87  | 0.45 | 0.01 | P     | 106.50  | FLJ12953      | 2p13.1         |
| 229606_at    | 1.00 | 0.95 | P   | 1543.33 | 0.45 | 0.00 | P     | 690.33  | PPP3CA        | 4q21-q24       |
| 213260_at    | 0.99 | 0.92 | P   | 254.57  | 0.45 | 0.01 | P     | 114.17  | FOXC1         | 6p25           |
| 210252_s_at  | 0.99 | 0.94 | P,M | 281.73  | 0.45 | 0.03 | A     | 127.50  | MADD          | 11p11.2        |
| 220956_s_at  | 0.99 | 0.92 | P   | 569.13  | 0.45 | 0.03 | P     | 257.33  | EGLN2         | 19q13.2        |
| 208771_s_at  | 1.00 | 0.99 | P   | 809.83  | 0.45 | 0.00 | P     | 361.97  | LTA4H         | 12q22          |
| 218669_at    | 0.99 | 0.95 | P   | 1165.00 | 0.45 | 0.01 | P     | 522.80  | RAP2C         | xq25           |
| 219481_at    | 1.00 | 0.98 | P   | 326.20  | 0.45 | 0.00 | P,A   | 145.93  | TTC13         | 1q42.2         |
| 236545_at    | 1.00 | 0.98 | P   | 122.37  | 0.45 | 0.01 | P     | 54.77   |               |                |
| 223389_s_at  | 1.00 | 0.96 | P   | 270.03  | 0.45 | 0.02 | P,M,A | 121.63  | ZNF581        | 19q13.43       |
| 203762_s_at  | 1.00 | 0.98 | P,M | 108.00  | 0.45 | 0.01 | A     | 48.60   | D2LIC         | 2p25.1-p24.1   |
| 225775_at    | 1.00 | 0.98 | P   | 110.73  | 0.45 | 0.00 | A     | 49.67   | MGC50844      | 7q32.3         |
| 226015_at    | 1.00 | 0.98 | P   | 360.40  | 0.45 | 0.00 | P     | 161.33  | ZNF325        | 7p22.2         |
| 244753_at    | 1.00 | 0.95 | P   | 181.87  | 0.45 | 0.02 | P     | 81.70   |               |                |
| 1552287_s_at | 0.99 | 0.93 | P   | 316.30  | 0.46 | 0.01 | P     | 142.53  | AFG3L1        | 16q24          |
| 205171_at    | 1.00 | 0.98 | P   | 262.87  | 0.46 | 0.00 | A     | 118.03  | PTPN4         | 2q14.2         |
| 238483_at    | 0.99 | 0.94 | P   | 20.20   | 0.46 | 0.00 | A     | 9.07    |               |                |

|              |      |      |       |         |      |      |       |         |               |                |
|--------------|------|------|-------|---------|------|------|-------|---------|---------------|----------------|
| 224802_at    | 0.99 | 0.93 | P     | 1340.17 | 0.46 | 0.01 | P     | 603.00  | NDFIP2        | 13q22.2        |
| 1556389_at   | 1.00 | 0.97 | P     | 92.07   | 0.46 | 0.01 | P,A   | 41.30   | TNRC5         | 6pter-p12.1    |
| 235507_at    | 1.00 | 0.96 | P     | 108.70  | 0.46 | 0.00 | P     | 48.80   | LOC115294     | 8q11.22        |
| 89476_r_at   | 1.00 | 0.95 | P     | 49.73   | 0.46 | 0.02 | A     | 22.70   | NPEPL1        | 20q13.32       |
| 208617_s_at  | 1.00 | 0.98 | P     | 1621.20 | 0.46 | 0.00 | P     | 726.87  | PTP4A2        | 1p35           |
| 226230_at    | 1.00 | 0.98 | P     | 363.07  | 0.46 | 0.00 | P     | 163.33  | KIAA1387      | 2p16.2         |
| 1554889_at   | 0.99 | 0.94 | P     | 68.17   | 0.46 | 0.01 | P     | 30.97   | TIA1          | 2p13           |
| 214965_at    | 1.00 | 0.95 | P     | 180.93  | 0.46 | 0.02 | P     | 82.20   | MGC26885      | 16q24.3        |
| 238590_x_at  | 1.00 | 0.98 | P     | 277.33  | 0.46 | 0.00 | P     | 124.77  | MGC10744      | 17p13.1        |
| 224685_at    | 0.99 | 0.94 | P     | 595.10  | 0.46 | 0.01 | P     | 268.53  | MLLT4         | 6q27           |
| 223394_at    | 1.00 | 0.99 | P     | 503.93  | 0.46 | 0.01 | P     | 227.43  | SERTAD1       | 19q13.1-q13.2  |
| 222200_s_at  | 0.99 | 0.95 | P     | 230.87  | 0.46 | 0.00 | P     | 104.43  | FLJ10276      | 1p34.3         |
| 231810_at    | 1.00 | 0.96 | P     | 604.17  | 0.46 | 0.01 | P     | 272.87  | BRI3BP        | 12q24.31       |
| 216220_s_at  | 0.99 | 0.95 | P     | 97.97   | 0.46 | 0.01 | M,A   | 44.40   | ADORA1        | 1q32.1         |
| 212872_s_at  | 0.99 | 0.94 | P     | 331.10  | 0.46 | 0.01 | P     | 148.80  | USP49         | 6p21.1         |
| 209442_x_at  | 1.00 | 0.96 | P     | 164.43  | 0.46 | 0.03 | P,M   | 75.10   | ANK3          | 10q21          |
| 225060_at    | 1.00 | 0.97 | P     | 1039.47 | 0.46 | 0.01 | P     | 470.23  | LRP11         | 6q24.3         |
| 218174_s_at  | 0.99 | 0.93 | P     | 134.40  | 0.46 | 0.01 | P     | 60.83   | C10orf57      | 10q23.1        |
| 218641_at    | 1.00 | 0.98 | P     | 281.60  | 0.46 | 0.01 | P     | 127.17  | MGC3032       | 11q13          |
| 219307_at    | 0.99 | 0.94 | P     | 332.07  | 0.46 | 0.01 | P     | 150.33  | C6orf210      | 6q21           |
| 206745_at    | 1.00 | 0.98 | P,M,A | 162.57  | 0.46 | 0.00 | A     | 73.47   | HOXC11        | 12q13.3        |
| 228239_at    | 1.00 | 0.96 | P     | 153.67  | 0.46 | 0.01 | P     | 69.73   | C21orf51      | 21q22.12       |
| 1561266_at   | 0.99 | 0.94 | P     | 63.73   | 0.46 | 0.02 | A     | 29.27   |               | 3q29           |
| 224504_s_at  | 1.00 | 0.98 | P     | 329.90  | 0.46 | 0.00 | P     | 148.90  | MGC13125      | 11q23.3        |
| 208818_s_at  | 1.00 | 0.97 | P     | 2636.37 | 0.46 | 0.00 | P     | 1194.93 | COMT          | 22q11.21       |
| 211724_x_at  | 1.00 | 0.98 | P     | 409.70  | 0.46 | 0.00 | P     | 185.40  | FLJ20323      | 7p22-p21       |
| 1564630_at   | 1.00 | 0.96 | P     | 88.03   | 0.46 | 0.01 | M,A   | 40.13   | EDN1          | 6p24.1         |
| 211596_s_at  | 0.99 | 0.95 | P,A   | 434.93  | 0.46 | 0.01 | P,M   | 197.33  | LRIG1         | 3p14           |
| 202051_s_at  | 0.99 | 0.94 | P     | 422.43  | 0.46 | 0.00 | P     | 191.43  | ZNF262        | 1p32-p34       |
| 223798_at    | 0.99 | 0.92 | P     | 79.97   | 0.46 | 0.00 | A     | 36.40   | SLC41A2       | 12q24.11       |
| 212541_at    | 1.00 | 0.97 | P     | 607.23  | 0.46 | 0.01 | P     | 275.27  | PP591         | 1q22           |
| 203763_at    | 1.00 | 0.96 | P     | 171.93  | 0.46 | 0.02 | P     | 78.00   | D2LIC         | 2p25.1-p24.1   |
| 211975_at    | 0.99 | 0.94 | P     | 879.70  | 0.46 | 0.01 | P     | 398.53  | ZNF289        | 11p11.2-p11.12 |
| 235866_at    | 0.99 | 0.94 | P     | 52.73   | 0.46 | 0.01 | P     | 24.23   | C9orf85       | 9q21.2         |
| 225209_s_at  | 1.00 | 0.97 | P     | 1044.37 | 0.46 | 0.01 | P     | 473.40  | UBE2J2        | 1p36.33        |
| 212551_at    | 0.99 | 0.94 | P     | 741.70  | 0.46 | 0.01 | P     | 337.30  | CAP2          | 6p22.3         |
| 222424_s_at  | 1.00 | 0.97 | P     | 762.23  | 0.46 | 0.01 | P     | 345.67  | NUCKS         | 1q32.1         |
| 223157_at    | 1.00 | 0.99 | P     | 99.143  | 0.46 | 0.00 | A     | 449.93  | C4orf14       | 4q12           |
| 226139_at    | 1.00 | 0.96 | P     | 99.33   | 0.46 | 0.00 | A     | 45.33   | DKFZp761B107  | 4p15.31        |
| 201350_at    | 1.00 | 0.99 | P     | 659.10  | 0.46 | 0.00 | P     | 299.23  | FLOT2         | 17q11-q12      |
| 235812_at    | 1.00 | 0.98 | P     | 674.83  | 0.46 | 0.00 | P     | 306.50  | FLJ38101      | 16q12.1        |
| 238523_at    | 1.00 | 0.95 | P     | 207.63  | 0.46 | 0.03 | P,M   | 95.27   | C16orf44      | 16q24.1        |
| 225310_at    | 1.00 | 0.97 | P     | 2737.17 | 0.46 | 0.00 | P     | 1244.30 | KAT3          | 1p22.2         |
| 226976_at    | 1.00 | 0.97 | P     | 551.30  | 0.46 | 0.01 | P     | 250.97  | KPNA6         | 1p35.1-p34.3   |
| 223272_s_at  | 0.99 | 0.93 | P     | 524.77  | 0.46 | 0.03 | A     | 240.13  | MGC13186      | 1q42.2         |
| 218274_s_at  | 1.00 | 0.96 | P     | 104.50  | 0.46 | 0.03 | A     | 47.80   | FLJ10415      | 2q36.1         |
| 237395_at    | 1.00 | 0.96 | P     | 38.53   | 0.46 | 0.02 | M,A   | 17.90   | CYP4Z1        | 1p33           |
| 1562416_at   | 0.99 | 0.94 | P     | 108.10  | 0.46 | 0.01 | P,A   | 49.37   |               |                |
| 229689_s_at  | 1.00 | 0.96 | P     | 149.27  | 0.46 | 0.01 | P     | 67.80   | DLG5          | 10q23          |
| 224653_at    | 1.00 | 0.97 | P     | 527.60  | 0.46 | 0.01 | P     | 241.23  | EIF4EBP2      | 10q21-q22      |
| 239539_at    | 1.00 | 0.96 | P     | 52.73   | 0.46 | 0.01 | P     | 24.13   | NEK3          | 13q14.13       |
| 225748_at    | 0.98 | 0.90 | P     | 642.13  | 0.46 | 0.02 | P     | 292.83  | C6orf93       | 6q24.1         |
| 226386_at    | 1.00 | 0.99 | P     | 2189.50 | 0.46 | 0.01 | P     | 996.43  | C7orf30       | 7p15.3         |
| 224436_s_at  | 0.99 | 0.94 | P     | 752.27  | 0.46 | 0.01 | P     | 343.40  | NIPSNAP3A     | 9q31.3         |
| 203656_at    | 0.99 | 0.93 | P     | 605.40  | 0.46 | 0.00 | P     | 274.23  | KIAA0274      | 6q21           |
| 228852_at    | 1.00 | 0.97 | P     | 328.17  | 0.46 | 0.01 | P     | 149.30  | ENSA          | 1q21.3         |
| 226566_at    | 1.00 | 0.97 | P     | 371.33  | 0.46 | 0.00 | P     | 168.77  | TRIM11        | 1q42.13        |
| 225409_at    | 1.00 | 0.97 | P     | 243.00  | 0.46 | 0.00 | P     | 110.97  | MGAT4A        | 2q12           |
| 201973_s_at  | 1.00 | 1.00 | P     | 2817.00 | 0.46 | 0.01 | P     | 1284.83 | C7orf28B      | 7p22.2         |
| 213932_x_at  | 1.00 | 0.98 | P     | 4347.50 | 0.46 | 0.00 | P     | 1982.53 | HLA-A         | 6p21.3         |
| 209505_at    | 1.00 | 0.98 | P     | 183.80  | 0.46 | 0.01 | P     | 84.23   | NR2F1         | 5q14           |
| 202531_at    | 1.00 | 0.96 | P     | 235.53  | 0.46 | 0.00 | P,M   | 107.90  | IRF1          | 5q31.1         |
| 39891_at     | 0.99 | 0.93 | P     | 199.47  | 0.46 | 0.01 | P     | 91.27   | DKFZp547K1113 | 15q26.1        |
| 201687_s_at  | 1.00 | 0.96 | P     | 1799.97 | 0.46 | 0.01 | P     | 824.37  | API5          | 11p12-q12      |
| 203016_s_at  | 0.99 | 0.95 | P     | 491.67  | 0.46 | 0.01 | P     | 226.13  | SSX2IP        | 1p22.3         |
| 201125_s_at  | 1.00 | 0.95 | P     | 1826.57 | 0.46 | 0.01 | P     | 834.07  | ITGB5         | 3q21.2         |
| 212753_at    | 1.00 | 0.96 | P     | 307.07  | 0.46 | 0.00 | P     | 140.57  | RNF3          | 4p16.3         |
| 225230_at    | 0.99 | 0.93 | P     | 620.37  | 0.46 | 0.00 | P     | 284.90  | MGC54289      | 1p13.2         |
| 202601_s_at  | 0.99 | 0.95 | P,A   | 182.03  | 0.46 | 0.00 | P     | 83.50   | HTATSF1       | xq26.1-q27.2   |
| 222193_at    | 1.00 | 0.96 | P     | 147.43  | 0.46 | 0.00 | P,M,A | 67.27   | FLJ21820      | 2p24.2         |
| 202197_at    | 1.00 | 0.99 | P     | 325.90  | 0.46 | 0.00 | P     | 149.13  | MTMR3         | 22q12.2        |
| 1556935_at   | 1.00 | 0.98 | P     | 188.23  | 0.47 | 0.01 | P     | 86.67   |               |                |
| 212866_at    | 1.00 | 0.97 | P     | 465.07  | 0.47 | 0.00 | P,M   | 213.30  | LOC203069     | 8p21.2         |
| 229285_at    | 1.00 | 0.97 | P     | 62.83   | 0.47 | 0.00 | M,A   | 28.70   | RNASL         | 1q25           |
| 209445_x_at  | 1.00 | 0.99 | P     | 765.23  | 0.47 | 0.00 | P     | 350.47  | FLJ10803      | 7p13           |
| 230449_x_at  | 1.00 | 0.95 | P     | 175.03  | 0.47 | 0.03 | P     | 81.30   |               |                |
| 225877_at    | 0.98 | 0.91 | P     | 218.93  | 0.47 | 0.00 | P     | 101.27  | TYSDN1        | 10q22.2        |
| 1555978_s_at | 0.99 | 0.93 | P     | 132.53  | 0.47 | 0.00 | P     | 61.03   | MRCL3         | 18p11.31       |
| 227489_at    | 0.98 | 0.91 | P     | 162.40  | 0.47 | 0.01 | P     | 75.53   | SMURF2        | 17q22-q23      |
| 229268_at    | 1.00 | 0.96 | P     | 383.10  | 0.47 | 0.01 | P     | 176.00  | RABEP1        | 17p13.3        |
| 201041_s_at  | 0.99 | 0.93 | P     | 536.27  | 0.47 | 0.00 | P     | 247.20  | DUSP1         | 5q34           |
| 204283_at    | 1.00 | 0.95 | P     | 586.80  | 0.47 | 0.00 | P     | 268.80  | FARS1         | 6p25.1         |
| 227112_at    | 1.00 | 0.97 | P     | 312.77  | 0.47 | 0.01 | P     | 144.63  | KIAA0779      | 3q21.3         |
| 205750_at    | 1.00 | 0.99 | P     | 275.07  | 0.47 | 0.01 | P     | 126.53  | BPHL          | 6p25           |
| 227772_at    | 1.00 | 0.95 | P     | 314.07  | 0.47 | 0.01 | P     | 144.73  | LATS1         | 6q24-q25.1     |
| 203567_s_at  | 0.99 | 0.93 | P     | 660.33  | 0.47 | 0.00 | P     | 304.20  | TRIM38        | 6p21.3         |
| 219394_at    | 1.00 | 0.99 | P     | 270.47  | 0.47 | 0.01 | P     | 124.80  | PGS1          | 17q25.3        |
| 214603_at    | 0.99 | 0.95 | P     | 2760.83 | 0.47 | 0.00 | P     | 1272.57 | MAGEA3        | xq28           |
| 220643_s_at  | 1.00 | 0.97 | P     | 537.30  | 0.47 | 0.02 | P     | 249.40  | FAIM          | 3q22.3         |
| 218637_at    | 1.00 | 0.96 | P     | 137.57  | 0.47 | 0.01 | P     | 63.70   | IMPACT        | 18q11.2-q12.1  |
| 201455_s_at  | 1.00 | 0.96 | P     | 339.10  | 0.47 | 0.01 | P     | 156.73  | NPEPPS        | 17q21          |
| 1556942_at   | 1.00 | 0.97 | P,M,A | 29.70   | 0.47 | 0.00 | P,A   | 13.67   | KIAA1126      | 8q24.3         |
| 219332_at    | 1.00 | 0.97 | P     | 270.73  | 0.47 | 0.01 | M,A   | 124.73  | FLJ23471      | 7p22.3         |
| 1556054_at   | 0.99 | 0.92 | P,A   | 36.97   | 0.47 | 0.01 | P,A   | 17.17   | TBC1D8        | 2q12.1         |
| 223742_at    | 1.00 | 0.96 | P     | 280.53  | 0.47 | 0.01 | P     | 129.47  | MRPL4         | 19p13.2        |
| 222401_s_at  | 0.99 | 0.95 | P     | 1619.60 | 0.47 | 0.00 | P     | 747.47  | SMP1          | 1p36.11        |

|              |      |      |       |         |      |      |       |         |               |                |
|--------------|------|------|-------|---------|------|------|-------|---------|---------------|----------------|
| 206109_at    | 1.00 | 0.97 | P     | 111.50  | 0.47 | 0.01 | A     | 52.00   | FUT1          | 19q13.3        |
| 231092_s_at  | 1.00 | 0.99 | P,A   | 45.10   | 0.47 | 0.00 | A     | 20.77   | ZNRF1         | 16q22.3        |
| 226896_at    | 1.00 | 0.96 | P     | 1313.87 | 0.47 | 0.01 | P     | 607.93  | CHCHD1        | 10q22.3        |
| 235534_at    | 1.00 | 0.96 | P     | 96.73   | 0.47 | 0.00 | A     | 44.60   |               |                |
| 209252_at    | 1.00 | 0.96 | P     | 417.87  | 0.47 | 0.01 | P     | 193.70  | HARSL         | 5q31.3         |
| 239504_at    | 0.99 | 0.92 | P     | 69.53   | 0.47 | 0.01 | A     | 32.30   |               |                |
| 207713_s_at  | 0.99 | 0.93 | P     | 214.43  | 0.47 | 0.02 | P     | 99.50   | C2orf18       | 20p13          |
| 211809_x_at  | 0.99 | 0.92 | P,A   | 64.87   | 0.47 | 0.02 | A     | 30.23   | COL13A1       | 10q22          |
| 203488_at    | 0.99 | 0.93 | P     | 249.93  | 0.47 | 0.00 | M,A   | 115.70  | LPN1          | 19p13.2        |
| 211657_at    | 1.00 | 0.98 | P     | 149.93  | 0.47 | 0.02 | P     | 69.67   | CEACAM6       | 19q13.2        |
| 234978_at    | 1.00 | 0.96 | P     | 237.73  | 0.47 | 0.02 | A     | 110.70  | SLC36A4       | 11q14.3        |
| 204784_s_at  | 0.99 | 0.93 | P     | 517.43  | 0.47 | 0.01 | P     | 239.77  | MLF1          | 3q25.1         |
| 223491_at    | 0.99 | 0.93 | P     | 654.33  | 0.47 | 0.01 | P     | 304.17  | COMMD2        | 3q25.1         |
| 225604_s_at  | 0.99 | 0.95 | P     | 68.20   | 0.47 | 0.01 | P,A   | 31.87   | C9orf19       | 9p13-p12       |
| 201325_s_at  | 0.99 | 0.93 | P     | 532.57  | 0.47 | 0.00 | P     | 247.37  | EMP1          | 12p12.3        |
| 244687_at    | 1.00 | 0.96 | P     | 152.67  | 0.47 | 0.01 | A     | 71.17   |               |                |
| 228721_at    | 1.00 | 0.97 | P     | 89.57   | 0.47 | 0.00 | P     | 41.47   | LOC339903     | 3p21.33        |
| 202100_at    | 0.99 | 0.94 | P     | 961.87  | 0.47 | 0.00 | P     | 444.27  | RALB          | 2cen-q13       |
| 244474_at    | 0.99 | 0.94 | P     | 185.80  | 0.47 | 0.00 | P,M   | 85.87   |               |                |
| 1568873_at   | 1.00 | 0.97 | P     | 134.93  | 0.47 | 0.00 | P     | 62.60   | ZNF519        | 18p11.21       |
| 223195_s_at  | 1.00 | 0.95 | P,A   | 163.57  | 0.47 | 0.00 | P,M   | 75.97   | SES2          | 1p35.2         |
| 222720_x_at  | 0.99 | 0.94 | P,A   | 31.17   | 0.47 | 0.03 | A     | 14.83   | C1orf27       | 1q25           |
| 242012_at    | 1.00 | 0.96 | P     | 100.77  | 0.47 | 0.02 | A     | 47.03   |               |                |
| 227665_at    | 0.99 | 0.93 | P     | 276.13  | 0.47 | 0.03 | P     | 130.27  | MCART1        | 9p13.3-p12     |
| 222557_at    | 1.00 | 0.96 | P     | 93.57   | 0.47 | 0.01 | A     | 43.83   | STMN3         | 20q13.3        |
| 244201_at    | 1.00 | 0.95 | P     | 113.17  | 0.47 | 0.00 | P,A   | 52.40   |               |                |
| 217802_s_at  | 1.00 | 0.98 | P     | 2352.27 | 0.47 | 0.01 | P     | 1095.17 | NUCKS         | 1q32.1         |
| 232319_at    | 0.99 | 0.95 | P     | 29.57   | 0.47 | 0.03 | P,A   | 13.90   |               |                |
| 202646_s_at  | 1.00 | 0.97 | P     | 2414.80 | 0.47 | 0.01 | P     | 1123.10 | D1S155E       | 1p22           |
| 235640_at    | 0.99 | 0.95 | P     | 115.00  | 0.47 | 0.02 | P,A   | 53.77   |               |                |
| 38398_at     | 0.99 | 0.94 | P     | 289.47  | 0.47 | 0.01 | P     | 134.37  | MADD          | 11p11.2        |
| 243315_at    | 0.99 | 0.95 | P     | 116.07  | 0.47 | 0.02 | P,M,A | 54.33   |               |                |
| 242989_at    | 0.99 | 0.95 | P     | 71.43   | 0.47 | 0.00 | P     | 33.23   |               |                |
| 227085_at    | 1.00 | 0.98 | P     | 1095.17 | 0.47 | 0.00 | P     | 510.53  | H2AFV         | 7p13           |
| 202180_s_at  | 0.99 | 0.93 | P     | 292.83  | 0.47 | 0.01 | P     | 136.07  | MVP           | 16p13.1-p11.2  |
| 201368_at    | 1.00 | 0.96 | P     | 1327.00 | 0.47 | 0.02 | P     | 622.07  | ZFP36L2       | 2p22.3-p21     |
| 204319_s_at  | 1.00 | 0.99 | P     | 508.83  | 0.47 | 0.00 | P     | 236.40  | RGS10         | 10q25          |
| 204949_at    | 1.00 | 0.97 | P     | 859.00  | 0.47 | 0.01 | P     | 399.40  | ICAM3         | 19p13.3-p13.2  |
| 203823_at    | 1.00 | 0.98 | P,A   | 223.67  | 0.47 | 0.00 | A     | 104.13  | RGS3          | 9q32           |
| 218961_s_at  | 1.00 | 0.99 | P     | 437.70  | 0.47 | 0.00 | P     | 203.57  | PNKP          | 19q13.3-q13.4  |
| 209472_at    | 1.00 | 1.00 | P     | 733.50  | 0.47 | 0.01 | P     | 341.53  | KAT3          | 1p22.2         |
| 226808_at    | 0.99 | 0.95 | P     | 44.33   | 0.47 | 0.01 | P     | 20.83   | KIAA0543      | 7q36.1         |
| 200842_s_at  | 0.99 | 0.95 | P     | 1111.20 | 0.47 | 0.02 | P     | 521.73  | EPRS          | 1q41-q42       |
| 201214_s_at  | 1.00 | 0.99 | P     | 552.37  | 0.47 | 0.00 | P     | 257.30  | PPP1R7        | 2q37.3         |
| 242514_at    | 1.00 | 0.95 | P,A   | 51.93   | 0.47 | 0.01 | A     | 24.13   |               |                |
| 228292_at    | 1.00 | 0.96 | P     | 206.00  | 0.47 | 0.01 | P     | 96.47   | GBA2          | 9p13.2         |
| 229838_at    | 0.99 | 0.94 | P,M,A | 133.47  | 0.47 | 0.00 | P,A   | 61.97   | NUCB2         | 11p15.1-p14    |
| 230099_at    | 1.00 | 0.96 | P     | 208.00  | 0.47 | 0.01 | A     | 97.37   |               |                |
| 208780_x_at  | 1.00 | 0.99 | P     | 4455.73 | 0.47 | 0.00 | P     | 2080.33 | VAPA          | 18p11.22       |
| 225953_at    | 1.00 | 0.98 | P     | 629.67  | 0.47 | 0.01 | P     | 293.73  | P15RS         | 18q12.2        |
| 209594_x_at  | 1.00 | 0.99 | P     | 224.87  | 0.47 | 0.00 | A     | 104.80  | PSG9          | 19q13.2        |
| 1555487_a_at | 0.99 | 0.94 | P     | 316.10  | 0.47 | 0.03 | A     | 149.03  | ARP3BETA      | 7q32-q36       |
| 223675_s_at  | 0.99 | 0.95 | P     | 453.40  | 0.47 | 0.02 | P     | 213.27  | VEZATIN       | 12q23.1        |
| 239381_at    | 1.00 | 0.96 | P     | 164.97  | 0.47 | 0.00 | P     | 77.27   | CLK7          | 19q13.41       |
| 235768_at    | 1.00 | 0.98 | P     | 85.80   | 0.47 | 0.01 | A     | 40.43   | SH3RF2        | 5q32           |
| 222870_s_at  | 0.99 | 0.93 | P     | 653.40  | 0.47 | 0.00 | P     | 306.43  | B3GNT1        | 2p15           |
| 202215_s_at  | 1.00 | 1.00 | P     | 899.00  | 0.47 | 0.01 | P     | 420.33  | NFYC          | 1p32           |
| 207122_x_at  | 1.00 | 0.97 | P     | 385.23  | 0.47 | 0.00 | A     | 179.73  | SULT1A1       | 16p12.1        |
| 1557252_at   | 0.99 | 0.95 | P     | 59.60   | 0.47 | 0.01 | P     | 27.80   |               |                |
| 210695_s_at  | 1.00 | 0.96 | P     | 369.90  | 0.48 | 0.02 | P     | 175.60  | WWOX          | 16q23.3-q24.1  |
| 1553167_a_at | 0.99 | 0.94 | P     | 47.77   | 0.48 | 0.01 | P     | 22.47   | SLALP         | 4p15.31        |
| 234950_s_at  | 1.00 | 0.99 | P     | 544.30  | 0.48 | 0.01 | P     | 254.90  | COP1          | 1q24.2-q24.3   |
| 216129_at    | 0.99 | 0.93 | P,A   | 28.23   | 0.48 | 0.01 | A     | 13.30   | ATP9A         | 20q13.11-q13.2 |
| 235117_at    | 1.00 | 0.99 | P     | 825.80  | 0.48 | 0.00 | P     | 388.07  |               |                |
| 207513_s_at  | 1.00 | 0.98 | P     | 274.57  | 0.48 | 0.02 | P     | 129.50  | ZNF189        | 9q22-q31       |
| 213215_at    | 0.99 | 0.95 | P     | 379.43  | 0.48 | 0.01 | P     | 177.27  |               |                |
| 202734_at    | 1.00 | 0.96 | P     | 667.60  | 0.48 | 0.00 | P     | 313.23  | TRIP10        | 19p13.3        |
| 228480_at    | 1.00 | 0.95 | P     | 124.87  | 0.48 | 0.00 | P     | 58.40   | VAPA          | 18p11.22       |
| 225480_at    | 1.00 | 0.96 | P     | 1551.53 | 0.48 | 0.00 | P     | 725.23  | FLJ45459      | 1p34.2         |
| 201063_at    | 1.00 | 0.98 | P     | 2471.80 | 0.48 | 0.01 | P     | 1157.93 | RCN1          | 11p13          |
| 200670_at    | 1.00 | 0.96 | P     | 1433.03 | 0.48 | 0.00 | P     | 673.20  | XBP1          | 22q12.1        |
| 208021_s_at  | 1.00 | 0.96 | P     | 292.87  | 0.48 | 0.02 | P     | 138.60  | RFC1          | 4p14-p13       |
| 235159_at    | 0.99 | 0.94 | P     | 154.77  | 0.48 | 0.02 | P     | 73.03   |               |                |
| 239538_at    | 0.99 | 0.92 | P     | 91.43   | 0.48 | 0.01 | P,A   | 43.07   | DKFZP434B1727 | 2q21.3         |
| 207358_x_at  | 1.00 | 0.96 | P     | 1128.90 | 0.48 | 0.01 | P     | 532.87  | MACF1         | 1p32-p31       |
| 209608_s_at  | 1.00 | 0.97 | P     | 1467.17 | 0.48 | 0.00 | P     | 690.13  | ACAT2         | 6q25.3-q26     |
| 219296_at    | 1.00 | 0.99 | P     | 334.03  | 0.48 | 0.01 | P     | 157.40  | ZDHHC13       | 11p15.1        |
| 212748_at    | 1.00 | 0.96 | P     | 290.80  | 0.48 | 0.00 | P     | 137.13  | MKL1          | 22q13          |
| 225745_at    | 1.00 | 0.98 | P     | 316.73  | 0.48 | 0.01 | P     | 149.33  | LRP6          | 12p11-p13      |
| 218578_at    | 1.00 | 0.98 | P     | 563.27  | 0.48 | 0.01 | P     | 265.67  | HRPT2         | 1q25           |
| 201724_s_at  | 1.00 | 0.97 | P     | 341.20  | 0.48 | 0.00 | P     | 160.87  | GALNT1        | 18q12.1        |
| 218018_at    | 0.99 | 0.94 | P     | 2057.17 | 0.48 | 0.02 | P     | 973.67  | PDXX          | 21q22.3        |
| 209204_at    | 0.99 | 0.95 | P     | 83.53   | 0.48 | 0.01 | P     | 39.73   | LMO4          | 1p22.3         |
| 201695_s_at  | 1.00 | 0.95 | P     | 807.70  | 0.48 | 0.00 | P     | 382.27  | NP            | 14q13.1        |
| 203322_at    | 0.99 | 0.92 | P     | 228.20  | 0.48 | 0.02 | P     | 108.43  | KIAA0863      | 18q23          |
| 209146_at    | 1.00 | 0.97 | P     | 1953.00 | 0.48 | 0.00 | P     | 921.60  | SCAMOL        | 4q32-q34       |
| 241379_at    | 1.00 | 0.98 | P     | 20.77   | 0.48 | 0.01 | P,A   | 9.83    | C2orf13       | 2p13.3         |
| 243490_at    | 0.99 | 0.94 | P     | 71.93   | 0.48 | 0.02 | P     | 34.17   |               |                |
| 219313_at    | 1.00 | 0.98 | P     | 88.90   | 0.48 | 0.02 | M,A   | 42.20   | DKFZp434C0328 | 3q13.31        |
| 213373_s_at  | 0.99 | 0.94 | P     | 685.00  | 0.48 | 0.01 | P     | 324.57  | CASP8         | 2q33-q34       |
| 228697_at    | 1.00 | 0.99 | P     | 761.60  | 0.48 | 0.00 | P     | 359.70  | HINT3         | 6q22.33        |
| 221588_x_at  | 1.00 | 0.97 | P     | 235.93  | 0.48 | 0.00 | M,A   | 111.53  | ALDH6A1       | 14q24.3        |
| 204120_s_at  | 1.00 | 0.99 | P     | 899.33  | 0.48 | 0.01 | P     | 425.70  | ADK           | 10q22          |
| 223637_s_at  | 0.99 | 0.95 | P     | 227.27  | 0.48 | 0.00 | P     | 107.27  | DKFZP566M1046 | 11p15.4        |
| 51158_at     | 1.00 | 0.97 | P     | 391.73  | 0.48 | 0.02 | P     | 186.17  | LOC400451     | 15q26.1        |
| 220073_s_at  | 1.00 | 0.96 | P     | 121.47  | 0.48 | 0.02 | P,A   | 57.83   | FLJ10665      | 12p13.32       |

|              |      |      |       |         |      |      |       |         |               |                 |
|--------------|------|------|-------|---------|------|------|-------|---------|---------------|-----------------|
| 214773_x_at  | 1.00 | 0.99 | P     | 642.03  | 0.48 | 0.00 | P     | 304.53  | MGC3794       | 1q23.2          |
| 200076_s_at  | 1.00 | 0.98 | P     | 1045.03 | 0.48 | 0.01 | P     | 497.37  | MGC2749       | 19p13.11        |
| 235492_at    | 1.00 | 0.95 | P,M   | 128.13  | 0.48 | 0.00 | A     | 61.03   | IBRDC1        | 6q22.33         |
| 226050_at    | 1.00 | 0.96 | P     | 1000.67 | 0.48 | 0.00 | P     | 477.53  | C13orf11      | 13q34           |
| 220741_s_at  | 1.00 | 0.95 | P     | 794.13  | 0.48 | 0.01 | P     | 378.07  | PPA2          | 4q25            |
| 211385_x_at  | 1.00 | 0.99 | P     | 304.80  | 0.48 | 0.01 | A     | 145.27  | SULT1A1       | 16p12.1         |
| 208384_s_at  | 1.00 | 0.96 | P     | 201.83  | 0.48 | 0.01 | P,A   | 96.07   | MID2          | xq22            |
| 202378_s_at  | 0.99 | 0.94 | P     | 999.57  | 0.48 | 0.01 | P     | 475.17  | OBRGRP        | 1p31.3          |
| 202980_s_at  | 0.99 | 0.92 | P     | 147.77  | 0.48 | 0.00 | P     | 70.57   | SIAH1         | 16q12           |
| 212760_at    | 1.00 | 0.96 | P     | 511.60  | 0.48 | 0.00 | P     | 243.77  | C6orf133      | 6p21.1          |
| 214585_s_at  | 0.99 | 0.94 | P     | 924.07  | 0.48 | 0.00 | P     | 439.53  | VPS52         | 6p21.3          |
| 206949_s_at  | 1.00 | 0.98 | P     | 1156.23 | 0.48 | 0.00 | P     | 551.87  | RUSC1         | 1q21-q22        |
| 212286_at    | 0.99 | 0.93 | P     | 241.60  | 0.48 | 0.01 | P     | 115.43  | ANKRD12       | 18p11.22        |
| 90265_at     | 0.99 | 0.94 | P     | 224.57  | 0.48 | 0.01 | A     | 107.23  | CENTA1        | 7p22.3          |
| 225912_at    | 0.99 | 0.94 | P     | 151.90  | 0.48 | 0.00 | P,M,A | 72.07   | TP53INP1      | 8q22            |
| 224509_s_at  | 0.99 | 0.93 | P     | 304.83  | 0.48 | 0.02 | P     | 145.90  | RTN4IP1       | 6q21            |
| 203610_s_at  | 1.00 | 0.96 | P     | 426.73  | 0.48 | 0.00 | P     | 204.20  | TRIM38        | 6p21.3          |
| 210570_x_at  | 0.99 | 0.94 | P,A   | 362.33  | 0.48 | 0.01 | A     | 174.70  | MAPK9         | 5q35            |
| 208092_s_at  | 0.99 | 0.94 | P     | 104.60  | 0.48 | 0.02 | A     | 50.07   | DKFZP566A1524 | 2p24.3          |
| 243947_s_at  | 0.99 | 0.93 | P     | 99.13   | 0.48 | 0.02 | P     | 47.80   |               |                 |
| 207416_s_at  | 0.99 | 0.92 | P     | 113.40  | 0.48 | 0.02 | P     | 54.67   | NFATC3        | 16q22.2         |
| 203606_at    | 0.99 | 0.93 | P     | 3763.33 | 0.48 | 0.02 | P     | 1799.97 | NDUFS6        | 5p15.33         |
| 208690_s_at  | 1.00 | 0.99 | P     | 1567.10 | 0.48 | 0.01 | P     | 749.63  | PDLM1         | 10q22-q26.3     |
| 1553274_a_at | 1.00 | 0.95 | P     | 239.03  | 0.49 | 0.03 | P     | 114.97  | C6orf151      | 6p24.3          |
| 227785_at    | 1.00 | 0.97 | P,A   | 95.43   | 0.49 | 0.01 | A     | 45.63   | SDCCAG8       | 1q43-q44        |
| 204064_at    | 1.00 | 0.97 | P     | 796.53  | 0.49 | 0.00 | P     | 379.73  | THOC1         | 18p11.32        |
| 217125_at    | 0.99 | 0.93 | P,M,A | 86.47   | 0.49 | 0.01 | A     | 41.77   | UBB           | 17p12-p11.2     |
| 217798_at    | 1.00 | 0.98 | P     | 506.63  | 0.49 | 0.02 | P     | 243.13  | CNOT2         | 12q14.3-q15     |
| 1557965_at   | 1.00 | 0.98 | P     | 315.27  | 0.49 | 0.01 | P     | 151.70  | MGC61716      | 2q37.3          |
| 201315_x_at  | 0.99 | 0.93 | P     | 709.97  | 0.49 | 0.02 | P     | 341.13  | IFITM3        | 11p15.5         |
| 223305_at    | 1.00 | 0.96 | P     | 222.67  | 0.49 | 0.00 | M,A   | 107.10  | MGC:13379     | 11q13.1         |
| 40359_at     | 1.00 | 0.99 | P     | 621.17  | 0.49 | 0.00 | P     | 297.17  | C11orf13      | 11p15.5         |
| 212983_at    | 1.00 | 0.97 | P     | 405.17  | 0.49 | 0.01 | P     | 194.23  | HRAS          | 11p15.5         |
| 204028_s_at  | 1.00 | 0.96 | P     | 624.33  | 0.49 | 0.00 | P     | 298.27  | RABGAP1       | 9q34.11         |
| 227701_at    | 0.99 | 0.94 | P     | 314.80  | 0.49 | 0.02 | P     | 151.97  | C10orf118     | 10q26.11        |
| 203450_at    | 1.00 | 0.96 | P,A   | 341.80  | 0.49 | 0.01 | A     | 164.67  | C22orf2       | 22q12           |
| 235145_at    | 1.00 | 0.95 | P,A   | 171.43  | 0.49 | 0.00 | A     | 82.37   | ZFP67         | 1q22            |
| 1553703_at   | 1.00 | 0.96 | P     | 634.13  | 0.49 | 0.02 | P     | 304.97  | FLJ90396      | 19p13.2         |
| 1560049_at   | 0.99 | 0.93 | P     | 191.80  | 0.49 | 0.03 | P     | 93.07   |               |                 |
| 218668_s_at  | 1.00 | 0.98 | P     | 1194.80 | 0.49 | 0.01 | P     | 572.40  | RAP2C         | xq25            |
| 224782_at    | 1.00 | 0.97 | P     | 1193.20 | 0.49 | 0.00 | P     | 571.73  | FLJ31121      | 5q31.3          |
| 201697_s_at  | 1.00 | 0.97 | P     | 2595.70 | 0.49 | 0.00 | P     | 1245.67 | DNMT1         | 19p13.2         |
| 238889_at    | 1.00 | 0.95 | P,M,A | 42.67   | 0.49 | 0.03 | A     | 20.73   | FLJ21839      | 2p23.3          |
| 238327_at    | 1.00 | 0.95 | P     | 65.87   | 0.49 | 0.01 | A     | 31.73   | ECGF1         | 22q13.33        |
| 53968_at     | 0.99 | 0.92 | P     | 691.60  | 0.49 | 0.01 | P     | 331.27  | KIAA1698      | 11q12.3         |
| 222732_at    | 1.00 | 0.99 | P     | 413.53  | 0.49 | 0.00 | P     | 199.00  | TRIM39        | 6p21.3          |
| 213590_at    | 1.00 | 0.99 | P     | 187.00  | 0.49 | 0.00 | P     | 90.07   | SLC16A5       | 17q25.2         |
| 214934_at    | 1.00 | 0.97 | P     | 97.20   | 0.49 | 0.00 | P,A   | 46.57   | ATP9B         | 18q23           |
| 201407_s_at  | 1.00 | 1.00 | P     | 1236.27 | 0.49 | 0.02 | P     | 596.60  | PPP1CB        | 2p23            |
| 227996_at    | 1.00 | 0.96 | P     | 103.33  | 0.49 | 0.00 | A     | 49.80   | FARP1         | 13q32.2-q32.3   |
| 212991_at    | 0.99 | 0.94 | P     | 87.47   | 0.49 | 0.02 | A     | 42.33   | FBX09         | 6p12.3-p11.2    |
| 223849_s_at  | 1.00 | 0.97 | P     | 188.43  | 0.49 | 0.00 | P     | 90.43   | MOV10         | 1p13.1          |
| 229854_at    | 0.99 | 0.94 | P     | 82.77   | 0.49 | 0.00 | A     | 39.73   | OBSCN         | 1q42            |
| 225203_at    | 1.00 | 0.98 | P     | 216.17  | 0.49 | 0.02 | P,A   | 104.87  | PPP1R16A      | 8q24.3          |
| 212289_at    | 1.00 | 0.97 | P     | 228.73  | 0.49 | 0.01 | P     | 110.20  | ANKRD12       | 18p11.22        |
| 1553325_at   | 0.99 | 0.94 | P,M,A | 58.33   | 0.49 | 0.03 | M,A   | 28.77   | FLJ25680      | 5q15            |
| 213311_s_at  | 0.99 | 0.94 | P     | 622.03  | 0.49 | 0.03 | P     | 301.40  | KIAA1049      | 16q24.3         |
| 215071_s_at  | 1.00 | 0.97 | P     | 334.73  | 0.49 | 0.02 | P     | 161.77  | HIST1H2AC     | 6p21.3          |
| 202671_s_at  | 1.00 | 0.98 | P     | 1828.33 | 0.49 | 0.00 | P     | 880.90  | PDXK          | 21q22.3         |
| 202754_at    | 1.00 | 0.96 | P     | 1118.53 | 0.49 | 0.01 | P     | 539.27  | R3HDM         | 2q21.3          |
| 226143_at    | 1.00 | 0.98 | P     | 1158.17 | 0.49 | 0.01 | P     | 559.53  | RAI1          | 17p11.2         |
| 226640_at    | 1.00 | 0.95 | P     | 197.30  | 0.49 | 0.01 | P     | 95.20   | LOC221955     | 7p22.2          |
| 207196_s_at  | 1.00 | 0.99 | P     | 540.33  | 0.49 | 0.01 | P     | 261.17  | TNIP1         | 5q32-q33.1      |
| 214352_s_at  | 1.00 | 0.96 | P     | 1213.30 | 0.49 | 0.00 | P     | 584.37  | KRAS2         | 12p12.1         |
| 222689_at    | 0.98 | 0.91 | P     | 401.07  | 0.49 | 0.01 | P     | 195.13  | PHCA          | 11q13.3         |
| 230375_at    | 1.00 | 0.97 | P     | 106.20  | 0.49 | 0.02 | P     | 51.50   | C6orf111      | 6q16.3          |
| 62212_at     | 1.00 | 0.98 | P     | 279.43  | 0.49 | 0.00 | P     | 134.93  | MGC955        | 1p34.1          |
| 203465_at    | 0.99 | 0.92 | P     | 816.43  | 0.49 | 0.01 | P     | 396.17  | MRPL19        | 2q11.1-q11.2    |
| 239196_at    | 1.00 | 0.96 | P     | 189.70  | 0.49 | 0.02 | A     | 92.27   | ANKRD22       | 10q23.31-q23.32 |
| 200789_at    | 1.00 | 0.99 | P     | 884.03  | 0.49 | 0.00 | P     | 427.40  | ECH1          | 19q13.1         |
| 223596_at    | 0.99 | 0.95 | P,M   | 54.97   | 0.49 | 0.01 | P,A   | 26.53   | SLC12A6       | 15q13-q15       |
| 243876_at    | 0.99 | 0.95 | P     | 21.87   | 0.49 | 0.03 | P,A   | 10.73   |               |                 |
| 202068_s_at  | 1.00 | 0.97 | P     | 1144.17 | 0.49 | 0.02 | P     | 554.83  | LDLR          | 19p13.3         |
| 227876_at    | 0.99 | 0.93 | P     | 147.83  | 0.49 | 0.02 | P     | 72.03   | KIAA1688      | 8q24.3          |
| 201475_x_at  | 1.00 | 0.97 | P     | 1581.67 | 0.49 | 0.00 | P     | 765.70  | MARS          | 12q13.2         |
| 214220_s_at  | 1.00 | 0.97 | P     | 190.37  | 0.49 | 0.01 | P     | 92.07   | ALMS1         | 2p13            |
| 201899_s_at  | 1.00 | 0.98 | P     | 2716.43 | 0.49 | 0.00 | P     | 1314.23 | UBE2A         | xq24-q25        |
| 232457_at    | 0.98 | 0.91 | P     | 36.10   | 0.49 | 0.01 | P,A   | 17.50   | KIAA1102      | 4p14            |
| 212780_at    | 1.00 | 0.98 | P     | 244.23  | 0.49 | 0.01 | P     | 118.57  | SOS1          | 2p22-p21        |
| 40446_at     | 0.99 | 0.92 | P     | 1152.57 | 0.49 | 0.03 | P     | 560.13  | PHF1          | 6p21.3          |
| 202893_at    | 1.00 | 0.96 | P     | 531.30  | 0.49 | 0.01 | P     | 259.10  | UNC13B        | 9p12-p11        |
| 219289_at    | 1.00 | 0.99 | P     | 455.00  | 0.49 | 0.00 | P     | 220.47  | FLJ20718      | 16q12.1         |
| 204480_s_at  | 1.00 | 0.96 | P     | 729.83  | 0.49 | 0.00 | P     | 354.33  | C9orf16       | 9q34.1          |
| 209849_s_at  | 0.99 | 0.94 | P     | 295.10  | 0.49 | 0.02 | P     | 146.03  | RAD51C        | 17q22-q23       |
| 201460_at    | 1.00 | 0.99 | P     | 666.90  | 0.49 | 0.00 | P     | 323.03  | MAPKAPK2      | 1q32            |
| 218846_at    | 1.00 | 0.98 | P     | 411.00  | 0.49 | 0.01 | P     | 199.70  | CRSP3         | 6q22.33-q24.1   |
| 1556879_at   | 0.99 | 0.93 | P     | 69.00   | 0.49 | 0.02 | P     | 34.03   |               |                 |
| 201543_s_at  | 1.00 | 0.97 | P     | 1386.27 | 0.49 | 0.00 | P     | 672.57  | SARA1         | 10q22.2         |
| 201833_at    | 1.00 | 0.99 | P     | 2586.80 | 0.49 | 0.00 | P     | 1254.93 | HDAC2         | 6q21            |
| 229035_s_at  | 1.00 | 0.96 | P     | 221.90  | 0.49 | 0.00 | P     | 107.90  | DKFzP434G0522 | 16q24.3         |
| 208816_x_at  | 0.99 | 0.93 | P     | 1495.67 | 0.49 | 0.01 | P     | 723.47  | ANXA2P1       | 4q21-q31        |
| 244398_x_at  | 0.99 | 0.94 | P     | 89.10   | 0.49 | 0.02 | P     | 43.63   | MGC27466      | 1p34.2          |
| 227369_at    | 1.00 | 0.95 | P     | 454.13  | 0.49 | 0.02 | P     | 222.50  | PAI-RBP1      | 1p31-p22        |
| 226109_at    | 1.00 | 1.00 | P     | 1054.97 | 0.49 | 0.01 | P     | 513.50  | C21orf91      | 21q21.1         |
| 203017_s_at  | 0.99 | 0.95 | P     | 262.77  | 0.49 | 0.02 | P     | 129.03  | SSX2IP        | 1p22.3          |
| 233595_at    | 1.00 | 0.97 | P     | 267.80  | 0.49 | 0.02 | P     | 130.83  |               |                 |

|              |      |      |     |         |      |      |       |         |               |               |
|--------------|------|------|-----|---------|------|------|-------|---------|---------------|---------------|
| 226070_at    | 1.00 | 0.97 | P,A | 226.87  | 0.49 | 0.03 | M,A   | 111.40  | LOC286257     | 9q34.3        |
| 226177_at    | 1.00 | 0.97 | P   | 989.27  | 0.49 | 0.00 | P     | 482.00  | GLTP          | 12q24.12      |
| 227568_at    | 0.98 | 0.91 | P   | 159.87  | 0.49 | 0.02 | P     | 78.70   | HECTD2        | 10q23.32      |
| 229862_x_at  | 1.00 | 0.97 | P   | 195.43  | 0.49 | 0.00 | P     | 94.93   | ZNF499        | 19q13.43      |
| 218570_at    | 0.99 | 0.94 | P   | 388.10  | 0.49 | 0.02 | P     | 188.83  | KBTBD4        | 11p11.2       |
| 222266_at    | 1.00 | 0.97 | P   | 397.03  | 0.49 | 0.02 | P     | 194.43  | C19orf2       | 19q12         |
| 213684_s_at  | 0.99 | 0.94 | P   | 89.17   | 0.49 | 0.00 | P     | 43.40   | LIM           | 4q22          |
| 210582_s_at  | 0.99 | 0.94 | P   | 369.80  | 0.49 | 0.00 | P     | 181.13  | LIMK2         | 22q12.2       |
| 218837_s_at  | 1.00 | 0.97 | P   | 290.93  | 0.49 | 0.00 | M,A   | 141.53  | LOC51619      | 7p13          |
| 242592_at    | 1.00 | 0.99 | P   | 68.93   | 0.50 | 0.00 | P     | 33.73   | DKFZp762F0713 | 14q22.1       |
| 202814_s_at  | 1.00 | 0.97 | P   | 639.53  | 0.50 | 0.01 | P     | 311.17  | HIS1          | 17q21.31      |
| 228328_at    | 0.99 | 0.93 | P   | 130.70  | 0.50 | 0.02 | P     | 64.13   |               |               |
| 228785_at    | 1.00 | 0.96 | P   | 748.90  | 0.50 | 0.01 | P     | 364.50  | ZNF281        | 1q32.1        |
| 212103_at    | 1.00 | 0.99 | P,M | 298.13  | 0.50 | 0.01 | A     | 145.40  | KPNA6         | 1p35.1-p34.3  |
| 239134_at    | 0.99 | 0.93 | P   | 193.00  | 0.50 | 0.00 | P     | 93.73   |               |               |
| 225053_at    | 1.00 | 0.99 | P   | 1763.73 | 0.50 | 0.00 | P     | 860.07  | CNOT7         | 8p22-p21.3    |
| 226538_at    | 1.00 | 0.97 | P   | 717.27  | 0.50 | 0.01 | P     | 349.83  | MAN2A1        | 5q21-q22      |
| 229337_at    | 0.99 | 0.95 | P   | 135.20  | 0.50 | 0.00 | A     | 65.83   | USP2          | 11q23.3       |
| 213349_at    | 1.00 | 0.96 | P   | 202.50  | 0.50 | 0.00 | P     | 99.10   | KIAA0779      | 3q21.3        |
| 220372_at    | 1.00 | 0.96 | P,M | 38.67   | 0.50 | 0.01 | P,M   | 18.93   | C21orf55      | 21q22.11      |
| 209911_x_at  | 0.99 | 0.93 | P   | 361.17  | 0.50 | 0.00 | P     | 177.47  | HIST1H2BD     | 6p21.3        |
| 41329_at     | 0.99 | 0.93 | P   | 158.77  | 0.50 | 0.02 | P     | 77.67   | PACE-1        | 1q23.3        |
| 226525_at    | 0.99 | 0.92 | P   | 369.80  | 0.50 | 0.01 | P     | 180.47  |               |               |
| 1555976_s_at | 0.99 | 0.94 | P   | 163.33  | 0.50 | 0.00 | A     | 80.17   | MRCL3         | 18p11.31      |
| 1555852_at   | 0.99 | 0.92 | P   | 56.97   | 0.50 | 0.02 | M,A   | 27.87   | PSMB8         | 6p21.3        |
| 234394_at    | 1.00 | 0.96 | P   | 54.67   | 0.50 | 0.02 | P     | 27.10   |               |               |
| 222603_at    | 1.00 | 0.97 | P   | 941.60  | 0.50 | 0.02 | P     | 463.90  | KIAA1815      | 9p24          |
| 224390_s_at  | 0.99 | 0.94 | P,A | 79.13   | 0.50 | 0.02 | A     | 39.23   | RGS8          | 1q25          |
| 225706_at    | 0.99 | 0.95 | P   | 218.53  | 0.50 | 0.03 | P     | 108.10  | GLCCI1        | 7p22.1        |
| 235223_at    | 1.00 | 1.00 | P   | 327.77  | 0.50 | 0.02 | P     | 161.20  | C6orf153      | 6p21.1        |
| 244622_at    | 1.00 | 0.97 | P   | 59.53   | 0.50 | 0.02 | M,A   | 29.53   | C21orf107     | 21q22.2       |
| 221880_s_at  | 1.00 | 0.97 | P   | 210.80  | 0.50 | 0.01 | P     | 103.23  | LOC400451     | 15q26.1       |
| 213658_at    | 1.00 | 0.97 | P   | 105.40  | 0.50 | 0.02 | P     | 52.00   | DKFZp547K1113 | 15q26.1       |
| 212552_at    | 1.00 | 0.98 | P   | 1207.87 | 0.50 | 0.00 | P     | 593.80  | HPCAL1        | 2p25.1        |
| 225853_at    | 1.00 | 0.98 | P   | 1013.10 | 0.50 | 0.00 | P     | 497.17  | GNPNAT1       | 14q22.1       |
| 201502_s_at  | 0.99 | 0.94 | P   | 499.20  | 0.50 | 0.01 | P     | 245.77  | NFKBIA        | 14q13         |
| 235610_at    | 1.00 | 0.98 | P   | 88.63   | 0.50 | 0.00 | P     | 43.60   | LOC91801      | 11q23.1       |
| 215786_at    | 1.00 | 0.97 | P   | 103.93  | 0.50 | 0.01 | P     | 51.00   |               |               |
| 229394_s_at  | 1.00 | 0.99 | P   | 804.47  | 0.50 | 0.01 | P     | 395.40  | GRLF1         | 19q13.3       |
| 209607_x_at  | 1.00 | 1.00 | P   | 511.13  | 0.50 | 0.00 | P     | 250.83  | SULT1A3       | 16p11.2       |
| 244669_at    | 1.00 | 0.96 | P   | 321.17  | 0.50 | 0.03 | P     | 158.63  |               | 6q15          |
| 243256_at    | 0.98 | 0.91 | P   | 122.30  | 0.50 | 0.02 | A     | 60.13   | MKNK1         | 1p34.1        |
| 202205_at    | 0.99 | 0.93 | P   | 655.50  | 0.50 | 0.00 | P     | 323.10  | VASP          | 19q13.2-q13.3 |
| 225900_at    | 1.00 | 0.99 | P,A | 166.93  | 0.50 | 0.00 | A     | 82.20   | SEC15L2       | 2p13.2        |
| 226223_at    | 0.99 | 0.94 | P   | 607.23  | 0.50 | 0.01 | P     | 299.40  | PAWR          | 12q21         |
| 218526_s_at  | 1.00 | 0.98 | P   | 395.03  | 0.50 | 0.00 | P     | 194.57  | RANGNRF       | 17p13         |
| 39582_at     | 1.00 | 0.96 | P   | 120.10  | 0.50 | 0.03 | P     | 59.57   | CYLD          | 16q12-q13     |
| 221860_at    | 1.00 | 0.97 | P   | 142.33  | 0.50 | 0.03 | P,M,A | 70.90   | HNRPL         | 19q13.2       |
| 226602_s_at  | 1.00 | 0.95 | P   | 273.30  | 0.50 | 0.01 | P     | 134.37  | BCR           | 22q11         |
| 218235_s_at  | 0.99 | 0.93 | P   | 1250.10 | 0.50 | 0.01 | P     | 617.40  | CGI-94        | 1p34.2        |
| 240636_at    | 0.99 | 0.93 | P   | 113.50  | 0.50 | 0.00 | P     | 55.57   |               |               |
| 226385_s_at  | 1.00 | 0.98 | P   | 2989.47 | 0.50 | 0.01 | P     | 1470.63 | C7orf30       | 7p15.3        |
