# Supplementary material for: Multi-Platform Whole-Genome Microarray Analyses Refine the Epigenetic Signature of Breast Cancer Metastasis with Gene Expression and Copy Number
Source: PubMed Central journal article supplement (PMC2801616; doi:10.1371/journal.pone.0008665), 2010-01-13
Supplement: pone.0008665.s007.pdf [file pone.0008665.s007.pdf]

**Supplemental Table 6: Genes Hypermethylated AND Decreased in expression, no change in copy number (Venn region 1)**

| Affy Probe ID | Expression fold change | Common      | Map           |
|---------------|------------------------|-------------|---------------|
| 215729_s_at   | -100.00                | VGLL1       | xq26.3        |
| 223315_at     | -60.33                 | NTN4        | 12q22-q23     |
| 224901_at     | -55.92                 | SCD4        | 4q21.3        |
| 218804_at     | -53.52                 | TMEM16A     | 11q13.2       |
| 205980_s_at   | -48.11                 | ARHGAP8     | 22q13.31      |
| 201820_at     | -45.17                 | KRT5        | 12q12-q13     |
| 223374_s_at   | -36.31                 | B3GALT3     | 3q25          |
| 210059_s_at   | -31.97                 | MAPK13      | 6p21.31       |
| 37117_at      | -24.03                 | ARHGAP8     | 22q13.31      |
| 225664_at     | -22.30                 | COL12A1     | 6q12-q13      |
| 223748_at     | -21.78                 | SLC4A11     | 20p12         |
| 205916_at     | -21.25                 | S100A7      | 1q21          |
| 202489_s_at   | -20.77                 | FXYP3       | 19q13.13      |
| 218309_at     | -17.67                 | CaMKIIalpha | 1p36.13       |
| 205990_s_at   | -15.95                 | WNT5A       | 3p21-p14      |
| 213308_at     | -15.78                 | SHANK2      | 11q13.2       |
| 231766_s_at   | -15.21                 | COL12A1     | 6q12-q13      |
| 229245_at     | -13.73                 | PEPP3       | 1q32.1        |
| 209894_at     | -12.37                 | LEPR        | 1p31          |
| 204664_at     | -12.31                 | ALPP        | 2q37          |
| 203535_at     | -12.16                 | S100A9      | 1q21          |
| 228249_at     | -11.76                 | LOC119710   | 11p13         |
| 211812_s_at   | -11.76                 | B3GALT3     | 3q25          |
| 223949_at     | -11.45                 | TMPPRSS3    | 21q22.3       |
| 33323_r_at    | -11.45                 | SFN         | 1p35.3        |
| 202995_s_at   | -10.74                 | FBLN1       | 22q13.31      |
| 205258_at     | -10.60                 | INHBB       | 2cen-q13      |
| 202552_s_at   | -10.42                 | CRIM1       | 2p21          |
| 203713_s_at   | -10.16                 | LLGL2       | 17q24-q25     |
| 201596_x_at   | -10.09                 | KRT18       | 12q13         |
| 205487_s_at   | -9.88                  | VGLL1       | xq26.3        |
| 209605_at     | -9.75                  | TST         | 22q13.1       |
| 215125_s_at   | -9.56                  | UGT1A10     | 2q37          |
| 201842_s_at   | -9.46                  | EFEMP1      | 2p16          |
| 202551_s_at   | -9.44                  | CRIM1       | 2p21          |
| 223895_s_at   | -9.33                  | EPN3        | 17q21.33      |
| 235626_at     | -9.25                  | CAMK1D      | 10p14         |
| 209260_at     | -9.12                  | SFN         | 1p35.3        |
| 220177_s_at   | -9.05                  | TMPPRSS3    | 21q22.3       |
| 213603_s_at   | -8.43                  | RAC2        | 22q13.1       |
| 229927_at     | -8.37                  | LOC93273    | 1q32.1        |
| 212531_at     | -8.35                  | LCN2        | 9q34          |
| 219580_s_at   | -8.28                  | TMC5        | 16p13.11      |
| 210058_at     | -8.02                  | MAPK13      | 6p21.31       |
| 219797_at     | -7.97                  | MGAT4A      | 2q12          |
| 219532_at     | -7.91                  | ELOVL4      | 6q14          |
| 227342_s_at   | -7.79                  | MYEOV       | 11q13         |
| 222830_at     | -7.69                  | TFCP2L2     | 2p25.1        |
| 208006_at     | -7.23                  | FOXJ1       | 5q34          |
| 224724_at     | -7.19                  | SULF2       | 20q12-q13.2   |
| 210026_s_at   | -6.96                  | CARD10      | 22q13.1       |
| 215189_at     | -6.92                  | KRTHB6      | 12q13         |
| 201787_at     | -6.91                  | FBLN1       | 22q13.31      |
| 228302_x_at   | -6.60                  | CaMKIIalpha | 1p36.13       |
| 218764_at     | -6.59                  | PRKCH       | 14q22-q23     |
| 33322_l_at    | -6.44                  | SFN         | 1p35.3        |
| 243681_at     | -6.43                  | SHANK2      | 11q13.2       |
| 211538_s_at   | -6.00                  |             |               |
| 202812_at     | -6.00                  | GAA         | 7q25.2-q25.3  |
| 218086_at     | -5.98                  | NPDC1       | 9q34.3        |
| 203571_s_at   | -5.90                  | C10orf116   | 10q23.31      |
| 216288_s_at   | -5.87                  | JAG1        | 9p12.1-p11.23 |
| 211725_s_at   | -5.60                  | BID         | 22q11.1       |
| 218928_s_at   | -5.55                  | SLC37A1     | 21q22.3       |
| 206125_s_at   | -5.42                  | KLK6        | 9q13.3-q13.4  |
| 222582_at     | -5.37                  | PRKAG2      | 7q35-q36      |
| 204908_s_at   | -5.32                  | BCL3        | 9q13.1-q13.2  |
| 212706_at     | -5.32                  | RASA4       | 7q22-q31.1    |
| 213425_at     | -5.30                  | WNT5A       | 3p21-p14      |
| 208161_s_at   | -5.28                  | ABCC3       | 17q22         |
| 1554006_a_at  | -5.27                  | LLGL2       | 17q24-q25     |
| 203085_s_at   | -5.26                  | TGFB1       | 19q13.1       |
| 218490_s_at   | -5.23                  | ZNF302      | 19q13.12      |
| 203287_at     | -5.21                  | LAD1        | 1q25.1-q32.3  |
| 208763_s_at   | -5.16                  | DSIP1       | xq22.3        |
| 223194_s_at   | -5.15                  | C6orf85     | 6p25.2        |
| 219411_at     | -5.02                  | ELMO3       | 16q22.1       |
| 224792_at     | -4.87                  | TNKS1BP1    | 11q12.1       |
| 238017_at     | -4.85                  | RDHE2       | 8q12.1        |
| 216641_s_at   | -4.83                  | LAD1        | 1q25.1-q32.3  |
| 228176_at     | -4.81                  | EDG3        | 9q22.1-q22.2  |
| 233555_s_at   | -4.76                  | SULF2       | 20q12-q13.2   |
| 210261_at     | -4.71                  | KCNK2       | 1q41          |
| 209641_s_at   | -4.65                  | ABCC3       | 17q22         |
| 205093_at     | -4.54                  | PEPP3       | 1q32.1        |
| 238149_at     | -4.52                  |             | 19q13.42      |
| 209099_x_at   | -4.51                  | JAG1        | 9p12.1-p11.23 |
| 205593_s_at   | -4.46                  | PDE9A       | 21q22.3       |
| 220959_s_at   | -4.19                  | OBP2A       | 9q34          |
| 225373_at     | -4.18                  | PP2135      | 10q22.3       |
| 225475_at     | -4.17                  | MI-ER1      | 1p31.3        |
| 226246_at     | -4.16                  | KCTD1       | 18q12.1       |
| 219010_at     | -4.14                  | FLJ10901    | 1q32.1        |
| 1557129_a_at  | -4.11                  | CANP        | 11q12.2       |
| 227053_at     | -4.04                  | PACSN1      | 6p21.3        |
| 201843_s_at   | -4.03                  | EFEMP1      | 2p16          |
| 218019_s_at   | -4.01                  | C21orf97    | 21q22.3       |
| 214240_at     | -3.96                  | GAL         | 11q13.1       |
| 226245_at     | -3.89                  | KCTD1       | 18q12.1       |

|              |       |              |               |
|--------------|-------|--------------|---------------|
| 208596_s_at  | -3.83 | UGT1A10      | 2q37          |
| 218856_at    | -3.82 | TNFRSF21     | 6p21.1-12.2   |
| 223435_s_at  | -3.75 | PCDHA6       | 5q31          |
| 235729_at    | -3.74 | ZNF514       | 2q11.2        |
| 203149_at    | -3.61 | PVRL2        | 9q13.2-q13.4  |
| 220945_x_at  | -3.60 | MANSC1       | 12p13.2       |
| 234192_s_at  | -3.57 | GKAP1        | 9q22.1        |
| 39966_at     | -3.56 | CSPG5        | 3p21.3        |
| 224492_s_at  | -3.51 | ZNF627       | 19p13.2       |
| 214958_s_at  | -3.50 | EVER1        | 17q25.3       |
| 206276_at    | -3.47 | LY6D         | 8q24-qter     |
| 207419_s_at  | -3.44 | RAC2         | 22q13.1       |
| 229534_at    | -3.43 | PTE2B        | 14q24.2       |
| 1554179_s_at | -3.43 | LYNX1        | 8q24.3        |
| 218263_s_at  | -3.38 | LOC58486     | 11p15.3       |
| 227429_at    | -3.31 | MGC45840     | 11p15.5       |
| 235165_at    | -3.29 | PARDB6B      | 20q13.13      |
| 207802_at    | -3.27 | CRISP3       | 6p12.3        |
| 210674_s_at  | -3.26 | PCDHAC2      | 5q31          |
| 201681_s_at  | -3.24 | DLG5         | 10q23         |
| 206827_s_at  | -3.21 | TRPV6        | 7q33-q34      |
| 228393_s_at  | -3.20 | ZNF302       | 19q13.12      |
| 204328_at    | -3.17 | EVER1        | 17q25.3       |
| 210069_at    | -3.16 | CPT1B        | 22q13.33      |
| 220246_at    | -3.13 | CAMK1D       | 10p14         |
| 242871_at    | -3.10 | MPRG         | 15q22.31      |
| 225354_s_at  | -3.08 | SH3BGRL2     | 6q13-15       |
| 205265_s_at  | -3.04 | APEG1        | 2q36.1        |
| 209502_s_at  | -3.03 | BAIAP2       | 17q25         |
| 214697_s_at  | -3.03 | ROD1         | 9q33.1        |
| 221614_s_at  | -2.98 | RPH3AL       | 17p13.3       |
| 209751_s_at  | -2.98 | SEDLP        | 19q13.4       |
| 207126_x_at  | -2.96 | UGT1A10      | 2q37          |
| 215299_x_at  | -2.95 | SULT1A1      | 16p12.1       |
| 235515_at    | -2.95 | FLJ36445     | 19q13.13      |
| 204379_s_at  | -2.93 | FGFR3        | 4p16.3        |
| 205109_s_at  | -2.92 | ARHGEF4      | 2q22          |
| 223179_at    | -2.91 | MGC10500     | 16p12.1       |
| 225940_at    | -2.90 | MGC39820     | 3p14          |
| 215001_s_at  | -2.88 | GLUL         | 1q31          |
| 208078_s_at  | -2.88 | TCF8         | 10p11.2       |
| 213307_at    | -2.84 | SHANK2       | 11q13.2       |
| 202994_s_at  | -2.83 | FBLN1        | 22q13.31      |
| 220318_at    | -2.81 | EPN3         | 17q21.33      |
| 204579_at    | -2.80 | FGFR4        | 5q35.1-qter   |
| 201791_s_at  | -2.79 | DHCR7        | 1q13.2-q13.5  |
| 212131_at    | -2.79 | C19orf13     | 19q13.12      |
| 205807_s_at  | -2.77 | TUFT1        | 1q21          |
| 212443_at    | -2.77 | KIAA0540     | 3p21.31       |
| 210538_s_at  | -2.77 | BIRC3        | 11q22         |
| 218292_s_at  | -2.76 | PRKAG2       | 7q35-q36      |
| 224212_s_at  | -2.72 | PCDHA6       | 5q31          |
| 208373_s_at  | -2.71 | P2RY6        | 11q13.5       |
| 204532_x_at  | -2.68 | UGT1A6       | 2q37          |
| 202712_s_at  | -2.68 | CKMT1        | 15q15         |
| 216470_x_at  | -2.66 | PRSS3        | 9p11.2        |
| 232422_at    | -2.64 | LOC87769     | 13q32.3       |
| 1555420_a_at | -2.63 | KLF7         | 2q32          |
| 204589_at    | -2.62 | ARK5         | 12q24.11      |
| 1555105_a_at | -2.61 | MI-ER1       | 1p31.3        |
| 208998_at    | -2.58 | UCP2         | 11q13         |
| 204686_at    | -2.58 | IRS1         | 2q36          |
| 233748_x_at  | -2.56 | PRKAG2       | 7q35-q36      |
| 203615_x_at  | -2.55 | SULT1A1      | 16p12.1       |
| 220144_s_at  | -2.54 | ANKRD5       | 10pter-q11.23 |
| 207722_s_at  | -2.54 | BTBD2        | 19p13.3       |
| 212657_s_at  | -2.52 | IL1RN        | 2q14.2        |
| 225165_at    | -2.47 | PPP1R1B      | 17q21.2       |
| 218170_at    | -2.44 | CGI-111      | 3q22.1-q33.3  |
| 205632_s_at  | -2.42 | PIP5K1B      | 9q13          |
| 214733_s_at  | -2.41 | DJ167A19.1   | 1p33-p32.1    |
| 1553611_s_at | -2.41 | FLJ33790     | 11q13.3       |
| 229404_at    | -2.40 | TWIST2       | 2q37.3        |
| 209459_s_at  | -2.39 | ABAT         | 16p13.2       |
| 239853_at    | -2.39 | KLC2L        | 19q13         |
| 213526_s_at  | -2.38 | F25965       | 19q13.1       |
| 204517_at    | -2.36 | PPIC         | 5q23.2        |
| 211975_at    | -2.36 | ZNF289       | 1p11.2-p11.12 |
| 203317_at    | -2.35 | TIC          | 2q13          |
| 208997_s_at  | -2.30 | UCP2         | 11q13         |
| 218644_at    | -2.29 | PLEK2        | 14q24.1       |
| 204862_s_at  | -2.28 | NME3         | 16q13         |
| 223411_at    | -2.28 | AD023        | 17q25.2       |
| 206094_x_at  | -2.27 | UGT1A6       | 2q37          |
| 203620_s_at  | -2.26 | FCHSD2       | 11q13.3       |
| 39650_s_at   | -2.25 | FLJ11363     | 1q42.2        |
| 34726_at     | -2.25 | CACNB3       | 12q13         |
| 222810_s_at  | -2.24 | RASAL2       | 1q24          |
| 202365_at    | -2.24 | MGC5139      | 12q24.31      |
| 46256_at     | -2.23 | SSB3         | 16p13.3       |
| 32402_s_at   | -2.22 | SYMPK        | 19q13.3       |
| 209125_at    | -2.20 | KRT6A        | 12q12-q13     |
| 230120_s_at  | -2.19 | PLGL         | 2p11-q11      |
| 233550_s_at  | -2.19 | SLC4A11      | 20p12         |
| 226408_at    | -2.19 | TEAD2        | 19q13.3       |
| 223948_s_at  | -2.19 | TMPPRSS3     | 21q22.3       |
| 211237_s_at  | -2.19 | FGFR4        | 5q35.1-qter   |
| 215084_s_at  | -2.18 | MGC8974      | 1p33-p32.1    |
| 208009_s_at  | -2.18 | ARHGEF16     | 1p36.3        |
| 202357_s_at  | -2.17 | BF           | 6p21.3        |
| 204334_at    | -2.17 | KLF7         | 2q32          |
| 214580_x_at  | -2.17 | KRT6A        | 12q12-q13     |
| 223628_at    | -2.14 | DKFZp434N035 | 22q11.21      |

|              |       |          |              |
|--------------|-------|----------|--------------|
| 223665_at    | -2.14 | ARPM1    | 3q26.31      |
| 1555935_s_at | -2.13 | HUNK     | 21q22.1      |
| 219076_s_at  | -2.12 | PXMP2    | 12q24.33     |
| 218166_s_at  | -2.12 | HBXAP    | 11q13.4      |
| 243256_at    | -2.11 | MKNK1    | 1p34.1       |
| 223500_at    | -2.10 | CPLX1    | 4p16.3       |
| 206516_at    | -2.09 | AMH      | 19p13.3      |
| 239730_at    | -2.08 |          |              |
| 221599_at    | -2.08 | PTD015   | 11q13.4      |
| 212556_at    | -2.08 | SCRIB    | 8q24.3       |
| 213540_at    | -2.06 | HSD17B8  | 6p21.3       |
| 1552319_a_at | -2.03 | KLK8     | 9q13.3-q13.4 |
| 225898_at    | -2.02 | FLJ12953 | 2p13.1       |
| 222640_at    | -2.01 | DNMT3A   | 2p23         |
| 207517_at    | -2.01 | LAMC2    | 1q25-q31     |
| 227759_at    | -2.01 | PCSK9    | 1p32.3       |
| 1557128_at   | -2.00 | CANP     | 11q12.2      |
| 209110_s_at  | -2.00 | RAB2L    | 6p21.3       |
| 205871_at    | -1.98 | PLGL     | 2p11-q11     |
| 229312_s_at  | -1.93 | GKAP1    | 9q22.1       |
| 219749_at    | -1.93 | SH2D4A   | 8p21.2       |
| 210070_s_at  | -1.86 | CPT1B    | 22q13.33     |
| 202267_at    | -1.84 | LAMC2    | 1q25-q31     |
