# Supplementary material for: Multi-Platform Whole-Genome Microarray Analyses Refine the Epigenetic Signature of Breast Cancer Metastasis with Gene Expression and Copy Number
Source: PubMed Central journal article supplement (PMC2801616; doi:10.1371/journal.pone.0008665), 2010-01-13
Supplement: pone.0008665.s008.pdf [file pone.0008665.s008.pdf]

**Supplemental Table 7: Genes Hypermethylated AND Decreased in expression, loss in copy number (Venn region 2)**

| Probe set ID | 468GFP-LN/468GFP<br>Fold Decrease | Common           | Description                                                                                        |
|--------------|-----------------------------------|------------------|----------------------------------------------------------------------------------------------------|
| 231856_at    | -100.00                           | KIAA1244         | KIAA1244                                                                                           |
| 225175_s_at  | -100.00                           | CTL2             | CTL2 gene                                                                                          |
| 224609_at    | -100.00                           | CTL2             | CTL2 gene                                                                                          |
| 219850_s_at  | -100.00                           | EHF              | ets homologous factor                                                                              |
| 217764_s_at  | -100.00                           | RAB31            | RAB31, member RAS oncogene family                                                                  |
| 217763_s_at  | -100.00                           | RAB31            | RAB31, member RAS oncogene family                                                                  |
| 217762_s_at  | -100.00                           | RAB31            | RAB31, member RAS oncogene family                                                                  |
| 215172_at    | -100.00                           | DKFZP566K0524    | DKFZP566K0524 protein                                                                              |
| 210095_s_at  | -100.00                           | IGFBP3           | insulin-like growth factor binding protein 3                                                       |
| 209602_s_at  | -100.00                           | GATA3            | GATA binding protein 3                                                                             |
| 208091_s_at  | -100.00                           | DKFZP564K0822    | hypothetical protein DKFZp564K0822                                                                 |
| 203028_s_at  | -100.00                           | CYBA             | cytochrome b-245, alpha polypeptide                                                                |
| 201983_s_at  | -100.00                           | EGFR             | epidermal growth factor receptor (erythroblastic leukemia viral (v-erb-b) oncogene homolog, avian) |
| 200606_at    | -100.00                           | DSP              | desmoplakin                                                                                        |
| 206067_s_at  | -95.54                            | WT1              | Wilms tumor 1                                                                                      |
| 216905_s_at  | -94.77                            | ST14             | Human SNC19 mRNA sequence.                                                                         |
| 221645_s_at  | -84.87                            | ZNF83            | zinc finger protein 83 (HPF1)                                                                      |
| 212143_s_at  | -81.91                            | IGFBP3           | insulin-like growth factor binding protein 3                                                       |
| 220289_s_at  | -74.94                            | AIM1L            | absent in melanoma 1-like                                                                          |
| 206400_at    | -72.74                            | LGALS7           | lectin, galactoside-binding, soluble, 7 (galectin 7)                                               |
| 218162_at    | -61.48                            | OLFML3           | HNOEL-iso protein                                                                                  |
| 208165_s_at  | -58.98                            | PRSS16           | protease, serine, 16 (thymus)                                                                      |
| 228600_x_at  | -58.44                            | MGC72075         | hypothetical protein MGC72075                                                                      |
| 237493_at    | -57.47                            | IL22RA2          | ht73g10.x1 NCL_CGAP_Lu24 Homo sapiens cDNA clone IMAGE:3152418 3', mRNA sequence.                  |
| 225016_at    | -56.31                            | APCDD1           | adenomatosis polyposis coli down-regulated 1                                                       |
| 206142_at    | -54.34                            | ZNF135           | zinc finger protein 135 (clone pHZ-17)                                                             |
| 209173_at    | -51.84                            | AGR2             | anterior gradient 2 homolog (Xenopus laevis)                                                       |
| 1560201_at   | -51.56                            | FLJ39963         | hypothetical protein FLJ39963                                                                      |
| 202177_at    | -49.41                            | GAS6             | growth arrest-specific 6                                                                           |
| 232361_s_at  | -48.95                            | EHF              | ets homologous factor                                                                              |
| 219429_at    | -48.32                            | FA2H             | fatty acid 2-hydroxylase                                                                           |
| 204730_at    | -47.83                            | RIMS3            |                                                                                                    |
| 201984_s_at  | -46.93                            | EGFR             | epidermal growth factor receptor (erythroblastic leukemia viral (v-erb-b) oncogene homolog, avian) |
| 205547_s_at  | -46.72                            | TAGLN            | transgelin                                                                                         |
| 211341_at    | -44.44                            | POU4F1           | POU domain, class 4, transcription factor 1                                                        |
| 1554897_s_at | -44.44                            | RHBDL2           | rhomboid, veinlet-like 2 (Drosophila)                                                              |
| 215537_x_at  | -43.89                            | DDAH2            |                                                                                                    |
| 224189_x_at  | -43.69                            | EHF              | ets homologous factor                                                                              |
| 211607_x_at  | -40.44                            | EGFR             | epidermal growth factor receptor (erythroblastic leukemia viral (v-erb-b) oncogene homolog, avian) |
| 218960_at    | -40.07                            | TMPRSS4          |                                                                                                    |
| 202005_at    | -39.02                            | ST14             | suppression of tumorigenicity 14 (colon carcinoma, matrilysin, epithin)                            |
| 204855_at    | -37.53                            | SERPINB5         | serine (or cysteine) proteinase inhibitor, clade B (ovalbumin), member 5                           |
| 1555724_s_at | -36.16                            | TAGLN            | transgelin                                                                                         |
| 203421_at    | -34.50                            | TP53I1           | tumor protein p53 inducible protein 11                                                             |
| 209270_at    | -34.17                            | LAMB3            | laminin, beta 3                                                                                    |
| 214667_s_at  | -33.35                            | TP53I1           | tumor protein p53 inducible protein 11                                                             |
| 204083_s_at  | -30.66                            | TPM2             | tropomyosin 2 (beta)                                                                               |
| 209538_at    | -30.30                            | ZNF32            | zinc finger protein 32 (KOX 30)                                                                    |
| 209691_s_at  | -29.80                            | DOK4             | docking protein 4                                                                                  |
| 205048_s_at  | -29.21                            | PSPH             |                                                                                                    |
| 204179_at    | -28.28                            | MBP              | myoglobin                                                                                          |
| 1554544_a_at | -27.45                            | MBP              | CDNA clone MGC:70813 IMAGE:6060520, complete cds                                                   |
| 1554246_at   | -27.37                            | MGC52423         | hypothetical protein MGC52423                                                                      |
| 222240_s_at  | -24.71                            | ISYNA1           | myo-inositol 1-phosphate synthase A1                                                               |
| 206382_s_at  | -23.54                            | BDNF             | brain-derived neurotrophic factor                                                                  |
| 236337_at    | -22.88                            | LOC221711        | hypothetical protein LOC221711                                                                     |
| 201510_at    | -22.62                            | ELF3             | E74-like factor 3 (ets domain transcription factor, epithelial-specific )                          |
| 217627_at    | -22.50                            | ZNF573           | zinc finger protein 573                                                                            |
| 209603_at    | -22.37                            | GATA3            | GATA binding protein 3                                                                             |
| 1552427_at   | -21.99                            | ZNF485           | zinc finger protein 485                                                                            |
| 209604_s_at  | -21.75                            | GATA3            | GATA binding protein 3                                                                             |
| 1552502_s_at | -21.49                            | RHBDL2           | rhomboid, veinlet-like 2 (Drosophila)                                                              |
| 216052_x_at  | -21.40                            | ARTN             |                                                                                                    |
| 218921_at    | -20.95                            | SIGIRR           | single Ig IL-1R-related molecule                                                                   |
| 238805_at    | -20.24                            | MGC14839         | similar to RIKEN cDNA 2310030G06 gene                                                              |
| 218810_at    | -20.12                            | FLJ23231         | hypothetical protein FLJ23231                                                                      |
| 216468_s_at  | -19.66                            | LOC91120         |                                                                                                    |
| 219522_at    | -19.31                            | FJX1             | four jointed box 1 (Drosophila)                                                                    |
| 222561_at    | -19.14                            | LANCL2           | LanC lantibiotic synthetase component C-like 2 (bacterial)                                         |
| 220027_s_at  | -18.78                            | RASIP1           | Ras-interacting protein                                                                            |
| 209873_s_at  | -18.41                            | PKP3             | plakophilin 3                                                                                      |
| 205646_s_at  | -18.00                            | PAX6             | paired box gene 6 (aniridia, keratitis)                                                            |
| 212654_at    | -17.24                            | TPM2             | tropomyosin 2 (beta)                                                                               |
| 216953_s_at  | -16.92                            | WT1              | Wilms tumor 1                                                                                      |
| 204019_s_at  | -16.84                            | SH3YL1           | SH3 domain containing, Ysc84-like 1 (S. cerevisiae)                                                |
| 206723_s_at  | -16.22                            | EDG4             | endothelial differentiation, lysophosphatidic acid G-protein-coupled receptor, 4                   |
| 218219_s_at  | -16.09                            | LANCL2           | LanC lantibiotic synthetase component C-like 2 (bacterial)                                         |
| 206876_at    | -15.38                            |                  | match; proteins: Sw:P81133 Sw:Q61045; Human DNA sequence from clone RP3-399E4 on chromosome 6.     |
| 207291_at    | -15.37                            | TMG4             | transmembrane gamma-carboxylglutamic acid protein 4                                                |
| 220362_at    | -14.81                            | PSORS1C1         | psoriasis susceptibility 1 candidate 1                                                             |
| 214909_s_at  | -14.48                            | DDAH2            | dimethylarginine dimethylaminohydrolase 2                                                          |
| 52940_at     | -14.23                            | SIGIRR           | single Ig IL-1R-related molecule                                                                   |
| 201631_s_at  | -13.49                            | IER3             | immediate early response 3                                                                         |
| 222774_s_at  | -13.45                            | NETO2            | neuropilin (NRP) and tollid (TLL)-like 2                                                           |
| 205514_at    | -13.41                            | ZNF415           | zinc finger protein 415                                                                            |
| 204401_at    | -12.99                            | KCNNA4           | potassium intermediate/small conductance calcium-activated channel, subfamily N, member 4          |
| 221646_s_at  | -12.96                            | ZNF399; FLJ13153 | Homo sapiens GL013 mRNA, complete cds.                                                             |
| 203687_at    | -12.91                            | CX3CL1           | chemokine (C-X3-C motif) ligand 1                                                                  |
| 206722_s_at  | -12.41                            | EDG4             | endothelial differentiation, lysophosphatidic acid G-protein-coupled receptor, 4                   |
| 218888_s_at  | -12.39                            | NETO2            | neuropilin (NRP) and tollid (TLL)-like 2                                                           |
| 210827_s_at  | -12.31                            | ELF3             | E74-like factor 3 (ets domain transcription factor, epithelial-specific )                          |
| 203126_at    | -12.29                            | IMP2             | inositol(myo)-1(or 4)-monophosphatase 2                                                            |
| 201242_s_at  | -11.89                            | ATP1B1           | ATPase, Na+/K+ transporting, beta 1 polypeptide                                                    |
| 203365_s_at  | -11.71                            | MMP15            | matrix metalloproteinase 15 (membrane-inserted)                                                    |
| 219567_s_at  | -11.66                            | FLJ21144         | hypothetical protein FLJ21144                                                                      |
| 203920_at    | -11.20                            | NR1H3            | nuclear receptor subfamily 1, group H, member 3                                                    |

|              |        |              |                                                                                                         |
|--------------|--------|--------------|---------------------------------------------------------------------------------------------------------|
| 212859_x_at  | -11.16 | MT1E         | metallothionein 2A                                                                                      |
| 219266_at    | -10.99 | ZNF350       | zinc finger protein 350                                                                                 |
| 221081_s_at  | -10.99 | FLJ22457     | hypothetical protein FLJ22457                                                                           |
| 210237_at    | -10.69 | ARTN         | artemin                                                                                                 |
| 201462_at    | -10.65 | SCRN1        | secernin 1                                                                                              |
| 223659_at    | -10.14 | MSP          | mosaic serine protease                                                                                  |
| 223642_at    | -10.09 | ZIC2         | Zic family member 2 (odd-paired homolog, Drosophila)                                                    |
| 221655_x_at  | -9.92  | EPS8L1       | EPS8-like 1                                                                                             |
| 214734_at    | -9.76  | SLAC2-B      | SLAC2-B                                                                                                 |
| 1552477_a_at | -9.57  | IRF6         | interferon regulatory factor 6                                                                          |
| 223432_at    | -9.24  | OSBP2        | oxysterol binding protein 2                                                                             |
| 91826_at     | -8.76  | EPS8L1       | EPS8-like 1                                                                                             |
| 202262_x_at  | -8.72  | DDAH2        | dimethylarginine dimethylaminohydrolase 2                                                               |
| 225129_at    | -8.70  | CPNE2        | copine II                                                                                               |
| 203741_s_at  | -8.68  | ADCY7        | adenylate cyclase 7                                                                                     |
| 201243_s_at  | -8.36  | ATP1B1       | ATPase, Na <sup>+</sup> /K <sup>+</sup> transporting, beta 1 polypeptide                                |
| 218779_x_at  | -8.36  | EPS8L1       | EPS8-like 1                                                                                             |
| 209357_at    | -8.14  | CITED2       | Cbp/p300-interacting transactivator, with Glu/Asp-rich carboxy-terminal domain, 2                       |
| 203585_at    | -8.14  | ZNF185       | zinc finger protein 185 (LIM domain)                                                                    |
| 209872_s_at  | -8.01  | PKP3         | plakophilin 3                                                                                           |
| 221665_s_at  | -7.83  | EPS8L1       | EPS8-like 1                                                                                             |
| 226650_at    | -7.82  | LOC90637     | hypothetical protein LOC90637                                                                           |
| 228517_at    | -7.74  | FLJ11730     | hypothetical protein FLJ11730                                                                           |
| 207980_s_at  | -7.69  | CITED2       | Cbp/p300-interacting transactivator, with Glu/Asp-rich carboxy-terminal domain, 2                       |
| 204656_at    | -7.68  | MCART1       |                                                                                                         |
| 222902_s_at  | -7.49  | FLJ21144     | hypothetical protein FLJ21144                                                                           |
| 205194_at    | -7.35  | PSPH         | phosphoserine phosphatase                                                                               |
| 1569107_s_at | -7.32  | FLJ16030     | FLJ16030 protein                                                                                        |
| 203027_s_at  | -7.06  | MVD          | mevalonate (diphospho) decarboxylase                                                                    |
| 204681_s_at  | -6.98  | RAPGEF5      | Rap guanine nucleotide exchange factor (GEF) 5                                                          |
| 218982_s_at  | -6.96  | MRPS17       | mitochondrial ribosomal protein S17                                                                     |
| 235953_at    | -6.88  | ZNF610       | hypothetical protein FLJ36040                                                                           |
| 225406_at    | -6.69  | TWSG1        | twisted gastrulation homolog 1 (Drosophila)                                                             |
| 210136_at    | -6.56  |              | myelin basic protein                                                                                    |
| 205437_at    | -6.29  | ZNF211       | zinc finger protein 211                                                                                 |
| 210239_at    | -6.28  | IRX5         | iroquois homeobox protein 5                                                                             |
| 219354_at    | -6.22  | FLJ11078     | hypothetical protein FLJ11078                                                                           |
| 204928_s_at  | -6.19  | SLC10A3      | solute carrier family 10 (sodium/bile acid cotransporter family), member 3                              |
| 205020_s_at  | -6.09  | ARL4A        | ADP-ribosylation factor-like 4                                                                          |
| 212056_at    | -5.92  | KIAA0182     | KIAA0182 protein                                                                                        |
| 227045_at    | -5.75  | ZNF614       | FLJ21941 protein                                                                                        |
| 212057_at    | -5.71  | KIAA0182     | zq55f01.s1 Stratagene neuroepithelium (#937231) Homo sapiens cDNA clone IMAGE:645529 3', mRNA sequence. |
| 203359_s_at  | -5.67  | MYCBP        | c-myc binding protein                                                                                   |
| 204106_at    | -5.61  | TESK1        | testis-specific kinase 1                                                                                |
| 202743_at    | -5.61  | PIK3R3       | 601440792T1 NIH_MGC_72 Homo sapiens cDNA clone IMAGE:3915695 3', mRNA sequence.                         |
| 219622_at    | -5.51  | RAB20        | RAB20, member RAS oncogene family                                                                       |
| 201594_s_at  | -5.48  | PPP4R1       | protein phosphatase 4, regulatory subunit 1                                                             |
| 221843_s_at  | -5.36  | KIAA1609     | KIAA1609 protein                                                                                        |
| 204029_at    | -5.26  | CELSR2       | cadherin, EGF LAG seven-pass G-type receptor 2 (flamingo homolog, Drosophila)                           |
| 202727_s_at  | -5.26  | IFNGR1       | interferon gamma receptor 1                                                                             |
| 220419_s_at  | -5.26  | USP25        | ubiquitin specific protease 25                                                                          |
| 238054_at    | -5.19  | ADPRHL1      | ADP-ribosylhydrolase like 1                                                                             |
| 204131_s_at  | -5.16  | FOXO3A       | yx83c03.s1 Soares melanocyte 2NbHM Homo sapiens cDNA clone IMAGE:268324 3', mRNA sequence.              |
| 203564_at    | -5.09  | FANCG        | Fanconi anemia, complementation group G                                                                 |
| 204773_at    | -4.99  | IL11RA       | interleukin 11 receptor, alpha                                                                          |
| 1555486_a_at | -4.99  | FLJ14213     | hypothetical protein FLJ14213                                                                           |
| 36499_at     | -4.98  | CELSR2       | cadherin, EGF LAG seven-pass G-type receptor 2 (flamingo homolog, Drosophila)                           |
| 219201_s_at  | -4.96  | TWSG1        | twisted gastrulation homolog 1 (Drosophila)                                                             |
| 213358_at    | -4.83  | KIAA0802     | KIAA0802 protein                                                                                        |
| 222234_s_at  | -4.83  | MGC3101      | hypothetical protein MGC3101                                                                            |
| 230281_at    | -4.76  | FLJ32702     | hypothetical protein FLJ32702                                                                           |
| 216336_x_at  | -4.74  | MT1E         |                                                                                                         |
| 1553695_a_at | -4.72  | NOD9         | NOD9 protein                                                                                            |
| 219383_at    | -4.72  | FLJ14213     | hypothetical protein FLJ14213                                                                           |
| 207675_x_at  | -4.70  | ARTN         | artemin                                                                                                 |
| 218432_at    | -4.62  | FBXO3        | F-box only protein 3                                                                                    |
| 1552283_s_at | -4.60  | ZDHC11       | zinc finger, DHHC domain containing 11                                                                  |
| 203509_at    | -4.59  | SORL1        | sortilin-related receptor, L(DLR class) A repeats-containing                                            |
| 823_at       | -4.59  | CX3CL1       | chemokine (C-X3-C motif) ligand 1                                                                       |
| 202844_s_at  | -4.58  | RALBP1       | ralA binding protein 1                                                                                  |
| 203484_at    | -4.52  | SEC61G       | Sec61 gamma subunit                                                                                     |
| 217759_at    | -4.50  | TRIM44       | tripartite motif-containing 44                                                                          |
| 210652_s_at  | -4.48  | C1orf34      | chromosome 1 open reading frame 34                                                                      |
| 228065_at    | -4.47  | BCL9L        | B-cell CLL/lymphoma 9-like                                                                              |
| 239492_at    | -4.45  | SEC14L4      | SEC14-like 4 (S. cerevisiae)                                                                            |
| 239007_at    | -4.43  | ZNF616       | 602323789F1 NIH_MGC_89 Homo sapiens cDNA clone IMAGE:4426679 5', mRNA sequence.                         |
| 217165_x_at  | -4.39  | MT2A         | human metallothionein-I <sub>f</sub> ; Human metallothionein-I <sub>f</sub> gene (hMT-I <sub>f</sub> ). |
| 204657_s_at  | -4.35  | SHB          | SHB (Src homology 2 domain containing) adaptor protein B                                                |
| 213629_x_at  | -4.32  | MT1F         | metallothionein 1F (functional)                                                                         |
| 234963_s_at  | -4.22  | FA2H         | Homo sapiens Chromosome 16 BAC clone CIT987SK-A-233A8, complete sequence.                               |
| 218854_at    | -4.18  | SART2        | squamous cell carcinoma antigen recognized by T cells 2                                                 |
| 222392_x_at  | -4.05  | PERP         | PERP, TP53 apoptosis effector                                                                           |
| 227215_at    | -4.02  | GOPC         | golgi associated PDZ and coiled-coil motif containing                                                   |
| 205042_at    | -3.94  | GNE          | glucosamine (UDP-N-acetyl)-2-epimerase/N-acetylmannosamine kinase                                       |
| 203360_s_at  | -3.88  | MYCBP        | c-myc binding protein                                                                                   |
| 218744_s_at  | -3.85  | PACSN3       | protein kinase C and casein kinase substrate in neurons 3                                               |
| 217760_at    | -3.84  | TRIM44       | tripartite motif-containing 44                                                                          |
| 212268_at    | -3.78  | SERPINB1     | serine (or cysteine) proteinase inhibitor, clade B (ovalbumin), member 1                                |
| 202031_s_at  | -3.72  | DKFZP434J154 | DKFZP434J154 protein                                                                                    |
| 206770_s_at  | -3.71  | SLC35A3      | solute carrier family 35 (UDP-N-acetylglucosamine (UDP-GlcNAc) transporter), member A3                  |
| 226127_at    | -3.57  | DEPC-1       | prostate cancer antigen-1                                                                               |
| 202554_s_at  | -3.55  | GSTM3        | glutathione S-transferase M3 (brain)                                                                    |
| 241869_at    | -3.54  | APOL6        | apolipoprotein L 6                                                                                      |
| 205781_at    | -3.46  | C16orf7      | chromosome 16 open reading frame 7                                                                      |
| 226287_at    | -3.46  | LOC81023     | NY-REN-41 antigen                                                                                       |
| 227718_at    | -3.44  | PURB         | purine-rich element binding protein B                                                                   |
| 211593_s_at  | -3.43  | MAST2        | microtubule associated serine/threonine kinase 2                                                        |
| 225988_at    | -3.43  | HERC4        | DKFZP564G092 protein                                                                                    |
| 219001_s_at  | -3.39  | MGC10765     | hypothetical protein MGC10765                                                                           |
| 234921_at    | -3.39  |              |                                                                                                         |
| 202845_s_at  | -3.38  | RALBP1       | ralA binding protein 1                                                                                  |
| 226957_x_at  | -3.36  | RALBP1       | ralA binding protein 1                                                                                  |
| 202738_s_at  | -3.33  | PHKB         | phosphorylase kinase, beta                                                                              |

|              |       |              |                                                                                                                             |
|--------------|-------|--------------|-----------------------------------------------------------------------------------------------------------------------------|
| 204613_at    | -3.33 | PLCG2        | phospholipase C, gamma 2 (phosphatidylinositol-specific)                                                                    |
| 220127_s_at  | -3.30 | FBXL12       | F-box and leucine-rich repeat protein 12                                                                                    |
| 52285_f_at   | -3.29 | C18orf9      | chromosome 18 open reading frame 9                                                                                          |
| 213572_s_at  | -3.29 | SERPINB1     | serine (or cysteine) proteinase inhibitor, clade B (ovalbumin), member 1                                                    |
| 203067_at    | -3.27 | PDHX         | pyruvate dehydrogenase complex, component X                                                                                 |
| 204264_at    | -3.25 | CPT2         | carnitine palmitoyltransferase II                                                                                           |
| 223167_s_at  | -3.24 | USP25        | ubiquitin specific protease 25                                                                                              |
| 209865_at    | -3.23 | SLC35A3      | solute carrier family 35 (UDP-N-acetylglucosamine (UDP-GlcNAc) transporter), member A3                                      |
| 220150_s_at  | -3.23 | C6orf60      | chromosome 6 open reading frame 60                                                                                          |
| 1552828_a_at | -3.21 | FLJ22313     | hypothetical protein FLJ22313                                                                                               |
| 218735_s_at  | -3.20 | ZNF544       | zinc finger protein 544                                                                                                     |
| 1598_g_at    | -3.20 | GAS6         | growth arrest-specific 6                                                                                                    |
| 210502_s_at  | -3.19 | PPIE         | peptidylprolyl isomerase E (cyclophilin E)                                                                                  |
| 213137_s_at  | -3.17 | PTPN2        | protein tyrosine phosphatase, non-receptor type 2                                                                           |
| 235349_at    | -3.16 | FLJ32954     | hypothetical protein FLJ32954                                                                                               |
| 65438_at     | -3.15 | KIAA1609     | KIAA1609 protein                                                                                                            |
| 209432_s_at  | -3.15 | CREB3        | cAMP responsive element binding protein 3                                                                                   |
| 206461_x_at  | -3.14 | MT1H         | metallothionein 1H                                                                                                          |
| 213136_at    | -3.13 | PTPN2        | protein tyrosine phosphatase, non-receptor type 2                                                                           |
| 228652_at    | -3.10 | FLJ38288     | q151f03.x1 Soares_NhHMPu_S1 Homo sapiens cDNA clone IMAGE:1875869 3' similar to contains element MER29 repetitive element   |
| 223425_at    | -3.08 | RAVER1       |                                                                                                                             |
| 224992_s_at  | -3.08 | CMIP         | c-Maf-inducing protein                                                                                                      |
| 227255_at    | -3.07 | LOC149420    | wf14h01.x1 Soares_NFL_T_GBC_S1 Homo sapiens cDNA clone IMAGE:2350609 3', mRNA sequence.                                     |
| 224415_s_at  | -3.06 | HINT2        | histidine triad nucleotide binding protein 2                                                                                |
| 227616_at    | -3.05 | BCL9L        | B-cell CLL/lymphoma 9-like                                                                                                  |
| 238773_at    | -3.03 | FLJ33979     | hypothetical protein FLJ33979                                                                                               |
| 219311_at    | -3.03 | C18orf9      | chromosome 18 open reading frame 9                                                                                          |
| 203274_at    | -3.02 | F8A          | coagulation factor VIII-associated (intronic transcript)                                                                    |
| 215903_s_at  | -3.00 | MAST2        | microtubule associated serine/threonine kinase 2                                                                            |
| 201326_at    | -3.00 | CCT6A        | 601304610F1 NIH_MGC_39 Homo sapiens cDNA clone IMAGE:3639098 5', mRNA sequence.                                             |
| 222804_x_at  | -2.99 | MGC10765     | hypothetical protein MGC10765                                                                                               |
| 211721_s_at  | -2.96 | ZNF551       | zinc finger protein 551                                                                                                     |
| 202927_at    | -2.93 | PIN1         | ubiquitin-like 5                                                                                                            |
| 225002_s_at  | -2.92 | SUMF2        | h48a11.x1 NCI_CGAP_Mel15 Homo sapiens cDNA clone IMAGE:3149948 3' similar to contains Alu:contains MER35 repetitive element |
| 201327_s_at  | -2.88 | CCT6A        | chaperonin containing TCP1, subunit 6A (zeta 1)                                                                             |
| 202494_at    | -2.88 | PPIE         | peptidylprolyl isomerase E (cyclophilin E)                                                                                  |
| 208581_x_at  | -2.87 | MT1X         | metallothionein 1X                                                                                                          |
| 218011_at    | -2.87 | UBL5         | ubiquitin-like 5                                                                                                            |
| 221776_s_at  | -2.78 | BRD7         | bromodomain containing 7                                                                                                    |
| 212463_at    | -2.77 | CD59         | CD59 antigen p18-20 (antigen identified by monoclonal antibodies 16.3A5, EJ16, EJ30, EL32 and G344)                         |
| 204282_s_at  | -2.76 | FARS1        | phenylalanine-tRNA synthetase 1 (mitochondrial)                                                                             |
| 202049_s_at  | -2.76 | ZNF262       | zinc finger protein 262                                                                                                     |
| 219680_at    | -2.75 | NOD9         | NOD9 protein                                                                                                                |
| 202883_s_at  | -2.72 | PPP2R1B      | yd71a11.s1 Soares fetal liver spleen 1NFLS Homo sapiens cDNA clone IMAGE:113660 3', mRNA sequence.                          |
| 219854_at    | -2.71 | ZNF14        | zinc finger protein 14 (KOX 6)                                                                                              |
| 42361_g_at   | -2.70 | C6orf18      | chromosome 6 open reading frame 18                                                                                          |
| 219453_at    | -2.70 | C16orf44     | chromosome 16 open reading frame 44                                                                                         |
| 203266_s_at  | -2.68 | MAP2K4       | mitogen-activated protein kinase kinase 4                                                                                   |
| 201816_s_at  | -2.67 | GBAS         | glioblastoma amplified sequence                                                                                             |
| 218522_s_at  | -2.66 | BPY2IP1      | VCY2 interacting protein 1                                                                                                  |
| 204798_at    | -2.65 | MYB          | v-myb myeloblastosis viral oncogene homolog (avian)                                                                         |
| 204326_x_at  | -2.63 | MT1X         |                                                                                                                             |
| 222751_at    | -2.62 | FLJ22313     | hypothetical protein FLJ22313                                                                                               |
| 202414_at    | -2.62 | ERCC5        | excision repair cross-complementing rodent repair deficiency, comp. group 5 (xeroderma pigmentosum, compgroup G (Cockayne)  |
| 221059_s_at  | -2.60 | CHST6        | carbohydrate (N-acetylglucosamine 6-O) sulfotransferase 6                                                                   |
| 40569_at     | -2.60 | ZNF42        | Human zinc finger protein 42 (MZF-1) mRNA, complete cds.                                                                    |
| 213034_at    | -2.57 | KIAA0999     | KIAA0999 protein                                                                                                            |
| 224991_at    | -2.54 | CMIP         | c-Maf-inducing protein                                                                                                      |
| 202933_s_at  | -2.52 | YES1         | y-yes-1 Yamaguchi sarcoma viral oncogene homolog 1                                                                          |
| 224852_at    | -2.48 | TTC17        | tetratricopeptide repeat domain 17                                                                                          |
| 212641_at    | -2.48 | HIVEP2       | Human DNA sequence from clone RP1-67K17 on chromosome 6q24.1-24.3, complete sequence.                                       |
| 215068_s_at  | -2.47 | FLJ11467     | hypothetical protein FLJ11467                                                                                               |
| 205546_s_at  | -2.46 | TYK2         | tyrosine kinase 2                                                                                                           |
| 202511_s_at  | -2.46 | APG5L        | APG5 autophagy 5-like (S. cerevisiae)                                                                                       |
| 219543_at    | -2.45 | MAWBP        | MAWD binding protein                                                                                                        |
| 201948_at    | -2.45 | HUMAUAANTIG  | nucleolar GTPase                                                                                                            |
| 221208_s_at  | -2.40 | FLJ23342     | hypothetical protein FLJ23342                                                                                               |
| 1563497_at   | -2.40 | USP25        | ubiquitin specific protease 25                                                                                              |
| 205263_at    | -2.39 | BCL10        | B-cell CLL/lymphoma 10                                                                                                      |
| 37425_g_at   | -2.37 | C6orf18      | a-helix coiled-coil rod homologue; Homo sapiens HCR (a-helix coiled-coil rod homologue) gene, complete cds.                 |
| 225198_at    | -2.37 | VAPA         | VAMP (vesicle-associated membrane protein)-associated protein A, 33kDa                                                      |
| 211580_s_at  | -2.37 | PIK3R3       | phosphoinositide-3-kinase, regulatory subunit, polypeptide 3 (p55, gamma)                                                   |
| 211711_s_at  | -2.33 | PTEN         | phosphatase and tensin homolog (mutated in multiple advanced cancers 1)                                                     |
| 226261_at    | -2.30 | ZNRF2        | zinc finger/RING finger 2                                                                                                   |
| 204142_at    | -2.30 | HSRTSBETA    | rTS beta protein                                                                                                            |
| 204710_s_at  | -2.30 | DKFZP434J154 | DKFZP434J154 protein                                                                                                        |
| 232323_s_at  | -2.27 | TTC17        | tetratricopeptide repeat domain 17                                                                                          |
| 218528_s_at  | -2.27 | RNF38        | ring finger protein 38                                                                                                      |
| 219826_at    | -2.26 | FLJ23233     | hypothetical protein FLJ23233                                                                                               |
| 218165_at    | -2.25 | FLJ11730     | hypothetical protein FLJ11730                                                                                               |
| 225120_at    | -2.24 | PURB         | CDNA FLJ33107 fis, clone TRACH2000959                                                                                       |
| 207753_at    | -2.23 | ZNF304       | zinc finger protein 304                                                                                                     |
| 202439_s_at  | -2.22 | IDS          | iduronate 2-sulfatase (Hunter syndrome)                                                                                     |
| 204937_s_at  | -2.21 | ZNF274       | zinc finger protein 274                                                                                                     |
| 212479_s_at  | -2.21 | FLJ13910     | hypothetical protein FLJ13910                                                                                               |
| 219409_at    | -2.21 | SNIP1        | Smad nuclear interacting protein                                                                                            |
| 219307_at    | -2.18 | C6orf210     | chromosome 6 open reading frame 210                                                                                         |
| 224504_s_at  | -2.18 | MGC13125     | hypothetical protein MGC13125                                                                                               |
| 211724_x_at  | -2.18 | FLJ20323     | hypothetical protein FLJ20323                                                                                               |
| 203656_at    | -2.16 | KIAA0274     | KIAA0274                                                                                                                    |
| 204157_s_at  | -2.14 | KIAA0999     | KIAA0999 protein                                                                                                            |
| 204283_at    | -2.14 | FARS1        | phenylalanine-tRNA synthetase 1 (mitochondrial)                                                                             |
| 204132_s_at  | -2.11 | FOXO3A       | forkhead box O3A                                                                                                            |
| 222870_s_at  | -2.11 | B3GNT1       | UDP-GlcNAc:betaGal beta-1,3-N-acetylglucosaminyltransferase 1                                                               |
| 225480_at    | -2.10 | FLJ45459     | FLJ45459 protein                                                                                                            |
| 1553274_a_at | -2.06 | C6orf151     | chromosome 6 open reading frame 151                                                                                         |
| 218235_s_at  | -2.00 | CGI-94       | comparative gene identification transcript 94                                                                               |
| 217804_s_at  | -1.97 | ILF3         | interleukin enhancer binding factor 3, 90kDa                                                                                |
| 204935_at    | -1.95 | PTPN2        | protein tyrosine phosphatase, non-receptor type 2                                                                           |
| 202739_s_at  | -1.82 | PHKB         | phosphorylase kinase, beta                                                                                                  |
| 243439_at    | -1.73 |              | wq87e04.x1 NCI_CGAP_GC6 Homo sapiens cDNA clone IMAGE:2479038 3', mRNA sequence.                                            |
