# Supplementary material for: Multi-Platform Whole-Genome Microarray Analyses Refine the Epigenetic Signature of Breast Cancer Metastasis with Gene Expression and Copy Number
Source: PubMed Central journal article supplement (PMC2801616; doi:10.1371/journal.pone.0008665), 2010-01-13
Supplement: pone.0008665.s009.pdf [file pone.0008665.s009.pdf]

**Supplemental Table 8: Genes Hypomethylated AND Increased in expression, no change in copy number (Venn region 3)**

| Affy Probe ID | fold change | Common       | Map            | Description                                                                                                                                                                                                                                                                                                                                            |
|---------------|-------------|--------------|----------------|--------------------------------------------------------------------------------------------------------------------------------------------------------------------------------------------------------------------------------------------------------------------------------------------------------------------------------------------------------|
| 206427_s_at   | 139.46      | MLANA        | 9p24.1         | melan-A                                                                                                                                                                                                                                                                                                                                                |
| 206426_at     | 84.19       | MLANA        | 9p24.1         | melan-A                                                                                                                                                                                                                                                                                                                                                |
| 220534_at     | 37.14       | TRIM48       | 11q12.1        | tripartite motif-containing 48                                                                                                                                                                                                                                                                                                                         |
| 204973_at     | 18.10       | GBJ1         | xq13.1         | gap junction protein, beta 1, 32kDa (connexin 32, Charcot-Marie-Tooth neuropathy, X-linked)                                                                                                                                                                                                                                                            |
| 207397_s_at   | 17.21       | HOXD13       | 2q31.1         | homeo box D13                                                                                                                                                                                                                                                                                                                                          |
| 210782_s_at   | 12.69       | DLC1         | 8p22           | deleted in liver cancer 1                                                                                                                                                                                                                                                                                                                              |
| 235158_at     | 12.10       | FLJ14803     | 7q32.3         | hypothetical protein FLJ14803                                                                                                                                                                                                                                                                                                                          |
| 210105_s_at   | 10.23       | FYN          | 6q21           | FYN oncogene related to SRC, FGR, YES                                                                                                                                                                                                                                                                                                                  |
| 216033_s_at   | 7.77        | FYN          | 6q21           | FYN oncogene related to SRC, FGR, YES                                                                                                                                                                                                                                                                                                                  |
| 207398_at     | 7.38        | HOXD13       | 2q31.1         | homeo box D13                                                                                                                                                                                                                                                                                                                                          |
| 215986_x_at   | 6.61        | GK           | xp21.3         | glyceral kinase                                                                                                                                                                                                                                                                                                                                        |
| 219769_at     | 5.73        | LRAP         | 16             | leukocyte-derived arginine aminopeptidase                                                                                                                                                                                                                                                                                                              |
| 202784_s_at   | 5.60        | NNT          | 5p13.1-5cen    | nicotinamide nucleotide transhydrogenase                                                                                                                                                                                                                                                                                                               |
| 212486_s_at   | 5.46        | FYN          | 6q21           | FYN oncogene related to SRC, FGR, YES                                                                                                                                                                                                                                                                                                                  |
| 202783_at     | 5.07        | NNT          | 5p13.1-5cen    | nicotinamide nucleotide transhydrogenase                                                                                                                                                                                                                                                                                                               |
| 235104_at     | 4.99        | LRAP         | 16             | leukocyte-derived arginine aminopeptidase                                                                                                                                                                                                                                                                                                              |
| 221962_s_at   | 4.91        | UBE2H        | 7q32           | ubiquitin-conjugating enzyme E2H (UBC8 homolog, yeast)                                                                                                                                                                                                                                                                                                 |
| 224922_at     | 4.66        | DLC1         | 8p22           | deleted in liver cancer 1                                                                                                                                                                                                                                                                                                                              |
| 230158_at     | 4.01        | FLJ32949     | 12q14.1        | hypothetical protein FLJ32949                                                                                                                                                                                                                                                                                                                          |
| 220494_s_at   | 3.72        | C14orf43     | 14q24.2        |                                                                                                                                                                                                                                                                                                                                                        |
| 203561_at     | 3.61        | FCGR2A       | 1q23           | Fc fragment of IgG, low affinity IIa, receptor for (CD32)                                                                                                                                                                                                                                                                                              |
| 215043_s_at   | 3.41        | LOC153561    | 5q13.2         | Similar to SMA3 protein (LOC391792), mRNA                                                                                                                                                                                                                                                                                                              |
| 222420_s_at   | 3.33        | UBE2H        | 7q32           | ubiquitin-conjugating enzyme E2H (UBC8 homolog, yeast)                                                                                                                                                                                                                                                                                                 |
| 213397_x_at   | 3.23        | RNASE4       | 14q11.1        | ribonuclease, RNase A family, 4                                                                                                                                                                                                                                                                                                                        |
| 211791_s_at   | 3.18        | KCNAB2       | 1p36.3         | potassium voltage-gated channel, shaker-related subfamily, beta member 2                                                                                                                                                                                                                                                                               |
| 219405_at     | 3.07        | RNF137       | 11p15.4        | ring finger protein 137                                                                                                                                                                                                                                                                                                                                |
| 1552519_at    | 2.96        | ACVR1C       | 2q24.2         | activin A receptor, type IC                                                                                                                                                                                                                                                                                                                            |
| 238002_at     | 2.85        | GOLPH4       | 3q26.2         | 602013186F1 NCI_CGAP_Brn64 Homo sapiens cDNA clone IMAGE:4148900 5', mRNA sequence.                                                                                                                                                                                                                                                                    |
| 1554273_a_at  | 2.80        | LRAP         | 16             | leukocyte-derived arginine aminopeptidase                                                                                                                                                                                                                                                                                                              |
| 217759_x_at   | 2.78        | UBE2H        | 7q32           | ubiquitin-conjugating enzyme E2H (UBC8 homolog, yeast)                                                                                                                                                                                                                                                                                                 |
| 1557290_at    | 2.78        |              |                | hypothetical protein FLJ36166                                                                                                                                                                                                                                                                                                                          |
| 215599_at     | 2.67        | SMA4         | 5q13           | SMA3                                                                                                                                                                                                                                                                                                                                                   |
| 65585_at      | 2.65        | MGC16279     | 8p23.1         | CDNA FLJ42457 fs, clone BRACE2018700                                                                                                                                                                                                                                                                                                                   |
| 222267_at     | 2.60        | FLJ14803     | 7q32.3         | 601472975F1 NIH_MGC_68 Homo sapiens cDNA clone IMAGE:3875730 5', mRNA sequence.                                                                                                                                                                                                                                                                        |
| 211514_at     | 2.50        | DuskyPK      | 1q32.1         | dusky protein kinase                                                                                                                                                                                                                                                                                                                                   |
| 211515_s_at   | 2.46        | DuskyPK      | 1q32.1         | dusky protein kinase                                                                                                                                                                                                                                                                                                                                   |
| 238608_at     | 2.39        | MGC2474      | 16p11.2        | hypothetical protein MGC2474                                                                                                                                                                                                                                                                                                                           |
| 201231_s_at   | 2.25        | ENO1         | 1p36.3-p36.2   | enolase 1, (alpha)                                                                                                                                                                                                                                                                                                                                     |
| 226043_at     | 2.22        | GPSM1        | 9q34.3         | G-protein signalling modulator 1 (AGS3-like, C. elegans)                                                                                                                                                                                                                                                                                               |
| 221706_s_at   | 2.21        | MDS032       | 19p13.12       | uncharacterized hematopoietic stem/progenitor cells protein MDS032                                                                                                                                                                                                                                                                                     |
| 238784_at     | 2.19        | FLJ32949     | 12q14.1        | hypothetical protein FLJ32949                                                                                                                                                                                                                                                                                                                          |
| 209535_s_at   | 2.18        | AKAP13       | 15q24-q25      | normal LBC; an alternative 5' translation initiation start site exists upstream of the start site denoted in this sequence; alternatively spliced proto-lbc mRNAs are commonly observed in human skeletal muscle, as well as in other human tissues; Homo sapiens non-ocogenic Rho GTPase-specific GTP exchange factor (proto-LBC) mRNA, complete cds. |
| 202246_s_at   | 2.17        | CDK4         | 12q14          | cyclin-dependent kinase 4                                                                                                                                                                                                                                                                                                                              |
| 208912_s_at   | 2.10        | CNP          | 17q21          | 2',3'-cyclic nucleotide 3' phosphodiesterase                                                                                                                                                                                                                                                                                                           |
| 220353_at     | 2.09        | MGC16279     | 8p23.1         | hypothetical protein FLJ10661                                                                                                                                                                                                                                                                                                                          |
| 202733_at     | 2.04        | PAHA2        | 5q31           | procollagen-proline, 2-oxoglutarate 4-dioxygenase (proline 4-hydroxylase), alpha polypeptide II                                                                                                                                                                                                                                                        |
| 219262_at     | 2.03        | SUV39H2      | 10p13          | suppressor of variegation 3-9 homolog 2 (Drosophila)                                                                                                                                                                                                                                                                                                   |
| 203452_at     | 2.00        | B3GAT3       | 11q12.3        | beta-1,3-glucuronyltransferase 3 (glucuronosyltransferase I)                                                                                                                                                                                                                                                                                           |
| 212242_at     | 1.95        | TUBA1        | 2q36.1         | tubulin, alpha 1 (testis specific)                                                                                                                                                                                                                                                                                                                     |
| 1555630_a_at  | 1.92        | RAB34        | 17q11.2        | RAB34, member RAS oncogene family                                                                                                                                                                                                                                                                                                                      |
| 207614_s_at   | 1.91        | CUL1         | 7q36.1         | culin 1                                                                                                                                                                                                                                                                                                                                                |
| 207608_at     | 1.81        | ATP5F3       | 2q31.2         | ATP synthase, H+ transporting, mitochondrial F0 complex, subunit c (subunit 9) isoform 3                                                                                                                                                                                                                                                               |
| 204578_at     | 1.78        | FGF5L1-qlter | 5q35.1-qlter   | 7-dehydrocholesterol reductase                                                                                                                                                                                                                                                                                                                         |
| 201791_s_at   | 1.78        | DHCR7        | 11q13.2-q13.5  | 7-dehydrocholesterol reductase                                                                                                                                                                                                                                                                                                                         |
| 212131_at     | 1.78        | C19orf13     | 19q13.12       | chromosome 19 open reading frame 13                                                                                                                                                                                                                                                                                                                    |
| 205807_s_at   | 1.78        | TUFT1        | 1q21           | tuftelin 1                                                                                                                                                                                                                                                                                                                                             |
| 212443_at     | 1.78        | KIAA0540     | 3p21.31        | KIAA0540 protein                                                                                                                                                                                                                                                                                                                                       |
| 210538_s_at   | 1.78        | BIRC3        | 11q22          | IAP homolog C; interacts with TRAF1 and TRAF2 in yeast two hybrid system; homolog of Baculovirus IAP genes; Mammalian IAP homolog C; Human IAP homolog C (MIHC) mRNA, complete cds.                                                                                                                                                                    |
| 218292_s_at   | 1.78        | PRKAG2       | 7q35-q36       | protein kinase, AMP-activated, gamma 2 non-catalytic subunit                                                                                                                                                                                                                                                                                           |
| 224212_s_at   | 1.78        | PCDH6G       | 5q31           | protocadherin alpha 5                                                                                                                                                                                                                                                                                                                                  |
| 208373_s_at   | 1.78        | P2RY6        | 11q13.5        | pyrimidergic receptor P2Y, G-protein coupled, 6                                                                                                                                                                                                                                                                                                        |
| 204532_x_at   | 1.78        | UGT1A6       | 2q37           | UDP glycosyltransferase 1 family, polypeptide A10                                                                                                                                                                                                                                                                                                      |
| 202712_s_at   | 1.78        | CKMT1        | 15q15          | creatine kinase, mitochondrial 1 (ubiquitous)                                                                                                                                                                                                                                                                                                          |
| 216470_x_at   | 1.78        | FRS3         | 9p11.2         |                                                                                                                                                                                                                                                                                                                                                        |
| 232422_at     | 1.78        | LOC37859     | 13q32.3        | hypothetical protein BC004360                                                                                                                                                                                                                                                                                                                          |
| 1555420_a_at  | 1.78        | KLF7         | 2q32           | Kruppel-like factor 7 (ubiquitous)                                                                                                                                                                                                                                                                                                                     |
| 204589_at     | 1.78        | ARK5         | 12q24.11       |                                                                                                                                                                                                                                                                                                                                                        |
| 1555105_a_at  | 1.78        | MI-ER1       | 1p31.3         | mesoderm induction early response 1                                                                                                                                                                                                                                                                                                                    |
| 208998_at     | 1.78        | UCP2         | 11q13          | uncoupling protein 2 (mitochondrial, proton carrier)                                                                                                                                                                                                                                                                                                   |
| 204686_at     | 1.78        | IRS1         | 2q36           | insulin receptor substrate 1                                                                                                                                                                                                                                                                                                                           |
| 233749_x_at   | 1.78        | PRKAG2       | 7q35-q36       | protein kinase, AMP-activated, gamma 2 non-catalytic subunit                                                                                                                                                                                                                                                                                           |
| 203615_x_at   | 1.78        | SULT1A1      | 16p12.1        | sulfotransferase family, cytosolic, 1A, phenol-preferring, member 1                                                                                                                                                                                                                                                                                    |
| 220144_s_at   | 1.78        | ANKRD5       | 20pter-q11.23  | ankyrin repeat domain 5                                                                                                                                                                                                                                                                                                                                |
| 207722_s_at   | 1.78        | BTBD2        | 19p13.3        | BTB (POZ) domain containing 2                                                                                                                                                                                                                                                                                                                          |
| 212657_s_at   | 1.78        | IL1RN        | 2q14.2         |                                                                                                                                                                                                                                                                                                                                                        |
| 225165_at     | 1.78        | PPP1R1B      | 17q21.2        | protein phosphatase 1, regulatory (inhibitor) subunit 1B (dopamine and cAMP regulated phosphoprotein, DARPP-32)                                                                                                                                                                                                                                        |
| 218170_at     | 1.78        | CG21-c3q3.3  | 5q22.1-q33.3   | CG111111                                                                                                                                                                                                                                                                                                                                               |
| 205632_s_at   | 1.78        | PIPK5B       | 9q13           | phosphatidylinositol-4-phosphate 5-kinase, type I, beta                                                                                                                                                                                                                                                                                                |
| 214733_s_at   | 1.78        | DJ167A19.1   | 1p33-p32.1     | Human DNA sequence from clone RP1-167A19 on chromosome 1p32.1-33, complete sequence.                                                                                                                                                                                                                                                                   |
| 1553611_s_at  | 1.78        | FLJ33790     | 11q13.3        | hypothetical protein FLJ33790                                                                                                                                                                                                                                                                                                                          |
| 229404_at     | 1.78        | TWIST2       | 2q37.3         | twist homolog 2 (Drosophila)                                                                                                                                                                                                                                                                                                                           |
| 209459_s_at   | 1.78        | ABAT         | 16p13.2        | 4-aminobutyrate aminotransferase                                                                                                                                                                                                                                                                                                                       |
| 239853_at     | 1.78        | KLHL2L       | 19q13          | kinesin light chain 2-like                                                                                                                                                                                                                                                                                                                             |
| 213526_s_at   | 1.78        | FZ5685       | 19q13.1        | pressurin enhancer 2                                                                                                                                                                                                                                                                                                                                   |
| 204517_at     | 1.78        | PPIC         | 5q23.2         | 601656143R1 NIH_MGC_66 Homo sapiens cDNA clone IMAGE:3855754 3', mRNA sequence.                                                                                                                                                                                                                                                                        |
| 211975_at     | 1.78        | ZNF289       | 11p11.2-p11.12 | 600944342T1 NIH_MGC_17 Homo sapiens cDNA clone IMAGE:2960218 3', mRNA sequence.                                                                                                                                                                                                                                                                        |
| 203317_at     | 1.78        | TIC          | 2q13           | SEC7 homolog                                                                                                                                                                                                                                                                                                                                           |
| 208997_s_at   | 1.78        | UCP2         | 11q13          | uncoupling protein 2 (mitochondrial, proton carrier)                                                                                                                                                                                                                                                                                                   |
| 218644_at     | 1.78        | PLEK2        | 14q24.1        | pleckstrin 2                                                                                                                                                                                                                                                                                                                                           |
| 204852_s_at   | 1.78        | NME3         | 16q13          | non-metastatic cells 3, protein expressed in                                                                                                                                                                                                                                                                                                           |
| 223411_at     | 1.78        | AD023        | 17q25.2        | Homo sapiens AD023 mRNA, complete cds.                                                                                                                                                                                                                                                                                                                 |
| 206094_x_at   | 1.78        | UGT1A6       | 2q37           | UDP glycosyltransferase 1 family, polypeptide A10                                                                                                                                                                                                                                                                                                      |
| 203620_s_at   | 1.78        | FCHSD2       | 11q13.3        |                                                                                                                                                                                                                                                                                                                                                        |
| 39650_s_at    | 1.78        | FLJ11383     | 14q22.2        | hypothetical protein FLJ11383                                                                                                                                                                                                                                                                                                                          |
| 34726_at      | 1.78        | CACNB3       | 12q13          | calcium channel, voltage-dependent, beta 3 subunit                                                                                                                                                                                                                                                                                                     |
| 222810_s_at   | 1.78        | RASAL2       | 1q24           | RAS protein activator like 2                                                                                                                                                                                                                                                                                                                           |
| 202365_at     | 1.78        | MGC5139      | 12q24.31       | acyl-Coenzyme A dehydrogenase, C-2 to C-3 short chain                                                                                                                                                                                                                                                                                                  |
| 46256_at      | 1.78        | SSB3         | 16p13.3        | ni39a05.s1 NCI_CGAP_Lu1 Homo sapiens cDNA clone IMAGE:979184 3', mRNA sequence.                                                                                                                                                                                                                                                                        |
| 32402_s_at    | 1.78        | SYMPK        | 19q13.3        | sympkin                                                                                                                                                                                                                                                                                                                                                |
| 209125_at     | 1.78        | KRT6A        | 12q12-q13      | unnamed protein product; keratin; Human messenger fragment encoding cytoskeletal keratin (type II), mRNA from cultured epidermal cells from human foreskin.                                                                                                                                                                                            |
| 230120_s_at   | 1.78        | PLGL         | 2p11-q11       | Transcribed sequences                                                                                                                                                                                                                                                                                                                                  |
| 233550_s_at   | 1.78        | SLC44A11     | 20p12          |                                                                                                                                                                                                                                                                                                                                                        |
| 226408_at     | 1.78        | TEAD2        | 19q13.3        | CD37 antigen                                                                                                                                                                                                                                                                                                                                           |
| 223948_s_at   | 1.78        | TMPPRSS3     | 21q22.3        | transmembrane protease, serine 3                                                                                                                                                                                                                                                                                                                       |
| 211237_s_at   | 1.78        | FGFR4        | 5q35.1-qlter   | fibroblast growth factor receptor 4                                                                                                                                                                                                                                                                                                                    |
| 215084_s_at   | 1.78        | MGC8974      | 1p33-p32.1     | Human DNA sequence from clone RP1-167A19 on chromosome 1p32.1-33, complete sequence.                                                                                                                                                                                                                                                                   |
| 208009_s_at   | 1.78        | ARHGAP16     | 1p36.3         | Rho guanine exchange factor (GEF) 16                                                                                                                                                                                                                                                                                                                   |
| 202357_s_at   | 1.78        | BF           | 6p21.3         | B-factor, properdin                                                                                                                                                                                                                                                                                                                                    |
| 204334_at     | 1.78        | KLF7         | 2q32           | Kruppel-like factor 7 (ubiquitous)                                                                                                                                                                                                                                                                                                                     |
| 214580_x_at   | 1.78        | KRT6A        | 12q12-q13      | keratin 6A                                                                                                                                                                                                                                                                                                                                             |
| 223628_at     | 1.78        | DKFZp434N035 | 22q11.21       | hypothetical protein DKFZp434N035                                                                                                                                                                                                                                                                                                                      |
| 223665_at     | 1.78        | ARPM1        | 3q26.31        | actin related protein M1                                                                                                                                                                                                                                                                                                                               |
| 1555935_s_at  | 1.78        | HUNK         | 21q22.1        | homonally upregulated Neu-associated kinase                                                                                                                                                                                                                                                                                                            |
| 219076_s_at   | 1.78        | PXMP2        | 12q24.33       | peroxisomal membrane protein 2, 22kDa                                                                                                                                                                                                                                                                                                                  |
| 218166_s_at   | 1.78        | HDXAP        | 11q13.4        | hepatitis B virus x associated protein                                                                                                                                                                                                                                                                                                                 |
| 243256_at     | 1.78        | MKNK1        | 1p34.1         | Transcribed sequence with weak similarity to protein ref.NP_060265.1 (H.sapiens) hypothetical protein FLJ20378 [Homo sapiens]                                                                                                                                                                                                                          |
| 223500_at     | 1.78        | CPLX1        | 4p16.3         | complexin 1                                                                                                                                                                                                                                                                                                                                            |
| 206516_at     | 1.78        | AMH          | 19p13.3        | anti-Mullerian hormone                                                                                                                                                                                                                                                                                                                                 |
| 239730_at     | 1.78        | PTD015       | 11q13.4        | Full length insert cDNA clone ZD87H06                                                                                                                                                                                                                                                                                                                  |
| 221599_at     | 1.78        | SCRIB        | 8q24.3         | PTD015 protein                                                                                                                                                                                                                                                                                                                                         |
| 212556_at     | 1.78        | SCRIB        | 8q24.3         | scribble                                                                                                                                                                                                                                                                                                                                               |

|              |       |          |               |                                                              |
|--------------|-------|----------|---------------|--------------------------------------------------------------|
| 213540_at    | #REF! | HSD17B8  | 6p21.3        |                                                              |
| 1552319_a_at | #REF! | KLK8     | 19q13.3-q13.4 | kallikrein 8 (neuropsin/ovasin)                              |
| 225898_at    | #REF! | FLJ12953 | 2p13.1        | hypothetical protein FLJ12953 similar to Mus musculus D3Mm3e |
| 222640_at    | #REF! | DNMT3A   | 2p23          | DNA (cytosine-5-)-methyltransferase 3 alpha                  |
| 207517_at    | #REF! | LAMC2    | 1q25-q31      | laminin, gamma 2                                             |
| 227759_at    | #REF! | PCSK9    | 1p32.3        | proprotein convertase subtilisin/kexin type 9                |
| 1557128_at   | #REF! | CANP     | 11q12.2       | cancer-associated nucleoprotein                              |
| 209110_s_at  | #REF! | RAB2L    | 6p21.3        | RAB2, member RAS oncogene family-like                        |
| 205871_at    | #REF! | PLGL     | 2p11-q11      | plasminogen-like                                             |
| 229312_s_at  | #REF! | GKAP1    | 9q22.1        | protein kinase anchoring protein GKAP42                      |
| 219749_at    | #REF! | SH2D4A   | 8p21.2        | hypothetical protein FLJ20967                                |
| 210070_s_at  | #REF! | CPT1B    | 22q13.33      | carntine palmitoyltransferase 1B (muscle)                    |
| 202267_at    | #REF! | LAMC2    | 1q25-q31      | laminin, gamma 2                                             |
