# Supplementary material for: Multi-Platform Whole-Genome Microarray Analyses Refine the Epigenetic Signature of Breast Cancer Metastasis with Gene Expression and Copy Number
Source: PubMed Central journal article supplement (PMC2801616; doi:10.1371/journal.pone.0008665), 2010-01-13
Supplement: pone.0008665.s010.pdf [file pone.0008665.s010.pdf]

**Supplemental Table 9: Genes Hypomethylated AND Increased in expression, gain in copy number (Venn region 4)**

| Probe ID     | 468GFP-LN/468GFP<br>fold increase | Common    | Description                                                                                                                         |
|--------------|-----------------------------------|-----------|-------------------------------------------------------------------------------------------------------------------------------------|
| 203603_s_at  | 615.83                            | ZFHX1B    | zinc finger homeobox 1b                                                                                                             |
| 209170_s_at  | 595.83                            | GPM6B     | Homo sapiens m6b1 mRNA, complete cds.                                                                                               |
| 206070_s_at  | 471.97                            | EPHA3     | EphA3                                                                                                                               |
| 209167_at    | 270.99                            | GPM6B     | glycoprotein M6B                                                                                                                    |
| 208986_at    | 257.20                            | TCF12     | transcription factor 12 (HTF4, helix-loop-helix transcription factors 4)                                                            |
| 213139_at    | 207.57                            | SNAI2     | snail homolog 2 (Drosophila)                                                                                                        |
| 206696_at    | 182.45                            | GPR143    | G protein-coupled receptor 143                                                                                                      |
| 218474_s_at  | 181.35                            | KCTD5     | potassium channel tetramerisation domain containing 5                                                                               |
| 209392_at    | 148.48                            | ENPP2     | ectonucleotide pyrophosphatase/phosphodiesterase 2 (autotaxin)                                                                      |
| 218839_at    | 82.58                             | HEY1      | hairly/enhancer-of-split related with YRPW motif 1                                                                                  |
| 206071_s_at  | 77.99                             | EPHA3     | EphA3                                                                                                                               |
| 225945_at    | 76.33                             | VIK       | vav-1 interacting Kruppel-like protein                                                                                              |
| 209169_at    | 74.17                             | GPM6B     | glycoprotein M6B                                                                                                                    |
| 207253_s_at  | 62.87                             | UBN1      | ubiquitin 1                                                                                                                         |
| 1554726_at   | 50.22                             | VIK       | vav-1 interacting Kruppel-like protein                                                                                              |
| 207808_s_at  | 42.96                             | PROS1     | protein S (alpha)                                                                                                                   |
| 202527_s_at  | 40.09                             | SMAD4     | MAD, mothers against decapentaplegic homolog 4 (Drosophila)                                                                         |
| 214971_s_at  | 37.61                             | SIAT1     | sialyltransferase 1 (beta-galactoside alpha-2,6-sialyltransferase)                                                                  |
| 223723_at    | 37.47                             | MI2       | antigen p97 (melanoma associated) identified by monoclonal antibodies 133.2 and 96.5                                                |
| 220425_x_at  | 35.48                             | ROPN1     | ropporin, rhophilin associated protein 1                                                                                            |
| 210078_s_at  | 33.26                             | KCNAB1    | potassium voltage-gated channel, shaker-related subfamily, beta member 1                                                            |
| 210839_s_at  | 30.09                             | ENPP2     | ectonucleotide pyrophosphatase/phosphodiesterase 2 (autotaxin)                                                                      |
| 1555527_at   | 26.55                             | COL9A1    | collagen, type IX, alpha 1                                                                                                          |
| 210619_s_at  | 25.54                             | HYAL1     | hyaluronoglucosaminidase 1                                                                                                          |
| 204860_s_at  | 24.90                             | BIRC1     | Transcribed sequence with strong similarity to protein sp:Q13075 (H.sapiens) BIR1_HUMAN Baculoviral IAP repeat-containing protein 1 |
| 208454_s_at  | 23.58                             | PGCP      | plasma glutamate carboxypeptidase                                                                                                   |
| 224477_s_at  | 22.53                             | SDOS      | hypothetical protein MGC11275                                                                                                       |
| 212576_at    | 22.39                             | MGRN1     | mahogunin, ring finger 1                                                                                                            |
| 206522_at    | 21.64                             | MGAM      | maltase-glucoamylase (alpha-glucosidase)                                                                                            |
| 221772_s_at  | 21.03                             | PPP2R2D   | protein phosphatase 2, regulatory subunit B, delta isoform                                                                          |
| 235359_at    | 20.99                             | UNQ3030   | ELL3030                                                                                                                             |
| 213355_at    | 20.75                             | SIAT10    | sialyltransferase 10 (alpha-2,3-sialyltransferase VI)                                                                               |
| 229947_at    | 20.75                             |           | CDNA FLJ26876 fis, clone PRS09003                                                                                                   |
| 209168_at    | 20.65                             | GPM6B     | glycoprotein M6B                                                                                                                    |
| 210942_s_at  | 19.26                             | SIAT10    | sialyltransferase 10 (alpha-2,3-sialyltransferase VI)                                                                               |
| 203348_s_at  | 19.19                             | ETV5      | ets variant gene 5 (ets-related molecule)                                                                                           |
| 222008_at    | 18.51                             | COL9A1    | collagen, type IX, alpha 1                                                                                                          |
| 235238_at    | 18.28                             | RaLP      | 602086260F1 NIH_MGC_83 Homo sapiens cDNA clone IMAGE:4250534 5', mRNA sequence.                                                     |
| 227007_at    | 16.79                             | LOC255104 | hypothetical protein LOC255104                                                                                                      |
| 216375_s_at  | 15.94                             | ETV5      | ets variant gene 5 (ets-related molecule)                                                                                           |
| 1560292_a_at | 15.93                             | LOC255104 | hypothetical protein LOC255104                                                                                                      |
| 205227_s_at  | 15.46                             | IL1RAP    | interleukin 1 receptor accessory protein                                                                                            |
| 223302_s_at  | 15.38                             | VIK       | vav-1 interacting Kruppel-like protein                                                                                              |
| 226066_at    | 14.52                             | MITF      | microphthalmia-associated transcription factor                                                                                      |
| 210471_s_at  | 14.26                             | KCNAB1    | potassium voltage-gated channel, shaker-related subfamily, beta member 1                                                            |
| 225874_at    | 14.07                             | LOC124402 | 60129761F1 NIH_MGC_19 Homo sapiens cDNA clone IMAGE:3627891 5', mRNA sequence.                                                      |
| 221628_s_at  | 13.71                             | N-PAC     | cytokine-like nuclear factor n-pac                                                                                                  |
| 44783_s_at   | 13.30                             | HEY1      | hairly/enhancer-of-split related with YRPW motif 1                                                                                  |
| 220167_s_at  | 12.46                             | TP53TG3   | TP53TG3 protein                                                                                                                     |
| 200756_x_at  | 12.41                             | CALU      | calumenin                                                                                                                           |
| 222153_at    | 12.32                             | MYEF2     | myelin expression factor 2                                                                                                          |
| 205439_at    | 12.23                             | GSTT2     | glutathione S-transferase theta 2                                                                                                   |
| 204469_at    | 11.49                             | PTPRZ1    | protein tyrosine phosphatase, receptor-type, Z polypeptide 1                                                                        |
| 238418_at    | 11.24                             | SLC35B4   | solute carrier family 35, member B4                                                                                                 |
| 209515_s_at  | 11.23                             | RAB27A    | RAB27A, member RAS oncogene family                                                                                                  |
| 209514_s_at  | 11.21                             | RAB27A    | RAB27A, member RAS oncogene family                                                                                                  |
| 211737_x_at  | 11.19                             | PTN       | pleiotrophin (heparin binding growth factor 8, neurite growth-promoting factor 1)                                                   |
| 207233_s_at  | 11.18                             | MITF      | microphthalmia-associated transcription factor                                                                                      |
| 214845_s_at  | 10.94                             | CALU      | calumenin                                                                                                                           |
| 210233_at    | 10.88                             | IL1RAP    | interleukin 1 receptor accessory protein                                                                                            |
| 240770_at    | 10.72                             | LOC134285 | hypothetical protein LOC134285                                                                                                      |
| 210951_x_at  | 10.68                             | RAB27A    | RAB27A, member RAS oncogene family                                                                                                  |
| 210852_s_at  | 10.57                             | AASS      | aminoadipate-semialdehyde synthase                                                                                                  |
| 203349_s_at  | 10.39                             | ETV5      | ets variant gene 5 (ets-related molecule)                                                                                           |
| 222652_s_at  | 9.89                              | N-PAC     | cytokine-like nuclear factor n-pac                                                                                                  |
| 205383_s_at  | 9.85                              | ZNF288    | zinc finger protein 288                                                                                                             |
| 212730_at    | 9.62                              | DMN       | desmuslin                                                                                                                           |
| 221643_s_at  | 9.48                              | RERE      | arginine-glutamic acid dipeptide (RE) repeats                                                                                       |
| 237215_s_at  | 9.28                              | TFRC      | transferrin receptor (p90, CD71)                                                                                                    |
| 222851_at    | 9.15                              | FLJ10997  | DKFZp761B158_r1 761 (synonym: hamy2) Homo sapiens cDNA clone DKFZp761B158 5', mRNA sequence.                                        |
| 208670_s_at  | 8.97                              | CR1I      | CREBBP/EP300 inhibitory protein 1                                                                                                   |
| 209465_x_at  | 8.83                              | PTN       | pleiotrophin (heparin binding growth factor 8, neurite growth-promoting factor 1)                                                   |
| 1554874_at   | 8.51                              | MITF      | synonym: WS2A; Homo sapiens microphthalmia-associated transcription factor, mRNA (cDNA clone IMAGE:4708731), complete cds.          |
| 222645_s_at  | 8.30                              | KCTD5     | potassium channel tetramerisation domain containing 5                                                                               |
| 204105_s_at  | 7.94                              | NRCAM     | neuronal cell adhesion molecule                                                                                                     |
| 201337_s_at  | 7.61                              | VAMP3     | vesicle-associated membrane protein 3 (cellubrevin)                                                                                 |
| 219280_s_at  | 7.19                              | DERP6     | S-phase 2 protein                                                                                                                   |
| 203501_at    | 7.11                              | PGCP      | aminopeptidase; go_component: extracellular space [goid 0005615] [evidence E] [pmid 10206990]; go_component:                        |
| 225881_at    | 7.06                              | SLC35B4   | AL513639 Homo sapiens NEUROBLASTOMA Homo sapiens cDNA clone XCL0BB0012F12 3-PRIME, mRNA sequence.                                   |
| 223865_at    | 7.04                              | SOX6      | SRY (sex determining region Y)-box 6                                                                                                |
| 1554717_a_at | 6.82                              | PDE4D     | phosphodiesterase 4D, cAMP-specific (phosphodiesterase E3 dunce homolog, Drosophila)                                                |
| 215728_s_at  | 6.67                              | BACH      |                                                                                                                                     |
| 226084_at    | 6.50                              | MAP1B     | microtubule-associated protein 1B                                                                                                   |
| 200755_s_at  | 6.17                              | CALU      | calumenin                                                                                                                           |
| 208669_s_at  | 6.02                              | CR1I      | CREBBP/EP300 inhibitory protein 1                                                                                                   |
| 216316_x_at  | 5.47                              | GK        | H.sapiens glycerol kinase pseudogene, chromosome 1.                                                                                 |
| 219815_at    | 5.38                              | GAL3ST4   | beta-galactose-3-O-sulfotransferase, 4                                                                                              |
| 240528_s_at  | 5.32                              | SEC8L1    | SEC8-like 1 (S. cerevisiae)                                                                                                         |
| 200939_s_at  | 5.30                              | RERE      | arginine-glutamic acid dipeptide (RE) repeats                                                                                       |
| 208213_s_at  | 5.25                              | KCNAB1    | potassium voltage-gated channel, shaker-related subfamily, beta member 1                                                            |
| 210647_x_at  | 5.23                              | PLA2G6    | phospholipase A2, group VI (cytosolic, calcium-independent)                                                                         |
| 225484_at    | 5.03                              | TSGA14    | testis specific, 14                                                                                                                 |
| 208002_s_at  | 4.97                              | BACH      | brain acyl-CoA hydrolase                                                                                                            |
| 200757_s_at  | 4.71                              | CALU      | calumenin                                                                                                                           |
| 202545_at    | 4.69                              | PRKCD     | protein kinase C, delta                                                                                                             |

|              |      |              |                                                                                                                          |
|--------------|------|--------------|--------------------------------------------------------------------------------------------------------------------------|
| 211749_s_at  | 4.45 | VAMP3        | vesicle-associated membrane protein 3 (cellubrevin)                                                                      |
| 201998_at    | 4.45 | SIAT1        | sialyltransferase 1 (beta-galactoside alpha-2,6-sialyltransferase)                                                       |
| 217437_s_at  | 4.42 | TACC1        | transforming, acidic coiled-coil containing protein 1                                                                    |
| 202139_at    | 4.39 | AKR7A2       | aldo-keto reductase family 7, member A2 (afatoxin aldehyde reductase)                                                    |
| 1558249_s_at | 4.39 | STX16        | syntaxin 16                                                                                                              |
| 223163_s_at  | 4.33 | NIPA         | nuclear interacting partner of anaplastic lymphoma kinase (ALK)                                                          |
| 223107_s_at  | 4.33 | PS1D         | putative S1 RNA binding domain protein                                                                                   |
| 215723_s_at  | 4.30 | PLD1         | phospholipase D1, phosphatidylcholine-specific                                                                           |
| 204691_x_at  | 4.29 | PLA2G6       | phospholipase A2, group VI (cytosolic, calcium-independent)                                                              |
| 202536_at    | 4.27 | DKFZP564O123 | DKFZP564O123 protein                                                                                                     |
| 217960_s_at  | 4.20 | TOMM22       | chromosome 22 open reading frame 2                                                                                       |
| 219703_at    | 4.18 | MNS1         | meiosis-specific nuclear structural protein 1                                                                            |
| 229061_s_at  | 4.17 | SLC25A13     | solute carrier family 25, member 13 (citrin)                                                                             |
| 202570_s_at  | 4.11 | DLGAP4       | disks large-associated protein 4                                                                                         |
| 207541_s_at  | 4.09 | PMSCL2       | polymyositis/scleroderma autoantigen 2, 100kDa                                                                           |
| 216205_s_at  | 4.08 | MFN2         | mitofusin 2                                                                                                              |
| 215938_s_at  | 4.06 | PLA2G6       | phospholipase A2, group VI (cytosolic, calcium-independent)                                                              |
| 218981_at    | 4.04 | ACN9         | ACN9 homolog (S. cerevisiae)                                                                                             |
| 1554449_at   | 3.96 | FLJ35954     | hypothetical protein FLJ35954                                                                                            |
| 221935_s_at  | 3.96 | MGC34132     | unnamed protein product; Homo sapiens cDNA FLJ13078 fis, clone NT2RP3002002.                                             |
| 219033_at    | 3.90 | FLJ21308     | hypothetical protein FLJ21308                                                                                            |
| 211698_at    | 3.83 | CR1I         | CREBBP/EP300 inhibitory protein 1                                                                                        |
| 1554690_a_at | 3.82 | TACC1        | transforming, acidic coiled-coil containing protein 1                                                                    |
| 206907_at    | 3.82 | TNFSF9       | tumor necrosis factor (ligand) superfamily, member 9                                                                     |
| 202675_at    | 3.82 | SDHB         | succinate dehydrogenase complex, subunit B, iron sulfur (lp)                                                             |
| 200973_s_at  | 3.79 | TM4SF8       | transmembrane 4 superfamily member 8                                                                                     |
| 205084_at    | 3.76 | BCAP29       | B-cell receptor-associated protein 29                                                                                    |
| 211599_x_at  | 3.76 | MET          | Human (tpv-met fusion) oncogene mRNA, complete cds.                                                                      |
| 221986_s_at  | 3.75 | DRE1         | DRE1 protein                                                                                                             |
| 233803_s_at  | 3.74 | MYBBP1A      | MYB binding protein (P160) 1a                                                                                            |
| 213807_x_at  | 3.74 | MET          | met proto-oncogene (hepatocyte growth factor receptor)                                                                   |
| 212459_x_at  | 3.66 | SUCLG2       | succinate-CoA ligase, GDP-forming, beta subunit                                                                          |
| 223220_s_at  | 3.65 | BAL          | B aggressive lymphoma gene                                                                                               |
| 222206_s_at  | 3.65 | LOC56926     | hypothetical protein from EUROIMAGE 2021883                                                                              |
| 225331_at    | 3.63 | C3orf6       | chromosome 3 open reading frame 6                                                                                        |
| 215772_x_at  | 3.62 | SUCLG2       | succinate-CoA ligase, GDP-forming, beta subunit                                                                          |
| 221638_s_at  | 3.62 | STX16        | syntaxin 16                                                                                                              |
| 225882_at    | 3.61 | SLC35B4      | solute carrier family 35, member B4                                                                                      |
| 63825_at     | 3.59 | ABHD2        | abhydrolase domain containing 2                                                                                          |
| 217118_s_at  | 3.58 | KIAA0930     | KIAA0930 protein                                                                                                         |
| 218501_at    | 3.57 | ARHGEF3      | Rho guanine nucleotide exchange factor (GEF) 3                                                                           |
| 209147_s_at  | 3.55 | PPAP2A       | phosphatidic acid phosphatase type 2A                                                                                    |
| 221815_at    | 3.54 | ABHD2        | 7a47d01.x1 NCI_CGAP_GC6 Homo sapiens cDNA clone IMAGE:3221857 3' similar to gb:X12433 PROTEIN PHPS1-2 (HUMAN);, mRNA seq |
| 225485_at    | 3.52 | TSGA14       | testis specific, 14                                                                                                      |
| 209737_at    | 3.52 | AIP1         | atrophin-1 interacting protein 1                                                                                         |
| 220444_at    | 3.52 | ZNF557       | zinc finger protein 557                                                                                                  |
| 228759_at    | 3.49 | CREB3L2      | cAMP responsive element binding protein 3-like 2                                                                         |
| 205356_at    | 3.46 | USP13        | ubiquitin specific protease 13 (isopeptidase T-3)                                                                        |
| 234726_s_at  | 3.43 | FLJ13576     | hypothetical protein FLJ13576                                                                                            |
| 208503_s_at  | 3.40 | ODAG         | ocular development-associated gene                                                                                       |
| 204369_at    | 3.40 | PIK3CA       | phosphoinositide-3-kinase, catalytic, alpha polypeptide                                                                  |
| 221985_at    | 3.39 | DRE1         | DRE1 protein                                                                                                             |
| 226980_at    | 3.37 | XTP1         | HBxAg transactivated protein 1                                                                                           |
| 225677_at    | 3.35 | BCAP29       | B-cell receptor-associated protein 29                                                                                    |
| 238465_at    | 3.34 | MGC33648     | qq90e10.x1 Soares_total_fetus_Nb2HF8_9w Homo sapiens cDNA clone IMAGE:1938666 3', mRNA sequence.                         |
| 225339_s_at  | 3.33 | SERF1A       | small EDRK-rich factor 1A (telomeric)                                                                                    |
| 205071_x_at  | 3.32 | XRCC4        | X-ray repair complementing defective repair in Chinese hamster cells 4                                                   |
| 223519_at    | 3.27 | DFFA         | DNA fragmentation factor, 45kDa, alpha polypeptide                                                                       |
| 63009_at     | 3.19 | FLJ10539     | hypothetical protein FLJ10539                                                                                            |
| 212345_s_at  | 3.14 | CREB3L2      | cAMP responsive element binding protein 3-like 2                                                                         |
| 202566_s_at  | 3.12 | SVIL         | supervillin                                                                                                              |
| 225674_at    | 3.11 | BCAP29       | B-cell receptor-associated protein 29                                                                                    |
| 222678_s_at  | 3.10 | RP42         | RP42 homolog                                                                                                             |
| 204324_s_at  | 3.06 | GOLPH4       | golgi phosphoprotein 4                                                                                                   |
| 219083_at    | 3.06 | FLJ10539     | hypothetical protein FLJ10539                                                                                            |
| 213018_at    | 3.05 | ODAG         | ocular development-associated gene                                                                                       |
| 217043_s_at  | 3.03 | MFN1         | mitofusin 1                                                                                                              |
| 224790_at    | 3.02 | DDEF1        | development and differentiation enhancing factor 1                                                                       |
| 202538_s_at  | 3.01 | DKFZP564O123 | DKFZP564O123 protein                                                                                                     |
| 201439_at    | 3.01 | GBF1         | golgi-specific brefeldin A resistance factor 1                                                                           |
| 1554465_s_at | 2.99 | FLJ20344     | hypothetical protein FLJ20344                                                                                            |
| 212178_s_at  | 2.99 | POM121       | POM121 membrane glycoprotein (rat)                                                                                       |
| 223457_at    | 2.96 | COPG2        | coatamer protein complex, subunit gamma 2                                                                                |
| 209414_at    | 2.96 | FZR1         | Fzr1 protein                                                                                                             |
| 202929_s_at  | 2.93 | DDT          | D-dopachrome tautomerase                                                                                                 |
| 222841_s_at  | 2.91 | TIMM22       | translocase of inner mitochondrial membrane 22 homolog (yeast)                                                           |
| 234926_s_at  | 2.91 | C20orf43     | chromosome 20 open reading frame 43                                                                                      |
| 217737_x_at  | 2.91 | C20orf43     | chromosome 20 open reading frame 43                                                                                      |
| 201521_s_at  | 2.90 | NCBP2        | nuclear cap binding protein subunit 2, 20kDa                                                                             |
| 208727_s_at  | 2.87 | CDC42        | cell division cycle 42 (GTP binding protein, 25kDa)                                                                      |
| 206918_s_at  | 2.87 | CPNE1        | copine 1                                                                                                                 |
| 214531_s_at  | 2.86 | SNX1         | sorting nexin 1                                                                                                          |
| 208674_x_at  | 2.85 | DDOST        | dolichyl-diphosphooligosaccharide-protein glycosyltransferase                                                            |
| 211595_s_at  | 2.85 | MRPS11       | mitochondrial ribosomal protein S11                                                                                      |
| 217915_s_at  | 2.85 | C15orf15     | chromosome 15 open reading frame 15                                                                                      |
| 1553750_a_at | 2.84 | MGC33371     | hypothetical protein MGC33371                                                                                            |
| 214835_s_at  | 2.82 | SUCLG2       | succinate-CoA ligase, GDP-forming, beta subunit                                                                          |
| 233842_x_at  | 2.81 | C20orf43     | chromosome 20 open reading frame 43                                                                                      |
| 200940_s_at  | 2.80 | RERE         | arginine-glutamic acid dipeptide (RE) repeats                                                                            |
| 214259_s_at  | 2.80 | AKR7A2       | aldo-keto reductase family 7, member A2 (afatoxin aldehyde reductase)                                                    |
| 201752_s_at  | 2.79 | ADD3         | adducin 3 (gamma)                                                                                                        |
| 205748_s_at  | 2.78 | RNF126       | ring finger protein 126                                                                                                  |
| 222572_at    | 2.78 | PPM2C        | protein phosphatase 2C, magnesium-dependent, catalytic subunit                                                           |
| 201716_at    | 2.77 | SNX1         | sorting nexin 1                                                                                                          |
| 200911_s_at  | 2.73 | TACC1        | transforming, acidic coiled-coil containing protein 1                                                                    |
| 211801_x_at  | 2.73 | MFN1         | mitofusin 1                                                                                                              |
| 208728_s_at  | 2.73 | CDC42        | cell division cycle 42 (GTP binding protein, 25kDa)                                                                      |
| 226087_at    | 2.72 | LZIC         | leucine zipper and CTNNBIP1 domain containing                                                                            |
| 220688_s_at  | 2.72 | C1orf33      | chromosome 1 open reading frame 33                                                                                       |
| 213816_s_at  | 2.71 | MET          | met proto-oncogene (hepatocyte growth factor receptor)                                                                   |
| 232048_at    | 2.70 | MGC33371     | hypothetical protein MGC33371                                                                                            |
| 208675_s_at  | 2.67 | DDOST        | dolichyl-diphosphooligosaccharide-protein glycosyltransferase                                                            |
| 223108_s_at  | 2.65 | PS1D         | putative S1 RNA binding domain protein                                                                                   |

|              |      |               |                                                                                                                                          |
|--------------|------|---------------|------------------------------------------------------------------------------------------------------------------------------------------|
| 208677_s_at  | 2.62 | BSG           | basigin (OK blood group)                                                                                                                 |
| 223286_at    | 2.62 | DERP6         | S-phase 2 protein                                                                                                                        |
| 202537_s_at  | 2.61 | DKFZP564O123  | DKFZP564O123 protein                                                                                                                     |
| 207098_s_at  | 2.61 | MFN1          | mitofusin 1                                                                                                                              |
| 204172_at    | 2.60 | CPOX          | coproporphyrinogen oxidase                                                                                                               |
| 238609_at    | 2.59 |               | ya86b01.r1 Stratagene fetal spleen (#937205) Homo sapiens cDNA clone IMAGE:68521 5' similar to contains Alu repetitive element, mRNA seq |
| 209350_s_at  | 2.59 | GPS2          | G protein pathway suppressor 2                                                                                                           |
| 223538_at    | 2.58 | SERF1A        | small EDRK-rich factor 1A (telomeric)                                                                                                    |
| 210983_s_at  | 2.58 | MCM7          | MCM7 minichromosome maintenance deficient 7 (S. cerevisiae)                                                                              |
| 220043_s_at  | 2.57 | MF12          | antigen p97 (melanoma associated) identified by monoclonal antibodies 133.2 and 96.5                                                     |
| 219239_s_at  | 2.57 | FLJ10997      | hypothetical protein FLJ10997                                                                                                            |
| 33760_at     | 2.56 | PEX14         | peroxisomal biogenesis factor 14                                                                                                         |
| 1554456_a_at | 2.55 | WINS1         | WINS1 protein with Drosophila Lines (Lin) homologous domain                                                                              |
| 202290_at    | 2.54 | PDAP1         | PDGFA associated protein 1                                                                                                               |
| 212873_at    | 2.54 | HA-1          | minor histocompatibility antigen HA-1                                                                                                    |
| 215905_s_at  | 2.54 | HPRP8BP       | U5 snRNP-specific 40 kDa protein (hPrp8-binding)                                                                                         |
| 218273_s_at  | 2.54 | PPM2C         | protein phosphatase 2C, magnesium-dependent, catalytic subunit                                                                           |
| 203775_at    | 2.53 | SLC25A13      | solute carrier family 25, member 13 (citrin)                                                                                             |
| 209811_at    | 2.53 | CASP2         | caspase 2, apoptosis-related cysteine protease (neural precursor cell expressed, developmentally down-regulated 2)                       |
| 200972_at    | 2.52 | TM4SF8        | transmembrane 4 superfamily member 8                                                                                                     |
| 216088_s_at  | 2.51 | PSMA7         |                                                                                                                                          |
| 215931_s_at  | 2.49 | ARFGEF2       | ADP-ribosylation factor guanine nucleotide-exchange factor 2 (brefeldin A-inhibited)                                                     |
| 203636_at    | 2.49 | MID1          | midline 1 (Opitz/BBB syndrome)                                                                                                           |
| 212721_at    | 2.48 | SFRS12        | splicing factor, arginine/serine-rich 12                                                                                                 |
| 209466_x_at  | 2.48 | PTN           | pleiotrophin (heparin binding growth factor 8, neurite growth-promoting factor 1)                                                        |
| 221039_s_at  | 2.47 | DDEF1         | synonyms: PAP, PAG2, ASAP1, ZG14P, KIAA1249; Homo sapiens development and differentiation enhancing factor 1 (DDEF1), mRNA.              |
| 222474_s_at  | 2.47 | TOMM22        | chromosome 22 open reading frame 2                                                                                                       |
| 205882_x_at  | 2.45 | ADD3          | adducin 3 (gamma)                                                                                                                        |
| 213194_at    | 2.45 | ROBO1         | roundabout, axon guidance receptor, homolog 1 (Drosophila)                                                                               |
| 226524_at    | 2.45 | MGC26717      | hypothetical protein MGC26717                                                                                                            |
| 209080_x_at  | 2.44 | TXNL2         | thioredoxin-like 2                                                                                                                       |
| 242838_at    | 2.43 | FLJ12748      | zt16g02.r1 NCL CGAP_GCB1 Homo sapiens cDNA clone IMAGE:713330 5', mRNA sequence.                                                         |
| 203637_s_at  | 2.43 | MID1          | midline 1 (Opitz/BBB syndrome)                                                                                                           |
| 221041_s_at  | 2.42 | SLC17A5       | solute carrier family 17 (anion/sugar transporter), member 5                                                                             |
| 210813_s_at  | 2.41 | XRCC4         | X-ray repair complementing defective repair in Chinese hamster cells 4                                                                   |
| 222679_s_at  | 2.40 | RP42          | RP42 homolog                                                                                                                             |
| 216267_s_at  | 2.40 | PL6           | placental protein 6                                                                                                                      |
| 223203_at    | 2.40 | PRO0659       | PRO0659 protein                                                                                                                          |
| 203621_at    | 2.38 | NDUF85        | NADH dehydrogenase (ubiquinone) 1 beta subcomplex, 5, 16kDa                                                                              |
| 200883_at    | 2.37 | UQCRC2        | ubiquinol-cytochrome c reductase core protein II                                                                                         |
| 202394_s_at  | 2.36 | ABC3          | ATP-binding cassette, sub-family F (GCN20), member 3                                                                                     |
| 204593_s_at  | 2.34 | FLJ20232      | hypothetical protein FLJ20232                                                                                                            |
| 201155_s_at  | 2.34 | MFN2          | mitofusin 2                                                                                                                              |
| 202168_at    | 2.34 | TAF9          | TAF9 RNA polymerase II, TATA box binding protein (TBP)-associated factor, 32kDa                                                          |
| 201336_at    | 2.33 | VAMP3         | vesicle-associated membrane protein 3 (cellubrevin)                                                                                      |
| 200929_at    | 2.33 | TMP21         | transmembrane trafficking protein                                                                                                        |
| 217367_s_at  | 2.33 | ZHX3          | zinc fingers and homeoboxes 3                                                                                                            |
| 224836_at    | 2.30 | C20orf110     |                                                                                                                                          |
| 231912_s_at  | 2.30 | DKFZP434B0335 | DKFZP434B0335 protein                                                                                                                    |
| 218580_x_at  | 2.30 | AKIP          | hypothetical protein MGC3047                                                                                                             |
| 225612_s_at  | 2.29 | B3GNT5        | 7d27a05.x1 NCL CGAP_Pr28 Homo sapiens cDNA clone IMAGE:3248432 3', mRNA sequence.                                                        |
| 1553559_at   | 2.27 | LOC134285     | hypothetical protein LOC134285                                                                                                           |
| 1555609_a_at | 2.27 | WIG1          | p53 target zinc finger protein                                                                                                           |
| 219819_s_at  | 2.26 | MRPS28        | mitochondrial ribosomal protein S28                                                                                                      |
| 219628_at    | 2.26 | WIG1          | p53 target zinc finger protein                                                                                                           |
| 227063_at    | 2.26 | MGC40107      | phospholipid scramblase 3                                                                                                                |
| 201248_s_at  | 2.24 | SREBF2        | sterol regulatory element binding transcription factor 2                                                                                 |
| 222465_at    | 2.23 | C15orf15      | chromosome 15 open reading frame 15                                                                                                      |
| 211137_s_at  | 2.22 | ATP2C1        | ATPase, Ca++ transporting, type 2C, member 1                                                                                             |
| 218593_at    | 2.21 | FLJ10377      | hypothetical protein FLJ10377                                                                                                            |
| 225552_x_at  | 2.21 | AKIP          | hypothetical protein MGC3047                                                                                                             |
| 224573_at    | 2.17 | MGC49942      | hypothetical protein MGC49942                                                                                                            |
| 209665_at    | 2.17 | CYB561D2      | putative tumor suppressor 101F6                                                                                                          |
| 218793_s_at  | 2.15 | SCML1         | sex comb on midleg-like 1 (Drosophila)                                                                                                   |
| 226359_at    | 2.14 | GTPBP1        | GTP binding protein 1                                                                                                                    |
| 201034_at    | 2.13 | HADHSC        | adducin 3 (gamma)                                                                                                                        |
| 208050_s_at  | 2.13 | CASP2         | caspase 2, apoptosis-related cysteine protease (neural precursor cell expressed, developmentally down-regulated 2)                       |
| 202572_s_at  | 2.12 | DLGAP4        | disks large-associated protein 4                                                                                                         |
| 214718_at    | 2.11 | ODAG          | ocular development-associated gene                                                                                                       |
| 221203_s_at  | 2.10 | FLJ10201      | hypothetical protein FLJ10201                                                                                                            |
| 218898_at    | 2.10 | CT120         | membrane protein expressed in epithelial-like lung adenocarcinoma                                                                        |
| 218212_s_at  | 2.10 | MOCS2         | molybdenum cofactor synthesis 2                                                                                                          |
| 228201_at    | 2.09 | DKFZp761H079  | 7g22a10.x1 NCL CGAP_Brn23 Homo sapiens cDNA clone IMAGE:3307194 3', mRNA sequence.                                                       |
| 201114_x_at  | 2.09 | PSMA7         | proteasome (prosome, macropain) subunit, alpha type, 7                                                                                   |
| 207396_s_at  | 2.08 | ALG3          | asparagine-linked glycosylation 3 homolog (yeast, alpha-1,3-mannosyltransferase)                                                         |
| 1554321_a_at | 2.08 | NFS1          | NFS1 nitrogen fixation 1 (S. cerevisiae)                                                                                                 |
| 218472_s_at  | 2.08 | PELO          | pelota homolog (Drosophila)                                                                                                              |
| 201753_s_at  | 2.07 | ADD3          | adducin 3 (gamma)                                                                                                                        |
| 212244_at    | 2.06 | GRINL1A       | glutamate receptor, ionotropic, N-methyl D-aspartate-like 1A                                                                             |
| 217918_at    | 2.05 | DNCL2A        | dynein, cytoplasmic, light polypeptide 2A                                                                                                |
| 224332_s_at  | 2.04 | MRPL43        | mitochondrial ribosomal protein L43                                                                                                      |
| 217917_s_at  | 2.03 | DNCL2A        | dynein, cytoplasmic, light polypeptide 2A                                                                                                |
| 203510_at    | 2.02 | MET           | met proto-oncogene (hepatocyte growth factor receptor)                                                                                   |
| 218495_at    | 2.01 | UXT           | ubiquitously-expressed transcript                                                                                                        |
| 219096_at    | 2.00 | MYBBP1A       | MYB binding protein (P160) 1a                                                                                                            |
| 219244_s_at  | 1.98 | MRPL46        | mitochondrial ribosomal protein L46                                                                                                      |
| 225261_x_at  | 1.98 | TH1L          | TH1-like (Drosophila)                                                                                                                    |
| 225359_at    | 1.97 | TIM14         | homolog of yeast TIM14                                                                                                                   |
| 212422_at    | 1.96 | PDCD11        | programmed cell death 11                                                                                                                 |
| 223441_at    | 1.96 | SLC17A5       | solute carrier family 17 (anion/sugar transporter), member 5                                                                             |
| 1555789_s_at | 1.95 | MGC2941       | GABA(A) receptor-associated protein                                                                                                      |
| 203667_at    | 1.93 | TBCA          | tubulin-specific chaperone a                                                                                                             |
| 202027_at    | 1.91 | C22orf5       | chromosome 22 open reading frame 5                                                                                                       |
| 211704_s_at  | 1.90 | SPIN2         | spindlin family, member 2                                                                                                                |
| 217843_s_at  | 1.88 | VDRIP         | vitamin D receptor interacting protein                                                                                                   |
| 209254_at    | 1.86 | KIAA0265      | KIAA0265 protein                                                                                                                         |
| 225865_x_at  | 1.86 | TH1L          | Homo sapiens mRNA for putative protein TH1, partial, clone IMAGE ID 785447.                                                              |
| 210946_at    | 1.85 | PPAP2A        | phosphatidic acid phosphatase type 2A                                                                                                    |
| 224345_x_at  | 1.85 | E2IG5         |                                                                                                                                          |
| 206632_s_at  | 1.85 | APOBEC3B      | apolipoprotein B mRNA editing enzyme, catalytic polypeptide-like 3B                                                                      |
| 217972_at    | 1.84 | CHCHD3        | coiled-coil-helix-coiled-coil-helix domain containing 3                                                                                  |
| 225006_x_at  | 1.80 | TH1L          | TH1-like (Drosophila)                                                                                                                    |
| 205633_s_at  | 1.79 | ALAS1         | aminolevulinatase, delta-, synthase 1                                                                                                    |

|             |      |         |                                                                        |
|-------------|------|---------|------------------------------------------------------------------------|
| 220607_x_at | 1.77 | TH1L    | TH1-like (Drosophila)                                                  |
| 221641_s_at | 1.73 | ACATE2  | likely ortholog of mouse acyl-Coenzyme A thioesterase 2, mitochondrial |
| 203277_at   | 1.71 | DFFA    | DNA fragmentation factor, 45kDa, alpha polypeptide                     |
| 223193_x_at | 1.71 | E2IG5   | growth and transformation-dependent protein                            |
| 200830_at   | 1.63 | PSMD2   | proteasome (prosome, macropain) 26S subunit, non-ATPase, 2             |
| 212600_s_at | 1.60 | UQCRC2  | AV727381 HTC Homo sapiens cDNA clone HTCCEF02 5', mRNA sequence.       |
| 201527_at   | 1.57 | ATP6V1F | ATPase, H+ transporting, lysosomal 14kDa, V1 subunit F                 |
| 202716_at   | 1.54 | PTPN1   | protein tyrosine phosphatase, non-receptor type 1                      |
| 214205_x_at | 1.38 | TXNL2   | thioredoxin-like 2                                                     |
